# Supplementary material for: An In Vivo Kras Allelic Series Reveals Distinct Phenotypes of Common Oncogenic Variants
Source: Oxford University Press journal article supplement (doi:10.1158/2159-8290.cd-20-0442), 2020-08-12
Supplement: 21598290cd200442-sup-240834_2_supp_6404212_qd0276.docx [file 21598290cd200442-sup-240834_2_supp_6404212_qd0276.docx]

| **Kras mutation type** | **Positive clones /**  **# Screened** |
| --- | --- |
| G12C | 1/96 |
| G13D | 2/144 |
| G12R | 1/96 |
| G12V | 1/48 |
| G12A | 3/96 |
| G12S | 2/96 |

Supplementary Table 1. Clone identification frequency
