# Supplementary material for: An In Vivo Kras Allelic Series Reveals Distinct Phenotypes of Common Oncogenic Variants
Source: Oxford University Press journal article supplement (doi:10.1158/2159-8290.cd-20-0442), 2020-08-12
Supplement: 21598290cd200442-sup-240834_2_supp_6404213_qd0276.xlsx [file 21598290cd200442-sup-240834_2_supp_6404213_qd0276.xlsx]

## Sheet: 171005.nodbsnp.mutect.allEffect
CHROM	POS	REF	ALT	GENE	TRANSCRIPT	BASE PAIR CHANGE	AMINO ACID CHANGE	EFFECT	SAMPLE COUNT	Px1	G12V	G12R	G12C	G13D2	F2	Px2	F1	G13D1	Mc38
18	31440445	G	T	Syt4	ENSMUST00000025110.3	c.1016C>A	p.Ser339Tyr	missense_variant	1	0.211 (24/116)	-	-	-	-	-	-	-	-	-
18	31440445	G	T	Gm26658	ENSMUST00000181067.1	n.111+17G>T		intron_variant	1	0.211 (24/116)	-	-	-	-	-	-	-	-	-
2	135317868	C	T	Plcb1	ENSMUST00000110116.7	c.1250C>T	p.Ser417Phe	missense_variant&splice_region_variant	1	0.191 (28/138)	-	-	-	-	-	-	-	-	-
19	10554541	G	T	Tmem216	ENSMUST00000123788.7	c.196C>A	p.Arg66Arg	synonymous_variant	1	0.182 (28/145)	-	-	-	-	-	-	-	-	-
7	140400899	C	A	Olfr531	ENSMUST00000080153.2	c.146G>T	p.Ser49Ile	missense_variant	1	0.156 (17/110)	-	-	-	-	-	-	-	-	-
4	100988162	C	A	Cachd1	ENSMUST00000030257.14	c.2850C>A	p.Val950Val	synonymous_variant	1	0.151 (11/66)	-	-	-	-	-	-	-	-	-
9	122856865	G	T	Zfp445	ENSMUST00000056467.7	c.649-40C>A		intron_variant	1	0.133 (8/54)	-	-	-	-	-	-	-	-	-
9	50866565	GGGTTC	G	Ppp2r1b	ENSMUST00000174628.7	c.811_815delGTTCG	p.Val271fs	frameshift_variant	1	0.104 (12/118)	-	-	-	-	-	-	-	-	-
17	36056486	A	C	Gm6034	ENSMUST00000097331.1	c.192+30A>C		intron_variant	1	0.096 (16/171)	-	-	-	-	-	-	-	-	-
17	36056486	A	C	Gm11127	ENSMUST00000113742.2	c.890-47T>G		intron_variant	1	0.096 (16/171)	-	-	-	-	-	-	-	-	-
17	56070925	G	A	Ubxn6	ENSMUST00000019722.11	c.502C>T	p.Arg168Trp	missense_variant	1	0.085 (9/107)	-	-	-	-	-	-	-	-	-
17	56070925	G	A	Chaf1a	ENSMUST00000002914.8	c.*3375G>A		downstream_gene_variant	1	0.085 (9/107)	-	-	-	-	-	-	-	-	-
11	99566312	T	A	Krtap3-1	ENSMUST00000055502.4	c.272A>T	p.Glu91Val	missense_variant	1	-	0.588 (12/21)	-	-	-	-	-	-	-	-
18	4674468	G	T	9430020K01Rik	ENSMUST00000037029.5	c.2229G>T	p.Lys743Asn	missense_variant	1	-	0.467 (17/38)	-	-	-	-	-	-	-	-
7	118127127	CACTT	C	Arl6ip1	ENSMUST00000032888.9	c.170+3_170+6delAAGT		splice_region_variant&intron_variant	1	-	0.449 (27/62)	-	-	-	-	-	-	-	-
7	118127127	CACTT	C	Smg1	ENSMUST00000032891.14	c.*8410_*8413delAAGT		downstream_gene_variant	1	-	0.449 (27/62)	-	-	-	-	-	-	-	-
15	77786604	C	G	Myh9	ENSMUST00000016771.12	c.1437G>C	p.Leu479Leu	synonymous_variant	3	-	0.13 (16/100)	-	-	-	-	0.082 (10/96)	-	0.075 (10/88)	-
8	80704808	A	T	Smarca5	ENSMUST00000043359.8	c.2779T>A	p.Tyr927Asn	missense_variant	1	-	0.106 (8/82)	-	-	-	-	-	-	-	-
X	53296371	G	T	Fam122c	ENSMUST00000114835.7	c.395G>T	p.Arg132Leu	missense_variant	1	-	-	1.0 (56/56)	-	-	-	-	-	-	-
6	72235052	T	C	Atoh8	ENSMUST00000042646.7	c.113A>G	p.Asn38Ser	missense_variant	1	-	-	0.676 (29/44)	-	-	-	-	-	-	-
12	73702578	G	A	Prkch	ENSMUST00000021527.14	c.1101G>A	p.Gly367Gly	synonymous_variant	1	-	-	0.597 (46/77)	-	-	-	-	-	-	-
15	36483996	G	A	Ankrd46	ENSMUST00000057486.7	c.455C>T	p.Thr152Met	missense_variant	1	-	-	0.593 (17/32)	-	-	-	-	-	-	-
4	81385201	A	T	Mpdz	ENSMUST00000107262.7	c.499T>A	p.Phe167Ile	missense_variant	1	-	-	0.534 (49/93)	-	-	-	-	-	-	-
15	84312696	C	T	Parvb	ENSMUST00000023072.6	c.949-7C>T		splice_region_variant&intron_variant	1	-	-	0.517 (20/39)	-	-	-	-	-	-	-
4	149647507	A	G	Clstn1	ENSMUST00000039144.6	c.2883A>G	p.Gly961Gly	synonymous_variant	4	-	-	0.5 (10/20)	0.368 (10/26)	1.0 (17/17)	-	-	-	0.6 (11/19)	-
4	149647507	A	G	Pik3cd	ENSMUST00000105690.8	c.*3133T>C		downstream_gene_variant	4	-	-	0.5 (10/20)	0.368 (10/26)	1.0 (17/17)	-	-	-	0.6 (11/19)	-
15	91321539	G	C	Slc2a13	ENSMUST00000109283.1	c.1412+32C>G		intron_variant	1	-	-	0.483 (14/31)	-	-	-	-	-	-	-
11	69642149	C	T	Fxr2	ENSMUST00000018909.3	c.543+9C>T		intron_variant	1	-	-	0.477 (25/55)	-	-	-	-	-	-	-
6	134869640	G	A	Gpr19	ENSMUST00000046255.13	c.821C>T	p.Thr274Met	missense_variant	1	-	-	0.463 (28/60)	-	-	-	-	-	-	-
9	52126536	G	A	Zc3h12c	ENSMUST00000165519.1	c.973+27C>T		intron_variant	1	-	-	0.429 (13/31)	-	-	-	-	-	-	-
8	110418508	C	T	Hydin	ENSMUST00000043141.6	c.2490C>T	p.Val830Val	synonymous_variant	1	-	-	-	0.404 (24/56)	-	-	-	-	-	-
8	110418508	C	T	Gm23627	ENSMUST00000082459.1	n.*2853G>A		downstream_gene_variant	1	-	-	-	0.404 (24/56)	-	-	-	-	-	-
2	144491829	G	A	Dzank1	ENSMUST00000163701.1	c.1083C>T	p.Ser361Ser	synonymous_variant	1	-	-	-	0.368 (10/27)	-	-	-	-	-	-
2	144491829	G	A	Zfp133-ps	ENSMUSG00000083674	n.144491829G>A		intragenic_variant	1	-	-	-	0.368 (10/27)	-	-	-	-	-	-
5	25692879	C	T	Gm43143	ENSMUST00000196083.1	n.-3484G>A		upstream_gene_variant	1	-	-	-	0.358 (26/68)	-	-	-	-	-	-
5	25692879	C	T	Xrcc2	ENSMUST00000030773.11	c.122-51G>A		intron_variant	1	-	-	-	0.358 (26/68)	-	-	-	-	-	-
15	66689254	G	C	Tg	ENSMUST00000065916.13	c.3143-19G>C		intron_variant	1	-	-	-	0.341 (37/105)	-	-	-	-	-	-
10	74991755	C	G	Gnaz	ENSMUST00000037813.4	c.338C>G	p.Pro113Arg	missense_variant	1	-	-	-	0.29 (10/36)	-	-	-	-	-	-
10	74991755	C	G	Rsph14	ENSMUST00000166088.7	c.521-30023G>C		intron_variant	1	-	-	-	0.29 (10/36)	-	-	-	-	-	-
10	60358903	G	A	Vsir	ENSMUST00000020301.13	c.509-41G>A		intron_variant	1	-	-	-	0.286 (18/62)	-	-	-	-	-	-
10	60358903	G	A	Cdh23	ENSMUST00000105461.9	c.4845+17886C>T		intron_variant	1	-	-	-	0.286 (18/62)	-	-	-	-	-	-
15	81377800	T	TGGCTCTCTTGGCGTACAGAATAGCCAAGCGAGGA	St13	ENSMUST00000172107.7	c.465-3_465-2insTCCTCGCTTGGCTATTCTGTACGCCAAGAGAGCC		splice_region_variant&intron_variant	1	-	-	-	0.214 (25/121)	-	-	-	-	-	-
8	61671876	A	G	Palld	ENSMUST00000121785.8	c.1985+12859T>C		intron_variant	1	-	-	-	0.203 (20/98)	-	-	-	-	-	-
15	81378001	C	CATCATTTAGGGCTTCAATGGCAGCCCCCTTCTTCTCATT	St13	ENSMUST00000172107.7	c.380-2_380-1insAATGAGAAGAAGGGGGCTGCCATTGAAGCCCTAAATGAT		splice_acceptor_variant&intron_variant	1	-	-	-	0.118 (11/105)	-	-	-	-	-	-
15	81392324	T	TCTCCACCCACTCCCTCAGGAAGCGCATTTCCTCGGTGTGCAGGACGC	St13	ENSMUST00000172107.7	c.111-3_111-2insGCGTCCTGCACACCGAGGAAATGCGCTTCCTGAGGGAGTGGGTGGAG		splice_region_variant&intron_variant	1	-	-	-	0.07 (8/145)	-	-	-	-	-	-
17	88636720	C	T	Ston1	ENSMUST00000064035.12	c.1553C>T	p.Ala518Val	missense_variant	1	-	-	-	-	0.493 (37/79)	-	-	-	-	-
2	156003858	T	A	6430550D23Rik	ENSMUST00000109617.8	c.78A>T	p.Ala26Ala	synonymous_variant	1	-	-	-	-	0.457 (24/53)	-	-	-	-	-
2	156003858	T	A	Ergic3	ENSMUST00000088650.10	c.-4283T>A		upstream_gene_variant	1	-	-	-	-	0.457 (24/53)	-	-	-	-	-
2	156003858	T	A	Cep250	ENSMUST00000109619.8	c.*5427T>A		downstream_gene_variant	1	-	-	-	-	0.457 (24/53)	-	-	-	-	-
5	150388901	G	A	Fry	ENSMUST00000087204.8	c.2280G>A	p.Ser760Ser	synonymous_variant	1	-	-	-	-	0.412 (8/20)	-	-	-	-	-
14	56119437	C	T	Gzme	ENSMUST00000089549.6	c.67G>A	p.Gly23Ser	missense_variant	1	-	-	-	-	0.396 (48/119)	-	-	-	-	-
5	105480023	C	G	Lrrc8b	ENSMUST00000112707.2	c.234C>G	p.Asn78Lys	missense_variant	1	-	-	-	-	0.378 (15/43)	-	-	-	-	-
11	68594349	C	T	Ccdc42	ENSMUST00000154294.7	c.688C>T	p.Arg230Trp	missense_variant	1	-	-	-	-	0.375 (16/39)	-	-	-	-	-
5	146950495	G	T	Mtif3	ENSMUST00000016654.8	c.*5099C>A		downstream_gene_variant	1	-	-	-	-	0.125 (12/111)	-	-	-	-	-
5	146950495	G	T	Gtf3a	ENSMUST00000146511.7	c.196-38G>T		intron_variant	1	-	-	-	-	0.125 (12/111)	-	-	-	-	-
5	146950493	A	T	Mtif3	ENSMUST00000016654.8	c.*5101T>A		downstream_gene_variant	1	-	-	-	-	0.125 (12/108)	-	-	-	-	-
5	146950493	A	T	Gtf3a	ENSMUST00000146511.7	c.196-40A>T		intron_variant	1	-	-	-	-	0.125 (12/108)	-	-	-	-	-
6	113789889	C	T	Atp2b2	ENSMUST00000101044.8	c.1523G>A	p.Arg508His	missense_variant	1	-	-	-	-	-	0.456 (38/83)	-	-	-	-
8	75110119	G	GTGAA	Mcm5	ENSMUST00000164309.2	c.199_202dupGAAT	p.Tyr68fs	frameshift_variant&stop_gained	1	-	-	-	-	-	0.451 (46/109)	-	-	-	-
6	55474493	C	T	Adcyap1r1	ENSMUST00000167234.7	c.266-67C>T		intron_variant	1	-	-	-	-	-	0.404 (27/63)	-	-	-	-
4	126165456	G	A	Thrap3	ENSMUST00000080919.11	c.2796C>T	p.Asp932Asp	synonymous_variant	1	-	-	-	-	-	0.349 (15/43)	-	-	-	-
4	126165456	G	A	Sh3d21	ENSMUST00000097891.3	c.-2228C>T		upstream_gene_variant	1	-	-	-	-	-	0.349 (15/43)	-	-	-	-
12	56696593	G	A	Pax9	ENSMUST00000001538.9	c.24G>A	p.Val8Val	synonymous_variant	1	-	-	-	-	-	0.343 (19/50)	-	-	-	-
12	56696593	G	A	Gm15524	ENSMUST00000159874.2	n.-3629C>T		upstream_gene_variant	1	-	-	-	-	-	0.343 (19/50)	-	-	-	-
10	68001911	G	T	Rtkn2	ENSMUST00000068994.13	c.305-13G>T		intron_variant	1	-	-	-	-	-	0.333 (12/36)	-	-	-	-
5	142905459	C	T	Actb	ENSMUST00000100497.10	c.141G>A	p.Met47Ile	missense_variant	1	-	-	-	-	-	0.326 (18/56)	-	-	-	-
8	84924000	T	TC	Gm24197	ENSMUST00000175085.1	n.*1524dupG		downstream_gene_variant	1	-	-	-	-	-	0.222 (10/44)	-	-	-	-
8	84924000	T	TC	Mast1	ENSMUST00000109741.8	c.1163+27dupG		intron_variant	1	-	-	-	-	-	0.222 (10/44)	-	-	-	-
3	95845023	G	A	Prpf3	ENSMUST00000015892.13	c.937C>T	p.Pro313Ser	missense_variant	1	-	-	-	-	-	0.216 (22/106)	-	-	-	-
5	34669097	TCAAA	T	Grk4	ENSMUST00000001112.13	c.53-12_53-9delCAAA		intron_variant	1	-	-	-	-	-	0.133 (8/63)	-	-	-	-
4	101054582	AAC	A	Gm10576	ENSMUST00000191927.1	n.680_681delGT		non_coding_transcript_exon_variant	1	-	-	-	-	-	0.111 (12/94)	-	-	-	-
12	115294268	A	G	Ighv8-8	ENSMUST00000192591.1	c.152T>C	p.Phe51Ser	missense_variant	1	-	-	-	-	-	0.059 (9/142)	-	-	-	-
17	37151895	A	T	Olfr93	ENSMUST00000171679.1	c.76T>A	p.Phe26Ile	missense_variant	1	-	-	-	-	-	0.054 (9/178)	-	-	-	-
X	77864856	G	T	Gm14744	ENSMUST00000114039.2	c.44G>T	p.Cys15Phe	missense_variant	1	-	-	-	-	-	-	0.933 (74/79)	-	-	-
7	100831489	C	G	Fam168a	ENSMUST00000208013.1	c.495+19C>G		intron_variant	1	-	-	-	-	-	-	0.594 (28/46)	-	-	-
5	75623162	C	T	Kit	ENSMUST00000005815.6	c.1240+58C>T		intron_variant	1	-	-	-	-	-	-	0.545 (19/35)	-	-	-
15	35652320	G	A	Vps13b	ENSMUST00000048646.7	c.4696G>A	p.Ala1566Thr	missense_variant	1	-	-	-	-	-	-	0.508 (82/161)	-	-	-
7	102113333	C	G	Chrna10	ENSMUST00000084830.1	c.649G>C	p.Gly217Arg	missense_variant	1	-	-	-	-	-	-	0.5 (9/18)	-	-	-
7	102113333	C	G	Art1	ENSMUST00000033300.3	c.*2532C>G		downstream_gene_variant&intragenic_variant	1	-	-	-	-	-	-	0.5 (9/18)	-	-	-
15	4518890	G	T	Plcxd3	ENSMUST00000061925.4	c.812+1563G>T		intron_variant	1	-	-	-	-	-	-	0.494 (46/92)	-	-	-
2	6934581	C	A	Celf2	ENSMUSG00000002107	n.6934581G>T		intragenic_variant	1	-	-	-	-	-	-	0.487 (75/155)	-	-	-
2	6934581	C	A	Gm10855	ENSMUST00000100426.2	n.501G>T		non_coding_transcript_exon_variant	1	-	-	-	-	-	-	0.487 (75/155)	-	-	-
10	88459690	G	A	Sycp3	ENSMUST00000020252.9	c.25G>A	p.Asp9Asn	missense_variant	1	-	-	-	-	-	-	0.438 (19/42)	-	-	-
10	88459690	G	A	Chpt1	ENSMUSG00000060002	n.88459690C>T		intragenic_variant	1	-	-	-	-	-	-	0.438 (19/42)	-	-	-
14	53795514	T	TG	B230359F08Rik	ENSMUST00000103671.3	c.52+8_52+9insG		intron_variant	1	-	-	-	-	-	-	0.411 (52/151)	-	-	-
14	53795516	GC	G	B230359F08Rik	ENSMUST00000103671.3	c.52+11delC		intron_variant	1	-	-	-	-	-	-	0.408 (52/150)	-	-	-
4	43302403	G	A	Atp8b5	ENSMUST00000107942.8	c.104-179G>A		intron_variant	1	-	-	-	-	-	-	0.093 (9/89)	-	-	-
10	89620816	C	T	Slc17a8	ENSMUST00000020102.13	c.84G>A	p.Ser28Ser	synonymous_variant	1	-	-	-	-	-	-	0.066 (9/146)	-	-	-
14	53757422	C	A	Trav13-4-dv7	ENSMUST00000180380.2	c.13C>A	p.Leu5Met	missense_variant	1	-	-	-	-	-	-	0.058 (14/187)	-	-	-
2	11705850	G	A	Il15ra	ENSMUST00000078834.11	c.3G>A	p.Met1?	start_lost	1	-	-	-	-	-	-	-	0.381 (10/27)	-	-
1	164796979	G	A	Dpt	ENSMUST00000027861.5	c.248G>A	p.Ser83Asn	missense_variant	1	-	-	-	-	-	-	-	0.294 (11/42)	-	-
15	44505653	G	T	Pkhd1l1	ENSMUST00000209244.1	c.2693G>T	p.Gly898Val	missense_variant	1	-	-	-	-	-	-	-	0.25 (26/103)	-	-
6	148843038	G	A	Caprin2	ENSMUST00000111569.8	c.2888C>T	p.Pro963Leu	missense_variant	1	-	-	-	-	-	-	-	0.241 (21/91)	-	-
3	109934857	G	A	Ntng1	ENSMUST00000072596.11	c.599C>T	p.Thr200Met	missense_variant	1	-	-	-	-	-	-	-	0.238 (14/52)	-	-
1	173785093	C	A	Gm16340	ENSMUST00000155076.1	n.802-3898G>T		intron_variant	1	-	-	-	-	-	-	-	0.235 (31/120)	-	-
2	90119473	G	A	Olfr1269	ENSMUST00000099756.3	c.124C>T	p.Leu42Phe	missense_variant	1	-	-	-	-	-	-	-	0.222 (35/161)	-	-
7	44516006	T	G	Mybpc2	ENSMUST00000165208.3	c.1038A>C	p.Pro346Pro	synonymous_variant	1	-	-	-	-	-	-	-	0.213 (24/92)	-	-
8	57474511	C	G	Scrg1	ENSMUST00000034023.3	c.195C>G	p.Cys65Trp	missense_variant	1	-	-	-	-	-	-	-	0.192 (18/87)	-	-
4	62513483	G	C	Alad	ENSMUST00000030090.3	c.164+49C>G		intron_variant	1	-	-	-	-	-	-	-	0.174 (27/139)	-	-
13	55625035	G	T	Caml	ENSMUST00000021963.4	c.491G>T	p.Arg164Leu	missense_variant	1	-	-	-	-	-	-	-	0.167 (8/48)	-	-
5	142905323	C	T	Actb	ENSMUST00000100497.10	c.277G>A	p.Glu93Lys	missense_variant	1	-	-	-	-	-	-	-	0.167 (10/64)	-	-
2	120924153	G	A	Ubr1	ENSMUST00000028728.5	c.2233C>T	p.Gln745*	stop_gained	1	-	-	-	-	-	-	-	0.154 (8/57)	-	-
11	67253426	C	T	Myh4	ENSMUST00000018632.10	c.3621C>T	p.Leu1207Leu	synonymous_variant	1	-	-	-	-	-	-	-	0.1 (8/47)	-	-
14	21985414	G	C	Zfp503	ENSMUST00000043409.7	c.1433C>G	p.Thr478Arg	missense_variant	1	-	-	-	-	-	-	-	-	0.545 (8/13)	-
11	42626714	C	T	Gabrb2	ENSMUST00000192403.1	c.1362C>T	p.Asn454Asn	synonymous_variant	1	-	-	-	-	-	-	-	-	0.524 (23/45)	-
11	51048141	C	T	Olfr1375	ENSMUST00000073543.1	c.33C>T	p.Val11Val	synonymous_variant	1	-	-	-	-	-	-	-	-	0.44 (67/148)	-
10	76302170	C	T	Dip2a	ENSMUST00000105417.9	c.1167+34G>A		intron_variant	1	-	-	-	-	-	-	-	-	0.127 (8/70)	-
10	76302168	G	T	Dip2a	ENSMUST00000105417.9	c.1167+36C>A		intron_variant	1	-	-	-	-	-	-	-	-	0.127 (8/69)	-
10	76302169	A	T	Dip2a	ENSMUST00000105417.9	c.1167+35T>A		intron_variant	1	-	-	-	-	-	-	-	-	0.127 (8/68)	-
11	101409633	ACT	A	Aarsd1	ENSMUST00000070395.8	c.1008+18_1008+19delAG		intron_variant	1	-	-	-	-	-	-	-	-	0.068 (11/146)	-
11	101409633	ACT	A	Gm27029	ENSMUST00000107259.3	c.1401+18_1401+19delAG		intron_variant	1	-	-	-	-	-	-	-	-	0.068 (11/146)	-
17	3505776	G	T	Tiam2	ENSMUST00000072156.6	c.3480G>T	p.Glu1160Asp	missense_variant&splice_region_variant	1	-	-	-	-	-	-	-	-	-	0.489 (58/111)
17	5725210	C	A	Zdhhc14	ENSMUST00000089185.4	c.753-17C>A		intron_variant	1	-	-	-	-	-	-	-	-	-	0.252 (40/149)
17	6017648	A	G	Synj2	ENSMUST00000115791.8	c.1940+21A>G		intron_variant	1	-	-	-	-	-	-	-	-	-	0.296 (8/30)
17	7376530	C	A	Gm9992	ENSMUST00000070059.3	c.379G>T	p.Gly127Trp	missense_variant	1	-	-	-	-	-	-	-	-	-	0.438 (17/40)
17	7376530	C	A	Gm26057	ENSMUST00000178099.1	n.-2173G>T		upstream_gene_variant	1	-	-	-	-	-	-	-	-	-	0.438 (17/40)
17	7773593	C	A	Fndc1	ENSMUST00000097425.9	c.1270G>T	p.Gly424*	stop_gained	1	-	-	-	-	-	-	-	-	-	0.467 (51/108)
17	7804877	T	G	Fndc1	ENSMUST00000097425.9	c.98A>C	p.Lys33Thr	missense_variant	1	-	-	-	-	-	-	-	-	-	0.255 (28/118)
17	11303745	G	T	Park2	ENSMUST00000191124.6	c.531+34G>T		intron_variant	1	-	-	-	-	-	-	-	-	-	0.5 (18/35)
17	12414184	C	A	Plg	ENSMUST00000014578.5	c.2031C>A	p.Ala677Ala	synonymous_variant	1	-	-	-	-	-	-	-	-	-	0.407 (72/175)
17	12414185	A	C	Plg	ENSMUST00000014578.5	c.2032A>C	p.Thr678Pro	missense_variant	1	-	-	-	-	-	-	-	-	-	0.404 (72/172)
17	12584625	C	G	Slc22a2	ENSMUST00000046959.7	c.345C>G	p.Ser115Arg	missense_variant	1	-	-	-	-	-	-	-	-	-	0.3 (20/60)
17	13226914	T	G	Smok2a	ENSMUST00000080647.4	c.1377T>G	p.Pro459Pro	synonymous_variant	1	-	-	-	-	-	-	-	-	-	0.132 (61/480)
17	13235178	A	C	Smok2b	ENSMUST00000059824.6	c.224A>C	p.Lys75Thr	missense_variant	1	-	-	-	-	-	-	-	-	-	0.096 (97/982)
17	13368461	AT	A	Tcp10c	ENSMUST00000097403.3	c.1056+261delT		intron_variant	1	-	-	-	-	-	-	-	-	-	1.0 (41/44)
17	13527503	A	C	Tcte2	ENSMUSG00000038347	n.13527503T>G		intragenic_variant	1	-	-	-	-	-	-	-	-	-	0.4 (8/20)
17	13527503	A	C	Smok4a	ENSMUST00000144015.1	n.1817A>C		non_coding_transcript_exon_variant	1	-	-	-	-	-	-	-	-	-	0.4 (8/20)
17	14375491	G	T	Smoc2	ENSMUST00000024660.8	c.879G>T	p.Arg293Arg	synonymous_variant	1	-	-	-	-	-	-	-	-	-	0.417 (21/44)
17	14684150	T	A	Thbs2	ENSMUST00000170872.1	c.954A>T	p.Ser318Ser	synonymous_variant	1	-	-	-	-	-	-	-	-	-	0.457 (21/46)
17	14990592	C	A	Gm3448	ENSMUSG00000079710	n.14990592G>T		intragenic_variant	1	-	-	-	-	-	-	-	-	-	0.404 (48/117)
17	14990592	C	A	Ermard	ENSMUSG00000036552	n.14990592C>A		intragenic_variant	1	-	-	-	-	-	-	-	-	-	0.404 (48/117)
17	15762502	G	C	Chd1	ENSMUST00000024627.13	c.4228G>C	p.Asp1410His	missense_variant	1	-	-	-	-	-	-	-	-	-	0.119 (8/77)
17	15768733	G	T	Chd1	ENSMUST00000024627.13	c.4747G>T	p.Gly1583Cys	missense_variant	1	-	-	-	-	-	-	-	-	-	0.403 (29/76)
17	17712817	G	A	Vmn2r90	ENSMUST00000169805.1	c.638G>A	p.Gly213Asp	missense_variant	1	-	-	-	-	-	-	-	-	-	0.412 (69/166)
17	17970993	C	A	Fpr3	ENSMUST00000054871.11	c.525C>A	p.His175Gln	missense_variant	1	-	-	-	-	-	-	-	-	-	0.521 (122/241)
17	18258388	G	T	Vmn2r94	ENSMUST00000172190.2	c.99-3C>A		splice_region_variant&intron_variant	1	-	-	-	-	-	-	-	-	-	0.424 (96/221)
17	18303939	T	C	Vmn2r93	ENSMUST00000079206.6	c.219-25T>C		intron_variant	1	-	-	-	-	-	-	-	-	-	0.256 (35/132)
17	19694043	C	A	Vmn2r102	ENSMUST00000171741.1	c.1869C>A	p.Tyr623*	stop_gained	1	-	-	-	-	-	-	-	-	-	0.25 (82/326)
17	20113393	C	A	Fpr-rs7	ENSMUST00000095637.1	c.834G>T	p.Trp278Cys	missense_variant	1	-	-	-	-	-	-	-	-	-	0.39 (79/196)
17	20113393	C	A	Vmn2r-ps126	ENSMUST00000176711.1	n.968-27699C>A		intron_variant	1	-	-	-	-	-	-	-	-	-	0.39 (79/196)
17	20228572	G	A	Vmn2r105	ENSMUST00000167382.1	c.342C>T	p.Val114Val	synonymous_variant	1	-	-	-	-	-	-	-	-	-	0.242 (40/173)
17	20550113	T	A	Vmn2r109	ENSMUST00000167093.1	c.1612A>T	p.Thr538Ser	missense_variant	1	-	-	-	-	-	-	-	-	-	0.184 (43/231)
17	20552994	C	T	Vmn2r109	ENSMUST00000167093.1	c.1364G>A	p.Arg455Lys	missense_variant	1	-	-	-	-	-	-	-	-	-	0.08 (8/103)
17	20846952	G	A	Vmn1r230	ENSMUST00000053974.1	c.402G>A	p.Trp134*	stop_gained	1	-	-	-	-	-	-	-	-	-	0.438 (40/93)
17	20994658	G	T	Vmn1r233	ENSMUST00000056339.1	c.29C>A	p.Ala10Asp	missense_variant	1	-	-	-	-	-	-	-	-	-	0.42 (32/80)
17	21011750	A	AT	Zfp160	ENSMUST00000088811.5	c.-8_-7insT		5_prime_UTR_variant	1	-	-	-	-	-	-	-	-	-	0.712 (54/74)
17	21314601	G	T	Vmn1r237	ENSMUST00000077301.4	c.585G>T	p.Leu195Leu	synonymous_variant	1	-	-	-	-	-	-	-	-	-	0.453 (48/110)
17	23401096	T	C	Vmn2r116	ENSMUST00000164856.1	c.1803T>C	p.Thr601Thr	synonymous_variant	1	-	-	-	-	-	-	-	-	-	0.286 (82/278)
17	23459766	A	G	Vmn2r117	ENSMUST00000171996.1	c.2483T>C	p.Val828Ala	missense_variant	1	-	-	-	-	-	-	-	-	-	0.464 (156/332)
17	23715763	G	C	1520401A03Rik	ENSMUST00000201734.3	c.494C>G	p.Ala165Gly	missense_variant	1	-	-	-	-	-	-	-	-	-	0.198 (19/108)
17	24042041	T	G	Prss27	ENSMUST00000059482.5	c.56-13T>G		intron_variant	1	-	-	-	-	-	-	-	-	-	0.465 (48/99)
17	24042043	C	G	Prss27	ENSMUST00000059482.5	c.56-11C>G		intron_variant	1	-	-	-	-	-	-	-	-	-	0.465 (47/98)
17	24182486	C	A	Gm43796	ENSMUST00000202853.1	c.965+2718G>T		intron_variant	1	-	-	-	-	-	-	-	-	-	0.395 (19/50)
17	24182486	C	A	Tbc1d24	ENSMUSG00000036473	n.24182486G>T		intragenic_variant	1	-	-	-	-	-	-	-	-	-	0.395 (19/50)
17	24318125	A	G	Abca17	ENSMUST00000039324.6	c.1452+31T>C		intron_variant	1	-	-	-	-	-	-	-	-	-	0.241 (14/60)
17	24426676	G	T	Eci1	ENSMUST00000024946.5	c.-27G>T		upstream_gene_variant	1	-	-	-	-	-	-	-	-	-	0.44 (14/31)
17	24426676	G	T	Rnps1	ENSMUST00000088512.11	c.*1491G>T		downstream_gene_variant	1	-	-	-	-	-	-	-	-	-	0.44 (14/31)
17	24426676	G	T	Rnps1-Eci1	ENSMUSG00000034681-ENSMUSG00000024132	n.24426676G>T		intergenic_region	1	-	-	-	-	-	-	-	-	-	0.44 (14/31)
17	24446145	G	A	E4f1	ENSMUST00000056032.7	c.1064C>T	p.Ser355Leu	missense_variant	1	-	-	-	-	-	-	-	-	-	0.321 (11/35)
17	24446145	G	A	Dnase1l2	ENSMUST00000088506.11	c.-3362C>T		upstream_gene_variant	1	-	-	-	-	-	-	-	-	-	0.321 (11/35)
17	24505038	C	A	Caskin1	ENSMUST00000024958.7	c.2799C>A	p.Asn933Lys	missense_variant	1	-	-	-	-	-	-	-	-	-	0.441 (16/37)
17	24505038	C	A	Traf7	ENSMUST00000088464.11	c.*4306G>T		downstream_gene_variant	1	-	-	-	-	-	-	-	-	-	0.441 (16/37)
17	24506473	G	T	Traf7	ENSMUST00000088464.11	c.*2871C>A		downstream_gene_variant	1	-	-	-	-	-	-	-	-	-	0.19 (9/49)
17	24506473	G	T	Caskin1	ENSMUST00000024958.7	c.3782-50G>T		intron_variant	1	-	-	-	-	-	-	-	-	-	0.19 (9/49)
17	24573795	C	T	Pkd1	ENSMUST00000035565.3	c.4455C>T	p.Gly1485Gly	synonymous_variant	1	-	-	-	-	-	-	-	-	-	0.476 (31/69)
17	25147802	A	T	Clcn7	ENSMUST00000040729.8	c.669+12A>T		intron_variant	1	-	-	-	-	-	-	-	-	-	0.412 (16/38)
17	25244768	C	A	Baiap3	ENSMUST00000182056.7	c.2802G>T	p.Arg934Ser	missense_variant	1	-	-	-	-	-	-	-	-	-	0.412 (10/20)
17	25244768	C	A	Gnptg	ENSMUST00000115154.10	c.-4657G>T		upstream_gene_variant	1	-	-	-	-	-	-	-	-	-	0.412 (10/20)
17	25244768	C	A	Tsr3	ENSMUST00000063574.6	c.*2107C>A		downstream_gene_variant	1	-	-	-	-	-	-	-	-	-	0.412 (10/20)
17	25244768	C	A	Mir3547	ENSMUST00000175461.2	n.*783G>T		downstream_gene_variant	1	-	-	-	-	-	-	-	-	-	0.412 (10/20)
17	25249186	A	C	Baiap3	ENSMUST00000182056.7	c.853T>G	p.Phe285Val	missense_variant	1	-	-	-	-	-	-	-	-	-	0.235 (23/95)
17	25249186	A	C	Mir3547	ENSMUST00000175461.2	n.-3548T>G		upstream_gene_variant	1	-	-	-	-	-	-	-	-	-	0.235 (23/95)
17	25368841	T	G	Tpsg1	ENSMUST00000024999.14	c.-1811T>G		upstream_gene_variant	1	-	-	-	-	-	-	-	-	-	0.479 (101/208)
17	25368841	T	G	Tpsb2	ENSMUST00000069616.7	c.*995T>G		downstream_gene_variant	1	-	-	-	-	-	-	-	-	-	0.479 (101/208)
17	25368841	T	G	Tpsb2-Tpsg1	ENSMUSG00000033825-ENSMUSG00000033200	n.25368841T>G		intergenic_region	1	-	-	-	-	-	-	-	-	-	0.479 (101/208)
17	25380602	C	G	Cacna1h	ENSMUST00000078496.11	c.5106G>C	p.Ala1702Ala	synonymous_variant	1	-	-	-	-	-	-	-	-	-	0.423 (12/31)
17	25753794	G	T	Msln	ENSMUST00000075884.6	c.112C>A	p.Gln38Lys	missense_variant	1	-	-	-	-	-	-	-	-	-	0.505 (59/114)
17	25784987	G	C	Ccdc78	ENSMUST00000095500.4	c.-1629G>C		upstream_gene_variant	1	-	-	-	-	-	-	-	-	-	0.277 (14/60)
17	25784987	G	C	Narfl	ENSMUST00000134108.7	c.*2733G>C		downstream_gene_variant	1	-	-	-	-	-	-	-	-	-	0.277 (14/60)
17	25784987	G	C	Mir6966	ENSMUST00000183975.1	n.*4108G>C		downstream_gene_variant	1	-	-	-	-	-	-	-	-	-	0.277 (14/60)
17	25784987	G	C	Haghl	ENSMUST00000077938.9	c.105+17C>G		intron_variant	1	-	-	-	-	-	-	-	-	-	0.277 (14/60)
17	25817011	G	C	Fbxl16	ENSMUST00000045692.7	c.581G>C	p.Gly194Ala	missense_variant	1	-	-	-	-	-	-	-	-	-	0.538 (24/46)
17	25817011	G	C	Gm26694	ENSMUST00000180868.1	n.1888+20230G>C		intron_variant	1	-	-	-	-	-	-	-	-	-	0.538 (24/46)
17	25860496	C	G	Wdr90	ENSMUST00000079461.14	c.663G>C	p.Gln221His	missense_variant	1	-	-	-	-	-	-	-	-	-	0.536 (15/30)
17	25860496	C	G	Fam195a	ENSMUST00000026828.5	c.*3473G>C		downstream_gene_variant	1	-	-	-	-	-	-	-	-	-	0.536 (15/30)
17	25860496	C	G	Gm26694	ENSMUST00000180868.1	n.1888+63715C>G		intron_variant	1	-	-	-	-	-	-	-	-	-	0.536 (15/30)
17	26088025	G	C	Decr2	ENSMUST00000040907.6	c.198C>G	p.Thr66Thr	synonymous_variant	1	-	-	-	-	-	-	-	-	-	0.069 (9/141)
17	26088025	G	C	Nme4	ENSMUST00000025007.5	c.*4004C>G		downstream_gene_variant	1	-	-	-	-	-	-	-	-	-	0.069 (9/141)
17	27344606	C	T	Gm10505	ENSMUST00000151398.1	n.1368C>T		non_coding_transcript_exon_variant	1	-	-	-	-	-	-	-	-	-	0.462 (21/45)
17	27632352	T	A	Rps10	ENSMUST00000114881.7	c.327A>T	p.Pro109Pro	synonymous_variant	1	-	-	-	-	-	-	-	-	-	0.518 (37/74)
17	27632352	T	A	Gm15420	ENSMUST00000133274.1	n.-2991T>A		upstream_gene_variant	1	-	-	-	-	-	-	-	-	-	0.518 (37/74)
17	27876676	C	G	Uhrf1bp1	ENSMUST00000114849.1	c.58C>G	p.Leu20Val	missense_variant	1	-	-	-	-	-	-	-	-	-	0.303 (25/84)
17	28318064	T	G	Fance	ENSMUST00000088007.10	c.176T>G	p.Leu59Arg	missense_variant	1	-	-	-	-	-	-	-	-	-	0.333 (19/58)
17	28661958	C	T	Slc26a8	ENSMUST00000114764.7	c.843G>A	p.Leu281Leu	synonymous_variant	1	-	-	-	-	-	-	-	-	-	0.513 (46/88)
17	29252230	C	A	Ppil1	ENSMUST00000024802.8	c.280+20G>T		intron_variant	1	-	-	-	-	-	-	-	-	-	0.565 (15/26)
17	30648540	A	G	Dnah8	ENSMUST00000170651.1	c.965A>G	p.Lys322Arg	missense_variant	1	-	-	-	-	-	-	-	-	-	0.224 (15/74)
17	30672402	G	T	Dnah8	ENSMUST00000170651.1	c.2337+43G>T		intron_variant	1	-	-	-	-	-	-	-	-	-	0.415 (26/63)
17	30774923	G	T	Dnah8	ENSMUST00000170651.1	c.10036-23G>T		intron_variant	1	-	-	-	-	-	-	-	-	-	0.464 (15/33)
17	31094599	C	G	Abcg1	ENSMUST00000024829.6	c.405-47C>G		intron_variant	1	-	-	-	-	-	-	-	-	-	0.5 (9/19)
17	31443188	C	T	Pde9a	ENSMUST00000047168.11	c.285C>T	p.Gly95Gly	synonymous_variant	1	-	-	-	-	-	-	-	-	-	0.279 (28/106)
17	31509899	G	C	Wdr4	ENSMUST00000171171.7	c.301C>G	p.Pro101Ala	missense_variant	1	-	-	-	-	-	-	-	-	-	0.203 (14/71)
17	32033241	A	T	Rrp1b	ENSMUST00000081339.12	c.-3234A>T		upstream_gene_variant	1	-	-	-	-	-	-	-	-	-	0.455 (13/27)
17	32033241	A	T	Hsf2bp	ENSMUST00000002145.11	c.199+20T>A		intron_variant	1	-	-	-	-	-	-	-	-	-	0.455 (13/27)
17	32055057	G	T	Rrp1b	ENSMUST00000081339.12	c.969-48G>T		intron_variant	1	-	-	-	-	-	-	-	-	-	0.34 (18/61)
17	32060333	T	G	Rrp1b	ENSMUST00000081339.12	c.1982-15T>G		intron_variant	1	-	-	-	-	-	-	-	-	-	0.44 (15/31)
17	32151370	A	T	Notch3	ENSMUST00000087723.3	c.2215T>A	p.Cys739Ser	missense_variant	1	-	-	-	-	-	-	-	-	-	0.5 (14/26)
17	32185237	T	G	Ephx3	ENSMUST00000087721.9	c.1028A>C	p.Asn343Thr	missense_variant	1	-	-	-	-	-	-	-	-	-	0.324 (26/87)
17	32306549	C	A	Akap8	ENSMUST00000002699.5	c.1555G>T	p.Val519Leu	missense_variant	1	-	-	-	-	-	-	-	-	-	0.337 (38/116)
17	32338850	T	G	Akap8l	ENSMUST00000050214.7	c.89-27A>C		intron_variant	1	-	-	-	-	-	-	-	-	-	0.367 (35/94)
17	32777391	G	C	Zfp871	ENSMUST00000159086.8	c.130+10C>G		intron_variant	1	-	-	-	-	-	-	-	-	-	0.15 (16/131)
17	33065657	C	A	4921501E09Rik	ENSMUST00000024121.4	c.2170G>T	p.Asp724Tyr	missense_variant	1	-	-	-	-	-	-	-	-	-	0.43 (40/91)
17	33334829	T	C	Zfp81	ENSMUST00000054072.8	c.1010A>G	p.Lys337Arg	missense_variant	1	-	-	-	-	-	-	-	-	-	0.147 (15/89)
17	33433101	C	A	Actl9	ENSMUST00000174088.2	c.134C>A	p.Pro45Gln	missense_variant	1	-	-	-	-	-	-	-	-	-	0.471 (18/39)
17	33528787	C	T	Adamts10	ENSMUST00000087623.12	c.196C>T	p.Arg66Trp	missense_variant	1	-	-	-	-	-	-	-	-	-	0.556 (22/40)
17	33528788	G	T	Adamts10	ENSMUST00000087623.12	c.197G>T	p.Arg66Leu	missense_variant	1	-	-	-	-	-	-	-	-	-	0.543 (23/40)
17	33528789	G	T	Adamts10	ENSMUST00000087623.12	c.198G>T	p.Arg66Arg	synonymous_variant	1	-	-	-	-	-	-	-	-	-	0.529 (24/41)
17	34056402	G	T	Col11a2	ENSMUST00000114255.7	c.2299G>T	p.Gly767Cys	missense_variant	1	-	-	-	-	-	-	-	-	-	0.455 (11/23)
17	34062451	G	T	Col11a2	ENSMUST00000114255.7	c.3874-7G>T		splice_region_variant&intron_variant	1	-	-	-	-	-	-	-	-	-	0.364 (17/42)
17	34113688	C	A	Brd2	ENSMUST00000025193.12	c.1717G>T	p.Gly573Trp	missense_variant	1	-	-	-	-	-	-	-	-	-	0.227 (31/129)
17	34200856	G	C	Psmb8	ENSMUST00000025196.8	c.683G>C	p.Gly228Ala	missense_variant	1	-	-	-	-	-	-	-	-	-	0.273 (20/74)
17	34200856	G	C	Tap2	ENSMUST00000025197.5	c.-4439G>C		upstream_gene_variant	1	-	-	-	-	-	-	-	-	-	0.273 (20/74)
17	34200856	G	C	Tap1	ENSMUST00000170086.7	c.*4082G>C		downstream_gene_variant	1	-	-	-	-	-	-	-	-	-	0.273 (20/74)
17	34200856	G	C	Gm20496	ENSMUST00000173770.2	n.26-599C>G		intron_variant	1	-	-	-	-	-	-	-	-	-	0.273 (20/74)
17	34334309	A	C	H2-Eb2	ENSMUST00000050325.8	c.468A>C	p.Glu156Asp	missense_variant	1	-	-	-	-	-	-	-	-	-	0.291 (26/93)
17	34492388	T	A	Btnl5-ps	ENSMUST00000097346.10	n.949A>T		non_coding_transcript_exon_variant	1	-	-	-	-	-	-	-	-	-	0.301 (67/209)
17	34540825	A	G	Btnl7-ps	ENSMUST00000023469.7	n.949T>C		splice_region_variant&non_coding_transcript_exon_variant	1	-	-	-	-	-	-	-	-	-	0.261 (27/105)
17	34718983	A	C	Tnxb	ENSMUST00000087399.4	c.11755+4A>C		splice_region_variant&intron_variant	1	-	-	-	-	-	-	-	-	-	0.244 (14/54)
17	34718983	A	C	Cyp21a2-ps	ENSMUST00000172970.1	n.*830T>G		downstream_gene_variant	1	-	-	-	-	-	-	-	-	-	0.244 (14/54)
17	34731147	A	T	C4b	ENSMUST00000069507.8	c.4148T>A	p.Leu1383Gln	missense_variant	1	-	-	-	-	-	-	-	-	-	0.514 (49/92)
17	34732144	C	A	C4b	ENSMUST00000069507.8	c.4125+26G>T		intron_variant	1	-	-	-	-	-	-	-	-	-	0.564 (23/42)
17	34819987	C	T	Stk19	ENSMUST00000077477.11	c.*4292G>A		downstream_gene_variant	1	-	-	-	-	-	-	-	-	-	0.478 (26/57)
17	34819987	C	T	C4a	ENSMUST00000160679.7	n.1215-25G>A		intron_variant	1	-	-	-	-	-	-	-	-	-	0.478 (26/57)
17	34841546	G	C	Skiv2l	ENSMUST00000046022.15	c.2470C>G	p.Arg824Gly	missense_variant&splice_region_variant	1	-	-	-	-	-	-	-	-	-	0.519 (82/152)
17	34841546	G	C	Stk19	ENSMUST00000077477.11	c.-4670C>G		upstream_gene_variant	1	-	-	-	-	-	-	-	-	-	0.519 (82/152)
17	34841546	G	C	Dxo	ENSMUST00000046244.14	c.*2409G>C		downstream_gene_variant	1	-	-	-	-	-	-	-	-	-	0.519 (82/152)
17	34841546	G	C	Mir6971	ENSMUST00000183497.1	n.*263C>G		downstream_gene_variant	1	-	-	-	-	-	-	-	-	-	0.519 (82/152)
17	34841546	G	C	Mir6970	ENSMUST00000184474.1	n.*3555C>G		downstream_gene_variant	1	-	-	-	-	-	-	-	-	-	0.519 (82/152)
17	35052459	G	T	Clic1	ENSMUST00000007257.9	c.64G>T	p.Gly22Trp	missense_variant	1	-	-	-	-	-	-	-	-	-	0.465 (24/53)
17	35052459	G	T	Gm23421	ENSMUST00000158934.2	n.*3138G>T		downstream_gene_variant	1	-	-	-	-	-	-	-	-	-	0.465 (24/53)
17	35065340	C	A	G6b	ENSMUST00000174190.1	c.473G>T	p.Gly158Val	missense_variant	1	-	-	-	-	-	-	-	-	-	0.533 (10/17)
17	35065340	C	A	Ly6g6c	ENSMUST00000173207.7	c.-96C>A		upstream_gene_variant	1	-	-	-	-	-	-	-	-	-	0.533 (10/17)
17	35065340	C	A	Ddah2	ENSMUST00000007255.12	c.*3433C>A		downstream_gene_variant	1	-	-	-	-	-	-	-	-	-	0.533 (10/17)
17	35139310	G	T	Bag6	ENSMUST00000025250.13	c.552+1G>T		splice_donor_variant&intron_variant	1	-	-	-	-	-	-	-	-	-	0.513 (51/93)
17	35159431	C	T	Gm23442	ENSMUST00000082919.1	n.*3132G>A		downstream_gene_variant	1	-	-	-	-	-	-	-	-	-	0.472 (23/46)
17	35159431	C	T	Prrc2a	ENSMUST00000025253.11	c.1285-18G>A		intron_variant	1	-	-	-	-	-	-	-	-	-	0.472 (23/46)
17	35253154	C	A	Mir8094	ENSMUST00000183361.1	n.*1749C>A		downstream_gene_variant	1	-	-	-	-	-	-	-	-	-	0.148 (8/62)
17	35253154	C	A	Ddx39b	ENSMUST00000068056.11	c.1122+46C>A		intron_variant	1	-	-	-	-	-	-	-	-	-	0.148 (8/62)
17	35345675	A	C	H2-Q2	ENSMUST00000074806.11	c.1052A>C	p.Gln351Pro	missense_variant	1	-	-	-	-	-	-	-	-	-	0.512 (185/361)
17	35427870	C	A	H2-Q6	ENSMUST00000113879.3	c.617C>A	p.Pro206Gln	missense_variant	1	-	-	-	-	-	-	-	-	-	0.237 (9/38)
17	35555575	C	T	Cdsn	ENSMUST00000044804.7	c.1000C>T	p.Leu334Leu	synonymous_variant	1	-	-	-	-	-	-	-	-	-	0.455 (17/36)
17	35555577	G	C	Cdsn	ENSMUST00000044804.7	c.1002G>C	p.Leu334Leu	synonymous_variant	1	-	-	-	-	-	-	-	-	-	0.469 (15/35)
17	35556071	T	A	Cdsn	ENSMUST00000044804.7	c.1496T>A	p.Leu499Gln	missense_variant	1	-	-	-	-	-	-	-	-	-	0.564 (27/51)
17	35664791	C	G	Vars2	ENSMUST00000043674.14	c.733G>C	p.Glu245Gln	missense_variant	1	-	-	-	-	-	-	-	-	-	0.583 (17/30)
17	35664791	C	G	Gtf2h4	ENSMUST00000001565.14	c.*3039G>C		downstream_gene_variant	1	-	-	-	-	-	-	-	-	-	0.583 (17/30)
17	35664791	C	G	Gm20483	ENSMUST00000173162.2	n.*4424C>G		downstream_gene_variant	1	-	-	-	-	-	-	-	-	-	0.583 (17/30)
17	35825823	A	C	Flot1	ENSMUST00000001569.14	c.656A>C	p.Lys219Thr	missense_variant	1	-	-	-	-	-	-	-	-	-	0.15 (8/52)
17	35825823	A	C	Ier3	ENSMUST00000003635.6	c.*3513A>C		downstream_gene_variant	1	-	-	-	-	-	-	-	-	-	0.15 (8/52)
17	35835356	T	C	Tubb5	ENSMUST00000001566.9	c.961A>G	p.Met321Val	missense_variant	1	-	-	-	-	-	-	-	-	-	0.306 (33/110)
17	35835356	T	C	Flot1	ENSMUST00000001569.14	c.*2817T>C		downstream_gene_variant	1	-	-	-	-	-	-	-	-	-	0.306 (33/110)
17	36186580	C	G	H2-T3	ENSMUST00000102675.9	c.1146G>C	p.Leu382Phe	missense_variant	1	-	-	-	-	-	-	-	-	-	0.656 (28/41)
17	36186580	C	G	Gm20495	ENSMUST00000173902.1	n.-4150G>C		upstream_gene_variant	1	-	-	-	-	-	-	-	-	-	0.656 (28/41)
17	36186582	A	T	H2-T3	ENSMUST00000102675.9	c.1144T>A	p.Leu382Met	missense_variant	1	-	-	-	-	-	-	-	-	-	0.656 (28/41)
17	36186582	A	T	Gm20495	ENSMUST00000173902.1	n.-4152T>A		upstream_gene_variant	1	-	-	-	-	-	-	-	-	-	0.656 (28/41)
17	36548770	A	C	H2-M11	ENSMUST00000041964.6	c.654A>C	p.Arg218Ser	missense_variant	1	-	-	-	-	-	-	-	-	-	0.238 (12/47)
17	36548770	A	C	Gm20453	ENSMUST00000173968.1	n.-2657T>G		upstream_gene_variant	1	-	-	-	-	-	-	-	-	-	0.238 (12/47)
17	36814208	C	A	H2-M10.6	ENSMUST00000041398.4	c.893-3C>A		splice_region_variant&intron_variant	1	-	-	-	-	-	-	-	-	-	0.488 (200/407)
17	37111288	C	G	Olfr92	ENSMUST00000168659.1	c.693G>C	p.Gly231Gly	synonymous_variant	1	-	-	-	-	-	-	-	-	-	0.321 (65/200)
17	37111288	C	G	Gm4831	ENSMUST00000174626.1	n.-2567C>G		upstream_gene_variant	1	-	-	-	-	-	-	-	-	-	0.321 (65/200)
17	37114034	T	G	Olfr92	ENSMUST00000168659.1	c.-2054A>C		upstream_gene_variant	1	-	-	-	-	-	-	-	-	-	0.235 (54/237)
17	37114034	T	G	Gm4831	ENSMUST00000174626.1	n.180T>G		non_coding_transcript_exon_variant	1	-	-	-	-	-	-	-	-	-	0.235 (54/237)
17	37279674	A	T	Olfr99	ENSMUST00000077585.2	c.745T>A	p.Tyr249Asn	missense_variant	1	-	-	-	-	-	-	-	-	-	0.525 (131/243)
17	37279674	A	T	Olfr755-ps1	ENSMUST00000173568.2	n.*1569A>T		downstream_gene_variant	1	-	-	-	-	-	-	-	-	-	0.525 (131/243)
17	37446207	AT	A	Olfr108	ENSMUST00000078207.3	c.658delT	p.Tyr220fs	frameshift_variant	1	-	-	-	-	-	-	-	-	-	0.327 (59/184)
17	37446207	AT	A	Olfr108	ENSMUST00000207414.1	c.691delT	p.Tyr231fs	frameshift_variant	1	-	-	-	-	-	-	-	-	-	0.327 (59/184)
17	37466661	T	A	Olfr109	ENSMUST00000031086.4	c.454T>A	p.Phe152Ile	missense_variant	1	-	-	-	-	-	-	-	-	-	0.287 (38/138)
17	37752767	G	T	Olfr121	ENSMUST00000074555.7	c.912G>T	p.Lys304Asn	missense_variant	1	-	-	-	-	-	-	-	-	-	0.531 (117/227)
17	38275346	A	G	Olfr138	ENSMUST00000071871.4	c.574A>G	p.Lys192Glu	missense_variant	1	-	-	-	-	-	-	-	-	-	0.108 (15/133)
17	38335352	A	C	Olfr136	ENSMUST00000077203.2	c.194A>C	p.Asn65Thr	missense_variant	1	-	-	-	-	-	-	-	-	-	0.077 (14/182)
17	42411202	T	C	Ptchd4	ENSMUST00000048691.4	c.1072+33562T>C		intron_variant	1	-	-	-	-	-	-	-	-	-	0.238 (23/98)
17	42719492	T	A	Adgrf2	ENSMUST00000113614.2	c.72+3A>T		splice_region_variant&intron_variant	1	-	-	-	-	-	-	-	-	-	0.308 (8/28)
17	43599157	G	C	Pla2g7	ENSMUST00000024706.11	c.536+15G>C		intron_variant	1	-	-	-	-	-	-	-	-	-	0.524 (92/175)
17	43602919	C	G	Pla2g7	ENSMUST00000024706.11	c.752C>G	p.Ala251Gly	missense_variant	1	-	-	-	-	-	-	-	-	-	0.15 (20/134)
17	43725577	A	C	Cyp39a1	ENSMUST00000170988.1	c.997A>C	p.Ile333Leu	missense_variant	1	-	-	-	-	-	-	-	-	-	0.289 (19/59)
17	43731046	T	A	Cyp39a1	ENSMUST00000170988.1	c.1143T>A	p.Pro381Pro	synonymous_variant	1	-	-	-	-	-	-	-	-	-	0.455 (60/144)
17	43731048	A	C	Cyp39a1	ENSMUST00000170988.1	c.1145A>C	p.Glu382Ala	missense_variant	1	-	-	-	-	-	-	-	-	-	0.438 (61/142)
17	45535071	G	T	Tcte1	ENSMUST00000113547.1	c.600G>T	p.Met200Ile	missense_variant	1	-	-	-	-	-	-	-	-	-	0.611 (13/23)
17	46220762	T	A	Xpo5	ENSMUST00000087031.5	c.1223T>A	p.Met408Lys	missense_variant&splice_region_variant	1	-	-	-	-	-	-	-	-	-	0.409 (32/82)
17	46313700	G	A	Abcc10	ENSMUST00000047970.13	c.2350C>T	p.His784Tyr	missense_variant	1	-	-	-	-	-	-	-	-	-	0.442 (22/50)
17	46405978	T	G	Zfp318	ENSMUST00000113481.7	c.3035T>G	p.Leu1012Arg	missense_variant	1	-	-	-	-	-	-	-	-	-	0.512 (24/47)
17	46405978	T	G	Gm23037	ENSMUST00000083874.1	n.*1780T>G		downstream_gene_variant	1	-	-	-	-	-	-	-	-	-	0.512 (24/47)
17	46973896	C	T	Ubr2	ENSMUST00000113335.2	c.1674+21G>A		intron_variant	1	-	-	-	-	-	-	-	-	-	0.375 (15/41)
17	47413734	T	G	1700001C19Rik	ENSMUST00000061885.8	c.461A>C	p.Asn154Thr	missense_variant	1	-	-	-	-	-	-	-	-	-	0.237 (26/111)
17	47413734	T	G	Gm5814	ENSMUST00000177586.1	c.*2994T>G		downstream_gene_variant	1	-	-	-	-	-	-	-	-	-	0.237 (26/111)
17	47728868	C	G	Pgc	ENSMUST00000024782.11	c.186C>G	p.Tyr62*	stop_gained	1	-	-	-	-	-	-	-	-	-	0.3 (18/67)
17	50169003	C	G	Rftn1	ENSMUST00000044503.13	c.145G>C	p.Ala49Pro	missense_variant&splice_region_variant	1	-	-	-	-	-	-	-	-	-	0.141 (14/81)
17	51805376	A	G	Satb1	ENSMUST00000140979.7	c.212-3T>C		splice_region_variant&intron_variant	1	-	-	-	-	-	-	-	-	-	0.25 (8/35)
17	52894061	C	A	Kcnh8	ENSMUST00000039366.10	c.1522C>A	p.Leu508Ile	missense_variant	1	-	-	-	-	-	-	-	-	-	0.597 (45/76)
17	55610655	T	A	Vmn2r118	ENSMUST00000168440.1	c.856A>T	p.Lys286*	stop_gained	1	-	-	-	-	-	-	-	-	-	0.508 (71/138)
17	55960732	T	C	Ccdc94	ENSMUST00000086869.4	c.44T>C	p.Phe15Ser	missense_variant	1	-	-	-	-	-	-	-	-	-	0.516 (81/166)
17	55960732	T	C	Gm16712	ENSMUST00000181962.1	n.-1351A>G		upstream_gene_variant	1	-	-	-	-	-	-	-	-	-	0.516 (81/166)
17	55960732	T	C	Ebi3	ENSMUST00000003274.6	c.*3955T>C		downstream_gene_variant	1	-	-	-	-	-	-	-	-	-	0.516 (81/166)
17	55972833	C	A	Shd	ENSMUST00000044216.6	c.328C>A	p.Gln110Lys	missense_variant	1	-	-	-	-	-	-	-	-	-	0.5 (16/32)
17	55972833	C	A	Ccdc94	ENSMUST00000086869.4	c.*5199C>A		downstream_gene_variant	1	-	-	-	-	-	-	-	-	-	0.5 (16/32)
17	56097016	G	T	Hdgfrp2	ENSMUST00000002911.8	c.844G>T	p.Ala282Ser	missense_variant&splice_region_variant	1	-	-	-	-	-	-	-	-	-	0.394 (16/43)
17	56097016	G	T	Plin4	ENSMUST00000002908.7	c.*4991C>A		downstream_gene_variant	1	-	-	-	-	-	-	-	-	-	0.394 (16/43)
17	56177006	G	A	Mydgf	ENSMUST00000019723.7	c.422-3C>T		splice_region_variant&intron_variant	1	-	-	-	-	-	-	-	-	-	0.286 (8/24)
17	56177006	G	A	Gm44397	ENSMUST00000195950.1	n.-4881C>T		upstream_gene_variant	1	-	-	-	-	-	-	-	-	-	0.286 (8/24)
17	56177006	G	A	Tnfaip8l1	ENSMUST00000077788.6	c.*4734G>A		downstream_gene_variant	1	-	-	-	-	-	-	-	-	-	0.286 (8/24)
17	56417050	T	A	Ptprs	ENSMUST00000067538.5	c.4942A>T	p.Ser1648Cys	missense_variant	1	-	-	-	-	-	-	-	-	-	0.4 (12/29)
17	56417050	T	A	Mir6977	ENSMUST00000184960.1	n.*1796A>T		downstream_gene_variant	1	-	-	-	-	-	-	-	-	-	0.4 (12/29)
17	56422211	C	A	Ptprs	ENSMUST00000067538.5	c.3766G>T	p.Glu1256*	stop_gained	1	-	-	-	-	-	-	-	-	-	0.579 (13/21)
17	56422211	C	A	Mir6977	ENSMUST00000184960.1	n.-3302G>T		upstream_gene_variant	1	-	-	-	-	-	-	-	-	-	0.579 (13/21)
17	56434468	G	T	Ptprs	ENSMUST00000067538.5	c.1795C>A	p.Arg599Ser	missense_variant	1	-	-	-	-	-	-	-	-	-	0.524 (15/27)
17	56608837	C	G	Rpl36	ENSMUST00000080492.5	c.-4751C>G		upstream_gene_variant	1	-	-	-	-	-	-	-	-	-	0.526 (13/22)
17	56608837	C	G	Safb	ENSMUST00000182533.7	c.*2732C>G		downstream_gene_variant	1	-	-	-	-	-	-	-	-	-	0.526 (13/22)
17	56608837	C	G	2410015M20Rik	ENSMUST00000052832.5	c.207+9G>C		intron_variant	1	-	-	-	-	-	-	-	-	-	0.526 (13/22)
17	57063609	AT	A	Slc25a23	ENSMUST00000040280.13	c.-3937delA		upstream_gene_variant	1	-	-	-	-	-	-	-	-	-	0.548 (23/39)
17	57063609	AT	A	Dennd1c	ENSMUST00000011623.7	c.*2501delA		downstream_gene_variant	1	-	-	-	-	-	-	-	-	-	0.548 (23/39)
17	57063609	AT	A	Crb3	ENSMUST00000169543.7	c.74-18delT		intron_variant	1	-	-	-	-	-	-	-	-	-	0.548 (23/39)
17	57296783	C	A	Vav1	ENSMUST00000005889.15	c.449+15C>A		intron_variant	1	-	-	-	-	-	-	-	-	-	0.593 (40/68)
17	57303853	T	C	Vav1	ENSMUST00000005889.15	c.1418T>C	p.Leu473Pro	missense_variant	1	-	-	-	-	-	-	-	-	-	0.281 (23/83)
17	57361729	T	G	Adgre1	ENSMUST00000004850.7	c.89T>G	p.Leu30Arg	missense_variant	1	-	-	-	-	-	-	-	-	-	0.357 (20/56)
17	57509236	G	T	Vmn2r120	ENSMUST00000165781.1	c.2118C>A	p.Pro706Pro	synonymous_variant	1	-	-	-	-	-	-	-	-	-	0.521 (66/129)
17	57747634	T	C	Gm25102	ENSMUST00000122479.1	n.70T>C		non_coding_transcript_exon_variant	1	-	-	-	-	-	-	-	-	-	0.215 (21/90)
17	58138589	T	G	Cntnap5c	ENSMUST00000076038.5	c.1647-24T>G		intron_variant	1	-	-	-	-	-	-	-	-	-	0.304 (58/184)
17	58410362	AT	A	Cntnap5c	ENSMUST00000076038.5	c.*21delT		downstream_gene_variant	1	-	-	-	-	-	-	-	-	-	0.467 (16/34)
17	58410362	AT	A	Cntnap5c-Gm5815	ENSMUSG00000038048-ENSMUSG00000046952	n.58410363delT		intergenic_region	1	-	-	-	-	-	-	-	-	-	0.467 (16/34)
17	58880702	G	T	Pdzph1	ENSMUST00000025064.13	c.3522C>A	p.Thr1174Thr	synonymous_variant	1	-	-	-	-	-	-	-	-	-	0.36 (22/59)
17	63225019	A	G	Fbxl17	ENSMUST00000024761.12	c.1822+6T>C		splice_region_variant&intron_variant	1	-	-	-	-	-	-	-	-	-	0.203 (27/151)
17	63490895	T	C	Fbxl17	ENSMUST00000024761.12	c.994-8A>G		splice_region_variant&intron_variant	1	-	-	-	-	-	-	-	-	-	0.192 (11/60)
17	63981494	G	C	Fer	ENSMUST00000000129.12	c.1344G>C	p.Val448Val	synonymous_variant	1	-	-	-	-	-	-	-	-	-	0.262 (15/51)
17	64292869	C	A	Pja2	ENSMUST00000024888.14	c.1619G>T	p.Ser540Ile	missense_variant	1	-	-	-	-	-	-	-	-	-	0.5 (25/49)
17	64675047	G	T	Man2a1	ENSMUST00000086723.9	c.1575-18G>T		intron_variant	1	-	-	-	-	-	-	-	-	-	0.475 (26/53)
17	65970338	C	A	Ankrd12	ENSMUST00000038116.11	c.5941-1G>T		splice_acceptor_variant&intron_variant	1	-	-	-	-	-	-	-	-	-	0.457 (18/39)
17	65982832	T	G	Ankrd12	ENSMUST00000038116.11	c.5601+4A>C		splice_region_variant&intron_variant	1	-	-	-	-	-	-	-	-	-	0.178 (10/51)
17	67632436	C	T	Lrrc30	ENSMUST00000097290.2	c.148G>A	p.Val50Ile	missense_variant	1	-	-	-	-	-	-	-	-	-	0.319 (20/54)
17	68425687	G	T	L3mbtl4	ENSMUST00000093007.5	c.161G>T	p.Trp54Leu	missense_variant	1	-	-	-	-	-	-	-	-	-	0.395 (23/58)
17	69248728	T	A	Epb41l3	ENSMUST00000112680.7	c.936+11T>A		intron_variant	1	-	-	-	-	-	-	-	-	-	0.219 (8/36)
17	70815209	C	T	Dlgap1	ENSMUST00000155016.7	c.2632C>T	p.Pro878Ser	missense_variant	1	-	-	-	-	-	-	-	-	-	0.456 (37/81)
17	71122498	A	C	Myom1	ENSMUST00000073211.11	c.4655-59A>C		intron_variant	1	-	-	-	-	-	-	-	-	-	0.405 (38/97)
17	71122498	A	C	Gm26561	ENSMUST00000180743.1	n.184+17893A>C		intron_variant	1	-	-	-	-	-	-	-	-	-	0.405 (38/97)
17	71361841	C	A	Smchd1	ENSMUST00000127430.1	c.5178G>T	p.Lys1726Asn	missense_variant&splice_region_variant	1	-	-	-	-	-	-	-	-	-	0.528 (54/109)
17	71361841	C	A	Gm37639	ENSMUST00000191623.1	n.*4211G>T		downstream_gene_variant	1	-	-	-	-	-	-	-	-	-	0.528 (54/109)
17	71361841	C	A	Gm26561	ENSMUST00000180743.1	n.185-30215C>A		intron_variant	1	-	-	-	-	-	-	-	-	-	0.528 (54/109)
17	71700470	C	A	Fam179a	ENSMUST00000144479.1	c.1048-35C>A		intron_variant	1	-	-	-	-	-	-	-	-	-	0.534 (39/74)
17	71752642	G	A	BC027072	ENSMUST00000057405.7	c.39C>T	p.Ser13Ser	synonymous_variant	1	-	-	-	-	-	-	-	-	-	0.508 (38/73)
17	71895774	C	T	Alk	ENSMUST00000086639.4	c.3465G>A	p.Thr1155Thr	splice_region_variant&synonymous_variant	1	-	-	-	-	-	-	-	-	-	0.467 (40/85)
17	73341110	G	T	Capn13	ENSMUST00000095208.3	c.894C>A	p.Ser298Arg	missense_variant	1	-	-	-	-	-	-	-	-	-	0.348 (53/145)
17	73916778	C	A	Xdh	ENSMUST00000024866.4	c.1608+10G>T		intron_variant	1	-	-	-	-	-	-	-	-	-	0.529 (10/20)
17	73923042	C	A	Xdh	ENSMUST00000024866.4	c.892+1G>T		splice_donor_variant&intron_variant	1	-	-	-	-	-	-	-	-	-	0.514 (22/45)
17	74017662	G	T	Srd5a2	ENSMUST00000043458.7	c.*44C>A		downstream_gene_variant	1	-	-	-	-	-	-	-	-	-	0.594 (70/122)
17	74017662	G	T	Gm24475-Srd5a2	ENSMUSG00000088060-ENSMUSG00000038541	n.74017662G>T		intergenic_region	1	-	-	-	-	-	-	-	-	-	0.594 (70/122)
17	74498331	G	C	Yipf4	ENSMUST00000024873.6	c.512G>C	p.Gly171Ala	missense_variant	1	-	-	-	-	-	-	-	-	-	0.396 (123/299)
17	74579379	C	T	Birc6	ENSMUST00000182597.7	c.1701C>T	p.Phe567Phe	synonymous_variant	1	-	-	-	-	-	-	-	-	-	0.252 (36/133)
17	74579379	C	T	Gm26749	ENSMUST00000181387.1	n.1734-3799G>A		intron_variant	1	-	-	-	-	-	-	-	-	-	0.252 (36/133)
17	78493275	A	C	Gm10093	ENSMUST00000079363.4	c.*245A>C		3_prime_UTR_variant	1	-	-	-	-	-	-	-	-	-	0.137 (10/66)
17	80241966	C	G	Dhx57	ENSMUST00000086555.9	c.4009G>C	p.Ala1337Pro	missense_variant	1	-	-	-	-	-	-	-	-	-	0.214 (8/34)
17	80245805	T	G	Dhx57	ENSMUST00000086555.9	c.3692A>C	p.Lys1231Thr	missense_variant	1	-	-	-	-	-	-	-	-	-	0.302 (21/72)
17	80618337	C	G	Map4k3	ENSMUST00000112389.8	c.1228G>C	p.Ala410Pro	missense_variant	1	-	-	-	-	-	-	-	-	-	0.263 (55/219)
17	83445965	G	C	Eml4	ENSMUST00000096766.10	c.1064G>C	p.Arg355Thr	missense_variant	1	-	-	-	-	-	-	-	-	-	0.447 (88/198)
17	83818466	G	T	Mta3	ENSMUST00000067826.14	c.*3805G>T		downstream_gene_variant&intragenic_variant	1	-	-	-	-	-	-	-	-	-	0.632 (46/72)
17	84444430	A	C	Thada	ENSMUST00000047524.8	c.1117T>G	p.Ser373Ala	missense_variant	1	-	-	-	-	-	-	-	-	-	0.151 (13/89)
17	84770431	C	G	Lrpprc	ENSMUST00000112308.8	c.1075G>C	p.Ala359Pro	missense_variant	1	-	-	-	-	-	-	-	-	-	0.235 (24/105)
17	84994265	G	T	Ppm1b	ENSMUST00000080217.12	c.572G>T	p.Arg191Leu	missense_variant	1	-	-	-	-	-	-	-	-	-	0.441 (66/145)
17	85046578	C	A	Slc3a1	ENSMUST00000024944.7	c.889-61C>A		intron_variant	1	-	-	-	-	-	-	-	-	-	0.604 (33/54)
17	85621521	C	A	Six3	ENSMUST00000162695.2	c.282C>A	p.Ala94Ala	synonymous_variant	1	-	-	-	-	-	-	-	-	-	0.5 (8/18)
17	85621521	C	A	Six3os1	ENSMUST00000177220.7	n.-3123G>T		upstream_gene_variant	1	-	-	-	-	-	-	-	-	-	0.5 (8/18)
17	85621521	C	A	Gm28528	ENSMUST00000188560.1	n.-520G>T		upstream_gene_variant	1	-	-	-	-	-	-	-	-	-	0.5 (8/18)
17	85621521	C	A	Gm27275	ENSMUST00000184318.1	n.*4548C>A		downstream_gene_variant	1	-	-	-	-	-	-	-	-	-	0.5 (8/18)
17	85621521	C	A	Gm27502	ENSMUST00000183495.1	n.*3256C>A		downstream_gene_variant	1	-	-	-	-	-	-	-	-	-	0.5 (8/18)
17	85621521	C	A	Gm27427	ENSMUST00000185134.1	n.*2104C>A		downstream_gene_variant	1	-	-	-	-	-	-	-	-	-	0.5 (8/18)
17	85685456	A	T	Six2	ENSMUST00000024947.7	c.618T>A	p.Asn206Lys	missense_variant	1	-	-	-	-	-	-	-	-	-	0.575 (29/49)
17	86001617	A	C	Srbd1	ENSMUST00000095187.3	c.2142-10T>G		intron_variant	1	-	-	-	-	-	-	-	-	-	0.381 (10/24)
17	86827946	C	T	Epas1	ENSMUST00000024954.9	c.2006C>T	p.Ser669Leu	missense_variant	1	-	-	-	-	-	-	-	-	-	0.643 (13/19)
17	89046667	C	G	Fshr	ENSMUST00000035701.4	c.262G>C	p.Ala88Pro	missense_variant	1	-	-	-	-	-	-	-	-	-	0.314 (28/89)
17	94733563	T	G	Mettl4	ENSMUST00000171284.1	c.1162A>C	p.Thr388Pro	missense_variant	1	-	-	-	-	-	-	-	-	-	0.294 (44/160)
18	3267730	T	A	Crem	ENSMUST00000150235.7	c.932A>T	p.Glu311Val	missense_variant&splice_region_variant	1	-	-	-	-	-	-	-	-	-	0.4 (23/53)
18	5099595	G	T	Svil	ENSMUST00000210707.1	c.5391G>T	p.Val1797Val	synonymous_variant	1	-	-	-	-	-	-	-	-	-	0.37 (12/30)
18	7129487	G	C	Armc4	ENSMUST00000081275.4	c.2690C>G	p.Ala897Gly	missense_variant	1	-	-	-	-	-	-	-	-	-	0.408 (22/55)
18	7216973	C	A	Armc4	ENSMUST00000081275.4	c.2038G>T	p.Glu680*	stop_gained	1	-	-	-	-	-	-	-	-	-	0.25 (9/43)
18	10515305	G	C	Greb1l	ENSMUST00000048977.14	c.2096G>C	p.Gly699Ala	missense_variant	1	-	-	-	-	-	-	-	-	-	0.361 (16/44)
18	11732262	G	A	Rbbp8	ENSMUST00000047322.6	c.2207G>A	p.Cys736Tyr	missense_variant	1	-	-	-	-	-	-	-	-	-	0.386 (29/73)
18	13715163	A	C	Zfp521	ENSMUST00000025288.7	c.3884T>G	p.Phe1295Cys	missense_variant	1	-	-	-	-	-	-	-	-	-	0.329 (29/90)
18	14570213	C	T	Gm6457	ENSMUST00000066378.7	n.113C>T		non_coding_transcript_exon_variant	1	-	-	-	-	-	-	-	-	-	0.102 (11/111)
18	20097128	T	A	Dsc1	ENSMUST00000038710.5	c.1074+45A>T		intron_variant	1	-	-	-	-	-	-	-	-	-	0.081 (8/101)
18	20283573	G	T	Dsg1c	ENSMUST00000054128.6	c.2530G>T	p.Gly844Cys	missense_variant	1	-	-	-	-	-	-	-	-	-	0.343 (70/208)
18	20580621	C	A	Dsg2	ENSMUST00000059787.14	c.648C>A	p.Phe216Leu	missense_variant	1	-	-	-	-	-	-	-	-	-	0.448 (15/33)
18	20692372	A	G	B4galt6	ENSMUST00000070080.5	c.776+20T>C		intron_variant	1	-	-	-	-	-	-	-	-	-	0.438 (9/18)
18	21077059	C	A	Mep1b	ENSMUST00000082235.4	c.174+672C>A		intron_variant	1	-	-	-	-	-	-	-	-	-	0.395 (36/91)
18	21077059	C	A	Gm6378	ENSMUST00000084199.3	n.52G>T		non_coding_transcript_exon_variant	1	-	-	-	-	-	-	-	-	-	0.395 (36/91)
18	21148325	G	A	Garem	ENSMUST00000049260.6	c.973C>T	p.His325Tyr	missense_variant	1	-	-	-	-	-	-	-	-	-	0.209 (12/52)
18	21552687	C	A	Klhl14	ENSMUST00000049105.10	c.1753-45G>T		intron_variant	1	-	-	-	-	-	-	-	-	-	0.435 (10/25)
18	22434615	G	T	Asxl3	ENSMUST00000097655.3	c.249G>T	p.Thr83Thr	synonymous_variant	1	-	-	-	-	-	-	-	-	-	0.273 (13/44)
18	22522220	G	T	Asxl3	ENSMUST00000097655.3	c.3286G>T	p.Gly1096Cys	missense_variant	1	-	-	-	-	-	-	-	-	-	0.381 (9/25)
18	24670633	A	T	Mocos	ENSMUST00000068006.7	c.1010A>T	p.His337Leu	missense_variant	1	-	-	-	-	-	-	-	-	-	0.261 (26/105)
18	34809069	G	T	Kdm3b	ENSMUST00000043775.7	c.2212G>T	p.Glu738*	stop_gained	1	-	-	-	-	-	-	-	-	-	0.256 (11/47)
18	36670009	G	T	Eif4ebp3	ENSMUST00000036765.7	c.*4390G>T		downstream_gene_variant	1	-	-	-	-	-	-	-	-	-	0.36 (11/30)
18	36670009	G	T	Sra1	ENSMUST00000001415.7	c.*1430C>A		downstream_gene_variant&intragenic_variant	1	-	-	-	-	-	-	-	-	-	0.36 (11/30)
18	36682763	G	T	Slc35a4	ENSMUST00000036158.6	c.645G>T	p.Leu215Phe	missense_variant	1	-	-	-	-	-	-	-	-	-	0.257 (9/35)
18	36682763	G	T	Sra1	ENSMUST00000001415.7	c.-3718C>A		upstream_gene_variant	1	-	-	-	-	-	-	-	-	-	0.257 (9/35)
18	36682763	G	T	E230025N22Rik	ENSMUST00000115682.1	c.*2563C>A		downstream_gene_variant	1	-	-	-	-	-	-	-	-	-	0.257 (9/35)
18	36695824	T	A	E230025N22Rik	ENSMUST00000115682.1	c.-63A>T		5_prime_UTR_premature_start_codon_gain_variant&5_prime_UTR_variant	1	-	-	-	-	-	-	-	-	-	0.206 (9/39)
18	36753515	G	T	Ik	ENSMUST00000007042.5	c.1039G>T	p.Asp347Tyr	missense_variant	1	-	-	-	-	-	-	-	-	-	0.329 (30/99)
18	36920938	A	T	Gm6756	ENSMUST00000180647.1	n.543A>T		non_coding_transcript_exon_variant	1	-	-	-	-	-	-	-	-	-	0.303 (36/117)
18	36975534	G	C	Pcdha7	ENSMUST00000192631.1	c.1611G>C	p.Ala537Ala	synonymous_variant	1	-	-	-	-	-	-	-	-	-	0.289 (69/238)
18	36975534	G	C	Gm37388	ENSMUST00000193984.1	c.-409G>C		upstream_gene_variant	1	-	-	-	-	-	-	-	-	-	0.289 (69/238)
18	36975534	G	C	Gm36858	ENSMUST00000194501.1	n.-4523G>C		upstream_gene_variant	1	-	-	-	-	-	-	-	-	-	0.289 (69/238)
18	36975534	G	C	Pcdha1	ENSMUST00000070797.6	c.2388+42862G>C		intron_variant	1	-	-	-	-	-	-	-	-	-	0.289 (69/238)
18	36975534	G	C	Pcdha2	ENSMUST00000115662.8	c.2388+33829G>C		intron_variant	1	-	-	-	-	-	-	-	-	-	0.289 (69/238)
18	36975534	G	C	Pcdha3	ENSMUST00000192503.1	c.2370+26958G>C		intron_variant	1	-	-	-	-	-	-	-	-	-	0.289 (69/238)
18	36975534	G	C	Pcdha4	ENSMUST00000192512.5	c.2385+20384G>C		intron_variant	1	-	-	-	-	-	-	-	-	-	0.289 (69/238)
18	36975534	G	C	Pcdha5	ENSMUST00000192168.1	c.2346+12749G>C		intron_variant	1	-	-	-	-	-	-	-	-	-	0.289 (69/238)
18	36975534	G	C	Pcdha6	ENSMUST00000193777.5	c.2382+5397G>C		intron_variant	1	-	-	-	-	-	-	-	-	-	0.289 (69/238)
18	36975534	G	C	Gm42416	ENSMUST00000115661.4	c.2385+20384G>C		intron_variant	1	-	-	-	-	-	-	-	-	-	0.289 (69/238)
18	36975534	G	C	Gm37013	ENSMUST00000194544.1	c.222+5397G>C		intron_variant	1	-	-	-	-	-	-	-	-	-	0.289 (69/238)
18	36975840	G	C	Pcdha7	ENSMUST00000192631.1	c.1917G>C	p.Glu639Asp	missense_variant	1	-	-	-	-	-	-	-	-	-	0.31 (26/82)
18	36975840	G	C	Gm37388	ENSMUST00000193984.1	c.-103G>C		upstream_gene_variant	1	-	-	-	-	-	-	-	-	-	0.31 (26/82)
18	36975840	G	C	Gm36858	ENSMUST00000194501.1	n.-4217G>C		upstream_gene_variant	1	-	-	-	-	-	-	-	-	-	0.31 (26/82)
18	36975840	G	C	Pcdha1	ENSMUST00000070797.6	c.2388+43168G>C		intron_variant	1	-	-	-	-	-	-	-	-	-	0.31 (26/82)
18	36975840	G	C	Pcdha2	ENSMUST00000115662.8	c.2388+34135G>C		intron_variant	1	-	-	-	-	-	-	-	-	-	0.31 (26/82)
18	36975840	G	C	Pcdha3	ENSMUST00000192503.1	c.2370+27264G>C		intron_variant	1	-	-	-	-	-	-	-	-	-	0.31 (26/82)
18	36975840	G	C	Pcdha4	ENSMUST00000192512.5	c.2385+20690G>C		intron_variant	1	-	-	-	-	-	-	-	-	-	0.31 (26/82)
18	36975840	G	C	Pcdha5	ENSMUST00000192168.1	c.2346+13055G>C		intron_variant	1	-	-	-	-	-	-	-	-	-	0.31 (26/82)
18	36975840	G	C	Pcdha6	ENSMUST00000193777.5	c.2382+5703G>C		intron_variant	1	-	-	-	-	-	-	-	-	-	0.31 (26/82)
18	36975840	G	C	Gm42416	ENSMUST00000115661.4	c.2385+20690G>C		intron_variant	1	-	-	-	-	-	-	-	-	-	0.31 (26/82)
18	36975840	G	C	Gm37013	ENSMUST00000194544.1	c.222+5703G>C		intron_variant	1	-	-	-	-	-	-	-	-	-	0.31 (26/82)
18	36993561	G	A	Pcdha8	ENSMUST00000194038.1	c.1095G>A	p.Leu365Leu	synonymous_variant	1	-	-	-	-	-	-	-	-	-	0.317 (43/134)
18	36993561	G	A	Pcdha9	ENSMUST00000115659.5	c.-4319G>A		upstream_gene_variant	1	-	-	-	-	-	-	-	-	-	0.317 (43/134)
18	36993561	G	A	Gm36858	ENSMUST00000194501.1	n.*3986G>A		downstream_gene_variant	1	-	-	-	-	-	-	-	-	-	0.317 (43/134)
18	36993561	G	A	Pcdha1	ENSMUST00000070797.6	c.2388+60889G>A		intron_variant	1	-	-	-	-	-	-	-	-	-	0.317 (43/134)
18	36993561	G	A	Pcdha2	ENSMUST00000115662.8	c.2388+51856G>A		intron_variant	1	-	-	-	-	-	-	-	-	-	0.317 (43/134)
18	36993561	G	A	Pcdha3	ENSMUST00000192503.1	c.2370+44985G>A		intron_variant	1	-	-	-	-	-	-	-	-	-	0.317 (43/134)
18	36993561	G	A	Pcdha4	ENSMUST00000192512.5	c.2385+38411G>A		intron_variant	1	-	-	-	-	-	-	-	-	-	0.317 (43/134)
18	36993561	G	A	Pcdha5	ENSMUST00000192168.1	c.2346+30776G>A		intron_variant	1	-	-	-	-	-	-	-	-	-	0.317 (43/134)
18	36993561	G	A	Pcdha6	ENSMUST00000193777.5	c.2382+23424G>A		intron_variant	1	-	-	-	-	-	-	-	-	-	0.317 (43/134)
18	36993561	G	A	Pcdha7	ENSMUST00000192631.1	c.2355+17283G>A		intron_variant	1	-	-	-	-	-	-	-	-	-	0.317 (43/134)
18	36993561	G	A	Gm42416	ENSMUST00000115661.4	c.2385+38411G>A		intron_variant	1	-	-	-	-	-	-	-	-	-	0.317 (43/134)
18	36993561	G	A	Gm37013	ENSMUST00000194544.1	c.222+23424G>A		intron_variant	1	-	-	-	-	-	-	-	-	-	0.317 (43/134)
18	36993561	G	A	Gm37388	ENSMUST00000193984.1	c.336+17283G>A		intron_variant	1	-	-	-	-	-	-	-	-	-	0.317 (43/134)
18	37007179	C	T	Pcdha11	ENSMUST00000115658.5	c.1860C>T	p.Arg620Arg	synonymous_variant	1	-	-	-	-	-	-	-	-	-	0.295 (25/86)
18	37007179	C	T	Pcdha11	ENSMUST00000115657.9	c.-3679C>T		upstream_gene_variant	1	-	-	-	-	-	-	-	-	-	0.295 (25/86)
18	37007179	C	T	Gm10545	ENSMUST00000097612.3	n.*1689G>A		downstream_gene_variant	1	-	-	-	-	-	-	-	-	-	0.295 (25/86)
18	37007179	C	T	Pcdha1	ENSMUST00000070797.6	c.2388+74507C>T		intron_variant	1	-	-	-	-	-	-	-	-	-	0.295 (25/86)
18	37007179	C	T	Pcdha2	ENSMUST00000115662.8	c.2388+65474C>T		intron_variant	1	-	-	-	-	-	-	-	-	-	0.295 (25/86)
18	37007179	C	T	Pcdha3	ENSMUST00000192503.1	c.2370+58603C>T		intron_variant	1	-	-	-	-	-	-	-	-	-	0.295 (25/86)
18	37007179	C	T	Pcdha4	ENSMUST00000192512.5	c.2385+52029C>T		intron_variant	1	-	-	-	-	-	-	-	-	-	0.295 (25/86)
18	37007179	C	T	Pcdha5	ENSMUST00000192168.1	c.2346+44394C>T		intron_variant	1	-	-	-	-	-	-	-	-	-	0.295 (25/86)
18	37007179	C	T	Pcdha6	ENSMUST00000193777.5	c.2382+37042C>T		intron_variant	1	-	-	-	-	-	-	-	-	-	0.295 (25/86)
18	37007179	C	T	Pcdha7	ENSMUST00000192631.1	c.2355+30901C>T		intron_variant	1	-	-	-	-	-	-	-	-	-	0.295 (25/86)
18	37007179	C	T	Pcdha8	ENSMUST00000194038.1	c.2382+12331C>T		intron_variant	1	-	-	-	-	-	-	-	-	-	0.295 (25/86)
18	37007179	C	T	Pcdha9	ENSMUST00000115659.5	c.2481+6819C>T		intron_variant	1	-	-	-	-	-	-	-	-	-	0.295 (25/86)
18	37007179	C	T	Gm42416	ENSMUST00000115661.4	c.2385+52029C>T		intron_variant	1	-	-	-	-	-	-	-	-	-	0.295 (25/86)
18	37007179	C	T	Gm37013	ENSMUST00000194544.1	c.222+37042C>T		intron_variant	1	-	-	-	-	-	-	-	-	-	0.295 (25/86)
18	37007179	C	T	Gm37388	ENSMUST00000193984.1	c.336+30901C>T		intron_variant	1	-	-	-	-	-	-	-	-	-	0.295 (25/86)
18	37296634	G	T	Pcdhb2	ENSMUST00000056522.4	c.1659G>T	p.Val553Val	synonymous_variant	1	-	-	-	-	-	-	-	-	-	0.203 (17/84)
18	37296634	G	T	Pcdhb3	ENSMUST00000051754.1	c.-4349G>T		upstream_gene_variant	1	-	-	-	-	-	-	-	-	-	0.203 (17/84)
18	37296634	G	T	Gm42416	ENSMUST00000115661.4	c.2385+341484G>T		intron_variant	1	-	-	-	-	-	-	-	-	-	0.203 (17/84)
18	37296634	G	T	Gm37013	ENSMUST00000194544.1	c.222+326497G>T		intron_variant	1	-	-	-	-	-	-	-	-	-	0.203 (17/84)
18	37296634	G	T	Gm37388	ENSMUST00000193984.1	c.336+320356G>T		intron_variant	1	-	-	-	-	-	-	-	-	-	0.203 (17/84)
18	37413395	AC	A	Pcdhb10	ENSMUST00000051126.3	c.1524delC	p.Asp508fs	frameshift_variant	1	-	-	-	-	-	-	-	-	-	0.309 (27/89)
18	37413395	AC	A	Gm42416	ENSMUST00000115661.4	c.2386-411625delC		intron_variant	1	-	-	-	-	-	-	-	-	-	0.309 (27/89)
18	37413395	AC	A	Gm37013	ENSMUST00000194544.1	c.223-411625delC		intron_variant	1	-	-	-	-	-	-	-	-	-	0.309 (27/89)
18	37413395	AC	A	Gm37388	ENSMUST00000193984.1	c.337-411625delC		intron_variant	1	-	-	-	-	-	-	-	-	-	0.309 (27/89)
18	37443235	C	A	Pcdhb13	ENSMUST00000056915.2	c.665C>A	p.Ser222*	stop_gained	1	-	-	-	-	-	-	-	-	-	0.41 (18/44)
18	37443235	C	A	Pcdhb14	ENSMUST00000052387.4	c.-4608C>A		upstream_gene_variant	1	-	-	-	-	-	-	-	-	-	0.41 (18/44)
18	37443235	C	A	Pcdhb12	ENSMUST00000055495.5	c.*5063C>A		downstream_gene_variant	1	-	-	-	-	-	-	-	-	-	0.41 (18/44)
18	37443235	C	A	Gm42416	ENSMUST00000115661.4	c.2386-381786C>A		intron_variant	1	-	-	-	-	-	-	-	-	-	0.41 (18/44)
18	37443235	C	A	Gm37013	ENSMUST00000194544.1	c.223-381786C>A		intron_variant	1	-	-	-	-	-	-	-	-	-	0.41 (18/44)
18	37443235	C	A	Gm37388	ENSMUST00000193984.1	c.337-381786C>A		intron_variant	1	-	-	-	-	-	-	-	-	-	0.41 (18/44)
18	37479160	C	A	Pcdhb16	ENSMUST00000051442.6	c.1172C>A	p.Pro391His	missense_variant	1	-	-	-	-	-	-	-	-	-	0.22 (34/148)
18	37479160	C	A	Pcdhb15	ENSMUST00000050034.2	c.*3083C>A		downstream_gene_variant	1	-	-	-	-	-	-	-	-	-	0.22 (34/148)
18	37479160	C	A	Gm42416	ENSMUST00000115661.4	c.2386-345861C>A		intron_variant	1	-	-	-	-	-	-	-	-	-	0.22 (34/148)
18	37479160	C	A	Gm37013	ENSMUST00000194544.1	c.223-345861C>A		intron_variant	1	-	-	-	-	-	-	-	-	-	0.22 (34/148)
18	37479160	C	A	Gm37388	ENSMUST00000193984.1	c.337-345861C>A		intron_variant	1	-	-	-	-	-	-	-	-	-	0.22 (34/148)
18	37491717	C	A	Pcdhb18	ENSMUST00000055949.3	c.2099C>A	p.Ser700Tyr	missense_variant	1	-	-	-	-	-	-	-	-	-	0.193 (42/220)
18	37491717	C	A	Pcdhb17	ENSMUST00000053856.5	c.*4159C>A		downstream_gene_variant	1	-	-	-	-	-	-	-	-	-	0.193 (42/220)
18	37491717	C	A	Gm42416	ENSMUST00000115661.4	c.2386-333304C>A		intron_variant	1	-	-	-	-	-	-	-	-	-	0.193 (42/220)
18	37491717	C	A	Gm37013	ENSMUST00000194544.1	c.223-333304C>A		intron_variant	1	-	-	-	-	-	-	-	-	-	0.193 (42/220)
18	37491717	C	A	Gm37388	ENSMUST00000193984.1	c.337-333304C>A		intron_variant	1	-	-	-	-	-	-	-	-	-	0.193 (42/220)
18	37681840	A	T	Pcdhgb1	ENSMUST00000192931.1	c.1383A>T	p.Gln461His	missense_variant	1	-	-	-	-	-	-	-	-	-	0.343 (54/164)
18	37681840	A	T	Pcdhga4	ENSMUST00000194418.1	c.-3560A>T		upstream_gene_variant	1	-	-	-	-	-	-	-	-	-	0.343 (54/164)
18	37681840	A	T	Pcdhga1	ENSMUST00000194190.1	c.2421+17475A>T		intron_variant	1	-	-	-	-	-	-	-	-	-	0.343 (54/164)
18	37681840	A	T	Pcdhga2	ENSMUST00000193869.1	c.2421+10315A>T		intron_variant	1	-	-	-	-	-	-	-	-	-	0.343 (54/164)
18	37681840	A	T	Pcdhga3	ENSMUST00000073447.7	c.2412+4933A>T		intron_variant	1	-	-	-	-	-	-	-	-	-	0.343 (54/164)
18	37681840	A	T	Gm42416	ENSMUST00000115661.4	c.2386-143181A>T		intron_variant	1	-	-	-	-	-	-	-	-	-	0.343 (54/164)
18	37681840	A	T	Gm37013	ENSMUST00000194544.1	c.223-143181A>T		intron_variant	1	-	-	-	-	-	-	-	-	-	0.343 (54/164)
18	37681840	A	T	Gm37388	ENSMUST00000193984.1	c.337-143181A>T		intron_variant	1	-	-	-	-	-	-	-	-	-	0.343 (54/164)
18	37687196	G	A	Pcdhga4	ENSMUST00000194418.1	c.1797G>A	p.Gln599Gln	synonymous_variant	1	-	-	-	-	-	-	-	-	-	0.282 (28/108)
18	37687196	G	A	Pcdhgb2	ENSMUST00000195112.1	c.-2762G>A		upstream_gene_variant	1	-	-	-	-	-	-	-	-	-	0.282 (28/108)
18	37687196	G	A	Pcdhga1	ENSMUST00000194190.1	c.2421+22831G>A		intron_variant	1	-	-	-	-	-	-	-	-	-	0.282 (28/108)
18	37687196	G	A	Pcdhga2	ENSMUST00000193869.1	c.2421+15671G>A		intron_variant	1	-	-	-	-	-	-	-	-	-	0.282 (28/108)
18	37687196	G	A	Pcdhga3	ENSMUST00000073447.7	c.2412+10289G>A		intron_variant	1	-	-	-	-	-	-	-	-	-	0.282 (28/108)
18	37687196	G	A	Pcdhgb1	ENSMUST00000192931.1	c.2382+4357G>A		intron_variant	1	-	-	-	-	-	-	-	-	-	0.282 (28/108)
18	37687196	G	A	Gm42416	ENSMUST00000115661.4	c.2386-137825G>A		intron_variant	1	-	-	-	-	-	-	-	-	-	0.282 (28/108)
18	37687196	G	A	Gm37013	ENSMUST00000194544.1	c.223-137825G>A		intron_variant	1	-	-	-	-	-	-	-	-	-	0.282 (28/108)
18	37687196	G	A	Gm37388	ENSMUST00000193984.1	c.337-137825G>A		intron_variant	1	-	-	-	-	-	-	-	-	-	0.282 (28/108)
18	38245024	G	T	1700086O06Rik	ENSMUST00000181871.1	n.486-4071C>A		intron_variant	1	-	-	-	-	-	-	-	-	-	0.261 (34/140)
18	38245024	G	T	Gm10268	ENSMUST00000085340.6	n.197G>T		non_coding_transcript_exon_variant	1	-	-	-	-	-	-	-	-	-	0.261 (34/140)
18	42252508	C	A	Lars	ENSMUST00000097590.3	c.132-1128G>T		intron_variant	1	-	-	-	-	-	-	-	-	-	0.547 (118/218)
18	42252508	C	A	Rps19-ps4	ENSMUST00000091925.5	n.111C>A		non_coding_transcript_exon_variant	1	-	-	-	-	-	-	-	-	-	0.547 (118/218)
18	42333234	TG	T	Rbm27	ENSMUST00000091920.5	c.2664delG	p.Arg889fs	frameshift_variant	1	-	-	-	-	-	-	-	-	-	0.511 (34/66)
18	43766852	T	C	Scgb3a2	ENSMUST00000043803.12	c.204T>C	p.Cys68Cys	synonymous_variant	1	-	-	-	-	-	-	-	-	-	0.561 (83/146)
18	44346085	G	T	Myot	ENSMUST00000025349.11	c.888G>T	p.Met296Ile	missense_variant	1	-	-	-	-	-	-	-	-	-	0.532 (35/62)
18	44395853	G	T	Dcp2	ENSMUST00000025350.9	c.54-20G>T		intron_variant	1	-	-	-	-	-	-	-	-	-	0.083 (12/162)
18	45561324	AG	A	Kcnn2	ENSMUST00000066890.13	c.1362+10delG		intron_variant	1	-	-	-	-	-	-	-	-	-	0.327 (37/114)
18	47270703	C	T	Sema6a	ENSMUST00000135790.7	c.1851G>A	p.Arg617Arg	synonymous_variant	1	-	-	-	-	-	-	-	-	-	0.524 (12/24)
18	50281584	C	A	Fam170a	ENSMUST00000039121.2	c.296C>A	p.Ala99Asp	missense_variant	1	-	-	-	-	-	-	-	-	-	0.29 (9/36)
18	50281852	A	G	Fam170a	ENSMUST00000039121.2	c.564A>G	p.Lys188Lys	synonymous_variant	1	-	-	-	-	-	-	-	-	-	0.355 (12/36)
18	52520834	T	G	Lox	ENSMUST00000025409.7	c.1189A>C	p.Thr397Pro	missense_variant	1	-	-	-	-	-	-	-	-	-	0.271 (23/87)
18	52694547	A	G	Gykl1	ENSMUST00000066193.3	c.826A>G	p.Lys276Glu	missense_variant	1	-	-	-	-	-	-	-	-	-	0.385 (47/122)
18	53703292	T	A	Cep120	ENSMUST00000049811.6	c.2368-48A>T		intron_variant	1	-	-	-	-	-	-	-	-	-	0.366 (30/87)
18	56586952	G	T	Phax	ENSMUST00000008445.6	c.964G>T	p.Gly322Trp	missense_variant	1	-	-	-	-	-	-	-	-	-	0.216 (10/42)
18	56586952	G	T	Tex43	ENSMUST00000035640.12	c.-1412G>T		upstream_gene_variant	1	-	-	-	-	-	-	-	-	-	0.216 (10/42)
18	57277694	C	G	Megf10	ENSMUST00000075770.12	c.2074C>G	p.Pro692Ala	missense_variant	1	-	-	-	-	-	-	-	-	-	0.449 (26/60)
18	57287743	C	A	Megf10	ENSMUST00000075770.12	c.2492-40C>A		intron_variant	1	-	-	-	-	-	-	-	-	-	0.5 (9/21)
18	58203737	G	A	Fbn2	ENSMUST00000025497.6	c.436+9C>T		intron_variant	1	-	-	-	-	-	-	-	-	-	0.306 (14/44)
18	61587415	T	A	Csnk1a1	ENSMUST00000166990.7	c.*2086T>A		downstream_gene_variant&intragenic_variant	1	-	-	-	-	-	-	-	-	-	0.132 (23/141)
18	61697303	T	A	Pcyox1l	ENSMUST00000025472.6	c.*9A>T		3_prime_UTR_variant	1	-	-	-	-	-	-	-	-	-	0.286 (10/36)
18	61697303	T	A	Gm38165	ENSMUST00000191654.1	n.-4919A>T		upstream_gene_variant	1	-	-	-	-	-	-	-	-	-	0.286 (10/36)
18	61697303	T	A	Il17b	ENSMUST00000025471.2	c.*4866T>A		downstream_gene_variant	1	-	-	-	-	-	-	-	-	-	0.286 (10/36)
18	61989909	C	A	Sh3tc2	ENSMUST00000051720.5	c.1740C>A	p.Tyr580*	stop_gained	1	-	-	-	-	-	-	-	-	-	0.289 (12/41)
18	62437457	C	T	Htr4	ENSMUST00000027560.6	c.582C>T	p.Ile194Ile	synonymous_variant	1	-	-	-	-	-	-	-	-	-	0.255 (15/66)
18	65051206	G	T	Nedd4l	ENSMUST00000163516.7	c.123-23518G>T		intron_variant	1	-	-	-	-	-	-	-	-	-	0.353 (31/82)
18	65305611	G	C	Alpk2	ENSMUST00000035548.14	c.4111C>G	p.Leu1371Val	missense_variant	1	-	-	-	-	-	-	-	-	-	0.348 (8/27)
18	67358853	A	G	Cidea	ENSMUST00000025404.8	c.182A>G	p.Lys61Arg	missense_variant&splice_region_variant	1	-	-	-	-	-	-	-	-	-	0.652 (20/29)
18	67431707	C	A	Afg3l2	ENSMUST00000025408.8	c.696G>T	p.Leu232Phe	missense_variant	1	-	-	-	-	-	-	-	-	-	0.257 (11/44)
18	67881288	A	T	Cep192	ENSMUST00000025425.5	c.7352A>T	p.Lys2451Met	missense_variant	1	-	-	-	-	-	-	-	-	-	0.352 (60/169)
18	70616588	A	G	Mbd2	ENSMUST00000074058.10	c.873A>G	p.Gln291Gln	synonymous_variant	1	-	-	-	-	-	-	-	-	-	0.322 (35/110)
18	73937184	A	G	Mapk4	ENSMUST00000091851.9	c.637T>C	p.Trp213Arg	missense_variant	1	-	-	-	-	-	-	-	-	-	0.3 (21/67)
18	75002736	A	C	Rpl17	ENSMUST00000079716.5	c.391A>C	p.Arg131Arg	synonymous_variant	1	-	-	-	-	-	-	-	-	-	0.303 (38/113)
18	75002736	A	C	BC031181	ENSMUST00000040284.4	c.-5938A>C		upstream_gene_variant	1	-	-	-	-	-	-	-	-	-	0.303 (38/113)
18	75002736	A	C	Snord58b	ENSMUST00000082937.1	n.*1613A>C		downstream_gene_variant	1	-	-	-	-	-	-	-	-	-	0.303 (38/113)
18	75002736	A	C	Gm23301	ENSMUST00000082713.1	n.*1217A>C		downstream_gene_variant	1	-	-	-	-	-	-	-	-	-	0.303 (38/113)
18	75002736	A	C	Gm26202	ENSMUST00000082910.1	n.*792A>C		downstream_gene_variant	1	-	-	-	-	-	-	-	-	-	0.303 (38/113)
18	77012057	T	C	Katnal2	ENSMUST00000126153.7	c.380A>G	p.Lys127Arg	missense_variant	1	-	-	-	-	-	-	-	-	-	0.268 (22/77)
18	77332566	C	A	Loxhd1	ENSMUST00000096547.9	c.885C>A	p.Ala295Ala	splice_region_variant&synonymous_variant	1	-	-	-	-	-	-	-	-	-	0.272 (34/127)
18	77781022	GC	G	Atp5a1	ENSMUST00000026495.14	c.1217delC	p.Pro406fs	frameshift_variant	1	-	-	-	-	-	-	-	-	-	0.093 (12/138)
18	78157368	G	T	Slc14a2	ENSMUST00000025434.13	c.2069C>A	p.Pro690His	missense_variant&splice_region_variant	1	-	-	-	-	-	-	-	-	-	0.462 (15/31)
18	78157369	G	C	Slc14a2	ENSMUST00000025434.13	c.2068C>G	p.Pro690Ala	missense_variant&splice_region_variant	1	-	-	-	-	-	-	-	-	-	0.462 (15/31)
18	80765865	T	A	Atp9b	ENSMUST00000091790.3	c.1838A>T	p.Gln613Leu	missense_variant	1	-	-	-	-	-	-	-	-	-	0.344 (11/34)
18	82987533	C	G	Zfp516	ENSMUST00000071233.6	c.2561C>G	p.Ala854Gly	missense_variant	1	-	-	-	-	-	-	-	-	-	0.538 (8/16)
19	3793118	G	T	Suv420h1	ENSMUST00000113972.8	c.214G>T	p.Gly72*	stop_gained	1	-	-	-	-	-	-	-	-	-	0.284 (27/104)
19	3903425	C	A	Tcirg1	ENSMUST00000001801.10	c.421G>T	p.Ala141Ser	missense_variant	1	-	-	-	-	-	-	-	-	-	0.39 (19/50)
19	3987107	G	T	Acy3	ENSMUST00000054030.7	c.38G>T	p.Arg13Leu	missense_variant	1	-	-	-	-	-	-	-	-	-	0.407 (12/29)
19	4106975	G	T	Pitpnm1	ENSMUST00000049658.13	c.1484+13G>T		intron_variant	1	-	-	-	-	-	-	-	-	-	0.517 (17/33)
19	4232172	G	T	Pold4	ENSMUST00000025773.3	c.81G>T	p.Glu27Asp	missense_variant	1	-	-	-	-	-	-	-	-	-	0.611 (26/45)
19	4287645	C	G	Adrbk1	ENSMUST00000088737.10	c.1704G>C	p.Met568Ile	missense_variant	1	-	-	-	-	-	-	-	-	-	0.417 (13/27)
19	4287645	C	G	Ankrd13d	ENSMUST00000056888.12	c.-4675G>C		upstream_gene_variant	1	-	-	-	-	-	-	-	-	-	0.417 (13/27)
19	4351720	T	C	Kdm2a	ENSMUST00000047898.13	c.687+17A>G		intron_variant	1	-	-	-	-	-	-	-	-	-	0.261 (33/135)
19	4453978	G	A	Syt12	ENSMUST00000059295.9	c.624C>T	p.Ile208Ile	splice_region_variant&synonymous_variant	1	-	-	-	-	-	-	-	-	-	0.519 (18/35)
19	4602898	C	A	Pcx	ENSMUST00000068004.12	c.754+23C>A		intron_variant	1	-	-	-	-	-	-	-	-	-	0.7 (18/25)
19	4619073	G	T	Pcx	ENSMUST00000068004.12	c.2101G>T	p.Val701Leu	missense_variant	1	-	-	-	-	-	-	-	-	-	0.553 (22/40)
19	4619073	G	T	Lrfn4	ENSMUST00000053597.2	c.-4569C>A		upstream_gene_variant	1	-	-	-	-	-	-	-	-	-	0.553 (22/40)
19	4619073	G	T	Rce1	ENSMUST00000025823.3	c.*3934C>A		downstream_gene_variant	1	-	-	-	-	-	-	-	-	-	0.553 (22/40)
19	4619073	G	T	Mir6986	ENSMUST00000184483.1	n.*4825C>A		downstream_gene_variant	1	-	-	-	-	-	-	-	-	-	0.553 (22/40)
19	4738205	C	A	Sptbn2	ENSMUST00000008991.6	c.3211C>A	p.Leu1071Met	missense_variant	1	-	-	-	-	-	-	-	-	-	0.619 (16/30)
19	4745191	C	G	Sptbn2	ENSMUST00000008991.6	c.4676C>G	p.Ala1559Gly	missense_variant	1	-	-	-	-	-	-	-	-	-	0.462 (15/30)
19	4745191	C	G	Gm21992	ENSMUSG00000096370	n.4745191G>C		intragenic_variant	1	-	-	-	-	-	-	-	-	-	0.462 (15/30)
19	4841923	G	A	Ccdc87	ENSMUST00000088653.2	c.2442G>A	p.Trp814*	stop_gained	1	-	-	-	-	-	-	-	-	-	0.469 (17/34)
19	4841923	G	A	Ccs	ENSMUST00000037246.5	c.-2688C>T		upstream_gene_variant	1	-	-	-	-	-	-	-	-	-	0.469 (17/34)
19	4856306	C	A	Ctsf	ENSMUST00000119694.1	c.463C>A	p.Gln155Lys	missense_variant&splice_region_variant	1	-	-	-	-	-	-	-	-	-	0.541 (77/142)
19	4856306	C	A	Actn3	ENSMUST00000006626.3	c.*5039G>T		downstream_gene_variant	1	-	-	-	-	-	-	-	-	-	0.541 (77/142)
19	4872206	C	A	Actn3	ENSMUST00000006626.3	c.379+33G>T		intron_variant	1	-	-	-	-	-	-	-	-	-	0.4 (37/89)
19	4922341	T	G	Dpp3	ENSMUST00000025851.3	c.554A>C	p.Gln185Pro	missense_variant	1	-	-	-	-	-	-	-	-	-	0.455 (56/113)
19	4934967	C	A	Peli3	ENSMUST00000025834.13	c.515G>T	p.Arg172Leu	missense_variant	1	-	-	-	-	-	-	-	-	-	0.512 (22/45)
19	5047435	C	T	Brms1	ENSMUST00000116567.2	c.579C>T	p.Ala193Ala	synonymous_variant	1	-	-	-	-	-	-	-	-	-	0.222 (9/34)
19	5047435	C	T	Rin1	ENSMUST00000025818.6	c.-3424C>T		upstream_gene_variant	1	-	-	-	-	-	-	-	-	-	0.222 (9/34)
19	5049387	A	T	Rin1	ENSMUST00000025818.6	c.-1472A>T		upstream_gene_variant	1	-	-	-	-	-	-	-	-	-	0.278 (27/96)
19	5049387	A	T	Brms1	ENSMUST00000116567.2	c.734-20A>T		intron_variant	1	-	-	-	-	-	-	-	-	-	0.278 (27/96)
19	5106959	C	A	Rab1b	ENSMUST00000025804.5	c.-21G>T		5_prime_UTR_variant	1	-	-	-	-	-	-	-	-	-	0.364 (13/38)
19	5106959	C	A	Klc2	ENSMUST00000116563.7	c.*1646G>T		downstream_gene_variant	1	-	-	-	-	-	-	-	-	-	0.364 (13/38)
19	5466169	G	T	Fibp	ENSMUST00000025847.5	c.*1175G>T		downstream_gene_variant	1	-	-	-	-	-	-	-	-	-	0.5 (47/95)
19	5466169	G	T	Ctsw	ENSMUST00000025844.4	c.614-24C>A		intron_variant	1	-	-	-	-	-	-	-	-	-	0.5 (47/95)
19	5609997	C	A	Kat5	ENSMUST00000113641.2	c.12+21G>T		intron_variant	1	-	-	-	-	-	-	-	-	-	0.5 (8/15)
19	5641649	A	T	Rela	ENSMUST00000025867.5	c.850A>T	p.Met284Leu	missense_variant	1	-	-	-	-	-	-	-	-	-	0.455 (10/24)
19	5687119	C	A	Pcnx3	ENSMUST00000113615.8	c.441G>T	p.Ser147Ser	splice_region_variant&synonymous_variant	1	-	-	-	-	-	-	-	-	-	0.526 (12/24)
19	5687119	C	A	Map3k11	ENSMUST00000004156.8	c.-3128C>A		upstream_gene_variant	1	-	-	-	-	-	-	-	-	-	0.526 (12/24)
19	5687220	T	A	Pcnx3	ENSMUST00000113615.8	c.342-2A>T		splice_acceptor_variant&intron_variant	1	-	-	-	-	-	-	-	-	-	0.533 (10/18)
19	5687220	T	A	Map3k11	ENSMUST00000004156.8	c.-3027T>A		upstream_gene_variant	1	-	-	-	-	-	-	-	-	-	0.533 (10/18)
19	5708810	C	T	Ehbp1l1	ENSMUST00000049295.14	c.4890G>A	p.Glu1630Glu	synonymous_variant	1	-	-	-	-	-	-	-	-	-	0.5 (20/43)
19	5708810	C	T	Kcnk7	ENSMUST00000052448.3	c.*1794C>T		downstream_gene_variant	1	-	-	-	-	-	-	-	-	-	0.5 (20/43)
19	5717889	T	A	Ehbp1l1	ENSMUST00000049295.14	c.3385A>T	p.Met1129Leu	missense_variant	1	-	-	-	-	-	-	-	-	-	0.484 (39/80)
19	5722909	T	C	Gm16538	ENSMUST00000162407.1	n.-4297T>C		upstream_gene_variant	1	-	-	-	-	-	-	-	-	-	0.357 (10/31)
19	5722909	T	C	Ehbp1l1	ENSMUST00000049295.14	c.162+41A>G		intron_variant	1	-	-	-	-	-	-	-	-	-	0.357 (10/31)
19	6014278	C	G	Capn1	ENSMUST00000025891.8	c.190G>C	p.Val64Leu	missense_variant	1	-	-	-	-	-	-	-	-	-	0.731 (20/29)
19	6014278	C	G	Gm10814	ENSMUST00000180505.1	n.115C>G		non_coding_transcript_exon_variant	1	-	-	-	-	-	-	-	-	-	0.731 (20/29)
19	6080121	T	C	Tmem262	ENSMUST00000143303.1	c.-22T>C		5_prime_UTR_premature_start_codon_gain_variant&5_prime_UTR_variant	1	-	-	-	-	-	-	-	-	-	0.361 (16/42)
19	6080121	T	C	Vps51	ENSMUST00000025711.11	c.-2943A>G		upstream_gene_variant&intragenic_variant	1	-	-	-	-	-	-	-	-	-	0.361 (16/42)
19	6080121	T	C	Cdca5	ENSMUST00000025704.2	c.-5042T>C		upstream_gene_variant	1	-	-	-	-	-	-	-	-	-	0.361 (16/42)
19	6080121	T	C	Zfpl1	ENSMUST00000025707.8	c.*907A>G		downstream_gene_variant	1	-	-	-	-	-	-	-	-	-	0.361 (16/42)
19	6080121	T	C	Gm28374	ENSMUST00000162374.2	c.193+1726A>G		intron_variant	1	-	-	-	-	-	-	-	-	-	0.361 (16/42)
19	6335052	G	C	Men1	ENSMUST00000113502.9	c.-17G>C		5_prime_UTR_variant	1	-	-	-	-	-	-	-	-	-	0.627 (41/65)
19	6345450	G	T	Map4k2	ENSMUST00000025897.12	c.1104G>T	p.Leu368Leu	synonymous_variant	1	-	-	-	-	-	-	-	-	-	0.204 (13/64)
19	6345450	G	T	Mir6989	ENSMUST00000184812.1	n.-1030G>T		upstream_gene_variant	1	-	-	-	-	-	-	-	-	-	0.204 (13/64)
19	6345450	G	T	Men1	ENSMUST00000113502.9	c.*5278G>T		downstream_gene_variant	1	-	-	-	-	-	-	-	-	-	0.204 (13/64)
19	6368418	T	TC	Sf1	ENSMUST00000131252.7	c.221dupC	p.Asn75fs	frameshift_variant	1	-	-	-	-	-	-	-	-	-	0.226 (25/101)
19	6368418	T	TC	Gm14966	ENSMUST00000129675.7	n.-4884dupG		upstream_gene_variant	1	-	-	-	-	-	-	-	-	-	0.226 (25/101)
19	6538682	G	T	Slc22a12	ENSMUST00000113451.7	c.948C>A	p.Thr316Thr	synonymous_variant	1	-	-	-	-	-	-	-	-	-	0.233 (11/53)
19	6538682	G	T	Nrxn2	ENSMUSG00000033768	n.6538682G>T		intragenic_variant	1	-	-	-	-	-	-	-	-	-	0.233 (11/53)
19	6854445	C	T	Ccdc88b	ENSMUST00000113440.1	c.1333+34G>A		intron_variant	1	-	-	-	-	-	-	-	-	-	0.25 (10/39)
19	7022308	C	A	Stip1	ENSMUST00000025918.7	c.1246G>T	p.Asp416Tyr	missense_variant&splice_region_variant	1	-	-	-	-	-	-	-	-	-	0.219 (16/76)
19	7022308	C	A	Fermt3	ENSMUST00000040772.8	c.-3483G>T		upstream_gene_variant	1	-	-	-	-	-	-	-	-	-	0.219 (16/76)
19	7709608	A	G	Gm15968	ENSMUST00000119342.1	n.-4495T>C		upstream_gene_variant	1	-	-	-	-	-	-	-	-	-	0.326 (39/116)
19	7709608	A	G	Slc22a19	ENSMUST00000025666.7	c.506+25T>C		intron_variant	1	-	-	-	-	-	-	-	-	-	0.326 (39/116)
19	8062383	C	A	Slc22a28	ENSMUST00000065651.4	c.1624G>T	p.Glu542*	stop_gained	1	-	-	-	-	-	-	-	-	-	0.78 (124/160)
19	8593922	A	G	Slc22a8	ENSMUST00000010251.9	c.16A>G	p.Ile6Val	missense_variant	1	-	-	-	-	-	-	-	-	-	0.745 (46/61)
19	8593922	A	G	Gm6425	ENSMUST00000136332.1	n.-4726T>C		upstream_gene_variant	1	-	-	-	-	-	-	-	-	-	0.745 (46/61)
19	8623543	A	G	Slc22a6	ENSMUST00000010250.2	c.1099A>G	p.Ile367Val	missense_variant	1	-	-	-	-	-	-	-	-	-	0.256 (25/95)
19	8678379	G	T	Chrm1	ENSMUST00000035444.9	c.447G>T	p.Ala149Ala	synonymous_variant	1	-	-	-	-	-	-	-	-	-	0.775 (66/83)
19	8678379	G	T	Gm22820	ENSMUST00000157205.1	n.*3456C>A		downstream_gene_variant	1	-	-	-	-	-	-	-	-	-	0.775 (66/83)
19	8739297	G	A	Wdr74	ENSMUST00000049424.10	c.650G>A	p.Arg217His	missense_variant	1	-	-	-	-	-	-	-	-	-	0.324 (59/170)
19	8739297	G	A	RP23-62O7.9	ENSMUST00000210592.1	c.650G>A	p.Arg217His	missense_variant	1	-	-	-	-	-	-	-	-	-	0.324 (59/170)
19	8739297	G	A	1700092M07Rik	ENSMUST00000163172.1	c.-1471G>A		upstream_gene_variant	1	-	-	-	-	-	-	-	-	-	0.324 (59/170)
19	8739297	G	A	Stx5a	ENSMUST00000010254.15	c.-2976G>A		upstream_gene_variant	1	-	-	-	-	-	-	-	-	-	0.324 (59/170)
19	8739297	G	A	Mir6992	ENSMUST00000183342.1	n.-3674G>A		upstream_gene_variant	1	-	-	-	-	-	-	-	-	-	0.324 (59/170)
19	8972503	G	T	Eef1g	ENSMUST00000052248.7	c.523-4G>T		splice_region_variant&intron_variant	1	-	-	-	-	-	-	-	-	-	0.675 (70/104)
19	9877687	C	A	Incenp	ENSMUST00000025562.7	c.1859G>T	p.Trp620Leu	missense_variant	1	-	-	-	-	-	-	-	-	-	0.692 (23/34)
19	10186928	G	C	Mir6993	ENSMUST00000184912.1	n.-4447G>C		upstream_gene_variant	1	-	-	-	-	-	-	-	-	-	0.75 (39/52)
19	10186928	G	C	Fads1	ENSMUST00000010807.4	c.753+45G>C		intron_variant	1	-	-	-	-	-	-	-	-	-	0.75 (39/52)
19	10193704	T	A	Fads1	ENSMUST00000010807.4	c.895T>A	p.Leu299Met	missense_variant	1	-	-	-	-	-	-	-	-	-	0.806 (29/35)
19	10193704	T	A	Gm10143	ENSMUST00000150038.1	n.-4664T>A		upstream_gene_variant	1	-	-	-	-	-	-	-	-	-	0.806 (29/35)
19	10193704	T	A	Mir6993	ENSMUST00000184912.1	n.*2265T>A		downstream_gene_variant	1	-	-	-	-	-	-	-	-	-	0.806 (29/35)
19	10443410	T	C	Syt7	ENSMUST00000169121.7	c.1318T>C	p.Tyr440His	missense_variant	1	-	-	-	-	-	-	-	-	-	0.095 (8/86)
19	10477171	G	T	Ppp1r32	ENSMUST00000038842.3	c.948+34C>A		intron_variant	1	-	-	-	-	-	-	-	-	-	0.776 (39/52)
19	10674818	C	G	Pga5	ENSMUST00000025647.5	c.450+9G>C		intron_variant	1	-	-	-	-	-	-	-	-	-	0.813 (29/36)
19	10785527	C	A	Cd6	ENSMUST00000080292.11	c.*4646G>T		downstream_gene_variant	1	-	-	-	-	-	-	-	-	-	0.256 (13/48)
19	10785527	C	A	A430093F15Rik	ENSMUST00000186596.5	n.1599C>A		non_coding_transcript_exon_variant	1	-	-	-	-	-	-	-	-	-	0.256 (13/48)
19	10848558	G	C	Slc15a3	ENSMUST00000025646.2	c.612G>C	p.Trp204Cys	missense_variant	1	-	-	-	-	-	-	-	-	-	0.192 (11/58)
19	10863210	C	A	Tmem132a	ENSMUST00000025645.13	c.1344+13G>T		intron_variant	1	-	-	-	-	-	-	-	-	-	0.313 (15/46)
19	10899444	G	T	Prpf19	ENSMUST00000179297.2	c.582+12G>T		intron_variant	1	-	-	-	-	-	-	-	-	-	0.684 (43/63)
19	10917914	A	C	Zp1	ENSMUST00000025641.1	c.973T>G	p.Cys325Gly	missense_variant	1	-	-	-	-	-	-	-	-	-	0.778 (61/75)
19	10968667	G	T	Ms4a10	ENSMUST00000072748.12	c.99C>A	p.Ala33Ala	synonymous_variant	1	-	-	-	-	-	-	-	-	-	0.75 (35/47)
19	11070760	G	A	Ms4a8a	ENSMUST00000025636.7	c.605C>T	p.Ser202Leu	missense_variant	1	-	-	-	-	-	-	-	-	-	0.701 (61/90)
19	11283628	A	T	4930526L06Rik	ENSMUST00000181137.1	n.149-9012A>T		intron_variant	1	-	-	-	-	-	-	-	-	-	0.765 (108/141)
19	11283628	A	T	Ms4a5	ENSMUST00000067673.12	c.153+13T>A		intron_variant	1	-	-	-	-	-	-	-	-	-	0.765 (108/141)
19	11511624	G	C	Gm8369	ENSMUST00000079855.10	c.274G>C	p.Ala92Pro	missense_variant	1	-	-	-	-	-	-	-	-	-	0.237 (22/88)
19	11511624	G	C	Gm19261	ENSMUST00000189628.1	n.*4587C>G		downstream_gene_variant	1	-	-	-	-	-	-	-	-	-	0.237 (22/88)
19	11520500	G	T	Gm19261	ENSMUST00000189628.1	n.-3547C>A		upstream_gene_variant	1	-	-	-	-	-	-	-	-	-	0.205 (10/53)
19	11520500	G	T	Ms4a6b	ENSMUST00000025580.9	c.147+15G>T		intron_variant	1	-	-	-	-	-	-	-	-	-	0.205 (10/53)
19	11570777	A	T	Gm10212	ENSMUST00000087884.2	n.156A>T		non_coding_transcript_exon_variant	1	-	-	-	-	-	-	-	-	-	0.068 (24/353)
19	12228746	G	A	Olfr1432	ENSMUST00000207710.1	c.814C>T	p.His272Tyr	missense_variant	1	-	-	-	-	-	-	-	-	-	0.795 (79/97)
19	12322267	T	G	Olfr1437	ENSMUST00000052558.3	c.559A>C	p.Asn187His	missense_variant	1	-	-	-	-	-	-	-	-	-	0.264 (61/240)
19	12429029	C	T	Pfpl	ENSMUST00000168148.1	c.643C>T	p.Leu215Leu	synonymous_variant	1	-	-	-	-	-	-	-	-	-	0.195 (25/135)
19	12429941	G	T	Pfpl	ENSMUST00000168148.1	c.1555G>T	p.Glu519*	stop_gained	1	-	-	-	-	-	-	-	-	-	0.216 (25/119)
19	12674310	C	A	Olfr1442	ENSMUST00000057924.2	c.104C>A	p.Thr35Asn	missense_variant	1	-	-	-	-	-	-	-	-	-	0.247 (47/187)
19	12674310	C	A	Olfr1443	ENSMUST00000049724.7	c.-5800C>A		upstream_gene_variant	1	-	-	-	-	-	-	-	-	-	0.247 (47/187)
19	12777927	A	T	Zfp91	ENSMUST00000038627.8	c.728+15T>A		intron_variant	1	-	-	-	-	-	-	-	-	-	0.158 (15/95)
19	12778034	T	G	Zfp91	ENSMUST00000038627.8	c.636A>C	p.Glu212Asp	missense_variant	1	-	-	-	-	-	-	-	-	-	0.125 (11/88)
19	12824947	C	A	Lpxn	ENSMUST00000025601.6	c.635C>A	p.Ala212Asp	missense_variant	1	-	-	-	-	-	-	-	-	-	0.225 (9/44)
19	12846865	C	A	Gm5244	ENSMUST00000189517.1	n.184C>A		non_coding_transcript_exon_variant	1	-	-	-	-	-	-	-	-	-	0.654 (18/27)
19	13063646	A	T	Olfr1454	ENSMUST00000073732.3	c.234A>T	p.Lys78Asn	missense_variant	1	-	-	-	-	-	-	-	-	-	0.239 (66/264)
19	13364915	T	G	Olfr1467	ENSMUST00000054687.2	c.286T>G	p.Cys96Gly	missense_variant	1	-	-	-	-	-	-	-	-	-	0.19 (28/156)
19	13364916	G	C	Olfr1467	ENSMUST00000054687.2	c.287G>C	p.Cys96Ser	missense_variant	1	-	-	-	-	-	-	-	-	-	0.19 (28/157)
19	13471394	A	C	Olfr1474	ENSMUST00000096202.1	c.423A>C	p.Leu141Leu	synonymous_variant	1	-	-	-	-	-	-	-	-	-	0.052 (14/291)
19	13619662	T	G	Olfr1487	ENSMUST00000076856.1	c.499T>G	p.Phe167Val	missense_variant	1	-	-	-	-	-	-	-	-	-	0.059 (13/230)
19	13654463	C	A	Olfr1490	ENSMUST00000208667.1	c.33C>A	p.His11Gln	missense_variant	1	-	-	-	-	-	-	-	-	-	0.204 (17/71)
19	13705203	C	G	Olfr1491	ENSMUST00000052737.1	c.375C>G	p.Asp125Glu	missense_variant	1	-	-	-	-	-	-	-	-	-	0.255 (43/171)
19	13769343	C	G	Olfr1495	ENSMUST00000061669.2	c.*40C>G		3_prime_UTR_variant	1	-	-	-	-	-	-	-	-	-	0.31 (23/76)
19	13781198	G	A	Olfr1496	ENSMUST00000057390.3	c.579G>A	p.Met193Ile	missense_variant	1	-	-	-	-	-	-	-	-	-	0.056 (9/141)
19	13781198	G	A	Olfr1496	ENSMUST00000209137.1	c.585G>A	p.Met195Ile	missense_variant	1	-	-	-	-	-	-	-	-	-	0.056 (9/141)
19	13795547	A	T	Olfr1497	ENSMUST00000061993.2	c.63T>A	p.Pro21Pro	synonymous_variant	1	-	-	-	-	-	-	-	-	-	0.6 (37/57)
19	13815292	G	T	Olfr1499	ENSMUST00000055672.3	c.297C>A	p.Ala99Ala	synonymous_variant	1	-	-	-	-	-	-	-	-	-	0.291 (27/100)
19	13827899	G	T	Olfr1500	ENSMUST00000067670.3	c.496C>A	p.Leu166Ile	missense_variant	1	-	-	-	-	-	-	-	-	-	0.614 (39/67)
19	16679984	T	C	Vps13a	ENSMUST00000068156.6	c.5394+26A>G		intron_variant	1	-	-	-	-	-	-	-	-	-	0.299 (27/83)
19	17565296	G	T	Pcsk5	ENSMUST00000025618.14	c.2358C>A	p.Pro786Pro	synonymous_variant	1	-	-	-	-	-	-	-	-	-	0.231 (9/47)
19	18679213	C	G	Carnmt1	ENSMUST00000025632.9	c.509C>G	p.Ala170Gly	missense_variant	1	-	-	-	-	-	-	-	-	-	0.256 (24/94)
19	18704090	G	C	Carnmt1	ENSMUST00000025632.9	c.1172G>C	p.Cys391Ser	missense_variant	1	-	-	-	-	-	-	-	-	-	0.69 (95/142)
19	20620116	A	C	Aldh1a1	ENSMUST00000087638.3	c.442+18A>C		intron_variant	1	-	-	-	-	-	-	-	-	-	0.288 (23/84)
19	20826506	T	A	Tmc1	ENSMUST00000039500.3	c.1206A>T	p.Glu402Asp	missense_variant&splice_region_variant	1	-	-	-	-	-	-	-	-	-	0.788 (28/37)
19	21826082	G	T	Tmem2	ENSMUST00000025663.6	c.2478G>T	p.Val826Val	synonymous_variant	1	-	-	-	-	-	-	-	-	-	0.25 (21/81)
19	23334057	A	C	Mamdc2	ENSMUST00000036069.6	c.1432T>G	p.Phe478Val	missense_variant	1	-	-	-	-	-	-	-	-	-	0.309 (31/101)
19	24132663	A	G	Tjp2	ENSMUST00000099558.4	c.216T>C	p.Asp72Asp	synonymous_variant	1	-	-	-	-	-	-	-	-	-	0.111 (10/100)
19	24262042	C	G	Fxn	ENSMUST00000081333.10	c.485G>C	p.Arg162Pro	missense_variant	1	-	-	-	-	-	-	-	-	-	0.796 (47/58)
19	24397081	C	A	Pip5k1b	ENSMUST00000025800.14	c.135G>T	p.Thr45Thr	synonymous_variant	1	-	-	-	-	-	-	-	-	-	0.215 (18/89)
19	25378544	G	A	Kank1	ENSMUST00000049400.14	c.37+14G>A		intron_variant	1	-	-	-	-	-	-	-	-	-	0.238 (18/77)
19	25678000	T	C	Dmrt2	ENSMUST00000053068.5	c.962T>C	p.Leu321Pro	missense_variant	1	-	-	-	-	-	-	-	-	-	0.202 (23/104)
19	27323438	G	T	Kcnv2	ENSMUST00000056708.3	c.688G>T	p.Ala230Ser	missense_variant	1	-	-	-	-	-	-	-	-	-	0.697 (26/38)
19	28283768	G	C	Glis3	ENSMUST00000162022.7	c.2372C>G	p.Pro791Arg	missense_variant	1	-	-	-	-	-	-	-	-	-	0.75 (28/37)
19	29271398	G	A	Jak2	ENSMUST00000025705.6	c.274G>A	p.Glu92Lys	missense_variant	1	-	-	-	-	-	-	-	-	-	0.381 (44/117)
19	31918017	A	C	A1cf	ENSMUST00000075838.5	c.499A>C	p.Ile167Leu	missense_variant	1	-	-	-	-	-	-	-	-	-	0.468 (32/73)
19	32620223	G	T	Papss2	ENSMUST00000025833.6	c.33+37G>T		intron_variant	1	-	-	-	-	-	-	-	-	-	1.0 (52/52)
19	32798115	G	A	Pten	ENSMUST00000013807.7	c.253+1G>A		splice_donor_variant&intron_variant	1	-	-	-	-	-	-	-	-	-	0.985 (157/159)
19	33584928	A	C	Lipo3	ENSMUST00000025694.6	c.41T>G	p.Leu14Arg	missense_variant	1	-	-	-	-	-	-	-	-	-	0.294 (49/163)
19	33965595	T	A	Lipf	ENSMUST00000025680.4	c.302T>A	p.Leu101Gln	missense_variant	1	-	-	-	-	-	-	-	-	-	1.0 (32/32)
19	34587590	G	A	Ifit3	ENSMUST00000102825.3	c.535G>A	p.Ala179Thr	missense_variant	1	-	-	-	-	-	-	-	-	-	0.129 (12/97)
19	34879721	G	T	Pank1	ENSMUST00000036584.11	c.-645C>A		upstream_gene_variant	1	-	-	-	-	-	-	-	-	-	0.98 (61/62)
19	34879721	G	T	Pank1-Kif20b	ENSMUSG00000033610-ENSMUSG00000024795	n.34879721G>T		intergenic_region	1	-	-	-	-	-	-	-	-	-	0.98 (61/62)
19	34952875	C	G	Kif20b	ENSMUST00000087341.5	c.3779C>G	p.Ser1260Cys	missense_variant	1	-	-	-	-	-	-	-	-	-	0.367 (20/58)
19	36879226	G	A	Tnks2	ENSMUST00000025729.11	c.2359-9G>A		intron_variant	1	-	-	-	-	-	-	-	-	-	0.985 (88/89)
19	37315491	C	T	Ide	ENSMUST00000131070.1	c.712G>A	p.Val238Met	missense_variant	1	-	-	-	-	-	-	-	-	-	1.0 (43/43)
19	37687104	G	C	Exoc6	ENSMUST00000066439.6	c.*4126G>C		downstream_gene_variant	1	-	-	-	-	-	-	-	-	-	1.0 (13/13)
19	37687104	G	C	Cyp26c1	ENSMUST00000073391.4	c.430-15G>C		intron_variant	1	-	-	-	-	-	-	-	-	-	1.0 (13/13)
19	38701894	C	T	Plce1	ENSMUST00000182267.1	c.2021C>T	p.Ala674Val	missense_variant	1	-	-	-	-	-	-	-	-	-	0.099 (9/88)
19	38724980	G	T	Plce1	ENSMUST00000182267.1	c.3691G>T	p.Glu1231*	stop_gained	1	-	-	-	-	-	-	-	-	-	1.0 (43/43)
19	38728649	T	TA	Plce1	ENSMUST00000182267.1	c.3997-28dupA		intron_variant	1	-	-	-	-	-	-	-	-	-	0.163 (17/102)
19	38769460	A	G	Plce1	ENSMUST00000182267.1	c.5876A>G	p.His1959Arg	missense_variant	1	-	-	-	-	-	-	-	-	-	0.277 (22/79)
19	38965407	G	T	Hells	ENSMUST00000025965.11	c.2295G>T	p.Arg765Ser	missense_variant&splice_region_variant	1	-	-	-	-	-	-	-	-	-	1.0 (30/30)
19	39035513	C	T	Cyp2c55	ENSMUST00000025966.4	c.1030C>T	p.Arg344Cys	missense_variant	1	-	-	-	-	-	-	-	-	-	0.987 (90/91)
19	39093313	T	A	Cyp2c65	ENSMUST00000087236.4	c.1292-10T>A		intron_variant	1	-	-	-	-	-	-	-	-	-	0.612 (61/100)
19	39324997	G	A	Cyp2c29	ENSMUST00000003137.14	c.1053G>A	p.Met351Ile	missense_variant	1	-	-	-	-	-	-	-	-	-	0.986 (80/81)
19	39392111	T	C	Cyp2c38	ENSMUST00000035488.2	c.1291+38A>G		intron_variant	1	-	-	-	-	-	-	-	-	-	0.263 (33/115)
19	40046215	G	A	Cyp2c54	ENSMUST00000048959.3	c.1010C>T	p.Pro337Leu	missense_variant	1	-	-	-	-	-	-	-	-	-	0.238 (35/149)
19	40153554	C	T	Cyp2c70	ENSMUST00000051846.12	c.*22G>A		3_prime_UTR_variant	1	-	-	-	-	-	-	-	-	-	1.0 (35/35)
19	40562890	C	A	Gm15801	ENSMUST00000120920.1	n.-1832G>T		upstream_gene_variant	1	-	-	-	-	-	-	-	-	-	1.0 (26/26)
19	40562890	C	A	Aldh18a1	ENSMUST00000025979.12	c.1605+12G>T		intron_variant	1	-	-	-	-	-	-	-	-	-	1.0 (26/26)
19	40738964	G	T	Entpd1	ENSMUST00000134063.7	c.1555G>T	p.Ala519Ser	missense_variant	1	-	-	-	-	-	-	-	-	-	1.0 (41/41)
19	40844984	G	T	Ccnj	ENSMUST00000025983.12	c.580+25G>T		intron_variant	1	-	-	-	-	-	-	-	-	-	1.0 (87/87)
19	40951034	C	A	Blnk	ENSMUST00000054769.6	c.608-9G>T		intron_variant	1	-	-	-	-	-	-	-	-	-	0.682 (65/95)
19	41218247	C	A	Tm9sf3	ENSMUST00000025989.8	c.1458G>T	p.Leu486Leu	synonymous_variant	1	-	-	-	-	-	-	-	-	-	0.764 (48/65)
19	41238809	C	A	Tm9sf3	ENSMUST00000025989.8	c.822G>T	p.Gln274His	missense_variant	1	-	-	-	-	-	-	-	-	-	0.778 (54/70)
19	41460275	G	T	Gm9788	ENSMUST00000057038.3	n.463G>T		non_coding_transcript_exon_variant	1	-	-	-	-	-	-	-	-	-	0.667 (62/94)
19	42263282	C	T	Golga7b	ENSMUST00000087123.5	c.13-47C>T		intron_variant	1	-	-	-	-	-	-	-	-	-	0.476 (12/25)
19	42287926	T	G	Crtac1	ENSMUST00000048630.6	c.1562A>C	p.Glu521Ala	missense_variant	1	-	-	-	-	-	-	-	-	-	0.696 (19/27)
19	43725358	G	C	Entpd7	ENSMUST00000081079.5	c.1155G>C	p.Leu385Phe	missense_variant	1	-	-	-	-	-	-	-	-	-	0.833 (30/37)
19	43760016	T	C	Cutc	ENSMUST00000112047.9	c.357T>C	p.Thr119Thr	synonymous_variant	1	-	-	-	-	-	-	-	-	-	0.229 (22/105)
19	44149271	G	T	Pkd2l1	ENSMUST00000042026.4	c.2123C>A	p.Thr708Lys	missense_variant	1	-	-	-	-	-	-	-	-	-	0.757 (71/93)
19	44149271	G	T	Bloc1s2	ENSMUST00000079033.4	c.-2855C>A		upstream_gene_variant	1	-	-	-	-	-	-	-	-	-	0.757 (71/93)
19	44235876	G	T	Scd3	ENSMUST00000026220.5	c.547G>T	p.Gly183Cys	missense_variant	1	-	-	-	-	-	-	-	-	-	0.669 (87/130)
19	44403218	C	G	Scd1	ENSMUST00000041331.2	c.376G>C	p.Ala126Pro	missense_variant	1	-	-	-	-	-	-	-	-	-	0.257 (10/40)
19	45001223	G	A	Sema4g	ENSMUST00000026225.14	c.1740G>A	p.Leu580Leu	synonymous_variant	1	-	-	-	-	-	-	-	-	-	0.269 (9/37)
19	45001223	G	A	Mrpl43	ENSMUST00000097715.2	c.*4476C>T		downstream_gene_variant	1	-	-	-	-	-	-	-	-	-	0.269 (9/37)
19	46003688	G	C	Hps6	ENSMUST00000099393.2	c.63G>C	p.Arg21Arg	synonymous_variant	1	-	-	-	-	-	-	-	-	-	0.421 (9/27)
19	46003688	G	C	4930505N22Rik	ENSMUST00000181820.1	n.583+4969G>C		intron_variant	1	-	-	-	-	-	-	-	-	-	0.421 (9/27)
19	47239873	C	A	Neurl1a	ENSMUST00000111808.9	c.157C>A	p.Leu53Met	missense_variant	1	-	-	-	-	-	-	-	-	-	0.211 (8/45)
19	47622276	A	C	Slk	ENSMUST00000051691.7	c.2384A>C	p.Lys795Thr	missense_variant	1	-	-	-	-	-	-	-	-	-	0.282 (38/146)
19	48645804	G	T	Sorcs3	ENSMUST00000078880.5	c.1041G>T	p.Lys347Asn	missense_variant	1	-	-	-	-	-	-	-	-	-	0.739 (23/32)
19	48683528	G	T	Sorcs3	ENSMUST00000078880.5	c.1204-39G>T		intron_variant	1	-	-	-	-	-	-	-	-	-	0.675 (62/93)
19	48796414	T	G	Sorcs3	ENSMUST00000078880.5	c.3275T>G	p.Phe1092Cys	missense_variant	1	-	-	-	-	-	-	-	-	-	0.137 (26/194)
19	55863585	G	A	Tcf7l2	ENSMUST00000111662.10	c.484-44838G>A		intron_variant	1	-	-	-	-	-	-	-	-	-	0.375 (8/19)
19	56317760	T	C	Habp2	ENSMUST00000078284.12	c.1388T>C	p.Val463Ala	missense_variant	1	-	-	-	-	-	-	-	-	-	0.458 (15/28)
19	56317760	T	C	Nrap	ENSMUST00000073536.12	c.*2435A>G		downstream_gene_variant	1	-	-	-	-	-	-	-	-	-	0.458 (15/28)
19	56345517	CTG	C	Nrap	ENSMUST00000073536.12	c.3010_3011delCA	p.Gln1004fs	frameshift_variant	1	-	-	-	-	-	-	-	-	-	0.471 (17/41)
19	57043084	T	C	Ablim1	ENSMUST00000079360.11	c.2183-23A>G		intron_variant	1	-	-	-	-	-	-	-	-	-	0.529 (21/40)
19	58762278	G	A	Pnliprp2	ENSMUST00000026081.3	c.398G>A	p.Cys133Tyr	missense_variant	1	-	-	-	-	-	-	-	-	-	0.273 (17/68)
19	58787706	T	G	1700019N19Rik	ENSMUST00000028299.10	c.314A>C	p.Lys105Thr	missense_variant	1	-	-	-	-	-	-	-	-	-	0.429 (9/21)
19	58787706	T	G	Gm22561	ENSMUST00000157331.1	n.-1015A>C		upstream_gene_variant	1	-	-	-	-	-	-	-	-	-	0.429 (9/21)
19	58787706	T	G	Gm17150	ENSMUST00000165577.1	n.-2489T>G		upstream_gene_variant	1	-	-	-	-	-	-	-	-	-	0.429 (9/21)
19	59234959	G	T	Kcnk18	ENSMUST00000065204.6	c.535G>T	p.Ala179Ser	missense_variant	1	-	-	-	-	-	-	-	-	-	0.483 (15/32)
19	60757174	T	G	Nanos1	ENSMUST00000088237.4	c.*105T>G		3_prime_UTR_variant	1	-	-	-	-	-	-	-	-	-	0.556 (18/31)
19	60757174	T	G	Eif3a	ENSMUST00000025955.6	c.*4907A>C		downstream_gene_variant	1	-	-	-	-	-	-	-	-	-	0.556 (18/31)
2	3329522	T	G	Rpp38	ENSMUST00000062672.6	c.342A>C	p.Glu114Asp	missense_variant	1	-	-	-	-	-	-	-	-	-	0.228 (36/137)
2	3329522	T	G	Nmt2	ENSMUST00000081932.12	c.*3431T>G		downstream_gene_variant	1	-	-	-	-	-	-	-	-	-	0.228 (36/137)
2	4498021	A	G	Frmd4a	ENSMUST00000091497.10	c.320A>G	p.Asp107Gly	missense_variant	1	-	-	-	-	-	-	-	-	-	0.187 (21/118)
2	5804985	T	G	Cdc123	ENSMUST00000043864.8	c.614A>C	p.Gln205Pro	missense_variant	1	-	-	-	-	-	-	-	-	-	0.179 (19/115)
2	6023388	G	C	Upf2	ENSMUST00000060092.12	c.2284G>C	p.Val762Leu	missense_variant	1	-	-	-	-	-	-	-	-	-	0.231 (28/125)
2	10575347	A	G	Sfmbt2	ENSMUST00000041105.6	c.1820A>G	p.Lys607Arg	missense_variant	1	-	-	-	-	-	-	-	-	-	0.222 (10/41)
2	11596768	C	A	Rbm17	ENSMUST00000040314.11	c.268G>T	p.Gly90Trp	missense_variant	1	-	-	-	-	-	-	-	-	-	0.256 (10/44)
2	11681931	C	A	Il2ra	ENSMUST00000028111.5	c.572C>A	p.Ala191Asp	missense_variant&splice_region_variant	1	-	-	-	-	-	-	-	-	-	0.26 (22/92)
2	11681931	C	A	Gm37881	ENSMUST00000193001.1	n.-1195C>A		upstream_gene_variant	1	-	-	-	-	-	-	-	-	-	0.26 (22/92)
2	12110990	A	C	Itga8	ENSMUST00000028106.10	c.3087T>G	p.Thr1029Thr	synonymous_variant	1	-	-	-	-	-	-	-	-	-	0.254 (22/77)
2	12247518	A	C	Itga8	ENSMUST00000028106.10	c.880T>G	p.Phe294Val	missense_variant	1	-	-	-	-	-	-	-	-	-	0.479 (90/188)
2	12262136	C	A	Itga8	ENSMUST00000028106.10	c.487G>T	p.Ala163Ser	missense_variant	1	-	-	-	-	-	-	-	-	-	0.25 (18/77)
2	13334779	A	G	Cubn	ENSMUST00000091436.6	c.6996T>C	p.Ser2332Ser	synonymous_variant	1	-	-	-	-	-	-	-	-	-	0.233 (26/106)
2	13381825	T	A	Cubn	ENSMUST00000091436.6	c.4628A>T	p.Glu1543Val	missense_variant	1	-	-	-	-	-	-	-	-	-	0.257 (23/82)
2	13696853	G	C	St8sia6	ENSMUST00000003509.9	c.352C>G	p.Gln118Glu	missense_variant	1	-	-	-	-	-	-	-	-	-	0.222 (44/200)
2	14035795	C	A	Hacd1	ENSMUST00000074854.8	c.648G>T	p.Met216Ile	missense_variant	1	-	-	-	-	-	-	-	-	-	0.181 (18/102)
2	14035795	C	A	Gm37894	ENSMUST00000195416.1	n.*2030G>T		downstream_gene_variant	1	-	-	-	-	-	-	-	-	-	0.181 (18/102)
2	14116013	T	G	Stam	ENSMUST00000102960.10	c.237T>G	p.Ile79Met	missense_variant	1	-	-	-	-	-	-	-	-	-	0.254 (59/235)
2	14128564	G	T	Stam	ENSMUST00000102960.10	c.463G>T	p.Ala155Ser	missense_variant	1	-	-	-	-	-	-	-	-	-	0.188 (9/58)
2	14452090	T	A	Slc39a12	ENSMUST00000082290.7	c.1888T>A	p.Trp630Arg	missense_variant	1	-	-	-	-	-	-	-	-	-	0.212 (36/169)
2	16565403	G	A	Plxdc2	ENSMUST00000028081.12	c.539G>A	p.Gly180Glu	missense_variant&splice_region_variant	1	-	-	-	-	-	-	-	-	-	0.208 (28/155)
2	16650086	T	A	Plxdc2	ENSMUST00000028081.12	c.665-23T>A		intron_variant	1	-	-	-	-	-	-	-	-	-	0.216 (18/87)
2	18046738	C	T	Skida1	ENSMUST00000091420.5	c.1602G>A	p.Leu534Leu	synonymous_variant	1	-	-	-	-	-	-	-	-	-	0.171 (13/78)
2	18293987	C	T	Dnajc1	ENSMUST00000091418.11	c.775G>A	p.Ala259Thr	missense_variant	1	-	-	-	-	-	-	-	-	-	0.125 (12/87)
2	18853226	A	G	Pip4k2a	ENSMUST00000006912.11	c.679-300T>C		intron_variant	1	-	-	-	-	-	-	-	-	-	0.284 (54/183)
2	19238628	C	A	Armc3	ENSMUST00000114640.8	c.167-13C>A		intron_variant	1	-	-	-	-	-	-	-	-	-	0.175 (17/94)
2	20290061	T	A	Etl4	ENSMUST00000114627.7	c.35+20T>A		intron_variant	1	-	-	-	-	-	-	-	-	-	0.21 (16/78)
2	21553289	T	C	Gpr158	ENSMUST00000055946.7	c.1009-10T>C		intron_variant	1	-	-	-	-	-	-	-	-	-	0.109 (15/137)
2	21810690	G	T	Gpr158	ENSMUST00000055946.7	c.1892+1G>T		splice_donor_variant&intron_variant	1	-	-	-	-	-	-	-	-	-	0.258 (20/75)
2	22396187	A	T	Myo3a	ENSMUST00000044749.13	c.1801-35A>T		intron_variant	1	-	-	-	-	-	-	-	-	-	0.5 (32/63)
2	23162517	G	T	Yme1l1	ENSMUST00000028117.3	c.182G>T	p.Arg61Met	missense_variant	1	-	-	-	-	-	-	-	-	-	0.2 (11/57)
2	23193184	A	C	Yme1l1	ENSMUST00000028117.3	c.1661A>C	p.Asp554Ala	missense_variant	1	-	-	-	-	-	-	-	-	-	0.224 (15/69)
2	23537579	C	T	Spopl	ENSMUST00000132484.6	c.540G>A	p.Lys180Lys	synonymous_variant	1	-	-	-	-	-	-	-	-	-	0.21 (14/75)
2	24421407	C	A	Pax8	ENSMUST00000028355.10	c.*141G>T		3_prime_UTR_variant	1	-	-	-	-	-	-	-	-	-	0.333 (8/24)
2	24617749	G	C	Cacna1b	ENSMUST00000100348.9	c.5550C>G	p.Leu1850Leu	synonymous_variant	1	-	-	-	-	-	-	-	-	-	0.203 (13/83)
2	24626884	A	T	Cacna1b	ENSMUST00000100348.9	c.5199-1550T>A		intron_variant	1	-	-	-	-	-	-	-	-	-	0.175 (13/73)
2	25081785	C	A	Noxa1	ENSMUST00000044018.7	c.*3939G>T		downstream_gene_variant	1	-	-	-	-	-	-	-	-	-	0.591 (13/22)
2	25081785	C	A	Entpd8	ENSMUST00000044078.9	c.-11-26C>A		intron_variant	1	-	-	-	-	-	-	-	-	-	0.591 (13/22)
2	25090273	T	A	Noxa1	ENSMUST00000044018.7	c.509A>T	p.Gln170Leu	missense_variant	1	-	-	-	-	-	-	-	-	-	0.323 (25/77)
2	25090273	T	A	Entpd8	ENSMUST00000044078.9	c.*5121T>A		downstream_gene_variant	1	-	-	-	-	-	-	-	-	-	0.323 (25/77)
2	25297907	GCT	G	Grin1	ENSMUST00000114310.9	c.1574_1575delAG	p.Glu525fs	frameshift_variant	1	-	-	-	-	-	-	-	-	-	0.216 (10/51)
2	25297907	GCT	G	Grin1os	ENSMUST00000129723.1	n.1877_1878delTC		non_coding_transcript_exon_variant	1	-	-	-	-	-	-	-	-	-	0.216 (10/51)
2	25344983	G	C	Man1b1	ENSMUST00000042390.4	c.809G>C	p.Arg270Thr	missense_variant	1	-	-	-	-	-	-	-	-	-	0.263 (42/148)
2	25361713	T	A	Uap1l1	ENSMUST00000102925.3	c.1458A>T	p.Arg486Arg	synonymous_variant	1	-	-	-	-	-	-	-	-	-	0.55 (13/22)
2	25444110	G	T	Abca2	ENSMUST00000102919.3	c.5398G>T	p.Val1800Leu	missense_variant	1	-	-	-	-	-	-	-	-	-	0.354 (21/57)
2	25444110	G	T	Mir3087	ENSMUST00000199405.1	n.*1276G>T		downstream_gene_variant	1	-	-	-	-	-	-	-	-	-	0.354 (21/57)
2	25537144	C	A	Traf2	ENSMUST00000114234.1	c.215G>T	p.Gly72Val	missense_variant	1	-	-	-	-	-	-	-	-	-	0.22 (14/62)
2	25701080	AAC	A	Obp2a	ENSMUST00000077667.3	c.225_226delCA	p.Asn75fs	frameshift_variant	1	-	-	-	-	-	-	-	-	-	0.101 (13/136)
2	25701080	AAC	A	A230005M16Rik	ENSMUST00000137661.1	n.*4768_*4769delGT		downstream_gene_variant	1	-	-	-	-	-	-	-	-	-	0.101 (13/136)
2	25778024	G	A	Gm13539	ENSMUST00000211245.1	c.-4233G>A		upstream_gene_variant	1	-	-	-	-	-	-	-	-	-	0.224 (16/70)
2	25778024	G	A	Lcn11	ENSMUST00000091278.5	c.234-41G>A		intron_variant	1	-	-	-	-	-	-	-	-	-	0.224 (16/70)
2	25778988	G	T	Lcn11	ENSMUST00000091278.5	c.308-1G>T		splice_acceptor_variant&intron_variant	1	-	-	-	-	-	-	-	-	-	0.107 (16/148)
2	25778988	G	T	Gm13539	ENSMUST00000211245.1	c.-3269G>T		upstream_gene_variant	1	-	-	-	-	-	-	-	-	-	0.107 (16/148)
2	25778988	G	T	Gm13538	ENSMUST00000143166.1	n.*4952C>A		downstream_gene_variant	1	-	-	-	-	-	-	-	-	-	0.107 (16/148)
2	25906796	G	C	Kcnt1	ENSMUST00000037580.12	c.2426G>C	p.Arg809Pro	missense_variant	1	-	-	-	-	-	-	-	-	-	0.172 (8/39)
2	25936637	T	G	Camsap1	ENSMUST00000114167.8	c.3780A>C	p.Ala1260Ala	synonymous_variant	1	-	-	-	-	-	-	-	-	-	0.293 (16/51)
2	25936639	C	T	Camsap1	ENSMUST00000114167.8	c.3778G>A	p.Ala1260Thr	missense_variant	1	-	-	-	-	-	-	-	-	-	0.293 (16/49)
2	26203987	G	T	Lhx3	ENSMUST00000028302.7	c.229C>A	p.Arg77Ser	missense_variant	1	-	-	-	-	-	-	-	-	-	0.25 (8/38)
2	26203987	G	T	Gm27196	ENSMUST00000184787.1	n.-2715G>T		upstream_gene_variant	1	-	-	-	-	-	-	-	-	-	0.25 (8/38)
2	26281507	G	T	Ccdc187	ENSMUST00000057224.3	c.958C>A	p.Gln320Lys	missense_variant	1	-	-	-	-	-	-	-	-	-	0.222 (11/42)
2	26326181	G	T	Gpsm1	ENSMUST00000066889.12	c.1062-33G>T		intron_variant	1	-	-	-	-	-	-	-	-	-	0.304 (8/25)
2	26368222	C	A	Snapc4	ENSMUST00000114115.8	c.2185G>T	p.Ala729Ser	missense_variant	1	-	-	-	-	-	-	-	-	-	0.235 (9/43)
2	26368222	C	A	Gm13562	ENSMUST00000125198.1	n.88-1379C>A		intron_variant	1	-	-	-	-	-	-	-	-	-	0.235 (9/43)
2	26438748	T	A	Sec16a	ENSMUST00000114082.8	c.3254A>T	p.Gln1085Leu	missense_variant	1	-	-	-	-	-	-	-	-	-	0.265 (15/53)
2	26848258	C	G	Abo	ENSMUST00000114045.8	c.139G>C	p.Val47Leu	missense_variant	1	-	-	-	-	-	-	-	-	-	0.159 (14/92)
2	26935299	C	A	Stkld1	ENSMUST00000055406.8	c.-24C>A		5_prime_UTR_variant	1	-	-	-	-	-	-	-	-	-	0.183 (15/75)
2	26935299	C	A	Surf4	ENSMUST00000015011.9	c.-1977G>T		upstream_gene_variant	1	-	-	-	-	-	-	-	-	-	0.183 (15/75)
2	26955506	C	A	Rexo4	ENSMUST00000114020.9	c.1168G>T	p.Glu390*	stop_gained	1	-	-	-	-	-	-	-	-	-	0.171 (16/101)
2	26955506	C	A	Stkld1	ENSMUST00000055406.8	c.*2115C>A		downstream_gene_variant	1	-	-	-	-	-	-	-	-	-	0.171 (16/101)
2	27081720	C	A	Adamtsl2	ENSMUST00000091233.6	c.16C>A	p.Gln6Lys	missense_variant	1	-	-	-	-	-	-	-	-	-	0.308 (15/51)
2	27104717	G	C	Adamtsl2	ENSMUST00000091233.6	c.2434-32G>C		intron_variant	1	-	-	-	-	-	-	-	-	-	0.393 (14/35)
2	27177727	T	A	Dbh	ENSMUST00000000910.6	c.1361T>A	p.Leu454Gln	missense_variant	1	-	-	-	-	-	-	-	-	-	0.147 (11/86)
2	27234331	C	A	Sardh	ENSMUST00000102886.9	c.1113G>T	p.Val371Val	synonymous_variant	1	-	-	-	-	-	-	-	-	-	0.214 (8/35)
2	27234331	C	A	Sardhos	ENSMUST00000170435.1	n.189-303C>A		intron_variant	1	-	-	-	-	-	-	-	-	-	0.214 (8/35)
2	27459694	GC	G	Brd3	ENSMUST00000113941.8	c.845delG	p.Gly282fs	frameshift_variant	1	-	-	-	-	-	-	-	-	-	0.22 (12/50)
2	27965678	G	T	Col5a1	ENSMUST00000028280.13	c.1827+28G>T		intron_variant	1	-	-	-	-	-	-	-	-	-	0.24 (12/51)
2	28001541	G	T	Col5a1	ENSMUST00000028280.13	c.2953-29G>T		intron_variant	1	-	-	-	-	-	-	-	-	-	0.262 (15/54)
2	28465155	G	T	1700007K13Rik	ENSMUST00000086370.10	c.297C>A	p.Pro99Pro	synonymous_variant	1	-	-	-	-	-	-	-	-	-	0.23 (18/82)
2	28465155	G	T	Mrps2	ENSMUST00000038600.3	c.-2945G>T		upstream_gene_variant	1	-	-	-	-	-	-	-	-	-	0.23 (18/82)
2	28675643	T	G	Tsc1	ENSMUST00000113869.7	c.1325-20T>G		intron_variant	1	-	-	-	-	-	-	-	-	-	0.359 (15/42)
2	29071337	G	T	Ttf1	ENSMUST00000100237.3	c.1736G>T	p.Arg579Leu	missense_variant	1	-	-	-	-	-	-	-	-	-	0.233 (18/73)
2	29146576	G	T	Setx	ENSMUST00000061578.8	c.3072G>T	p.Gln1024His	missense_variant	1	-	-	-	-	-	-	-	-	-	0.234 (19/87)
2	29996231	G	GA	Sptan1	ENSMUST00000129241.2	c.2408dupA	p.Glu804fs	frameshift_variant	1	-	-	-	-	-	-	-	-	-	0.194 (8/47)
2	29996231	G	GA	Mir6997	ENSMUST00000184313.1	n.*211_*212insA		downstream_gene_variant	1	-	-	-	-	-	-	-	-	-	0.194 (8/47)
2	30187732	G	T	Kyat1	ENSMUST00000044038.9	c.524C>A	p.Thr175Asn	missense_variant	1	-	-	-	-	-	-	-	-	-	0.231 (18/78)
2	30336292	C	T	Nup188	ENSMUST00000064447.11	c.3352-32C>T		intron_variant	1	-	-	-	-	-	-	-	-	-	0.565 (49/84)
2	31019818	G	C	Usp20	ENSMUST00000102849.10	c.2449G>C	p.Ala817Pro	missense_variant	1	-	-	-	-	-	-	-	-	-	0.267 (14/53)
2	31344029	G	C	Hmcn2	ENSMUST00000113532.8	c.805G>C	p.Asp269His	missense_variant	1	-	-	-	-	-	-	-	-	-	0.306 (16/45)
2	31689827	A	C	Abl1	ENSMUST00000075759.12	c.21A>C	p.Lys7Asn	missense_variant	1	-	-	-	-	-	-	-	-	-	0.186 (10/56)
2	31689827	A	C	Gm13427	ENSMUST00000154296.1	n.-1358T>G		upstream_gene_variant	1	-	-	-	-	-	-	-	-	-	0.186 (10/56)
2	32010258	G	T	Nup214	ENSMUST00000065398.12	c.2598G>T	p.Arg866Ser	missense_variant	1	-	-	-	-	-	-	-	-	-	0.197 (14/75)
2	32096228	G	T	Plpp7	ENSMUST00000057423.5	c.417G>T	p.Leu139Leu	synonymous_variant	1	-	-	-	-	-	-	-	-	-	0.333 (8/20)
2	32315371	A	C	Gm23363	ENSMUST00000175024.3	n.-2894A>C		upstream_gene_variant	1	-	-	-	-	-	-	-	-	-	0.169 (11/72)
2	32315371	A	C	Mir199b	ENSMUST00000175066.1	n.-3089A>C		upstream_gene_variant	1	-	-	-	-	-	-	-	-	-	0.169 (11/72)
2	32315371	A	C	Dnm1	ENSMUST00000139624.7	c.1894-24T>G		intron_variant	1	-	-	-	-	-	-	-	-	-	0.169 (11/72)
2	32686556	C	G	Fpgs	ENSMUST00000028148.10	c.1058G>C	p.Arg353Pro	missense_variant&splice_region_variant	1	-	-	-	-	-	-	-	-	-	0.178 (10/57)
2	32686556	C	G	Eng	ENSMUST00000009705.13	c.*4995C>G		downstream_gene_variant	1	-	-	-	-	-	-	-	-	-	0.178 (10/57)
2	32686556	C	G	Mir8093	ENSMUST00000185043.1	n.*1074G>C		downstream_gene_variant	1	-	-	-	-	-	-	-	-	-	0.178 (10/57)
2	32692660	C	T	Fpgs	ENSMUST00000028148.10	c.200G>A	p.Arg67His	missense_variant	1	-	-	-	-	-	-	-	-	-	0.389 (15/39)
2	32692660	C	T	Mir8093	ENSMUST00000185043.1	n.-4894G>A		upstream_gene_variant	1	-	-	-	-	-	-	-	-	-	0.389 (15/39)
2	32941814	C	G	Lrsam1	ENSMUST00000028132.13	c.1148G>C	p.Arg383Pro	missense_variant	1	-	-	-	-	-	-	-	-	-	0.214 (10/52)
2	33015188	C	A	Garnl3	ENSMUST00000137381.7	c.1498G>T	p.Glu500*	stop_gained&splice_region_variant	1	-	-	-	-	-	-	-	-	-	0.228 (24/116)
2	33462252	C	G	Zbtb43	ENSMUST00000095035.2	c.88+14G>C		intron_variant	1	-	-	-	-	-	-	-	-	-	0.198 (26/144)
2	33874370	A	T	Mvb12b	ENSMUST00000041555.9	c.166T>A	p.Ser56Thr	missense_variant	1	-	-	-	-	-	-	-	-	-	0.2 (10/60)
2	35006273	T	A	Hc	ENSMUST00000028233.6	c.3499-2A>T		splice_acceptor_variant&intron_variant	1	-	-	-	-	-	-	-	-	-	0.241 (26/115)
2	35006273	T	A	Gm13449	ENSMUST00000153559.1	n.122-5536T>A		intron_variant	1	-	-	-	-	-	-	-	-	-	0.241 (26/115)
2	35186707	C	A	Rab14	ENSMUST00000028238.14	c.318G>T	p.Leu106Phe	missense_variant	1	-	-	-	-	-	-	-	-	-	0.165 (25/180)
2	35708868	G	T	Dab2ip	ENSMUST00000091010.11	c.571G>T	p.Asp191Tyr	missense_variant	1	-	-	-	-	-	-	-	-	-	0.2 (13/55)
2	36240776	G	T	Ptgs1	ENSMUST00000062069.5	c.686G>T	p.Gly229Val	missense_variant&splice_region_variant	1	-	-	-	-	-	-	-	-	-	0.255 (28/107)
2	36569540	G	C	Olfr344	ENSMUST00000075474.1	c.*11G>C		downstream_gene_variant	1	-	-	-	-	-	-	-	-	-	0.212 (12/61)
2	36569540	G	C	Olfr344-Olfr345	ENSMUSG00000096822-ENSMUSG00000059251	n.36569540G>C		intergenic_region	1	-	-	-	-	-	-	-	-	-	0.212 (12/61)
2	36907701	C	A	Olfr354	ENSMUST00000068475.3	c.754C>A	p.Leu252Ile	missense_variant	1	-	-	-	-	-	-	-	-	-	0.271 (21/76)
2	36907701	C	A	Gm13440	ENSMUST00000121665.1	n.-1394C>A		upstream_gene_variant	1	-	-	-	-	-	-	-	-	-	0.271 (21/76)
2	36927201	G	C	Olfr355	ENSMUST00000100147.1	c.912C>G	p.Leu304Leu	synonymous_variant	1	-	-	-	-	-	-	-	-	-	0.207 (21/121)
2	37085636	C	G	Olfr361	ENSMUST00000100145.1	c.111G>C	p.Met37Ile	missense_variant	1	-	-	-	-	-	-	-	-	-	0.168 (17/106)
2	37085636	C	G	Gm13437	ENSMUST00000122434.1	n.-3181G>C		upstream_gene_variant	1	-	-	-	-	-	-	-	-	-	0.168 (17/106)
2	37085636	C	G	Gm13434	ENSMUST00000126779.1	n.*2652G>C		downstream_gene_variant	1	-	-	-	-	-	-	-	-	-	0.168 (17/106)
2	37105636	G	A	Olfr362	ENSMUST00000100144.1	c.13C>T	p.Pro5Ser	missense_variant	1	-	-	-	-	-	-	-	-	-	0.281 (12/41)
2	37105636	G	A	Olfr363-ps	ENSMUST00000119049.1	n.*621C>T		downstream_gene_variant	1	-	-	-	-	-	-	-	-	-	0.281 (12/41)
2	38021398	C	A	Dennd1a	ENSMUST00000102787.9	c.576G>T	p.Leu192Leu	synonymous_variant	1	-	-	-	-	-	-	-	-	-	0.299 (26/98)
2	38021398	C	A	Gm44283	ENSMUST00000204461.1	n.-2231G>T		upstream_gene_variant	1	-	-	-	-	-	-	-	-	-	0.299 (26/98)
2	38021398	C	A	Gm44443	ENSMUST00000204396.1	n.-4397C>A		upstream_gene_variant	1	-	-	-	-	-	-	-	-	-	0.299 (26/98)
2	38740415	C	T	Nr6a1	ENSMUST00000076275.10	c.834G>A	p.Leu278Leu	synonymous_variant	1	-	-	-	-	-	-	-	-	-	0.314 (19/60)
2	40677506	A	C	Lrp1b	ENSMUST00000052550.12	c.12208T>G	p.Leu4070Val	missense_variant	1	-	-	-	-	-	-	-	-	-	0.245 (34/135)
2	40697582	T	A	Lrp1b	ENSMUST00000052550.12	c.11660A>T	p.Asp3887Val	missense_variant	1	-	-	-	-	-	-	-	-	-	0.509 (34/68)
2	40922383	C	A	Lrp1b	ENSMUST00000052550.12	c.7551G>T	p.Glu2517Asp	missense_variant	1	-	-	-	-	-	-	-	-	-	0.214 (10/47)
2	41728710	G	T	Lrp1b	ENSMUST00000052550.12	c.693C>A	p.Asn231Lys	missense_variant	1	-	-	-	-	-	-	-	-	-	0.242 (18/76)
2	43628949	C	T	Kynu	ENSMUST00000028223.8	c.733-4C>T		splice_region_variant&intron_variant	1	-	-	-	-	-	-	-	-	-	0.135 (17/137)
2	43890371	C	A	Arhgap15	ENSMUST00000055776.7	c.409-57C>A		intron_variant	1	-	-	-	-	-	-	-	-	-	0.145 (25/171)
2	49279308	A	C	Mbd5	ENSMUST00000047413.9	c.4490A>C	p.Asn1497Thr	missense_variant	1	-	-	-	-	-	-	-	-	-	0.556 (22/40)
2	49535300	G	T	Epc2	ENSMUST00000092123.10	c.1186G>T	p.Gly396Cys	missense_variant	1	-	-	-	-	-	-	-	-	-	0.216 (16/64)
2	52047414	T	G	Tnfaip6	ENSMUST00000065927.5	c.233-17T>G		intron_variant	1	-	-	-	-	-	-	-	-	-	0.111 (11/101)
2	52249338	C	G	Neb	ENSMUST00000036934.11	c.9264G>C	p.Leu3088Leu	synonymous_variant	1	-	-	-	-	-	-	-	-	-	0.239 (49/219)
2	52267782	C	G	Neb	ENSMUST00000036934.11	c.6812G>C	p.Trp2271Ser	missense_variant	1	-	-	-	-	-	-	-	-	-	0.244 (23/98)
2	52279631	C	T	Neb	ENSMUST00000036934.11	c.5436+1G>A		splice_donor_variant&intron_variant	1	-	-	-	-	-	-	-	-	-	0.214 (12/51)
2	52279631	C	T	Gm22095	ENSMUST00000158984.1	n.-3446C>T		upstream_gene_variant	1	-	-	-	-	-	-	-	-	-	0.214 (12/51)
2	52304013	G	A	Neb	ENSMUST00000036934.11	c.1983+17C>T		intron_variant	1	-	-	-	-	-	-	-	-	-	0.273 (43/170)
2	52467278	T	C	Cacnb4	ENSMUST00000078324.6	c.561A>G	p.Val187Val	synonymous_variant	1	-	-	-	-	-	-	-	-	-	0.185 (15/88)
2	52675812	C	A	Cacnb4	ENSMUST00000078324.6	c.61-1G>T		splice_acceptor_variant&intron_variant	1	-	-	-	-	-	-	-	-	-	0.5 (15/31)
2	53144875	C	G	Prpf40a	ENSMUST00000076313.12	c.2300G>C	p.Arg767Pro	missense_variant	1	-	-	-	-	-	-	-	-	-	0.333 (8/24)
2	57108111	AT	A	Nr4a2	ENSMUST00000028166.8	c.*44delA		3_prime_UTR_variant	1	-	-	-	-	-	-	-	-	-	0.568 (23/40)
2	58479868	C	A	Acvr1	ENSMUST00000056376.11	c.128G>T	p.Gly43Val	missense_variant	1	-	-	-	-	-	-	-	-	-	0.281 (10/34)
2	58790087	C	G	Upp2	ENSMUST00000059102.12	c.924C>G	p.Ser308Ser	synonymous_variant	1	-	-	-	-	-	-	-	-	-	0.217 (19/82)
2	58827696	G	T	Ccdc148	ENSMUST00000077687.5	c.1297-3C>A		splice_region_variant&intron_variant	1	-	-	-	-	-	-	-	-	-	0.2 (9/46)
2	58907023	G	T	Ccdc148	ENSMUST00000077687.5	c.1060-550C>A		intron_variant	1	-	-	-	-	-	-	-	-	-	0.164 (11/67)
2	58907023	G	T	Gm11099	ENSMUST00000112589.2	c.40-518G>T		intron_variant	1	-	-	-	-	-	-	-	-	-	0.164 (11/67)
2	59342244	G	C	Pkp4	ENSMUST00000102754.10	c.2725+1G>C		splice_donor_variant&intron_variant	1	-	-	-	-	-	-	-	-	-	0.535 (30/56)
2	59795995	C	T	Tanc1	ENSMUST00000037526.10	c.1695C>T	p.Gly565Gly	synonymous_variant	1	-	-	-	-	-	-	-	-	-	0.579 (13/23)
2	60232380	T	G	2017-03-07	ENSMUST00000067542.14	c.517+13T>G		intron_variant	1	-	-	-	-	-	-	-	-	-	0.25 (8/35)
2	60611468	G	C	Itgb6	ENSMUST00000028348.8	c.1997C>G	p.Ser666Cys	missense_variant	1	-	-	-	-	-	-	-	-	-	0.179 (21/111)
2	62211379	T	A	Slc4a10	ENSMUST00000112480.2	c.302T>A	p.Phe101Tyr	missense_variant	1	-	-	-	-	-	-	-	-	-	0.352 (24/65)
2	62244416	G	C	Slc4a10	ENSMUST00000112480.2	c.923G>C	p.Gly308Ala	missense_variant	1	-	-	-	-	-	-	-	-	-	0.131 (10/76)
2	62267500	G	A	Slc4a10	ENSMUST00000112480.2	c.1542G>A	p.Leu514Leu	synonymous_variant	1	-	-	-	-	-	-	-	-	-	0.147 (17/121)
2	62617469	T	G	Ifih1	ENSMUST00000028259.11	c.890A>C	p.Gln297Pro	missense_variant	1	-	-	-	-	-	-	-	-	-	0.256 (15/61)
2	63183975	C	A	Kcnh7	ENSMUST00000075052.9	c.76+27G>T		intron_variant	1	-	-	-	-	-	-	-	-	-	0.189 (12/46)
2	65363939	C	A	Slc38a11	ENSMUST00000112420.7	c.-20G>T		5_prime_UTR_variant	1	-	-	-	-	-	-	-	-	-	0.143 (10/62)
2	65363939	C	A	Mir6337	ENSMUST00000184194.1	n.*357G>T		downstream_gene_variant	1	-	-	-	-	-	-	-	-	-	0.143 (10/62)
2	65482214	C	A	Scn3a	ENSMUST00000066432.11	c.3636G>T	p.Val1212Val	synonymous_variant	1	-	-	-	-	-	-	-	-	-	0.191 (33/166)
2	65484413	G	T	Scn3a	ENSMUST00000066432.11	c.3303C>A	p.Pro1101Pro	synonymous_variant	1	-	-	-	-	-	-	-	-	-	0.282 (29/98)
2	65495295	C	A	Scn3a	ENSMUST00000066432.11	c.2877G>T	p.Val959Val	synonymous_variant	1	-	-	-	-	-	-	-	-	-	0.17 (18/112)
2	65498866	C	A	Scn3a	ENSMUST00000066432.11	c.2418+1G>T		splice_donor_variant&intron_variant	1	-	-	-	-	-	-	-	-	-	0.296 (8/33)
2	65751868	A	C	Scn2a1	ENSMUST00000028377.13	c.4559A>C	p.Lys1520Thr	missense_variant	1	-	-	-	-	-	-	-	-	-	0.202 (31/161)
2	66325950	T	A	Scn1a	ENSMUST00000112366.7	c.1614A>T	p.Ile538Ile	synonymous_variant	1	-	-	-	-	-	-	-	-	-	0.156 (11/74)
2	66326128	A	G	Scn1a	ENSMUST00000112366.7	c.1436T>C	p.Leu479Pro	missense_variant	1	-	-	-	-	-	-	-	-	-	0.37 (18/49)
2	66692666	A	T	Scn7a	ENSMUST00000042792.6	c.2699-6T>A		splice_region_variant&intron_variant	1	-	-	-	-	-	-	-	-	-	0.195 (20/99)
2	67511393	C	T	Xirp2	ENSMUST00000028410.3	c.3977C>T	p.Thr1326Ile	missense_variant	1	-	-	-	-	-	-	-	-	-	0.107 (11/89)
2	67511393	C	T	Gm13601	ENSMUST00000142314.1	n.168+4965G>A		intron_variant	1	-	-	-	-	-	-	-	-	-	0.107 (11/89)
2	67514579	C	A	Xirp2	ENSMUST00000028410.3	c.7163C>A	p.Ala2388Asp	missense_variant	1	-	-	-	-	-	-	-	-	-	0.22 (14/59)
2	67514579	C	A	Gm13601	ENSMUST00000142314.1	n.168+1779G>T		intron_variant	1	-	-	-	-	-	-	-	-	-	0.22 (14/59)
2	68119608	GT	G	B3galt1	ENSMUST00000042456.3	c.*695delT		3_prime_UTR_variant	1	-	-	-	-	-	-	-	-	-	0.288 (23/82)
2	68119773	A	T	B3galt1	ENSMUST00000042456.3	c.*850A>T		3_prime_UTR_variant	1	-	-	-	-	-	-	-	-	-	0.256 (23/91)
2	68392198	C	A	Stk39	ENSMUST00000102715.3	c.521G>T	p.Gly174Val	missense_variant	1	-	-	-	-	-	-	-	-	-	0.205 (20/87)
2	68613088	CA	C	4933409G03Rik	ENSMUST00000102713.9	c.606+34delA		intron_variant	1	-	-	-	-	-	-	-	-	-	0.381 (10/25)
2	69156468	G	C	Nostrin	ENSMUST00000041865.7	c.342+14G>C		intron_variant	1	-	-	-	-	-	-	-	-	-	0.236 (18/82)
2	69273992	G	T	Abcb11	ENSMUST00000102709.7	c.2343+6C>A		splice_region_variant&intron_variant	1	-	-	-	-	-	-	-	-	-	0.241 (18/70)
2	69273992	G	T	Gm13613	ENSMUST00000126240.1	n.*1501G>T		downstream_gene_variant	1	-	-	-	-	-	-	-	-	-	0.241 (18/70)
2	69291981	C	A	Abcb11	ENSMUST00000102709.7	c.1157G>T	p.Gly386Val	missense_variant	1	-	-	-	-	-	-	-	-	-	0.157 (12/68)
2	69480042	C	G	Lrp2	ENSMUST00000080953.11	c.8186G>C	p.Gly2729Ala	missense_variant	1	-	-	-	-	-	-	-	-	-	0.182 (13/68)
2	69507881	A	T	Lrp2	ENSMUST00000080953.11	c.3554T>A	p.Val1185Glu	missense_variant&splice_region_variant	1	-	-	-	-	-	-	-	-	-	0.133 (11/86)
2	70476968	C	T	Sp5	ENSMUST00000100043.2	c.996C>T	p.Phe332Phe	synonymous_variant	1	-	-	-	-	-	-	-	-	-	0.364 (11/27)
2	70591095	T	C	Gad1	ENSMUST00000094934.10	c.1117-11T>C		intron_variant	1	-	-	-	-	-	-	-	-	-	0.483 (40/87)
2	71247884	G	T	Dync1i2	ENSMUST00000112140.7	c.934G>T	p.Val312Leu	missense_variant	1	-	-	-	-	-	-	-	-	-	0.179 (20/111)
2	71816807	C	A	Itga6	ENSMUST00000112101.7	c.307+53C>A		intron_variant	1	-	-	-	-	-	-	-	-	-	0.185 (12/62)
2	72970167	C	G	Sp3	ENSMUST00000102689.9	c.1633G>C	p.Asp545His	missense_variant	1	-	-	-	-	-	-	-	-	-	0.121 (12/106)
2	72970167	C	G	Gm11084	ENSMUST00000112062.1	c.*1381G>C		downstream_gene_variant	1	-	-	-	-	-	-	-	-	-	0.121 (12/106)
2	73910950	C	A	Atp5g3	ENSMUST00000018914.2	c.39+5G>T		splice_region_variant&intron_variant	1	-	-	-	-	-	-	-	-	-	0.182 (11/57)
2	75679164	T	A	Nfe2l2	ENSMUST00000102672.4	c.311A>T	p.Gln104Leu	missense_variant&splice_region_variant	1	-	-	-	-	-	-	-	-	-	0.356 (17/49)
2	75981785	C	T	Ttc30a1	ENSMUST00000099994.4	c.-48G>A		5_prime_UTR_variant	1	-	-	-	-	-	-	-	-	-	0.364 (25/69)
2	75981785	C	T	Ttc30a2	ENSMUST00000099995.4	c.-3619G>A		upstream_gene_variant	1	-	-	-	-	-	-	-	-	-	0.364 (25/69)
2	76194905	C	T	Pde11a	ENSMUST00000099992.9	c.1351G>A	p.Ala451Thr	missense_variant	1	-	-	-	-	-	-	-	-	-	0.257 (24/99)
2	76706654	T	G	Ttn	ENSMUST00000099981.8	c.104886+43A>C		intron_variant	1	-	-	-	-	-	-	-	-	-	0.5 (12/26)
2	76710585	T	C	Ttn	ENSMUST00000099981.8	c.102056A>G	p.Lys34019Arg	missense_variant	1	-	-	-	-	-	-	-	-	-	0.218 (12/64)
2	76719752	A	G	Ttn	ENSMUST00000099981.8	c.95084T>C	p.Val31695Ala	missense_variant	1	-	-	-	-	-	-	-	-	-	0.203 (16/78)
2	76719752	A	G	Gm13938	ENSMUST00000156809.1	n.-3024A>G		upstream_gene_variant	1	-	-	-	-	-	-	-	-	-	0.203 (16/78)
2	76736567	G	T	Ttn	ENSMUST00000099981.8	c.83981C>A	p.Thr27994Asn	missense_variant	1	-	-	-	-	-	-	-	-	-	0.279 (23/78)
2	76736567	G	T	Gm13938	ENSMUST00000156809.1	n.72+13720G>T		intron_variant	1	-	-	-	-	-	-	-	-	-	0.279 (23/78)
2	76742835	G	A	Ttn	ENSMUST00000099981.8	c.77713C>T	p.Pro25905Ser	missense_variant	1	-	-	-	-	-	-	-	-	-	0.128 (12/95)
2	76742835	G	A	Gm13938	ENSMUST00000156809.1	n.72+19988G>A		intron_variant	1	-	-	-	-	-	-	-	-	-	0.128 (12/95)
2	76743364	G	T	Ttn	ENSMUST00000099981.8	c.77184C>A	p.Ala25728Ala	synonymous_variant	1	-	-	-	-	-	-	-	-	-	0.221 (41/180)
2	76743364	G	T	Gm13938	ENSMUST00000156809.1	n.72+20517G>T		intron_variant	1	-	-	-	-	-	-	-	-	-	0.221 (41/180)
2	76749922	C	T	Ttn	ENSMUST00000099981.8	c.70626G>A	p.Val23542Val	synonymous_variant	1	-	-	-	-	-	-	-	-	-	0.165 (19/114)
2	76749922	C	T	Gm13938	ENSMUST00000156809.1	n.73-24518C>T		intron_variant	1	-	-	-	-	-	-	-	-	-	0.165 (19/114)
2	76756069	A	G	Ttn	ENSMUST00000099981.8	c.65317T>C	p.Leu21773Leu	synonymous_variant	1	-	-	-	-	-	-	-	-	-	0.224 (26/115)
2	76756069	A	G	Gm13938	ENSMUST00000156809.1	n.73-18371A>G		intron_variant	1	-	-	-	-	-	-	-	-	-	0.224 (26/115)
2	76770600	T	G	Ttn	ENSMUST00000099981.8	c.56437A>C	p.Thr18813Pro	missense_variant	1	-	-	-	-	-	-	-	-	-	0.219 (23/112)
2	76770600	T	G	Gm13938	ENSMUST00000156809.1	n.73-3840T>G		intron_variant	1	-	-	-	-	-	-	-	-	-	0.219 (23/112)
2	76771236	C	G	Ttn	ENSMUST00000099981.8	c.55983G>C	p.Thr18661Thr	synonymous_variant	1	-	-	-	-	-	-	-	-	-	0.188 (28/151)
2	76771236	C	G	Gm13938	ENSMUST00000156809.1	n.73-3204C>G		intron_variant	1	-	-	-	-	-	-	-	-	-	0.188 (28/151)
2	76784743	C	A	Ttn	ENSMUST00000099981.8	c.50630G>T	p.Gly16877Val	missense_variant	1	-	-	-	-	-	-	-	-	-	0.175 (18/98)
2	76784743	C	A	Gm13938	ENSMUST00000156809.1	n.269-348C>A		intron_variant	1	-	-	-	-	-	-	-	-	-	0.175 (18/98)
2	76795945	T	A	Ttn	ENSMUST00000099981.8	c.44865A>T	p.Ala14955Ala	synonymous_variant	1	-	-	-	-	-	-	-	-	-	0.209 (27/111)
2	76799115	A	G	Ttn	ENSMUST00000099981.8	c.42981T>C	p.Ser14327Ser	synonymous_variant	1	-	-	-	-	-	-	-	-	-	0.153 (18/125)
2	76812886	C	A	Ttn	ENSMUST00000099981.8	c.39687+1G>T		splice_donor_variant&intron_variant	1	-	-	-	-	-	-	-	-	-	0.256 (11/43)
2	76833265	G	A	Ttn	ENSMUST00000099981.8	c.35065C>T	p.Leu11689Phe	missense_variant	1	-	-	-	-	-	-	-	-	-	0.121 (9/64)
2	76861103	G	T	Ttn	ENSMUST00000099981.8	c.30514C>A	p.Pro10172Thr	missense_variant	1	-	-	-	-	-	-	-	-	-	0.132 (23/167)
2	76873865	C	A	Ttn	ENSMUST00000099981.8	c.27819G>T	p.Glu9273Asp	missense_variant	1	-	-	-	-	-	-	-	-	-	0.261 (21/81)
2	76876625	C	A	Ttn	ENSMUST00000099981.8	c.27221G>T	p.Trp9074Leu	missense_variant	1	-	-	-	-	-	-	-	-	-	0.276 (16/69)
2	76884591	A	G	Ttn	ENSMUST00000099981.8	c.24038T>C	p.Val8013Ala	missense_variant	1	-	-	-	-	-	-	-	-	-	0.202 (28/127)
2	76894783	C	T	Ttn	ENSMUST00000099981.8	c.18766G>A	p.Val6256Met	missense_variant	1	-	-	-	-	-	-	-	-	-	0.18 (19/113)
2	76901637	C	A	Ttn	ENSMUST00000099981.8	c.14255G>T	p.Trp4752Leu	missense_variant	1	-	-	-	-	-	-	-	-	-	0.207 (17/98)
2	76918409	G	T	Ttn	ENSMUST00000099981.8	c.10378+3142C>A		intron_variant	1	-	-	-	-	-	-	-	-	-	0.223 (27/140)
2	76936595	A	C	Ttn	ENSMUST00000099981.8	c.9323+40T>G		intron_variant	1	-	-	-	-	-	-	-	-	-	0.054 (10/199)
2	76941904	G	A	Ttn	ENSMUST00000099981.8	c.7791C>T	p.Val2597Val	synonymous_variant	1	-	-	-	-	-	-	-	-	-	0.2 (16/87)
2	76951659	G	A	Ttn	ENSMUST00000099981.8	c.3158C>T	p.Thr1053Ile	missense_variant	1	-	-	-	-	-	-	-	-	-	0.222 (17/75)
2	76969928	A	C	Ttn	ENSMUST00000099981.8	c.935T>G	p.Ile312Ser	missense_variant	1	-	-	-	-	-	-	-	-	-	0.625 (21/31)
2	77896319	T	C	Cwc22	ENSMUST00000065889.9	c.2415A>G	p.Arg805Arg	synonymous_variant	1	-	-	-	-	-	-	-	-	-	0.092 (13/144)
2	79368765	C	A	Cerkl	ENSMUST00000143974.1	c.480G>T	p.Gln160His	missense_variant	1	-	-	-	-	-	-	-	-	-	0.129 (10/71)
2	79663306	A	C	Ssfa2	ENSMUST00000111785.8	c.3654+542A>C		intron_variant	1	-	-	-	-	-	-	-	-	-	0.17 (8/61)
2	79875191	C	T	Pde1a	ENSMUST00000102653.7	c.1052+38G>A		intron_variant	1	-	-	-	-	-	-	-	-	-	0.185 (29/140)
2	79906028	G	T	Pde1a	ENSMUST00000102653.7	c.360C>A	p.Ser120Arg	missense_variant	1	-	-	-	-	-	-	-	-	-	0.078 (10/124)
2	80294041	C	T	Prdx6b	ENSMUST00000057072.5	c.*518C>T		3_prime_UTR_variant	1	-	-	-	-	-	-	-	-	-	0.316 (22/66)
2	80502198	A	G	Gm13687	ENSMUST00000119857.1	n.*2687A>G		downstream_gene_variant	1	-	-	-	-	-	-	-	-	-	0.254 (20/78)
2	80502198	A	G	Nckap1	ENSMUST00000111760.2	c.3288+27T>C		intron_variant	1	-	-	-	-	-	-	-	-	-	0.254 (20/78)
2	82257727	G	T	Zfp804a	ENSMUST00000047527.7	c.1899G>T	p.Leu633Leu	synonymous_variant	1	-	-	-	-	-	-	-	-	-	0.29 (12/37)
2	82950962	C	T	Fsip2	ENSMUST00000143764.8	c.699C>T	p.Asp233Asp	synonymous_variant	1	-	-	-	-	-	-	-	-	-	0.222 (13/61)
2	82989665	G	T	Fsip2	ENSMUST00000143764.8	c.15741G>T	p.Met5247Ile	missense_variant	1	-	-	-	-	-	-	-	-	-	0.283 (17/64)
2	82998143	C	A	Fsip2	ENSMUST00000143764.8	c.20283C>A	p.Val6761Val	synonymous_variant	1	-	-	-	-	-	-	-	-	-	0.258 (35/143)
2	84609069	C	A	Ctnnd1	ENSMUST00000111694.7	c.2441G>T	p.Arg814Leu	missense_variant	1	-	-	-	-	-	-	-	-	-	0.137 (8/59)
2	84609069	C	A	Gm28635	ENSMUST00000189772.1	c.2441G>T	p.Arg814Leu	missense_variant	1	-	-	-	-	-	-	-	-	-	0.137 (8/59)
2	84609070	GA	G	Ctnnd1	ENSMUST00000111694.7	c.2439delT	p.Arg814fs	frameshift_variant	1	-	-	-	-	-	-	-	-	-	0.137 (8/57)
2	84609070	GA	G	Gm28635	ENSMUST00000189772.1	c.2439delT	p.Arg814fs	frameshift_variant	1	-	-	-	-	-	-	-	-	-	0.137 (8/57)
2	84829875	C	T	Timm10	ENSMUST00000028470.9	c.157C>T	p.Arg53*	stop_gained	1	-	-	-	-	-	-	-	-	-	0.214 (9/47)
2	84849872	A	G	Slc43a1	ENSMUST00000028469.13	c.461+29A>G		intron_variant	1	-	-	-	-	-	-	-	-	-	0.275 (13/45)
2	85331893	C	T	Olfr987	ENSMUST00000099929.2	c.4G>A	p.Glu2Lys	missense_variant	1	-	-	-	-	-	-	-	-	-	0.225 (20/93)
2	85429911	T	G	Olfr994	ENSMUST00000099925.1	c.917A>C	p.Lys306Thr	missense_variant	1	-	-	-	-	-	-	-	-	-	0.135 (14/112)
2	85494266	A	C	4833423E24Rik	ENSMUST00000099923.1	c.751-36T>G		intron_variant	1	-	-	-	-	-	-	-	-	-	0.174 (11/55)
2	85518462	C	T	4833423E24Rik	ENSMUST00000099923.1	c.305G>A	p.Arg102Gln	missense_variant	1	-	-	-	-	-	-	-	-	-	0.222 (16/65)
2	85770147	T	A	Olfr1013	ENSMUST00000065626.2	c.345T>A	p.Ala115Ala	synonymous_variant	1	-	-	-	-	-	-	-	-	-	0.246 (29/121)
2	85868671	C	A	Olfr1022	ENSMUST00000054736.3	c.78C>A	p.Ile26Ile	synonymous_variant	1	-	-	-	-	-	-	-	-	-	0.222 (39/187)
2	85868671	C	A	Olfr1021-ps1	ENSMUST00000121914.1	n.*4310C>A		downstream_gene_variant	1	-	-	-	-	-	-	-	-	-	0.222 (39/187)
2	85886795	TA	T	Gm24037	ENSMUST00000082871.1	n.-1462delT		upstream_gene_variant	1	-	-	-	-	-	-	-	-	-	0.212 (25/108)
2	85886795	TA	T	Olfr1023	ENSMUST00000056408.1	c.-6delA		upstream_gene_variant	1	-	-	-	-	-	-	-	-	-	0.212 (25/108)
2	85886795	TA	T	Gm24037-Olfr1023	ENSMUSG00000064805-ENSMUSG00000050128	n.85886796delA		intergenic_region	1	-	-	-	-	-	-	-	-	-	0.212 (25/108)
2	85976168	C	G	Olfr1029	ENSMUST00000082191.3	c.924C>G	p.Asn308Lys	missense_variant	1	-	-	-	-	-	-	-	-	-	0.091 (15/184)
2	86122707	G	A	Olfr1038-ps	ENSMUST00000149775.1	n.783G>A		non_coding_transcript_exon_variant	1	-	-	-	-	-	-	-	-	-	0.243 (20/80)
2	86162714	C	G	Olfr1043	ENSMUST00000099907.1	c.234G>C	p.Thr78Thr	synonymous_variant	1	-	-	-	-	-	-	-	-	-	0.32 (25/80)
2	86162714	C	G	Olfr1042	ENSMUST00000099908.3	c.-2346G>C		upstream_gene_variant	1	-	-	-	-	-	-	-	-	-	0.32 (25/80)
2	86171537	G	A	Olfr1044	ENSMUST00000099906.1	c.279C>T	p.Ser93Ser	synonymous_variant	1	-	-	-	-	-	-	-	-	-	0.23 (23/96)
2	86236458	C	T	Olfr1048	ENSMUST00000099900.1	c.376G>A	p.Ala126Thr	missense_variant	1	-	-	-	-	-	-	-	-	-	0.173 (19/111)
2	86298226	T	C	Olfr1052	ENSMUST00000054746.3	c.409T>C	p.Ser137Pro	missense_variant	1	-	-	-	-	-	-	-	-	-	0.58 (87/152)
2	86332706	A	T	Olfr1054	ENSMUST00000099895.1	c.649T>A	p.Tyr217Asn	missense_variant	1	-	-	-	-	-	-	-	-	-	0.182 (11/62)
2	86332706	A	T	Gm13719	ENSMUST00000122018.1	n.-4137T>A		upstream_gene_variant	1	-	-	-	-	-	-	-	-	-	0.182 (11/62)
2	86375115	G	C	Olfr1057	ENSMUST00000099892.1	c.296C>G	p.Thr99Arg	missense_variant	1	-	-	-	-	-	-	-	-	-	0.136 (33/221)
2	86413528	T	A	Olfr1061	ENSMUST00000099889.1	c.523A>T	p.Ser175Cys	missense_variant	1	-	-	-	-	-	-	-	-	-	0.217 (35/162)
2	86423374	G	C	Olfr1062	ENSMUST00000105213.3	c.301C>G	p.Leu101Val	missense_variant	1	-	-	-	-	-	-	-	-	-	0.207 (48/228)
2	86677193	C	A	Olfr1086	ENSMUST00000099878.1	c.139G>T	p.Val47Phe	missense_variant	1	-	-	-	-	-	-	-	-	-	0.203 (13/68)
2	86785794	C	A	Olfr1093	ENSMUST00000055273.1	c.63C>A	p.Ala21Ala	synonymous_variant	1	-	-	-	-	-	-	-	-	-	0.191 (19/102)
2	86828774	T	G	Olfr1094	ENSMUST00000105211.2	c.21T>G	p.Gly7Gly	synonymous_variant	1	-	-	-	-	-	-	-	-	-	0.163 (11/59)
2	86850940	T	G	Olfr1095	ENSMUST00000099874.1	c.757A>C	p.Ser253Arg	missense_variant	1	-	-	-	-	-	-	-	-	-	0.286 (28/94)
2	87002610	T	A	Olfr1102	ENSMUST00000055129.4	c.640T>A	p.Cys214Ser	missense_variant	1	-	-	-	-	-	-	-	-	-	0.265 (40/146)
2	87002611	G	T	Olfr1102	ENSMUST00000055129.4	c.641G>T	p.Cys214Phe	missense_variant	1	-	-	-	-	-	-	-	-	-	0.265 (40/147)
2	87033487	G	T	Olfr1105	ENSMUST00000099868.1	c.733C>A	p.Leu245Ile	missense_variant	1	-	-	-	-	-	-	-	-	-	0.176 (10/54)
2	87093224	G	T	Olfr1109	ENSMUST00000099863.1	c.172C>A	p.Pro58Thr	missense_variant	1	-	-	-	-	-	-	-	-	-	0.17 (22/129)
2	87213279	T	G	Olfr1113	ENSMUST00000079966.3	c.386T>G	p.Leu129Arg	missense_variant	1	-	-	-	-	-	-	-	-	-	0.06 (12/195)
2	87357494	C	T	Olfr1120	ENSMUST00000058737.3	c.49C>T	p.Gln17*	stop_gained	1	-	-	-	-	-	-	-	-	-	0.2 (14/58)
2	87544621	A	C	Olfr1128	ENSMUST00000102624.1	c.922T>G	p.Leu308Val	missense_variant	1	-	-	-	-	-	-	-	-	-	0.182 (38/208)
2	87544621	A	C	Gm13740	ENSMUST00000120590.1	n.*2272T>G		downstream_gene_variant	1	-	-	-	-	-	-	-	-	-	0.182 (38/208)
2	87646087	T	C	Olfr1133	ENSMUST00000099855.1	c.35A>G	p.Glu12Gly	missense_variant	1	-	-	-	-	-	-	-	-	-	0.11 (11/106)
2	87693151	G	T	Olfr1136	ENSMUST00000099852.4	c.730C>A	p.His244Asn	missense_variant	1	-	-	-	-	-	-	-	-	-	0.253 (25/105)
2	87783024	C	A	Olfr152	ENSMUST00000090709.1	c.489C>A	p.His163Gln	missense_variant	1	-	-	-	-	-	-	-	-	-	0.197 (15/72)
2	87903678	T	G	Olfr1154	ENSMUST00000099844.1	c.-4A>C		upstream_gene_variant	1	-	-	-	-	-	-	-	-	-	0.24 (28/117)
2	87903678	T	G	Olfr1154-Olfr1155	ENSMUSG00000075146-ENSMUSG00000075145	n.87903678T>G		intergenic_region	1	-	-	-	-	-	-	-	-	-	0.24 (28/117)
2	87943209	G	T	Olfr1155	ENSMUST00000099843.1	c.418C>A	p.Gln140Lys	missense_variant	1	-	-	-	-	-	-	-	-	-	0.278 (18/65)
2	87943467	T	G	Olfr1155	ENSMUST00000099843.1	c.160A>C	p.Asn54His	missense_variant	1	-	-	-	-	-	-	-	-	-	0.265 (28/113)
2	87989877	T	C	Olfr1158	ENSMUST00000102622.1	c.-236T>C		upstream_gene_variant	1	-	-	-	-	-	-	-	-	-	0.529 (14/26)
2	87989877	T	C	Olfr74-Olfr1158	ENSMUSG00000075142-ENSMUSG00000062793	n.87989877T>C		intergenic_region	1	-	-	-	-	-	-	-	-	-	0.529 (14/26)
2	88093334	A	T	Olfr1164	ENSMUST00000099834.3	c.601T>A	p.Cys201Ser	missense_variant	1	-	-	-	-	-	-	-	-	-	0.167 (9/56)
2	88185071	T	C	Olfr1168	ENSMUST00000079599.3	c.193T>C	p.Ser65Pro	missense_variant	1	-	-	-	-	-	-	-	-	-	0.26 (45/170)
2	88392033	C	A	Olfr1178	ENSMUST00000075640.1	c.785C>A	p.Thr262Lys	missense_variant	1	-	-	-	-	-	-	-	-	-	0.118 (13/99)
2	88392227	T	C	Olfr1178	ENSMUST00000075640.1	c.*7T>C		downstream_gene_variant	1	-	-	-	-	-	-	-	-	-	0.288 (20/69)
2	88392227	T	C	Olfr1178-Olfr1179	ENSMUSG00000056995-ENSMUSG00000075127	n.88392227T>C		intergenic_region	1	-	-	-	-	-	-	-	-	-	0.288 (20/69)
2	88411986	G	T	Olfr1180	ENSMUST00000099824.3	c.671C>A	p.Pro224His	missense_variant	1	-	-	-	-	-	-	-	-	-	0.173 (21/111)
2	88462114	C	A	Olfr1183	ENSMUST00000102618.1	c.773C>A	p.Pro258Gln	missense_variant	1	-	-	-	-	-	-	-	-	-	0.143 (14/106)
2	88755797	T	G	Olfr1199	ENSMUST00000099813.1	c.877A>C	p.Lys293Gln	missense_variant	1	-	-	-	-	-	-	-	-	-	0.159 (13/84)
2	88755797	T	G	Gm13760	ENSMUST00000124021.1	n.*854A>C		downstream_gene_variant	1	-	-	-	-	-	-	-	-	-	0.159 (13/84)
2	88831578	T	A	Olfr1205	ENSMUST00000076438.1	c.460T>A	p.Ser154Thr	missense_variant	1	-	-	-	-	-	-	-	-	-	0.5 (109/223)
2	88864810	T	G	Olfr1206	ENSMUST00000077302.1	c.204T>G	p.Asp68Glu	missense_variant	1	-	-	-	-	-	-	-	-	-	0.159 (32/208)
2	88897061	A	T	Olfr1208	ENSMUST00000099810.3	c.535T>A	p.Phe179Ile	missense_variant	1	-	-	-	-	-	-	-	-	-	0.237 (32/132)
2	89074438	C	A	Olfr1219	ENSMUST00000099797.1	c.652G>T	p.Gly218Cys	missense_variant	1	-	-	-	-	-	-	-	-	-	0.199 (45/244)
2	89124977	G	A	Olfr1222	ENSMUST00000099794.1	c.753C>T	p.Val251Val	synonymous_variant	1	-	-	-	-	-	-	-	-	-	0.505 (49/103)
2	89156467	A	G	Olfr1224-ps1	ENSMUST00000099792.1	c.707T>C	p.Leu236Pro	missense_variant	1	-	-	-	-	-	-	-	-	-	0.596 (137/232)
2	89193406	G	A	Olfr1226	ENSMUST00000099790.1	c.627C>T	p.Ile209Ile	synonymous_variant	1	-	-	-	-	-	-	-	-	-	0.223 (58/269)
2	89249051	A	G	Olfr1228	ENSMUST00000190757.1	c.642T>C	p.Ser214Ser	synonymous_variant	1	-	-	-	-	-	-	-	-	-	0.093 (24/275)
2	89282897	T	TG	Olfr1229	ENSMUST00000111549.1	c.297dupC	p.Lys100fs	frameshift_variant	1	-	-	-	-	-	-	-	-	-	0.155 (9/65)
2	89296953	C	T	Olfr1230	ENSMUST00000099787.1	c.316G>A	p.Gly106Ser	missense_variant	1	-	-	-	-	-	-	-	-	-	0.231 (21/99)
2	89440083	A	G	Olfr1240	ENSMUST00000187363.1	c.195T>C	p.Ser65Ser	synonymous_variant	1	-	-	-	-	-	-	-	-	-	0.233 (48/201)
2	89844942	C	G	Olfr48	ENSMUST00000099762.1	c.30G>C	p.Val10Val	synonymous_variant	1	-	-	-	-	-	-	-	-	-	0.096 (11/116)
2	90003048	T	A	Olfr1262	ENSMUST00000061701.3	c.641T>A	p.Val214Glu	missense_variant	1	-	-	-	-	-	-	-	-	-	0.227 (37/162)
2	90905644	T	G	Ndufs3	ENSMUST00000005647.3	c.-997A>C		upstream_gene_variant	1	-	-	-	-	-	-	-	-	-	0.349 (18/50)
2	90905644	T	G	Ptpmt1	ENSMUST00000125001.8	n.*3072A>C		downstream_gene_variant	1	-	-	-	-	-	-	-	-	-	0.349 (18/50)
2	90905644	T	G	Kbtbd4	ENSMUST00000111464.7	c.20-22T>G		intron_variant	1	-	-	-	-	-	-	-	-	-	0.349 (18/50)
2	91036598	C	G	Rapsn	ENSMUST00000050323.5	c.244C>G	p.Leu82Val	missense_variant	1	-	-	-	-	-	-	-	-	-	0.204 (11/60)
2	91140638	G	T	Mybpc3	ENSMUST00000169776.1	c.*4524G>T		downstream_gene_variant	1	-	-	-	-	-	-	-	-	-	0.181 (14/77)
2	91140638	G	T	Madd	ENSMUST00000077941.12	c.4678-12C>A		intron_variant	1	-	-	-	-	-	-	-	-	-	0.181 (14/77)
2	91159272	C	A	Madd	ENSMUST00000077941.12	c.3446G>T	p.Gly1149Val	missense_variant	1	-	-	-	-	-	-	-	-	-	0.213 (13/55)
2	91190940	C	A	Nr1h3	ENSMUST00000002177.8	c.501G>T	p.Leu167Leu	synonymous_variant	1	-	-	-	-	-	-	-	-	-	0.205 (10/47)
2	91190940	C	A	Gm13783	ENSMUST00000131634.1	n.*4966G>T		downstream_gene_variant	1	-	-	-	-	-	-	-	-	-	0.205 (10/47)
2	91596148	A	T	Ckap5	ENSMUST00000099716.10	c.4028-214A>T		intron_variant	1	-	-	-	-	-	-	-	-	-	0.222 (12/56)
2	91596148	A	T	Snord67	ENSMUST00000104033.1	n.79A>T		non_coding_transcript_exon_variant	1	-	-	-	-	-	-	-	-	-	0.222 (12/56)
2	91650214	C	T	Arhgap1	ENSMUST00000111331.8	c.80C>T	p.Ala27Val	missense_variant	1	-	-	-	-	-	-	-	-	-	0.286 (16/51)
2	91650214	C	T	Zfp408	ENSMUST00000099714.9	c.-465G>A		upstream_gene_variant	1	-	-	-	-	-	-	-	-	-	0.286 (16/51)
2	91824551	G	C	Ambra1	ENSMUST00000045705.13	c.2423+11G>C		intron_variant	1	-	-	-	-	-	-	-	-	-	0.186 (17/99)
2	91900539	G	T	Ambra1	ENSMUST00000045705.13	c.3021G>T	p.Arg1007Arg	synonymous_variant	1	-	-	-	-	-	-	-	-	-	0.19 (14/74)
2	92370198	G	C	Gyltl1b	ENSMUST00000111284.8	c.335C>G	p.Thr112Arg	missense_variant	1	-	-	-	-	-	-	-	-	-	0.239 (20/81)
2	94117426	C	A	Hsd17b12	ENSMUST00000028619.4	c.207+4G>T		splice_region_variant&intron_variant	1	-	-	-	-	-	-	-	-	-	0.18 (14/84)
2	101643259	C	A	Rag1	ENSMUST00000078494.5	c.1537G>T	p.Gly513Cys	missense_variant	1	-	-	-	-	-	-	-	-	-	0.221 (19/80)
2	101643259	C	A	B230118H07Rik	ENSMUSG00000027165	n.101643259G>T		intragenic_variant	1	-	-	-	-	-	-	-	-	-	0.221 (19/80)
2	102400068	C	CA	Trim44	ENSMUST00000102573.7	c.616_617insT	p.Gly206fs	frameshift_variant	1	-	-	-	-	-	-	-	-	-	0.193 (19/103)
2	102611643	C	T	Pamr1	ENSMUST00000028612.7	c.576C>T	p.Ser192Ser	synonymous_variant	1	-	-	-	-	-	-	-	-	-	0.098 (8/81)
2	104104198	C	A	Cd59a	ENSMUST00000040423.11	c.10C>A	p.Gln4Lys	missense_variant	1	-	-	-	-	-	-	-	-	-	0.229 (52/245)
2	104154935	C	A	D430041D05Rik	ENSMUST00000141159.7	c.4575G>T	p.Leu1525Phe	missense_variant	1	-	-	-	-	-	-	-	-	-	0.212 (8/40)
2	104256856	C	A	D430041D05Rik	ENSMUST00000141159.7	c.544G>T	p.Ala182Ser	missense_variant	1	-	-	-	-	-	-	-	-	-	0.186 (15/74)
2	104256856	C	A	Gm13883	ENSMUST00000150450.1	n.185C>A		non_coding_transcript_exon_variant	1	-	-	-	-	-	-	-	-	-	0.186 (15/74)
2	105006753	T	A	Eif3m	ENSMUST00000028592.11	c.617+3A>T		splice_region_variant&intron_variant	1	-	-	-	-	-	-	-	-	-	0.19 (19/96)
2	105006753	T	A	Ccdc73	ENSMUSG00000045106	n.105006753T>A		intragenic_variant	1	-	-	-	-	-	-	-	-	-	0.19 (19/96)
2	105297939	C	T	Them7	ENSMUST00000068813.2	c.264C>T	p.Phe88Phe	synonymous_variant	1	-	-	-	-	-	-	-	-	-	0.448 (16/35)
2	105379002	A	G	Them7	ENSMUST00000068813.2	c.666A>G	p.Pro222Pro	synonymous_variant	1	-	-	-	-	-	-	-	-	-	0.6 (27/45)
2	106004338	A	C	Dnajc24	ENSMUST00000102555.10	c.-2302T>G		upstream_gene_variant	1	-	-	-	-	-	-	-	-	-	0.235 (17/75)
2	106004338	A	C	Dcdc5	ENSMUSG00000074981	n.106004338A>C		intragenic_variant	1	-	-	-	-	-	-	-	-	-	0.235 (17/75)
2	106384278	CT	C	Dcdc5	ENSMUST00000122388.8	n.4780+44delT		intron_variant	1	-	-	-	-	-	-	-	-	-	0.527 (36/71)
2	109318053	G	A	Kif18a	ENSMUST00000028527.7	c.1891G>A	p.Gly631Arg	missense_variant	1	-	-	-	-	-	-	-	-	-	0.258 (20/81)
2	109675279	G	A	Gm20638	ENSMUST00000175796.1	n.*1186G>A		downstream_gene_variant	1	-	-	-	-	-	-	-	-	-	0.388 (23/61)
2	109675279	G	A	Bdnf	ENSMUSG00000048482	n.109675279G>A		intragenic_variant	1	-	-	-	-	-	-	-	-	-	0.388 (23/61)
2	109675279	G	A	RP23-393E8.4	ENSMUST00000209925.1	n.599C>T		non_coding_transcript_exon_variant	1	-	-	-	-	-	-	-	-	-	0.388 (23/61)
2	110620241	G	C	Slc5a12	ENSMUST00000045972.12	c.822-42G>C		intron_variant	1	-	-	-	-	-	-	-	-	-	0.165 (17/108)
2	111057480	G	T	Gm13942	ENSMUST00000136950.1	n.95C>A		non_coding_transcript_exon_variant	1	-	-	-	-	-	-	-	-	-	0.164 (13/77)
2	111138949	C	T	Gm15130	ENSMUST00000132464.1	c.418+5G>A		splice_region_variant&intron_variant	1	-	-	-	-	-	-	-	-	-	0.224 (19/88)
2	111144587	A	G	Gm15130	ENSMUST00000132464.1	c.228+2T>C		splice_donor_variant&intron_variant	1	-	-	-	-	-	-	-	-	-	0.39 (19/51)
2	111379049	A	G	Olfr1284	ENSMUST00000209096.1	c.48A>G	p.Gly16Gly	synonymous_variant	1	-	-	-	-	-	-	-	-	-	0.182 (21/103)
2	111449784	C	A	Olfr1287	ENSMUST00000075390.1	c.643C>A	p.Leu215Met	missense_variant	1	-	-	-	-	-	-	-	-	-	0.198 (57/286)
2	111538285	C	A	Olfr1294	ENSMUST00000208334.1	c.3G>T	p.Met1?	start_lost	1	-	-	-	-	-	-	-	-	-	0.193 (18/100)
2	111621261	A	G	Olfr1297	ENSMUST00000099612.1	c.812T>C	p.Leu271Pro	missense_variant	1	-	-	-	-	-	-	-	-	-	0.283 (35/128)
2	111754613	C	T	Olfr1301	ENSMUST00000080094.1	c.363C>T	p.Asp121Asp	synonymous_variant	1	-	-	-	-	-	-	-	-	-	0.228 (47/221)
2	111814034	C	A	Olfr1303	ENSMUST00000099609.1	c.691G>T	p.Gly231Cys	missense_variant	1	-	-	-	-	-	-	-	-	-	0.184 (16/95)
2	111983753	A	C	Olfr1309	ENSMUST00000099604.3	c.344T>G	p.Val115Gly	missense_variant	1	-	-	-	-	-	-	-	-	-	0.25 (31/128)
2	111983753	A	C	Olfr1309	ENSMUST00000207885.1	c.320T>G	p.Val107Gly	missense_variant	1	-	-	-	-	-	-	-	-	-	0.25 (31/128)
2	112008457	T	A	Olfr1310	ENSMUST00000207169.1	c.728A>T	p.His243Leu	missense_variant	1	-	-	-	-	-	-	-	-	-	0.25 (18/57)
2	112156920	A	T	Olfr1318	ENSMUST00000058176.6	c.*5A>T		3_prime_UTR_variant	1	-	-	-	-	-	-	-	-	-	0.276 (9/33)
2	112243319	G	C	Nutm1	ENSMUST00000043970.1	c.*4869C>G		downstream_gene_variant	1	-	-	-	-	-	-	-	-	-	0.229 (9/39)
2	112243319	G	C	Lpcat4	ENSMUST00000028554.3	c.746+26G>C		intron_variant	1	-	-	-	-	-	-	-	-	-	0.229 (9/39)
2	112675920	G	T	Ryr3	ENSMUST00000091818.5	c.10356C>A	p.Asp3452Glu	missense_variant	1	-	-	-	-	-	-	-	-	-	0.283 (16/57)
2	112712374	C	A	Ryr3	ENSMUST00000091818.5	c.9489G>T	p.Trp3163Cys	missense_variant	1	-	-	-	-	-	-	-	-	-	0.25 (11/47)
2	112728924	G	T	Ryr3	ENSMUST00000091818.5	c.9114C>A	p.Ser3038Arg	missense_variant	1	-	-	-	-	-	-	-	-	-	0.226 (9/42)
2	112801462	GC	G	Ryr3	ENSMUST00000091818.5	c.6307-31delG		intron_variant	1	-	-	-	-	-	-	-	-	-	0.394 (15/38)
2	112910002	GAA	G	Ryr3	ENSMUST00000091818.5	c.1634-13_1634-12delTT		intron_variant	1	-	-	-	-	-	-	-	-	-	0.333 (21/65)
2	113366838	T	C	Fmn1	ENSMUST00000102547.9	c.1873+1009T>C		intron_variant	1	-	-	-	-	-	-	-	-	-	0.141 (30/218)
2	113595106	G	T	Fmn1	ENSMUST00000102547.9	c.3624G>T	p.Thr1208Thr	synonymous_variant	1	-	-	-	-	-	-	-	-	-	0.156 (17/126)
2	114047630	C	T	Actc1	ENSMUST00000090269.6	c.991-21G>A		intron_variant	1	-	-	-	-	-	-	-	-	-	0.258 (9/35)
2	114047630	C	T	A530058N18Rik	ENSMUST00000131299.7	n.454-9454C>T		intron_variant	1	-	-	-	-	-	-	-	-	-	0.258 (9/35)
2	114047632	T	G	Actc1	ENSMUST00000090269.6	c.991-23A>C		intron_variant	1	-	-	-	-	-	-	-	-	-	0.258 (9/34)
2	114047632	T	G	A530058N18Rik	ENSMUST00000131299.7	n.454-9452T>G		intron_variant	1	-	-	-	-	-	-	-	-	-	0.258 (9/34)
2	114051997	C	A	Actc1	ENSMUST00000090269.6	c.35G>T	p.Cys12Phe	missense_variant	1	-	-	-	-	-	-	-	-	-	0.412 (9/20)
2	114051997	C	A	C130080G10Rik	ENSMUST00000150005.7	n.-2399C>A		upstream_gene_variant	1	-	-	-	-	-	-	-	-	-	0.412 (9/20)
2	114051997	C	A	A530058N18Rik	ENSMUST00000131299.7	n.454-5087C>A		intron_variant	1	-	-	-	-	-	-	-	-	-	0.412 (9/20)
2	114108122	C	A	Aqr	ENSMUST00000043160.12	c.3848G>T	p.Arg1283Met	missense_variant	1	-	-	-	-	-	-	-	-	-	0.133 (11/95)
2	114109991	C	G	Aqr	ENSMUST00000043160.12	c.3673G>C	p.Ala1225Pro	missense_variant	1	-	-	-	-	-	-	-	-	-	0.195 (28/140)
2	117301974	A	T	Rasgrp1	ENSMUST00000102534.10	c.376T>A	p.Cys126Ser	missense_variant	1	-	-	-	-	-	-	-	-	-	0.243 (30/134)
2	118113479	A	T	Thbs1	ENSMUST00000039559.8	c.577A>T	p.Ser193Cys	missense_variant	1	-	-	-	-	-	-	-	-	-	0.333 (10/33)
2	118113479	A	T	Gm13986	ENSMUST00000148587.7	n.-2277T>A		upstream_gene_variant	1	-	-	-	-	-	-	-	-	-	0.333 (10/33)
2	118122922	T	G	Thbs1	ENSMUST00000039559.8	c.2819T>G	p.Val940Gly	missense_variant	1	-	-	-	-	-	-	-	-	-	0.229 (33/130)
2	118122922	T	G	Gm29233	ENSMUST00000190311.1	n.*529A>C		downstream_gene_variant	1	-	-	-	-	-	-	-	-	-	0.229 (33/130)
2	118451398	G	A	Eif2ak4	ENSMUST00000005233.11	c.3233-14G>A		intron_variant	1	-	-	-	-	-	-	-	-	-	0.206 (21/89)
2	118723128	T	A	Plcb2	ENSMUST00000102524.7	c.582A>T	p.Lys194Asn	missense_variant&splice_region_variant	1	-	-	-	-	-	-	-	-	-	0.167 (9/46)
2	118775829	GCCCCC	G	Disp2	ENSMUST00000037547.8	c.-10232_-10228delCCCCC		upstream_gene_variant	1	-	-	-	-	-	-	-	-	-	0.5 (12/16)
2	118775829	GCCCCC	G	Phgr1	ENSMUST00000130293.7	c.18+54_18+58delCCCCC		intron_variant	1	-	-	-	-	-	-	-	-	-	0.5 (12/16)
2	118922403	G	A	Bahd1	ENSMUST00000036578.6	c.2150G>A	p.Arg717His	missense_variant	1	-	-	-	-	-	-	-	-	-	0.409 (12/28)
2	118922403	G	A	Chst14	ENSMUST00000099546.5	c.-4249G>A		upstream_gene_variant	1	-	-	-	-	-	-	-	-	-	0.409 (12/28)
2	120062712	G	C	Sptbn5	ENSMUSG00000074899	n.120062712C>G		intragenic_variant	1	-	-	-	-	-	-	-	-	-	0.156 (15/99)
2	120304601	G	T	Pla2g4f	ENSMUST00000054651.7	c.1365C>A	p.Ser455Ser	synonymous_variant	1	-	-	-	-	-	-	-	-	-	0.313 (12/37)
2	120435322	A	G	Ganc	ENSMUST00000135074.1	c.1350A>G	p.Gln450Gln	synonymous_variant	1	-	-	-	-	-	-	-	-	-	0.177 (22/130)
2	120502953	T	A	Zfp106	ENSMUST00000055241.12	c.*7133A>T		downstream_gene_variant	1	-	-	-	-	-	-	-	-	-	0.188 (17/88)
2	120502953	T	A	Capn3	ENSMUST00000028749.13	c.2116-23T>A		intron_variant	1	-	-	-	-	-	-	-	-	-	0.188 (17/88)
2	120695818	C	A	Stard9	ENSMUST00000180041.7	c.2555C>A	p.Thr852Asn	missense_variant	1	-	-	-	-	-	-	-	-	-	0.185 (14/77)
2	120696612	C	T	Stard9	ENSMUST00000180041.7	c.3349C>T	p.His1117Tyr	missense_variant	1	-	-	-	-	-	-	-	-	-	0.186 (10/49)
2	120699875	G	T	Stard9	ENSMUST00000180041.7	c.6612G>T	p.Pro2204Pro	synonymous_variant	1	-	-	-	-	-	-	-	-	-	0.182 (15/74)
2	120990451	GC	G	Tmem62	ENSMUST00000067582.13	c.989delC	p.Pro330fs	frameshift_variant	1	-	-	-	-	-	-	-	-	-	0.162 (22/131)
2	121221221	C	A	Trp53bp1	ENSMUST00000110648.7	c.3083G>T	p.Cys1028Phe	missense_variant	1	-	-	-	-	-	-	-	-	-	0.19 (10/52)
2	121337866	A	C	Ppip5k1	ENSMUST00000052029.9	c.2054T>G	p.Leu685Arg	missense_variant	1	-	-	-	-	-	-	-	-	-	0.197 (12/69)
2	121375521	C	A	Strc	ENSMUST00000038389.14	c.2409G>T	p.Trp803Cys	missense_variant	1	-	-	-	-	-	-	-	-	-	0.203 (14/75)
2	121376849	C	A	Strc	ENSMUST00000038389.14	c.2040G>T	p.Thr680Thr	synonymous_variant	1	-	-	-	-	-	-	-	-	-	0.3 (10/32)
2	121407385	C	A	Catsper2	ENSMUST00000038073.4	c.513G>T	p.Trp171Cys	missense_variant	1	-	-	-	-	-	-	-	-	-	0.191 (13/56)
2	121407385	C	A	Gm14000	ENSMUST00000118670.1	n.*1912C>A		downstream_gene_variant	1	-	-	-	-	-	-	-	-	-	0.191 (13/56)
2	122126095	C	A	Patl2	ENSMUST00000028665.4	c.509+6G>T		splice_region_variant&intron_variant	1	-	-	-	-	-	-	-	-	-	0.27 (12/46)
2	122170105	G	T	Trim69	ENSMUST00000036089.7	c.582+8G>T		splice_region_variant&intron_variant	1	-	-	-	-	-	-	-	-	-	0.357 (12/31)
2	122170105	G	T	Patl2	ENSMUST00000028665.4	c.-266+8990C>A		intron_variant	1	-	-	-	-	-	-	-	-	-	0.357 (12/31)
2	122178813	CG	C	Trim69	ENSMUST00000036089.7	c.1356delG	p.Gln453fs	frameshift_variant	1	-	-	-	-	-	-	-	-	-	0.203 (19/82)
2	122178813	CG	C	Patl2	ENSMUST00000028665.4	c.-266+281delC		intron_variant	1	-	-	-	-	-	-	-	-	-	0.203 (19/82)
2	122296302	AC	A	Duoxa2	ENSMUST00000028656.1	c.-2738delC		upstream_gene_variant	1	-	-	-	-	-	-	-	-	-	0.615 (9/15)
2	122296302	AC	A	Duox2	ENSMUST00000053734.5	c.715+15delG		intron_variant	1	-	-	-	-	-	-	-	-	-	0.615 (9/15)
2	122451947	A	C	Slc28a2	ENSMUST00000028652.11	c.787-36A>C		intron_variant	1	-	-	-	-	-	-	-	-	-	0.25 (43/170)
2	122600842	A	G	Gatm	ENSMUST00000028624.8	c.676-13T>C		intron_variant	1	-	-	-	-	-	-	-	-	-	0.5 (37/78)
2	125387350	C	T	Fbn1	ENSMUST00000028633.12	c.1510G>A	p.Gly504Ser	missense_variant	1	-	-	-	-	-	-	-	-	-	0.296 (9/34)
2	127113525	C	A	Ncaph	ENSMUST00000110387.3	c.1677+35G>T		intron_variant	1	-	-	-	-	-	-	-	-	-	0.191 (16/83)
2	127186951	T	A	1810024B03Rik	ENSMUST00000056146.1	c.327A>T	p.Thr109Thr	synonymous_variant	1	-	-	-	-	-	-	-	-	-	0.281 (28/101)
2	127234975	G	T	Snrnp200	ENSMUST00000103220.3	c.4927G>T	p.Val1643Leu	missense_variant	1	-	-	-	-	-	-	-	-	-	0.254 (22/88)
2	127365907	T	G	Adra2b	ENSMUST00000071902.4	c.*981T>G		3_prime_UTR_variant	1	-	-	-	-	-	-	-	-	-	0.176 (10/56)
2	127430882	C	A	Gpat2	ENSMUST00000062211.3	c.513C>A	p.Phe171Leu	missense_variant	1	-	-	-	-	-	-	-	-	-	0.151 (10/64)
2	127638545	C	G	Mal	ENSMUST00000028854.14	c.387+44G>C		intron_variant	1	-	-	-	-	-	-	-	-	-	0.697 (28/42)
2	127829565	C	A	Bub1	ENSMUST00000028858.7	c.98G>T	p.Trp33Leu	missense_variant	1	-	-	-	-	-	-	-	-	-	0.099 (8/83)
2	128641418	C	A	Anapc1	ENSMUST00000014499.9	c.3756G>T	p.Ala1252Ala	synonymous_variant	1	-	-	-	-	-	-	-	-	-	0.286 (11/38)
2	128680468	G	A	Anapc1	ENSMUST00000014499.9	c.376-23C>T		intron_variant	1	-	-	-	-	-	-	-	-	-	0.315 (18/63)
2	128889729	T	C	Fbln7	ENSMUST00000028864.2	c.435T>C	p.Cys145Cys	synonymous_variant	1	-	-	-	-	-	-	-	-	-	0.38 (34/85)
2	128993109	T	C	Zc3h6	ENSMUST00000110320.8	c.214-50T>C		intron_variant	1	-	-	-	-	-	-	-	-	-	0.108 (24/205)
2	129016221	A	G	Zc3h6	ENSMUST00000110320.8	c.2171A>G	p.Asn724Ser	missense_variant	1	-	-	-	-	-	-	-	-	-	0.277 (15/56)
2	129016221	A	G	Gm14027	ENSMUST00000135186.1	n.-731A>G		upstream_gene_variant	1	-	-	-	-	-	-	-	-	-	0.277 (15/56)
2	129204100	T	G	Slc20a1	ENSMUST00000028880.9	c.615T>G	p.Phe205Leu	missense_variant	1	-	-	-	-	-	-	-	-	-	0.222 (60/256)
2	129204100	T	G	Gm4430	ENSMUST00000192413.1	n.-4906A>C		upstream_gene_variant	1	-	-	-	-	-	-	-	-	-	0.222 (60/256)
2	129204100	T	G	9830144P21Rik	ENSMUST00000127525.1	n.*1858A>C		downstream_gene_variant	1	-	-	-	-	-	-	-	-	-	0.222 (60/256)
2	129285362	C	A	Ckap2l	ENSMUST00000052708.6	c.895G>T	p.Asp299Tyr	missense_variant	1	-	-	-	-	-	-	-	-	-	0.129 (21/191)
2	130281542	T	A	Idh3b	ENSMUST00000028892.10	c.529-2A>T		splice_acceptor_variant&intron_variant	1	-	-	-	-	-	-	-	-	-	0.262 (21/72)
2	130281542	T	A	Nop56	ENSMUST00000103198.10	c.*2319T>A		downstream_gene_variant	1	-	-	-	-	-	-	-	-	-	0.262 (21/72)
2	130281542	T	A	Gm23187	ENSMUST00000175746.1	n.*4262T>A		downstream_gene_variant	1	-	-	-	-	-	-	-	-	-	0.262 (21/72)
2	130281542	T	A	Gm23650	ENSMUST00000083355.1	n.*3776T>A		downstream_gene_variant	1	-	-	-	-	-	-	-	-	-	0.262 (21/72)
2	130281542	T	A	Snord57	ENSMUST00000083338.1	n.*3455T>A		downstream_gene_variant	1	-	-	-	-	-	-	-	-	-	0.262 (21/72)
2	130946193	G	T	Atrn	ENSMUST00000028781.8	c.914G>T	p.Gly305Val	missense_variant	1	-	-	-	-	-	-	-	-	-	0.247 (22/92)
2	131172782	A	G	Spef1	ENSMUST00000028801.7	c.222-3T>C		splice_region_variant&intron_variant	1	-	-	-	-	-	-	-	-	-	0.302 (23/74)
2	131172782	A	G	Gm14232	ENSMUST00000137176.1	n.*1440A>G		downstream_gene_variant	1	-	-	-	-	-	-	-	-	-	0.302 (23/74)
2	131172782	A	G	Cenpb	ENSMUST00000089510.4	c.*5295T>C		downstream_gene_variant	1	-	-	-	-	-	-	-	-	-	0.302 (23/74)
2	131240401	G	T	Mavs	ENSMUST00000041362.11	c.204G>T	p.Trp68Cys	missense_variant	1	-	-	-	-	-	-	-	-	-	0.25 (12/45)
2	131520541	G	C	Smox	ENSMUST00000110186.8	c.739G>C	p.Ala247Pro	missense_variant	1	-	-	-	-	-	-	-	-	-	0.276 (10/41)
2	132452272	C	A	4921508D12Rik	ENSMUST00000124095.1	n.848C>A		non_coding_transcript_exon_variant	1	-	-	-	-	-	-	-	-	-	0.306 (18/56)
2	132827567	G	T	Mcm8	ENSMUST00000028831.14	c.955G>T	p.Gly319*	stop_gained	1	-	-	-	-	-	-	-	-	-	0.144 (23/141)
2	132906756	C	G	Fermt1	ENSMUST00000038280.4	c.1946G>C	p.Gly649Ala	missense_variant	1	-	-	-	-	-	-	-	-	-	0.123 (8/71)
2	132941943	G	T	Fermt1	ENSMUST00000038280.4	c.145C>A	p.Gln49Lys	missense_variant	1	-	-	-	-	-	-	-	-	-	0.174 (13/88)
2	135907504	T	G	Plcb4	ENSMUST00000035646.10	c.90T>G	p.Ser30Ser	synonymous_variant	1	-	-	-	-	-	-	-	-	-	0.72 (129/183)
2	135950345	C	T	Plcb4	ENSMUST00000035646.10	c.987C>T	p.Asn329Asn	synonymous_variant	1	-	-	-	-	-	-	-	-	-	0.084 (15/160)
2	136083246	A	C	Pak7	ENSMUST00000035264.8	c.2135T>G	p.Leu712Arg	missense_variant	1	-	-	-	-	-	-	-	-	-	0.167 (16/90)
2	137068154	A	C	Slx4ip	ENSMUST00000099311.8	c.1068A>C	p.Leu356Leu	synonymous_variant	1	-	-	-	-	-	-	-	-	-	0.111 (11/109)
2	139589649	G	C	Sptlc3	ENSMUST00000047370.2	c.1090G>C	p.Val364Leu	missense_variant	1	-	-	-	-	-	-	-	-	-	0.105 (12/120)
2	139589649	G	C	Gm27385	ENSMUST00000184747.1	n.*1319G>C		downstream_gene_variant	1	-	-	-	-	-	-	-	-	-	0.105 (12/120)
2	139589649	G	C	Gm14066	ENSMUST00000134801.1	n.130-15936C>G		intron_variant	1	-	-	-	-	-	-	-	-	-	0.105 (12/120)
2	139947176	G	A	Tasp1	ENSMUST00000046656.8	c.855C>T	p.Ser285Ser	synonymous_variant	1	-	-	-	-	-	-	-	-	-	0.123 (10/81)
2	141024090	T	A	Macrod2	ENSMUST00000078027.11	c.367T>A	p.Cys123Ser	missense_variant	1	-	-	-	-	-	-	-	-	-	0.137 (21/147)
2	143968527	C	A	Rrbp1	ENSMUST00000016072.11	c.2632G>T	p.Val878Leu	missense_variant	1	-	-	-	-	-	-	-	-	-	0.07 (8/89)
2	145640222	G	A	Slc24a3	ENSMUST00000110007.7	c.1799G>A	p.Gly600Asp	missense_variant	1	-	-	-	-	-	-	-	-	-	0.135 (9/66)
2	145876411	A	T	Rin2	ENSMUST00000110005.7	c.1810A>T	p.Met604Leu	missense_variant	1	-	-	-	-	-	-	-	-	-	0.105 (11/95)
2	145876411	A	T	Gm25026	ENSMUST00000175017.1	n.-1875A>T		upstream_gene_variant	1	-	-	-	-	-	-	-	-	-	0.105 (11/95)
2	145928262	C	A	Crnkl1	ENSMUST00000001818.4	c.660G>T	p.Lys220Asn	missense_variant	1	-	-	-	-	-	-	-	-	-	0.169 (13/79)
2	145951203	C	G	Cfap61	ENSMUST00000133433.7	c.566+19C>G		intron_variant	1	-	-	-	-	-	-	-	-	-	0.18 (38/194)
2	145963424	G	T	Cfap61	ENSMUST00000133433.7	c.693G>T	p.Val231Val	synonymous_variant	1	-	-	-	-	-	-	-	-	-	0.153 (20/122)
2	146334612	G	A	Ralgapa2	ENSMUST00000109986.8	c.5043C>T	p.Arg1681Arg	synonymous_variant	1	-	-	-	-	-	-	-	-	-	0.062 (16/226)
2	148800011	G	C	Cst8	ENSMUST00000028931.9	c.27G>C	p.Leu9Phe	missense_variant	1	-	-	-	-	-	-	-	-	-	0.138 (14/99)
2	151655232	G	T	Rad21l	ENSMUST00000180195.7	c.961C>A	p.Leu321Ile	missense_variant	1	-	-	-	-	-	-	-	-	-	0.094 (14/145)
2	152427954	C	A	6820408C15Rik	ENSMUST00000039961.11	c.25C>A	p.Pro9Thr	missense_variant	1	-	-	-	-	-	-	-	-	-	0.11 (26/245)
2	152508301	C	T	Defb26	ENSMUST00000099205.1	c.59-1G>A		splice_acceptor_variant&intron_variant	1	-	-	-	-	-	-	-	-	-	0.138 (15/100)
2	152573833	C	A	Defb21	ENSMUST00000070722.2	c.65C>A	p.Pro22His	missense_variant	1	-	-	-	-	-	-	-	-	-	0.159 (22/140)
2	152573833	C	A	Defb19	ENSMUST00000053180.3	c.*2330G>T		downstream_gene_variant	1	-	-	-	-	-	-	-	-	-	0.159 (22/140)
2	152573833	C	A	Gm17416	ENSMUST00000163724.1	c.*4295C>A		downstream_gene_variant	1	-	-	-	-	-	-	-	-	-	0.159 (22/140)
2	153136823	C	A	Hck	ENSMUST00000003370.13	c.955C>A	p.His319Asn	missense_variant	1	-	-	-	-	-	-	-	-	-	0.158 (13/76)
2	153203892	G	T	Tm9sf4	ENSMUST00000089027.2	c.1683G>T	p.Leu561Leu	synonymous_variant	1	-	-	-	-	-	-	-	-	-	0.145 (9/70)
2	153649149	G	T	Dnmt3b	ENSMUST00000056495.13	c.-12282G>T		upstream_gene_variant	1	-	-	-	-	-	-	-	-	-	0.141 (11/86)
2	153649149	G	T	Dnmt3bos	ENSMUST00000124988.1	n.259C>A		non_coding_transcript_exon_variant	1	-	-	-	-	-	-	-	-	-	0.141 (11/86)
2	153686425	G	T	Dnmt3b	ENSMUST00000056495.13	c.*26G>T		3_prime_UTR_variant	1	-	-	-	-	-	-	-	-	-	0.129 (14/104)
2	153781001	G	GT	Efcab8	ENSMUSG00000044083	n.153781001_153781002insT		intragenic_variant	1	-	-	-	-	-	-	-	-	-	0.196 (34/180)
2	153856255	G	A	Sun5	ENSMUST00000028982.4	c.1004C>T	p.Ser335Phe	missense_variant	1	-	-	-	-	-	-	-	-	-	0.169 (13/84)
2	153868182	C	A	Sun5	ENSMUST00000028982.4	c.197+37G>T		intron_variant	1	-	-	-	-	-	-	-	-	-	0.153 (13/101)
2	153910733	A	C	Bpifb6	ENSMUST00000088955.11	c.1152A>C	p.Glu384Asp	missense_variant	1	-	-	-	-	-	-	-	-	-	0.114 (15/154)
2	153942832	A	C	Bpifb4	ENSMUST00000109757.7	c.459A>C	p.Glu153Asp	missense_variant	1	-	-	-	-	-	-	-	-	-	0.293 (12/43)
2	153963551	T	G	Bpifb4	ENSMUST00000109757.7	c.1831-32T>G		intron_variant	1	-	-	-	-	-	-	-	-	-	0.101 (9/89)
2	154147701	C	A	Bpifa1	ENSMUST00000028985.7	c.796+13C>A		intron_variant	1	-	-	-	-	-	-	-	-	-	0.128 (14/97)
2	154531220	A	T	Cbfa2t2	ENSMUST00000045270.14	c.1298-2A>T		splice_acceptor_variant&intron_variant	1	-	-	-	-	-	-	-	-	-	0.133 (12/91)
2	154547150	T	G	Necab3	ENSMUST00000000895.12	c.503A>C	p.Asp168Ala	missense_variant	1	-	-	-	-	-	-	-	-	-	0.195 (12/49)
2	154547150	T	G	1700003F12Rik	ENSMUST00000109709.3	c.-1792T>G		upstream_gene_variant&intragenic_variant	1	-	-	-	-	-	-	-	-	-	0.195 (12/49)
2	154547150	T	G	Actl10	ENSMUST00000104928.1	c.-4980T>G		upstream_gene_variant	1	-	-	-	-	-	-	-	-	-	0.195 (12/49)
2	155045720	C	G	a	ENSMUST00000029123.2	c.99C>G	p.Asp33Glu	missense_variant	1	-	-	-	-	-	-	-	-	-	0.294 (12/38)
2	155421302	T	A	Ncoa6	ENSMUST00000043126.11	c.1211A>T	p.Gln404Leu	missense_variant	1	-	-	-	-	-	-	-	-	-	0.11 (12/119)
2	155422955	C	A	Ncoa6	ENSMUST00000043126.11	c.515-16G>T		intron_variant	1	-	-	-	-	-	-	-	-	-	0.097 (9/88)
2	155491078	T	A	Ggt7	ENSMUST00000029131.10	c.1864A>T	p.Arg622Trp	missense_variant	1	-	-	-	-	-	-	-	-	-	0.228 (25/123)
2	155491078	T	A	Gm14238	ENSMUST00000120227.1	n.-4709A>T		upstream_gene_variant	1	-	-	-	-	-	-	-	-	-	0.228 (25/123)
2	155499063	T	A	Ggt7	ENSMUST00000029131.10	c.1181A>T	p.Asn394Ile	missense_variant	1	-	-	-	-	-	-	-	-	-	0.695 (47/68)
2	155620730	AC	A	Mir499	ENSMUST00000102357.1	n.-2149delC		upstream_gene_variant	1	-	-	-	-	-	-	-	-	-	0.188 (8/36)
2	155620730	AC	A	Myh7b	ENSMUST00000092995.5	c.1148-46delC		intron_variant	1	-	-	-	-	-	-	-	-	-	0.188 (8/36)
2	155709051	G	C	Edem2	ENSMUST00000040833.4	c.995C>G	p.Ala332Gly	missense_variant	1	-	-	-	-	-	-	-	-	-	0.11 (13/108)
2	155815821	C	G	Mmp24	ENSMUST00000029141.5	c.1630C>G	p.Gln544Glu	missense_variant	1	-	-	-	-	-	-	-	-	-	0.179 (10/62)
2	155815821	C	G	BC029722	ENSMUST00000124586.1	c.*3104G>C		downstream_gene_variant	1	-	-	-	-	-	-	-	-	-	0.179 (10/62)
2	155815821	C	G	Eif6	ENSMUST00000029142.14	c.*4281G>C		downstream_gene_variant	1	-	-	-	-	-	-	-	-	-	0.179 (10/62)
2	156008430	A	G	Ergic3	ENSMUST00000088650.10	c.154A>G	p.Thr52Ala	missense_variant	1	-	-	-	-	-	-	-	-	-	0.158 (19/118)
2	156008430	A	G	6430550D23Rik	ENSMUST00000109617.8	c.-4495T>C		upstream_gene_variant	1	-	-	-	-	-	-	-	-	-	0.158 (19/118)
2	156067487	A	T	Spag4	ENSMUST00000038860.11	c.647A>T	p.Gln216Leu	missense_variant	1	-	-	-	-	-	-	-	-	-	0.135 (8/64)
2	156067487	A	T	Cpne1	ENSMUST00000109607.9	c.*6034T>A		downstream_gene_variant	1	-	-	-	-	-	-	-	-	-	0.135 (8/64)
2	156067487	A	T	Gm28036	ENSMUST00000132494.7	c.*11934T>A		downstream_gene_variant	1	-	-	-	-	-	-	-	-	-	0.135 (8/64)
2	156077644	C	A	Cpne1	ENSMUST00000109607.9	c.904G>T	p.Asp302Tyr	missense_variant	1	-	-	-	-	-	-	-	-	-	0.106 (8/75)
2	156077644	C	A	Gm28036	ENSMUST00000132494.7	c.*958G>T		3_prime_UTR_variant	1	-	-	-	-	-	-	-	-	-	0.106 (8/75)
2	156508875	G	T	Epb41l1	ENSMUST00000125153.8	c.1089G>T	p.Leu363Phe	missense_variant	1	-	-	-	-	-	-	-	-	-	0.111 (11/107)
2	157167247	C	T	Rbl1	ENSMUST00000029170.7	c.2367G>A	p.Leu789Leu	synonymous_variant	1	-	-	-	-	-	-	-	-	-	0.086 (8/96)
2	157167247	C	T	Gm14277	ENSMUST00000121195.1	n.-1573C>T		upstream_gene_variant	1	-	-	-	-	-	-	-	-	-	0.086 (8/96)
2	157252955	G	T	Mroh8	ENSMUST00000143663.1	c.1101+9C>A		intron_variant	1	-	-	-	-	-	-	-	-	-	0.148 (25/157)
2	157467539	A	T	Src	ENSMUST00000092576.10	c.983A>T	p.Glu328Val	missense_variant	1	-	-	-	-	-	-	-	-	-	0.303 (34/109)
2	158272102	G	T	Bpi	ENSMUST00000065039.2	c.919G>T	p.Gly307Trp	missense_variant	1	-	-	-	-	-	-	-	-	-	0.155 (15/110)
2	158276936	T	C	Bpi	ENSMUST00000065039.2	c.1236-22T>C		intron_variant	1	-	-	-	-	-	-	-	-	-	0.118 (15/111)
2	158317620	TG	T	Lbp	ENSMUST00000016168.8	c.652+26delG		intron_variant	1	-	-	-	-	-	-	-	-	-	0.083 (8/106)
2	158325762	T	A	Lbp	ENSMUST00000016168.8	c.1205T>A	p.Leu402Gln	missense_variant	1	-	-	-	-	-	-	-	-	-	0.093 (18/207)
2	158779856	G	A	Fam83d	ENSMUST00000029183.2	c.486G>A	p.Val162Val	synonymous_variant	1	-	-	-	-	-	-	-	-	-	0.137 (31/238)
2	160684427	G	T	Top1	ENSMUST00000109468.2	c.286-21G>T		intron_variant	1	-	-	-	-	-	-	-	-	-	0.131 (13/108)
2	160721518	G	T	Top1	ENSMUST00000109468.2	c.2268G>T	p.Trp756Cys	missense_variant	1	-	-	-	-	-	-	-	-	-	0.142 (21/171)
2	160781060	C	A	Zhx3	ENSMUST00000103111.8	c.1186G>T	p.Gly396Cys	missense_variant	1	-	-	-	-	-	-	-	-	-	0.21 (25/116)
2	160899785	C	G	Lpin3	ENSMUST00000109457.2	c.1474C>G	p.Pro492Ala	missense_variant	1	-	-	-	-	-	-	-	-	-	0.741 (110/146)
2	160981641	C	A	Chd6	ENSMUST00000039782.13	c.3808G>T	p.Glu1270*	stop_gained	1	-	-	-	-	-	-	-	-	-	0.155 (19/133)
2	161019571	T	A	Chd6	ENSMUST00000039782.13	c.1558A>T	p.Ile520Phe	missense_variant	1	-	-	-	-	-	-	-	-	-	0.14 (18/129)
2	161534451	T	C	Ptprt	ENSMUST00000109441.1	c.4014+18A>G		intron_variant	1	-	-	-	-	-	-	-	-	-	0.157 (10/62)
2	161566155	G	T	Ptprt	ENSMUST00000109441.1	c.2836C>A	p.His946Asn	missense_variant	1	-	-	-	-	-	-	-	-	-	0.113 (9/70)
2	162238127	G	T	Ptprt	ENSMUST00000109441.1	c.751C>A	p.Arg251Ser	missense_variant	1	-	-	-	-	-	-	-	-	-	0.113 (8/80)
2	162665771	A	G	Ptprt	ENSMUST00000109441.1	c.-4872T>C		upstream_gene_variant	1	-	-	-	-	-	-	-	-	-	0.152 (8/59)
2	162665771	A	G	9430021M05Rik	ENSMUST00000145985.1	n.265-38A>G		intron_variant	1	-	-	-	-	-	-	-	-	-	0.152 (8/59)
2	162948640	T	A	L3mbtl1	ENSMUST00000035751.11	c.614+12T>A		intron_variant	1	-	-	-	-	-	-	-	-	-	0.096 (10/98)
2	163552640	G	C	Hnf4a	ENSMUST00000018094.12	c.371G>C	p.Gly124Ala	missense_variant	1	-	-	-	-	-	-	-	-	-	0.083 (9/101)
2	164035399	G	T	Pabpc1l	ENSMUST00000067715.4	c.876+17G>T		intron_variant	1	-	-	-	-	-	-	-	-	-	0.233 (8/39)
2	164290130	C	A	Svs3a	ENSMUST00000017147.7	c.620C>A	p.Thr207Lys	missense_variant	1	-	-	-	-	-	-	-	-	-	0.16 (12/75)
2	164332791	T	G	Svs5	ENSMUST00000017148.7	c.6T>G	p.Ser2Arg	missense_variant	1	-	-	-	-	-	-	-	-	-	0.1 (28/260)
2	164500393	G	C	Pigt	ENSMUST00000103101.10	c.607-39G>C		intron_variant	1	-	-	-	-	-	-	-	-	-	0.103 (8/82)
2	164716043	C	A	Spint5	ENSMUST00000103097.9	c.131-3C>A		splice_region_variant&intron_variant	1	-	-	-	-	-	-	-	-	-	0.094 (13/170)
2	164890620	G	T	Pcif1	ENSMUST00000041643.3	c.1726G>T	p.Glu576*	stop_gained	1	-	-	-	-	-	-	-	-	-	0.182 (12/69)
2	164890620	G	T	Zfp335	ENSMUST00000041361.13	c.*1544C>A		downstream_gene_variant	1	-	-	-	-	-	-	-	-	-	0.182 (12/69)
2	164986746	C	T	Slc12a5	ENSMUST00000202623.3	c.1605C>T	p.Ala535Ala	synonymous_variant	1	-	-	-	-	-	-	-	-	-	0.345 (13/36)
2	165116184	G	T	Cdh22	ENSMUST00000065438.12	c.1862C>A	p.Pro621His	missense_variant	1	-	-	-	-	-	-	-	-	-	0.143 (13/79)
2	165146646	A	G	Cdh22	ENSMUST00000065438.12	c.788T>C	p.Val263Ala	missense_variant	1	-	-	-	-	-	-	-	-	-	0.155 (10/72)
2	165839975	C	A	Zmynd8	ENSMUST00000109269.7	c.612+23G>T		intron_variant	1	-	-	-	-	-	-	-	-	-	0.168 (28/149)
2	166572970	C	A	Prex1	ENSMUST00000036719.11	c.4468G>T	p.Glu1490*	stop_gained	1	-	-	-	-	-	-	-	-	-	0.156 (16/112)
2	166647002	T	A	Prex1	ENSMUST00000036719.11	c.248A>T	p.Glu83Val	missense_variant	1	-	-	-	-	-	-	-	-	-	0.169 (18/97)
2	166894712	G	A	Arfgef2	ENSMUST00000099078.9	c.5303G>A	p.Arg1768Gln	missense_variant	1	-	-	-	-	-	-	-	-	-	0.19 (28/140)
2	167060023	C	A	Zfas1	ENSMUST00000145859.2	n.-2912C>A		upstream_gene_variant	1	-	-	-	-	-	-	-	-	-	0.103 (11/139)
2	167060023	C	A	Gm27494	ENSMUST00000184735.1	n.-2993C>A		upstream_gene_variant	1	-	-	-	-	-	-	-	-	-	0.103 (11/139)
2	167060023	C	A	Gm25878	ENSMUST00000104327.1	n.-3450C>A		upstream_gene_variant	1	-	-	-	-	-	-	-	-	-	0.103 (11/139)
2	167060023	C	A	Gm23201	ENSMUST00000104377.1	n.-4975C>A		upstream_gene_variant	1	-	-	-	-	-	-	-	-	-	0.103 (11/139)
2	167060023	C	A	Znfx1	ENSMUST00000048988.13	c.61+9G>T		intron_variant	1	-	-	-	-	-	-	-	-	-	0.103 (11/139)
2	167105547	C	A	Kcnb1	ENSMUST00000059826.9	c.1380G>T	p.Met460Ile	missense_variant	1	-	-	-	-	-	-	-	-	-	0.132 (13/86)
2	167106185	A	C	Kcnb1	ENSMUST00000059826.9	c.742T>G	p.Phe248Val	missense_variant	1	-	-	-	-	-	-	-	-	-	0.167 (11/72)
2	167725347	C	A	A530013C23Rik	ENSMUST00000141923.1	n.170-33C>A		intron_variant	1	-	-	-	-	-	-	-	-	-	0.16 (10/57)
2	168184332	T	A	Adnp	ENSMUST00000057793.10	c.1042A>T	p.Arg348Trp	missense_variant	1	-	-	-	-	-	-	-	-	-	0.107 (21/205)
2	168184332	T	A	Gm20716	ENSMUST00000138667.1	c.*1148A>T		3_prime_UTR_variant	1	-	-	-	-	-	-	-	-	-	0.107 (21/205)
2	168268647	G	A	Kcng1	ENSMUST00000099069.2	c.596C>T	p.Pro199Leu	missense_variant	1	-	-	-	-	-	-	-	-	-	0.261 (14/53)
2	168523251	C	G	Nfatc2	ENSMUST00000074618.9	c.1842G>C	p.Met614Ile	missense_variant	1	-	-	-	-	-	-	-	-	-	0.167 (12/78)
2	169884626	T	G	Tshz2	ENSMUST00000109157.1	c.1141T>G	p.Leu381Val	missense_variant	1	-	-	-	-	-	-	-	-	-	0.127 (12/81)
2	169884626	T	G	Gm26883	ENSMUST00000181446.7	n.3878A>C		non_coding_transcript_exon_variant	1	-	-	-	-	-	-	-	-	-	0.127 (12/81)
2	170601186	C	T	4930470P17Rik	ENSMUST00000062355.1	c.-23G>A		5_prime_UTR_variant	1	-	-	-	-	-	-	-	-	-	0.229 (13/60)
2	172432273	A	T	Cass4	ENSMUST00000109136.2	c.2045A>T	p.Asn682Ile	missense_variant	1	-	-	-	-	-	-	-	-	-	0.117 (8/79)
2	172432273	A	T	Gm14455	ENSMUST00000138288.1	n.185-4508T>A		intron_variant	1	-	-	-	-	-	-	-	-	-	0.117 (8/79)
2	174345933	G	A	Gnas	ENSMUST00000080493.11	c.3188-57G>A		intron_variant	1	-	-	-	-	-	-	-	-	-	0.182 (8/47)
2	174345933	G	A	Gm20721	ENSMUST00000168292.1	c.191+57C>T		intron_variant	1	-	-	-	-	-	-	-	-	-	0.182 (8/47)
2	177315899	T	G	Gm14412	ENSMUST00000108959.2	c.202A>C	p.Ser68Arg	missense_variant	1	-	-	-	-	-	-	-	-	-	0.061 (64/1034)
2	178364881	A	G	Sycp2	ENSMUST00000081134.9	c.2504T>C	p.Leu835Pro	missense_variant	1	-	-	-	-	-	-	-	-	-	0.111 (38/293)
2	178403742	T	G	Sycp2	ENSMUST00000081134.9	c.84A>C	p.Ala28Ala	synonymous_variant	1	-	-	-	-	-	-	-	-	-	0.144 (18/135)
2	178481667	G	C	Cdh26	ENSMUST00000042092.8	c.2058G>C	p.Leu686Leu	synonymous_variant	1	-	-	-	-	-	-	-	-	-	0.118 (10/96)
2	179416711	A	C	4930591A17Rik	ENSMUST00000041998.1	n.566A>C		non_coding_transcript_exon_variant	1	-	-	-	-	-	-	-	-	-	0.103 (11/90)
2	179924615	C	A	Taf4	ENSMUST00000041618.12	c.2358-29G>T		intron_variant	1	-	-	-	-	-	-	-	-	-	0.13 (18/128)
2	179924617	T	A	Taf4	ENSMUST00000041618.12	c.2358-31A>T		intron_variant	1	-	-	-	-	-	-	-	-	-	0.128 (18/124)
2	180179659	C	A	Lama5	ENSMUST00000015791.5	c.9186G>T	p.Glu3062Asp	missense_variant	1	-	-	-	-	-	-	-	-	-	0.196 (10/54)
2	180179659	C	A	Adrm1	ENSMUST00000061437.4	c.*3479C>A		downstream_gene_variant	1	-	-	-	-	-	-	-	-	-	0.196 (10/54)
2	180179659	C	A	Mir7005	ENSMUST00000185089.1	n.*96G>T		downstream_gene_variant	1	-	-	-	-	-	-	-	-	-	0.196 (10/54)
2	180188433	C	A	Lama5	ENSMUST00000015791.5	c.5647-41G>T		intron_variant	1	-	-	-	-	-	-	-	-	-	0.188 (8/38)
2	180281242	G	T	Rbbp8nl	ENSMUST00000038529.1	c.557C>A	p.Pro186Gln	missense_variant	1	-	-	-	-	-	-	-	-	-	0.125 (13/109)
2	180640467	GA	G	Tcfl5	ENSMUST00000037877.10	c.799-5delT		splice_region_variant&intron_variant	1	-	-	-	-	-	-	-	-	-	0.379 (12/34)
2	180670354	C	A	Dido1	ENSMUST00000087517.9	c.3241G>T	p.Asp1081Tyr	missense_variant&splice_region_variant	1	-	-	-	-	-	-	-	-	-	0.195 (17/87)
2	180738471	AT	A	Slc17a9	ENSMUST00000094218.3	c.978+37delT		intron_variant	1	-	-	-	-	-	-	-	-	-	0.171 (16/93)
2	180935331	C	G	Birc7	ENSMUST00000108875.1	c.*2001C>G		downstream_gene_variant	1	-	-	-	-	-	-	-	-	-	0.124 (14/127)
2	180935331	C	G	Nkain4	ENSMUST00000103053.9	c.618-302G>C		intron_variant	1	-	-	-	-	-	-	-	-	-	0.124 (14/127)
2	181148030	G	C	Eef1a2	ENSMUST00000055990.7	c.1341C>G	p.Gly447Gly	synonymous_variant	1	-	-	-	-	-	-	-	-	-	0.186 (10/50)
2	181233902	C	G	Helz2	ENSMUST00000094203.10	c.4798G>C	p.Glu1600Gln	missense_variant	1	-	-	-	-	-	-	-	-	-	0.143 (9/60)
2	181237564	G	C	Helz2	ENSMUST00000094203.10	c.2260C>G	p.Pro754Ala	missense_variant	1	-	-	-	-	-	-	-	-	-	0.35 (8/22)
2	181255841	C	A	Gmeb2	ENSMUST00000049032.12	c.691+31G>T		intron_variant	1	-	-	-	-	-	-	-	-	-	0.145 (14/91)
2	181423588	T	A	Zbtb46	ENSMUST00000029106.12	c.768A>T	p.Ser256Ser	synonymous_variant	1	-	-	-	-	-	-	-	-	-	0.141 (10/83)
2	181423588	T	A	Gm22708	ENSMUST00000158987.1	n.*2347A>T		downstream_gene_variant	1	-	-	-	-	-	-	-	-	-	0.141 (10/83)
4	4063308	A	C	Sdr16c6	ENSMUST00000095151.11	c.466T>G	p.Phe156Val	missense_variant	1	-	-	-	-	-	-	-	-	-	0.29 (25/85)
4	5798991	C	A	Fam110b	ENSMUST00000054857.12	c.408C>A	p.Gly136Gly	synonymous_variant	1	-	-	-	-	-	-	-	-	-	0.615 (9/14)
4	6271295	C	A	Cyp7a1	ENSMUST00000029905.1	c.909-49G>T		intron_variant	1	-	-	-	-	-	-	-	-	-	0.647 (13/21)
4	8844313	C	G	Chd7	ENSMUST00000039267.9	c.4505C>G	p.Ala1502Gly	missense_variant&splice_region_variant	1	-	-	-	-	-	-	-	-	-	0.529 (57/110)
4	9430002	C	A	Gm11817	ENSMUST00000155578.1	n.*1959G>T		downstream_gene_variant	1	-	-	-	-	-	-	-	-	-	0.767 (29/38)
4	9430002	C	A	Clvs1	ENSMUST00000038841.13	c.977+27C>A		intron_variant	1	-	-	-	-	-	-	-	-	-	0.767 (29/38)
4	11384396	C	T	Esrp1	ENSMUST00000108311.8	c.328G>A	p.Gly110Arg	missense_variant	1	-	-	-	-	-	-	-	-	-	0.345 (38/109)
4	11385765	A	T	Esrp1	ENSMUST00000108311.8	c.143T>A	p.Leu48Gln	missense_variant	1	-	-	-	-	-	-	-	-	-	0.592 (37/62)
4	16151943	C	A	Ripk2	ENSMUST00000037035.11	c.615G>T	p.Arg205Ser	missense_variant	1	-	-	-	-	-	-	-	-	-	0.585 (88/147)
4	18887762	A	AC	Gm11867	ENSMUST00000133363.1	n.1154-3325_1154-3324insC		intron_variant	1	-	-	-	-	-	-	-	-	-	0.32 (17/58)
4	18887762	A	AC	Cnbd1	ENSMUST00000137780.1	c.766-16_766-15insG		intron_variant	1	-	-	-	-	-	-	-	-	-	0.32 (17/58)
4	19818987	C	G	Slc7a13	ENSMUST00000035890.7	c.186C>G	p.Thr62Thr	synonymous_variant	1	-	-	-	-	-	-	-	-	-	0.73 (33/45)
4	21796847	G	T	Usp45	ENSMUST00000065111.14	c.540G>T	p.Lys180Asn	missense_variant	1	-	-	-	-	-	-	-	-	-	0.654 (42/64)
4	21899102	C	A	Coq3	ENSMUST00000029909.2	c.434C>A	p.Pro145His	missense_variant	1	-	-	-	-	-	-	-	-	-	0.702 (94/133)
4	22427280	T	C	Fbxl4	ENSMUST00000039234.9	c.1520T>C	p.Leu507Pro	missense_variant	1	-	-	-	-	-	-	-	-	-	0.386 (24/62)
4	24632584	C	A	Klhl32	ENSMUST00000108218.9	c.1413+59G>T		intron_variant	1	-	-	-	-	-	-	-	-	-	0.615 (30/46)
4	26369630	A	T	Bhmt-ps1	ENSMUST00000178743.1	n.578T>A		non_coding_transcript_exon_variant	1	-	-	-	-	-	-	-	-	-	0.538 (34/64)
4	26369930	T	A	Bhmt-ps1	ENSMUST00000178743.1	n.278A>T		non_coding_transcript_exon_variant	1	-	-	-	-	-	-	-	-	-	0.297 (36/123)
4	32580041	C	A	Bach2	ENSMUST00000108180.8	c.2265C>A	p.Pro755Pro	synonymous_variant	1	-	-	-	-	-	-	-	-	-	0.526 (11/23)
4	32602368	A	G	Gja10	ENSMUST00000056517.2	c.15T>C	p.Asn5Asn	synonymous_variant	1	-	-	-	-	-	-	-	-	-	0.25 (9/41)
4	32667102	A	G	Mdn1	ENSMUST00000071642.10	c.566A>G	p.Asn189Ser	missense_variant	1	-	-	-	-	-	-	-	-	-	0.348 (36/106)
4	32668944	G	T	Mdn1	ENSMUST00000071642.10	c.1001G>T	p.Gly334Val	missense_variant	1	-	-	-	-	-	-	-	-	-	0.64 (67/104)
4	32696244	A	C	Mdn1	ENSMUST00000071642.10	c.3626A>C	p.Asn1209Thr	missense_variant	1	-	-	-	-	-	-	-	-	-	0.262 (22/81)
4	32806229	C	T	Ankrd6	ENSMUST00000035719.10	c.2023G>A	p.Glu675Lys	missense_variant	1	-	-	-	-	-	-	-	-	-	0.585 (37/67)
4	32806229	C	T	Lyrm2	ENSMUST00000062802.4	c.*5006C>T		downstream_gene_variant	1	-	-	-	-	-	-	-	-	-	0.585 (37/67)
4	32824486	G	C	Ankrd6	ENSMUST00000035719.10	c.426C>G	p.Asn142Lys	missense_variant	1	-	-	-	-	-	-	-	-	-	0.611 (13/21)
4	34719661	G	C	Cfap206	ENSMUST00000029971.11	c.752C>G	p.Pro251Arg	missense_variant	1	-	-	-	-	-	-	-	-	-	0.556 (43/78)
4	41293902	C	G	Dcaf12	ENSMUST00000030145.8	c.1203+31G>C		intron_variant	1	-	-	-	-	-	-	-	-	-	0.808 (25/30)
4	41614323	G	T	Dnaic1	ENSMUST00000102963.9	c.998G>T	p.Arg333Leu	missense_variant	1	-	-	-	-	-	-	-	-	-	0.6 (18/33)
4	41739546	C	A	Sigmar1	ENSMUST00000059354.14	c.480G>T	p.Thr160Thr	synonymous_variant	1	-	-	-	-	-	-	-	-	-	0.56 (17/31)
4	41739546	C	A	Il11ra1	ENSMUSG00000073889	n.41739546C>A		intragenic_variant	1	-	-	-	-	-	-	-	-	-	0.56 (17/31)
4	43005160	G	A	Vcp	ENSMUST00000030164.7	c.-4982C>T		upstream_gene_variant	1	-	-	-	-	-	-	-	-	-	0.435 (11/26)
4	43005160	G	A	Fancg	ENSMUST00000030165.4	c.1158+51C>T		intron_variant	1	-	-	-	-	-	-	-	-	-	0.435 (11/26)
4	43161439	T	A	Unc13b	ENSMUST00000207569.1	c.527-4305T>A		intron_variant	1	-	-	-	-	-	-	-	-	-	0.64 (42/63)
4	43261043	G	A	Unc13b	ENSMUST00000207569.1	c.12635-639G>A		intron_variant	1	-	-	-	-	-	-	-	-	-	0.45 (24/51)
4	43361903	A	T	Atp8b5	ENSMUST00000107942.8	c.1948A>T	p.Arg650Trp	missense_variant	1	-	-	-	-	-	-	-	-	-	0.5 (40/86)
4	43427171	G	T	Fam166b	ENSMUST00000052829.9	c.*12C>A		3_prime_UTR_variant	1	-	-	-	-	-	-	-	-	-	0.314 (15/46)
4	43427171	G	T	Rusc2	ENSMUST00000035645.11	c.*522G>T		downstream_gene_variant	1	-	-	-	-	-	-	-	-	-	0.314 (15/46)
4	43427172	A	G	Fam166b	ENSMUST00000052829.9	c.*11T>C		3_prime_UTR_variant	1	-	-	-	-	-	-	-	-	-	0.306 (15/45)
4	43427172	A	G	Rusc2	ENSMUST00000035645.11	c.*523A>G		downstream_gene_variant	1	-	-	-	-	-	-	-	-	-	0.306 (15/45)
4	43445822	A	T	Tesk1	ENSMUST00000060864.12	c.870+4A>T		splice_region_variant&intron_variant	1	-	-	-	-	-	-	-	-	-	0.702 (40/57)
4	43445822	A	T	Cd72	ENSMUST00000030179.10	c.*2443T>A		downstream_gene_variant	1	-	-	-	-	-	-	-	-	-	0.702 (40/57)
4	43493084	T	G	Ccdc107	ENSMUST00000107922.2	c.-347T>G		upstream_gene_variant&intragenic_variant	1	-	-	-	-	-	-	-	-	-	0.333 (29/93)
4	43493084	T	G	Rmrp	ENSMUST00000157463.1	n.-26A>C		upstream_gene_variant	1	-	-	-	-	-	-	-	-	-	0.333 (29/93)
4	43493084	T	G	Arhgef39	ENSMUST00000054538.12	c.*3594A>C		downstream_gene_variant	1	-	-	-	-	-	-	-	-	-	0.333 (29/93)
4	43543211	C	A	Tln1	ENSMUST00000030187.13	c.3952G>T	p.Ala1318Ser	missense_variant	1	-	-	-	-	-	-	-	-	-	0.759 (25/34)
4	43650720	A	T	Npr2	ENSMUST00000030191.14	c.2999A>T	p.His1000Leu	missense_variant	1	-	-	-	-	-	-	-	-	-	0.633 (46/74)
4	43650720	A	T	Spag8	ENSMUST00000084646.10	c.*740T>A		downstream_gene_variant	1	-	-	-	-	-	-	-	-	-	0.633 (46/74)
4	43650720	A	T	Hint2	ENSMUST00000030192.4	c.*3600T>A		downstream_gene_variant	1	-	-	-	-	-	-	-	-	-	0.633 (46/74)
4	43664208	G	T	Fam221b	ENSMUST00000056474.6	c.997+1252C>A		intron_variant	1	-	-	-	-	-	-	-	-	-	0.529 (9/17)
4	43664208	G	T	Gm12481	ENSMUST00000102482.4	n.166G>T		non_coding_transcript_exon_variant	1	-	-	-	-	-	-	-	-	-	0.529 (9/17)
4	43689710	C	T	Tmem8b	ENSMUST00000107866.7	c.2249C>T	p.Ala750Val	missense_variant	1	-	-	-	-	-	-	-	-	-	0.333 (8/25)
4	43689710	C	T	Gm23257	ENSMUST00000158322.1	n.-2976C>T		upstream_gene_variant	1	-	-	-	-	-	-	-	-	-	0.333 (8/25)
4	43705637	G	T	Olfr71	ENSMUST00000055401.1	c.930C>A	p.Ala310Ala	synonymous_variant	1	-	-	-	-	-	-	-	-	-	0.636 (23/37)
4	43705637	G	T	Olfr70	ENSMUST00000055545.3	c.-8466C>A		upstream_gene_variant	1	-	-	-	-	-	-	-	-	-	0.636 (23/37)
4	43770267	A	C	Olfr159	ENSMUST00000053931.1	c.743T>G	p.Val248Gly	missense_variant	1	-	-	-	-	-	-	-	-	-	0.65 (71/110)
4	43770267	A	C	Olfr269-ps1	ENSMUST00000120783.1	n.-2490T>G		upstream_gene_variant	1	-	-	-	-	-	-	-	-	-	0.65 (71/110)
4	43820619	C	G	Olfr156	ENSMUST00000079465.3	c.741G>C	p.Val247Val	synonymous_variant	1	-	-	-	-	-	-	-	-	-	0.595 (82/138)
4	43855096	G	A	Olfr155	ENSMUST00000095108.1	c.786G>A	p.Lys262Lys	synonymous_variant	1	-	-	-	-	-	-	-	-	-	0.064 (8/126)
4	43985018	A	T	Ccin	ENSMUST00000095107.2	c.1424A>T	p.Gln475Leu	missense_variant	1	-	-	-	-	-	-	-	-	-	0.861 (36/43)
4	44697678	C	A	Pax5	ENSMUST00000014174.13	c.56G>T	p.Gly19Val	missense_variant	1	-	-	-	-	-	-	-	-	-	0.643 (24/36)
4	44994595	G	A	Zbtb5	ENSMUST00000055028.8	c.788C>T	p.Pro263Leu	missense_variant	1	-	-	-	-	-	-	-	-	-	0.257 (27/95)
4	44994595	G	A	Grhpr	ENSMUST00000045078.12	c.*4097G>A		downstream_gene_variant	1	-	-	-	-	-	-	-	-	-	0.257 (27/95)
4	44994596	G	A	Zbtb5	ENSMUST00000055028.8	c.787C>T	p.Pro263Ser	missense_variant	1	-	-	-	-	-	-	-	-	-	0.253 (27/92)
4	44994596	G	A	Grhpr	ENSMUST00000045078.12	c.*4098G>A		downstream_gene_variant	1	-	-	-	-	-	-	-	-	-	0.253 (27/92)
4	45906073	C	T	Ccdc180	ENSMUST00000178561.7	c.1278C>T	p.Cys426Cys	synonymous_variant	1	-	-	-	-	-	-	-	-	-	0.732 (49/66)
4	45916406	A	C	Ccdc180	ENSMUST00000178561.7	c.2606A>C	p.Lys869Thr	missense_variant	1	-	-	-	-	-	-	-	-	-	0.39 (21/50)
4	45920910	A	C	Ccdc180	ENSMUST00000178561.7	c.2855A>C	p.Lys952Thr	missense_variant	1	-	-	-	-	-	-	-	-	-	0.407 (12/32)
4	46092271	T	C	Tmod1	ENSMUST00000107773.2	c.618+2T>C		splice_donor_variant&intron_variant	1	-	-	-	-	-	-	-	-	-	0.643 (21/32)
4	46510418	T	A	Trim14	ENSMUST00000046897.12	c.787+19A>T		intron_variant	1	-	-	-	-	-	-	-	-	-	0.625 (16/26)
4	46542225	C	A	Gm16731	ENSMUST00000132432.1	n.*2423C>A		downstream_gene_variant	1	-	-	-	-	-	-	-	-	-	0.634 (32/51)
4	46542225	C	A	Coro2a	ENSMUST00000107757.7	c.1137+10G>T		intron_variant	1	-	-	-	-	-	-	-	-	-	0.634 (32/51)
4	47296075	C	T	Col15a1	ENSMUST00000102917.10	c.2860-3C>T		splice_region_variant&intron_variant	1	-	-	-	-	-	-	-	-	-	0.311 (23/82)
4	49702884	C	A	Grin3a	ENSMUST00000093859.10	c.2615-14G>T		intron_variant	1	-	-	-	-	-	-	-	-	-	0.673 (45/64)
4	49770622	A	G	Grin3a	ENSMUST00000093859.10	c.2149T>C	p.Ser717Pro	missense_variant	1	-	-	-	-	-	-	-	-	-	0.31 (16/51)
4	52442255	G	A	Smc2	ENSMUST00000102915.9	c.171G>A	p.Val57Val	splice_region_variant&synonymous_variant	1	-	-	-	-	-	-	-	-	-	0.575 (29/52)
4	52442255	G	A	Smc2os	ENSMUST00000141473.1	n.-3290C>T		upstream_gene_variant	1	-	-	-	-	-	-	-	-	-	0.575 (29/52)
4	52442255	G	A	Tmc4-ps	ENSMUST00000117819.1	n.*1660C>T		downstream_gene_variant	1	-	-	-	-	-	-	-	-	-	0.575 (29/52)
4	52997216	G	T	Nipsnap3a	ENSMUST00000107666.1	c.487G>T	p.Glu163*	stop_gained	1	-	-	-	-	-	-	-	-	-	0.631 (63/100)
4	53262394	G	T	AI427809	ENSMUST00000123127.2	n.995C>A		non_coding_transcript_exon_variant	1	-	-	-	-	-	-	-	-	-	0.744 (35/47)
4	53517617	A	T	Slc44a1	ENSMUST00000107647.7	c.339A>T	p.Val113Val	synonymous_variant	1	-	-	-	-	-	-	-	-	-	0.625 (51/81)
4	53553504	G	C	Slc44a1	ENSMUST00000107647.7	c.1510G>C	p.Ala504Pro	missense_variant	1	-	-	-	-	-	-	-	-	-	0.327 (18/70)
4	55050445	C	A	Zfp462	ENSMUST00000098070.9	c.6654C>A	p.Thr2218Thr	synonymous_variant	1	-	-	-	-	-	-	-	-	-	0.731 (28/35)
4	56790146	T	A	Ikbkap	ENSMUST00000030140.2	c.943A>T	p.Thr315Ser	missense_variant	1	-	-	-	-	-	-	-	-	-	0.692 (74/107)
4	58111386	G	A	Svep1	ENSMUST00000042850.8	c.3232C>T	p.Pro1078Ser	missense_variant	1	-	-	-	-	-	-	-	-	-	0.653 (38/58)
4	58111485	G	T	Svep1	ENSMUST00000042850.8	c.3158-25C>A		intron_variant	1	-	-	-	-	-	-	-	-	-	0.567 (18/34)
4	58115814	G	T	Svep1	ENSMUST00000042850.8	c.2878C>A	p.Pro960Thr	missense_variant	1	-	-	-	-	-	-	-	-	-	0.566 (33/59)
4	58133415	C	A	Svep1	ENSMUST00000042850.8	c.1689G>T	p.Glu563Asp	missense_variant	1	-	-	-	-	-	-	-	-	-	0.653 (37/59)
4	58957052	G	T	Zkscan16	ENSMUST00000107554.1	c.1333G>T	p.Gly445Cys	missense_variant	1	-	-	-	-	-	-	-	-	-	0.633 (19/32)
4	59524889	C	T	Ptbp3	ENSMUST00000174586.7	c.43-413G>A		intron_variant	1	-	-	-	-	-	-	-	-	-	0.276 (9/33)
4	59617706	A	T	Hsdl2	ENSMUST00000030078.11	c.1432A>T	p.Lys478*	stop_gained	1	-	-	-	-	-	-	-	-	-	0.317 (53/152)
4	59720313	G	T	E130308A19Rik	ENSMUST00000052420.6	c.1844G>T	p.Cys615Phe	missense_variant	1	-	-	-	-	-	-	-	-	-	0.646 (37/57)
4	59911799	T	A	Slc46a2	ENSMUST00000030081.1	c.1373+39A>T		intron_variant	1	-	-	-	-	-	-	-	-	-	0.741 (23/31)
4	60222378	T	C	Mup8	ENSMUST00000163931.7	c.92A>G	p.Glu31Gly	missense_variant	1	-	-	-	-	-	-	-	-	-	0.236 (43/190)
4	60660215	C	A	Mup11	ENSMUST00000098046.9	c.363G>T	p.Met121Ile	missense_variant	1	-	-	-	-	-	-	-	-	-	0.647 (66/103)
4	61798902	G	C	Gm13775	ENSMUST00000153865.1	n.354+803G>C		intron_variant	1	-	-	-	-	-	-	-	-	-	0.147 (33/221)
4	61798902	G	C	Mup-ps16	ENSMUST00000120085.1	n.320G>C		non_coding_transcript_exon_variant	1	-	-	-	-	-	-	-	-	-	0.147 (33/221)
4	61800033	A	C	Gm13775	ENSMUST00000153865.1	n.442A>C		non_coding_transcript_exon_variant	1	-	-	-	-	-	-	-	-	-	0.131 (49/384)
4	61800033	A	C	Mup-ps16	ENSMUST00000120085.1	n.556A>C		non_coding_transcript_exon_variant	1	-	-	-	-	-	-	-	-	-	0.131 (49/384)
4	62337093	C	G	Fkbp15	ENSMUST00000084527.9	c.678G>C	p.Pro226Pro	synonymous_variant	1	-	-	-	-	-	-	-	-	-	0.722 (34/47)
4	63095497	G	C	Zfp618	ENSMUST00000107415.7	c.694G>C	p.Val232Leu	missense_variant	1	-	-	-	-	-	-	-	-	-	0.722 (14/21)
4	63132763	G	T	Zfp618	ENSMUST00000107415.7	c.1780G>T	p.Val594Leu	missense_variant	1	-	-	-	-	-	-	-	-	-	0.617 (44/74)
4	63171997	T	G	Kif12	ENSMUST00000030042.2	c.9A>C	p.Glu3Asp	missense_variant	1	-	-	-	-	-	-	-	-	-	0.317 (31/101)
4	63324818	A	G	Col27a1	ENSMUST00000036300.12	c.4764+29A>G		intron_variant	1	-	-	-	-	-	-	-	-	-	0.333 (15/46)
4	63346060	G	T	Orm1	ENSMUST00000030044.2	c.352G>T	p.Ala118Ser	missense_variant	1	-	-	-	-	-	-	-	-	-	0.052 (8/151)
4	63346060	G	T	Gm11212	ENSMUST00000118337.1	n.-4351G>T		upstream_gene_variant	1	-	-	-	-	-	-	-	-	-	0.052 (8/151)
4	66266400	G	C	Astn2	ENSMUST00000068214.10	c.479-20C>G		intron_variant	1	-	-	-	-	-	-	-	-	-	0.667 (10/16)
4	68798751	C	A	Brinp1	ENSMUST00000030036.5	c.859G>T	p.Glu287*	stop_gained	1	-	-	-	-	-	-	-	-	-	0.774 (29/39)
4	70354906	C	A	Cdk5rap2	ENSMUST00000144099.7	c.660-31G>T		intron_variant	1	-	-	-	-	-	-	-	-	-	0.867 (15/17)
4	72852004	C	A	Aldoart1	ENSMUST00000078617.4	c.566G>T	p.Arg189Leu	missense_variant	1	-	-	-	-	-	-	-	-	-	0.734 (82/109)
4	76133214	C	A	Ptprd	ENSMUST00000107289.8	c.810G>T	p.Met270Ile	missense_variant	1	-	-	-	-	-	-	-	-	-	1.0 (74/75)
4	80835226	G	T	Tyrp1	ENSMUST00000006151.12	c.153G>T	p.Pro51Pro	synonymous_variant	1	-	-	-	-	-	-	-	-	-	0.404 (20/51)
4	80844801	T	A	Tyrp1	ENSMUST00000006151.12	c.924T>A	p.Gly308Gly	synonymous_variant	1	-	-	-	-	-	-	-	-	-	0.611 (14/22)
4	80844889	G	T	Tyrp1	ENSMUST00000006151.12	c.1012G>T	p.Glu338*	stop_gained	1	-	-	-	-	-	-	-	-	-	0.5 (21/40)
4	81348627	T	A	Mpdz	ENSMUST00000107262.7	c.3019+3A>T		splice_region_variant&intron_variant	1	-	-	-	-	-	-	-	-	-	0.528 (21/42)
4	82999983	C	A	Frem1	ENSMUST00000071708.11	c.1721G>T	p.Gly574Val	missense_variant	1	-	-	-	-	-	-	-	-	-	0.364 (33/90)
4	83227140	C	A	Ttc39b	ENSMUST00000102823.9	c.1848G>T	p.Thr616Thr	synonymous_variant	1	-	-	-	-	-	-	-	-	-	0.565 (35/60)
4	83459874	G	A	Psip1	ENSMUST00000030207.14	c.1384C>T	p.Pro462Ser	missense_variant	1	-	-	-	-	-	-	-	-	-	0.423 (51/112)
4	83459874	G	A	Snapc3	ENSMUSG00000028483	n.83459874G>A		intragenic_variant	1	-	-	-	-	-	-	-	-	-	0.423 (51/112)
4	83795230	G	A	Ccdc171	ENSMUST00000053414.12	c.3505G>A	p.Ala1169Thr	missense_variant	1	-	-	-	-	-	-	-	-	-	0.362 (21/62)
4	86341053	T	G	Adamtsl1	ENSMUST00000107178.8	c.2347-12T>G		intron_variant	1	-	-	-	-	-	-	-	-	-	0.308 (12/33)
4	86445803	AG	A	Saxo1	ENSMUST00000030216.5	c.441delC	p.Trp148fs	frameshift_variant	1	-	-	-	-	-	-	-	-	-	0.4 (24/55)
4	86445803	AG	A	Gm12550	ENSMUST00000118478.1	n.-3463delC		upstream_gene_variant	1	-	-	-	-	-	-	-	-	-	0.4 (24/55)
4	87227471	C	T	Slc24a2	ENSMUST00000107158.8	c.345G>A	p.Glu115Glu	synonymous_variant	1	-	-	-	-	-	-	-	-	-	0.225 (21/99)
4	88229324	T	A	Focad	ENSMUST00000097992.9	c.1457T>A	p.Val486Glu	missense_variant&splice_region_variant	1	-	-	-	-	-	-	-	-	-	0.104 (25/213)
4	88676452	G	T	Ifna16	ENSMUST00000105148.1	c.405C>A	p.Thr135Thr	synonymous_variant	1	-	-	-	-	-	-	-	-	-	0.541 (135/251)
4	88690718	T	G	Ifnab	ENSMUST00000071378.5	c.510A>C	p.Glu170Asp	missense_variant	1	-	-	-	-	-	-	-	-	-	0.265 (107/388)
4	88816737	A	G	Ifna7	ENSMUST00000105143.2	c.510A>G	p.Glu170Glu	synonymous_variant	1	-	-	-	-	-	-	-	-	-	0.249 (97/395)
4	88816737	A	G	Ifna11	ENSMUST00000170428.2	c.-3222A>G		upstream_gene_variant	1	-	-	-	-	-	-	-	-	-	0.249 (97/395)
4	88835999	C	T	Ifna5	ENSMUST00000102804.1	c.475C>T	p.His159Tyr	missense_variant	1	-	-	-	-	-	-	-	-	-	0.503 (191/383)
4	90224653	A	G	Zfp352	ENSMUST00000080541.4	c.1029A>G	p.Arg343Arg	synonymous_variant	1	-	-	-	-	-	-	-	-	-	0.283 (32/115)
4	90225381	CA	C	Zfp352	ENSMUST00000080541.4	c.*102delA		downstream_gene_variant&intragenic_variant	1	-	-	-	-	-	-	-	-	-	0.216 (18/87)
4	94665232	G	T	Ift74	ENSMUST00000030311.10	c.1054+2566G>T		intron_variant	1	-	-	-	-	-	-	-	-	-	0.358 (58/165)
4	94665232	G	T	Mir872	ENSMUST00000104728.1	n.76G>T		non_coding_transcript_exon_variant	1	-	-	-	-	-	-	-	-	-	0.358 (58/165)
4	95051378	T	A	Jun	ENSMUST00000107094.1	c.-107A>T		5_prime_UTR_premature_start_codon_gain_variant&5_prime_UTR_variant	1	-	-	-	-	-	-	-	-	-	0.372 (19/46)
4	95051378	T	A	Gm12703	ENSMUST00000145411.1	n.-3008A>T		upstream_gene_variant	1	-	-	-	-	-	-	-	-	-	0.372 (19/46)
4	96307303	T	G	Cyp2j11	ENSMUST00000015368.7	c.1155A>C	p.Glu385Asp	missense_variant	1	-	-	-	-	-	-	-	-	-	0.237 (51/212)
4	96307436	G	T	Cyp2j11	ENSMUST00000015368.7	c.1022C>A	p.Ser341Tyr	missense_variant	1	-	-	-	-	-	-	-	-	-	0.32 (49/160)
4	96536068	C	A	Cyp2j6	ENSMUST00000030303.5	c.451G>T	p.Gly151*	stop_gained	1	-	-	-	-	-	-	-	-	-	0.554 (75/141)
4	96629506	G	T	Cyp2j5	ENSMUST00000030299.7	c.1468C>A	p.Pro490Thr	missense_variant	1	-	-	-	-	-	-	-	-	-	0.326 (37/114)
4	96769648	GT	G	Gm12695	ENSMUST00000107071.1	c.282delA	p.Lys94fs	frameshift_variant	1	-	-	-	-	-	-	-	-	-	0.196 (25/128)
4	97569200	G	T	E130114P18Rik	ENSMUST00000146447.7	c.452C>A	p.Pro151Gln	missense_variant	1	-	-	-	-	-	-	-	-	-	0.443 (88/200)
4	98611130	C	T	Inadl	ENSMUST00000041284.9	c.4040C>T	p.Ser1347Leu	missense_variant	1	-	-	-	-	-	-	-	-	-	0.408 (59/140)
4	98676318	A	T	Inadl	ENSMUST00000041284.9	c.4906A>T	p.Lys1636*	stop_gained&splice_region_variant	1	-	-	-	-	-	-	-	-	-	0.404 (22/54)
4	98780053	G	T	Kank4	ENSMUST00000102790.3	c.156C>A	p.Ile52Ile	synonymous_variant	1	-	-	-	-	-	-	-	-	-	0.569 (43/77)
4	98945225	C	A	Dock7	ENSMUST00000127417.2	c.5834G>T	p.Gly1945Val	missense_variant	1	-	-	-	-	-	-	-	-	-	0.358 (51/149)
4	99031403	C	A	Angptl3	ENSMUST00000030280.6	c.399C>A	p.Ala133Ala	synonymous_variant	1	-	-	-	-	-	-	-	-	-	0.385 (35/95)
4	99031403	C	A	Dock7	ENSMUST00000127417.2	c.1683-7944G>T		intron_variant	1	-	-	-	-	-	-	-	-	-	0.385 (35/95)
4	99657066	C	A	Foxd3	ENSMUST00000087285.4	c.442C>A	p.Pro148Thr	missense_variant	1	-	-	-	-	-	-	-	-	-	0.441 (36/83)
4	99657066	C	A	Gm12688	ENSMUST00000136525.1	n.-2083G>T		upstream_gene_variant	1	-	-	-	-	-	-	-	-	-	0.441 (36/83)
4	99657066	C	A	Gm23366	ENSMUST00000175022.1	n.-676C>A		upstream_gene_variant	1	-	-	-	-	-	-	-	-	-	0.441 (36/83)
4	99978997	C	T	Pgm2	ENSMUST00000102783.4	c.1331C>T	p.Thr444Ile	missense_variant	1	-	-	-	-	-	-	-	-	-	0.429 (20/42)
4	100482840	T	A	Ube2u	ENSMUST00000133493.8	c.207T>A	p.Asn69Lys	missense_variant	1	-	-	-	-	-	-	-	-	-	0.403 (34/88)
4	101745614	C	A	Lepr	ENSMUST00000037552.9	c.598C>A	p.Pro200Thr	missense_variant	1	-	-	-	-	-	-	-	-	-	0.445 (56/128)
4	101910012	C	A	Gm12800	ENSMUST00000075999.3	c.457C>A	p.Leu153Met	missense_variant	1	-	-	-	-	-	-	-	-	-	0.242 (41/177)
4	101940723	G	T	Gm12794	ENSMUST00000052027.7	c.287+30G>T		intron_variant	1	-	-	-	-	-	-	-	-	-	0.39 (68/178)
4	103072771	T	G	Wdr78	ENSMUST00000106868.3	c.1022A>C	p.Asn341Thr	missense_variant	1	-	-	-	-	-	-	-	-	-	0.368 (36/97)
4	103557021	G	T	Gm12720-Gm12715	ENSMUSG00000087482-ENSMUSG00000059195	n.103557021G>T		intergenic_region	1	-	-	-	-	-	-	-	-	-	0.384 (47/120)
4	104728078	G	C	Dab1	ENSMUST00000106830.8	c.1414G>C	p.Val472Leu	missense_variant	1	-	-	-	-	-	-	-	-	-	0.455 (36/85)
4	104791944	T	G	C8b	ENSMUST00000031663.9	c.1231+21T>G		intron_variant	1	-	-	-	-	-	-	-	-	-	0.077 (9/109)
4	104862686	C	A	C8a	ENSMUST00000064873.8	c.226G>T	p.Gly76Cys	missense_variant	1	-	-	-	-	-	-	-	-	-	0.518 (51/97)
4	104862686	C	A	Gm17662	ENSMUST00000179793.1	c.*3549C>A		downstream_gene_variant	1	-	-	-	-	-	-	-	-	-	0.518 (51/97)
4	104913660	G	C	1700024P16Rik	ENSMUST00000106803.8	c.171G>C	p.Gln57His	missense_variant	1	-	-	-	-	-	-	-	-	-	0.438 (8/23)
4	104945475	G	A	1700024P16Rik	ENSMUST00000106803.8	c.573G>A	p.Glu191Glu	synonymous_variant	1	-	-	-	-	-	-	-	-	-	0.349 (18/51)
4	104999277	T	C	1700024P16Rik	ENSMUST00000106803.8	c.1730-49T>C		intron_variant	1	-	-	-	-	-	-	-	-	-	0.208 (17/77)
4	106458941	G	T	Pcsk9	ENSMUST00000049507.5	c.304C>A	p.Gln102Lys	missense_variant	1	-	-	-	-	-	-	-	-	-	0.632 (12/21)
4	106463643	C	T	Pcsk9	ENSMUST00000049507.5	c.216+52G>A		intron_variant	1	-	-	-	-	-	-	-	-	-	0.614 (32/53)
4	106607300	G	T	Lexm	ENSMUST00000067387.8	c.1161C>A	p.Asp387Glu	missense_variant	1	-	-	-	-	-	-	-	-	-	0.574 (51/88)
4	106709748	AG	A	Mroh7	ENSMUST00000106770.7	c.1335-33delC		intron_variant	1	-	-	-	-	-	-	-	-	-	0.5 (15/32)
4	107037631	A	G	Ssbp3	ENSMUST00000030367.14	c.746A>G	p.Asn249Ser	missense_variant	1	-	-	-	-	-	-	-	-	-	0.563 (47/89)
4	107057426	C	A	Mrpl37	ENSMUST00000030365.5	c.1140G>T	p.Gln380His	missense_variant	1	-	-	-	-	-	-	-	-	-	0.348 (21/60)
4	107147688	G	A	Tceanc2	ENSMUST00000030362.11	c.262C>T	p.Arg88Cys	missense_variant	1	-	-	-	-	-	-	-	-	-	0.49 (24/53)
4	107233773	C	G	Lrrc42	ENSMUST00000030360.10	c.1224G>C	p.Val408Val	synonymous_variant	1	-	-	-	-	-	-	-	-	-	0.532 (39/72)
4	107386602	G	C	Ndc1	ENSMUST00000139560.7	c.994G>C	p.Ala332Pro	missense_variant	1	-	-	-	-	-	-	-	-	-	0.184 (37/190)
4	107680830	T	A	Dmrtb1	ENSMUST00000069271.4	c.608A>T	p.Asp203Val	missense_variant	1	-	-	-	-	-	-	-	-	-	0.633 (26/39)
4	107851661	C	A	Lrp8	ENSMUST00000143601.7	c.1351+36C>A		intron_variant	1	-	-	-	-	-	-	-	-	-	0.362 (25/71)
4	107851662	G	T	Lrp8	ENSMUST00000143601.7	c.1351+37G>T		intron_variant	1	-	-	-	-	-	-	-	-	-	0.362 (24/69)
4	108201282	G	A	Zyg11a	ENSMUST00000043793.6	c.1054C>T	p.Arg352Trp	missense_variant	1	-	-	-	-	-	-	-	-	-	0.397 (27/69)
4	108507885	T	G	Zcchc11	ENSMUST00000097925.8	c.1576-22T>G		intron_variant	1	-	-	-	-	-	-	-	-	-	0.37 (84/213)
4	108642207	T	G	Zfyve9	ENSMUST00000106657.7	c.3913A>C	p.Ser1305Arg	missense_variant	1	-	-	-	-	-	-	-	-	-	0.542 (60/117)
4	108642207	T	G	Gm17354	ENSMUST00000170933.1	n.-4766A>C		upstream_gene_variant	1	-	-	-	-	-	-	-	-	-	0.542 (60/117)
4	108834855	G	A	Txndc12	ENSMUST00000030296.8	c.90G>A	p.Lys30Lys	splice_region_variant&synonymous_variant	1	-	-	-	-	-	-	-	-	-	0.569 (76/126)
4	108834855	G	A	Btf3l4	ENSMUST00000102739.1	c.-4284C>T		upstream_gene_variant	1	-	-	-	-	-	-	-	-	-	0.569 (76/126)
4	109840356	A	G	Faf1	ENSMUST00000102724.4	c.878A>G	p.Asp293Gly	missense_variant	1	-	-	-	-	-	-	-	-	-	0.2 (33/172)
4	110660839	T	A	Agbl4	ENSMUST00000097920.8	c.282+80664T>A		intron_variant	1	-	-	-	-	-	-	-	-	-	0.414 (30/72)
4	111526643	G	T	Agbl4	ENSMUST00000097920.8	c.694G>T	p.Gly232Trp	missense_variant	1	-	-	-	-	-	-	-	-	-	0.508 (37/79)
4	111617242	TG	T	Agbl4	ENSMUST00000097920.8	c.1232delG	p.Gly411fs	frameshift_variant	1	-	-	-	-	-	-	-	-	-	0.455 (52/106)
4	111980129	A	G	Skint7	ENSMUST00000163281.1	c.103A>G	p.Arg35Gly	missense_variant	1	-	-	-	-	-	-	-	-	-	0.188 (15/78)
4	112253902	C	A	Skint3	ENSMUST00000170945.1	c.223C>A	p.Leu75Met	missense_variant	1	-	-	-	-	-	-	-	-	-	0.537 (85/161)
4	112892014	T	A	Skint6	ENSMUST00000138966.8	c.2368A>T	p.Ile790Phe	missense_variant	1	-	-	-	-	-	-	-	-	-	0.185 (16/84)
4	113238291	G	GCC	Skint6	ENSMUST00000138966.8	c.169_170insGG	p.Ala57fs	frameshift_variant	1	-	-	-	-	-	-	-	-	-	0.479 (76/163)
4	113238293	TTG	T	Skint6	ENSMUST00000138966.8	c.166_167delCA	p.Gln56fs	frameshift_variant	1	-	-	-	-	-	-	-	-	-	0.479 (79/170)
4	113875945	A	C	Skint5	ENSMUST00000169631.7	c.1219+41T>G		intron_variant	1	-	-	-	-	-	-	-	-	-	0.512 (75/146)
4	114194772	A	T	Skint11	ENSMUST00000164297.7	c.316A>T	p.Asn106Tyr	missense_variant	1	-	-	-	-	-	-	-	-	-	0.507 (83/162)
4	114231681	G	T	Skint11	ENSMUST00000164297.7	c.671G>T	p.Trp224Leu	missense_variant	1	-	-	-	-	-	-	-	-	-	0.524 (24/47)
4	115329003	G	T	Cyp4a12a	ENSMUST00000084343.3	c.1358+1G>T		splice_donor_variant&intron_variant	1	-	-	-	-	-	-	-	-	-	0.45 (29/68)
4	115470959	G	T	Cyp4a30b	ENSMUST00000119958.2	c.1424G>T	p.Arg475Leu	missense_variant	1	-	-	-	-	-	-	-	-	-	0.453 (56/129)
4	115490017	G	C	Cyp4a14	ENSMUST00000030487.2	c.1223C>G	p.Ala408Gly	missense_variant	1	-	-	-	-	-	-	-	-	-	0.557 (59/108)
4	115496099	TA	T	Cyp4a14	ENSMUST00000030487.2	c.14delT	p.Leu5fs	frameshift_variant	1	-	-	-	-	-	-	-	-	-	0.522 (17/32)
4	115518326	G	T	Cyp4a10	ENSMUST00000058785.9	c.5G>T	p.Ser2Ile	missense_variant	1	-	-	-	-	-	-	-	-	-	0.496 (83/168)
4	115524352	G	A	Cyp4a10	ENSMUST00000058785.9	c.612G>A	p.Lys204Lys	synonymous_variant	1	-	-	-	-	-	-	-	-	-	0.263 (60/229)
4	116537885	G	T	Ipp	ENSMUST00000030461.4	c.1616G>T	p.Gly539Val	missense_variant	1	-	-	-	-	-	-	-	-	-	0.546 (83/148)
4	116687481	C	G	Prdx1	ENSMUST00000106470.7	c.64C>G	p.Pro22Ala	missense_variant	1	-	-	-	-	-	-	-	-	-	0.472 (75/154)
4	116990263	G	C	Urod	ENSMUST00000030446.14	c.*24C>G		3_prime_UTR_variant	1	-	-	-	-	-	-	-	-	-	0.226 (15/75)
4	116990263	G	C	Zswim5	ENSMUST00000044823.3	c.*2930G>C		downstream_gene_variant	1	-	-	-	-	-	-	-	-	-	0.226 (15/75)
4	116991312	C	A	Hectd3	ENSMUST00000050067.9	c.-4091C>A		upstream_gene_variant	1	-	-	-	-	-	-	-	-	-	0.509 (28/60)
4	116991312	C	A	Zswim5	ENSMUST00000044823.3	c.*3979C>A		downstream_gene_variant	1	-	-	-	-	-	-	-	-	-	0.509 (28/60)
4	116991312	C	A	Urod	ENSMUST00000030446.14	c.876-14G>T		intron_variant	1	-	-	-	-	-	-	-	-	-	0.509 (28/60)
4	117109346	C	A	Ptch2	ENSMUST00000030443.11	c.1518C>A	p.Ser506Ser	synonymous_variant	1	-	-	-	-	-	-	-	-	-	0.636 (15/26)
4	117109443	G	A	Ptch2	ENSMUST00000030443.11	c.1590+25G>A		intron_variant	1	-	-	-	-	-	-	-	-	-	0.357 (11/34)
4	117145263	G	T	Gm13015	ENSMUST00000118674.1	n.-3660G>T		upstream_gene_variant	1	-	-	-	-	-	-	-	-	-	0.407 (12/29)
4	117145263	G	T	Best4-ps	ENSMUST00000129783.1	n.7G>T		non_coding_transcript_exon_variant	1	-	-	-	-	-	-	-	-	-	0.407 (12/29)
4	117146540	C	T	Gm13015	ENSMUST00000118674.1	n.-2383C>T		upstream_gene_variant	1	-	-	-	-	-	-	-	-	-	0.619 (62/102)
4	117146540	C	T	Best4-ps	ENSMUST00000129783.1	n.524C>T		non_coding_transcript_exon_variant	1	-	-	-	-	-	-	-	-	-	0.619 (62/102)
4	117681890	T	A	Dmap1	ENSMUST00000102687.3	c.48A>T	p.Pro16Pro	synonymous_variant	1	-	-	-	-	-	-	-	-	-	0.671 (70/104)
4	117760351	G	T	Klf17	ENSMUST00000062747.5	c.808C>A	p.Arg270Ser	missense_variant	1	-	-	-	-	-	-	-	-	-	0.524 (55/102)
4	117857366	C	A	Slc6a9	ENSMUST00000163288.1	c.495C>A	p.Asp165Glu	missense_variant	1	-	-	-	-	-	-	-	-	-	0.303 (14/41)
4	117857366	C	A	Gm17114	ENSMUST00000164716.1	n.385+10808G>T		intron_variant	1	-	-	-	-	-	-	-	-	-	0.303 (14/41)
4	117903304	C	A	Ipo13	ENSMUST00000036156.5	c.1885-40G>T		intron_variant	1	-	-	-	-	-	-	-	-	-	0.357 (12/31)
4	117904630	C	A	Ipo13	ENSMUST00000036156.5	c.1372G>T	p.Glu458*	stop_gained	1	-	-	-	-	-	-	-	-	-	0.4 (20/50)
4	118153190	C	T	Kdm4a	ENSMUST00000097911.8	c.1855G>A	p.Glu619Lys	missense_variant&splice_region_variant	1	-	-	-	-	-	-	-	-	-	0.526 (15/26)
4	118177502	T	A	Kdm4a	ENSMUST00000097911.8	c.31A>T	p.Ser11Cys	missense_variant	1	-	-	-	-	-	-	-	-	-	0.587 (55/93)
4	118369264	A	T	Szt2	ENSMUST00000075406.11	c.8995-10T>A		intron_variant	1	-	-	-	-	-	-	-	-	-	0.367 (13/36)
4	118387930	C	A	Szt2	ENSMUST00000075406.11	c.3431-23G>T		intron_variant	1	-	-	-	-	-	-	-	-	-	0.619 (28/49)
4	118393976	A	C	Szt2	ENSMUST00000075406.11	c.934T>G	p.Leu312Val	missense_variant	1	-	-	-	-	-	-	-	-	-	0.5 (8/16)
4	118474177	G	A	Tie1	ENSMUST00000047421.5	c.3028C>T	p.Arg1010Cys	missense_variant	1	-	-	-	-	-	-	-	-	-	0.605 (26/41)
4	118480407	T	G	Tie1	ENSMUST00000047421.5	c.1486+4A>C		splice_region_variant&intron_variant	1	-	-	-	-	-	-	-	-	-	0.323 (13/37)
4	118614699	G	T	Cfap57	ENSMUST00000071972.10	c.474+8C>A		splice_region_variant&intron_variant	1	-	-	-	-	-	-	-	-	-	0.387 (26/69)
4	118621146	A	C	Ebna1bp2	ENSMUST00000030501.14	c.131A>C	p.Lys44Thr	missense_variant	1	-	-	-	-	-	-	-	-	-	0.069 (9/124)
4	118621146	A	C	Cfap57	ENSMUST00000071972.10	c.-741T>G		upstream_gene_variant	1	-	-	-	-	-	-	-	-	-	0.069 (9/124)
4	118665826	A	C	Olfr62	ENSMUST00000102666.3	c.308A>C	p.Gln103Pro	missense_variant	1	-	-	-	-	-	-	-	-	-	0.283 (32/118)
4	118690272	G	T	Olfr1342	ENSMUST00000060562.4	c.179C>A	p.Thr60Lys	missense_variant	1	-	-	-	-	-	-	-	-	-	0.417 (18/45)
4	118708390	A	G	Olfr1341	ENSMUST00000061215.5	c.-1019A>G		upstream_gene_variant	1	-	-	-	-	-	-	-	-	-	0.651 (68/104)
4	118708390	A	G	Olfr1342-Olfr1341	ENSMUSG00000043383-ENSMUSG00000046790	n.118708390A>G		intergenic_region	1	-	-	-	-	-	-	-	-	-	0.651 (68/104)
4	118727141	A	G	Olfr1340	ENSMUST00000094834.4	c.893A>G	p.Lys298Arg	missense_variant	1	-	-	-	-	-	-	-	-	-	0.585 (42/66)
4	118782329	C	T	Olfr1337	ENSMUST00000077247.1	c.255G>A	p.Leu85Leu	synonymous_variant	1	-	-	-	-	-	-	-	-	-	0.573 (157/267)
4	118835994	C	A	Olfr1333	ENSMUST00000106361.1	c.7+60G>T		intron_variant	1	-	-	-	-	-	-	-	-	-	0.565 (93/162)
4	118933918	T	G	Olfr1328	ENSMUST00000081960.3	c.923A>C	p.His308Pro	missense_variant	1	-	-	-	-	-	-	-	-	-	0.276 (56/199)
4	118968440	C	A	Lao1	ENSMUST00000058651.4	c.1456C>A	p.His486Asn	missense_variant	1	-	-	-	-	-	-	-	-	-	0.627 (39/63)
4	118968440	C	A	Gm12861	ENSMUST00000145395.1	n.-2857C>A		upstream_gene_variant	1	-	-	-	-	-	-	-	-	-	0.627 (39/63)
4	119132090	A	T	Gm12867	ENSMUST00000151216.1	n.-1089T>A		upstream_gene_variant	1	-	-	-	-	-	-	-	-	-	0.625 (10/16)
4	119132090	A	T	Gm12868	ENSMUST00000143801.1	n.*1659T>A		downstream_gene_variant	1	-	-	-	-	-	-	-	-	-	0.625 (10/16)
4	119132090	A	T	Mir1957a	ENSMUST00000157927.1	n.*2246A>T		downstream_gene_variant	1	-	-	-	-	-	-	-	-	-	0.625 (10/16)
4	119132090	A	T	Slc2a1	ENSMUST00000030398.9	c.115-33A>T		intron_variant	1	-	-	-	-	-	-	-	-	-	0.625 (10/16)
4	119421551	C	A	Zmynd12	ENSMUST00000094819.4	c.-1335C>A		upstream_gene_variant	1	-	-	-	-	-	-	-	-	-	0.636 (25/37)
4	119421551	C	A	Ppcs	ENSMUST00000030385.12	c.612+29G>T		intron_variant	1	-	-	-	-	-	-	-	-	-	0.636 (25/37)
4	119422877	G	T	Zmynd12	ENSMUST00000094819.4	c.-9G>T		5_prime_UTR_premature_start_codon_gain_variant&5_prime_UTR_variant	1	-	-	-	-	-	-	-	-	-	0.588 (13/20)
4	119422877	G	T	Ppcs	ENSMUST00000030385.12	c.-524C>A		upstream_gene_variant	1	-	-	-	-	-	-	-	-	-	0.588 (13/20)
4	119470576	C	A	Rimkla	ENSMUST00000049994.7	c.576G>T	p.Val192Val	synonymous_variant	1	-	-	-	-	-	-	-	-	-	0.533 (20/35)
4	120103707	T	G	Hivep3	ENSMUST00000106307.8	c.4963-5T>G		splice_region_variant&intron_variant	1	-	-	-	-	-	-	-	-	-	0.667 (16/30)
4	120478042	G	T	Scmh1	ENSMUST00000064991.12	c.423G>T	p.Leu141Phe	missense_variant	1	-	-	-	-	-	-	-	-	-	0.538 (83/152)
4	120542743	G	C	Ctps	ENSMUST00000030381.7	c.1416C>G	p.Asp472Glu	missense_variant	1	-	-	-	-	-	-	-	-	-	0.3 (39/130)
4	120698497	A	C	Kcnq4	ENSMUST00000030376.7	c.1878+2T>G		splice_donor_variant&intron_variant	1	-	-	-	-	-	-	-	-	-	0.108 (16/140)
4	120790487	C	A	Nfyc	ENSMUST00000043429.11	c.-6G>T		splice_region_variant&5_prime_UTR_premature_start_codon_gain_variant&5_prime_UTR_variant	1	-	-	-	-	-	-	-	-	-	0.447 (19/42)
4	121150428	C	T	Rlf	ENSMUST00000056635.11	c.1684G>A	p.Glu562Lys	missense_variant	1	-	-	-	-	-	-	-	-	-	0.25 (26/107)
4	121324808	G	T	Gm12888	ENSMUST00000097905.2	c.86C>A	p.Pro29His	missense_variant	1	-	-	-	-	-	-	-	-	-	0.345 (48/139)
4	122951839	G	C	Mfsd2a	ENSMUST00000030408.11	c.518C>G	p.Thr173Ser	missense_variant	1	-	-	-	-	-	-	-	-	-	0.314 (14/44)
4	122959311	G	T	Mfsd2a	ENSMUST00000030408.11	c.184C>A	p.Leu62Met	missense_variant	1	-	-	-	-	-	-	-	-	-	0.667 (18/27)
4	122959311	G	T	4933421A08Rik	ENSMUST00000135313.1	n.-1998G>T		upstream_gene_variant	1	-	-	-	-	-	-	-	-	-	0.667 (18/27)
4	123039621	G	T	Trit1	ENSMUST00000102649.3	c.315+35G>T		intron_variant	1	-	-	-	-	-	-	-	-	-	0.381 (27/70)
4	123295274	G	A	Pabpc4	ENSMUST00000080178.12	c.1406G>A	p.Gly469Asp	missense_variant	1	-	-	-	-	-	-	-	-	-	0.373 (21/59)
4	123295274	G	A	Gm25788	ENSMUST00000082721.1	n.*3800G>A		downstream_gene_variant	1	-	-	-	-	-	-	-	-	-	0.373 (21/59)
4	123295274	G	A	Gm22154	ENSMUST00000083844.1	n.*1992G>A		downstream_gene_variant	1	-	-	-	-	-	-	-	-	-	0.373 (21/59)
4	123295746	G	T	Pabpc4	ENSMUST00000080178.12	c.1454-4G>T		splice_region_variant&intron_variant	1	-	-	-	-	-	-	-	-	-	0.609 (53/84)
4	123295746	G	T	Gm25788	ENSMUST00000082721.1	n.*4272G>T		downstream_gene_variant	1	-	-	-	-	-	-	-	-	-	0.609 (53/84)
4	123295746	G	T	Gm22154	ENSMUST00000083844.1	n.*2464G>T		downstream_gene_variant	1	-	-	-	-	-	-	-	-	-	0.609 (53/84)
4	123322538	G	T	Oxct2a	ENSMUST00000102640.1	c.1049C>A	p.Pro350Gln	missense_variant	1	-	-	-	-	-	-	-	-	-	0.655 (19/29)
4	123322538	G	T	Bmp8a	ENSMUST00000040496.5	c.664+2023C>A		intron_variant	1	-	-	-	-	-	-	-	-	-	0.655 (19/29)
4	123860875	T	C	4933427I04Rik	ENSMUST00000097896.2	c.581T>C	p.Leu194Pro	missense_variant	1	-	-	-	-	-	-	-	-	-	0.316 (14/43)
4	123860875	T	C	1700121C08Rik	ENSMUST00000137546.1	n.-1362A>G		upstream_gene_variant	1	-	-	-	-	-	-	-	-	-	0.316 (14/43)
4	124574330	G	T	Gm27247	ENSMUST00000184062.1	n.331-45313C>A		intron_variant	1	-	-	-	-	-	-	-	-	-	0.343 (14/42)
4	124574330	G	T	4933407E24Rik	ENSMUST00000133499.1	n.654G>T		non_coding_transcript_exon_variant	1	-	-	-	-	-	-	-	-	-	0.343 (14/42)
4	124610705	T	A	3100002H09Rik	ENSMUST00000053604.2	c.53A>T	p.Asp18Val	missense_variant	1	-	-	-	-	-	-	-	-	-	0.321 (22/68)
4	124610705	T	A	Gm27247	ENSMUST00000184062.1	n.330+46135A>T		intron_variant	1	-	-	-	-	-	-	-	-	-	0.321 (22/68)
4	124797840	CA	C	Inpp5b	ENSMUST00000094782.9	c.2558delA	p.Gln853fs	frameshift_variant	1	-	-	-	-	-	-	-	-	-	0.25 (19/79)
4	124797840	CA	C	Mtf1	ENSMUST00000030723.2	c.-6870delA		upstream_gene_variant	1	-	-	-	-	-	-	-	-	-	0.25 (19/79)
4	124883942	T	C	Epha10	ENSMUST00000149146.1	c.-1859T>C		upstream_gene_variant&intragenic_variant	1	-	-	-	-	-	-	-	-	-	0.415 (23/55)
4	124885775	G	C	Epha10	ENSMUST00000149146.1	c.-26G>C		upstream_gene_variant&intragenic_variant	1	-	-	-	-	-	-	-	-	-	0.45 (22/54)
4	126034368	G	T	Csf3r	ENSMUST00000030673.6	c.846+29G>T		intron_variant	1	-	-	-	-	-	-	-	-	-	0.7 (15/21)
4	126520190	C	A	Ago4	ENSMUST00000084289.4	c.306+1G>T		splice_donor_variant&intron_variant	1	-	-	-	-	-	-	-	-	-	0.44 (13/32)
4	126520190	C	A	Gm12935	ENSMUST00000119352.1	n.-1479C>A		upstream_gene_variant	1	-	-	-	-	-	-	-	-	-	0.44 (13/32)
4	126520190	C	A	Gm12934	ENSMUST00000119221.1	n.*4140G>T		downstream_gene_variant	1	-	-	-	-	-	-	-	-	-	0.44 (13/32)
4	126719538	A	G	Tfap2e	ENSMUST00000048194.7	c.920T>C	p.Leu307Pro	missense_variant	1	-	-	-	-	-	-	-	-	-	0.556 (13/24)
4	127026929	G	T	Sfpq	ENSMUST00000030623.7	c.1791+43G>T		intron_variant	1	-	-	-	-	-	-	-	-	-	0.37 (25/66)
4	128618650	G	T	Tlr12	ENSMUST00000074829.3	c.-195C>A		upstream_gene_variant	1	-	-	-	-	-	-	-	-	-	0.571 (9/18)
4	128618650	G	T	Tlr12-Gm12958	ENSMUSG00000062545-ENSMUSG00000084891	n.128618650G>T		intergenic_region	1	-	-	-	-	-	-	-	-	-	0.571 (9/18)
4	129078905	A	T	Rnf19b	ENSMUST00000030584.10	c.1256-2A>T		splice_acceptor_variant&intron_variant	1	-	-	-	-	-	-	-	-	-	0.565 (76/139)
4	129150957	T	C	S100pbp	ENSMUST00000049081.11	c.1184A>G	p.Gln395Arg	missense_variant	1	-	-	-	-	-	-	-	-	-	0.256 (12/50)
4	129225410	C	A	C77080	ENSMUST00000052602.5	c.516G>T	p.Thr172Thr	synonymous_variant	1	-	-	-	-	-	-	-	-	-	0.591 (14/24)
4	129341521	G	C	Zbtb8os	ENSMUST00000141235.7	c.167G>C	p.Cys56Ser	missense_variant	1	-	-	-	-	-	-	-	-	-	0.469 (71/149)
4	129542616	T	A	Hdac1	ENSMUST00000102597.4	c.14A>T	p.Gln5Leu	missense_variant	1	-	-	-	-	-	-	-	-	-	0.37 (13/33)
4	129600575	C	A	Tmem234	ENSMUST00000102591.9	c.-141C>A		upstream_gene_variant	1	-	-	-	-	-	-	-	-	-	0.517 (17/33)
4	129600575	C	A	Eif3i	ENSMUST00000102593.10	c.3+19G>T		intron_variant	1	-	-	-	-	-	-	-	-	-	0.517 (17/33)
4	129648078	T	A	Kpna6	ENSMUST00000102590.10	c.1525A>T	p.Ser509Cys	missense_variant	1	-	-	-	-	-	-	-	-	-	0.512 (24/47)
4	130017563	G	T	Adgrb2	ENSMUST00000030571.6	c.3641G>T	p.Cys1214Phe	missense_variant	1	-	-	-	-	-	-	-	-	-	0.333 (32/89)
4	130073183	G	T	Col16a1	ENSMUST00000044565.14	c.2701-57G>T		intron_variant	1	-	-	-	-	-	-	-	-	-	0.583 (25/43)
4	130166314	T	A	Tinagl1	ENSMUST00000030560.8	c.1249A>T	p.Ile417Phe	missense_variant	1	-	-	-	-	-	-	-	-	-	0.233 (11/53)
4	130221704	T	A	Gm853	ENSMUST00000023884.6	c.50A>T	p.His17Leu	missense_variant	1	-	-	-	-	-	-	-	-	-	0.381 (8/23)
4	130253995	C	A	Serinc2	ENSMUST00000120126.8	c.1315G>T	p.Gly439Trp	missense_variant	1	-	-	-	-	-	-	-	-	-	0.524 (11/22)
4	130327183	C	A	Zcchc17	ENSMUST00000134159.2	c.564+10G>T		intron_variant	1	-	-	-	-	-	-	-	-	-	0.57 (54/94)
4	130532574	G	T	Nkain1	ENSMUST00000105993.3	c.532+30C>A		intron_variant	1	-	-	-	-	-	-	-	-	-	0.26 (16/63)
4	131489114	G	T	Gm831	ENSMUST00000149942.1	n.449G>T		non_coding_transcript_exon_variant	1	-	-	-	-	-	-	-	-	-	0.303 (13/43)
4	131820939	A	C	Ptpru	ENSMUST00000030741.8	c.246T>G	p.Gly82Gly	synonymous_variant	1	-	-	-	-	-	-	-	-	-	0.467 (8/18)
4	132270198	G	A	Taf12	ENSMUST00000105963.1	c.-11809G>A		upstream_gene_variant	1	-	-	-	-	-	-	-	-	-	0.074 (14/162)
4	132270198	G	A	Gm28874	ENSMUST00000190917.1	n.*1357G>A		downstream_gene_variant	1	-	-	-	-	-	-	-	-	-	0.074 (14/162)
4	132270198	G	A	Gm28872	ENSMUST00000191518.1	n.143G>A		non_coding_transcript_exon_variant	1	-	-	-	-	-	-	-	-	-	0.074 (14/162)
4	132270198	G	A	Rnu11	ENSMUST00000104135.1	n.16C>T		non_coding_transcript_exon_variant	1	-	-	-	-	-	-	-	-	-	0.074 (14/162)
4	132499312	C	A	Sesn2	ENSMUST00000030724.8	c.470G>T	p.Arg157Leu	missense_variant	1	-	-	-	-	-	-	-	-	-	0.333 (12/32)
4	132499312	C	A	Gm12981	ENSMUST00000131733.1	n.*4249G>T		downstream_gene_variant	1	-	-	-	-	-	-	-	-	-	0.333 (12/32)
4	132580632	A	G	Ptafr	ENSMUST00000070690.7	c.*306A>G		3_prime_UTR_variant	1	-	-	-	-	-	-	-	-	-	0.548 (54/97)
4	133190100	A	T	Wasf2	ENSMUST00000084241.11	c.538-29A>T		intron_variant	1	-	-	-	-	-	-	-	-	-	0.583 (8/13)
4	133268388	C	T	Tmem222	ENSMUST00000105907.8	c.408+21G>A		intron_variant	1	-	-	-	-	-	-	-	-	-	0.739 (22/29)
4	133486681	C	A	Fam46b	ENSMUST00000051676.6	c.862C>A	p.Arg288Arg	synonymous_variant	1	-	-	-	-	-	-	-	-	-	0.64 (19/29)
4	133486681	C	A	Gm13257	ENSMUST00000132840.1	n.-4155G>T		upstream_gene_variant	1	-	-	-	-	-	-	-	-	-	0.64 (19/29)
4	133486681	C	A	Trnp1	ENSMUST00000125541.1	c.*11105G>T		downstream_gene_variant	1	-	-	-	-	-	-	-	-	-	0.64 (19/29)
4	133486682	G	T	Fam46b	ENSMUST00000051676.6	c.863G>T	p.Arg288Leu	missense_variant	1	-	-	-	-	-	-	-	-	-	0.64 (19/29)
4	133486682	G	T	Gm13257	ENSMUST00000132840.1	n.-4156C>A		upstream_gene_variant	1	-	-	-	-	-	-	-	-	-	0.64 (19/29)
4	133486682	G	T	Trnp1	ENSMUST00000125541.1	c.*11104C>A		downstream_gene_variant	1	-	-	-	-	-	-	-	-	-	0.64 (19/29)
4	133533395	C	A	Kdf1	ENSMUST00000042919.15	c.*3026C>A		downstream_gene_variant	1	-	-	-	-	-	-	-	-	-	0.391 (32/79)
4	133533395	C	A	Nudc	ENSMUST00000030665.6	c.828+11G>T		intron_variant	1	-	-	-	-	-	-	-	-	-	0.391 (32/79)
4	133556134	C	A	Nr0b2	ENSMUST00000042706.2	c.681C>A	p.Leu227Leu	synonymous_variant	1	-	-	-	-	-	-	-	-	-	0.423 (14/33)
4	133556134	C	A	Gm23158	ENSMUST00000175076.2	n.*2690G>T		downstream_gene_variant	1	-	-	-	-	-	-	-	-	-	0.423 (14/33)
4	133966694	G	A	Dhdds	ENSMUST00000105887.7	c.*4323C>T		downstream_gene_variant	1	-	-	-	-	-	-	-	-	-	0.369 (28/76)
4	133966694	G	A	Hmgn2	ENSMUST00000123234.7	c.153+72C>T		intron_variant	1	-	-	-	-	-	-	-	-	-	0.369 (28/76)
4	134082660	C	A	Aim1l	ENSMUST00000121391.7	c.3722C>A	p.Pro1241His	missense_variant	1	-	-	-	-	-	-	-	-	-	0.6 (30/51)
4	134082660	C	A	Cd52	ENSMUSG00000000682	n.134082660G>T		intragenic_variant	1	-	-	-	-	-	-	-	-	-	0.6 (30/51)
4	134200338	C	G	Gm7534	ENSMUST00000097849.2	c.1103G>C	p.Arg368Pro	missense_variant	1	-	-	-	-	-	-	-	-	-	0.536 (18/33)
4	134200338	C	G	Gm13131	ENSMUST00000122228.1	n.-188G>C		upstream_gene_variant	1	-	-	-	-	-	-	-	-	-	0.536 (18/33)
4	134202677	A	G	Gm7534	ENSMUST00000097849.2	c.316T>C	p.Ser106Pro	missense_variant	1	-	-	-	-	-	-	-	-	-	0.094 (17/190)
4	134202677	A	G	Gm13131	ENSMUST00000122228.1	n.-2527T>C		upstream_gene_variant	1	-	-	-	-	-	-	-	-	-	0.094 (17/190)
4	134213742	G	T	Catsper4	ENSMUST00000055892.9	c.1044C>A	p.Thr348Thr	synonymous_variant	1	-	-	-	-	-	-	-	-	-	0.657 (59/88)
4	134232135	A	T	Cnksr1	ENSMUST00000030645.8	c.1187T>A	p.Leu396Gln	missense_variant	1	-	-	-	-	-	-	-	-	-	0.455 (12/26)
4	134232135	A	T	Catsper4	ENSMUST00000055892.9	c.-4798T>A		upstream_gene_variant	1	-	-	-	-	-	-	-	-	-	0.455 (12/26)
4	134245282	C	T	E130218I03Rik	ENSMUST00000122952.7	c.*408C>T		3_prime_UTR_variant	1	-	-	-	-	-	-	-	-	-	0.5 (9/19)
4	134245282	C	T	Gm30191	ENSMUST00000205501.1	c.-1736C>T		upstream_gene_variant	1	-	-	-	-	-	-	-	-	-	0.5 (9/19)
4	134245282	C	T	Zfp593	ENSMUST00000030644.7	c.200+22G>A		intron_variant	1	-	-	-	-	-	-	-	-	-	0.5 (9/19)
4	134344089	G	T	Slc30a2	ENSMUST00000105874.8	c.132G>T	p.Gln44His	missense_variant	1	-	-	-	-	-	-	-	-	-	0.409 (11/28)
4	134359841	G	T	Extl1	ENSMUST00000030643.2	c.1411-6C>A		splice_region_variant&intron_variant	1	-	-	-	-	-	-	-	-	-	0.328 (24/70)
4	134530679	C	G	Mtfr1l	ENSMUST00000102550.9	c.230+1G>C		splice_donor_variant&intron_variant	1	-	-	-	-	-	-	-	-	-	0.419 (32/73)
4	134532126	C	A	Mtfr1l	ENSMUST00000102550.9	c.120+18G>T		intron_variant	1	-	-	-	-	-	-	-	-	-	0.333 (12/37)
4	134879975	G	T	Rhd	ENSMUST00000030627.7	c.418G>T	p.Val140Leu	missense_variant	1	-	-	-	-	-	-	-	-	-	0.609 (35/59)
4	134884524	C	A	Rhd	ENSMUST00000030627.7	c.652C>A	p.Leu218Ile	missense_variant	1	-	-	-	-	-	-	-	-	-	0.486 (22/46)
4	134903744	T	A	Tmem50a	ENSMUST00000030626.11	c.275-2A>T		splice_acceptor_variant&intron_variant	1	-	-	-	-	-	-	-	-	-	0.349 (18/50)
4	134936964	G	T	Syf2	ENSMUST00000030622.2	c.688G>T	p.Ala230Ser	missense_variant	1	-	-	-	-	-	-	-	-	-	0.4 (15/35)
4	135764820	G	T	Myom3	ENSMUST00000105854.1	c.274G>T	p.Val92Leu	missense_variant	1	-	-	-	-	-	-	-	-	-	0.321 (10/34)
4	136240201	TG	T	Asap3	ENSMUST00000047526.7	c.1832+1delG		splice_donor_variant&intron_variant	1	-	-	-	-	-	-	-	-	-	0.667 (15/22)
4	136316351	T	A	Hnrnpr	ENSMUST00000105850.7	c.158-10T>A		intron_variant	1	-	-	-	-	-	-	-	-	-	0.339 (30/81)
4	136882145	C	G	C1qb	ENSMUST00000046384.8	c.163G>C	p.Gly55Arg	missense_variant	1	-	-	-	-	-	-	-	-	-	0.65 (32/50)
4	136938696	C	A	Epha8	ENSMUST00000030420.8	c.1148G>T	p.Arg383Leu	missense_variant	1	-	-	-	-	-	-	-	-	-	0.387 (14/34)
4	136995463	C	G	Zbtb40	ENSMUST00000049583.7	c.2303G>C	p.Arg768Pro	missense_variant	1	-	-	-	-	-	-	-	-	-	0.417 (10/27)
4	137454992	C	A	1700013G24Rik	ENSMUST00000048893.3	c.457C>A	p.Pro153Thr	missense_variant	1	-	-	-	-	-	-	-	-	-	0.542 (31/58)
4	137604637	G	GA	Usp48	ENSMUST00000055131.12	c.254dupA	p.Asn86fs	frameshift_variant&splice_region_variant	1	-	-	-	-	-	-	-	-	-	0.608 (60/97)
4	137743654	G	T	Alpl	ENSMUST00000030551.10	c.1170C>A	p.Pro390Pro	synonymous_variant	1	-	-	-	-	-	-	-	-	-	0.5 (14/32)
4	137754010	G	C	Alpl	ENSMUST00000030551.10	c.330C>G	p.Ser110Arg	missense_variant	1	-	-	-	-	-	-	-	-	-	0.28 (10/31)
4	138203379	G	T	Eif4g3	ENSMUST00000203828.2	c.4995G>T	p.Val1665Val	synonymous_variant	1	-	-	-	-	-	-	-	-	-	0.403 (29/77)
4	138305073	G	T	Kif17	ENSMUST00000030539.9	c.*3646G>T		downstream_gene_variant	1	-	-	-	-	-	-	-	-	-	0.571 (8/15)
4	138305073	G	T	Ddost	ENSMUST00000030538.4	c.160+35G>T		intron_variant	1	-	-	-	-	-	-	-	-	-	0.571 (8/15)
4	138610721	T	G	Vwa5b1	ENSMUST00000030533.11	c.283+4A>C		splice_region_variant&intron_variant	1	-	-	-	-	-	-	-	-	-	0.68 (21/32)
4	138996343	G	C	Tmco4	ENSMUST00000043042.9	c.171-55G>C		intron_variant	1	-	-	-	-	-	-	-	-	-	0.256 (11/48)
4	139347897	C	A	Emc1	ENSMUST00000082262.7	c.-4723C>A		upstream_gene_variant	1	-	-	-	-	-	-	-	-	-	0.593 (18/32)
4	139347897	C	A	Ccnd3-ps	ENSMUST00000117963.1	n.-1717G>T		upstream_gene_variant	1	-	-	-	-	-	-	-	-	-	0.593 (18/32)
4	139347897	C	A	Gm13019	ENSMUST00000120000.1	n.*4564C>A		downstream_gene_variant	1	-	-	-	-	-	-	-	-	-	0.593 (18/32)
4	139347897	C	A	Mrto4	ENSMUST00000102503.9	c.570+24G>T		intron_variant	1	-	-	-	-	-	-	-	-	-	0.593 (18/32)
4	139396536	C	G	Ubr4	ENSMUST00000097822.9	c.1019-21C>G		intron_variant	1	-	-	-	-	-	-	-	-	-	0.286 (24/79)
4	139400385	G	T	Ubr4	ENSMUST00000097822.9	c.1693G>T	p.Asp565Tyr	missense_variant	1	-	-	-	-	-	-	-	-	-	0.515 (19/39)
4	139402660	G	T	Ubr4	ENSMUST00000097822.9	c.2090G>T	p.Gly697Val	missense_variant	1	-	-	-	-	-	-	-	-	-	0.378 (17/50)
4	139410145	C	G	Ubr4	ENSMUST00000097822.9	c.3040C>G	p.Pro1014Ala	missense_variant	1	-	-	-	-	-	-	-	-	-	0.383 (29/81)
4	139420588	G	T	Ubr4	ENSMUST00000097822.9	c.4953+18G>T		intron_variant	1	-	-	-	-	-	-	-	-	-	0.4 (9/20)
4	139967797	G	T	Klhdc7a	ENSMUST00000105031.3	c.-163C>A		5_prime_UTR_premature_start_codon_gain_variant&5_prime_UTR_variant	1	-	-	-	-	-	-	-	-	-	0.514 (18/38)
4	139967797	G	T	Mir2139	ENSMUST00000158669.1	n.-177C>A		upstream_gene_variant	1	-	-	-	-	-	-	-	-	-	0.514 (18/38)
4	140067215	A	T	Igsf21	ENSMUST00000039331.8	c.346T>A	p.Cys116Ser	missense_variant	1	-	-	-	-	-	-	-	-	-	0.5 (34/70)
4	140795671	G	T	Padi3	ENSMUST00000026377.8	c.989C>A	p.Ala330Glu	missense_variant	1	-	-	-	-	-	-	-	-	-	0.314 (13/42)
4	140829379	C	G	Padi1	ENSMUST00000026378.3	c.516G>C	p.Ser172Ser	synonymous_variant	1	-	-	-	-	-	-	-	-	-	0.549 (33/59)
4	141005117	A	T	Atp13a2	ENSMUST00000037055.13	c.2692A>T	p.Ser898Cys	missense_variant	1	-	-	-	-	-	-	-	-	-	0.69 (24/33)
4	141465803	CG	C	Zbtb17	ENSMUST00000006377.12	c.1636delG	p.Glu546fs	frameshift_variant	1	-	-	-	-	-	-	-	-	-	0.313 (12/40)
4	141465803	CG	C	Spen	ENSMUST00000105786.2	c.*3102delC		downstream_gene_variant	1	-	-	-	-	-	-	-	-	-	0.313 (12/40)
4	141595371	C	T	Fblim1	ENSMUST00000006381.10	c.100G>A	p.Ala34Thr	missense_variant	1	-	-	-	-	-	-	-	-	-	0.636 (20/28)
4	141622163	C	A	Tmem82	ENSMUST00000053263.8	c.-4177G>T		upstream_gene_variant	1	-	-	-	-	-	-	-	-	-	0.833 (18/21)
4	141622163	C	A	Plekhm2	ENSMUST00000084203.10	c.*4407G>T		downstream_gene_variant	1	-	-	-	-	-	-	-	-	-	0.833 (18/21)
4	141622163	C	A	Slc25a34	ENSMUST00000038661.7	c.639+41G>T		intron_variant	1	-	-	-	-	-	-	-	-	-	0.833 (18/21)
4	141821391	G	T	Cela2a	ENSMUST00000102481.3	c.433C>A	p.Pro145Thr	missense_variant	1	-	-	-	-	-	-	-	-	-	0.436 (33/69)
4	141821391	G	T	Ctrc	ENSMUSG00000062478	n.141821391C>A		intragenic_variant	1	-	-	-	-	-	-	-	-	-	0.436 (33/69)
4	143572252	T	C	BC080695	ENSMUST00000105765.9	c.764T>C	p.Ile255Thr	missense_variant	1	-	-	-	-	-	-	-	-	-	0.074 (16/234)
4	143615962	A	T	Gm13083	ENSMUST00000105773.1	c.638A>T	p.Asp213Val	missense_variant	1	-	-	-	-	-	-	-	-	-	0.287 (42/153)
4	143615962	A	T	Gm13080	ENSMUST00000120556.1	n.-3885T>A		upstream_gene_variant	1	-	-	-	-	-	-	-	-	-	0.287 (42/153)
4	143696945	G	C	Gm13089	ENSMUST00000073532.4	c.1273C>G	p.His425Asp	missense_variant	1	-	-	-	-	-	-	-	-	-	0.306 (38/120)
4	143811898	GT	G	Gm13084	ENSMUST00000075045.3	c.501delA	p.Glu167fs	frameshift_variant	1	-	-	-	-	-	-	-	-	-	0.214 (20/87)
4	143853110	A	G	Gm13103	ENSMUST00000094522.7	c.1264A>G	p.Ser422Gly	missense_variant	1	-	-	-	-	-	-	-	-	-	0.573 (138/242)
4	143895684	T	A	Pramef6	ENSMUST00000105767.1	c.1100A>T	p.Gln367Leu	missense_variant	1	-	-	-	-	-	-	-	-	-	0.445 (73/164)
4	143950123	C	A	Pramef25	ENSMUST00000105766.1	c.410G>T	p.Gly137Val	missense_variant	1	-	-	-	-	-	-	-	-	-	0.602 (61/105)
4	144160229	A	C	Oog3	ENSMUST00000050933.8	c.320T>G	p.Leu107Arg	missense_variant	1	-	-	-	-	-	-	-	-	-	0.292 (33/122)
4	144207199	CTG	C	C87977	ENSMUST00000105757.7	c.1335_1336delCA	p.His445fs	frameshift_variant	1	-	-	-	-	-	-	-	-	-	0.538 (174/323)
4	144207461	A	G	C87977	ENSMUST00000105757.7	c.1075T>C	p.Phe359Leu	missense_variant	1	-	-	-	-	-	-	-	-	-	0.291 (34/117)
4	144273860	G	T	Pramel5	ENSMUST00000035757.12	c.145C>A	p.Arg49Ser	missense_variant	1	-	-	-	-	-	-	-	-	-	0.369 (77/209)
4	144519921	G	C	9430007A20Rik	ENSMUST00000030328.2	c.36G>C	p.Val12Val	synonymous_variant	1	-	-	-	-	-	-	-	-	-	0.288 (27/103)
4	144522397	C	T	9430007A20Rik	ENSMUST00000030328.2	c.333C>T	p.Pro111Pro	synonymous_variant	1	-	-	-	-	-	-	-	-	-	0.273 (9/37)
4	144522397	C	T	Gm13121	ENSMUST00000120637.1	n.*4014G>A		downstream_gene_variant	1	-	-	-	-	-	-	-	-	-	0.273 (9/37)
4	144528884	TA	T	9430007A20Rik	ENSMUST00000030328.2	c.877delA	p.Arg293fs	frameshift_variant	1	-	-	-	-	-	-	-	-	-	0.088 (9/108)
4	144528884	TA	T	Gm13121	ENSMUST00000120637.1	n.-1843delT		upstream_gene_variant	1	-	-	-	-	-	-	-	-	-	0.088 (9/108)
4	144622810	C	A	Gm13177	ENSMUST00000094510.3	c.636C>A	p.Leu212Leu	synonymous_variant	1	-	-	-	-	-	-	-	-	-	0.444 (36/80)
4	144703325	C	A	Gm13178	ENSMUST00000036876.7	c.1093G>T	p.Gly365Trp	missense_variant	1	-	-	-	-	-	-	-	-	-	0.598 (79/135)
4	145107067	C	A	Vps13d	ENSMUST00000036579.13	c.8294G>T	p.Trp2765Leu	missense_variant	1	-	-	-	-	-	-	-	-	-	0.579 (38/69)
4	145467929	A	G	Smarca5-ps	ENSMUST00000121843.1	n.*509A>G		downstream_gene_variant	1	-	-	-	-	-	-	-	-	-	0.123 (19/152)
4	145467929	A	G	Gm13229	ENSMUST00000118238.1	n.*1782T>C		downstream_gene_variant	1	-	-	-	-	-	-	-	-	-	0.123 (19/152)
4	145467929	A	G	Smarca5-ps-Gm13229	ENSMUSG00000052912-ENSMUSG00000087076	n.145467929A>G		intergenic_region	1	-	-	-	-	-	-	-	-	-	0.123 (19/152)
4	145622347	A	G	Gm13212	ENSMUST00000105739.7	c.353A>G	p.Lys118Arg	missense_variant	1	-	-	-	-	-	-	-	-	-	0.069 (26/400)
4	145622347	A	G	Gm26763	ENSMUST00000180968.1	n.463-19754T>C		intron_variant	1	-	-	-	-	-	-	-	-	-	0.069 (26/400)
4	145898903	T	C	Zfp986	ENSMUST00000123460.1	c.158-26T>C		intron_variant	1	-	-	-	-	-	-	-	-	-	0.241 (61/286)
4	146466184	C	A	Zfp992	ENSMUST00000105733.2	c.361C>A	p.Pro121Thr	missense_variant	1	-	-	-	-	-	-	-	-	-	0.109 (12/110)
4	146466184	C	A	Gm26573	ENSMUST00000181199.1	n.1421-180731G>T		intron_variant	1	-	-	-	-	-	-	-	-	-	0.109 (12/110)
4	146536894	T	C	Zfp981	ENSMUST00000105735.8	c.275T>C	p.Val92Ala	missense_variant	1	-	-	-	-	-	-	-	-	-	0.105 (55/562)
4	146536894	T	C	1700095A21Rik	ENSMUST00000145269.1	n.180+9223A>G		intron_variant	1	-	-	-	-	-	-	-	-	-	0.105 (55/562)
4	146536894	T	C	Gm26573	ENSMUST00000181199.1	n.1421-251441A>G		intron_variant	1	-	-	-	-	-	-	-	-	-	0.105 (55/562)
4	147541156	A	C	Gm16503	ENSMUST00000104964.2	c.106A>C	p.Thr36Pro	missense_variant	1	-	-	-	-	-	-	-	-	-	0.303 (61/199)
4	147682327	T	A	Zfp534	ENSMUST00000117638.1	c.-31A>T		5_prime_UTR_variant	1	-	-	-	-	-	-	-	-	-	0.27 (10/37)
4	147761293	G	T	Zfp984	ENSMUST00000105734.9	c.-28-15C>A		intron_variant	1	-	-	-	-	-	-	-	-	-	0.088 (38/451)
4	147890156	G	A	Mfn2	ENSMUST00000030884.9	c.432C>T	p.Ala144Ala	synonymous_variant	1	-	-	-	-	-	-	-	-	-	0.441 (16/40)
4	147890156	G	A	Gm13156	ENSMUST00000118348.1	n.-3517G>A		upstream_gene_variant	1	-	-	-	-	-	-	-	-	-	0.441 (16/40)
4	147923200	C	A	Plod1	ENSMUST00000019199.13	c.1024G>T	p.Gly342Cys	missense_variant	1	-	-	-	-	-	-	-	-	-	0.478 (12/24)
4	147927940	G	T	Plod1	ENSMUST00000019199.13	c.646+518C>A		intron_variant	1	-	-	-	-	-	-	-	-	-	0.5 (28/53)
4	148270371	T	A	Ptchd2	ENSMUST00000047720.8	c.1181+6A>T		splice_region_variant&intron_variant	1	-	-	-	-	-	-	-	-	-	0.448 (16/34)
4	148454605	A	C	Mtor	ENSMUST00000103221.9	c.558A>C	p.Gln186His	missense_variant	1	-	-	-	-	-	-	-	-	-	0.195 (21/102)
4	148496269	G	C	Angptl7	ENSMUST00000030840.3	c.900C>G	p.Arg300Arg	synonymous_variant	1	-	-	-	-	-	-	-	-	-	0.289 (14/45)
4	148496269	G	C	Mtor	ENSMUST00000103221.9	c.4253+4503G>C		intron_variant	1	-	-	-	-	-	-	-	-	-	0.289 (14/45)
4	148549793	C	T	Mtor	ENSMUST00000103221.9	c.7092C>T	p.Val2364Val	splice_region_variant&synonymous_variant	1	-	-	-	-	-	-	-	-	-	0.551 (77/134)
4	148568527	A	G	Gm13204	ENSMUST00000120110.1	n.*529T>C		downstream_gene_variant	1	-	-	-	-	-	-	-	-	-	0.247 (27/102)
4	148568527	A	G	Exosc10	ENSMUST00000017408.13	c.1586+12A>G		intron_variant	1	-	-	-	-	-	-	-	-	-	0.247 (27/102)
4	148667447	G	T	Gm572	ENSMUST00000105698.2	c.757+11G>T		intron_variant	1	-	-	-	-	-	-	-	-	-	0.435 (10/23)
4	148674615	G	T	Gm572	ENSMUST00000105698.2	c.*3187G>T		downstream_gene_variant	1	-	-	-	-	-	-	-	-	-	0.44 (11/27)
4	148674615	G	T	Gm572-Gm13203	ENSMUSG00000070577-ENSMUSG00000087273	n.148674615G>T		intergenic_region	1	-	-	-	-	-	-	-	-	-	0.44 (11/27)
4	148944480	C	A	Casz1	ENSMUST00000122222.7	c.3381C>A	p.Pro1127Pro	synonymous_variant	1	-	-	-	-	-	-	-	-	-	0.538 (9/15)
4	148944480	C	A	Gm13205	ENSMUST00000123548.1	n.*3012G>T		downstream_gene_variant	1	-	-	-	-	-	-	-	-	-	0.538 (9/15)
4	149223289	C	A	Kif1b	ENSMUST00000060537.12	c.2478G>T	p.Ala826Ala	synonymous_variant	1	-	-	-	-	-	-	-	-	-	0.52 (38/71)
4	149266298	T	G	Kif1b	ENSMUST00000060537.12	c.818A>C	p.Lys273Thr	missense_variant	1	-	-	-	-	-	-	-	-	-	0.259 (24/106)
4	149654847	TG	T	Pik3cd	ENSMUST00000105690.8	c.1932delC	p.Lys645fs	frameshift_variant	1	-	-	-	-	-	-	-	-	-	0.465 (56/124)
4	149654847	TG	T	Mir7023	ENSMUST00000185093.1	n.*656delC		downstream_gene_variant	1	-	-	-	-	-	-	-	-	-	0.465 (56/124)
4	150158686	C	A	Slc2a7	ENSMUST00000059893.7	c.942+21C>A		intron_variant	1	-	-	-	-	-	-	-	-	-	0.478 (12/24)
4	150468783	A	G	Rere	ENSMUST00000105682.8	c.611A>G	p.Asp204Gly	missense_variant	1	-	-	-	-	-	-	-	-	-	0.224 (22/100)
4	150867319	G	C	Errfi1	ENSMUST00000030811.1	c.1203G>C	p.Pro401Pro	synonymous_variant	1	-	-	-	-	-	-	-	-	-	0.479 (46/92)
4	151144385	G	T	Camta1	ENSMUST00000049790.13	c.1989C>A	p.His663Gln	missense_variant	1	-	-	-	-	-	-	-	-	-	0.5 (14/24)
4	151933783	G	A	Dnajc11	ENSMUST00000062904.10	c.31G>A	p.Asp11Asn	missense_variant	1	-	-	-	-	-	-	-	-	-	0.424 (18/46)
4	152087623	G	A	Plekhg5	ENSMUSG00000039713	n.152087623G>A		intragenic_variant	1	-	-	-	-	-	-	-	-	-	0.667 (14/21)
4	152119221	G	T	Tnfrsf25	ENSMUST00000025706.9	c.785G>T	p.Gly262Val	missense_variant	1	-	-	-	-	-	-	-	-	-	0.5 (19/35)
4	152119221	G	T	Plekhg5	ENSMUST00000105661.9	c.*4382G>T		downstream_gene_variant	1	-	-	-	-	-	-	-	-	-	0.5 (19/35)
4	152378479	G	A	Chd5	ENSMUST00000030775.11	c.4199G>A	p.Arg1400Lys	missense_variant	1	-	-	-	-	-	-	-	-	-	0.476 (29/62)
4	152507537	G	T	Nphp4	ENSMUST00000056567.5	c.1122+54G>T		intron_variant	1	-	-	-	-	-	-	-	-	-	0.682 (16/25)
4	153960665	CG	C	A430005L14Rik	ENSMUST00000058393.8	c.265delG	p.Val89fs	frameshift_variant	1	-	-	-	-	-	-	-	-	-	0.476 (22/49)
4	153960665	CG	C	Dffb	ENSMUST00000030893.2	c.*4704delC		downstream_gene_variant	1	-	-	-	-	-	-	-	-	-	0.476 (22/49)
4	153972843	G	T	Dffb	ENSMUST00000030893.2	c.376C>A	p.Leu126Met	missense_variant	1	-	-	-	-	-	-	-	-	-	0.5 (20/38)
4	153972843	G	T	Cep104	ENSMUST00000047497.14	c.-6140G>T		upstream_gene_variant	1	-	-	-	-	-	-	-	-	-	0.5 (20/38)
4	154023653	G	C	Lrrc47	ENSMUST00000169622.7	c.*3777G>C		downstream_gene_variant	1	-	-	-	-	-	-	-	-	-	0.438 (16/35)
4	154023653	G	C	Ccdc27	ENSMUST00000047207.6	c.*3081C>G		downstream_gene_variant	1	-	-	-	-	-	-	-	-	-	0.438 (16/35)
4	154023653	G	C	Smim1	ENSMUST00000125533.8	c.110+35C>G		intron_variant	1	-	-	-	-	-	-	-	-	-	0.438 (16/35)
4	154035804	C	G	Ccdc27	ENSMUST00000047207.6	c.1347G>C	p.Leu449Leu	synonymous_variant	1	-	-	-	-	-	-	-	-	-	0.59 (28/48)
4	154061484	G	A	Trp73	ENSMUST00000105644.8	c.1365C>T	p.Asn455Asn	synonymous_variant	1	-	-	-	-	-	-	-	-	-	0.467 (9/19)
4	154067012	G	T	Trp73	ENSMUST00000105644.8	c.727C>A	p.Gln243Lys	missense_variant&splice_region_variant	1	-	-	-	-	-	-	-	-	-	0.688 (14/20)
4	154263372	C	A	Megf6	ENSMUST00000030897.14	c.2453-21C>A		intron_variant	1	-	-	-	-	-	-	-	-	-	0.516 (19/38)
4	154341786	C	A	Prdm16	ENSMUST00000105638.8	c.1541G>T	p.Gly514Val	missense_variant	1	-	-	-	-	-	-	-	-	-	0.733 (23/31)
4	154341786	C	A	B230104I21Rik	ENSMUST00000181143.1	c.85+474C>A		intron_variant	1	-	-	-	-	-	-	-	-	-	0.733 (23/31)
4	154666832	G	T	Actrt2	ENSMUST00000060062.4	c.846C>A	p.Asn282Lys	missense_variant	1	-	-	-	-	-	-	-	-	-	0.55 (25/49)
4	154898989	A	C	Fam213b	ENSMUST00000030935.9	c.17T>G	p.Leu6Arg	missense_variant	1	-	-	-	-	-	-	-	-	-	0.444 (9/23)
4	154898989	A	C	Mmel1	ENSMUST00000105634.7	c.*3764A>C		downstream_gene_variant	1	-	-	-	-	-	-	-	-	-	0.444 (9/23)
4	155354680	G	C	Prkcz	ENSMUST00000030922.14	c.308C>G	p.Pro103Arg	missense_variant	1	-	-	-	-	-	-	-	-	-	0.5 (70/149)
4	155356468	C	T	Prkcz	ENSMUST00000030922.14	c.242G>A	p.Arg81His	missense_variant	1	-	-	-	-	-	-	-	-	-	0.195 (10/47)
4	155426118	C	G	Cfap74	ENSMUST00000151083.7	c.1159C>G	p.Arg387Gly	missense_variant	1	-	-	-	-	-	-	-	-	-	0.422 (26/61)
4	155426118	C	G	5830444B04Rik	ENSMUST00000166921.7	n.-4414G>C		upstream_gene_variant	1	-	-	-	-	-	-	-	-	-	0.422 (26/61)
4	155466171	C	A	Tmem52	ENSMUST00000178238.7	c.-2974C>A		upstream_gene_variant	1	-	-	-	-	-	-	-	-	-	0.441 (18/40)
4	155466171	C	A	Cfap74	ENSMUST00000151083.7	c.4636-133C>A		intron_variant	1	-	-	-	-	-	-	-	-	-	0.441 (18/40)
4	155661141	G	C	Mib2	ENSMUST00000103176.9	c.212C>G	p.Ala71Gly	missense_variant	1	-	-	-	-	-	-	-	-	-	0.239 (23/85)
4	155715618	T	C	Gm22573	ENSMUST00000082982.1	n.*4422A>G		downstream_gene_variant	1	-	-	-	-	-	-	-	-	-	0.567 (41/68)
4	155715618	T	C	Ssu72	ENSMUST00000030905.8	c.224+13T>C		intron_variant	1	-	-	-	-	-	-	-	-	-	0.567 (41/68)
4	155715619	G	T	Gm22573	ENSMUST00000082982.1	n.*4421C>A		downstream_gene_variant	1	-	-	-	-	-	-	-	-	-	0.567 (42/69)
4	155715619	G	T	Ssu72	ENSMUST00000030905.8	c.224+14G>T		intron_variant	1	-	-	-	-	-	-	-	-	-	0.567 (42/69)
4	155753650	A	C	Atad3a	ENSMUST00000030903.11	c.678-14T>G		intron_variant	1	-	-	-	-	-	-	-	-	-	0.286 (42/134)
4	155832763	G	T	Aurkaip1	ENSMUST00000084097.11	c.467G>T	p.Arg156Leu	missense_variant	1	-	-	-	-	-	-	-	-	-	0.442 (28/57)
4	155872826	A	C	Cptp	ENSMUST00000030950.7	c.-5592T>G		upstream_gene_variant	1	-	-	-	-	-	-	-	-	-	0.424 (45/110)
4	155872826	A	C	Cpsf3l	ENSMUST00000030901.8	c.127-24A>C		intron_variant	1	-	-	-	-	-	-	-	-	-	0.424 (45/110)
4	155946445	TG	T	Ube2j2	ENSMUST00000024056.9	c.36+38delG		intron_variant	1	-	-	-	-	-	-	-	-	-	0.613 (22/37)
4	156014204	G	T	Sdf4	ENSMUST00000050078.12	c.*4254G>T		downstream_gene_variant	1	-	-	-	-	-	-	-	-	-	0.522 (15/27)
4	156014204	G	T	Gm37090	ENSMUST00000195694.1	n.*4352C>A		downstream_gene_variant	1	-	-	-	-	-	-	-	-	-	0.522 (15/27)
4	156014204	G	T	Tnfrsf4	ENSMUST00000030952.5	c.134-24G>T		intron_variant	1	-	-	-	-	-	-	-	-	-	0.522 (15/27)
4	156047045	T	A	Ttll10	ENSMUST00000184348.7	c.668-35A>T		intron_variant	1	-	-	-	-	-	-	-	-	-	0.293 (21/71)
4	156048517	C	G	Ttll10	ENSMUST00000184348.7	c.109G>C	p.Ala37Pro	missense_variant	1	-	-	-	-	-	-	-	-	-	0.567 (35/62)
4	156048517	C	G	Gm13648	ENSMUST00000138361.1	n.*4198G>C		downstream_gene_variant	1	-	-	-	-	-	-	-	-	-	0.567 (35/62)
4	156122011	G	C	9430015G10Rik	ENSMUST00000072554.12	c.227G>C	p.Gly76Ala	missense_variant	1	-	-	-	-	-	-	-	-	-	0.491 (33/67)
4	156223431	C	G	Plekhn1	ENSMUST00000105571.2	c.1037G>C	p.Gly346Ala	missense_variant	1	-	-	-	-	-	-	-	-	-	0.314 (12/38)
4	156223431	C	G	Perm1	ENSMUST00000105572.2	c.*3209C>G		downstream_gene_variant	1	-	-	-	-	-	-	-	-	-	0.314 (12/38)
7	3868069	C	A	Gm10693	ENSMUST00000205904.1	n.754G>T		non_coding_transcript_exon_variant	1	-	-	-	-	-	-	-	-	-	0.467 (21/45)
7	3915074	C	T	Lilra6	ENSMUST00000038176.14	c.71-1G>A		splice_acceptor_variant&intron_variant	1	-	-	-	-	-	-	-	-	-	0.329 (83/255)
7	4143905	G	T	Leng8	ENSMUST00000121270.7	c.1425G>T	p.Arg475Arg	synonymous_variant	1	-	-	-	-	-	-	-	-	-	0.333 (10/31)
7	4143905	G	T	Leng9	ENSMUST00000058358.7	c.*4313C>A		downstream_gene_variant	1	-	-	-	-	-	-	-	-	-	0.333 (10/31)
7	4522282	C	A	Gm15873	ENSMUST00000123390.1	n.-4254C>A		upstream_gene_variant	1	-	-	-	-	-	-	-	-	-	0.286 (12/46)
7	4522282	C	A	Dnaaf3	ENSMUST00000094897.4	c.*1034G>T		downstream_gene_variant	1	-	-	-	-	-	-	-	-	-	0.286 (12/46)
7	4522282	C	A	Tnni3	ENSMUST00000098859.9	c.11+23G>T		intron_variant	1	-	-	-	-	-	-	-	-	-	0.286 (12/46)
7	4752147	C	A	Cox6b2	ENSMUST00000182173.1	c.127G>T	p.Val43Leu	missense_variant	1	-	-	-	-	-	-	-	-	-	0.404 (26/60)
7	4752147	C	A	Suv420h2	ENSMUST00000098853.8	c.*5256C>A		downstream_gene_variant	1	-	-	-	-	-	-	-	-	-	0.404 (26/60)
7	4752147	C	A	Fam71e2	ENSMUST00000174409.1	c.*1428G>T		downstream_gene_variant	1	-	-	-	-	-	-	-	-	-	0.404 (26/60)
7	5196287	A	T	Vmn1r56	ENSMUST00000169556.2	c.330T>A	p.Pro110Pro	synonymous_variant	1	-	-	-	-	-	-	-	-	-	0.315 (89/287)
7	5410904	A	C	Vmn1r58	ENSMUST00000108569.2	c.326T>G	p.Val109Gly	missense_variant	1	-	-	-	-	-	-	-	-	-	0.208 (60/293)
7	5410904	A	C	Gm44543	ENSMUST00000209136.1	n.-3832A>C		upstream_gene_variant	1	-	-	-	-	-	-	-	-	-	0.208 (60/293)
7	6570048	C	A	Olfr1350	ENSMUST00000070985.3	c.56C>A	p.Pro19His	missense_variant	1	-	-	-	-	-	-	-	-	-	0.32 (26/87)
7	6709564	A	C	Peg3	ENSMUST00000051209.10	c.2658T>G	p.Ser886Ser	synonymous_variant	1	-	-	-	-	-	-	-	-	-	0.347 (29/88)
7	6718402	A	C	Peg3	ENSMUST00000051209.10	c.16+24T>G		intron_variant	1	-	-	-	-	-	-	-	-	-	0.262 (23/77)
7	6995514	TG	T	Aurkc	ENSMUST00000086248.6	c.74delG	p.Gly25fs	frameshift_variant	1	-	-	-	-	-	-	-	-	-	0.3 (45/132)
7	6995514	TG	T	Zfp264	ENSMUST00000208781.1	n.*4428delG		downstream_gene_variant	1	-	-	-	-	-	-	-	-	-	0.3 (45/132)
7	7231693	G	T	Vmn2r29	ENSMUST00000170922.1	c.2193C>A	p.Leu731Leu	synonymous_variant	1	-	-	-	-	-	-	-	-	-	0.302 (100/345)
7	7231693	G	T	RP24-77E13.10	ENSMUST00000210333.1	c.*2666C>A		downstream_gene_variant&intragenic_variant	1	-	-	-	-	-	-	-	-	-	0.302 (100/345)
7	7394243	T	G	Vmn2r31	ENSMUST00000075108.7	c.1015A>C	p.Thr339Pro	missense_variant	1	-	-	-	-	-	-	-	-	-	0.294 (10/34)
7	8605362	T	C	Vmn2r-ps49	ENSMUST00000173160.1	n.834A>G		non_coding_transcript_exon_variant	1	-	-	-	-	-	-	-	-	-	0.324 (12/37)
7	9015033	G	T	Vmn2r39	ENSMUST00000174388.2	c.2303C>A	p.Ala768Asp	missense_variant	1	-	-	-	-	-	-	-	-	-	0.45 (99/221)
7	10038066	G	T	Vmn2r50	ENSMUST00000074943.7	c.1755C>A	p.Pro585Pro	synonymous_variant	1	-	-	-	-	-	-	-	-	-	0.339 (87/254)
7	10088057	G	T	Vmn2r51	ENSMUST00000094863.4	c.1700C>A	p.Thr567Asn	missense_variant	1	-	-	-	-	-	-	-	-	-	0.34 (115/328)
7	10099908	G	A	Vmn2r51	ENSMUST00000094863.4	c.1202C>T	p.Ala401Val	missense_variant	1	-	-	-	-	-	-	-	-	-	0.303 (117/399)
7	10169069	C	T	Vmn2r52	ENSMUST00000164918.1	c.1431G>A	p.Gly477Gly	synonymous_variant	1	-	-	-	-	-	-	-	-	-	0.323 (55/175)
7	10170915	G	C	Vmn2r52	ENSMUST00000164918.1	c.996C>G	p.Gly332Gly	synonymous_variant	1	-	-	-	-	-	-	-	-	-	0.225 (29/139)
7	10171200	A	C	Vmn2r52	ENSMUST00000164918.1	c.711T>G	p.Ile237Met	missense_variant	1	-	-	-	-	-	-	-	-	-	0.326 (33/103)
7	10274285	C	T	Vmn1r66	ENSMUST00000060374.4	c.820G>A	p.Val274Ile	missense_variant	1	-	-	-	-	-	-	-	-	-	0.246 (18/76)
7	10364257	C	T	Nlrp4d	ENSMUST00000182420.7	n.2540G>A		non_coding_transcript_exon_variant	1	-	-	-	-	-	-	-	-	-	0.194 (9/47)
7	10580096	G	C	Vmn1r69	ENSMUST00000163658.1	c.707C>G	p.Ser236Cys	missense_variant	1	-	-	-	-	-	-	-	-	-	0.25 (19/82)
7	10748560	AT	A	Vmn1r71	ENSMUST00000079113.3	c.199delA	p.Met67fs	frameshift_variant	1	-	-	-	-	-	-	-	-	-	0.333 (19/57)
7	10748560	AT	A	RP23-44P12.3	ENSMUST00000210233.1	n.*2335delT		downstream_gene_variant	1	-	-	-	-	-	-	-	-	-	0.333 (19/57)
7	10989076	C	T	RP24-96C7.7	ENSMUST00000211273.1	n.1009G>A		non_coding_transcript_exon_variant	1	-	-	-	-	-	-	-	-	-	0.308 (49/146)
7	11756956	C	A	Vmn1r73	ENSMUST00000055070.1	c.700C>A	p.Gln234Lys	missense_variant	1	-	-	-	-	-	-	-	-	-	0.256 (34/144)
7	11847009	T	A	Vmn1r74	ENSMUST00000050416.1	c.235T>A	p.Phe79Ile	missense_variant	1	-	-	-	-	-	-	-	-	-	0.286 (36/126)
7	11847009	T	A	RP23-442K7.6	ENSMUST00000210930.1	n.-1289A>T		upstream_gene_variant	1	-	-	-	-	-	-	-	-	-	0.286 (36/126)
7	11930568	C	A	Vmn1r76	ENSMUST00000058772.1	c.718G>T	p.Ala240Ser	missense_variant	1	-	-	-	-	-	-	-	-	-	0.318 (64/198)
7	12601304	A	T	Vmn2r53	ENSMUST00000170412.1	c.428T>A	p.Leu143His	missense_variant	1	-	-	-	-	-	-	-	-	-	0.387 (69/180)
7	12601304	A	T	Gm15773	ENSMUST00000118665.1	n.-1892A>T		upstream_gene_variant	1	-	-	-	-	-	-	-	-	-	0.387 (69/180)
7	12715806	A	T	Vmn2r56	ENSMUST00000163852.1	c.504T>A	p.Ile168Ile	synonymous_variant	1	-	-	-	-	-	-	-	-	-	0.312 (54/175)
7	13628651	A	T	Sult2a5	ENSMUST00000108525.3	c.346-64A>T		intron_variant	1	-	-	-	-	-	-	-	-	-	0.238 (22/93)
7	13835967	C	A	Sult2a1	ENSMUST00000108522.4	c.339G>T	p.Lys113Asn	missense_variant	1	-	-	-	-	-	-	-	-	-	0.331 (62/182)
7	15397196	C	T	Obox2	ENSMUST00000036575.15	c.226C>T	p.Pro76Ser	missense_variant	1	-	-	-	-	-	-	-	-	-	0.13 (33/256)
7	15397196	C	T	Obox1	ENSMUSG00000054310	n.15397196C>T		intragenic_variant	1	-	-	-	-	-	-	-	-	-	0.13 (33/256)
7	15626224	C	A	Obox3	ENSMUST00000086122.9	c.519G>T	p.Glu173Asp	missense_variant	1	-	-	-	-	-	-	-	-	-	0.306 (86/281)
7	16077940	C	T	Zfp541	ENSMUST00000108509.1	c.549-32C>T		intron_variant	1	-	-	-	-	-	-	-	-	-	0.412 (19/44)
7	16675583	G	T	Ceacam15	ENSMUST00000108498.2	c.26C>A	p.Pro9His	missense_variant	1	-	-	-	-	-	-	-	-	-	0.314 (11/38)
7	16789738	G	C	Slc1a5	ENSMUST00000108496.8	c.706-39G>C		intron_variant	1	-	-	-	-	-	-	-	-	-	0.35 (8/21)
7	17041088	C	T	Hif3a	ENSMUST00000108492.8	c.1584G>A	p.Ser528Ser	synonymous_variant	1	-	-	-	-	-	-	-	-	-	0.35 (9/24)
7	17155048	A	G	Ceacam3	ENSMUST00000108491.7	c.741A>G	p.Glu247Glu	synonymous_variant	1	-	-	-	-	-	-	-	-	-	0.307 (45/141)
7	17745324	C	T	Ceacam5	ENSMUST00000081907.7	c.425-60C>T		intron_variant	1	-	-	-	-	-	-	-	-	-	0.25 (15/61)
7	18345816	C	A	Psg18	ENSMUST00000003597.14	c.*28G>T		3_prime_UTR_variant	1	-	-	-	-	-	-	-	-	-	0.267 (31/112)
7	18354787	C	A	Psg18	ENSMUST00000003597.14	c.31G>T	p.Gly11Trp	missense_variant	1	-	-	-	-	-	-	-	-	-	0.338 (105/293)
7	18652272	C	A	Psg21	ENSMUST00000094793.11	c.781+7G>T		splice_region_variant&intron_variant	1	-	-	-	-	-	-	-	-	-	0.259 (76/284)
7	18988382	C	A	Nanos2	ENSMUST00000063563.8	c.*367C>A		3_prime_UTR_variant	1	-	-	-	-	-	-	-	-	-	0.39 (27/68)
7	18988382	C	A	Mypop	ENSMUST00000059331.8	c.-3728C>A		upstream_gene_variant	1	-	-	-	-	-	-	-	-	-	0.39 (27/68)
7	18988382	C	A	Gm45058	ENSMUST00000205810.1	n.-58G>T		upstream_gene_variant	1	-	-	-	-	-	-	-	-	-	0.39 (27/68)
7	18988382	C	A	Gm10676	ENSMUST00000098778.2	n.*1172G>T		downstream_gene_variant	1	-	-	-	-	-	-	-	-	-	0.39 (27/68)
7	18988383	C	A	Nanos2	ENSMUST00000063563.8	c.*368C>A		3_prime_UTR_variant	1	-	-	-	-	-	-	-	-	-	0.39 (27/69)
7	18988383	C	A	Mypop	ENSMUST00000059331.8	c.-3727C>A		upstream_gene_variant	1	-	-	-	-	-	-	-	-	-	0.39 (27/69)
7	18988383	C	A	Gm45058	ENSMUST00000205810.1	n.-59G>T		upstream_gene_variant	1	-	-	-	-	-	-	-	-	-	0.39 (27/69)
7	18988383	C	A	Gm10676	ENSMUST00000098778.2	n.*1171G>T		downstream_gene_variant	1	-	-	-	-	-	-	-	-	-	0.39 (27/69)
7	19264488	T	A	Vasp	ENSMUST00000032561.8	c.260A>T	p.Gln87Leu	missense_variant	1	-	-	-	-	-	-	-	-	-	0.293 (20/70)
7	19264488	T	A	1700058P15Rik	ENSMUST00000159981.1	n.*4749T>A		downstream_gene_variant	1	-	-	-	-	-	-	-	-	-	0.293 (20/70)
7	19385668	A	C	Ercc2	ENSMUST00000062831.15	c.406A>C	p.Ser136Arg	missense_variant	1	-	-	-	-	-	-	-	-	-	0.344 (14/38)
7	19385668	A	C	Mir343	ENSMUST00000102360.2	n.-975A>C		upstream_gene_variant	1	-	-	-	-	-	-	-	-	-	0.344 (14/38)
7	19385668	A	C	Gm26852	ENSMUST00000180691.2	n.4831+2220T>G		intron_variant	1	-	-	-	-	-	-	-	-	-	0.344 (14/38)
7	19703094	G	A	Tomm40	ENSMUST00000032555.9	c.815C>T	p.Ala272Val	missense_variant	1	-	-	-	-	-	-	-	-	-	0.323 (11/38)
7	19703094	G	A	Apoe	ENSMUST00000003066.15	c.-4864C>T		upstream_gene_variant	1	-	-	-	-	-	-	-	-	-	0.323 (11/38)
7	24303811	C	G	Zfp94	ENSMUST00000108436.7	c.205G>C	p.Glu69Gln	missense_variant	1	-	-	-	-	-	-	-	-	-	0.313 (20/59)
7	24303811	C	G	Zfp61	ENSMUST00000077780.13	c.-7830G>C		upstream_gene_variant	1	-	-	-	-	-	-	-	-	-	0.313 (20/59)
7	24547839	G	T	Xrcc1	ENSMUST00000063249.8	c.101G>T	p.Arg34Leu	missense_variant	1	-	-	-	-	-	-	-	-	-	0.429 (15/40)
7	24547839	G	T	Pinlyp	ENSMUST00000011776.7	c.-1846C>A		upstream_gene_variant	1	-	-	-	-	-	-	-	-	-	0.429 (15/40)
7	24616965	G	A	Phldb3	ENSMUST00000073325.5	c.684+5G>A		splice_region_variant&intron_variant	1	-	-	-	-	-	-	-	-	-	0.36 (13/31)
7	24746171	G	T	Cd177	ENSMUST00000063956.6	c.1846C>A	p.Gln616Lys	missense_variant	1	-	-	-	-	-	-	-	-	-	0.444 (14/33)
7	25013804	T	A	Grik5	ENSMUST00000003468.9	c.2378A>T	p.Asp793Val	missense_variant	1	-	-	-	-	-	-	-	-	-	0.45 (9/21)
7	25631143	T	C	Bckdha	ENSMUST00000071329.7	c.1027A>G	p.Ser343Gly	missense_variant	1	-	-	-	-	-	-	-	-	-	0.4 (17/43)
7	25631143	T	C	B3gnt8	ENSMUST00000076034.7	c.*1827T>C		downstream_gene_variant&intragenic_variant	1	-	-	-	-	-	-	-	-	-	0.4 (17/43)
7	25733195	C	A	Hnrnpul1	ENSMUST00000206832.1	c.1392+49G>T		intron_variant	1	-	-	-	-	-	-	-	-	-	0.25 (21/86)
7	26081642	C	G	Cyp2b13	ENSMUST00000005669.8	c.485-7C>G		splice_region_variant&intron_variant	1	-	-	-	-	-	-	-	-	-	0.341 (36/103)
7	26085847	T	A	Cyp2b13	ENSMUST00000005669.8	c.646-6T>A		splice_region_variant&intron_variant	1	-	-	-	-	-	-	-	-	-	0.353 (20/59)
7	26199025	C	G	Cyp2b9	ENSMUST00000082214.4	c.823-19C>G		intron_variant	1	-	-	-	-	-	-	-	-	-	0.243 (57/231)
7	26307323	G	T	Cyp2a4	ENSMUST00000098657.4	c.106G>T	p.Gly36*	stop_gained	1	-	-	-	-	-	-	-	-	-	0.322 (21/68)
7	26307323	G	T	Gm44963	ENSMUST00000206226.1	n.-37C>A		upstream_gene_variant	1	-	-	-	-	-	-	-	-	-	0.322 (21/68)
7	26310841	C	T	Cyp2a4	ENSMUST00000098657.4	c.790C>T	p.Pro264Ser	missense_variant	1	-	-	-	-	-	-	-	-	-	0.395 (20/56)
7	26310841	C	T	Gm44963	ENSMUST00000206226.1	n.-3555G>A		upstream_gene_variant	1	-	-	-	-	-	-	-	-	-	0.395 (20/56)
7	26558229	G	T	Nlrp9a	ENSMUST00000108387.8	c.1271G>T	p.Trp424Leu	missense_variant	1	-	-	-	-	-	-	-	-	-	0.293 (41/146)
7	26835497	A	C	Cyp2a5	ENSMUST00000005685.14	c.134A>C	p.Asn45Thr	missense_variant	1	-	-	-	-	-	-	-	-	-	0.362 (26/74)
7	26836774	G	A	Cyp2a5	ENSMUST00000005685.14	c.443G>A	p.Arg148His	missense_variant	1	-	-	-	-	-	-	-	-	-	0.311 (16/51)
7	27227638	C	A	Itpkc	ENSMUST00000003850.7	c.850G>T	p.Asp284Tyr	missense_variant	1	-	-	-	-	-	-	-	-	-	0.28 (24/90)
7	27354367	C	G	Shkbp1	ENSMUST00000003857.6	c.400+5G>C		splice_region_variant&intron_variant	1	-	-	-	-	-	-	-	-	-	0.324 (16/46)
7	27354367	C	G	Gm20479	ENSMUST00000126587.1	c.*320+5G>C		splice_region_variant&intron_variant	1	-	-	-	-	-	-	-	-	-	0.324 (16/46)
7	27354367	C	G	Sptbn4	ENSMUST00000011895.13	c.*2925G>C		downstream_gene_variant	1	-	-	-	-	-	-	-	-	-	0.324 (16/46)
7	27428163	C	T	Gm44924	ENSMUST00000138087.2	n.-4973C>T		upstream_gene_variant	1	-	-	-	-	-	-	-	-	-	0.3 (16/52)
7	27428163	C	T	Sptbn4	ENSMUST00000011895.13	c.590+21G>A		intron_variant	1	-	-	-	-	-	-	-	-	-	0.3 (16/52)
7	27446073	G	T	Blvrb	ENSMUST00000108358.7	c.-2045G>T		upstream_gene_variant	1	-	-	-	-	-	-	-	-	-	0.406 (30/70)
7	27446073	G	T	Sptbn4	ENSMUST00000011895.13	c.-16+390C>A		intron_variant	1	-	-	-	-	-	-	-	-	-	0.406 (30/70)
7	28094865	T	C	Fcgbp	ENSMUST00000076648.7	c.3526-33T>C		intron_variant	1	-	-	-	-	-	-	-	-	-	0.31 (21/68)
7	28137164	G	C	9530053A07Rik	ENSMUST00000059886.11	c.507G>C	p.Leu169Leu	synonymous_variant	1	-	-	-	-	-	-	-	-	-	0.275 (16/57)
7	28142386	G	A	9530053A07Rik	ENSMUST00000059886.11	c.1745G>A	p.Ser582Asn	missense_variant	1	-	-	-	-	-	-	-	-	-	0.313 (28/92)
7	28154762	G	A	9530053A07Rik	ENSMUST00000059886.11	c.5150G>A	p.Gly1717Asp	missense_variant	1	-	-	-	-	-	-	-	-	-	0.349 (18/55)
7	28278761	A	G	Eid2b	ENSMUST00000094651.3	c.*525A>G		3_prime_UTR_variant	1	-	-	-	-	-	-	-	-	-	0.295 (40/131)
7	28290319	T	A	BC089491	ENSMUST00000056589.13	c.755+4A>T		splice_region_variant&intron_variant	1	-	-	-	-	-	-	-	-	-	0.5 (8/16)
7	28290319	T	A	Dll3	ENSMUST00000108315.3	c.*3602A>T		downstream_gene_variant	1	-	-	-	-	-	-	-	-	-	0.5 (8/16)
7	29001868	A	C	Ryr1	ENSMUST00000179893.8	c.*1590T>G		downstream_gene_variant	1	-	-	-	-	-	-	-	-	-	0.333 (17/50)
7	29001868	A	C	Map4k1	ENSMUST00000085835.7	c.2287+30A>C		intron_variant	1	-	-	-	-	-	-	-	-	-	0.333 (17/50)
7	29001870	G	T	Ryr1	ENSMUST00000179893.8	c.*1588C>A		downstream_gene_variant	1	-	-	-	-	-	-	-	-	-	0.333 (17/51)
7	29001870	G	T	Map4k1	ENSMUST00000085835.7	c.2287+32G>T		intron_variant	1	-	-	-	-	-	-	-	-	-	0.333 (17/51)
7	29094094	C	A	Ryr1	ENSMUST00000179893.8	c.3948G>T	p.Leu1316Leu	synonymous_variant	1	-	-	-	-	-	-	-	-	-	0.5 (10/19)
7	29724110	G	T	Catsperg2	ENSMUST00000061193.3	c.327+925C>A		intron_variant	1	-	-	-	-	-	-	-	-	-	0.294 (46/148)
7	29875486	G	C	Zfp420	ENSMUST00000057652.6	c.1130G>C	p.Gly377Ala	missense_variant	1	-	-	-	-	-	-	-	-	-	0.176 (12/66)
7	30255928	C	A	Wdr62	ENSMUST00000108190.7	c.1648G>T	p.Val550Leu	missense_variant&splice_region_variant	1	-	-	-	-	-	-	-	-	-	0.323 (12/37)
7	30298838	A	C	Clip3	ENSMUST00000014065.15	c.708A>C	p.Glu236Asp	missense_variant	1	-	-	-	-	-	-	-	-	-	0.325 (17/50)
7	30463683	G	T	Nphs1	ENSMUST00000006825.8	c.1357+27G>T		intron_variant	1	-	-	-	-	-	-	-	-	-	0.407 (17/35)
7	30463683	G	T	Nphs1os	ENSMUST00000152625.1	n.144-41C>A		intron_variant	1	-	-	-	-	-	-	-	-	-	0.407 (17/35)
7	30493812	G	T	Prodh2	ENSMUST00000058280.12	c.129G>T	p.Val43Val	synonymous_variant	1	-	-	-	-	-	-	-	-	-	0.579 (13/22)
7	30528823	A	T	Arhgap33	ENSMUST00000044338.4	c.1158-25T>A		intron_variant	1	-	-	-	-	-	-	-	-	-	0.333 (9/29)
7	30564281	G	T	U2af1l4	ENSMUST00000043273.15	c.328G>T	p.Val110Leu	missense_variant	1	-	-	-	-	-	-	-	-	-	0.278 (24/85)
7	30564281	G	T	U2af1l4	ENSMUST00000167042.7	c.328G>T	p.Val110Leu	missense_variant	1	-	-	-	-	-	-	-	-	-	0.278 (24/85)
7	30564281	G	T	Lin37	ENSMUST00000043975.10	c.-4806C>A		upstream_gene_variant	1	-	-	-	-	-	-	-	-	-	0.278 (24/85)
7	30564281	G	T	Psenen	ENSMUST00000043898.7	c.-1425C>A		upstream_gene_variant	1	-	-	-	-	-	-	-	-	-	0.278 (24/85)
7	30564281	G	T	Igflr1	ENSMUST00000172251.1	c.-1872G>T		upstream_gene_variant	1	-	-	-	-	-	-	-	-	-	0.278 (24/85)
7	30564281	G	T	Kmt2b	ENSMUST00000006470.13	c.*4880C>A		downstream_gene_variant	1	-	-	-	-	-	-	-	-	-	0.278 (24/85)
7	30577369	C	A	Kmt2b	ENSMUST00000006470.13	c.5022G>T	p.Arg1674Arg	synonymous_variant	1	-	-	-	-	-	-	-	-	-	0.385 (11/33)
7	30577370	C	A	Kmt2b	ENSMUST00000006470.13	c.5021G>T	p.Arg1674Leu	missense_variant	1	-	-	-	-	-	-	-	-	-	0.346 (12/33)
7	30776497	G	T	Dmkn	ENSMUST00000165887.7	c.1335+374G>T		intron_variant	1	-	-	-	-	-	-	-	-	-	0.276 (10/35)
7	30867963	T	G	Cd22	ENSMUST00000019248.12	c.2195A>C	p.Lys732Thr	missense_variant&splice_region_variant	1	-	-	-	-	-	-	-	-	-	0.279 (17/57)
7	30867963	T	G	Gm29439	ENSMUST00000189996.1	n.-4770T>G		upstream_gene_variant	1	-	-	-	-	-	-	-	-	-	0.279 (17/57)
7	31072185	A	T	Fxyd3	ENSMUST00000167369.7	c.69T>A	p.Pro23Pro	synonymous_variant	1	-	-	-	-	-	-	-	-	-	0.304 (34/102)
7	31072185	A	T	Lgi4	ENSMUST00000039775.8	c.*2994A>T		downstream_gene_variant	1	-	-	-	-	-	-	-	-	-	0.304 (34/102)
7	31109083	T	C	Hpn	ENSMUST00000039435.14	c.202+8A>G		splice_region_variant&intron_variant	1	-	-	-	-	-	-	-	-	-	0.368 (17/43)
7	35200330	T	A	Slc7a10	ENSMUST00000001854.11	c.1336T>A	p.Phe446Ile	missense_variant	1	-	-	-	-	-	-	-	-	-	0.241 (18/67)
7	35200330	T	A	Lrp3	ENSMUST00000122409.7	c.*1752A>T		downstream_gene_variant&intragenic_variant	1	-	-	-	-	-	-	-	-	-	0.241 (18/67)
7	35310485	C	A	Gpatch1	ENSMUST00000079693.11	c.163G>T	p.Gly55Cys	missense_variant	1	-	-	-	-	-	-	-	-	-	0.412 (16/44)
7	35504219	A	G	Tdrd12	ENSMUST00000193633.5	c.879T>C	p.Ser293Ser	synonymous_variant	1	-	-	-	-	-	-	-	-	-	0.404 (49/122)
7	35504219	A	G	Gm18558	ENSMUST00000186253.1	n.-4502T>C		upstream_gene_variant	1	-	-	-	-	-	-	-	-	-	0.404 (49/122)
7	35547912	C	A	Nudt19	ENSMUST00000040962.5	c.1071G>T	p.Leu357Leu	synonymous_variant	1	-	-	-	-	-	-	-	-	-	0.095 (11/115)
7	38520007	C	A	Gm5591	ENSMUST00000079759.5	c.1441G>T	p.Ala481Ser	missense_variant	1	-	-	-	-	-	-	-	-	-	0.462 (33/71)
7	38520007	C	A	Gm29087	ENSMUST00000186462.1	n.290-8811C>A		intron_variant	1	-	-	-	-	-	-	-	-	-	0.462 (33/71)
7	38522668	G	C	Gm5591	ENSMUST00000079759.5	c.8-32C>G		intron_variant	1	-	-	-	-	-	-	-	-	-	0.354 (18/54)
7	38522668	G	C	Gm29087	ENSMUST00000186462.1	n.290-6150G>C		intron_variant	1	-	-	-	-	-	-	-	-	-	0.354 (18/54)
7	38528104	C	A	Gm5591	ENSMUST00000079759.5	c.-43G>T		5_prime_UTR_variant	1	-	-	-	-	-	-	-	-	-	0.417 (52/137)
7	38528104	C	A	Gm29087	ENSMUST00000186462.1	n.290-714C>A		intron_variant	1	-	-	-	-	-	-	-	-	-	0.417 (52/137)
7	39411430	G	A	Gm5114	ENSMUST00000108017.1	c.8-14C>T		intron_variant	1	-	-	-	-	-	-	-	-	-	0.093 (11/116)
7	41286317	C	G	Gm5592	ENSMUST00000097044.2	c.242C>G	p.Thr81Arg	missense_variant	1	-	-	-	-	-	-	-	-	-	0.402 (41/101)
7	41286317	C	G	Gm44748	ENSMUST00000206040.1	n.-2097G>C		upstream_gene_variant	1	-	-	-	-	-	-	-	-	-	0.402 (41/101)
7	41286319	G	A	Gm5592	ENSMUST00000097044.2	c.244G>A	p.Glu82Lys	missense_variant	1	-	-	-	-	-	-	-	-	-	0.398 (42/99)
7	41286319	G	A	Gm44748	ENSMUST00000206040.1	n.-2099C>T		upstream_gene_variant	1	-	-	-	-	-	-	-	-	-	0.398 (42/99)
7	41288681	C	A	Gm5592	ENSMUST00000097044.2	c.1386C>A	p.Asp462Glu	missense_variant	1	-	-	-	-	-	-	-	-	-	0.352 (23/68)
7	41288681	C	A	Gm44748	ENSMUST00000206040.1	n.-4461G>T		upstream_gene_variant	1	-	-	-	-	-	-	-	-	-	0.352 (23/68)
7	41400498	A	C	Vmn2r57	ENSMUST00000165029.1	c.1826T>G	p.Val609Gly	missense_variant	1	-	-	-	-	-	-	-	-	-	0.287 (59/226)
7	41400498	A	C	Gm20449	ENSMUST00000094532.3	c.*2486T>G		3_prime_UTR_variant	1	-	-	-	-	-	-	-	-	-	0.287 (59/226)
7	41400498	A	C	Gm17102	ENSMUST00000170929.1	n.*3051A>C		downstream_gene_variant	1	-	-	-	-	-	-	-	-	-	0.287 (59/226)
7	41837052	C	A	Vmn2r58	ENSMUST00000171671.1	c.2418G>T	p.Gly806Gly	synonymous_variant	1	-	-	-	-	-	-	-	-	-	0.064 (8/123)
7	41864365	T	C	Vmn2r58	ENSMUST00000171671.1	c.853A>G	p.Met285Val	missense_variant	1	-	-	-	-	-	-	-	-	-	0.295 (81/267)
7	42042517	T	A	Vmn2r59	ENSMUST00000168489.1	c.1555A>T	p.Ser519Cys	missense_variant	1	-	-	-	-	-	-	-	-	-	0.282 (31/116)
7	42106275	C	T	Gm5593	ENSMUST00000155338.1	n.911G>A		non_coding_transcript_exon_variant	1	-	-	-	-	-	-	-	-	-	0.427 (48/108)
7	42260161	G	A	Vmn2r61	ENSMUST00000166131.1	c.109G>A	p.Asp37Asn	missense_variant	1	-	-	-	-	-	-	-	-	-	0.306 (30/103)
7	42260161	G	A	Gm44519	ENSMUST00000206486.1	n.-3745C>T		upstream_gene_variant	1	-	-	-	-	-	-	-	-	-	0.306 (30/103)
7	42266742	A	T	Vmn2r61	ENSMUST00000166131.1	c.778A>T	p.Asn260Tyr	missense_variant	1	-	-	-	-	-	-	-	-	-	0.337 (64/198)
7	42927051	A	G	Vmn2r63	ENSMUST00000163803.1	c.1337T>C	p.Leu446Pro	missense_variant	1	-	-	-	-	-	-	-	-	-	0.217 (17/76)
7	43803725	C	A	Klk8	ENSMUST00000085461.3	c.739C>A	p.Arg247Ser	missense_variant	1	-	-	-	-	-	-	-	-	-	0.382 (16/44)
7	44221699	G	T	Klk1	ENSMUST00000075162.4	c.-3780G>T		upstream_gene_variant	1	-	-	-	-	-	-	-	-	-	0.267 (10/36)
7	44221699	G	T	Klk1b5	ENSMUST00000074359.3	c.*1045G>T		downstream_gene_variant	1	-	-	-	-	-	-	-	-	-	0.267 (10/36)
7	44221699	G	T	Gm10109	ENSMUST00000206890.1	n.531C>A		non_coding_transcript_exon_variant	1	-	-	-	-	-	-	-	-	-	0.267 (10/36)
7	44608515	G	T	Myh14	ENSMUST00000207775.1	c.5695C>A	p.Arg1899Ser	missense_variant	1	-	-	-	-	-	-	-	-	-	0.381 (10/24)
7	44608515	G	T	Kcnc3	ENSMUST00000107906.5	c.*6510G>T		downstream_gene_variant	1	-	-	-	-	-	-	-	-	-	0.381 (10/24)
7	44633014	G	C	Myh14	ENSMUST00000207775.1	c.2343-10C>G		intron_variant	1	-	-	-	-	-	-	-	-	-	0.318 (18/56)
7	44638309	A	G	Myh14	ENSMUST00000207775.1	c.1775T>C	p.Val592Ala	missense_variant	1	-	-	-	-	-	-	-	-	-	0.238 (8/28)
7	45052856	C	G	Prr12	ENSMUST00000057293.7	c.26G>C	p.Gly9Ala	missense_variant	1	-	-	-	-	-	-	-	-	-	0.364 (9/23)
7	45052856	C	G	Prrg2	ENSMUST00000007981.8	c.*1323G>C		downstream_gene_variant	1	-	-	-	-	-	-	-	-	-	0.364 (9/23)
7	45217238	G	T	Tead2	ENSMUST00000033060.13	c.20G>T	p.Gly7Val	missense_variant	1	-	-	-	-	-	-	-	-	-	0.304 (19/57)
7	45585230	G	A	Bcat2	ENSMUST00000033098.15	c.534G>A	p.Glu178Glu	splice_region_variant&synonymous_variant	1	-	-	-	-	-	-	-	-	-	0.297 (12/43)
7	45992306	A	T	Abcc6	ENSMUST00000002850.7	c.2645+2T>A		splice_donor_variant&intron_variant	1	-	-	-	-	-	-	-	-	-	0.368 (17/46)
7	46016330	C	G	Abcc6	ENSMUST00000002850.7	c.812+53G>C		intron_variant	1	-	-	-	-	-	-	-	-	-	0.348 (9/25)
7	46204085	A	G	RP23-64O4.4	ENSMUST00000211426.1	n.-464A>G		upstream_gene_variant	1	-	-	-	-	-	-	-	-	-	0.302 (20/65)
7	46204085	A	G	Ush1c	ENSMUST00000009667.11	c.2184+45T>C		intron_variant	1	-	-	-	-	-	-	-	-	-	0.302 (20/65)
7	46943876	C	T	Uevld	ENSMUST00000094398.12	c.627G>A	p.Lys209Lys	synonymous_variant	1	-	-	-	-	-	-	-	-	-	0.38 (46/120)
7	46983720	T	C	Gm9999	ENSMUST00000070660.10	c.-30T>C		5_prime_UTR_variant	1	-	-	-	-	-	-	-	-	-	0.072 (8/120)
7	47086122	T	A	Ptpn5	ENSMUST00000033142.12	c.847A>T	p.Ile283Phe	missense_variant	1	-	-	-	-	-	-	-	-	-	0.27 (11/45)
7	47086122	T	A	Mir7056	ENSMUST00000183776.1	n.-2898A>T		upstream_gene_variant	1	-	-	-	-	-	-	-	-	-	0.27 (11/45)
7	47464740	G	T	Mrgpra2b	ENSMUST00000119798.2	c.243C>A	p.Ala81Ala	synonymous_variant	1	-	-	-	-	-	-	-	-	-	0.333 (8/24)
7	48482342	A	C	Mrgprx2	ENSMUST00000098433.4	c.727T>G	p.Phe243Val	missense_variant	1	-	-	-	-	-	-	-	-	-	0.347 (26/82)
7	51574703	T	A	Ano5	ENSMUST00000043944.5	c.1406T>A	p.Val469Glu	missense_variant	1	-	-	-	-	-	-	-	-	-	0.317 (19/53)
7	56097533	G	A	Herc2	ENSMUST00000076226.12	c.1417G>A	p.Val473Ile	missense_variant	1	-	-	-	-	-	-	-	-	-	0.235 (21/92)
7	56132498	G	T	Herc2	ENSMUST00000076226.12	c.3932G>T	p.Gly1311Val	missense_variant	1	-	-	-	-	-	-	-	-	-	0.409 (34/82)
7	56293707	A	G	Oca2	ENSMUST00000032633.11	c.635-8A>G		splice_region_variant&intron_variant	1	-	-	-	-	-	-	-	-	-	0.381 (9/25)
7	57824708	A	T	Gabrb3	ENSMUST00000085240.10	c.1437A>T	p.Pro479Pro	synonymous_variant	1	-	-	-	-	-	-	-	-	-	0.304 (24/75)
[truncated: 4,030 more rows]

## Sheet: Sheet1
CHROM	POS	REF	ALT	GENE	BASE PAIR CHANGE	AMINO ACID CHANGE	EFFECT	Mc38
19	40153554	C	T	Cyp2c70	c.*22G>A		3_prime_UTR_variant	1.0 (35/35)
X	161779178	G	T	Rai2	c.*36G>T		3_prime_UTR_variant	1.0 (15/15)
11	66926673	G	T	Pirt	c.*401G>T		3_prime_UTR_variant	0.697 (51/76)
7	127602673	G	T	Rnf40	c.*30G>T		3_prime_UTR_variant	0.6 (14/23)
2	57108111	AT	A	Nr4a2	c.*44delA		3_prime_UTR_variant	0.568 (23/40)
19	60757174	T	G	Nanos1	c.*105T>G		3_prime_UTR_variant	0.556 (18/31)
4	132580632	A	G	Ptafr	c.*306A>G		3_prime_UTR_variant	0.548 (54/97)
X	9063775	G	T	Fthl17f	c.*78G>T		3_prime_UTR_variant	0.54 (65/127)
6	8582674	A	T	Gm45062	c.*564A>T		3_prime_UTR_variant	0.533 (40/72)
9	59972380	C	T	Thsd4	c.*16G>A		3_prime_UTR_variant	0.519 (16/31)
5	121854089	G	T	Fam109a	c.*712G>T		3_prime_UTR_variant	0.511 (25/52)
4	134245282	C	T	E130218I03Rik	c.*408C>T		3_prime_UTR_variant	0.5 (9/19)
3	92456794	A	AG	Sprr3	c.*24dupC		3_prime_UTR_variant	0.492 (42/83)
5	113244993	G	T	Sgsm1	c.*12C>A		3_prime_UTR_variant	0.475 (26/52)
X	21487360	A	G	Agtr2	c.*140A>G		3_prime_UTR_variant	0.473 (41/88)
14	121953986	G	T	Gpr183	c.*48C>A		3_prime_UTR_variant	0.455 (11/25)
11	46670897	A	T	Timd2	c.*1T>A		3_prime_UTR_variant	0.444 (21/48)
11	95963495	C	A	Igf2bp1	c.*5G>T		3_prime_UTR_variant	0.444 (11/23)
3	32726543	A	C	Mrpl47	c.*1051T>G		3_prime_UTR_variant	0.431 (37/90)
6	4757877	G	T	Peg10	c.*637G>T		3_prime_UTR_variant	0.429 (40/91)
9	111275451	G	C	Epm2aip1	c.*1670G>C		3_prime_UTR_variant	0.426 (30/70)
11	103070817	G	A	Plcd3	c.*24C>T		3_prime_UTR_variant	0.422 (21/49)
10	60403485	C	A	Gm17455	c.*141C>A		3_prime_UTR_variant	0.413 (24/56)
16	36042896	T	C	Wdr5b	c.*397T>C		3_prime_UTR_variant	0.411 (69/176)
8	40756151	G	A	Adam25	c.*170G>A		3_prime_UTR_variant	0.408 (51/130)
9	98904537	AT	A	7420426K07Rik	c.*701delT		3_prime_UTR_variant	0.393 (13/33)
3	152458443	G	T	Zzz3	c.*45G>T		3_prime_UTR_variant	0.391 (20/51)
7	18988383	C	A	Nanos2	c.*368C>A		3_prime_UTR_variant	0.39 (27/69)
7	18988382	C	A	Nanos2	c.*367C>A		3_prime_UTR_variant	0.39 (27/68)
X	71940809	G	T	Gm1141	c.*474G>T		3_prime_UTR_variant	0.38 (21/58)
X	23907540	A	T	Gm4907	c.*43A>T		3_prime_UTR_variant	0.375 (10/29)
10	60368946	T	A	Vsir	c.*7T>A		3_prime_UTR_variant	0.37 (13/35)
14	76134963	G	T	Nufip1	c.*61G>T		3_prime_UTR_variant	0.367 (41/112)
1	39371269	G	A	Rpl31	c.*159G>A		3_prime_UTR_variant	0.361 (34/86)
X	59063513	C	G	Fgf13	c.*20G>C		3_prime_UTR_variant	0.357 (18/50)
16	20231826	G	T	Yeats2	c.*953G>T		3_prime_UTR_variant	0.355 (14/41)
16	11073668	T	G	Snn	c.*1083T>G		3_prime_UTR_variant	0.348 (16/52)
13	51150693	G	A	Spin1	c.*1532G>A		3_prime_UTR_variant	0.344 (13/37)
7	121076351	A	C	Mettl9	c.*16A>C		3_prime_UTR_variant	0.343 (15/42)
7	102711033	T	G	Olfr558	c.*819T>G		3_prime_UTR_variant	0.336 (48/135)
2	24421407	C	A	Pax8	c.*141G>T		3_prime_UTR_variant	0.333 (8/24)
16	19770410	T	G	B3gnt5	c.*247T>G		3_prime_UTR_variant	0.329 (30/87)
12	32379866	C	T	Ccdc71l	c.*226C>T		3_prime_UTR_variant	0.323 (14/37)
9	74281750	C	A	Wdr72	c.*27C>A		3_prime_UTR_variant	0.322 (20/66)
13	74363789	C	T	Ccdc127	c.*6672C>T		3_prime_UTR_variant	0.32 (9/29)
12	111682901	G	T	Trmt61a	c.*32G>T		3_prime_UTR_variant	0.318 (9/26)
10	19358424	C	A	Olig3	c.*974C>A		3_prime_UTR_variant	0.317 (15/52)
2	80294041	C	T	Prdx6b	c.*518C>T		3_prime_UTR_variant	0.316 (22/66)
13	23752854	A	G	Hist1h3b	c.*64A>G		3_prime_UTR_variant	0.315 (19/62)
4	43427171	G	T	Fam166b	c.*12C>A		3_prime_UTR_variant	0.314 (15/46)
3	96247566	A	C	Hist2h3c1	c.*270A>C		3_prime_UTR_variant	0.311 (30/100)
19	13769343	C	G	Olfr1495	c.*40C>G		3_prime_UTR_variant	0.31 (23/76)
1	132939409	C	G	Lrrn2	c.*18C>G		3_prime_UTR_variant	0.308 (14/47)
4	43427172	A	G	Fam166b	c.*11T>C		3_prime_UTR_variant	0.306 (15/45)
9	99479829	C	A	Armc8	c.*915G>T		3_prime_UTR_variant	0.303 (11/41)
5	73635302	T	G	Sgcb	c.*193A>C		3_prime_UTR_variant	0.303 (11/39)
9	51623770	C	A	Gm7293	c.*16C>A		3_prime_UTR_variant	0.299 (44/152)
1	80199883	GA	G	Fam124b	c.*26delT		3_prime_UTR_variant	0.298 (14/54)
7	28278761	A	G	Eid2b	c.*525A>G		3_prime_UTR_variant	0.295 (40/131)
2	68119608	GT	G	B3galt1	c.*695delT		3_prime_UTR_variant	0.288 (23/82)
7	41400498	A	C	Gm20449	c.*2486T>G		3_prime_UTR_variant	0.287 (59/226)
10	93970177	C	T	Vezt	c.*16G>A		3_prime_UTR_variant	0.286 (45/155)
15	96572386	A	C	Slc38a1	c.*4325T>G		3_prime_UTR_variant	0.286 (37/130)
13	40707042	C	A	Gm9979	c.*1219C>A		3_prime_UTR_variant	0.286 (12/41)
18	61697303	T	A	Pcyox1l	c.*9A>T		3_prime_UTR_variant	0.286 (10/36)
3	107439387	T	G	Kcnc4	c.*34A>C		3_prime_UTR_variant	0.28 (8/30)
3	68871308	A	C	1110032F04Rik	c.*857A>C		3_prime_UTR_variant	0.278 (18/64)
2	112156920	A	T	Olfr1318	c.*5A>T		3_prime_UTR_variant	0.276 (9/33)
9	113918092	G	T	Clasp2	c.*11G>T		3_prime_UTR_variant	0.269 (16/57)
7	18345816	C	A	Psg18	c.*28G>T		3_prime_UTR_variant	0.267 (31/112)
9	124125591	G	T	Ccr5	c.*165G>T		3_prime_UTR_variant	0.264 (15/65)
9	103250573	G	A	1300017J02Rik	c.*55C>T		3_prime_UTR_variant	0.259 (9/31)
14	113316089	G	T	Tpm3-rs7	c.*667G>T		3_prime_UTR_variant	0.257 (11/40)
2	68119773	A	T	B3galt1	c.*850A>T		3_prime_UTR_variant	0.256 (23/91)
5	24863828	C	T	Prkag2	c.*28G>A		3_prime_UTR_variant	0.253 (22/88)
6	38115748	G	A	Tmem213	c.*30G>A		3_prime_UTR_variant	0.25 (8/34)
16	33497369	A	G	Zfp148	c.*25A>G		3_prime_UTR_variant	0.25 (13/52)
1	82235137	T	G	Irs1	c.*2489A>C		3_prime_UTR_variant	0.247 (22/94)
1	82235137	T	G	Gm9747	c.*741T>G		3_prime_UTR_variant	0.247 (22/94)
3	92409171	G	T	Sprr2i	c.*225G>T		3_prime_UTR_variant	0.246 (15/65)
12	110280669	G	A	Dio3	c.*523G>A		3_prime_UTR_variant	0.24 (8/33)
1	83118756	C	A	Ccl20	c.*640C>A		3_prime_UTR_variant	0.236 (29/126)
11	83525974	A	T	Ccl5	c.*3T>A		3_prime_UTR_variant	0.233 (27/127)
13	51421348	AT	A	S1pr3	c.*1436delT		3_prime_UTR_variant	0.232 (14/65)
4	116990263	G	C	Urod	c.*24C>G		3_prime_UTR_variant	0.226 (15/75)
1	83210526	C	T	Daw1	c.*337C>T		3_prime_UTR_variant	0.22 (16/72)
3	107106479	C	G	Kcna2	c.*875C>G		3_prime_UTR_variant	0.208 (11/54)
2	127365907	T	G	Adra2b	c.*981T>G		3_prime_UTR_variant	0.176 (10/56)
5	52368988	G	A	Sod3	c.*272G>A		3_prime_UTR_variant	0.175 (12/50)
3	151543320	C	T	Adgrl4	c.*24C>T		3_prime_UTR_variant	0.172 (22/114)
3	18057333	G	T	Bhlhe22	c.*1478G>T		3_prime_UTR_variant	0.143 (13/71)
17	78493275	A	C	Gm10093	c.*245A>C		3_prime_UTR_variant	0.137 (10/66)
2	153686425	G	T	Dnmt3b	c.*26G>T		3_prime_UTR_variant	0.129 (14/104)
2	168184332	T	A	Gm20716	c.*1148A>T		3_prime_UTR_variant	0.107 (21/205)
2	156077644	C	A	Gm28036	c.*958G>T		3_prime_UTR_variant	0.106 (8/75)
3	92255376	A	C	Sprr2a2	c.*1220A>C		3_prime_UTR_variant	0.052 (10/192)
11	80428648	G	T	Psmd11	c.-17G>T		5_prime_UTR_premature_start_codon_gain_variant&5_prime_UTR_variant	0.769 (25/32)
4	119422877	G	T	Zmynd12	c.-9G>T		5_prime_UTR_premature_start_codon_gain_variant&5_prime_UTR_variant	0.588 (13/20)
4	139967797	G	T	Klhdc7a	c.-163C>A		5_prime_UTR_premature_start_codon_gain_variant&5_prime_UTR_variant	0.514 (18/38)
16	4624906	C	A	Pam16	c.-53G>T		5_prime_UTR_premature_start_codon_gain_variant&5_prime_UTR_variant	0.421 (9/22)
4	95051378	T	A	Jun	c.-107A>T		5_prime_UTR_premature_start_codon_gain_variant&5_prime_UTR_variant	0.372 (19/46)
19	6080121	T	C	Tmem262	c.-22T>C		5_prime_UTR_premature_start_codon_gain_variant&5_prime_UTR_variant	0.361 (16/42)
11	68520200	G	A	Pik3r6	c.-75G>A		5_prime_UTR_premature_start_codon_gain_variant&5_prime_UTR_variant	0.327 (17/58)
5	124579175	G	T	Gtf2h3	c.-14G>T		5_prime_UTR_premature_start_codon_gain_variant&5_prime_UTR_variant	0.3 (23/76)
13	50467393	T	G	Nutm2	c.-8T>G		5_prime_UTR_premature_start_codon_gain_variant&5_prime_UTR_variant	0.29 (40/142)
1	17728613	C	A	Crispld1	c.-44C>A		5_prime_UTR_premature_start_codon_gain_variant&5_prime_UTR_variant	0.25 (10/38)
18	36695824	T	A	E230025N22Rik	c.-63A>T		5_prime_UTR_premature_start_codon_gain_variant&5_prime_UTR_variant	0.206 (9/39)
6	70074586	T	A	Igkv6-32	c.-2A>T		5_prime_UTR_premature_start_codon_gain_variant&5_prime_UTR_variant	0.133 (15/121)
11	72266569	G	T	Slc13a5	c.-4C>A		5_prime_UTR_variant	0.875 (33/38)
17	21011750	A	AT	Zfp160	c.-8_-7insT		5_prime_UTR_variant	0.712 (54/74)
11	117849317	G	T	Birc5	c.-34G>T		5_prime_UTR_variant	0.708 (18/26)
19	6335052	G	C	Men1	c.-17G>C		5_prime_UTR_variant	0.627 (41/65)
8	70318318	C	G	Cers1	c.-1078C>G		5_prime_UTR_variant	0.57 (92/158)
11	58868973	G	T	2810021J22Rik	c.-19G>T		5_prime_UTR_variant	0.569 (52/91)
6	56789392	T	A	Kbtbd2	c.-4A>T		5_prime_UTR_variant	0.548 (73/141)
12	101083460	C	G	Smek1	c.-590G>C		5_prime_UTR_variant	0.545 (9/16)
14	55660383	C	G	Mdp1	c.-9G>C		5_prime_UTR_variant	0.5 (18/40)
X	42502699	G	T	Sh2d1a	c.-24G>T		5_prime_UTR_variant	0.471 (22/45)
X	42502697	T	C	Sh2d1a	c.-26T>C		5_prime_UTR_variant	0.471 (22/44)
7	38528104	C	A	Gm5591	c.-43G>T		5_prime_UTR_variant	0.417 (52/137)
3	108571708	G	C	Taf13	c.-14G>C		5_prime_UTR_variant	0.414 (18/42)
12	31634359	T	C	Bcap29	c.-5A>G		5_prime_UTR_variant	0.391 (19/55)
10	39925142	C	T	Mfsd4b2	c.-24G>A		5_prime_UTR_variant	0.367 (19/45)
2	75981785	C	T	Ttc30a1	c.-48G>A		5_prime_UTR_variant	0.364 (25/69)
19	5106959	C	A	Rab1b	c.-21G>T		5_prime_UTR_variant	0.364 (13/38)
10	129775865	T	A	Olfr809	c.-51T>A		5_prime_UTR_variant	0.35 (30/89)
12	102704827	C	G	Itpk1	c.-11G>C		5_prime_UTR_variant	0.348 (10/31)
13	76056902	C	T	Gpr150	c.-78G>A		5_prime_UTR_variant	0.333 (21/70)
10	81523974	A	C	Gna15	c.-20T>G		5_prime_UTR_variant	0.333 (10/29)
1	172698090	G	T	Crp	c.-47G>T		5_prime_UTR_variant	0.324 (12/39)
10	78715873	A	G	Casp14	c.-15T>C		5_prime_UTR_variant	0.319 (32/108)
13	55593167	G	A	Tmed9	c.-7G>A		5_prime_UTR_variant	0.3 (10/33)
11	116434283	T	G	Ubald2	c.-26T>G		5_prime_UTR_variant	0.295 (19/63)
7	104164812	C	A	Olfm5	c.-7G>T		5_prime_UTR_variant	0.289 (14/47)
1	24177783	T	G	Col9a1	c.-72T>G		5_prime_UTR_variant	0.286 (9/32)
6	123229947	A	C	Clec4n	c.-72A>C		5_prime_UTR_variant	0.279 (17/55)
4	147682327	T	A	Zfp534	c.-31A>T		5_prime_UTR_variant	0.27 (10/37)
1	74158335	A	C	Cxcr2	c.-14A>C		5_prime_UTR_variant	0.263 (26/100)
1	156366047	C	A	Gm2000	c.-31C>A		5_prime_UTR_variant	0.254 (15/63)
11	101078413	G	C	Hsd17b1	c.-29G>C		5_prime_UTR_variant	0.247 (24/108)
16	30267482	A	C	Cpn2	c.-29T>G		5_prime_UTR_variant	0.233 (12/51)
2	170601186	C	T	4930470P17Rik	c.-23G>A		5_prime_UTR_variant	0.229 (13/60)
1	32547125	C	G	Gm5415	c.-298G>C		5_prime_UTR_variant	0.196 (9/46)
13	84222317	C	G	Tmem161b	c.-115C>G		5_prime_UTR_variant	0.195 (9/50)
8	121590585	G	A	Map1lc3b	c.-1G>A		5_prime_UTR_variant	0.189 (10/50)
1	32546865	G	T	Gm5415	c.-38C>A		5_prime_UTR_variant	0.183 (31/163)
2	26935299	C	A	Stkld1	c.-24C>A		5_prime_UTR_variant	0.183 (15/75)
1	31222925	T	C	Pih1d3	c.-14T>C		5_prime_UTR_variant	0.179 (13/68)
11	82115223	T	C	Ccl8	c.-14T>C		5_prime_UTR_variant	0.146 (8/61)
2	65363939	C	A	Slc38a11	c.-20G>T		5_prime_UTR_variant	0.143 (10/62)
11	73688950	A	C	Zfp735	c.-7A>C		5_prime_UTR_variant	0.118 (18/144)
7	46983720	T	C	Gm9999	c.-30T>C		5_prime_UTR_variant	0.072 (8/120)
5	149050629	TGACAGAAGCATCCGGGTGCTTCTTCTTGTGCTCCTCCCGGCAAGTTTGCACAAA	T	Hmgb1	c.55_108delTTTGTGCAAACTTGCCGGGAGGAGCACAAGAAGAAGCACCCGGATGCTTCTGTC	p.Phe19_Val36del	conservative_inframe_deletion	0.116 (32/278)
5	150457801	G	GTCA	Fry	c.7329_7331dupATC	p.Ser2444dup	disruptive_inframe_insertion	0.154 (14/97)
19	37687104	G	C	Exoc6	c.*4126G>C		downstream_gene_variant	1.0 (13/13)
4	141622163	C	A	Plekhm2	c.*4407G>T		downstream_gene_variant	0.833 (18/21)
11	75166268	C	T	Smg6	c.*3318C>T		downstream_gene_variant	0.829 (35/41)
15	47696626	C	A	Gm16300	n.*3083G>T		downstream_gene_variant	0.824 (30/36)
11	73181174	G	T	Ctns	c.*3744C>A		downstream_gene_variant	0.818 (10/12)
11	100260923	T	G	Krt42	c.*2147A>C		downstream_gene_variant	0.813 (16/20)
19	10193704	T	A	Mir6993	n.*2265T>A		downstream_gene_variant	0.806 (29/35)
11	101770590	C	T	Dhx8	c.*3731C>T		downstream_gene_variant	0.8 (9/12)
11	96934763	G	A	Pnpo	c.*4152C>T		downstream_gene_variant	0.791 (42/54)
19	8678379	G	T	Gm22820	n.*3456C>A		downstream_gene_variant	0.775 (66/83)
4	9430002	C	A	Gm11817	n.*1959G>T		downstream_gene_variant	0.767 (29/38)
11	114668875	CG	C	Gm11689	n.*3967delG		downstream_gene_variant	0.766 (59/79)
12	111423720	G	T	Gm10425	n.*3154C>A		downstream_gene_variant	0.75 (14/18)
11	101326420	G	T	Psme3	c.*4548G>T		downstream_gene_variant	0.738 (51/72)
8	24715137	AT	A	RP24-281G1.2	n.*588delT		downstream_gene_variant	0.726 (82/109)
16	11147254	C	A	Gm23935	n.*3073C>A		downstream_gene_variant	0.714 (10/14)
8	71688093	C	A	B3gnt3	c.*4511G>T		downstream_gene_variant	0.711 (35/47)
11	80157041	G	A	Adap2os	n.*1820C>T		downstream_gene_variant	0.71 (81/117)
11	80157039	A	T	Adap2os	n.*1822T>A		downstream_gene_variant	0.707 (82/119)
11	67207388	C	A	Gm12300	n.*3868G>T		downstream_gene_variant	0.706 (67/96)
11	120276609	G	T	AL928567.1	n.*1985G>T		downstream_gene_variant	0.704 (22/30)
11	114789829	C	A	Btbd17	c.*1619G>T		downstream_gene_variant	0.703 (29/41)
4	43445822	A	T	Cd72	c.*2443T>A		downstream_gene_variant	0.702 (40/57)
11	97688369	C	A	Pcgf2	c.*1618G>T		downstream_gene_variant	0.682 (16/23)
11	97688369	C	A	Mllt6	c.*6782C>A		downstream_gene_variant	0.682 (16/23)
11	96195039	G	T	Gm27898	n.*4712C>A		downstream_gene_variant	0.667 (21/33)
11	115887925	A	T	Recql5	c.*5133T>A		downstream_gene_variant	0.661 (57/81)
11	120614373	C	G	Sirt7	c.*4475G>C		downstream_gene_variant	0.653 (39/58)
16	36961492	G	T	Fbxo40	c.*4581C>A		downstream_gene_variant	0.65 (31/46)
11	116006520	G	A	Galk1	c.*2123C>T		downstream_gene_variant	0.647 (38/57)
4	133486681	C	A	Trnp1	c.*11105G>T		downstream_gene_variant	0.64 (19/29)
4	133486682	G	T	Trnp1	c.*11104C>A		downstream_gene_variant	0.64 (19/29)
4	46542225	C	A	Gm16731	n.*2423C>A		downstream_gene_variant	0.634 (32/51)
4	43650720	A	T	Spag8	c.*740T>A		downstream_gene_variant	0.633 (46/74)
4	43650720	A	T	Hint2	c.*3600T>A		downstream_gene_variant	0.633 (46/74)
8	111689409	G	T	Mir7076	n.*192C>A		downstream_gene_variant	0.629 (24/38)
4	119132090	A	T	Gm12868	n.*1659T>A		downstream_gene_variant	0.625 (10/16)
4	119132090	A	T	Mir1957a	n.*2246A>T		downstream_gene_variant	0.625 (10/16)
6	119312450	G	T	Lrtm2	c.*4606C>A		downstream_gene_variant	0.619 (18/29)
6	91763510	G	C	Slc6a6	c.*8453G>C		downstream_gene_variant	0.619 (15/24)
4	123295746	G	T	Gm25788	n.*4272G>T		downstream_gene_variant	0.609 (53/84)
4	123295746	G	T	Gm22154	n.*2464G>T		downstream_gene_variant	0.609 (53/84)
11	3135892	C	A	Pisd-ps1	n.*4888C>A		downstream_gene_variant	0.6 (32/52)
11	100759519	G	T	Hcrt	c.*2275C>A		downstream_gene_variant	0.6 (22/38)
7	127602673	G	T	Zfp629	c.*7359C>A		downstream_gene_variant	0.6 (14/23)
7	127602673	G	T	1700120K04Rik	n.*1227C>A		downstream_gene_variant	0.6 (14/23)
11	60202880	C	T	Rai1	c.*4835C>T		downstream_gene_variant	0.6 (12/19)
11	19014317	C	A	Gm16140	n.*3134C>A		downstream_gene_variant	0.6 (10/17)
17	74017662	G	T	Srd5a2	c.*44C>A		downstream_gene_variant	0.594 (70/122)
8	84086210	G	T	Mir709	n.*24G>T		downstream_gene_variant	0.594 (51/88)
4	139347897	C	A	Gm13019	n.*4564C>A		downstream_gene_variant	0.593 (18/32)
6	119312448	A	T	Lrtm2	c.*4608T>A		downstream_gene_variant	0.591 (18/28)
11	77467865	AC	A	Ankrd13b	c.*3740delG		downstream_gene_variant	0.591 (17/31)
11	97518727	C	A	Gm11611	n.*885G>T		downstream_gene_variant	0.591 (16/27)
2	25081785	C	A	Noxa1	c.*3939G>T		downstream_gene_variant	0.591 (13/22)
4	32806229	C	T	Lyrm2	c.*5006C>T		downstream_gene_variant	0.585 (37/67)
17	35664791	C	G	Gtf2h4	c.*3039G>C		downstream_gene_variant	0.583 (17/30)
17	35664791	C	G	Gm20483	n.*4424C>G		downstream_gene_variant	0.583 (17/30)
11	48945834	C	A	9930111J21Rik1	c.*1390G>T		downstream_gene_variant	0.578 (84/145)
11	3537271	C	A	Gm11946	n.*415C>A		downstream_gene_variant	0.576 (39/68)
11	3537271	C	A	Gm11947	n.*2364C>A		downstream_gene_variant	0.576 (39/68)
4	52442255	G	A	Tmc4-ps	n.*1660C>T		downstream_gene_variant	0.575 (29/52)
4	138305073	G	T	Kif17	c.*3646G>T		downstream_gene_variant	0.571 (8/15)
6	125134620	G	T	Chd4	c.*4619G>T		downstream_gene_variant	0.571 (15/25)
11	58868973	G	T	Gm12259	n.*1819G>T		downstream_gene_variant	0.569 (52/91)
4	155715619	G	T	Gm22573	n.*4421C>A		downstream_gene_variant	0.567 (42/69)
4	155715618	T	C	Gm22573	n.*4422A>G		downstream_gene_variant	0.567 (41/68)
4	156048517	C	G	Gm13648	n.*4198G>C		downstream_gene_variant	0.567 (35/62)
8	104291138	T	A	Cmtm1	c.*2472A>T		downstream_gene_variant	0.566 (57/102)
11	6593740	G	T	Nacad	c.*4155C>A		downstream_gene_variant	0.56 (31/54)
19	60757174	T	G	Eif3a	c.*4907A>C		downstream_gene_variant	0.556 (18/31)
3	102934758	T	A	Nr1h5	c.*6112A>T		downstream_gene_variant	0.554 (74/138)
19	4619073	G	T	Rce1	c.*3934C>A		downstream_gene_variant	0.553 (22/40)
19	4619073	G	T	Mir6986	n.*4825C>A		downstream_gene_variant	0.553 (22/40)
1	192137503	C	G	Gm37055	n.*682C>G		downstream_gene_variant	0.55 (14/24)
8	83669383	G	T	Gipc1	c.*5114G>T		downstream_gene_variant	0.548 (26/50)
17	57063609	AT	A	Dennd1c	c.*2501delA		downstream_gene_variant	0.548 (23/39)
11	46536392	C	A	Gm12170	n.*3390G>T		downstream_gene_variant	0.546 (144/265)
3	95007701	G	C	Pi4kb	c.*1761G>C		downstream_gene_variant	0.545 (13/23)
3	95007701	G	C	Mir7013	n.*3462G>C		downstream_gene_variant	0.545 (13/23)
11	58390144	T	C	Gm12251	n.*2625A>G		downstream_gene_variant	0.544 (65/125)
8	124896666	C	T	RP24-77I7.2	n.*1228G>A		downstream_gene_variant	0.542 (37/70)
8	121923499	T	A	BC048644	n.*3809T>A		downstream_gene_variant	0.542 (28/54)
8	104321546	C	A	RP24-217M18.3	n.*2894G>T		downstream_gene_variant	0.541 (82/156)
19	4856306	C	A	Actn3	c.*5039G>T		downstream_gene_variant	0.541 (77/142)
3	98290945	G	A	Gm43189	n.*889G>A		downstream_gene_variant	0.541 (40/74)
X	9063775	G	T	Gm16480	n.*2260C>A		downstream_gene_variant	0.54 (65/127)
4	148944480	C	A	Gm13205	n.*3012G>T		downstream_gene_variant	0.538 (9/15)
17	25860496	C	G	Fam195a	c.*3473G>C		downstream_gene_variant	0.536 (15/30)
6	78372828	G	T	Reg3d	c.*3243C>A		downstream_gene_variant	0.534 (36/70)
6	83056633	G	T	Loxl3	c.*5760G>T		downstream_gene_variant	0.533 (33/64)
17	35065340	C	A	Ddah2	c.*3433C>A		downstream_gene_variant	0.533 (10/17)
8	94505404	C	A	Mir7072	n.*299C>A		downstream_gene_variant	0.532 (29/53)
17	71361841	C	A	Gm37639	n.*4211G>T		downstream_gene_variant	0.528 (54/109)
6	122832936	A	T	Mir7231	n.*1499A>T		downstream_gene_variant	0.528 (47/94)
17	56608837	C	G	Safb	c.*2732C>G		downstream_gene_variant	0.526 (13/22)
3	94389641	G	T	Gm43401	n.*3330C>A		downstream_gene_variant	0.526 (12/22)
17	37279674	A	T	Olfr755-ps1	n.*1569A>T		downstream_gene_variant	0.525 (131/243)
4	156014204	G	T	Sdf4	c.*4254G>T		downstream_gene_variant	0.522 (15/27)
4	156014204	G	T	Gm37090	n.*4352C>A		downstream_gene_variant	0.522 (15/27)
17	34841546	G	C	Dxo	c.*2409G>C		downstream_gene_variant	0.519 (82/152)
17	34841546	G	C	Mir6971	n.*263C>G		downstream_gene_variant	0.519 (82/152)
17	34841546	G	C	Mir6970	n.*3555C>G		downstream_gene_variant	0.519 (82/152)
6	41687572	G	T	1700034O15Rik	c.*2182G>T		downstream_gene_variant	0.519 (54/100)
4	104862686	C	A	Gm17662	c.*3549C>A		downstream_gene_variant	0.518 (51/97)
17	55960732	T	C	Ebi3	c.*3955T>C		downstream_gene_variant	0.516 (81/166)
13	54740397	C	A	Cdhr2	c.*3817C>A		downstream_gene_variant	0.516 (18/34)
X	74571005	G	T	Gm4989	n.*3299G>T		downstream_gene_variant	0.515 (44/83)
17	46405978	T	G	Gm23037	n.*1780T>G		downstream_gene_variant	0.512 (24/47)
4	116991312	C	A	Zswim5	c.*3979C>A		downstream_gene_variant	0.509 (28/60)
3	96666913	C	G	Itga10	c.*3883C>G		downstream_gene_variant	0.508 (196/384)
6	50574021	G	T	Mir6371	n.*1513G>T		downstream_gene_variant	0.507 (93/182)
10	128545569	G	T	Rpl41	c.*2777C>A		downstream_gene_variant	0.5 (9/18)
10	128545569	G	T	Gm29585	n.*210G>T		downstream_gene_variant	0.5 (9/18)
17	85621521	C	A	Gm27275	n.*4548C>A		downstream_gene_variant	0.5 (8/18)
17	85621521	C	A	Gm27502	n.*3256C>A		downstream_gene_variant	0.5 (8/18)
17	85621521	C	A	Gm27427	n.*2104C>A		downstream_gene_variant	0.5 (8/18)
7	28290319	T	A	Dll3	c.*3602A>T		downstream_gene_variant	0.5 (8/16)
19	5466169	G	T	Fibp	c.*1175G>T		downstream_gene_variant	0.5 (47/95)
X	96554922	G	C	Gm14935	n.*4586G>C		downstream_gene_variant	0.5 (39/72)
6	118089521	G	A	Mir7044	n.*4258G>A		downstream_gene_variant	0.5 (25/47)
6	94609026	G	T	Slc25a26	c.*5357G>T		downstream_gene_variant	0.5 (23/43)
19	5708810	C	T	Kcnk7	c.*1794C>T		downstream_gene_variant	0.5 (20/43)
8	24948750	C	A	Adam9	c.*2167G>T		downstream_gene_variant	0.5 (19/37)
4	152119221	G	T	Plekhg5	c.*4382G>T		downstream_gene_variant	0.5 (19/35)
14	55660383	C	G	Nedd8	c.*2146G>C		downstream_gene_variant	0.5 (18/40)
17	55972833	C	A	Ccdc94	c.*5199C>A		downstream_gene_variant	0.5 (16/32)
3	94402239	G	C	Rorc	c.*4886G>C		downstream_gene_variant	0.485 (19/39)
11	58994372	G	T	Trim11	c.*3638G>T		downstream_gene_variant	0.481 (15/30)
6	101151999	T	A	Gm43942	n.*4849T>A		downstream_gene_variant	0.479 (25/56)
17	25368841	T	G	Tpsb2	c.*995T>G		downstream_gene_variant	0.479 (101/208)
17	34819987	C	T	Stk19	c.*4292G>A		downstream_gene_variant	0.478 (26/57)
4	153960665	CG	C	Dffb	c.*4704delC		downstream_gene_variant	0.476 (22/49)
17	35159431	C	T	Gm23442	n.*3132G>A		downstream_gene_variant	0.472 (23/46)
10	80903238	C	G	Tmprss9	c.*3898C>G		downstream_gene_variant	0.471 (8/19)
17	58410362	AT	A	Cntnap5c	c.*21delT		downstream_gene_variant	0.467 (16/34)
11	5639062	A	C	Gm11964	n.*4480A>C		downstream_gene_variant	0.467 (15/35)
8	3618969	C	A	Pcp2	c.*4470G>T		downstream_gene_variant	0.467 (10/19)
8	3618969	C	A	Gm22204	n.*3114C>A		downstream_gene_variant	0.467 (10/19)
3	105986379	C	A	Gm42890	n.*1779C>A		downstream_gene_variant	0.466 (118/257)
4	149654847	TG	T	Mir7023	n.*656delC		downstream_gene_variant	0.465 (56/124)
17	35052459	G	T	Gm23421	n.*3138G>T		downstream_gene_variant	0.465 (24/53)
3	88437193	C	A	Mir7011	n.*3686G>T		downstream_gene_variant	0.463 (28/53)
11	117786409	G	C	Gm11724	n.*3488C>G		downstream_gene_variant	0.462 (8/16)
X	112241313	C	A	Gm45194	c.*723C>A		downstream_gene_variant	0.462 (14/31)
19	56317760	T	C	Nrap	c.*2435A>G		downstream_gene_variant	0.458 (15/28)
11	115587603	T	G	Nup85	c.*3781T>G		downstream_gene_variant	0.458 (12/27)
5	116453419	T	A	Gm42853	n.*2679A>T		downstream_gene_variant	0.457 (20/43)
10	78441188	T	G	Mir6908	n.*3907A>C		downstream_gene_variant	0.45 (48/108)
5	30922017	C	G	Emilin1	c.*1065C>G		downstream_gene_variant	0.45 (11/25)
4	154898989	A	C	Mmel1	c.*3764A>C		downstream_gene_variant	0.444 (9/23)
X	50897280	T	G	Stk26	c.*5956T>G		downstream_gene_variant	0.441 (30/72)
17	24505038	C	A	Traf7	c.*4306G>T		downstream_gene_variant	0.441 (16/37)
3	149336694	G	A	Gm26468	n.*4209C>T		downstream_gene_variant	0.44 (40/94)
17	24426676	G	T	Rnps1	c.*1491G>T		downstream_gene_variant	0.44 (14/31)
4	126520190	C	A	Gm12934	n.*4140G>T		downstream_gene_variant	0.44 (13/32)
4	148674615	G	T	Gm572	c.*3187G>T		downstream_gene_variant	0.44 (11/27)
3	89144855	C	G	Hcn3	c.*2744G>C		downstream_gene_variant	0.439 (22/52)
4	154023653	G	C	Lrrc47	c.*3777G>C		downstream_gene_variant	0.438 (16/35)
4	154023653	G	C	Ccdc27	c.*3081C>G		downstream_gene_variant	0.438 (16/35)
14	31142038	G	T	Nt5dc2	c.*2996G>T		downstream_gene_variant	0.435 (11/25)
11	58995530	A	T	Trim11	c.*4796A>T		downstream_gene_variant	0.433 (30/73)
3	92028085	A	T	Mif-ps3	n.*3174A>T		downstream_gene_variant	0.433 (30/69)
10	79865366	G	T	Ptbp1	c.*2089G>T		downstream_gene_variant	0.433 (14/36)
10	79865366	G	T	Mir6910	n.*2714G>T		downstream_gene_variant	0.433 (14/36)
12	114612240	G	T	Ighv1-11	c.*3C>A		downstream_gene_variant	0.432 (63/145)
12	114612240	G	T	Ighv1-12	c.*3610C>A		downstream_gene_variant	0.432 (63/145)
16	17902310	C	T	Tssk1	c.*6860C>T		downstream_gene_variant	0.432 (19/49)
16	17902310	C	T	Tssk2	c.*2499C>T		downstream_gene_variant	0.432 (19/49)
6	122842795	A	T	C3ar1	c.*7028T>A		downstream_gene_variant	0.43 (53/119)
4	133556134	C	A	Gm23158	n.*2690G>T		downstream_gene_variant	0.423 (14/33)
11	103070817	G	A	Nmt1	c.*5049G>A		downstream_gene_variant	0.422 (21/49)
16	4624906	C	A	Coro7	c.*2588G>T		downstream_gene_variant	0.421 (9/22)
12	113611499	C	G	Ighv5-5	n.*1490G>C		downstream_gene_variant	0.42 (98/235)
13	54734126	C	G	Gprin1	c.*3535G>C		downstream_gene_variant	0.417 (15/36)
11	99985597	C	T	Gm11558	n.*2537G>A		downstream_gene_variant	0.417 (11/26)
12	113611501	A	C	Ighv5-5	n.*1488T>G		downstream_gene_variant	0.415 (98/234)
9	110635970	C	T	Mir8107	n.*29G>A		downstream_gene_variant	0.412 (9/22)
17	25244768	C	A	Tsr3	c.*2107C>A		downstream_gene_variant	0.412 (10/20)
17	25244768	C	A	Mir3547	n.*783G>T		downstream_gene_variant	0.412 (10/20)
16	36042896	T	C	Fam162a	c.*1103A>G		downstream_gene_variant	0.411 (69/176)
16	90987340	T	G	Gm15965	n.*103T>G		downstream_gene_variant	0.41 (21/53)
18	37443235	C	A	Pcdhb12	c.*5063C>A		downstream_gene_variant	0.41 (18/44)
7	141258818	G	T	Irf7	c.*4407C>A		downstream_gene_variant	0.409 (10/27)
7	105743830	C	A	Ilk	c.*1168C>A		downstream_gene_variant	0.405 (20/57)
7	105743830	C	A	Tpp1	c.*2802G>T		downstream_gene_variant	0.405 (20/57)
9	101126389	C	G	Gm37621	n.*4158C>G		downstream_gene_variant	0.405 (17/45)
8	105702246	CTG	C	Enkd1	c.*1613_*1614delCA		downstream_gene_variant	0.404 (50/117)
8	105702246	CTG	C	Rltpr	c.*4104_*4105delTG		downstream_gene_variant	0.404 (50/117)
7	4752147	C	A	Suv420h2	c.*5256C>A		downstream_gene_variant	0.404 (26/60)
7	4752147	C	A	Fam71e2	c.*1428G>T		downstream_gene_variant	0.404 (26/60)
13	21782934	C	G	Hist1h3i	c.*26G>C		downstream_gene_variant	0.404 (24/62)
13	21782934	C	G	Hist1h2an	c.*3892G>C		downstream_gene_variant	0.404 (24/62)
8	104548959	G	T	RP24-178J22.4	n.*2948C>A		downstream_gene_variant	0.4 (8/21)
5	137298227	C	A	Ache	c.*3989C>A		downstream_gene_variant	0.4 (41/99)
5	137298227	C	A	Mir8116	n.*4351C>A		downstream_gene_variant	0.4 (41/99)
5	137298227	C	A	Ufsp1	c.*2784C>A		downstream_gene_variant	0.4 (41/99)
17	56417050	T	A	Mir6977	n.*1796A>T		downstream_gene_variant	0.4 (12/29)
17	56097016	G	T	Plin4	c.*4991C>A		downstream_gene_variant	0.394 (16/43)
14	52770418	G	T	Trav7d-4	c.*26G>T		downstream_gene_variant	0.394 (13/33)
11	78583399	C	G	Gm11196	n.*1762G>C		downstream_gene_variant	0.392 (24/61)
6	42356508	A	T	Epha1	c.*2260T>A		downstream_gene_variant	0.391 (9/25)
4	133533395	C	A	Kdf1	c.*3026C>A		downstream_gene_variant	0.391 (32/79)
3	152458443	G	T	Ak5	c.*5505C>A		downstream_gene_variant	0.391 (20/51)
7	18988383	C	A	Gm10676	n.*1171G>T		downstream_gene_variant	0.39 (27/69)
7	18988382	C	A	Gm10676	n.*1172G>T		downstream_gene_variant	0.39 (27/68)
2	109675279	G	A	Gm20638	n.*1186G>A		downstream_gene_variant	0.388 (23/61)
X	7669408	C	A	Prickle3	c.*1677C>A		downstream_gene_variant	0.387 (26/75)
14	52160077	C	G	Supt16	c.*1600G>C		downstream_gene_variant	0.387 (13/35)
1	43060147	C	G	Gm28782	n.*3013C>G		downstream_gene_variant	0.385 (15/35)
7	44608515	G	T	Kcnc3	c.*6510G>T		downstream_gene_variant	0.381 (10/24)
9	75348092	C	A	Gnb5	c.*3128C>A		downstream_gene_variant	0.379 (13/35)
10	93489893	G	A	Lta4h	c.*5113G>A		downstream_gene_variant	0.378 (63/173)
5	137819036	A	C	Pilra	c.*4436T>G		downstream_gene_variant	0.375 (38/112)
10	91153048	A	G	Gm26765	n.*2454A>G		downstream_gene_variant	0.375 (25/69)
1	172318354	G	T	Kcnj9	c.*4509C>A		downstream_gene_variant	0.375 (14/35)
4	123295274	G	A	Gm25788	n.*3800G>A		downstream_gene_variant	0.373 (21/59)
4	123295274	G	A	Gm22154	n.*1992G>A		downstream_gene_variant	0.373 (21/59)
9	64725515	C	T	AC147560.1	n.*1109G>A		downstream_gene_variant	0.372 (20/54)
10	111299657	G	T	Osbpl8	c.*6433G>T		downstream_gene_variant	0.37 (59/153)
4	133966694	G	A	Dhdds	c.*4323C>T		downstream_gene_variant	0.369 (28/76)
7	45052856	C	G	Prrg2	c.*1323G>C		downstream_gene_variant	0.364 (9/23)
X	8085789	C	G	Gm22083	n.*1696C>G		downstream_gene_variant	0.364 (31/86)
19	5106959	C	A	Klc2	c.*1646G>T		downstream_gene_variant	0.364 (13/38)
X	150572099	C	A	Alas2	c.*1608C>A		downstream_gene_variant	0.362 (23/59)
1	39371269	G	A	Tbc1d8	c.*1080C>T		downstream_gene_variant	0.361 (34/86)
19	6080121	T	C	Zfpl1	c.*907A>G		downstream_gene_variant	0.361 (16/42)
18	36670009	G	T	Eif4ebp3	c.*4390G>T		downstream_gene_variant	0.36 (11/30)
14	54200381	A	C	Traj24	c.*4681A>C		downstream_gene_variant	0.358 (29/81)
14	54200381	A	C	Traj23	c.*4241A>C		downstream_gene_variant	0.358 (29/81)
14	54200381	A	C	Traj22	c.*3074A>C		downstream_gene_variant	0.358 (29/81)
14	54200381	A	C	Traj21	c.*1535A>C		downstream_gene_variant	0.358 (29/81)
14	54200381	A	C	Traj20	c.*883A>C		downstream_gene_variant	0.358 (29/81)
9	107931700	T	G	Gm37974	n.*3377A>C		downstream_gene_variant	0.358 (21/68)
1	74910747	G	A	Gm15841	n.*3094G>A		downstream_gene_variant	0.356 (21/59)
6	131288063	C	A	Gm44958	n.*3540G>T		downstream_gene_variant	0.355 (14/41)
16	20231826	G	T	Map6d1	c.*4136C>A		downstream_gene_variant	0.355 (14/41)
10	128548648	T	G	Gm29585	n.*3289T>G		downstream_gene_variant	0.354 (60/166)
2	25444110	G	T	Mir3087	n.*1276G>T		downstream_gene_variant	0.354 (21/57)
1	135154798	G	T	Gm15445	n.*992G>T		downstream_gene_variant	0.353 (21/61)
10	81181158	G	T	Snord37	n.*2145G>T		downstream_gene_variant	0.353 (20/57)
10	81181158	G	T	4930442H23Rik	c.*1718C>A		downstream_gene_variant	0.353 (20/57)
9	39046919	T	G	Gm25529	n.*1639A>C		downstream_gene_variant	0.35 (23/66)
8	3453224	G	T	Pex11g	c.*5976C>A		downstream_gene_variant	0.35 (10/27)
5	76229351	C	G	Ube2n-ps1	n.*3261G>C		downstream_gene_variant	0.349 (26/75)
2	90905644	T	G	Ptpmt1	n.*3072A>C		downstream_gene_variant	0.349 (18/50)
7	140096098	C	A	Fuom	c.*3437G>T		downstream_gene_variant	0.348 (9/25)
12	31327702	A	T	Dld	c.*4475T>A		downstream_gene_variant	0.348 (21/61)
16	11073668	T	G	Txndc11	c.*1350A>C		downstream_gene_variant	0.348 (16/52)
7	139976545	A	T	Adam8	c.*2932T>A		downstream_gene_variant	0.348 (10/28)
9	21034623	G	T	Icam4	c.*4129G>T		downstream_gene_variant	0.346 (13/32)
10	128953827	A	C	Mettl7b	c.*4892T>G		downstream_gene_variant	0.345 (35/104)
14	66157075	G	T	Chrna2	c.*5999G>T		downstream_gene_variant	0.345 (32/82)
12	54061946	C	A	1700060O08Rik	n.*102G>T		downstream_gene_variant	0.344 (14/38)
5	134263645	C	A	Gm43481	n.*3420G>T		downstream_gene_variant	0.344 (13/36)
11	94643321	A	C	Eme1	c.*2108T>G		downstream_gene_variant	0.342 (16/51)
7	127799094	G	A	Stx1b	c.*8215C>T		downstream_gene_variant	0.341 (23/59)
7	127799094	G	A	9430064I24Rik	n.*1000C>T		downstream_gene_variant	0.341 (23/59)
9	104167043	T	C	Hmgb1-rs16	n.*2156A>G		downstream_gene_variant	0.338 (30/88)
7	102711033	T	G	Olfr33	c.*2422A>C		downstream_gene_variant	0.336 (48/135)
7	102711033	T	G	RP24-306C18.12	n.*346A>C		downstream_gene_variant	0.336 (48/135)
13	54580724	C	G	Nop16	c.*3965G>C		downstream_gene_variant	0.333 (8/24)
13	54580724	C	G	Gm24195	n.*2475C>G		downstream_gene_variant	0.333 (8/24)
7	104335314	C	A	Trim12c	c.*5461G>T		downstream_gene_variant	0.333 (34/103)
7	104335314	C	A	Gm27995	n.*4776G>T		downstream_gene_variant	0.333 (34/103)
4	43493084	T	G	Arhgef39	c.*3594A>C		downstream_gene_variant	0.333 (29/93)
14	66149304	C	A	Ptk2b	c.*4750G>T		downstream_gene_variant	0.333 (25/71)
13	76056902	C	T	Arsk	c.*5354G>A		downstream_gene_variant	0.333 (21/70)
7	10748560	AT	A	RP23-44P12.3	n.*2335delT		downstream_gene_variant	0.333 (19/57)
7	29001870	G	T	Ryr1	c.*1588C>A		downstream_gene_variant	0.333 (17/51)
7	29001868	A	C	Ryr1	c.*1590T>G		downstream_gene_variant	0.333 (17/50)
1	63163836	C	A	Gm24557	n.*1893C>A		downstream_gene_variant	0.333 (16/48)
16	3976305	C	A	Slx4	c.*3516G>T		downstream_gene_variant	0.333 (12/37)
4	132499312	C	A	Gm12981	n.*4249G>T		downstream_gene_variant	0.333 (12/32)
11	115803620	C	A	Tmem94	c.*5273C>A		downstream_gene_variant	0.333 (11/31)
7	4143905	G	T	Leng9	c.*4313C>A		downstream_gene_variant	0.333 (10/31)
10	81523974	A	C	Gna11	c.*6821T>G		downstream_gene_variant	0.333 (10/29)
7	104341136	A	T	Trim34b	c.*4519A>T		downstream_gene_variant	0.329 (66/201)
11	97321559	G	T	Gm11594	n.*769C>A		downstream_gene_variant	0.328 (26/69)
11	115887924	C	T	Recql5	c.*5134G>A		downstream_gene_variant	0.328 (25/82)
13	75770689	A	T	Gm23127	n.*2492A>T		downstream_gene_variant	0.328 (22/73)
1	75212677	G	T	Tuba4a	c.*2945C>A		downstream_gene_variant	0.328 (21/70)
10	128227717	A	G	Gm26847	n.*2873T>C		downstream_gene_variant	0.326 (19/55)
12	103443619	C	A	Ifi27	c.*3448C>A		downstream_gene_variant	0.324 (29/91)
7	27354367	C	G	Sptbn4	c.*2925G>C		downstream_gene_variant	0.324 (16/46)
10	80322726	G	T	Apc2	c.*6701G>T		downstream_gene_variant	0.324 (16/46)
11	69852107	G	T	Plscr3	c.*1707G>T		downstream_gene_variant	0.324 (15/42)
11	69403737	C	G	Kdm6bos	n.*1037C>G		downstream_gene_variant	0.324 (13/40)
2	25090273	T	A	Entpd8	c.*5121T>A		downstream_gene_variant	0.323 (25/77)
1	45981797	C	G	Gm9496	n.*4822C>G		downstream_gene_variant	0.321 (81/262)
1	33667063	C	CT	Gm38173	n.*4851dupA		downstream_gene_variant	0.32 (54/162)
8	69883259	T	C	Yjefn3	c.*4558A>G		downstream_gene_variant	0.32 (10/31)
18	36993561	G	A	Gm36858	n.*3986G>A		downstream_gene_variant	0.317 (43/134)
9	45266632	A	C	Mir7086	n.*11T>G		downstream_gene_variant	0.317 (16/54)
9	75669316	G	T	Gm37871	n.*1977G>T		downstream_gene_variant	0.316 (28/83)
13	23752854	A	G	4930558J22Rik	n.*3349T>C		downstream_gene_variant	0.315 (19/62)
13	23752854	A	G	Hist1h2ab	c.*1329A>G		downstream_gene_variant	0.315 (19/62)
1	172215914	G	T	Gm17224	n.*2234G>T		downstream_gene_variant	0.314 (27/90)
4	43427171	G	T	Rusc2	c.*522G>T		downstream_gene_variant	0.314 (15/46)
4	156223431	C	G	Perm1	c.*3209C>G		downstream_gene_variant	0.314 (12/38)
7	105122122	T	A	Olfr682-ps1	n.*4244A>T		downstream_gene_variant	0.313 (59/183)
4	141465803	CG	C	Spen	c.*3102delC		downstream_gene_variant	0.313 (12/40)
10	23992398	C	A	Taar7a	c.*7G>T		downstream_gene_variant	0.312 (56/182)
7	103881741	G	A	Dnajc19-ps	n.*913C>T		downstream_gene_variant	0.311 (50/162)
3	96247566	A	C	Hist2h2aa1	c.*1593A>C		downstream_gene_variant	0.311 (30/100)
12	113717116	G	T	Gm37976	n.*1202C>A		downstream_gene_variant	0.31 (65/219)
10	79781198	G	C	Prss57	c.*2071C>G		downstream_gene_variant	0.31 (11/34)
7	105122120	C	A	Olfr682-ps1	n.*4246G>T		downstream_gene_variant	0.309 (60/187)
5	27856200	C	G	Htr5a	c.*5114C>G		downstream_gene_variant	0.309 (44/143)
5	27856200	C	G	Gm43096	n.*3818G>C		downstream_gene_variant	0.309 (44/143)
1	45981685	C	A	Gm9496	n.*4710C>A		downstream_gene_variant	0.309 (44/141)
6	125101598	G	T	Mir7045	n.*4512G>T		downstream_gene_variant	0.308 (9/31)
7	79453741	G	T	Fanci	c.*4030G>T		downstream_gene_variant	0.308 (15/45)
1	132939409	C	G	Gm38308	n.*4103G>C		downstream_gene_variant	0.308 (14/47)
9	109555326	A	T	Gm42756	n.*2546A>T		downstream_gene_variant	0.306 (37/118)
17	35835356	T	C	Flot1	c.*2817T>C		downstream_gene_variant	0.306 (33/110)
4	43427172	A	G	Rusc2	c.*523A>G		downstream_gene_variant	0.306 (15/45)
7	31072185	A	T	Lgi4	c.*2994A>T		downstream_gene_variant	0.304 (34/102)
18	75002736	A	C	Snord58b	n.*1613A>C		downstream_gene_variant	0.303 (38/113)
18	75002736	A	C	Gm23301	n.*1217A>C		downstream_gene_variant	0.303 (38/113)
18	75002736	A	C	Gm26202	n.*792A>C		downstream_gene_variant	0.303 (38/113)
2	131172782	A	G	Gm14232	n.*1440A>G		downstream_gene_variant	0.302 (23/74)
2	131172782	A	G	Cenpb	c.*5295T>C		downstream_gene_variant	0.302 (23/74)
7	6995514	TG	T	Zfp264	n.*4428delG		downstream_gene_variant	0.3 (45/132)
5	31154242	A	T	Gtf3c2	c.*3307T>A		downstream_gene_variant	0.3 (16/51)
16	50728202	C	A	Mir6363	n.*957C>A		downstream_gene_variant	0.298 (21/68)
5	146951204	G	A	Mtif3	c.*4390C>T		downstream_gene_variant	0.297 (70/228)
7	104266557	A	C	Trim34a	c.*5107A>C		downstream_gene_variant	0.297 (39/128)
18	37007179	C	T	Gm10545	n.*1689G>A		downstream_gene_variant	0.295 (25/86)
10	70284026	T	G	Gm7097	n.*209A>C		downstream_gene_variant	0.293 (22/72)
10	70284026	T	G	Gm9877	n.*1523A>C		downstream_gene_variant	0.293 (22/72)
7	19264488	T	A	1700058P15Rik	n.*4749T>A		downstream_gene_variant	0.293 (20/70)
9	37417262	A	C	Robo4	c.*3875A>C		downstream_gene_variant	0.292 (18/60)
5	87850906	T	A	Prr27	c.*4579T>A		downstream_gene_variant	0.29 (9/34)
12	102991444	G	T	Gm44324	n.*3481G>T		downstream_gene_variant	0.29 (61/208)
7	104164812	C	A	Olfr647-ps1	n.*2571G>T		downstream_gene_variant	0.289 (14/47)
2	88392227	T	C	Olfr1178	c.*7T>C		downstream_gene_variant	0.288 (20/69)
7	41400498	A	C	Gm17102	n.*3051A>C		downstream_gene_variant	0.287 (59/226)
17	56177006	G	A	Tnfaip8l1	c.*4734G>A		downstream_gene_variant	0.286 (8/24)
7	4522282	C	A	Dnaaf3	c.*1034G>T		downstream_gene_variant	0.286 (12/46)
18	61697303	T	A	Il17b	c.*4866T>A		downstream_gene_variant	0.286 (10/36)
7	126495173	A	C	Tufm	c.*4679A>C		downstream_gene_variant	0.283 (18/60)
13	100607769	G	C	Gm24261	n.*3307G>C		downstream_gene_variant	0.282 (35/132)
1	40767711	G	T	Mfsd9	c.*6042C>A		downstream_gene_variant	0.282 (13/46)
13	75770481	A	G	Gm23127	n.*2284A>G		downstream_gene_variant	0.282 (12/41)
2	37105636	G	A	Olfr363-ps	n.*621C>T		downstream_gene_variant	0.281 (12/41)
16	56762048	C	G	Gm15693	n.*3147C>G		downstream_gene_variant	0.28 (53/182)
16	17568055	G	C	Slc7a4	c.*5222C>G		downstream_gene_variant	0.278 (27/97)
7	30564281	G	T	Kmt2b	c.*4880C>A		downstream_gene_variant	0.278 (24/85)
12	81559743	T	G	6530401F13Rik	n.*2285T>G		downstream_gene_variant	0.277 (36/121)
17	25784987	G	C	Narfl	c.*2733G>C		downstream_gene_variant	0.277 (14/60)
17	25784987	G	C	Mir6966	n.*4108G>C		downstream_gene_variant	0.277 (14/60)
5	134293926	T	G	Gm43480	n.*4872A>C		downstream_gene_variant	0.276 (25/101)
11	97690021	T	G	Cisd3	c.*1574T>G		downstream_gene_variant	0.276 (13/37)
11	97690021	T	G	Mllt6	c.*8434T>G		downstream_gene_variant	0.276 (13/37)
11	84909350	GCA	G	Znhit3	c.*2115_*2116delTG		downstream_gene_variant	0.273 (9/38)
4	144522397	C	T	Gm13121	n.*4014G>A		downstream_gene_variant	0.273 (9/37)
17	34200856	G	C	Tap1	c.*4082G>C		downstream_gene_variant	0.273 (20/74)
7	142443410	A	T	Syt8	c.*3109A>T		downstream_gene_variant	0.273 (11/41)
5	5135322	G	T	Gm43623	n.*2123C>A		downstream_gene_variant	0.272 (63/233)
1	87099072	T	C	Gm29371	n.*2654T>C		downstream_gene_variant	0.272 (29/109)
19	45001223	G	A	Mrpl43	c.*4476C>T		downstream_gene_variant	0.269 (9/37)
5	31196993	A	C	Zfp513	c.*2328T>G		downstream_gene_variant	0.269 (10/33)
11	67210498	C	A	Gm12300	n.*758G>T		downstream_gene_variant	0.268 (29/110)
16	45129694	G	C	Ccdc80	c.*2184G>C		downstream_gene_variant	0.268 (11/44)
1	44218044	T	G	Gm15833	n.*4926T>G		downstream_gene_variant	0.267 (14/48)
7	44221699	G	T	Klk1b5	c.*1045G>T		downstream_gene_variant	0.267 (10/36)
5	120683295	T	C	Rasal1	c.*4267T>C		downstream_gene_variant	0.265 (24/82)
7	103839321	T	C	Hbb-bh1	c.*2431A>G		downstream_gene_variant	0.265 (10/36)
1	160989456	T	G	Gm37729	n.*2527T>G		downstream_gene_variant	0.263 (19/66)
9	98586146	A	C	Mrps22	c.*2685T>G		downstream_gene_variant	0.263 (11/43)
2	130281542	T	A	Nop56	c.*2319T>A		downstream_gene_variant	0.262 (21/72)
2	130281542	T	A	Gm23187	n.*4262T>A		downstream_gene_variant	0.262 (21/72)
2	130281542	T	A	Gm23650	n.*3776T>A		downstream_gene_variant	0.262 (21/72)
2	130281542	T	A	Snord57	n.*3455T>A		downstream_gene_variant	0.262 (21/72)
7	107747594	C	A	Cyb5r2	c.*2630G>T		downstream_gene_variant	0.262 (12/49)
12	115495645	C	T	Gm27722	n.*3374G>A		downstream_gene_variant	0.258 (98/379)
18	36682763	G	T	E230025N22Rik	c.*2563C>A		downstream_gene_variant	0.257 (9/35)
4	44994595	G	A	Grhpr	c.*4097G>A		downstream_gene_variant	0.257 (27/95)
19	10785527	C	A	Cd6	c.*4646G>T		downstream_gene_variant	0.256 (13/48)
12	88028296	A	C	Gm2056	c.*858A>C		downstream_gene_variant	0.256 (10/44)
1	83209255	A	C	Gm6244	n.*2789T>G		downstream_gene_variant	0.255 (16/61)
2	80502198	A	G	Gm13687	n.*2687A>G		downstream_gene_variant	0.254 (20/78)
7	79827639	G	C	Gm44974	n.*2954C>G		downstream_gene_variant	0.254 (19/87)
3	92318085	GA	G	Sprr2b	c.*341delA		downstream_gene_variant	0.253 (31/116)
4	44994596	G	A	Grhpr	c.*4098G>A		downstream_gene_variant	0.253 (27/92)
5	30371586	G	T	Drc1	c.*5036G>T		downstream_gene_variant	0.25 (9/37)
13	19257185	CT	C	Trgj3	c.*10delT		downstream_gene_variant	0.25 (30/124)
10	78441187	GT	G	Mir6908	n.*3907delA		downstream_gene_variant	0.25 (29/104)
3	105921881	T	C	I830077J02Rik	c.*4559A>G		downstream_gene_variant	0.25 (26/94)
9	120130346	A	T	Gm24044	n.*1411A>T		downstream_gene_variant	0.25 (19/77)
9	120130346	A	T	Gm26448	n.*793A>T		downstream_gene_variant	0.25 (19/77)
13	23934086	TG	T	Gm44344	n.*620delC		downstream_gene_variant	0.25 (17/70)
8	111627520	G	T	Znrf1	c.*5867G>T		downstream_gene_variant	0.25 (13/56)
1	134494757	G	T	Klhl12	c.*5299G>T		downstream_gene_variant	0.25 (12/43)
5	120487390	T	G	Sds	c.*3612T>G		downstream_gene_variant	0.25 (10/44)
4	148568527	A	G	Gm13204	n.*529T>C		downstream_gene_variant	0.247 (27/102)
11	101078413	G	C	Naglu	c.*968G>C		downstream_gene_variant	0.247 (24/108)
17	34718983	A	C	Cyp21a2-ps	n.*830T>G		downstream_gene_variant	0.244 (14/54)
7	126368897	G	C	Spns1	c.*1422C>G		downstream_gene_variant	0.244 (13/47)
1	93354354	C	A	Mir6345	n.*2069C>A		downstream_gene_variant	0.241 (22/96)
2	69273992	G	T	Gm13613	n.*1501G>T		downstream_gene_variant	0.241 (18/70)
1	87099872	C	G	Gm29371	n.*3454C>G		downstream_gene_variant	0.241 (15/67)
1	34804926	G	T	Gm38336	n.*4434C>A		downstream_gene_variant	0.239 (17/64)
1	153452274	G	T	Dhx9	c.*3795C>A		downstream_gene_variant	0.238 (47/203)
17	47413734	T	G	Gm5814	c.*2994T>G		downstream_gene_variant	0.237 (26/111)
14	54156168	T	G	Traj61	n.*1092T>G		downstream_gene_variant	0.237 (25/122)
14	54156168	T	G	Traj60	n.*182T>G		downstream_gene_variant	0.237 (25/122)
19	11511624	G	C	Gm19261	n.*4587C>G		downstream_gene_variant	0.237 (22/88)
5	120652816	C	T	Gm15749	n.*4067C>T		downstream_gene_variant	0.236 (31/120)
9	45102992	C	T	Gm10684	c.*4606G>A		downstream_gene_variant	0.236 (14/64)
3	144816695	G	C	Gm43240	n.*3157G>C		downstream_gene_variant	0.233 (41/169)
11	83525974	A	T	Gm23247	n.*4712A>T		downstream_gene_variant	0.233 (27/127)
1	132508211	G	T	Rbbp5	c.*4419G>T		downstream_gene_variant	0.233 (17/67)
1	132508211	G	T	Cntn2	c.*7323C>A		downstream_gene_variant	0.233 (17/67)
1	135161165	G	A	Arl8a	c.*5894G>A		downstream_gene_variant	0.233 (13/52)
11	68990070	T	C	Mir3062	n.*504A>G		downstream_gene_variant	0.233 (13/51)
16	30267482	A	C	Lrrc15	c.*5298T>G		downstream_gene_variant	0.233 (12/51)
3	123507991	C	G	Prss12	c.*1464C>G		downstream_gene_variant	0.233 (10/52)
3	123507991	C	G	Gm9369	n.*1951G>C		downstream_gene_variant	0.233 (10/52)
3	96220051	G	T	Hist2h2ac	c.*404C>A		downstream_gene_variant	0.232 (25/115)
1	151448539	G	T	Gm37893	n.*798G>T		downstream_gene_variant	0.231 (15/64)
2	112243319	G	C	Nutm1	c.*4869C>G		downstream_gene_variant	0.229 (9/39)
2	118122922	T	G	Gm29233	n.*529A>C		downstream_gene_variant	0.229 (33/130)
11	51091864	TC	T	9230009I02Rik	n.*32delC		downstream_gene_variant	0.229 (22/106)
1	52105198	T	G	RP24-194N4.6	n.*2923A>C		downstream_gene_variant	0.228 (56/250)
2	3329522	T	G	Nmt2	c.*3431T>G		downstream_gene_variant	0.228 (36/137)
11	114786590	A	T	Btbd17	c.*4858T>A		downstream_gene_variant	0.227 (8/28)
1	150454572	G	T	Tpr	c.*4785G>T		downstream_gene_variant	0.227 (108/472)
4	116990263	G	C	Zswim5	c.*2930G>C		downstream_gene_variant	0.226 (15/75)
11	69347818	G	A	Gm22442	n.*2700C>T		downstream_gene_variant	0.225 (23/102)
12	84370963	G	C	Entpd5	c.*6331C>G		downstream_gene_variant	0.224 (14/62)
15	5118592	C	G	Snord72	n.*108C>G		downstream_gene_variant	0.223 (43/196)
15	5118592	C	G	Gm10250	c.*2061G>C		downstream_gene_variant	0.223 (43/196)
3	28805564	G	T	Gm33051	n.*1641C>A		downstream_gene_variant	0.222 (9/46)
2	129204100	T	G	9830144P21Rik	n.*1858A>C		downstream_gene_variant	0.222 (60/256)
2	85868671	C	A	Olfr1021-ps1	n.*4310C>A		downstream_gene_variant	0.222 (39/187)
11	59571616	C	A	Nlrp3	c.*5353C>A		downstream_gene_variant	0.222 (12/61)
3	89089494	C	T	Fdps	c.*4149G>A		downstream_gene_variant	0.22 (43/175)
18	37479160	C	A	Pcdhb15	c.*3083C>A		downstream_gene_variant	0.22 (34/148)
16	91617033	G	A	Gart	c.*4524C>T		downstream_gene_variant	0.22 (27/119)
1	171515176	G	T	Itln1	c.*3065C>A		downstream_gene_variant	0.22 (16/74)
1	83210526	C	T	Gm6244	n.*1518G>A		downstream_gene_variant	0.22 (16/72)
8	83673497	C	T	Ptger1	c.*3964C>T		downstream_gene_variant	0.22 (11/54)
1	153452385	T	G	Dhx9	c.*3684A>C		downstream_gene_variant	0.219 (35/168)
3	96263093	A	C	Gm20628	n.*3982T>G		downstream_gene_variant	0.218 (25/124)
3	96263094	C	A	Gm20628	n.*3981G>T		downstream_gene_variant	0.218 (25/124)
6	69992439	T	G	Igkv18-36	c.*26A>C		downstream_gene_variant	0.218 (22/99)
8	105385136	A	C	Plekhg4	c.*2895A>C		downstream_gene_variant	0.218 (20/95)
1	74585270	A	G	Gm25035	n.*1626T>C		downstream_gene_variant	0.217 (20/97)
11	115416877	C	A	Ict1	c.*6155C>A		downstream_gene_variant	0.215 (44/189)
11	84834533	T	A	4930502E09Rik	n.*3665T>A		downstream_gene_variant	0.215 (17/83)
10	111988837	G	T	Krr1	c.*4156G>T		downstream_gene_variant	0.214 (9/34)
2	36569540	G	C	Olfr344	c.*11G>C		downstream_gene_variant	0.212 (12/61)
9	110547275	A	G	Gm42763	n.*1978A>G		downstream_gene_variant	0.211 (17/89)
11	46138933	G	C	Gm16034	n.*4964C>G		downstream_gene_variant	0.211 (17/83)
11	46138933	G	C	Gm16033	n.*4850C>G		downstream_gene_variant	0.211 (17/83)
11	54402035	C	G	Gm12226	n.*68C>G		downstream_gene_variant	0.209 (25/129)
3	92353462	AT	A	Sprr2e	c.*369delT		downstream_gene_variant	0.206 (19/88)
11	6403871	G	T	Mir7651	n.*2178G>T		downstream_gene_variant	0.205 (9/50)
2	91190940	C	A	Gm13783	n.*4966G>T		downstream_gene_variant	0.205 (10/47)
19	6345450	G	T	Men1	c.*5278G>T		downstream_gene_variant	0.204 (13/64)
5	115345908	C	T	Triap1	c.*3150C>T		downstream_gene_variant	0.203 (34/159)
9	110635622	C	T	Mir8107	n.*377G>A		downstream_gene_variant	0.2 (9/35)
11	87426869	G	C	Rnu1a1	n.*3839G>C		downstream_gene_variant	0.2 (22/111)
5	120861504	T	G	Oas1f	c.*3878T>G		downstream_gene_variant	0.197 (16/78)
1	32547125	C	G	Gm37792	n.*4685C>G		downstream_gene_variant	0.196 (9/46)
2	180179659	C	A	Adrm1	c.*3479C>A		downstream_gene_variant	0.196 (10/54)
2	180179659	C	A	Mir7005	n.*96G>T		downstream_gene_variant	0.196 (10/54)
6	113628080	T	G	1700015O11Rik	n.*3569A>C		downstream_gene_variant	0.195 (45/216)
2	29996231	G	GA	Mir6997	n.*211_*212insA		downstream_gene_variant	0.194 (8/47)
18	37491717	C	A	Pcdhb17	c.*4159C>A		downstream_gene_variant	0.193 (42/220)
11	82982435	C	A	Mir7679	n.*2568G>T		downstream_gene_variant	0.192 (47/229)
8	95748277	C	G	Mir7073	n.*4874G>C		downstream_gene_variant	0.192 (15/86)
2	121407385	C	A	Gm14000	n.*1912C>A		downstream_gene_variant	0.191 (13/56)
17	24506473	G	T	Traf7	c.*2871C>A		downstream_gene_variant	0.19 (9/49)
8	84868962	G	A	Mir7069	n.*954G>A		downstream_gene_variant	0.19 (8/51)
11	70513727	C	T	Tm4sf5	c.*2871C>T		downstream_gene_variant	0.19 (11/52)
11	70513727	C	T	Gm12317	n.*3998G>A		downstream_gene_variant	0.19 (11/52)
11	3133105	G	A	Pisd-ps1	n.*2101G>A		downstream_gene_variant	0.189 (11/61)
2	120502953	T	A	Zfp106	c.*7133A>T		downstream_gene_variant	0.188 (17/88)
11	78075620	T	G	Mir144	n.*2550T>G		downstream_gene_variant	0.188 (15/81)
11	78075620	T	G	Mir451a	n.*2379T>G		downstream_gene_variant	0.188 (15/81)
11	50202884	C	T	3010026O09Rik	c.*2866C>T		downstream_gene_variant	0.184 (9/56)
11	90649311	A	G	Cox11	c.*4759A>G		downstream_gene_variant	0.184 (10/67)
1	32546865	G	T	Gm37792	n.*4425G>T		downstream_gene_variant	0.183 (31/163)
1	63183902	A	G	Eef1b2	c.*4290A>G		downstream_gene_variant	0.182 (9/50)
1	63183902	A	G	Snora41	n.*4767A>G		downstream_gene_variant	0.182 (9/50)
2	87544621	A	C	Gm13740	n.*2272T>G		downstream_gene_variant	0.182 (38/208)
2	164890620	G	T	Zfp335	c.*1544C>A		downstream_gene_variant	0.182 (12/69)
2	14035795	C	A	Gm37894	n.*2030G>T		downstream_gene_variant	0.181 (18/102)
2	91140638	G	T	Mybpc3	c.*4524G>T		downstream_gene_variant	0.181 (14/77)
3	93279962	A	C	Rplp0-ps1	n.*889A>C		downstream_gene_variant	0.179 (8/47)
2	155815821	C	G	BC029722	c.*3104G>C		downstream_gene_variant	0.179 (10/62)
2	155815821	C	G	Eif6	c.*4281G>C		downstream_gene_variant	0.179 (10/62)
1	58992999	G	T	Als2cr11b	n.*4124C>A		downstream_gene_variant	0.178 (14/84)
2	32686556	C	G	Eng	c.*4995C>G		downstream_gene_variant	0.178 (10/57)
2	32686556	C	G	Mir8093	n.*1074G>C		downstream_gene_variant	0.178 (10/57)
1	14252430	G	C	Gm37444	n.*3122C>G		downstream_gene_variant	0.177 (14/75)
6	41618723	A	G	Trpv6	c.*2345T>C		downstream_gene_variant	0.176 (8/44)
11	121161048	A	C	Gm11790	n.*4423T>G		downstream_gene_variant	0.176 (13/79)
8	85084830	G	C	Wdr83os	c.*2818G>C		downstream_gene_variant	0.173 (11/62)
8	86667654	A	T	Gm22305	n.*3582T>A		downstream_gene_variant	0.171 (8/47)
2	26955506	C	A	Stkld1	c.*2115C>A		downstream_gene_variant	0.171 (16/101)
5	120649550	C	G	Gm15749	n.*801C>G		downstream_gene_variant	0.17 (10/61)
2	37085636	C	G	Gm13434	n.*2652G>C		downstream_gene_variant	0.168 (17/106)
11	120485613	G	C	Hgs	c.*2114G>C		downstream_gene_variant	0.165 (22/123)
11	120485613	G	C	Gm16755	n.*726C>G		downstream_gene_variant	0.165 (22/123)
11	120485613	G	C	Gm11788	n.*3793C>G		downstream_gene_variant	0.165 (22/123)
1	63756335	T	A	Fastkd2	c.*3931T>A		downstream_gene_variant	0.164 (9/63)
5	137037470	G	A	Vgf	c.*4631G>A		downstream_gene_variant	0.163 (9/56)
8	3657330	T	C	Gm44776	n.*3269A>G		downstream_gene_variant	0.163 (8/49)
2	152573833	C	A	Defb19	c.*2330G>T		downstream_gene_variant	0.159 (22/140)
2	152573833	C	A	Gm17416	c.*4295C>A		downstream_gene_variant	0.159 (22/140)
2	88755797	T	G	Gm13760	n.*854A>C		downstream_gene_variant	0.159 (13/84)
1	172215452	C	A	Gm17224	n.*1772C>A		downstream_gene_variant	0.158 (10/65)
11	101628468	G	T	Gm23849	n.*912G>T		downstream_gene_variant	0.156 (8/49)
11	46239999	T	G	Fndc9	c.*1663T>G		downstream_gene_variant	0.152 (20/139)
11	46239999	T	G	Gm12568	n.*3572A>C		downstream_gene_variant	0.152 (20/139)
1	143685940	C	A	Gm6397	n.*1642C>A		downstream_gene_variant	0.152 (12/92)
17	35825823	A	C	Ier3	c.*3513A>C		downstream_gene_variant	0.15 (8/52)
1	156285578	T	C	A430050A11Rik	n.*4524A>G		downstream_gene_variant	0.15 (18/133)
17	35253154	C	A	Mir8094	n.*1749C>A		downstream_gene_variant	0.148 (8/62)
13	74165856	G	A	Exoc3	c.*6217C>T		downstream_gene_variant	0.145 (13/82)
2	65363939	C	A	Mir6337	n.*357G>T		downstream_gene_variant	0.143 (10/62)
2	181423588	T	A	Gm22708	n.*2347A>T		downstream_gene_variant	0.141 (10/83)
6	41271410	T	G	Trbv28	n.*4260T>G		downstream_gene_variant	0.14 (24/149)
2	156067487	A	T	Cpne1	c.*6034T>A		downstream_gene_variant	0.135 (8/64)
2	156067487	A	T	Gm28036	c.*11934T>A		downstream_gene_variant	0.135 (8/64)
8	94673041	T	A	Pllp	c.*3122A>T		downstream_gene_variant	0.132 (9/90)
5	145132838	G	T	Arpc1b	c.*4979G>T		downstream_gene_variant	0.132 (24/167)
11	116478618	C	A	Gm11739	n.*4344C>A		downstream_gene_variant	0.13 (8/64)
6	73022309	T	G	Gm44031	n.*1949T>G		downstream_gene_variant	0.128 (14/91)
1	135452886	C	A	Mir1231	n.*1717G>T		downstream_gene_variant	0.125 (10/81)
2	180935331	C	G	Birc7	c.*2001C>G		downstream_gene_variant	0.124 (14/127)
4	145467929	A	G	Smarca5-ps	n.*509A>G		downstream_gene_variant	0.123 (19/152)
4	145467929	A	G	Gm13229	n.*1782T>C		downstream_gene_variant	0.123 (19/152)
2	72970167	C	G	Gm11084	c.*1381G>C		downstream_gene_variant	0.121 (12/106)
10	121617174	T	G	Gm24330	n.*1294A>C		downstream_gene_variant	0.12 (13/111)
13	21754154	C	A	Gm44454	n.*572C>A		downstream_gene_variant	0.116 (10/89)
3	93395018	G	A	Gm37857	n.*122G>A		downstream_gene_variant	0.113 (10/70)
3	152391683	C	T	Gm43858	n.*3646C>T		downstream_gene_variant	0.11 (30/285)
2	25778988	G	T	Gm13538	n.*4952C>A		downstream_gene_variant	0.107 (16/148)
2	139589649	G	C	Gm27385	n.*1319G>C		downstream_gene_variant	0.105 (12/120)
2	25701080	AAC	A	A230005M16Rik	n.*4768_*4769delGT		downstream_gene_variant	0.101 (13/136)
6	78377142	A	T	Reg3b	c.*3876A>T		downstream_gene_variant	0.081 (8/91)
11	62314090	C	T	Ncor1	c.*3753G>A		downstream_gene_variant	0.076 (8/100)
7	104260539	T	G	Trim5	c.*4828A>C		downstream_gene_variant	0.076 (11/133)
7	104260539	T	G	Gm24846	n.*4144A>C		downstream_gene_variant	0.076 (11/133)
4	132270198	G	A	Gm28874	n.*1357G>A		downstream_gene_variant	0.074 (14/162)
3	94955815	G	A	B230398E01Rik	n.*3219C>T		downstream_gene_variant	0.073 (9/132)
17	26088025	G	C	Nme4	c.*4004C>G		downstream_gene_variant	0.069 (9/141)
9	39078438	G	C	Gm25032	n.*2944G>C		downstream_gene_variant	0.055 (10/158)
17	56070925	G	A	Chaf1a	c.*3375G>A		downstream_gene_variant	-
2	156003858	T	A	Cep250	c.*5427T>A		downstream_gene_variant	-
4	149647507	A	G	Pik3cd	c.*3133T>C		downstream_gene_variant	-
7	118127127	CACTT	C	Smg1	c.*8410_*8413delAAGT		downstream_gene_variant	-
8	84924000	T	TC	Gm24197	n.*1524dupG		downstream_gene_variant	-
8	110418508	C	T	Gm23627	n.*2853G>A		downstream_gene_variant	-
5	146950493	A	T	Mtif3	c.*5101T>A		downstream_gene_variant	-
5	146950495	G	T	Mtif3	c.*5099C>A		downstream_gene_variant	-
7	104357653	T	C	Trim30b	c.*5956A>G		downstream_gene_variant&intragenic_variant	1.0 (24/24)
17	83818466	G	T	Mta3	c.*3805G>T		downstream_gene_variant&intragenic_variant	0.632 (46/72)
11	24172654	G	T	Bcl11a	c.*7488G>T		downstream_gene_variant&intragenic_variant	0.621 (41/65)
8	105894416	G	T	Edc4	c.*1554G>T		downstream_gene_variant&intragenic_variant	0.568 (62/103)
7	101913426	G	T	Lamtor1	c.*2061G>T		downstream_gene_variant&intragenic_variant	0.556 (19/32)
8	83669383	G	T	Pkn1	c.*782C>A		downstream_gene_variant&intragenic_variant	0.548 (26/50)
8	83724039	A	C	Ddx39	c.*898A>C		downstream_gene_variant&intragenic_variant	0.544 (36/70)
3	88817613	TG	T	1500004A13Rik	n.*2031delC		downstream_gene_variant&intragenic_variant	0.469 (15/32)
6	47954561	G	A	Zfp783	n.*12G>A		downstream_gene_variant&intragenic_variant	0.444 (35/69)
3	90001817	C	T	Gm19710	n.*492C>T		downstream_gene_variant&intragenic_variant	0.434 (63/144)
7	25631143	T	C	B3gnt8	c.*1827T>C		downstream_gene_variant&intragenic_variant	0.4 (17/43)
18	36670009	G	T	Sra1	c.*1430C>A		downstream_gene_variant&intragenic_variant	0.36 (11/30)
7	7231693	G	T	RP24-77E13.10	c.*2666C>A		downstream_gene_variant&intragenic_variant	0.302 (100/345)
8	77242564	A	G	Nr3c2	c.*34A>G		downstream_gene_variant&intragenic_variant	0.267 (8/35)
7	35200330	T	A	Lrp3	c.*1752A>T		downstream_gene_variant&intragenic_variant	0.241 (18/67)
1	171220648	T	A	Nr1i3	c.*1930T>A		downstream_gene_variant&intragenic_variant	0.237 (18/73)
4	90225381	CA	C	Zfp352	c.*102delA		downstream_gene_variant&intragenic_variant	0.216 (18/87)
8	84915823	G	T	Dnase2a	c.*4791G>T		downstream_gene_variant&intragenic_variant	0.169 (19/119)
18	61587415	T	A	Csnk1a1	c.*2086T>A		downstream_gene_variant&intragenic_variant	0.132 (23/141)
7	102113333	C	G	Art1	c.*2532C>G		downstream_gene_variant&intragenic_variant	-
11	69805210	AC	A	Tmem102	c.23delG	p.Gly8fs	frameshift_variant	0.923 (17/18)
8	72207139	AG	A	Cib3	c.252delC	p.Phe85fs	frameshift_variant	0.593 (41/68)
11	6514784	GGT	G	Myo1g	c.1487_1488delAC	p.His496fs	frameshift_variant	0.548 (25/47)
4	144207199	CTG	C	C87977	c.1335_1336delCA	p.His445fs	frameshift_variant	0.538 (174/323)
4	115496099	TA	T	Cyp4a14	c.14delT	p.Leu5fs	frameshift_variant	0.522 (17/32)
18	42333234	TG	T	Rbm27	c.2664delG	p.Arg889fs	frameshift_variant	0.511 (34/66)
3	109112118	GT	G	Slc25a54	c.1039delT	p.Tyr347fs	frameshift_variant	0.5 (57/113)
3	86998241	TC	T	Cd1d1	c.443delG	p.Gly148fs	frameshift_variant	0.484 (56/116)
4	113238293	TTG	T	Skint6	c.166_167delCA	p.Gln56fs	frameshift_variant	0.479 (79/170)
4	113238291	G	GCC	Skint6	c.169_170insGG	p.Ala57fs	frameshift_variant	0.479 (76/163)
4	153960665	CG	C	A430005L14Rik	c.265delG	p.Val89fs	frameshift_variant	0.476 (22/49)
6	114480631	AG	A	Hrh1	c.877delG	p.Glu293fs	frameshift_variant	0.475 (24/51)
19	56345517	CTG	C	Nrap	c.3010_3011delCA	p.Gln1004fs	frameshift_variant	0.471 (17/41)
4	149654847	TG	T	Pik3cd	c.1932delC	p.Lys645fs	frameshift_variant	0.465 (56/124)
4	111617242	TG	T	Agbl4	c.1232delG	p.Gly411fs	frameshift_variant	0.455 (52/106)
10	116302156	A	AGG	Ptprb	c.105_106dupGG	p.Val36fs	frameshift_variant	0.455 (23/51)
3	88071058	TG	T	Ttc24	c.804delC	p.Thr269fs	frameshift_variant	0.449 (40/88)
8	105702246	CTG	C	Pard6a	c.143_144delTG	p.Val48fs	frameshift_variant	0.404 (50/117)
4	86445803	AG	A	Saxo1	c.441delC	p.Trp148fs	frameshift_variant	0.4 (24/55)
3	130182795	AC	A	Col25a1	c.329delC	p.Thr110fs	frameshift_variant	0.397 (35/99)
9	39237512	AT	A	Olfr1537	c.919delA	p.Ile307fs	frameshift_variant	0.385 (44/115)
1	180668836	A	AC	Lin9	c.944dupC	p.Arg316fs	frameshift_variant	0.382 (86/224)
13	43059656	C	CA	Phactr1	c.756dupA	p.Ser253fs	frameshift_variant	0.382 (16/40)
6	128618585	GT	G	Klrb1a	c.303delA	p.Gln102fs	frameshift_variant	0.335 (72/228)
12	44295990	CAG	C	Pnpla8	c.1530_1531delGA	p.Asn511fs	frameshift_variant	0.333 (23/66)
7	10748560	AT	A	Vmn1r71	c.199delA	p.Met67fs	frameshift_variant	0.333 (19/57)
14	30899462	GAA	G	Itih4	c.2482_2483delAA	p.Lys828fs	frameshift_variant	0.333 (17/49)
17	37446207	AT	A	Olfr108	c.658delT	p.Tyr220fs	frameshift_variant	0.327 (59/184)
17	37446207	AT	A	Olfr108	c.691delT	p.Tyr231fs	frameshift_variant	0.327 (59/184)
5	6770635	A	AT	Zfp804b	c.2426dupA	p.Asn809fs	frameshift_variant	0.325 (26/88)
1	33667063	C	CT	Prim2	c.239dupA	p.Leu81fs	frameshift_variant	0.32 (54/162)
5	71442984	TG	T	Cox7b2	c.229delC	p.Gln77fs	frameshift_variant	0.32 (16/56)
7	86800904	GA	G	Vmn2r77	c.365delA	p.Lys122fs	frameshift_variant	0.313 (16/57)
4	141465803	CG	C	Zbtb17	c.1636delG	p.Glu546fs	frameshift_variant	0.313 (12/40)
18	37413395	AC	A	Pcdhb10	c.1524delC	p.Asp508fs	frameshift_variant	0.309 (27/89)
16	35841556	A	AT	Parp14	c.4107dupA	p.Ser1370fs	frameshift_variant	0.3 (47/148)
7	6995514	TG	T	Aurkc	c.74delG	p.Gly25fs	frameshift_variant	0.3 (45/132)
1	53891251	CA	C	Hecw2	c.3027delT	p.Phe1009fs	frameshift_variant	0.292 (15/60)
11	73965297	TC	T	Olfr397	c.689delC	p.Ser230fs	frameshift_variant	0.283 (32/114)
1	93873749	G	GT	Gal3st2	c.279dupT	p.Val94fs	frameshift_variant	0.281 (18/64)
11	84909350	GCA	G	Myo19	c.2566_2567delAC	p.Thr856fs	frameshift_variant	0.273 (9/38)
6	42762356	AT	A	Olfr38	c.310delT	p.Ser104fs	frameshift_variant	0.273 (47/158)
9	18815980	AG	A	Olfr828	c.312delC	p.Leu105fs	frameshift_variant	0.269 (20/79)
16	33540965	CG	C	Slc12a8	c.311delG	p.Gly104fs	frameshift_variant	0.268 (18/68)
10	78441187	GT	G	Pdxk	c.775delA	p.Thr259fs	frameshift_variant	0.25 (29/104)
4	124797840	CA	C	Inpp5b	c.2558delA	p.Gln853fs	frameshift_variant	0.25 (19/79)
13	23934086	TG	T	Hist1h2ba	c.70delC	p.Gln24fs	frameshift_variant	0.25 (17/70)
9	7168730	AC	A	Dync2h1	c.1081delG	p.Val361fs	frameshift_variant	0.25 (13/46)
1	67148719	CT	C	Cps1	c.540delT	p.Lys182fs	frameshift_variant	0.247 (24/103)
5	110596146	CG	C	Galnt9	c.846delG	p.Phe283fs	frameshift_variant	0.241 (8/37)
11	103615519	TG	T	Gm884	c.5621delC	p.Pro1874fs	frameshift_variant	0.234 (32/142)
1	19226608	G	GC	Tfap2b	c.779dupC	p.Glu261fs	frameshift_variant	0.233 (8/37)
19	6368418	T	TC	Sf1	c.221dupC	p.Asn75fs	frameshift_variant	0.226 (25/101)
2	27459694	GC	G	Brd3	c.845delG	p.Gly282fs	frameshift_variant	0.22 (12/50)
2	25297907	GCT	G	Grin1	c.1574_1575delAG	p.Glu525fs	frameshift_variant	0.216 (10/51)
4	143811898	GT	G	Gm13084	c.501delA	p.Glu167fs	frameshift_variant	0.214 (20/87)
3	94779432	GC	G	Cgn	c.558delG	p.Gln187fs	frameshift_variant	0.206 (10/40)
2	122178813	CG	C	Trim69	c.1356delG	p.Gln453fs	frameshift_variant	0.203 (19/82)
4	96769648	GT	G	Gm12695	c.282delA	p.Lys94fs	frameshift_variant	0.196 (25/128)
11	58206705	A	AC	Igtp	c.709dupC	p.Leu237fs	frameshift_variant	0.196 (23/121)
2	29996231	G	GA	Sptan1	c.2408dupA	p.Glu804fs	frameshift_variant	0.194 (8/47)
2	102400068	C	CA	Trim44	c.616_617insT	p.Gly206fs	frameshift_variant	0.193 (19/103)
1	100383604	AC	A	Cntnap5b	c.2936delC	p.Pro979fs	frameshift_variant	0.19 (31/140)
2	120990451	GC	G	Tmem62	c.989delC	p.Pro330fs	frameshift_variant	0.162 (22/131)
2	89282897	T	TG	Olfr1229	c.297dupC	p.Lys100fs	frameshift_variant	0.155 (9/65)
1	34225634	AG	A	Dst	c.14461delG	p.Ala4821fs	frameshift_variant	0.153 (15/103)
2	84609070	GA	G	Ctnnd1	c.2439delT	p.Arg814fs	frameshift_variant	0.137 (8/57)
2	84609070	GA	G	Gm28635	c.2439delT	p.Arg814fs	frameshift_variant	0.137 (8/57)
5	52420813	TTC	T	Ccdc149	c.274_275delGA	p.Glu92fs	frameshift_variant	0.124 (16/123)
12	117933779	GT	G	Dnah11	c.10714delA	p.Thr3572fs	frameshift_variant	0.118 (10/93)
2	25701080	AAC	A	Obp2a	c.225_226delCA	p.Asn75fs	frameshift_variant	0.101 (13/136)
5	26018487	TG	T	Gm5862	c.737delC	p.Pro246fs	frameshift_variant	0.093 (8/88)
18	77781022	GC	G	Atp5a1	c.1217delC	p.Pro406fs	frameshift_variant	0.093 (12/138)
4	144528884	TA	T	9430007A20Rik	c.877delA	p.Arg293fs	frameshift_variant	0.088 (9/108)
14	50393399	AT	A	Olfr736	c.649delT	p.Tyr217fs	frameshift_variant	0.082 (11/98)
1	85644666	C	CA	Sp140	c.1592dupA	p.Asn531fs	frameshift_variant	0.069 (13/185)
9	50866565	GGGTTC	G	Ppp2r1b	c.811_815delGTTCG	p.Val271fs	frameshift_variant	-
4	137604637	G	GA	Usp48	c.254dupA	p.Asn86fs	frameshift_variant&splice_region_variant	0.608 (60/97)
9	50873645	AG	A	Ppp2r1b	c.1340delG	p.Gly447fs	frameshift_variant&splice_region_variant	0.227 (34/147)
6	24954881	G	GT	Tmem229a	c.872dupA	p.Tyr291fs	frameshift_variant&stop_gained	0.528 (22/41)
8	75110119	G	GTGAA	Mcm5	c.199_202dupGAAT	p.Tyr68fs	frameshift_variant&stop_gained	-
19	34879721	G	T	Pank1-Kif20b	n.34879721G>T		intergenic_region	0.98 (61/62)
4	118708390	A	G	Olfr1342-Olfr1341	n.118708390A>G		intergenic_region	0.651 (68/104)
17	74017662	G	T	Gm24475-Srd5a2	n.74017662G>T		intergenic_region	0.594 (70/122)
11	99699562	T	G	Gm14190-Gm14186	n.99699562T>G		intergenic_region	0.579 (80/137)
X	54081610	G	T	Gm15482-Gm14644	n.54081610G>T		intergenic_region	0.576 (41/74)
4	128618650	G	T	Tlr12-Gm12958	n.128618650G>T		intergenic_region	0.571 (9/18)
8	104321546	C	A	RP23-247P3.6-Gm11020	n.104321546C>A		intergenic_region	0.541 (82/156)
2	87989877	T	C	Olfr74-Olfr1158	n.87989877T>C		intergenic_region	0.529 (14/26)
X	33234868	C	A	Gm2825-Spin2-ps6	n.33234868C>A		intergenic_region	0.5 (32/65)
8	67515610	C	A	Gm9755-Nat3	n.67515610C>A		intergenic_region	0.5 (32/64)
17	25368841	T	G	Tpsb2-Tpsg1	n.25368841T>G		intergenic_region	0.479 (101/208)
17	58410362	AT	A	Cntnap5c-Gm5815	n.58410363delT		intergenic_region	0.467 (16/34)
6	41458897	G	T	Gm10334-Prss1	n.41458897G>T		intergenic_region	0.466 (63/128)
3	138415453	C	G	Adh6-ps1-Adh4	n.138415453C>G		intergenic_region	0.46 (32/71)
10	121343581	A	C	Tbc1d30-Gns	n.121343581A>C		intergenic_region	0.444 (122/279)
17	24426676	G	T	Rnps1-Eci1	n.24426676G>T		intergenic_region	0.44 (14/31)
4	148674615	G	T	Gm572-Gm13203	n.148674615G>T		intergenic_region	0.44 (11/27)
9	7628225	C	A	Mmp27-Mmp20	n.7628225C>A		intergenic_region	0.435 (14/32)
12	114612240	G	T	Ighv1-10-Ighv1-11	n.114612240G>T		intergenic_region	0.432 (63/145)
13	21782934	C	G	Hist1h1b-Hist1h3i	n.21782934C>G		intergenic_region	0.404 (24/62)
14	52770418	G	T	Trav7d-4-Gm5408	n.52770418G>T		intergenic_region	0.394 (13/33)
4	103557021	G	T	Gm12720-Gm12715	n.103557021G>T		intergenic_region	0.384 (47/120)
14	54200381	A	C	Traj20-Traj19	n.54200381A>C		intergenic_region	0.358 (29/81)
12	115623600	A	G	Ighv1-69-Ighv8-12	n.115623600A>G		intergenic_region	0.352 (120/351)
5	29434658	T	A	4632411P08Rik-Nom1	n.29434658T>A		intergenic_region	0.341 (19/52)
13	62814265	C	A	Gm25448-Fbp2	n.62814265C>A		intergenic_region	0.34 (59/180)
10	71705893	C	T	Ipmk-Gm22937	n.71705893C>T		intergenic_region	0.333 (15/42)
7	103492887	G	C	Olfr609-Olfr610	n.103492887G>C		intergenic_region	0.314 (14/46)
10	23992398	C	A	Taar6-Taar7a	n.23992398C>A		intergenic_region	0.312 (56/182)
12	113717116	G	T	Ighv2-6-Gm37976	n.113717116G>T		intergenic_region	0.31 (65/219)
5	27856200	C	G	Htr5a-Gm43096	n.27856200C>G		intergenic_region	0.309 (44/143)
14	48881758	G	C	Otx2os1-Gm23470	n.48881758G>C		intergenic_region	0.308 (19/61)
16	59186485	C	A	Olfr197-Olfr198	n.59186485C>A		intergenic_region	0.301 (27/94)
12	84451498	G	T	Aldh6a1-Lin52	n.84451498G>T		intergenic_region	0.292 (40/129)
2	88392227	T	C	Olfr1178-Olfr1179	n.88392227T>C		intergenic_region	0.288 (20/69)
16	48057722	G	A	Gm25339-Gm7275	n.48057722G>A		intergenic_region	0.284 (38/123)
16	48057720	C	A	Gm25339-Gm7275	n.48057720C>A		intergenic_region	0.282 (38/119)
X	8690888	A	C	Ssxb8-Ssx9	n.8690888A>C		intergenic_region	0.277 (34/130)
12	54428166	C	A	Gm24692-Sptssa	n.54428166C>A		intergenic_region	0.27 (72/272)
16	45129694	G	C	Ccdc80-Slc35a5	n.45129694G>C		intergenic_region	0.268 (11/44)
12	88028296	A	C	Gm2056-Gm16368	n.88028296A>C		intergenic_region	0.256 (10/44)
3	92318085	GA	G	Sprr2b-Gm37428	n.92318086delA		intergenic_region	0.253 (31/116)
13	19257185	CT	C	Trgj3-Tcrg-C3	n.19257186delT		intergenic_region	0.25 (30/124)
5	13043506	C	A	Gm10481-Gm6641	n.13043506C>A		intergenic_region	0.248 (35/147)
2	87903678	T	G	Olfr1154-Olfr1155	n.87903678T>G		intergenic_region	0.24 (28/117)
9	78258763	T	A	Gsta1-Gm10639	n.78258763T>A		intergenic_region	0.232 (26/102)
11	51091864	TC	T	9230009I02Rik-Gm12202	n.51091865delC		intergenic_region	0.229 (22/106)
1	171515176	G	T	Alyref2-Gm9765	n.171515176G>T		intergenic_region	0.22 (16/74)
6	69992439	T	G	Igkv5-37-Igkv18-36	n.69992439T>G		intergenic_region	0.218 (22/99)
2	85886795	TA	T	Gm24037-Olfr1023	n.85886796delA		intergenic_region	0.212 (25/108)
2	36569540	G	C	Olfr344-Olfr345	n.36569540G>C		intergenic_region	0.212 (12/61)
3	92353462	AT	A	Sprr2e-Sprr2f	n.92353463delT		intergenic_region	0.206 (19/88)
10	81856485	G	T	Gm4767-Zfp781	n.81856485G>T		intergenic_region	0.172 (32/178)
12	21898916	T	G	Mrto4-ps2-Gm22908	n.21898916T>G		intergenic_region	0.126 (17/141)
4	145467929	A	G	Smarca5-ps-Gm13229	n.145467929A>G		intergenic_region	0.123 (19/152)
13	41912811	T	C	Gm22157-Gm28707	n.41912811T>C		intergenic_region	0.094 (15/129)
4	152087623	G	A	Plekhg5	n.152087623G>A		intragenic_variant	0.667 (14/21)
8	84918681	G	C	Dnase2a	n.84918681G>C		intragenic_variant	0.618 (27/44)
8	31958684	C	A	Nrg1	n.31958684G>T		intragenic_variant	0.614 (31/51)
4	134082660	C	A	Cd52	n.134082660G>T		intragenic_variant	0.6 (30/51)
15	82029213	A	C	Desi1	n.82029213T>G		intragenic_variant	0.577 (37/62)
4	41739546	C	A	Il11ra1	n.41739546C>A		intragenic_variant	0.56 (17/31)
10	69870987	C	T	Ank3	n.69870987C>T		intragenic_variant	0.556 (12/22)
10	69870985	C	G	Ank3	n.69870985C>G		intragenic_variant	0.526 (11/19)
10	69932474	T	G	Ank3	n.69932474T>G		intragenic_variant	0.52 (13/25)
9	31281550	ATG	A	Prdm10	n.31281558_31281559delGT		intragenic_variant	0.503 (85/164)
3	90019204	C	A	Gm19710	n.90019204C>A		intragenic_variant	0.5 (40/77)
3	98712222	C	T	Zfp697	n.98712222C>T		intragenic_variant	0.494 (152/304)
6	119183611	G	C	Cacna1c	n.119183611C>G		intragenic_variant	0.468 (31/73)
19	4745191	C	G	Gm21992	n.4745191G>C		intragenic_variant	0.462 (15/30)
7	121916579	C	A	Cog7	n.121916579G>T		intragenic_variant	0.459 (24/49)
5	123181475	C	A	Psmd9	n.123181475C>A		intragenic_variant	0.455 (33/68)
X	73255567	T	G	Xlr5a	n.73255567A>C		intragenic_variant	0.438 (92/213)
4	141821391	G	T	Ctrc	n.141821391C>A		intragenic_variant	0.436 (33/69)
6	42372157	G	T	2010310C07Rik	n.42372157G>T		intragenic_variant	0.435 (24/55)
12	117269549	G	T	Gm5441	n.117269549C>A		intragenic_variant	0.432 (23/54)
4	83459874	G	A	Snapc3	n.83459874G>A		intragenic_variant	0.423 (51/112)
3	138223731	G	A	0610031O16Rik	n.138223731C>T		intragenic_variant	0.422 (40/99)
16	4624906	C	A	Glis2	n.4624906C>A		intragenic_variant	0.421 (9/22)
7	130623370	G	A	Fgfr2	n.130623370C>T		intragenic_variant	0.406 (15/38)
13	102738460	C	G	Cd180	n.102738460C>G		intragenic_variant	0.406 (15/35)
17	14990592	C	A	Gm3448	n.14990592G>T		intragenic_variant	0.404 (48/117)
17	14990592	C	A	Ermard	n.14990592C>A		intragenic_variant	0.404 (48/117)
3	127816903	C	G	Tifa	n.127816903C>G		intragenic_variant	0.403 (38/96)
17	13527503	A	C	Tcte2	n.13527503T>G		intragenic_variant	0.4 (8/20)
11	12342531	A	G	Gm12002	n.12342531A>G		intragenic_variant	0.4 (18/49)
10	22288676	C	A	Raet1e	n.22288676C>A		intragenic_variant	0.4 (18/44)
10	22288678	C	A	Raet1e	n.22288678C>A		intragenic_variant	0.4 (17/44)
17	24182486	C	A	Tbc1d24	n.24182486G>T		intragenic_variant	0.395 (19/50)
2	109675279	G	A	Bdnf	n.109675279G>A		intragenic_variant	0.388 (23/61)
9	58117416	G	A	Stra6	n.58117416G>A		intragenic_variant	0.387 (12/32)
10	91153048	A	G	Tmpo	n.91153048T>C		intragenic_variant	0.375 (25/69)
5	105122822	CA	C	Gbp9	n.105122823delT		intragenic_variant	0.368 (22/65)
X	135842893	G	T	Bhlhb9	n.135842893G>T		intragenic_variant	0.362 (19/50)
7	102973685	G	T	Olfr576	n.102973685G>T		intragenic_variant	0.357 (12/31)
1	172293540	GC	G	Igsf8	n.172293550delC		intragenic_variant	0.348 (23/61)
16	91896304	A	C	Atp5o	n.91896304T>G		intragenic_variant	0.333 (29/93)
3	36018888	T	C	Mccc1os	n.36018888T>C		intragenic_variant	0.328 (23/69)
7	105668547	A	T	Timm10b	n.105668547A>T		intragenic_variant	0.319 (18/56)
7	131246722	G	T	Fgfr2	n.131246722C>A		intragenic_variant	0.283 (19/61)
1	5070114	G	T	Atp6v1h	n.5070114G>T		intragenic_variant	0.283 (15/49)
7	83652827	C	G	Stard5	n.83652827C>G		intragenic_variant	0.278 (26/91)
7	130744597	G	A	Fgfr2	n.130744597C>T		intragenic_variant	0.277 (15/51)
7	80306485	C	G	Rccd1	n.80306485G>C		intragenic_variant	0.275 (31/110)
1	85113523	G	T	C130026I21Rik	n.85113523C>A		intragenic_variant	0.275 (11/40)
1	85113522	G	T	C130026I21Rik	n.85113522C>A		intragenic_variant	0.275 (11/39)
6	139657318	C	T	Pik3c2g	n.139657318C>T		intragenic_variant	0.273 (30/113)
7	130504714	C	A	Fgfr2	n.130504714G>T		intragenic_variant	0.273 (13/53)
9	96752448	C	G	Zbtb38	n.96752448G>C		intragenic_variant	0.259 (9/31)
10	127841683	G	C	Rdh16	n.127841683G>C		intragenic_variant	0.259 (24/89)
5	140760553	T	A	Amz1	n.140760553T>A		intragenic_variant	0.25 (13/51)
1	171594060	G	T	Cd244	n.171594060G>T		intragenic_variant	0.248 (34/146)
11	105953090	T	G	Cyb561	n.105953090A>C		intragenic_variant	0.241 (8/36)
2	106004338	A	C	Dcdc5	n.106004338A>C		intragenic_variant	0.235 (17/75)
19	6538682	G	T	Nrxn2	n.6538682G>T		intragenic_variant	0.233 (11/53)
3	98743960	A	G	Zfp697	n.98743960A>G		intragenic_variant	0.23 (63/292)
11	81967670	T	G	Asic2	n.81967670A>C		intragenic_variant	0.227 (13/62)
2	101643259	C	A	B230118H07Rik	n.101643259G>T		intragenic_variant	0.221 (19/80)
10	5259280	T	G	Syne1	n.5259280A>C		intragenic_variant	0.217 (13/51)
6	139629685	CT	C	Pik3c2g	n.139629692delT		intragenic_variant	0.211 (23/92)
10	77055709	G	C	Slc19a1	n.77055709G>C		intragenic_variant	0.206 (11/43)
2	153781001	G	GT	Efcab8	n.153781001_153781002insT		intragenic_variant	0.196 (34/180)
11	58206705	A	AC	Irgm2	n.58206713dupC		intragenic_variant	0.196 (23/121)
11	108343459	G	T	Apoh	n.108343459G>T		intragenic_variant	0.194 (8/40)
11	67533127	G	A	Gas7	n.67533127G>A		intragenic_variant	0.192 (13/70)
7	131196474	AT	A	Fgfr2	n.131196475delA		intragenic_variant	0.192 (11/63)
2	105006753	T	A	Ccdc73	n.105006753T>A		intragenic_variant	0.19 (19/96)
1	88071535	C	G	Gm20528	n.88071535G>C		intragenic_variant	0.188 (65/363)
1	85113659	G	T	C130026I21Rik	n.85113659C>A		intragenic_variant	0.172 (29/147)
11	58207004	C	A	Irgm2	n.58207004C>A		intragenic_variant	0.172 (19/108)
9	120016880	G	T	Cx3cr1	n.120016880C>A		intragenic_variant	0.171 (8/45)
6	85817685	T	C	Nat8f6	n.85817685A>G		intragenic_variant	0.163 (8/57)
2	120062712	G	C	Sptbn5	n.120062712C>G		intragenic_variant	0.156 (15/99)
15	9149135	T	A	Skp2	n.9149135A>T		intragenic_variant	0.15 (21/128)
11	3227686	C	G	Drg1	n.3227686G>C		intragenic_variant	0.148 (10/69)
7	15397196	C	T	Obox1	n.15397196C>T		intragenic_variant	0.13 (33/256)
2	6934581	C	A	Celf2	n.6934581G>T		intragenic_variant	-
2	144491829	G	A	Zfp133-ps	n.144491829G>A		intragenic_variant	-
10	88459690	G	A	Chpt1	n.88459690C>T		intragenic_variant	-
19	40844984	G	T	Ccnj	c.580+25G>T		intron_variant	1.0 (87/87)
19	32620223	G	T	Papss2	c.33+37G>T		intron_variant	1.0 (52/52)
17	13368461	AT	A	Tcp10c	c.1056+261delT		intron_variant	1.0 (41/44)
19	40562890	C	A	Aldh18a1	c.1605+12G>T		intron_variant	1.0 (26/26)
19	37687104	G	C	Cyp26c1	c.430-15G>C		intron_variant	1.0 (13/13)
19	36879226	G	A	Tnks2	c.2359-9G>A		intron_variant	0.985 (88/89)
4	70354906	C	A	Cdk5rap2	c.660-31G>T		intron_variant	0.867 (15/17)
11	102310411	C	A	Ubtf	c.905+32G>T		intron_variant	0.863 (54/62)
4	141622163	C	A	Slc25a34	c.639+41G>T		intron_variant	0.833 (18/21)
11	72063264	T	C	Pitpnm3	c.1625-21A>G		intron_variant	0.833 (11/13)
15	47696626	C	A	Csmd3	c.7019+21G>T		intron_variant	0.824 (30/36)
19	10674818	C	G	Pga5	c.450+9G>C		intron_variant	0.813 (29/36)
4	41293902	C	G	Dcaf12	c.1203+31G>C		intron_variant	0.808 (25/30)
11	75503783	G	T	Prpf8	c.5505+38G>T		intron_variant	0.8 (58/76)
11	96934763	G	A	D030028A08Rik	n.625-4560G>A		intron_variant	0.791 (42/54)
15	81616689	T	G	Ep300	c.1626-37T>G		intron_variant	0.786 (61/79)
11	117739841	G	T	Tnrc6c	c.3533-26G>T		intron_variant	0.786 (24/30)
15	97016281	G	A	Slc38a4	c.211-38C>T		intron_variant	0.783 (41/53)
11	77854643	G	T	Myo18a	c.5984+752G>T		intron_variant	0.78 (46/60)
11	72722578	G	T	Ankfy1	c.323-50G>T		intron_variant	0.778 (40/51)
6	125603308	C	A	Vwf	c.1534-16C>A		intron_variant	0.778 (10/12)
19	10477171	G	T	Ppp1r32	c.948+34C>A		intron_variant	0.776 (39/52)
4	9430002	C	A	Clvs1	c.977+27C>A		intron_variant	0.767 (29/38)
11	114668875	CG	C	Rpl38	c.4-29delG		intron_variant	0.766 (59/79)
8	71714261	C	A	Fcho1	c.933+11G>T		intron_variant	0.765 (16/22)
19	11283628	A	T	4930526L06Rik	n.149-9012A>T		intron_variant	0.765 (108/141)
19	11283628	A	T	Ms4a5	c.153+13T>A		intron_variant	0.765 (108/141)
11	116749674	C	A	Gm11735	n.116+44G>T		intron_variant	0.756 (71/97)
11	95873845	G	T	B4galnt2	c.778+17C>A		intron_variant	0.753 (75/96)
19	10186928	G	C	Fads1	c.753+45G>C		intron_variant	0.75 (39/52)
11	116055040	T	C	Unk	c.1546+29T>C		intron_variant	0.75 (19/24)
6	137778105	G	T	Dera	c.32-19G>T		intron_variant	0.75 (12/17)
4	59911799	T	A	Slc46a2	c.1373+39A>T		intron_variant	0.741 (23/31)
4	133268388	C	T	Tmem222	c.408+21G>A		intron_variant	0.739 (22/29)
11	115849894	G	T	Llgl2	c.1322+16G>T		intron_variant	0.733 (25/36)
4	154341786	C	A	B230104I21Rik	c.85+474C>A		intron_variant	0.733 (23/31)
11	117834966	G	A	Gm20708	c.331+2390G>A		intron_variant	0.732 (67/86)
11	118320071	C	T	Timp2	c.231+38G>A		intron_variant	0.732 (64/87)
8	24715137	AT	A	Adam3	c.354-24delA		intron_variant	0.726 (82/109)
15	44596848	A	G	Pkhd1l1	c.12482-30A>G		intron_variant	0.726 (60/89)
11	100905549	G	C	Stat3	c.550+44C>G		intron_variant	0.722 (34/47)
11	98912131	G	T	Cdc6	c.924-28G>T		intron_variant	0.722 (102/144)
11	97346431	ATG	A	Gpr179	c.1227+34_1227+35delCA		intron_variant	0.721 (40/55)
11	115863081	C	A	Myo15b	c.2542-30C>A		intron_variant	0.721 (37/50)
8	54601978	T	A	Spata4	c.345+47T>A		intron_variant	0.714 (61/87)
16	11147254	C	A	Zc3h7a	c.1999+15G>T		intron_variant	0.714 (10/14)
11	99420761	C	A	A830036E02Rik	n.2179+632C>A		intron_variant	0.709 (48/69)
11	67207388	C	A	Myh1	c.1417-32C>A		intron_variant	0.706 (67/96)
11	69228584	G	C	Gucy2e	c.1759-16C>G		intron_variant	0.706 (14/20)
7	134918706	G	T	Dock1	c.2784+42391G>T		intron_variant	0.704 (23/32)
11	115880518	G	T	Myo15b	c.5042+10G>T		intron_variant	0.7 (27/37)
8	91800742	G	T	Irx3os	n.124+204G>T		intron_variant	0.7 (23/35)
19	4602898	C	A	Pcx	c.754+23C>A		intron_variant	0.7 (18/25)
4	126034368	G	T	Csf3r	c.846+29G>T		intron_variant	0.7 (15/21)
11	66926673	G	T	Gm12298	n.547+14039C>A		intron_variant	0.697 (51/76)
2	127638545	C	G	Mal	c.387+44G>C		intron_variant	0.697 (28/42)
11	62378490	C	G	Ncor1	c.2055+25G>C		intron_variant	0.696 (53/75)
10	50699918	G	T	Ascc3	c.2290-22G>T		intron_variant	0.692 (11/15)
19	10899444	G	T	Prpf19	c.582+12G>T		intron_variant	0.684 (43/63)
8	109908993	A	T	Phlpp2	c.832-40A>T		intron_variant	0.684 (14/21)
19	40951034	C	A	Blnk	c.608-9G>T		intron_variant	0.682 (65/95)
4	152507537	G	T	Nphp4	c.1122+54G>T		intron_variant	0.682 (16/25)
11	103210705	G	T	Spata32	c.68+33C>A		intron_variant	0.68 (23/35)
19	48683528	G	T	Sorcs3	c.1204-39G>T		intron_variant	0.675 (62/93)
4	49702884	C	A	Grin3a	c.2615-14G>T		intron_variant	0.673 (45/64)
11	67173396	C	A	Myh2	c.205-29C>A		intron_variant	0.67 (87/128)
11	96913068	C	G	Cdk5rap3	c.286-14G>C		intron_variant	0.667 (32/46)
11	49957304	G	T	Rasgef1c	c.187-59G>T		intron_variant	0.667 (25/37)
8	110631993	G	T	Vac14	c.105-37G>T		intron_variant	0.667 (25/36)
12	20815149	C	A	1700030C10Rik	n.434+197G>T		intron_variant	0.667 (19/30)
11	45954357	C	A	Thg1l	c.192-125G>T		intron_variant	0.667 (11/18)
4	66266400	G	C	Astn2	c.479-20C>G		intron_variant	0.667 (10/16)
11	69451120	G	T	Dnah2os	n.73-1770G>T		intron_variant	0.661 (45/70)
11	100706063	C	A	Kat2a	c.2113+20G>T		intron_variant	0.661 (45/68)
4	123322538	G	T	Bmp8a	c.664+2023C>A		intron_variant	0.655 (19/29)
X	73900200	G	T	Arhgap4	c.1390-17C>A		intron_variant	0.65 (17/26)
4	6271295	C	A	Cyp7a1	c.909-49G>T		intron_variant	0.647 (13/21)
12	25041216	G	T	Kidins220	c.3532-30G>T		intron_variant	0.644 (85/136)
4	43161439	T	A	Unc13b	c.527-4305T>A		intron_variant	0.64 (42/63)
12	20815148	C	CG	1700030C10Rik	n.434+197_434+198insC		intron_variant	0.64 (19/29)
8	123982663	C	A	Gm20388	c.22-312695C>A		intron_variant	0.636 (9/14)
4	119421551	C	A	Ppcs	c.612+29G>T		intron_variant	0.636 (25/37)
11	98357000	C	A	Ppp1r1b	c.548-33C>A		intron_variant	0.636 (17/26)
11	98357000	C	A	1700003D09Rik	n.47+1237G>T		intron_variant	0.636 (17/26)
8	70837378	A	C	Arrdc2	c.593-12T>G		intron_variant	0.635 (57/89)
4	46542225	C	A	Coro2a	c.1137+10G>T		intron_variant	0.634 (32/51)
4	46510418	T	A	Trim14	c.787+19A>T		intron_variant	0.625 (16/26)
6	32181943	G	T	Plxna4	c.4351-9C>A		intron_variant	0.625 (12/19)
X	53020296	G	T	Hprt	c.533-27G>T		intron_variant	0.625 (11/17)
4	119132090	A	T	Slc2a1	c.115-33A>T		intron_variant	0.625 (10/16)
11	24172654	G	T	4930538E20Rik	n.159+12C>A		intron_variant	0.621 (41/65)
4	118387930	C	A	Szt2	c.3431-23G>T		intron_variant	0.619 (28/49)
11	34087254	C	A	4930469K13Rik	n.221+4306G>T		intron_variant	0.617 (38/61)
2	122296302	AC	A	Duox2	c.715+15delG		intron_variant	0.615 (9/15)
4	24632584	C	A	Klhl32	c.1413+59G>T		intron_variant	0.615 (30/46)
X	13845979	C	A	Cask	c.59+29G>T		intron_variant	0.615 (11/17)
4	106463643	C	T	Pcsk9	c.216+52G>A		intron_variant	0.614 (32/53)
4	155946445	TG	T	Ube2j2	c.36+38delG		intron_variant	0.613 (22/37)
8	109656086	AT	A	Pkd1l3	c.5018-15delT		intron_variant	0.613 (21/37)
19	39093313	T	A	Cyp2c65	c.1292-10T>A		intron_variant	0.612 (61/100)
11	58384578	G	T	Lypd8	c.170-32G>T		intron_variant	0.611 (30/44)
13	24022670	C	T	Lrrc16a	c.3851-34G>A		intron_variant	0.611 (13/21)
16	33091377	G	T	Lmln	c.1199+15G>T		intron_variant	0.608 (49/83)
16	33091377	G	T	Gm17106	n.147+17078C>A		intron_variant	0.608 (49/83)
17	85046578	C	A	Slc3a1	c.889-61C>A		intron_variant	0.604 (33/54)
6	50650953	A	T	Npvf	c.516-31T>A		intron_variant	0.6 (46/77)
11	3135892	C	A	Sfi1	c.2493+51G>T		intron_variant	0.6 (32/52)
11	100759519	G	T	Kcnh4	c.76+11C>A		intron_variant	0.6 (22/38)
8	105959542	C	A	Slc12a4	c.217-53G>T		intron_variant	0.6 (15/25)
11	95055662	G	T	Itga3	c.2303+34C>A		intron_variant	0.6 (13/21)
11	19014317	C	A	Gm16141	n.182-229C>A		intron_variant	0.6 (10/17)
8	84086210	G	T	Rfx1	c.902+543G>T		intron_variant	0.594 (51/88)
17	57296783	C	A	Vav1	c.449+15C>A		intron_variant	0.593 (40/68)
4	139347897	C	A	Mrto4	c.570+24G>T		intron_variant	0.593 (18/32)
11	77467865	AC	A	Coro6	c.754-398delC		intron_variant	0.591 (17/31)
2	25081785	C	A	Entpd8	c.-11-26C>A		intron_variant	0.591 (13/22)
3	108044312	C	A	Gstm4	c.112+41G>T		intron_variant	0.59 (62/103)
11	82764065	C	A	Cct6b	c.137+26G>T		intron_variant	0.588 (12/20)
8	86557581	C	A	Abcc12	c.982+16G>T		intron_variant	0.586 (59/105)
X	138208565	G	A	Il1rapl2	c.357-11820G>A		intron_variant	0.585 (25/44)
4	133190100	A	T	Wasf2	c.538-29A>T		intron_variant	0.583 (8/13)
4	130073183	G	T	Col16a1	c.2701-57G>T		intron_variant	0.583 (25/43)
16	33057087	G	T	Rpl35a	c.-32-49G>T		intron_variant	0.581 (66/121)
16	33057087	G	T	Gm17106	n.147+51368C>A		intron_variant	0.581 (66/121)
11	44549021	G	T	Rnf145	c.621+22G>T		intron_variant	0.579 (26/45)
11	48945834	C	A	Gm12185	c.-22-29450G>T		intron_variant	0.578 (84/145)
11	3537271	C	A	Smtn	c.51+52G>T		intron_variant	0.576 (39/68)
8	122271380	G	A	Gm20388	c.22-2023978G>A		intron_variant	0.575 (31/54)
4	138305073	G	T	Ddost	c.160+35G>T		intron_variant	0.571 (8/15)
8	99147093	T	A	Cdh8	c.1414+24173A>T		intron_variant	0.571 (60/108)
11	118333873	T	G	Timp2	c.131-13664A>C		intron_variant	0.571 (18/33)
4	130327183	C	A	Zcchc17	c.564+10G>T		intron_variant	0.57 (54/94)
4	155715619	G	T	Ssu72	c.224+14G>T		intron_variant	0.567 (42/69)
4	155715618	T	C	Ssu72	c.224+13T>C		intron_variant	0.567 (41/68)
4	58111485	G	T	Svep1	c.3158-25C>A		intron_variant	0.567 (18/34)
8	104291138	T	A	Cmtm2a	c.318+1500A>T		intron_variant	0.566 (57/102)
8	104291138	T	A	Cmtm1	c.*247+1500A>T		intron_variant	0.566 (57/102)
4	118835994	C	A	Olfr1333	c.7+60G>T		intron_variant	0.565 (93/162)
2	30336292	C	T	Nup188	c.3352-32C>T		intron_variant	0.565 (49/84)
17	29252230	C	A	Ppil1	c.280+20G>T		intron_variant	0.565 (15/26)
17	34732144	C	A	C4b	c.4125+26G>T		intron_variant	0.564 (23/42)
8	105290209	C	A	Exoc3l	c.2030+23G>T		intron_variant	0.563 (10/20)
7	101913426	G	T	Lrrc51	c.437+9C>A		intron_variant	0.556 (19/32)
11	67361441	C	A	Myh13	c.4365+9C>A		intron_variant	0.556 (13/23)
11	6397311	G	T	Zmiz2	c.813+22G>T		intron_variant	0.556 (10/19)
3	102934758	T	A	Sycp1	c.181+51A>T		intron_variant	0.554 (74/138)
8	105290794	G	T	RP23-127B8.7	n.575-110G>T		intron_variant	0.553 (29/55)
8	45790025	G	T	Sorbs2os	n.193+29080C>A		intron_variant	0.55 (68/124)
1	192137503	C	G	Gm10516	n.166+442C>G		intron_variant	0.55 (14/24)
1	192137503	C	G	Rcor3	c.161-14G>C		intron_variant	0.55 (14/24)
17	57063609	AT	A	Crb3	c.74-18delT		intron_variant	0.548 (23/39)
18	42252508	C	A	Lars	c.132-1128G>T		intron_variant	0.547 (118/218)
11	46536392	C	A	Gm12169	c.548-17C>A		intron_variant	0.546 (144/265)
3	130589940	G	T	Col25a1	c.1882-20G>T		intron_variant	0.545 (76/145)
6	83199302	G	T	Dctn1	c.3708+25G>T		intron_variant	0.545 (13/29)
8	93036085	C	A	RP23-279O5.2	n.418+2700C>A		intron_variant	0.544 (79/145)
11	115877584	T	A	Myo15b	c.4219-161T>A		intron_variant	0.543 (29/55)
8	121923499	T	A	Car5a	c.600+56A>T		intron_variant	0.542 (28/54)
8	121923499	T	A	Gm20388	c.21+2012560T>A		intron_variant	0.542 (28/54)
17	25817011	G	C	Gm26694	n.1888+20230G>C		intron_variant	0.538 (24/46)
11	51551105	G	C	Col23a1	c.436-29G>C		intron_variant	0.537 (29/53)
17	25860496	C	G	Gm26694	n.1888+63715C>G		intron_variant	0.536 (15/30)
17	71700470	C	A	Fam179a	c.1048-35C>A		intron_variant	0.534 (39/74)
8	94505404	C	A	Nlrc5	c.3915-58C>A		intron_variant	0.532 (29/53)
4	43664208	G	T	Fam221b	c.997+1252C>A		intron_variant	0.529 (9/17)
19	57043084	T	C	Ablim1	c.2183-23A>G		intron_variant	0.529 (21/40)
10	117629689	G	T	Cpm	c.-3-32G>T		intron_variant	0.529 (12/23)
12	4865344	C	T	Mfsd2b	c.1284-31G>A		intron_variant	0.529 (12/20)
17	73916778	C	A	Xdh	c.1608+10G>T		intron_variant	0.529 (10/20)
17	71361841	C	A	Gm26561	n.185-30215C>A		intron_variant	0.528 (54/109)
2	106384278	CT	C	Dcdc5	n.4780+44delT		intron_variant	0.527 (36/71)
17	56608837	C	G	2410015M20Rik	c.207+9G>C		intron_variant	0.526 (13/22)
3	94389641	G	T	Rorc	c.927+45G>T		intron_variant	0.526 (12/22)
17	43599157	G	C	Pla2g7	c.536+15G>C		intron_variant	0.524 (92/175)
X	129960204	T	A	Diaph2	c.1453+42T>A		intron_variant	0.523 (28/53)
12	37243671	A	C	Agmo	c.127-35A>C		intron_variant	0.522 (15/29)
4	156014204	G	T	Tnfrsf4	c.134-24G>T		intron_variant	0.522 (15/27)
11	61707470	C	A	Slc5a10	c.846+324G>T		intron_variant	0.522 (13/24)
8	119752909	C	T	Atp2c2	c.2211-35C>T		intron_variant	0.521 (28/55)
11	36273195	C	G	Tenm2	c.1186+36G>C		intron_variant	0.519 (19/38)
6	55874764	G	T	Ccdc129	c.256+29G>T		intron_variant	0.517 (87/163)
19	4106975	G	T	Pitpnm1	c.1484+13G>T		intron_variant	0.517 (17/33)
4	129600575	C	A	Eif3i	c.3+19G>T		intron_variant	0.517 (17/33)
8	123284200	G	A	Fanca	c.2584-15C>T		intron_variant	0.517 (17/31)
8	123284200	G	A	Gm20388	c.22-1011158G>A		intron_variant	0.517 (17/31)
4	154263372	C	A	Megf6	c.2453-21C>A		intron_variant	0.516 (19/38)
6	24570563	G	T	Asb15	c.1595-56G>T		intron_variant	0.515 (41/81)
3	88351594	A	T	Smg5	c.1858+13A>T		intron_variant	0.514 (46/91)
4	113875945	A	C	Skint5	c.1219+41T>G		intron_variant	0.512 (75/146)
4	116991312	C	A	Urod	c.876-14G>T		intron_variant	0.509 (28/60)
3	122156443	C	A	Gm43158	n.1493-31275G>T		intron_variant	0.508 (77/158)
6	50574021	G	T	5430402O13Rik	n.380+6999G>T		intron_variant	0.507 (93/182)
8	122358795	G	T	Gm20388	c.22-1936563G>T		intron_variant	0.507 (42/82)
8	123997362	C	A	Gm20388	c.22-297996C>A		intron_variant	0.506 (52/110)
18	57287743	C	A	Megf10	c.2492-40C>A		intron_variant	0.5 (9/21)
17	31094599	C	G	Abcg1	c.405-47C>G		intron_variant	0.5 (9/19)
4	134245282	C	T	Zfp593	c.200+22G>A		intron_variant	0.5 (9/19)
10	128545569	G	T	Zc3h10	c.-52-31C>A		intron_variant	0.5 (9/18)
19	5609997	C	A	Kat5	c.12+21G>T		intron_variant	0.5 (8/15)
19	5466169	G	T	Ctsw	c.614-24C>A		intron_variant	0.5 (47/95)
2	122600842	A	G	Gatm	c.676-13T>C		intron_variant	0.5 (37/78)
2	22396187	A	T	Myo3a	c.1801-35A>T		intron_variant	0.5 (32/63)
4	147927940	G	T	Plod1	c.646+518C>A		intron_variant	0.5 (28/53)
6	118089521	G	A	Rasgef1a	c.1472+14G>A		intron_variant	0.5 (25/47)
6	89321052	C	A	Gm26811	n.322-1406C>A		intron_variant	0.5 (19/39)
17	11303745	G	T	Park2	c.531+34G>T		intron_variant	0.5 (18/35)
8	122456436	T	C	Gm20388	c.22-1838922T>C		intron_variant	0.5 (18/34)
6	120959061	C	A	Gm43915	n.130+88C>A		intron_variant	0.5 (16/32)
4	106709748	AG	A	Mroh7	c.1335-33delC		intron_variant	0.5 (15/32)
10	79854727	T	A	E130317F20Rik	n.134+96A>T		intron_variant	0.5 (14/27)
2	76706654	T	G	Ttn	c.104886+43A>C		intron_variant	0.5 (12/26)
2	118775829	GCCCCC	G	Phgr1	c.18+54_18+58delCCCCC		intron_variant	0.5 (12/16)
8	112841884	C	T	Cntnap4	c.2542+9C>T		intron_variant	0.49 (25/52)
5	107426820	C	A	Gm17202	n.160+2972G>T		intron_variant	0.488 (26/54)
10	116828942	G	T	Myrfl	c.1167+15C>A		intron_variant	0.487 (42/85)
6	6879489	C	T	Dlx5	c.540+37G>A		intron_variant	0.486 (22/44)
3	94402239	G	C	Gm43401	n.79+531C>G		intron_variant	0.485 (19/39)
X	10208835	C	T	Rpgr	c.584-13G>A		intron_variant	0.484 (20/39)
2	70591095	T	C	Gad1	c.1117-11T>C		intron_variant	0.483 (40/87)
3	154264079	G	C	Slc44a5	c.1855+17G>C		intron_variant	0.481 (46/94)
14	32463122	C	A	Chat	c.-227-2209G>T		intron_variant	0.481 (16/32)
X	100638636	T	G	Kif4	c.687-41T>G		intron_variant	0.48 (12/27)
6	101151999	T	A	Gm43948	n.310+15175T>A		intron_variant	0.479 (25/56)
17	34819987	C	T	C4a	n.1215-25G>A		intron_variant	0.478 (26/57)
4	150158686	C	A	Slc2a7	c.942+21C>A		intron_variant	0.478 (12/24)
19	42263282	C	T	Golga7b	c.13-47C>T		intron_variant	0.476 (12/25)
16	97567552	G	T	Tmprss2	c.1308+44C>A		intron_variant	0.476 (12/24)
17	64675047	G	T	Man2a1	c.1575-18G>T		intron_variant	0.475 (26/53)
5	65335454	C	G	Rfc1	c.3+70G>C		intron_variant	0.474 (10/20)
16	45808098	C	A	Phldb2	c.1707+28G>T		intron_variant	0.472 (29/64)
11	48849893	G	T	Gm16170	n.764-1304C>A		intron_variant	0.472 (29/59)
17	35159431	C	T	Prrc2a	c.1285-18G>A		intron_variant	0.472 (23/46)
13	20287859	T	C	Elmo1	c.832-32T>C		intron_variant	0.471 (8/17)
6	117935835	G	A	Fxyd4	c.40+19C>T		intron_variant	0.471 (11/22)
6	119183611	G	C	Dcp1b	c.192-39G>C		intron_variant	0.468 (31/73)
8	70141971	C	G	Borcs8	c.-23+2199C>G		intron_variant	0.467 (8/17)
X	49496625	GA	G	Arhgap36	c.919+42delA		intron_variant	0.467 (8/17)
1	46175902	T	C	Dnah7b	c.3404+422T>C		intron_variant	0.467 (36/74)
12	113259197	A	T	Igha	c.638-35T>A		intron_variant	0.467 (18/36)
11	5639062	A	C	Ankrd36	c.3124-38A>C		intron_variant	0.467 (15/35)
17	24042041	T	G	Prss27	c.56-13T>G		intron_variant	0.465 (48/99)
17	24042043	C	G	Prss27	c.56-11C>G		intron_variant	0.465 (47/98)
17	30774923	G	T	Dnah8	c.10036-23G>T		intron_variant	0.464 (15/33)
X	8523320	G	T	Gm14459	c.351+58C>A		intron_variant	0.462 (56/128)
7	38520007	C	A	Gm29087	n.290-8811C>A		intron_variant	0.462 (33/71)
3	85673201	G	T	Gm37240	c.-228+112017C>A		intron_variant	0.462 (21/45)
12	21112214	G	C	Gm21989	n.1275+26429G>C		intron_variant	0.46 (33/72)
12	21112214	G	C	Asap2	c.126+45G>C		intron_variant	0.46 (33/72)
12	104412297	G	A	Serpina3n	c.912-37G>A		intron_variant	0.46 (31/67)
6	48590309	C	A	Gm45021	c.-52+228C>A		intron_variant	0.459 (35/74)
5	116453419	T	A	Srrm4os	n.188-8305T>A		intron_variant	0.457 (20/43)
5	32328508	C	G	Gm36840	n.135-7629G>C		intron_variant	0.456 (35/81)
5	32328508	C	G	Plb1	c.2619+16C>G		intron_variant	0.456 (35/81)
3	130575423	C	A	Col25a1	c.1692+13C>A		intron_variant	0.456 (30/64)
5	123181475	C	A	Gm26745	n.1849+47548G>T		intron_variant	0.455 (33/68)
6	48724153	C	A	Gm28053	c.-103-5068C>A		intron_variant	0.455 (28/58)
13	91983746	C	A	Rasgrf2	c.1836-45G>T		intron_variant	0.455 (19/42)
13	48665366	C	G	Barx1	c.516-35C>G		intron_variant	0.455 (15/36)
17	32033241	A	T	Hsf2bp	c.199+20T>A		intron_variant	0.455 (13/27)
14	121953986	G	T	Ubac2	c.390-19623G>T		intron_variant	0.455 (11/25)
X	7421106	A	T	2010204K13Rik	n.458+3024T>A		intron_variant	0.453 (33/76)
4	43261043	G	A	Unc13b	c.12635-639G>A		intron_variant	0.45 (24/51)
5	30922017	C	G	Khk	c.92+10C>G		intron_variant	0.45 (11/25)
5	45687255	A	T	Ncapg	c.1648-57A>T		intron_variant	0.449 (56/122)
10	3940746	C	T	Plekhg1	c.1446+20C>T		intron_variant	0.448 (36/83)
8	122650370	G	T	Gm20388	c.22-1644988G>T		intron_variant	0.446 (25/59)
6	47954561	G	A	Zfp956	c.24+979G>A		intron_variant	0.444 (35/69)
3	136254840	C	A	Bank1	c.621+33G>T		intron_variant	0.444 (17/39)
5	106635744	C	A	Gm28039	n.41-16102G>T		intron_variant	0.442 (42/93)
4	155466171	C	A	Cfap74	c.4636-133C>A		intron_variant	0.441 (18/40)
3	149336694	G	A	Gm30382	n.201-21873C>T		intron_variant	0.44 (40/94)
3	149336694	G	A	Gm42649	n.240+24G>A		intron_variant	0.44 (40/94)
17	32060333	T	G	Rrp1b	c.1982-15T>G		intron_variant	0.44 (15/31)
5	123163754	G	T	Gm26745	n.1849+65269C>A		intron_variant	0.439 (23/53)
5	123163754	G	T	Setd1b	c.5784+46G>T		intron_variant	0.439 (23/53)
9	26853595	C	A	Glb1l3	c.494+25G>T		intron_variant	0.438 (9/22)
18	20692372	A	G	B4galt6	c.776+20T>C		intron_variant	0.438 (9/18)
4	154023653	G	C	Smim1	c.110+35C>G		intron_variant	0.438 (16/35)
16	8691513	C	A	Usp7	c.3162+43G>T		intron_variant	0.436 (26/59)
9	66863400	ATT	A	Rab8b	c.185+21_185+22delAA		intron_variant	0.435 (26/60)
6	42372157	G	T	Epha1	c.153+18C>A		intron_variant	0.435 (24/55)
14	66828752	C	G	Dpysl2	c.690+19G>C		intron_variant	0.435 (11/29)
4	43005160	G	A	Fancg	c.1158+51C>T		intron_variant	0.435 (11/26)
18	21552687	C	A	Klhl14	c.1753-45G>T		intron_variant	0.435 (10/25)
4	148667447	G	T	Gm572	c.757+11G>T		intron_variant	0.435 (10/23)
3	90001817	C	T	Ubap2l	c.3243+462G>A		intron_variant	0.434 (63/144)
12	117269549	G	T	Ptprn2	c.2861-28G>T		intron_variant	0.432 (23/54)
6	17281433	G	T	Gm15581	n.140-66360C>A		intron_variant	0.431 (24/55)
14	56159448	T	G	Gzmg	c.55+22A>C		intron_variant	0.43 (39/88)
12	40790041	G	T	Dock4	c.3316-35G>T		intron_variant	0.429 (37/88)
3	121773977	C	A	Abcd3	c.1322+12G>T		intron_variant	0.429 (35/78)
14	56156863	G	T	Gzmg	c.604-31C>A		intron_variant	0.429 (31/75)
8	61104084	T	G	Nek1	c.2741-29T>G		intron_variant	0.427 (39/93)
9	7120966	G	A	Dync2h1	c.6348-28C>T		intron_variant	0.425 (20/46)
6	48468426	C	T	Sspo	c.6831-31C>T		intron_variant	0.425 (19/49)
4	155872826	A	C	Cpsf3l	c.127-24A>C		intron_variant	0.424 (45/110)
5	103965911	A	G	Hsd17b13	c.696-20T>C		intron_variant	0.424 (27/65)
9	82974617	T	A	Phip	c.189+57A>T		intron_variant	0.424 (16/39)
6	41613687	G	T	Ephb6	c.104-65G>T		intron_variant	0.422 (48/112)
11	103070817	G	A	Gm26668	n.3569-5020G>A		intron_variant	0.422 (21/49)
19	46003688	G	C	4930505N22Rik	n.583+4969G>C		intron_variant	0.421 (9/27)
1	136219783	C	A	Gm26568	n.173+3537C>A		intron_variant	0.421 (9/20)
16	5199774	C	T	Nagpa	c.795-30G>A		intron_variant	0.421 (18/50)
9	62849064	A	C	Cln6	c.534-45A>C		intron_variant	0.421 (11/24)
9	62849064	A	C	Gm10653	n.296+1557T>G		intron_variant	0.421 (11/24)
1	32657415	G	T	Khdrbs2	c.953-29G>T		intron_variant	0.421 (10/23)
12	113611499	C	G	Ighv2-3	c.47-12G>C		intron_variant	0.42 (98/235)
8	27447954	G	T	RP23-202K1.1	c.-28-22G>T		intron_variant	0.419 (44/105)
10	75180286	G	T	Bcr	c.3454+28G>T		intron_variant	0.419 (15/39)
10	119942811	C	A	Grip1	c.503-51C>A		intron_variant	0.419 (14/34)
7	38528104	C	A	Gm29087	n.290-714C>A		intron_variant	0.417 (52/137)
13	54734126	C	G	Cdhr2	c.3409-21C>G		intron_variant	0.417 (15/36)
1	133066553	C	A	Gm28609	n.141-651G>T		intron_variant	0.417 (11/26)
12	113611501	A	C	Ighv2-3	c.47-14T>G		intron_variant	0.415 (98/234)
17	30672402	G	T	Dnah8	c.2337+43G>T		intron_variant	0.415 (26/63)
4	110660839	T	A	Agbl4	c.282+80664T>A		intron_variant	0.414 (30/72)
10	60403485	C	A	Cdh23	c.3369+2800G>T		intron_variant	0.413 (24/56)
2	114051997	C	A	A530058N18Rik	n.454-5087C>A		intron_variant	0.412 (9/20)
10	34395178	C	A	Nt5dc1	c.559+2936G>T		intron_variant	0.412 (8/22)
6	73033510	T	C	Dnah6	c.11317+22A>G		intron_variant	0.412 (39/92)
7	16077940	C	T	Zfp541	c.549-32C>T		intron_variant	0.412 (19/44)
17	25147802	A	T	Clcn7	c.669+12A>T		intron_variant	0.412 (16/38)
18	37443235	C	A	Gm42416	c.2386-381786C>A		intron_variant	0.41 (18/44)
18	37443235	C	A	Gm37013	c.223-381786C>A		intron_variant	0.41 (18/44)
18	37443235	C	A	Gm37388	c.337-381786C>A		intron_variant	0.41 (18/44)
11	70719103	AG	A	Kif1c	c.1666+16delG		intron_variant	0.409 (11/28)
7	30463683	G	T	Nphs1	c.1357+27G>T		intron_variant	0.407 (17/35)
7	30463683	G	T	Nphs1os	n.144-41C>A		intron_variant	0.407 (17/35)
7	119471519	G	C	Umod	c.1186-37C>G		intron_variant	0.406 (32/78)
7	119471519	G	C	Gm44588	n.392+43G>C		intron_variant	0.406 (32/78)
7	27446073	G	T	Sptbn4	c.-16+390C>A		intron_variant	0.406 (30/70)
12	29851505	C	A	Myt1l	c.2287-29C>A		intron_variant	0.406 (16/40)
17	71122498	A	C	Myom1	c.4655-59A>C		intron_variant	0.405 (38/97)
17	71122498	A	C	Gm26561	n.184+17893A>C		intron_variant	0.405 (38/97)
10	64089355	C	A	Ctnna3	c.1048-161343C>A		intron_variant	0.404 (22/53)
5	137809990	T	A	Zcwpw1	c.725-26T>A		intron_variant	0.402 (53/121)
4	139420588	G	T	Ubr4	c.4953+18G>T		intron_variant	0.4 (9/20)
19	4872206	C	A	Actn3	c.379+33G>T		intron_variant	0.4 (37/89)
3	137422327	T	G	Emcn	c.689+45T>G		intron_variant	0.4 (27/69)
11	12342531	A	G	Cobl	c.1032+1213T>C		intron_variant	0.4 (18/49)
7	80247247	G	T	Ttll13	c.-11-37G>T		intron_variant	0.4 (18/45)
10	22288676	C	A	H60b	c.722-39C>A		intron_variant	0.4 (18/44)
10	22288676	C	A	Gm26740	n.423+13737G>T		intron_variant	0.4 (18/44)
10	22288678	C	A	H60b	c.722-37C>A		intron_variant	0.4 (17/44)
10	22288678	C	A	Gm26740	n.423+13735G>T		intron_variant	0.4 (17/44)
10	88522373	A	C	Mybpc1	c.3319+594T>G		intron_variant	0.4 (11/28)
9	21804582	T	A	Dock6	c.5427+28A>T		intron_variant	0.4 (10/23)
18	21077059	C	A	Mep1b	c.174+672C>A		intron_variant	0.395 (36/91)
17	24182486	C	A	Gm43796	c.965+2718G>T		intron_variant	0.395 (19/50)
7	100292730	G	C	P4ha3	c.337+12G>C		intron_variant	0.395 (19/44)
2	112801462	GC	G	Ryr3	c.6307-31delG		intron_variant	0.394 (15/38)
9	105439331	T	A	Atp2c1	c.1512+10A>T		intron_variant	0.393 (49/136)
11	11945447	C	G	Grb10	c.993+48G>C		intron_variant	0.393 (16/38)
X	69523583	T	G	Aff2	c.180+15T>G		intron_variant	0.393 (15/35)
2	27104717	G	C	Adamtsl2	c.2434-32G>C		intron_variant	0.393 (14/35)
4	133533395	C	A	Nudc	c.828+11G>T		intron_variant	0.391 (32/79)
17	20113393	C	A	Vmn2r-ps126	n.968-27699C>A		intron_variant	0.39 (79/196)
4	101940723	G	T	Gm12794	c.287+30G>T		intron_variant	0.39 (68/178)
5	124127160	C	A	Pitpnm2	c.2362+17G>T		intron_variant	0.39 (20/51)
6	125278393	C	T	4930417O13Rik	n.1792-7227C>T		intron_variant	0.389 (26/65)
5	144996951	C	A	Kpna7	c.957+37G>T		intron_variant	0.389 (22/59)
5	147029056	T	A	Lnx2	c.1221+31A>T		intron_variant	0.389 (14/42)
16	17293826	C	A	Pi4ka	c.4767+17G>T		intron_variant	0.387 (14/38)
7	125468258	A	C	Nsmce1	c.763+21T>G		intron_variant	0.387 (13/36)
14	52160077	C	G	Rpgrip1	c.3884-29C>G		intron_variant	0.387 (13/35)
4	99031403	C	A	Dock7	c.1683-7944G>T		intron_variant	0.385 (35/95)
10	128326974	G	T	Cnpy2	c.506-44G>T		intron_variant	0.385 (33/91)
13	107788061	A	C	Zswim6	c.653-52T>G		intron_variant	0.385 (18/43)
5	87927555	T	G	1700066N21Rik	n.433-13423A>C		intron_variant	0.385 (12/31)
5	87927555	T	G	Csn3	c.-5-17T>G		intron_variant	0.385 (12/31)
1	139231818	G	T	Crb1	c.3876-28C>A		intron_variant	0.385 (11/32)
8	25735829	C	T	Ddhd2	c.1678-718G>A		intron_variant	0.383 (30/73)
16	43347573	CT	C	Zbtb20	c.-353+44968delT		intron_variant	0.383 (24/66)
8	110571779	C	A	Hydin	c.11060-32C>A		intron_variant	0.383 (22/52)
3	51855449	C	G	Maml3	c.2043+50G>C		intron_variant	0.381 (9/25)
4	123039621	G	T	Trit1	c.315+35G>T		intron_variant	0.381 (27/70)
3	32737240	G	T	Ndufb5	c.124+35G>T		intron_variant	0.381 (11/24)
2	68613088	CA	C	4933409G03Rik	c.606+34delA		intron_variant	0.381 (10/25)
17	86001617	A	C	Srbd1	c.2142-10T>G		intron_variant	0.381 (10/24)
5	149427507	G	T	Gm43150	n.98-1316C>A		intron_variant	0.38 (52/132)
10	79829375	CT	C	Misp	c.1819-9delT		intron_variant	0.38 (37/101)
5	8399635	T	C	Dbf4	c.1046+53A>G		intron_variant	0.378 (18/51)
13	64787656	C	G	Cntnap3	c.1345+47G>C		intron_variant	0.378 (16/43)
19	55863585	G	A	Tcf7l2	c.484-44838G>A		intron_variant	0.375 (8/19)
5	137819036	A	C	Zcwpw1	c.1444+12A>C		intron_variant	0.375 (38/112)
16	59543977	A	C	Crybg3	c.1691+52T>G		intron_variant	0.375 (16/44)
17	46973896	C	T	Ubr2	c.1674+21G>A		intron_variant	0.375 (15/41)
6	18023023	G	C	Wnt2	c.588+38C>G		intron_variant	0.375 (15/38)
13	104429879	T	G	Adamts6	c.2272+9T>G		intron_variant	0.373 (30/77)
9	71717359	C	A	Cgnl1	c.1893+37G>T		intron_variant	0.373 (23/65)
3	41663900	C	T	Sclt1	c.1293+52G>A		intron_variant	0.373 (22/64)
13	60800838	T	G	Ctsll3	c.250-44A>C		intron_variant	0.372 (41/110)
5	115862947	C	A	Cit	c.415-11C>A		intron_variant	0.371 (33/83)
9	110942521	A	T	Tdgf1	c.290+9T>A		intron_variant	0.371 (25/68)
3	22203260	T	C	Tbl1xr1	c.1250+36T>C		intron_variant	0.371 (15/41)
4	108507885	T	G	Zcchc11	c.1576-22T>G		intron_variant	0.37 (84/213)
4	127026929	G	T	Sfpq	c.1791+43G>T		intron_variant	0.37 (25/66)
6	92828066	C	A	Adamts9	c.4345-4552G>T		intron_variant	0.37 (19/52)
13	12340314	C	A	Actn2	c.126+61G>T		intron_variant	0.37 (13/36)
10	60368946	T	A	Cdh23	c.4845+7843A>T		intron_variant	0.37 (13/35)
10	8725777	A	C	Sash1	c.3430-17T>G		intron_variant	0.37 (12/34)
4	133966694	G	A	Hmgn2	c.153+72C>T		intron_variant	0.369 (28/76)
10	7759785	G	T	Gm20470	n.164+1151C>A		intron_variant	0.369 (26/72)
5	105122822	CA	C	Gbp4	c.889+52delT		intron_variant	0.368 (22/65)
5	105122822	CA	C	Gbp8	c.-25+16657delT		intron_variant	0.368 (22/65)
17	32338850	T	G	Akap8l	c.89-27A>C		intron_variant	0.367 (35/94)
10	95321893	A	G	Cradd	c.298+693T>C		intron_variant	0.367 (15/44)
4	118369264	A	T	Szt2	c.8995-10T>A		intron_variant	0.367 (13/36)
3	10334487	C	T	Gm38303	c.210+902G>A		intron_variant	0.367 (13/36)
X	136775577	G	T	BC065397	n.2601-12944G>T		intron_variant	0.367 (12/34)
X	136775577	G	T	Glra4	c.200-24C>A		intron_variant	0.367 (12/34)
5	24377654	C	A	Gm15587	n.103-5317G>T		intron_variant	0.367 (11/33)
13	97978374	G	T	Arhgef28	c.1911+56C>A		intron_variant	0.367 (11/32)
10	93478395	G	T	Lta4h	c.1380-52G>T		intron_variant	0.366 (54/153)
5	138616440	C	A	Zfp68	c.21+30G>T		intron_variant	0.366 (40/114)
18	53703292	T	A	Cep120	c.2368-48A>T		intron_variant	0.366 (30/87)
14	26951399	T	A	Appl1	c.704+36A>T		intron_variant	0.366 (16/44)
14	7923445	G	T	Flnb	c.5182-10G>T		intron_variant	0.365 (25/62)
7	120116207	G	C	Tmem159	c.266-13G>C		intron_variant	0.365 (23/67)
1	131662090	A	C	Ctse	c.71+24A>C		intron_variant	0.364 (9/25)
7	99552290	G	T	Arrb1	c.20+16492G>T		intron_variant	0.364 (9/24)
11	75795750	G	T	Gm12339	n.51-59G>T		intron_variant	0.364 (9/23)
X	8085789	C	G	Was	c.1392+53G>C		intron_variant	0.364 (31/86)
4	107851661	C	A	Lrp8	c.1351+36C>A		intron_variant	0.362 (25/71)
4	107851662	G	T	Lrp8	c.1351+37G>T		intron_variant	0.362 (24/69)
1	24322271	A	C	Col19a1	c.1753-13T>G		intron_variant	0.362 (22/59)
7	104050273	T	A	4930516K23Rik	c.7+9321A>T		intron_variant	0.362 (20/56)
19	6080121	T	C	Gm28374	c.193+1726A>G		intron_variant	0.361 (16/42)
10	78577262	G	T	Ilvbl	c.604+13G>T		intron_variant	0.361 (14/38)
13	58871800	AT	A	Ntrk2	c.1195+38delT		intron_variant	0.359 (16/48)
2	28675643	T	G	Tsc1	c.1325-20T>G		intron_variant	0.359 (15/42)
4	94665232	G	T	Ift74	c.1054+2566G>T		intron_variant	0.358 (58/165)
12	112126634	A	T	Aspg	c.1612-28A>T		intron_variant	0.357 (8/20)
2	122170105	G	T	Patl2	c.-266+8990C>A		intron_variant	0.357 (12/31)
4	117903304	C	A	Ipo13	c.1885-40G>T		intron_variant	0.357 (12/31)
4	117109443	G	A	Ptch2	c.1590+25G>A		intron_variant	0.357 (11/34)
19	5722909	T	C	Ehbp1l1	c.162+41A>G		intron_variant	0.357 (10/31)
8	122269654	C	A	Gm20388	c.22-2025704C>A		intron_variant	0.357 (10/30)
14	75202794	C	A	Lcp1	c.491+26C>A		intron_variant	0.356 (43/123)
9	20787174	C	A	Col5a3	c.2557-40G>T		intron_variant	0.356 (25/69)
14	13454391	G	A	Synpr	c.85-39117G>A		intron_variant	0.356 (24/64)
8	127376725	G	T	Pard3	c.1400-19G>T		intron_variant	0.356 (19/52)
3	141678010	C	A	Gm15689	n.129+4675G>T		intron_variant	0.355 (31/93)
10	128199615	G	T	Gls2	c.283-22G>T		intron_variant	0.355 (14/40)
3	54365878	AT	A	Postn	c.225-24delT		intron_variant	0.354 (65/199)
10	128548648	T	G	Rpl41	c.35+10A>C		intron_variant	0.354 (60/166)
9	78108988	C	A	Fbxo9	c.6+14G>T		intron_variant	0.354 (21/61)
7	38522668	G	C	Gm5591	c.8-32C>G		intron_variant	0.354 (18/54)
7	38522668	G	C	Gm29087	n.290-6150G>C		intron_variant	0.354 (18/54)
5	87979926	C	G	Gm28434	c.54+9214C>G		intron_variant	0.353 (32/98)
18	65051206	G	T	Nedd4l	c.123-23518G>T		intron_variant	0.353 (31/82)
1	135154798	G	T	Arl8a	c.511+15G>T		intron_variant	0.353 (21/61)
12	33401179	C	A	Efcab10	c.363-14C>A		intron_variant	0.352 (53/145)
11	87163784	A	T	Trim37	c.810-35A>T		intron_variant	0.352 (34/98)
7	66172226	C	G	Gm26827	n.40+856G>C		intron_variant	0.351 (15/41)
10	53652477	T	G	Fam184a	c.2311-24A>C		intron_variant	0.35 (9/26)
13	75090267	T	G	Pcsk1	c.180+26T>G		intron_variant	0.35 (8/23)
7	16789738	G	C	Slc1a5	c.706-39G>C		intron_variant	0.35 (8/21)
10	77771024	G	T	Tspear	c.86-58443G>T		intron_variant	0.35 (15/43)
16	63773590	A	G	Epha3	c.154-20T>C		intron_variant	0.35 (11/27)
5	84156570	T	G	Epha5	c.1409-34A>C		intron_variant	0.349 (20/56)
2	90905644	T	G	Kbtbd4	c.20-22T>G		intron_variant	0.349 (18/50)
7	46016330	C	G	Abcc6	c.812+53G>C		intron_variant	0.348 (9/25)
7	140096098	C	A	Prap1	c.76-52C>A		intron_variant	0.348 (9/25)
9	74237776	G	C	Wdr72	c.3184+19004G>C		intron_variant	0.348 (82/238)
1	172293540	GC	G	Atp1a2	c.117+31delG		intron_variant	0.348 (23/61)
12	102704827	C	G	Gm28373	n.273+15225G>C		intron_variant	0.348 (10/31)
12	89517909	C	A	Nrxn3	c.3142+4797C>A		intron_variant	0.347 (28/83)
X	148696268	C	A	Gm15127	c.1264-54C>A		intron_variant	0.346 (51/154)
14	30889979	C	G	Itih4	c.519+20C>G		intron_variant	0.346 (13/32)
9	122251097	T	G	Ano10	c.1797+50A>C		intron_variant	0.346 (12/33)
12	105654292	G	A	Atg2b	c.2161-10C>T		intron_variant	0.346 (10/31)
6	142829099	G	C	Gm7457	n.660-2004G>C		intron_variant	0.346 (10/30)
10	6831982	C	A	Oprm1	c.1159-535C>A		intron_variant	0.345 (24/68)
3	138104779	C	A	Gm43691	n.61+803C>A		intron_variant	0.345 (13/34)
1	74744428	G	A	Prkag3	c.1168+28C>T		intron_variant	0.345 (12/33)
9	105786303	A	C	Col6a6	c.62-28T>G		intron_variant	0.344 (29/78)
1	97822894	C	G	Pam	c.2761+42G>C		intron_variant	0.344 (16/43)
7	19385668	A	C	Gm26852	n.4831+2220T>G		intron_variant	0.344 (14/38)
12	54061946	C	A	Npas3	c.1169-37C>A		intron_variant	0.344 (14/38)
18	37681840	A	T	Pcdhga1	c.2421+17475A>T		intron_variant	0.343 (54/164)
18	37681840	A	T	Pcdhga2	c.2421+10315A>T		intron_variant	0.343 (54/164)
18	37681840	A	T	Pcdhga3	c.2412+4933A>T		intron_variant	0.343 (54/164)
18	37681840	A	T	Gm42416	c.2386-143181A>T		intron_variant	0.343 (54/164)
18	37681840	A	T	Gm37013	c.223-143181A>T		intron_variant	0.343 (54/164)
18	37681840	A	T	Gm37388	c.337-143181A>T		intron_variant	0.343 (54/164)
4	124574330	G	T	Gm27247	n.331-45313C>A		intron_variant	0.343 (14/42)
6	80019758	G	T	Lrrtm4	c.7+572G>T		intron_variant	0.342 (16/43)
6	80019758	G	T	Gm4409	n.1685+1714C>A		intron_variant	0.342 (16/43)
14	20588049	C	T	Usp54	c.825+26G>A		intron_variant	0.341 (15/50)
14	40840163	T	G	Sh2d4b	c.982+62A>C		intron_variant	0.34 (22/63)
16	36708240	T	G	Ildr1	c.56-10T>G		intron_variant	0.34 (19/60)
17	32055057	G	T	Rrp1b	c.969-48G>T		intron_variant	0.34 (18/61)
4	136316351	T	A	Hnrnpr	c.158-10T>A		intron_variant	0.339 (30/81)
14	52133879	C	A	Rpgrip1	c.1034+20C>A		intron_variant	0.339 (25/78)
14	41981007	T	G	1700024B05Rik	c.23-15164T>G		intron_variant	0.338 (63/178)
13	33897302	A	G	Serpinb6c	c.321+42T>C		intron_variant	0.338 (30/89)
7	30528823	A	T	Arhgap33	c.1158-25T>A		intron_variant	0.333 (9/29)
8	122802472	A	G	Gm20388	c.22-1492886A>G		intron_variant	0.333 (9/27)
8	122802472	A	G	Acsf3	c.1234-43A>G		intron_variant	0.333 (9/27)
7	125472280	C	T	Nsmce1	c.179-51G>A		intron_variant	0.333 (8/24)
14	66035133	G	T	Adam2	c.1884+9C>A		intron_variant	0.333 (48/146)
16	91896304	A	C	Itsn1	c.4069-23A>C		intron_variant	0.333 (29/93)
5	73408342	G	T	Cwh43	c.235+14G>T		intron_variant	0.333 (27/79)
16	59433542	G	A	Gabrr3	c.604+17G>A		intron_variant	0.333 (23/69)
14	59575713	G	C	Cdadc1	c.1223+21C>G		intron_variant	0.333 (22/61)
2	112910002	GAA	G	Ryr3	c.1634-13_1634-12delTT		intron_variant	0.333 (21/65)
10	4410682	G	T	Rmnd1	c.1082+31C>A		intron_variant	0.333 (19/55)
1	82531647	A	C	Col4a4	c.634-12T>G		intron_variant	0.333 (18/53)
7	29001870	G	T	Map4k1	c.2287+32G>T		intron_variant	0.333 (17/51)
7	29001868	A	C	Map4k1	c.2287+30A>C		intron_variant	0.333 (17/50)
1	171400730	A	C	Arhgap30	c.345+30A>C		intron_variant	0.333 (16/47)
4	63324818	A	G	Col27a1	c.4764+29A>G		intron_variant	0.333 (15/46)
7	141870855	G	A	Muc5b	c.13936-16G>A		intron_variant	0.333 (14/45)
1	120484737	G	A	Marco	c.997+37C>T		intron_variant	0.333 (13/43)
6	48977782	T	A	Doxl2	c.1844+9T>A		intron_variant	0.333 (13/34)
4	134532126	C	A	Mtfr1l	c.120+18G>T		intron_variant	0.333 (12/37)
16	3976305	C	A	Nlrc3	c.49+24G>T		intron_variant	0.333 (12/37)
14	60012349	C	T	Atp8a2	c.1662+30G>A		intron_variant	0.333 (11/34)
1	78706233	T	G	Acsl3	c.2006-25T>G		intron_variant	0.333 (10/31)
11	106348857	G	T	Scn4a	c.392+43C>A		intron_variant	0.333 (10/28)
14	56118859	A	G	Gzme	c.207-26T>C		intron_variant	0.33 (43/125)
14	34249032	A	C	Fam35a	c.1751-14T>G		intron_variant	0.329 (31/101)
18	45561324	AG	A	Kcnn2	c.1362+10delG		intron_variant	0.327 (37/114)
9	25293639	T	G	2017-09-07	c.513-46T>G		intron_variant	0.327 (21/64)
10	120382087	AC	A	Hmga2	c.250-7388delG		intron_variant	0.327 (21/60)
5	110378412	A	G	Fbrsl1	c.1321+17T>C		intron_variant	0.327 (19/63)
19	7709608	A	G	Slc22a19	c.506+25T>C		intron_variant	0.326 (39/116)
12	103142776	GT	G	Unc79	c.6630+24delT		intron_variant	0.326 (34/109)
11	83004814	A	T	Slfn8	c.1199-34T>A		intron_variant	0.326 (17/53)
16	72983894	G	C	Robo1	c.2497+14G>C		intron_variant	0.326 (15/52)
11	115594878	C	A	Gga3	c.125+31G>T		intron_variant	0.325 (44/136)
9	108068070	T	G	Rnf123	c.1277+52A>C		intron_variant	0.325 (17/47)
1	37947177	C	A	Gm15457	n.340-1486C>A		intron_variant	0.325 (16/51)
5	149544895	G	T	Wdr95	c.180+36G>T		intron_variant	0.325 (15/49)
5	24422778	C	G	Cdk5	c.126+20G>C		intron_variant	0.325 (15/46)
9	111184235	G	T	Lrrfip2	c.289-4527G>T		intron_variant	0.324 (62/187)
16	19085125	G	T	2010309G21Rik	n.319-14127G>T		intron_variant	0.324 (38/115)
12	69158648	C	G	Rps29	c.162+13G>C		intron_variant	0.324 (29/87)
10	60475076	C	A	Cdh23	c.1135-54G>T		intron_variant	0.324 (24/86)
9	3759362	G	A	Gucy1a2	c.1201-34G>A		intron_variant	0.324 (15/43)
16	63568559	G	T	Epha3	c.2350-22C>A		intron_variant	0.324 (15/43)
11	69403737	C	G	Kdm6b	c.3561+53G>C		intron_variant	0.324 (13/40)
12	74162422	T	G	Syt16	c.193+32871T>G		intron_variant	0.323 (25/71)
14	120407942	G	T	Mbnl2	c.1107+3210G>T		intron_variant	0.323 (22/70)
7	104128918	T	A	4930516K23Rik	c.-111+8428A>T		intron_variant	0.321 (9/35)
4	124610705	T	A	Gm27247	n.330+46135A>T		intron_variant	0.321 (22/68)
9	6955888	C	G	Dync2h1	c.12474+19G>C		intron_variant	0.321 (21/65)
10	120382089	G	A	Hmga2	c.250-7389C>T		intron_variant	0.321 (21/60)
16	23108674	AT	A	Eif4a2	c.79-36delT		intron_variant	0.321 (19/59)
9	119758365	T	G	Scn11a	c.4270+42A>C		intron_variant	0.321 (10/32)
7	102753416	C	G	Olfr78	c.-1053-283G>C		intron_variant	0.32 (36/108)
7	114226574	C	A	Copb1	c.2145+29G>T		intron_variant	0.32 (18/56)
4	18887762	A	AC	Gm11867	n.1154-3325_1154-3324insC		intron_variant	0.32 (17/58)
4	18887762	A	AC	Cnbd1	c.766-16_766-15insG		intron_variant	0.32 (17/58)
7	143363699	G	T	4933417O13Rik	n.186+741C>A		intron_variant	0.32 (10/31)
8	69883259	T	C	Cilp2	c.1138+41A>G		intron_variant	0.32 (10/31)
7	44633014	G	C	Myh14	c.2343-10C>G		intron_variant	0.318 (18/56)
18	36993561	G	A	Pcdha1	c.2388+60889G>A		intron_variant	0.317 (43/134)
18	36993561	G	A	Pcdha2	c.2388+51856G>A		intron_variant	0.317 (43/134)
18	36993561	G	A	Pcdha3	c.2370+44985G>A		intron_variant	0.317 (43/134)
18	36993561	G	A	Pcdha4	c.2385+38411G>A		intron_variant	0.317 (43/134)
18	36993561	G	A	Pcdha5	c.2346+30776G>A		intron_variant	0.317 (43/134)
18	36993561	G	A	Pcdha6	c.2382+23424G>A		intron_variant	0.317 (43/134)
18	36993561	G	A	Pcdha7	c.2355+17283G>A		intron_variant	0.317 (43/134)
18	36993561	G	A	Gm42416	c.2385+38411G>A		intron_variant	0.317 (43/134)
18	36993561	G	A	Gm37013	c.222+23424G>A		intron_variant	0.317 (43/134)
18	36993561	G	A	Gm37388	c.336+17283G>A		intron_variant	0.317 (43/134)
9	67278438	ACC	A	Tln2	c.5368-311_5368-310delGG		intron_variant	0.317 (23/69)
9	67258335	C	T	Tln2	c.6361-31G>A		intron_variant	0.317 (17/48)
13	4275666	A	C	Akr1c12	c.369+58T>G		intron_variant	0.316 (19/66)
14	66213302	C	A	Ptk2b	c.204+10G>T		intron_variant	0.316 (13/44)
10	128282056	G	A	Stat2	c.1095-46G>A		intron_variant	0.315 (31/89)
7	124346415	T	G	Hs3st4	c.714-50411T>G		intron_variant	0.315 (22/64)
2	128680468	G	A	Anapc1	c.376-23C>T		intron_variant	0.315 (18/63)
7	102753414	T	A	Olfr78	c.-1053-281A>T		intron_variant	0.314 (36/107)
13	95442044	T	G	Crhbp	c.544+24A>C		intron_variant	0.314 (27/83)
6	141817707	A	C	Slco1a4	c.1271+11T>G		intron_variant	0.314 (17/59)
1	36348707	T	A	Kansl3	c.1585-26A>T		intron_variant	0.314 (14/46)
3	87457359	T	G	Fcrl5	c.1676-11T>G		intron_variant	0.313 (36/106)
11	67189286	A	G	Myh2	c.3358-33A>G		intron_variant	0.313 (31/95)
19	10863210	C	A	Tmem132a	c.1344+13G>T		intron_variant	0.313 (15/46)
18	36975840	G	C	Pcdha1	c.2388+43168G>C		intron_variant	0.31 (26/82)
18	36975840	G	C	Pcdha2	c.2388+34135G>C		intron_variant	0.31 (26/82)
18	36975840	G	C	Pcdha3	c.2370+27264G>C		intron_variant	0.31 (26/82)
18	36975840	G	C	Pcdha4	c.2385+20690G>C		intron_variant	0.31 (26/82)
18	36975840	G	C	Pcdha5	c.2346+13055G>C		intron_variant	0.31 (26/82)
18	36975840	G	C	Pcdha6	c.2382+5703G>C		intron_variant	0.31 (26/82)
18	36975840	G	C	Gm42416	c.2385+20690G>C		intron_variant	0.31 (26/82)
18	36975840	G	C	Gm37013	c.222+5703G>C		intron_variant	0.31 (26/82)
7	28094865	T	C	Fcgbp	c.3526-33T>C		intron_variant	0.31 (21/68)
12	111994388	G	C	Tdrd9	c.649-56G>C		intron_variant	0.31 (15/48)
18	37413395	AC	A	Gm42416	c.2386-411625delC		intron_variant	0.309 (27/89)
18	37413395	AC	A	Gm37013	c.223-411625delC		intron_variant	0.309 (27/89)
18	37413395	AC	A	Gm37388	c.337-411625delC		intron_variant	0.309 (27/89)
13	70793248	C	T	Adamts16	c.1042-23G>A		intron_variant	0.308 (9/30)
13	33089591	G	T	Serpinb1b	c.307-39G>T		intron_variant	0.308 (9/27)
14	30596064	C	A	Prkcd	c.1945-39G>T		intron_variant	0.308 (20/63)
4	86341053	T	G	Adamtsl1	c.2347-12T>G		intron_variant	0.308 (12/33)
9	109555326	A	T	Fbxw15	c.1171-55T>A		intron_variant	0.306 (37/118)
13	4596357	C	A	Akr1e1	c.624-625G>T		intron_variant	0.306 (33/113)
7	104059288	A	T	4930516K23Rik	c.7+306T>A		intron_variant	0.306 (31/97)
5	145170466	C	A	Cpsf4	c.104-49C>A		intron_variant	0.306 (29/84)
18	58203737	G	A	Fbn2	c.436+9C>T		intron_variant	0.306 (14/44)
2	26326181	G	T	Gpsm1	c.1062-33G>T		intron_variant	0.304 (8/25)
17	58138589	T	G	Cntnap5c	c.1647-24T>G		intron_variant	0.304 (58/184)
5	144997290	G	A	Kpna7	c.694-39C>T		intron_variant	0.304 (52/164)
9	88962141	C	A	Bcl2a1a	c.421-31C>A		intron_variant	0.304 (35/115)
6	129493664	G	C	Olr1	c.560-21C>G		intron_variant	0.304 (21/70)
4	117857366	C	A	Gm17114	n.385+10808G>T		intron_variant	0.303 (14/41)
7	46204085	A	G	Ush1c	c.2184+45T>C		intron_variant	0.302 (20/65)
12	55048848	C	G	2700097O09Rik	c.789+39G>C		intron_variant	0.302 (13/46)
1	131182217	G	T	Eif2d	c.1646-551G>T		intron_variant	0.3 (25/84)
7	104274115	G	C	Trim5	c.770+658C>G		intron_variant	0.3 (22/71)
1	83384885	A	T	Sphkap	c.33-22557T>A		intron_variant	0.3 (20/74)
11	50791785	C	A	Adamts2	c.2621-18C>A		intron_variant	0.3 (19/64)
7	27428163	C	T	Sptbn4	c.590+21G>A		intron_variant	0.3 (16/52)
16	11901508	C	T	Cpped1	c.70+7758G>A		intron_variant	0.3 (15/51)
14	26723698	C	A	Dnah12	c.1911+67C>A		intron_variant	0.299 (36/124)
19	16679984	T	C	Vps13a	c.5394+26A>G		intron_variant	0.299 (27/83)
12	112014392	C	A	Tdrd9	c.1324-50C>A		intron_variant	0.298 (35/116)
14	45461956	C	A	Fermt2	c.1728-48G>T		intron_variant	0.298 (20/67)
13	55663208	T	C	Ddx46	c.1627-11T>C		intron_variant	0.297 (51/177)
5	138230410	A	C	Nxpe5	c.57+468A>C		intron_variant	0.297 (37/115)
1	83014001	C	A	Slc19a3	c.1297-12G>T		intron_variant	0.297 (14/41)
1	132610760	T	C	Nfasc	c.1391+15A>G		intron_variant	0.297 (13/42)
10	64959945	C	G	Ctnna3	c.2400+41C>G		intron_variant	0.297 (13/41)
17	6017648	A	G	Synj2	c.1940+21A>G		intron_variant	0.296 (8/30)
9	72848494	A	T	Prtg	c.955+22A>T		intron_variant	0.296 (8/28)
5	144786575	T	C	Trrap	c.898-57T>C		intron_variant	0.296 (20/68)
9	122894662	GT	G	A530083I20Rik	n.271+7252delA		intron_variant	0.296 (19/65)
9	122894662	GT	G	Zkscan7	c.725-21delT		intron_variant	0.296 (19/65)
1	51301156	G	T	9330175M20Rik	n.230+26632C>A		intron_variant	0.296 (10/34)
18	37007179	C	T	Pcdha1	c.2388+74507C>T		intron_variant	0.295 (25/86)
18	37007179	C	T	Pcdha2	c.2388+65474C>T		intron_variant	0.295 (25/86)
18	37007179	C	T	Pcdha3	c.2370+58603C>T		intron_variant	0.295 (25/86)
18	37007179	C	T	Pcdha4	c.2385+52029C>T		intron_variant	0.295 (25/86)
18	37007179	C	T	Pcdha5	c.2346+44394C>T		intron_variant	0.295 (25/86)
18	37007179	C	T	Pcdha6	c.2382+37042C>T		intron_variant	0.295 (25/86)
18	37007179	C	T	Pcdha7	c.2355+30901C>T		intron_variant	0.295 (25/86)
18	37007179	C	T	Pcdha8	c.2382+12331C>T		intron_variant	0.295 (25/86)
18	37007179	C	T	Pcdha9	c.2481+6819C>T		intron_variant	0.295 (25/86)
18	37007179	C	T	Gm42416	c.2385+52029C>T		intron_variant	0.295 (25/86)
18	37007179	C	T	Gm37013	c.222+37042C>T		intron_variant	0.295 (25/86)
18	37007179	C	T	Gm37388	c.336+30901C>T		intron_variant	0.295 (25/86)
7	29724110	G	T	Catsperg2	c.327+925C>A		intron_variant	0.294 (46/148)
6	40461924	A	C	Wee2	c.1013-33A>C		intron_variant	0.294 (11/36)
4	156047045	T	A	Ttll10	c.668-35A>T		intron_variant	0.293 (21/71)
16	57189444	T	G	Tbc1d23	c.1093-12A>C		intron_variant	0.292 (8/30)
9	37417262	A	C	Robo3	c.3973+64T>G		intron_variant	0.292 (18/60)
1	143761227	G	T	Trove2	c.1203+43C>A		intron_variant	0.292 (16/55)
1	151921142	C	G	1700025G04Rik	c.190-19G>C		intron_variant	0.291 (29/98)
13	50467393	T	G	Gm8739	n.127+24222A>C		intron_variant	0.29 (40/142)
9	110518071	TA	T	Kif9	c.1924+362delA		intron_variant	0.29 (26/89)
18	36975534	G	C	Pcdha1	c.2388+42862G>C		intron_variant	0.289 (69/238)
18	36975534	G	C	Pcdha2	c.2388+33829G>C		intron_variant	0.289 (69/238)
18	36975534	G	C	Pcdha3	c.2370+26958G>C		intron_variant	0.289 (69/238)
18	36975534	G	C	Pcdha4	c.2385+20384G>C		intron_variant	0.289 (69/238)
18	36975534	G	C	Pcdha5	c.2346+12749G>C		intron_variant	0.289 (69/238)
18	36975534	G	C	Pcdha6	c.2382+5397G>C		intron_variant	0.289 (69/238)
18	36975534	G	C	Gm42416	c.2385+20384G>C		intron_variant	0.289 (69/238)
18	36975534	G	C	Gm37013	c.222+5397G>C		intron_variant	0.289 (69/238)
1	171699692	T	G	Cd48	c.643+42T>G		intron_variant	0.289 (16/53)
4	148496269	G	C	Mtor	c.4253+4503G>C		intron_variant	0.289 (14/45)
5	21910778	G	A	Reln	c.9196+35C>T		intron_variant	0.289 (13/43)
13	67823146	T	G	4930525G20Rik	n.152-2369A>C		intron_variant	0.288 (46/175)
10	108241093	A	T	Ppp1r12a	c.957-28A>T		intron_variant	0.288 (27/98)
19	20620116	A	C	Aldh1a1	c.442+18A>C		intron_variant	0.288 (23/84)
1	194712147	G	A	Plxna2	c.1372-37G>A		intron_variant	0.288 (18/66)
1	93042777	A	G	Kif1a	c.3067-23T>C		intron_variant	0.286 (8/26)
4	155753650	A	C	Atad3a	c.678-14T>G		intron_variant	0.286 (42/134)
10	31346593	G	T	Tpd52l1	c.386+18C>A		intron_variant	0.286 (29/95)
4	139396536	C	G	Ubr4	c.1019-21C>G		intron_variant	0.286 (24/79)
7	4522282	C	A	Tnni3	c.11+23G>T		intron_variant	0.286 (12/46)
8	122333724	A	C	Gm20388	c.22-1961634A>C		intron_variant	0.286 (12/44)
6	90338786	C	T	Uroc1	c.541-17C>T		intron_variant	0.286 (12/39)
2	18853226	A	G	Pip4k2a	c.679-300T>C		intron_variant	0.284 (54/183)
6	135740907	G	C	Gm14329	n.144-2957G>C		intron_variant	0.284 (50/154)
6	135740907	G	C	Grin2b	c.2171+15C>G		intron_variant	0.284 (50/154)
1	17752851	G	T	Gm28153	n.83-917C>A		intron_variant	0.284 (27/86)
7	90176416	G	T	Picalm	c.1017+14G>T		intron_variant	0.283 (32/115)
10	60294953	G	C	Psap	c.574-12G>C		intron_variant	0.283 (20/65)
7	126495173	A	C	Atxn2l	c.2016+27T>G		intron_variant	0.283 (18/60)
18	37687196	G	A	Pcdhga1	c.2421+22831G>A		intron_variant	0.282 (28/108)
18	37687196	G	A	Pcdhga2	c.2421+15671G>A		intron_variant	0.282 (28/108)
18	37687196	G	A	Pcdhga3	c.2412+10289G>A		intron_variant	0.282 (28/108)
18	37687196	G	A	Pcdhgb1	c.2382+4357G>A		intron_variant	0.282 (28/108)
18	37687196	G	A	Gm42416	c.2386-137825G>A		intron_variant	0.282 (28/108)
18	37687196	G	A	Gm37013	c.223-137825G>A		intron_variant	0.282 (28/108)
18	37687196	G	A	Gm37388	c.337-137825G>A		intron_variant	0.282 (28/108)
16	90969165	C	A	Synj1	c.1846+18G>T		intron_variant	0.282 (13/47)
13	75770481	A	G	Ell2	c.1759-65A>G		intron_variant	0.282 (12/41)
7	92420690	G	C	Dlg2	c.1978+3367G>C		intron_variant	0.281 (28/105)
1	134999256	C	A	Lgr6	c.1136+58G>T		intron_variant	0.28 (8/28)
16	56762048	C	G	Adgrg7	c.826+12G>C		intron_variant	0.28 (53/182)
6	36937302	A	G	Dgki	c.2376+19T>C		intron_variant	0.28 (27/101)
6	36937302	A	G	1700111E14Rik	n.185+70A>G		intron_variant	0.28 (27/101)
2	76736567	G	T	Gm13938	n.72+13720G>T		intron_variant	0.279 (23/78)
11	4212955	G	C	Tbc1d10a	c.742-23G>C		intron_variant	0.279 (18/54)
11	107491939	G	A	Psmd12	c.660+9G>A		intron_variant	0.278 (32/130)
19	5049387	A	T	Brms1	c.734-20A>T		intron_variant	0.278 (27/96)
6	128521079	G	A	Pzp	c.752+22C>T		intron_variant	0.278 (24/87)
13	101701414	C	G	Pik3r1	c.916+33G>C		intron_variant	0.278 (20/71)
1	170375218	A	G	Nos1ap	c.329+30T>C		intron_variant	0.278 (11/44)
14	12616043	G	T	Cadps	c.963+23C>A		intron_variant	0.278 (11/41)
9	7934765	T	G	Yap1	c.1232-33A>C		intron_variant	0.278 (10/47)
17	25784987	G	C	Haghl	c.105+17C>G		intron_variant	0.277 (14/60)
4	59524889	C	T	Ptbp3	c.43-413G>A		intron_variant	0.276 (9/33)
5	108609370	A	C	Gak	c.741+21T>G		intron_variant	0.276 (43/162)
5	134293926	T	G	Gtf2i	c.100-41A>C		intron_variant	0.276 (25/101)
8	93069270	AC	A	Ces1b	c.754+46delG		intron_variant	0.276 (18/69)
7	108940807	G	T	Eif3f	c.894+27G>T		intron_variant	0.276 (16/59)
7	30776497	G	T	Dmkn	c.1335+374G>T		intron_variant	0.276 (10/35)
12	80583639	T	G	Galnt16	c.779-11T>G		intron_variant	0.275 (20/68)
1	139437612	A	T	Zbtb41	c.1673+42A>T		intron_variant	0.275 (16/58)
2	84849872	A	G	Slc43a1	c.461+29A>G		intron_variant	0.275 (13/45)
11	103928711	A	C	Nsf	c.198+33T>G		intron_variant	0.274 (18/73)
11	72243688	G	T	Slc13a5	c.1588-52C>A		intron_variant	0.273 (9/40)
2	52304013	G	A	Neb	c.1983+17C>T		intron_variant	0.273 (43/170)
X	136452310	A	C	Kir3dl2	c.991+19T>G		intron_variant	0.273 (36/146)
17	34200856	G	C	Gm20496	n.26-599C>G		intron_variant	0.273 (20/74)
11	89441286	G	T	4932411E22Rik	c.1251+44C>A		intron_variant	0.273 (18/79)
X	151004203	C	A	Gnl3l	c.60+42G>T		intron_variant	0.273 (12/42)
7	73480588	C	A	Chd2	c.2353-35G>T		intron_variant	0.273 (10/38)
3	129309745	T	G	Enpep	c.1170+24A>C		intron_variant	0.271 (20/66)
14	48227614	A	G	Peli2	c.208-12596A>G		intron_variant	0.27 (84/303)
5	23053547	T	G	Lhfpl3	c.434-48865T>G		intron_variant	0.27 (18/76)
8	3387621	T	G	A430078G23Rik	c.756-13T>G		intron_variant	0.27 (11/47)
5	67764820	A	T	Atp8a1	c.1128+44T>A		intron_variant	0.27 (10/45)
9	114003384	G	A	Fbxl2	c.120+58C>T		intron_variant	0.269 (22/78)
11	67210498	C	A	Myh1	c.2065+34C>A		intron_variant	0.268 (29/110)
11	33153942	A	C	Npm1	c.840+44T>G		intron_variant	0.268 (27/111)
6	3693830	A	G	Calcr	c.1025+19T>C		intron_variant	0.267 (55/198)
11	69447757	G	T	Dnah2	c.9547+39C>A		intron_variant	0.267 (27/100)
1	44218044	T	G	Mettl21e	c.46+67A>C		intron_variant	0.267 (14/48)
11	69947933	G	T	Slc2a4	c.33+16C>A		intron_variant	0.267 (10/41)
6	103715430	T	A	Chl1	c.3340+31T>A		intron_variant	0.266 (33/131)
10	8390859	C	A	Ust	c.294+29G>T		intron_variant	0.265 (10/43)
7	103839321	T	C	Hbb-bh2	c.316-48A>G		intron_variant	0.265 (10/36)
9	108514929	G	C	Qars	c.2085-38G>C		intron_variant	0.263 (37/141)
8	47053567	CT	C	Enpp6	c.422-9delT		intron_variant	0.263 (36/154)
19	39392111	T	C	Cyp2c38	c.1291+38A>G		intron_variant	0.263 (33/115)
10	25499902	A	T	Epb41l2	c.1993-1922A>T		intron_variant	0.263 (18/66)
1	153803992	TC	T	Rgsl1	c.2355+21delG		intron_variant	0.263 (17/65)
9	109184271	G	T	Fbxw13	c.622-25C>A		intron_variant	0.262 (46/179)
11	98657320	AG	A	Gsdma2	c.1089+30delG		intron_variant	0.262 (30/101)
7	6718402	A	C	Peg3	c.16+24T>G		intron_variant	0.262 (23/77)
2	28001541	G	T	Col5a1	c.2953-29G>T		intron_variant	0.262 (15/54)
10	10698044	T	A	Grm1	c.2661-8142A>T		intron_variant	0.262 (15/53)
12	16544812	C	T	Lpin1	c.2244-16G>A		intron_variant	0.262 (14/55)
13	23892514	C	A	Slc17a1	c.1264-21C>A		intron_variant	0.262 (14/53)
8	72378964	A	C	Eps15l1	c.1785+27T>G		intron_variant	0.261 (8/27)
18	38245024	G	T	1700086O06Rik	n.486-4071C>A		intron_variant	0.261 (34/140)
19	4351720	T	C	Kdm2a	c.687+17A>G		intron_variant	0.261 (33/135)
5	36205164	A	G	Sorcs2	c.548+23981T>C		intron_variant	0.261 (15/53)
3	95448352	A	C	Arnt	c.26-20A>C		intron_variant	0.26 (31/119)
4	130532574	G	T	Nkain1	c.532+30C>A		intron_variant	0.26 (16/63)
7	123297595	A	C	Arhgap17	c.1242-9T>G		intron_variant	0.259 (9/32)
15	44535683	T	C	Pkhd1l1	c.6173-31T>C		intron_variant	0.259 (8/36)
11	32615968	A	G	Stk10	c.2649+62A>G		intron_variant	0.259 (8/35)
10	127841683	G	C	Rdh18-ps	n.314-27G>C		intron_variant	0.259 (24/89)
9	42366634	G	T	Tecta	c.3543+34C>A		intron_variant	0.259 (17/65)
6	48743356	T	G	Gm28053	c.43+1939T>G		intron_variant	0.259 (11/34)
2	114047630	C	T	Actc1	c.991-21G>A		intron_variant	0.258 (9/35)
2	114047630	C	T	A530058N18Rik	n.454-9454C>T		intron_variant	0.258 (9/35)
2	114047632	T	G	Actc1	c.991-23A>C		intron_variant	0.258 (9/34)
2	114047632	T	G	A530058N18Rik	n.454-9452T>G		intron_variant	0.258 (9/34)
5	121921249	G	T	Cux2	c.36+65C>A		intron_variant	0.258 (12/45)
11	82928654	G	T	Unc45bos	n.68-2513C>A		intron_variant	0.258 (11/39)
13	98755996	A	G	Fcho2	c.940-371T>C		intron_variant	0.257 (43/157)
7	111081495	C	A	Eif4g2	c.41+12G>T		intron_variant	0.257 (25/95)
11	110036592	A	G	Abca8a	c.3944-10T>C		intron_variant	0.257 (19/77)
3	87809649	C	T	Pear1	c.-71+14571G>A		intron_variant	0.257 (11/45)
10	53540911	TC	T	Mcm9	c.2429+26delG		intron_variant	0.257 (10/40)
5	105224641	C	A	Gm43302	c.1651-7151G>T		intron_variant	0.256 (51/201)
5	105224641	C	A	Gbp10	c.422+13G>T		intron_variant	0.256 (51/201)
17	18303939	T	C	Vmn2r93	c.219-25T>C		intron_variant	0.256 (35/132)
1	104941007	G	C	Cdh20	c.247-25G>C		intron_variant	0.256 (29/108)
12	31464659	G	A	Slc26a3	c.1494-17G>A		intron_variant	0.256 (29/104)
4	138996343	G	C	Tmco4	c.171-55G>C		intron_variant	0.256 (11/48)
11	58113925	G	T	Cnot8	c.474-25G>T		intron_variant	0.256 (10/45)
6	108423403	A	G	Itpr1	c.5106+38A>G		intron_variant	0.254 (52/196)
2	80502198	A	G	Nckap1	c.3288+27T>C		intron_variant	0.254 (20/78)
14	68633070	C	A	Adam28	c.1112+41G>T		intron_variant	0.254 (17/67)
1	156366047	C	A	Axdnd1	c.1799-230G>T		intron_variant	0.254 (15/63)
17	5725210	C	A	Zdhhc14	c.753-17C>A		intron_variant	0.252 (40/149)
17	74579379	C	T	Gm26749	n.1734-3799G>A		intron_variant	0.252 (36/133)
2	60232380	T	G	2017-03-07	c.517+13T>G		intron_variant	0.25 (8/35)
6	38115748	G	A	Atp6v0a4	c.-18+8580C>T		intron_variant	0.25 (8/34)
2	122451947	A	C	Slc28a2	c.787-36A>C		intron_variant	0.25 (43/170)
3	105921881	T	C	Tmigd3	c.551-39T>C		intron_variant	0.25 (26/94)
16	87793500	T	A	2810407A14Rik	n.273+5656T>A		intron_variant	0.25 (24/102)
7	25733195	C	A	Hnrnpul1	c.1392+49G>T		intron_variant	0.25 (21/86)
7	17745324	C	T	Ceacam5	c.425-60C>T		intron_variant	0.25 (15/61)
13	13669825	G	C	Lyst	c.5614-15G>C		intron_variant	0.25 (14/57)
5	92808776	GT	G	Shroom3	c.320+27873delT		intron_variant	0.25 (13/57)
9	108412923	C	A	Ccdc36	c.441+40G>T		intron_variant	0.25 (13/51)
3	63345266	C	A	Mme	c.1317+13C>A		intron_variant	0.25 (12/51)
12	7985457	G	A	Apob	c.818+47G>A		intron_variant	0.25 (11/48)
12	7985458	A	G	Apob	c.818+48A>G		intron_variant	0.25 (11/48)
7	142968885	C	A	Ascl2	c.10+86G>T		intron_variant	0.25 (11/37)
5	120487390	T	G	Plbd2	c.1301+40A>C		intron_variant	0.25 (10/44)
19	6854445	C	T	Ccdc88b	c.1333+34G>A		intron_variant	0.25 (10/39)
4	148568527	A	G	Exosc10	c.1586+12A>G		intron_variant	0.247 (27/102)
3	146650956	C	T	Samd13	c.166-4527G>A		intron_variant	0.246 (36/150)
1	49338254	C	A	C230029F24Rik	n.500+36C>A		intron_variant	0.246 (14/61)
1	60089242	C	A	Wdr12	c.338+10G>T		intron_variant	0.245 (50/197)
5	112449875	T	C	Sez6l	c.1836-8865A>G		intron_variant	0.245 (15/60)
1	89627719	C	A	Agap1	c.311-42C>A		intron_variant	0.244 (21/93)
7	126368897	G	C	Lat	c.131+45C>G		intron_variant	0.244 (13/47)
7	26199025	C	G	Cyp2b9	c.823-19C>G		intron_variant	0.243 (57/231)
3	90259648	C	G	Crtc2	c.640+36C>G		intron_variant	0.243 (46/187)
11	109139664	T	C	E030025P04Rik	c.433-37A>G		intron_variant	0.243 (11/48)
11	59076471	C	G	Obscn	c.8398+13G>C		intron_variant	0.242 (8/39)
5	28539567	A	T	9530036O11Rik	n.366-24766A>T		intron_variant	0.242 (36/152)
11	73289204	G	T	Trpv3	c.1504-31G>T		intron_variant	0.242 (20/78)
12	80677300	G	A	Slc39a9	c.696+34G>A		intron_variant	0.241 (8/38)
4	145898903	T	C	Zfp986	c.158-26T>C		intron_variant	0.241 (61/286)
2	35006273	T	A	Gm13449	n.122-5536T>A		intron_variant	0.241 (26/115)
1	87099872	C	G	Alpi	c.859+33G>C		intron_variant	0.241 (15/67)
17	24318125	A	G	Abca17	c.1452+31T>C		intron_variant	0.241 (14/60)
2	27965678	G	T	Col5a1	c.1827+28G>T		intron_variant	0.24 (12/51)
7	103841930	G	A	Hbb-bh1	c.316-50C>T		intron_variant	0.239 (14/56)
17	42411202	T	C	Ptchd4	c.1072+33562T>C		intron_variant	0.238 (23/98)
7	13628651	A	T	Sult2a5	c.346-64A>T		intron_variant	0.238 (22/93)
19	25378544	G	A	Kank1	c.37+14G>A		intron_variant	0.238 (18/77)
13	70761773	C	T	Adamts16	c.2656+1642G>A		intron_variant	0.237 (10/49)
2	69156468	G	C	Nostrin	c.342+14G>C		intron_variant	0.236 (18/82)
9	45102992	C	T	Amica1	c.930-43C>T		intron_variant	0.236 (14/64)
2	26368222	C	A	Gm13562	n.88-1379C>A		intron_variant	0.235 (9/43)
6	50229480	A	T	Dfna5	c.405-23T>A		intron_variant	0.235 (9/38)
7	139020134	G	A	CH36-204O7.1	n.396+470C>T		intron_variant	0.235 (8/42)
12	113130088	C	G	Mta1	c.943-32C>G		intron_variant	0.235 (10/43)
2	164035399	G	T	Pabpc1l	c.876+17G>T		intron_variant	0.233 (8/39)
15	92252355	C	G	Cntn1	c.1111-42C>G		intron_variant	0.233 (13/54)
1	93280467	G	T	Sned1	c.2258-14G>T		intron_variant	0.232 (18/71)
11	49096411	T	G	Olfr56	c.-589+9267T>G		intron_variant	0.231 (32/145)
1	162708839	C	A	Prrc2c	c.2215+14G>T		intron_variant	0.231 (28/118)
1	150462065	T	C	Prg4	c.199+32A>G		intron_variant	0.231 (15/64)
1	151448539	G	T	Trmt1l	c.1094+42G>T		intron_variant	0.231 (15/64)
2	112243319	G	C	Lpcat4	c.746+26G>C		intron_variant	0.229 (9/39)
7	139020133	G	T	CH36-204O7.1	n.396+471C>A		intron_variant	0.229 (8/41)
12	89193021	T	G	Nrxn3	c.1060-25T>G		intron_variant	0.229 (13/54)
1	52105198	T	G	Gm28177	n.1073+2159T>G		intron_variant	0.228 (56/250)
3	95538849	TA	T	Ctss	c.276+9delA		intron_variant	0.227 (34/160)
16	45781280	C	A	Phldb2	c.2274+22G>T		intron_variant	0.227 (22/85)
11	3683507	C	A	Morc2a	c.1738-38C>A		intron_variant	0.227 (20/88)
1	130705354	C	A	Gm29427	c.638+23G>T		intron_variant	0.226 (21/111)
1	130705354	C	A	Pfkfb2	c.638+23G>T		intron_variant	0.226 (21/111)
1	65072928	C	A	Crygc	c.252+234G>T		intron_variant	0.225 (43/173)
2	76756069	A	G	Gm13938	n.73-18371A>G		intron_variant	0.224 (26/115)
1	37076534	G	T	Vwa3b	c.911-8699G>T		intron_variant	0.224 (17/82)
2	25778024	G	A	Lcn11	c.234-41G>A		intron_variant	0.224 (16/70)
1	172490613	G	C	Igsf9	c.556-42G>C		intron_variant	0.224 (12/61)
1	172490612	T	A	Igsf9	c.556-43T>A		intron_variant	0.224 (11/60)
2	76918409	G	T	Ttn	c.10378+3142C>A		intron_variant	0.223 (27/140)
3	28805564	G	T	Rpl22l1	c.9+21G>T		intron_variant	0.222 (9/46)
8	70027428	T	G	Mau2	c.991+37A>C		intron_variant	0.222 (22/101)
6	85427939	C	T	Noto	c.577-18C>T		intron_variant	0.222 (19/82)
6	124761614	T	G	Eno2	c.1235+34A>C		intron_variant	0.222 (16/77)
2	91596148	A	T	Ckap5	c.4028-214A>T		intron_variant	0.222 (12/56)
14	32418760	G	T	Chat	c.1518+26C>A		intron_variant	0.222 (10/49)
1	158763028	C	G	Pappa2	c.5014+41G>C		intron_variant	0.222 (10/47)
2	76743364	G	T	Gm13938	n.72+20517G>T		intron_variant	0.221 (41/180)
1	32644065	C	A	Khdrbs2	c.894-28C>A		intron_variant	0.221 (25/121)
1	132996536	AG	A	Mdm4	c.822+26delC		intron_variant	0.221 (16/82)
11	16258102	G	T	Vstm2a	c.79+16G>T		intron_variant	0.22 (39/167)
18	37479160	C	A	Gm42416	c.2386-345861C>A		intron_variant	0.22 (34/148)
18	37479160	C	A	Gm37013	c.223-345861C>A		intron_variant	0.22 (34/148)
18	37479160	C	A	Gm37388	c.337-345861C>A		intron_variant	0.22 (34/148)
16	91617033	G	A	Gm15964	n.346-4429G>A		intron_variant	0.22 (27/119)
2	67514579	C	A	Gm13601	n.168+1779G>T		intron_variant	0.22 (14/59)
5	65646282	TAC	T	Pds5a	c.1767+49_1767+50delGT		intron_variant	0.22 (10/46)
1	130848640	T	G	Pigr	c.1901+10T>G		intron_variant	0.219 (9/42)
17	69248728	T	A	Epb41l3	c.936+11T>A		intron_variant	0.219 (8/36)
2	76770600	T	G	Gm13938	n.73-3840T>G		intron_variant	0.219 (23/112)
8	82907341	G	T	Rnf150	c.481+42851G>T		intron_variant	0.218 (39/193)
1	52101910	A	G	Stat4	c.1620+9A>G		intron_variant	0.218 (28/139)
1	52101910	A	G	Gm28177	n.649+9A>G		intron_variant	0.218 (28/139)
5	34669238	T	C	Grk4	c.145+36T>C		intron_variant	0.218 (21/92)
1	74585270	A	G	Zfp142	c.280+114T>C		intron_variant	0.217 (20/97)
3	82039943	T	G	Gucy1b3	c.978-20A>C		intron_variant	0.217 (16/69)
11	3252324	A	G	Drg1	c.882-42T>C		intron_variant	0.217 (12/57)
8	85011113	T	G	Best2	c.636+16A>C		intron_variant	0.217 (12/57)
8	93333563	C	G	Ces1g	c.402+25G>C		intron_variant	0.217 (11/57)
8	75110481	G	A	Mcm5	c.423+53G>A		intron_variant	0.217 (10/51)
14	30918253	C	T	Itih3	c.1075+22G>A		intron_variant	0.216 (9/45)
2	16650086	T	A	Plxdc2	c.665-23T>A		intron_variant	0.216 (18/87)
11	69422510	G	T	Dnah2	c.12831+9C>A		intron_variant	0.216 (14/67)
11	89050492	C	T	Dgke	c.880-16G>A		intron_variant	0.214 (9/32)
2	27234331	C	A	Sardhos	n.189-303C>A		intron_variant	0.214 (8/35)
16	8582718	C	A	Abat	c.199-19C>A		intron_variant	0.214 (14/66)
11	46979451	T	C	Sgcd	c.697-15A>G		intron_variant	0.214 (10/51)
6	140003825	T	G	Plcz1	c.1402+41A>C		intron_variant	0.213 (14/72)
11	59074877	C	T	Obscn	c.8938+14G>A		intron_variant	0.213 (13/58)
11	34247745	G	T	Dock2	c.4464+30C>A		intron_variant	0.213 (12/56)
10	31326169	G	T	Hddc2	c.502+9G>T		intron_variant	0.212 (25/111)
1	100431875	C	G	Cntnap5b	c.3306+29C>G		intron_variant	0.212 (16/78)
2	20290061	T	A	Etl4	c.35+20T>A		intron_variant	0.21 (16/78)
11	54402035	C	G	Meikin	c.795+2146C>G		intron_variant	0.209 (25/129)
1	176756924	C	G	Gm36992	n.54-1578C>G		intron_variant	0.208 (24/117)
15	103486757	C	A	Nckap1l	c.2699-36C>A		intron_variant	0.208 (23/116)
4	104999277	T	C	1700024P16Rik	c.1730-49T>C		intron_variant	0.208 (17/77)
8	27448088	T	G	Poteg	c.245+26T>G		intron_variant	0.208 (12/65)
8	27448088	T	G	RP23-202K1.1	c.59+26T>G		intron_variant	0.208 (12/65)
12	71895960	G	T	Daam1	c.183+14G>T		intron_variant	0.206 (9/40)
8	4200969	G	C	4932443L11Rik	n.880+5034C>G		intron_variant	0.206 (8/41)
8	4200969	G	C	Evi5l	c.1215+48G>C		intron_variant	0.206 (8/41)
2	118451398	G	A	Eif2ak4	c.3233-14G>A		intron_variant	0.206 (21/89)
5	137836004	A	G	Pilra	c.85+31T>C		intron_variant	0.206 (16/80)
5	14712648	C	A	Gm26954	n.142-6436G>T		intron_variant	0.206 (15/74)
19	11520500	G	T	Ms4a6b	c.147+15G>T		intron_variant	0.205 (10/53)
16	45693592	C	A	Tmprss7	c.48+15G>T		intron_variant	0.204 (28/130)
3	107037266	A	T	Gm27008	n.169+18216T>A		intron_variant	0.204 (26/113)
8	86024261	T	G	Phkb	c.2255-20T>G		intron_variant	0.203 (32/147)
2	122178813	CG	C	Patl2	c.-266+281delC		intron_variant	0.203 (19/82)
18	37296634	G	T	Gm42416	c.2385+341484G>T		intron_variant	0.203 (17/84)
18	37296634	G	T	Gm37013	c.222+326497G>T		intron_variant	0.203 (17/84)
18	37296634	G	T	Gm37388	c.336+320356G>T		intron_variant	0.203 (17/84)
7	89935715	T	A	l7Rn6	c.268+12A>T		intron_variant	0.203 (16/74)
12	83294327	G	T	Dpf3	c.742+35C>A		intron_variant	0.2 (8/29)
16	44291204	G	C	Sidt1	c.561+46C>G		intron_variant	0.2 (25/128)
11	87426869	G	C	Tex14	c.-1-6940G>C		intron_variant	0.2 (22/111)
5	21270495	TA	T	Gsap	c.1687-53delA		intron_variant	0.2 (14/67)
1	127965148	T	G	Gm28800	n.447-508T>G		intron_variant	0.2 (12/55)
1	170969536	T	A	Fcgr2b	c.104-42A>T		intron_variant	0.2 (11/59)
2	33462252	C	G	Zbtb43	c.88+14G>C		intron_variant	0.198 (26/144)
1	133263813	G	T	Gm19461	n.386-5259C>A		intron_variant	0.198 (24/124)
3	145454688	T	C	Col24a1	c.3034-35T>C		intron_variant	0.198 (23/104)
16	34010694	T	G	Kalrn	c.7110-49A>C		intron_variant	0.198 (19/98)
1	139811028	A	C	Cfhr2	c.803-9T>G		intron_variant	0.197 (18/94)
1	32547125	C	G	Khdrbs2	c.811-72046C>G		intron_variant	0.196 (9/46)
1	90791899	G	C	Col6a3	c.6582+25C>G		intron_variant	0.196 (14/69)
6	113628080	T	G	Vhl	c.239-12T>G		intron_variant	0.195 (45/216)
11	62403445	C	T	Ncor1	c.845+354G>A		intron_variant	0.194 (8/41)
11	108343459	G	T	Prkca	c.173+36C>A		intron_variant	0.194 (8/40)
18	37491717	C	A	Gm42416	c.2386-333304C>A		intron_variant	0.193 (42/220)
18	37491717	C	A	Gm37013	c.223-333304C>A		intron_variant	0.193 (42/220)
18	37491717	C	A	Gm37388	c.337-333304C>A		intron_variant	0.193 (42/220)
1	175687762	C	A	Opn3	c.367+4408G>T		intron_variant	0.193 (32/173)
1	63530193	T	G	Adam23	c.648-42T>G		intron_variant	0.193 (22/104)
5	109363559	T	G	Vmn2r16	c.1646-15T>G		intron_variant	0.192 (51/251)
1	133258990	C	A	Plekha6	c.-94-19C>A		intron_variant	0.192 (22/128)
1	133258990	C	A	Gm19461	n.386-436G>T		intron_variant	0.192 (22/128)
2	127113525	C	A	Ncaph	c.1677+35G>T		intron_variant	0.191 (16/83)
17	24506473	G	T	Caskin1	c.3782-50G>T		intron_variant	0.19 (9/49)
1	89992062	G	T	Asb18	c.596+896C>A		intron_variant	0.19 (29/134)
11	80862118	C	A	Spaca3	c.-79-842C>A		intron_variant	0.19 (14/76)
1	174213832	A	T	Spta1	c.3891-30A>T		intron_variant	0.189 (22/119)
1	180136623	G	T	Cdc42bpa	c.3076-29G>T		intron_variant	0.189 (21/108)
2	63183975	C	A	Kcnh7	c.76+27G>T		intron_variant	0.189 (12/46)
8	121590585	G	A	Gm20388	c.21+1679646G>A		intron_variant	0.189 (10/50)
2	180188433	C	A	Lama5	c.5647-41G>T		intron_variant	0.188 (8/38)
2	155620730	AC	A	Myh7b	c.1148-46delC		intron_variant	0.188 (8/36)
1	88071535	C	G	Ugt1a10	c.855+15199C>G		intron_variant	0.188 (65/363)
2	76771236	C	G	Gm13938	n.73-3204C>G		intron_variant	0.188 (28/151)
1	156052189	G	T	Tor1aip2	c.-110-7222G>T		intron_variant	0.188 (24/116)
14	47559132	C	A	Atg14	c.327+42G>T		intron_variant	0.188 (20/99)
14	47559130	C	A	Atg14	c.327+44G>T		intron_variant	0.188 (19/97)
14	47559131	T	TA	Atg14	c.327+42_327+43insT		intron_variant	0.188 (19/97)
2	120502953	T	A	Capn3	c.2116-23T>A		intron_variant	0.188 (17/88)
3	93446859	T	A	Gm37245	n.40+18461A>T		intron_variant	0.188 (10/65)
1	181906375	C	G	Enah	c.2377+12G>C		intron_variant	0.186 (9/47)
2	91824551	G	C	Ambra1	c.2423+11G>C		intron_variant	0.186 (17/99)
6	35208754	C	G	Nup205	c.2534-41C>G		intron_variant	0.186 (11/52)
2	79875191	C	T	Pde1a	c.1052+38G>A		intron_variant	0.185 (29/140)
11	23464188	A	G	Usp34	c.8216-29A>G		intron_variant	0.185 (13/77)
2	71816807	C	A	Itga6	c.307+53C>A		intron_variant	0.185 (12/62)
11	118333019	T	C	Timp2	c.131-12810A>G		intron_variant	0.184 (22/112)
11	85898660	C	A	Tbx4	c.416+48C>A		intron_variant	0.184 (11/62)
11	90649311	A	G	Tom1l1	c.1361+37T>C		intron_variant	0.184 (10/67)
1	32546865	G	T	Khdrbs2	c.811-72306G>T		intron_variant	0.183 (31/163)
2	174345933	G	A	Gnas	c.3188-57G>A		intron_variant	0.182 (8/47)
2	174345933	G	A	Gm20721	c.191+57C>T		intron_variant	0.182 (8/47)
5	65648018	G	T	Pds5a	c.1497-13C>A		intron_variant	0.182 (16/88)
1	132523521	G	T	Cntn2	c.1398-36C>A		intron_variant	0.182 (12/64)
11	56027101	T	G	Gm12239	n.261+11048T>G		intron_variant	0.181 (17/86)
2	91140638	G	T	Madd	c.4678-12C>A		intron_variant	0.181 (14/77)
2	145951203	C	G	Cfap61	c.566+19C>G		intron_variant	0.18 (38/194)
1	131316322	C	A	Srgap2	c.1874+807G>T		intron_variant	0.177 (33/188)
11	53541039	C	A	2017-09-08	c.1286+3124C>A		intron_variant	0.177 (25/145)
2	76784743	C	A	Gm13938	n.269-348C>A		intron_variant	0.175 (18/98)
2	19238628	C	A	Armc3	c.167-13C>A		intron_variant	0.175 (17/94)
2	24626884	A	T	Cacna1b	c.5199-1550T>A		intron_variant	0.175 (13/73)
14	120325436	G	A	Mbnl2	c.174+24G>A		intron_variant	0.174 (9/55)
2	85494266	A	C	4833423E24Rik	c.751-36T>G		intron_variant	0.174 (11/55)
6	69060115	A	C	Igkv4-78	c.49+61T>G		intron_variant	0.173 (58/311)
8	85084830	G	C	Man2b1	c.436+16G>C		intron_variant	0.173 (11/62)
8	86667654	A	T	Lonp2	c.1535-59A>T		intron_variant	0.171 (8/47)
9	108958059	AC	A	Col7a1	c.1640-27delC		intron_variant	0.171 (8/42)
5	148298239	T	G	Mtus2	c.3458-13T>G		intron_variant	0.171 (28/161)
2	180738471	AT	A	Slc17a9	c.978+37delT		intron_variant	0.171 (16/93)
2	79663306	A	C	Ssfa2	c.3654+542A>C		intron_variant	0.17 (8/61)
11	67214637	T	C	Gm12300	n.184-1725A>G		intron_variant	0.17 (21/119)
5	120649550	C	G	Rasal1	c.65+16C>G		intron_variant	0.17 (10/61)
8	109638321	T	G	Pkd1l3	c.3343-9T>G		intron_variant	0.17 (10/56)
8	84915823	G	T	Mast1	c.3010-21C>A		intron_variant	0.169 (19/119)
13	89180415	TA	T	Edil3	c.952+44delA		intron_variant	0.169 (13/79)
11	102461114	C	T	Itga2b	c.1541+15G>A		intron_variant	0.169 (12/79)
2	32315371	A	C	Dnm1	c.1894-24T>G		intron_variant	0.169 (11/72)
2	165839975	C	A	Zmynd8	c.612+23G>T		intron_variant	0.168 (28/149)
1	22433078	C	T	Rims1	c.1945-90G>A		intron_variant	0.167 (22/142)
11	50069776	T	G	Rnf130	c.443-1395T>G		intron_variant	0.166 (42/252)
11	120485613	G	C	Mrpl12	c.265-43G>C		intron_variant	0.165 (22/123)
2	76749922	C	T	Gm13938	n.73-24518C>T		intron_variant	0.165 (19/114)
2	110620241	G	C	Slc5a12	c.822-42G>C		intron_variant	0.165 (17/108)
11	110188014	T	G	Abca6	c.3699-50A>C		intron_variant	0.165 (16/102)
2	58907023	G	T	Ccdc148	c.1060-550C>A		intron_variant	0.164 (11/67)
2	58907023	G	T	Gm11099	c.40-518G>T		intron_variant	0.164 (11/67)
19	38728649	T	TA	Plce1	c.3997-28dupA		intron_variant	0.163 (17/102)
11	30892318	C	A	Asb3	c.104+6772C>A		intron_variant	0.162 (19/125)
5	140902930	A	C	Card11	c.685-13T>G		intron_variant	0.161 (12/68)
2	167725347	C	A	A530013C23Rik	n.170-33C>A		intron_variant	0.16 (10/57)
8	126965344	A	G	Rbm34	c.609+38T>C		intron_variant	0.159 (32/214)
12	116357219	C	T	Esyt2	c.1494+33C>T		intron_variant	0.159 (11/73)
19	12777927	A	T	Zfp91	c.728+15T>A		intron_variant	0.158 (15/95)
1	172215452	C	A	Casq1	c.651+25G>T		intron_variant	0.158 (10/65)
2	161534451	T	C	Ptprt	c.4014+18A>G		intron_variant	0.157 (10/62)
11	101628468	G	T	Rdm1	c.276+16G>T		intron_variant	0.156 (8/49)
5	149600141	C	A	Wdr95	c.2019+744C>A		intron_variant	0.155 (24/147)
1	100050633	T	G	Cntnap5b	c.382-9T>G		intron_variant	0.154 (10/72)
2	153868182	C	A	Sun5	c.197+37G>T		intron_variant	0.153 (13/101)
16	38341606	G	C	Maats1	c.121+51C>G		intron_variant	0.153 (11/77)
2	162665771	A	G	9430021M05Rik	n.265-38A>G		intron_variant	0.152 (8/59)
8	104136832	T	G	Cdh5	c.1357+16T>G		intron_variant	0.152 (8/53)
11	59115646	C	G	Obscn	c.3676+13G>C		intron_variant	0.152 (14/105)
17	32777391	G	C	Zfp871	c.130+10C>G		intron_variant	0.15 (16/131)
11	42000202	C	T	Gabrg2	c.104+25G>A		intron_variant	0.149 (12/98)
17	35253154	C	A	Ddx39b	c.1122+46C>A		intron_variant	0.148 (8/62)
2	157252955	G	T	Mroh8	c.1101+9C>A		intron_variant	0.148 (25/157)
11	3227686	C	G	Eif4enif1	c.1097-20C>G		intron_variant	0.148 (10/69)
4	61798902	G	C	Gm13775	n.354+803G>C		intron_variant	0.147 (33/221)
2	43890371	C	A	Arhgap15	c.409-57C>A		intron_variant	0.145 (25/171)
2	181255841	C	A	Gmeb2	c.691+31G>T		intron_variant	0.145 (14/91)
9	97483113	A	G	Clstn2	c.1351-12T>C		intron_variant	0.145 (14/91)
1	74294009	C	A	Pnkd	c.353+6801C>A		intron_variant	0.145 (10/68)
3	84594389	C	G	Gm37240	c.-227-53767G>C		intron_variant	0.143 (19/117)
11	49635076	T	G	Flt4	c.2299+52T>G		intron_variant	0.143 (10/69)
2	113366838	T	C	Fmn1	c.1873+1009T>C		intron_variant	0.141 (30/218)
11	24722315	G	C	Gm12068	n.320-275G>C		intron_variant	0.141 (22/158)
1	176756229	C	A	Gm36992	n.53+1660C>A		intron_variant	0.139 (34/228)
5	72332664	T	C	Gm20647	n.357+2868T>C		intron_variant	0.139 (26/189)
11	30197787	C	G	Sptbn1	c.148+21792G>C		intron_variant	0.137 (9/66)
14	33012739	T	C	Wdfy4	c.7478+5803A>G		intron_variant	0.134 (10/84)
[truncated: 4,030 more rows]

## Sheet: Sheet2
CHROM	POS	REF	ALT	GENE	BASE PAIR CHANGE	AMINO ACID CHANGE	EFFECT	Mc38
6	48932468	A	C	1600015I10Rik	c.1646A>C	p.Lys549Thr	missense_variant	0.595 (57/95)
6	83161115	A	C	1700003E16Rik	c.222A>C	p.Lys74Asn	missense_variant	0.283 (14/54)
4	137454992	C	A	1700013G24Rik	c.457C>A	p.Pro153Thr	missense_variant	0.542 (31/58)
19	58787706	T	G	1700019N19Rik	c.314A>C	p.Lys105Thr	missense_variant	0.429 (9/21)
4	104913660	G	C	1700024P16Rik	c.171G>C	p.Gln57His	missense_variant	0.438 (8/23)
8	116973597	G	T	1700030J22Rik	c.65C>A	p.Thr22Lys	missense_variant	0.508 (40/77)
5	138563553	G	T	1700123K08Rik	c.370C>A	p.Gln124Lys	missense_variant	0.429 (99/244)
9	51291564	G	T	1810046K07Rik	c.289C>A	p.Pro97Thr	missense_variant	0.379 (13/36)
14	4348869	A	G	2610042L04Rik	c.29A>G	p.Glu10Gly	missense_variant	0.261 (65/253)
16	14049481	C	A	2900011O08Rik	c.202C>A	p.Arg68Ser	missense_variant	0.25 (8/27)
4	124610705	T	A	3100002H09Rik	c.53A>T	p.Asp18Val	missense_variant	0.321 (22/68)
17	33065657	C	A	4921501E09Rik	c.2170G>T	p.Asp724Tyr	missense_variant	0.43 (40/91)
6	50574021	G	T	4921507P07Rik	c.1447C>A	p.Leu483Ile	missense_variant	0.507 (93/182)
X	127394842	A	G	4921511C20Rik	c.403A>G	p.Lys135Glu	missense_variant	0.389 (15/38)
12	72916726	G	C	4930447C04Rik	c.54C>G	p.Phe18Leu	missense_variant	0.281 (10/42)
16	4866248	G	A	4930562C15Rik	c.3223G>A	p.Val1075Met	missense_variant	0.348 (27/88)
X	81420272	C	T	4930595M18Rik	c.1828G>A	p.Gly610Arg	missense_variant	0.444 (17/43)
7	104128918	T	A	4931431F19Rik	c.698A>T	p.Gln233Leu	missense_variant	0.321 (9/35)
8	87568574	G	T	4933402J07Rik	c.339G>T	p.Met113Ile	missense_variant	0.583 (60/103)
X	112241313	C	A	4933403O08Rik	c.637C>A	p.Arg213Ser	missense_variant	0.462 (14/31)
13	105111144	G	A	4933425L06Rik	c.971G>A	p.Gly324Asp	missense_variant	0.422 (31/74)
4	123860875	T	C	4933427I04Rik	c.581T>C	p.Leu194Pro	missense_variant	0.316 (14/43)
14	75036197	A	T	5031414D18Rik	c.848A>T	p.His283Leu	missense_variant	0.308 (10/31)
3	108471978	C	A	5330417C22Rik	c.1339G>T	p.Gly447Cys	missense_variant	0.676 (32/47)
3	108471435	C	A	5330417C22Rik	c.1352G>T	p.Trp451Leu	missense_variant	0.507 (44/85)
1	136219783	C	A	5730559C18Rik	c.1196G>T	p.Arg399Leu	missense_variant	0.421 (9/20)
9	107342527	G	T	6430571L13Rik	c.178G>T	p.Gly60Cys	missense_variant	0.353 (15/40)
12	100853304	A	C	9030617O03Rik	c.1364A>C	p.Lys455Thr	missense_variant	0.329 (33/91)
4	156122011	G	C	9430015G10Rik	c.227G>C	p.Gly76Ala	missense_variant	0.491 (33/67)
7	28154762	G	A	9530053A07Rik	c.5150G>A	p.Gly1717Asp	missense_variant	0.349 (18/55)
7	28142386	G	A	9530053A07Rik	c.1745G>A	p.Ser582Asn	missense_variant	0.313 (28/92)
2	155045720	C	G	a	c.99C>G	p.Asp33Glu	missense_variant	0.294 (12/38)
19	31918017	A	C	A1cf	c.499A>C	p.Ile167Leu	missense_variant	0.468 (32/73)
4	153960665	CG	C	A430005L14Rik	c.265delG	p.Val89fs	frameshift_variant	0.476 (22/49)
13	19729093	T	C	A530099J19Rik	c.788A>G	p.Asn263Ser	missense_variant	0.312 (25/88)
13	19729792	G	T	A530099J19Rik	c.89C>A	p.Ala30Glu	missense_variant	0.28 (24/89)
11	9335182	C	A	Abca13	c.9815C>A	p.Ala3272Glu	missense_variant	0.551 (79/146)
11	9335181	G	T	Abca13	c.9814G>T	p.Ala3272Ser	missense_variant	0.543 (81/147)
11	9294342	G	T	Abca13	c.6204G>T	p.Trp2068Cys	missense_variant	0.525 (60/117)
7	120246923	G	T	Abca14	c.1796G>T	p.Gly599Val	missense_variant	0.436 (29/66)
7	120346026	T	G	Abca15	c.1324T>G	p.Phe442Val	missense_variant	0.398 (53/138)
2	25444110	G	T	Abca2	c.5398G>T	p.Val1800Leu	missense_variant	0.354 (21/57)
3	122156443	C	A	Abca4	c.5415C>A	p.Ser1805Arg	missense_variant	0.508 (77/158)
3	122103488	G	T	Abca4	c.1815G>T	p.Trp605Cys	missense_variant	0.467 (53/112)
11	109961908	A	T	Abca8b	c.2281T>A	p.Cys761Ser	missense_variant	0.294 (17/56)
11	110135375	G	A	Abca9	c.2858C>T	p.Ala953Val	missense_variant	0.34 (39/117)
8	123982663	C	A	Abcb10	c.151G>T	p.Gly51Cys	missense_variant	0.636 (9/14)
12	118918272	C	A	Abcb5	c.1721G>T	p.Gly574Val	missense_variant	0.382 (18/47)
17	46313700	G	A	Abcc10	c.2350C>T	p.His784Tyr	missense_variant	0.442 (22/50)
11	94361275	C	G	Abcc3	c.2481G>C	p.Gln827His	missense_variant	0.556 (11/20)
11	84260720	G	C	Acaca	c.2443G>C	p.Ala815Pro	missense_variant	0.292 (17/59)
5	114248948	G	T	Acacb	c.7157G>T	p.Arg2386Leu	missense_variant	0.473 (29/62)
1	127745802	G	T	Acmsd	c.226G>T	p.Val76Phe	missense_variant	0.275 (31/116)
2	114051997	C	A	Actc1	c.35G>T	p.Cys12Phe	missense_variant	0.412 (9/20)
9	107931700	T	G	Actl11	c.3221T>G	p.Val1074Gly	missense_variant	0.358 (21/68)
3	32726543	A	C	Actl6a	c.1231A>C	p.Ile411Leu	missense_variant	0.431 (37/90)
17	33433101	C	A	Actl9	c.134C>A	p.Pro45Gln	missense_variant	0.471 (18/39)
12	70962029	C	A	Actr10	c.1235C>A	p.Ala412Glu	missense_variant	0.348 (32/86)
4	154666832	G	T	Actrt2	c.846C>A	p.Asn282Lys	missense_variant	0.55 (25/49)
2	58479868	C	A	Acvr1	c.128G>T	p.Gly43Val	missense_variant	0.281 (10/34)
19	3987107	G	T	Acy3	c.38G>T	p.Arg13Leu	missense_variant	0.407 (12/29)
12	81559743	T	G	Adam21	c.1244A>C	p.Asn415Thr	missense_variant	0.277 (36/121)
3	98162360	A	G	Adam30	c.1508A>G	p.Tyr503Cys	missense_variant	0.286 (16/51)
12	113545321	A	G	Adam6a	c.1313A>G	p.Lys438Arg	missense_variant	0.336 (56/161)
14	68527701	A	T	Adam7	c.246T>A	p.Ser82Arg	missense_variant	0.375 (16/39)
17	33528787	C	T	Adamts10	c.196C>T	p.Arg66Trp	missense_variant	0.556 (22/40)
17	33528788	G	T	Adamts10	c.197G>T	p.Arg66Leu	missense_variant	0.543 (23/40)
9	30910700	G	C	Adamts15	c.1440C>G	p.Cys480Trp	missense_variant	0.333 (15/44)
8	113743168	A	T	Adamts18	c.1901T>A	p.Ile634Asn	missense_variant	0.492 (77/147)
11	50792708	G	T	Adamts2	c.2816G>T	p.Arg939Leu	missense_variant	0.256 (12/48)
1	171258783	G	A	Adamts4	c.2143G>A	p.Ala715Thr	missense_variant	0.262 (15/59)
1	171258784	C	G	Adamts4	c.2144C>G	p.Ala715Gly	missense_variant	0.262 (15/59)
2	27081720	C	A	Adamtsl2	c.16C>A	p.Gln6Lys	missense_variant	0.308 (15/51)
11	7149536	C	A	Adcy1	c.2015C>A	p.Thr672Asn	missense_variant	0.576 (89/151)
16	35290185	C	G	Adcy5	c.2721C>G	p.Phe907Leu	missense_variant	0.444 (19/40)
6	86098590	G	T	Add2	c.720G>T	p.Lys240Asn	missense_variant	0.421 (16/41)
4	130017563	G	T	Adgrb2	c.3641G>T	p.Cys1214Phe	missense_variant	0.333 (32/89)
17	57361729	T	G	Adgre1	c.89T>G	p.Leu30Arg	missense_variant	0.357 (20/56)
X	56894702	G	T	Adgrg4	c.520G>T	p.Val174Leu	missense_variant	0.596 (34/56)
X	56914259	C	A	Adgrg4	c.1802C>A	p.Pro601His	missense_variant	0.489 (31/60)
14	66727628	C	A	Adra1a	c.1066C>A	p.Leu356Met	missense_variant	0.275 (11/46)
19	4287645	C	G	Adrbk1	c.1704G>C	p.Met568Ile	missense_variant	0.417 (13/27)
18	67431707	C	A	Afg3l2	c.696G>T	p.Leu232Phe	missense_variant	0.257 (11/44)
11	117834966	G	A	Afmid	c.385G>A	p.Asp129Asn	missense_variant	0.732 (67/86)
7	76418685	T	G	Agbl1	c.998T>G	p.Leu333Arg	missense_variant	0.288 (16/60)
4	111617242	TG	T	Agbl4	c.1232delG	p.Gly411fs	frameshift_variant	0.455 (52/106)
4	111526643	G	T	Agbl4	c.694G>T	p.Gly232Trp	missense_variant	0.508 (37/79)
1	43113190	A	G	AI597479	c.647A>G	p.His216Arg	missense_variant	0.317 (15/58)
4	134082660	C	A	Aim1l	c.3722C>A	p.Pro1241His	missense_variant	0.6 (30/51)
11	72030533	G	T	Aipl1	c.535C>A	p.Pro179Thr	missense_variant	0.565 (15/26)
7	75730552	G	T	Akap13	c.6629G>T	p.Arg2210Leu	missense_variant	0.326 (17/51)
12	53140444	C	G	Akap6	c.4640C>G	p.Thr1547Arg	missense_variant	0.385 (18/48)
17	32306549	C	A	Akap8	c.1555G>T	p.Val519Leu	missense_variant	0.337 (38/116)
1	65016687	C	A	Akr1cl	c.655G>T	p.Gly219Cys	missense_variant	0.265 (32/128)
9	106238769	G	A	Alas1	c.1045C>T	p.Arg349Cys	missense_variant	0.424 (44/100)
4	72852004	C	A	Aldoart1	c.566G>T	p.Arg189Leu	missense_variant	0.734 (82/109)
9	3345820	G	C	Alkbh8	c.539G>C	p.Gly180Ala	missense_variant	0.321 (45/142)
11	69157323	T	A	Alox12b	c.77T>A	p.Ile26Asn	missense_variant	0.852 (28/33)
11	69157325	G	C	Alox12b	c.79G>C	p.Val27Leu	missense_variant	0.852 (28/33)
11	69133079	C	A	Aloxe3	c.835C>A	p.Leu279Met	missense_variant	0.683 (30/47)
1	87099072	T	C	Alpi	c.1283A>G	p.Asn428Ser	missense_variant	0.272 (29/109)
3	127673438	T	A	Alpk1	c.3191A>T	p.His1064Leu	missense_variant	0.362 (39/104)
18	65305611	G	C	Alpk2	c.4111C>G	p.Leu1371Val	missense_variant	0.348 (8/27)
7	81078626	G	T	Alpk3	c.1503G>T	p.Leu501Phe	missense_variant	0.429 (24/50)
4	137754010	G	C	Alpl	c.330C>G	p.Ser110Arg	missense_variant	0.28 (10/31)
1	34589013	G	T	Amer3	c.2332G>T	p.Val778Leu	missense_variant	0.273 (11/42)
10	69991215	G	C	Ank3	c.5713G>C	p.Glu1905Gln	missense_variant	0.353 (16/41)
9	49421911	T	G	Ankk1	c.272A>C	p.Lys91Thr	missense_variant	0.313 (10/36)
5	110234499	G	C	Ankle2	c.340G>C	p.Glu114Gln	missense_variant	0.407 (39/100)
1	92878437	C	T	Ankmy1	c.2339G>A	p.Gly780Glu	missense_variant	0.302 (18/57)
12	36186859	T	G	Ankmy2	c.665T>G	p.Met222Arg	missense_variant	0.323 (22/74)
11	5615538	T	A	Ankrd36	c.1371T>A	p.Phe457Leu	missense_variant	0.611 (116/194)
1	161163283	C	T	Ankrd45	c.707C>T	p.Ala236Val	missense_variant	0.262 (29/113)
9	14781428	C	G	Ankrd49	c.439G>C	p.Ala147Pro	missense_variant	0.327 (24/69)
4	32824486	G	C	Ankrd6	c.426C>G	p.Asn142Lys	missense_variant	0.611 (13/21)
4	32806229	C	T	Ankrd6	c.2023G>A	p.Glu675Lys	missense_variant	0.585 (37/67)
16	4950714	T	G	Anks3	c.764A>C	p.Gln255Pro	missense_variant	0.34 (21/60)
6	125710707	G	T	Ano2	c.174G>T	p.Gln58His	missense_variant	0.469 (19/38)
10	89112945	A	T	Ano4	c.302T>A	p.Val101Glu	missense_variant	0.269 (23/93)
7	51574703	T	A	Ano5	c.1406T>A	p.Val469Glu	missense_variant	0.317 (19/53)
7	79827639	G	C	Anpep	c.2179C>G	p.Pro727Ala	missense_variant	0.254 (19/87)
11	101326420	G	T	Aoc2	c.1328G>T	p.Gly443Val	missense_variant	0.738 (51/72)
X	150572099	C	A	Apex2	c.1241G>T	p.Gly414Val	missense_variant	0.362 (23/59)
16	85024917	A	G	App	c.1169T>C	p.Leu390Pro	missense_variant	0.361 (16/41)
X	98151009	G	T	Ar	c.1228G>T	p.Gly410Trp	missense_variant	0.556 (12/22)
10	18591437	T	A	Arfgef3	c.6014A>T	p.Lys2005Met	missense_variant	0.288 (17/68)
10	18608358	C	A	Arfgef3	c.4148G>T	p.Cys1383Phe	missense_variant	0.261 (18/61)
2	91650214	C	T	Arhgap1	c.80C>T	p.Ala27Val	missense_variant	0.286 (16/51)
8	77277175	C	A	Arhgap10	c.2000G>T	p.Gly667Val	missense_variant	0.621 (23/39)
5	102875759	G	T	Arhgap24	c.658G>T	p.Val220Phe	missense_variant	0.311 (19/69)
5	102880807	G	A	Arhgap24	c.847G>A	p.Ala283Thr	missense_variant	0.294 (19/57)
6	87476186	G	T	Arhgap25	c.631C>A	p.Leu211Met	missense_variant	0.519 (18/34)
12	52518463	G	A	Arhgap5	c.2216G>A	p.Arg739His	missense_variant	0.397 (32/83)
9	42971072	T	A	Arhgef12	c.4475A>T	p.Gln1492Leu	missense_variant	0.304 (10/29)
8	3453224	G	T	Arhgef18	c.2629G>T	p.Val877Leu	missense_variant	0.35 (10/27)
12	71039920	A	C	Arid4a	c.531A>C	p.Lys177Asn	missense_variant	0.547 (36/68)
13	54580724	C	G	Arl10	c.562C>G	p.Leu188Val	missense_variant	0.333 (8/24)
3	69222648	C	A	Arl14	c.127C>A	p.Pro43Thr	missense_variant	0.256 (25/99)
10	41963656	C	G	Armc2	c.1312G>C	p.Gly438Arg	missense_variant	0.429 (15/34)
18	7129487	G	C	Armc4	c.2690C>G	p.Ala897Gly	missense_variant	0.408 (22/55)
X	134694091	G	A	Armcx4	c.4747G>A	p.Glu1583Lys	missense_variant	0.5 (17/34)
7	84263196	G	A	Arnt2	c.1735C>T	p.Pro579Ser	missense_variant	0.412 (8/18)
7	101578882	T	A	Art2b	c.848A>T	p.Gln283Leu	missense_variant	0.34 (24/67)
6	24566331	G	T	Asb15	c.1282G>T	p.Asp428Tyr	missense_variant	0.41 (37/94)
3	89043217	G	A	Ash1l	c.6416G>A	p.Arg2139Gln	missense_variant	0.564 (27/45)
11	80889832	A	T	Asic2	c.1250T>A	p.Leu417Gln	missense_variant	0.708 (56/79)
18	22522220	G	T	Asxl3	c.3286G>T	p.Gly1096Cys	missense_variant	0.381 (9/25)
7	130504714	C	A	Ate1	c.916G>T	p.Asp306Tyr	missense_variant	0.273 (13/53)
6	114673050	G	T	Atg7	c.187G>T	p.Val63Phe	missense_variant	0.397 (35/84)
1	75186559	A	T	Atg9a	c.872T>A	p.Leu291Gln	missense_variant	0.296 (12/33)
4	141005117	A	T	Atp13a2	c.2692A>T	p.Ser898Cys	missense_variant	0.69 (24/33)
X	73535424	G	A	Atp2b3	c.1027G>A	p.Glu343Lys	missense_variant	0.409 (10/25)
6	38049036	G	A	Atp6v0a4	c.2456C>T	p.Ser819Phe	missense_variant	0.255 (19/72)
6	120804119	T	C	Atp6v1e1	c.290A>G	p.Glu97Gly	missense_variant	0.458 (54/115)
1	5095628	G	C	Atp6v1h	c.320G>C	p.Arg107Pro	missense_variant	0.286 (64/219)
8	22028714	G	T	Atp7b	c.107C>A	p.Pro36His	missense_variant	0.787 (55/70)
4	43361903	A	T	Atp8b5	c.1948A>T	p.Arg650Trp	missense_variant	0.5 (40/86)
18	80765865	T	A	Atp9b	c.1838A>T	p.Gln613Leu	missense_variant	0.344 (11/34)
11	60416775	C	A	Atpaf2	c.136G>T	p.Ala46Ser	missense_variant	0.5 (13/24)
5	121777990	A	T	Atxn2	c.1258A>T	p.Ser420Cys	missense_variant	0.609 (35/61)
3	108205666	A	C	Atxn7l2	c.925T>G	p.Ser309Ala	missense_variant	0.369 (40/103)
6	83056633	G	T	Aup1	c.917G>T	p.Arg306Leu	missense_variant	0.533 (33/64)
4	155832763	G	T	Aurkaip1	c.467G>T	p.Arg156Leu	missense_variant	0.442 (28/57)
7	6995514	TG	T	Aurkc	c.74delG	p.Gly25fs	frameshift_variant	0.3 (45/132)
6	56736764	G	C	Avl9	c.1006G>C	p.Asp336His	missense_variant	0.556 (28/53)
1	131609573	C	A	Avpr1b	c.1094C>A	p.Ser365Tyr	missense_variant	0.406 (14/36)
11	120276609	G	T	Bahcc1	c.3835G>T	p.Gly1279Trp	missense_variant	0.704 (22/30)
2	118922403	G	A	Bahd1	c.2150G>A	p.Arg717His	missense_variant	0.409 (12/28)
17	25244768	C	A	Baiap3	c.2802G>T	p.Arg934Ser	missense_variant	0.412 (10/20)
10	111299657	G	T	Bbs10	c.630G>T	p.Leu210Phe	missense_variant	0.37 (59/153)
12	4851785	C	A	BC068281	c.1640C>A	p.Thr547Lys	missense_variant	0.452 (18/38)
11	118333873	T	G	BC100451	c.144A>C	p.Gln48His	missense_variant	0.571 (18/33)
7	25631143	T	C	Bckdha	c.1027A>G	p.Ser343Gly	missense_variant	0.4 (17/43)
16	23969958	C	G	Bcl6	c.1659G>C	p.Gln553His	missense_variant	0.48 (15/31)
10	117024622	T	G	Best3	c.1786T>G	p.Leu596Val	missense_variant	0.512 (27/50)
3	141842954	C	A	Bmpr1b	c.1314G>T	p.Glu438Asp	missense_variant	0.536 (36/63)
7	81974542	T	G	Bnc1	c.936A>C	p.Glu312Asp	missense_variant	0.377 (23/64)
6	134710123	A	T	Borcs5	c.443A>T	p.Gln148Leu	missense_variant	0.333 (10/32)
2	153942832	A	C	Bpifb4	c.459A>C	p.Glu153Asp	missense_variant	0.293 (12/43)
10	85965228	C	A	Bpifc	c.1255G>T	p.Ala419Ser	missense_variant	0.267 (28/111)
11	107058684	C	A	Bptf	c.6808G>T	p.Gly2270Trp	missense_variant	0.667 (18/28)
6	39643182	C	A	Braf	c.1461G>T	p.Trp487Cys	missense_variant	0.457 (63/146)
2	27459694	GC	G	Brd3	c.845delG	p.Gly282fs	frameshift_variant	0.22 (12/50)
13	73944751	G	C	Brd9	c.859G>C	p.Ala287Pro	missense_variant	0.333 (8/25)
4	136882145	C	G	C1qb	c.163G>C	p.Gly55Arg	missense_variant	0.65 (32/50)
17	34731147	A	T	C4b	c.4148T>A	p.Leu1383Gln	missense_variant	0.514 (49/92)
4	144207199	CTG	C	C87977	c.1335_1336delCA	p.His445fs	frameshift_variant	0.538 (174/323)
4	144207461	A	G	C87977	c.1075T>C	p.Phe359Leu	missense_variant	0.291 (34/117)
4	104862686	C	A	C8a	c.226G>T	p.Gly76Cys	missense_variant	0.518 (51/97)
11	4746669	T	G	Cabp7	c.59A>C	p.Asn20Thr	missense_variant	0.286 (12/38)
14	30111116	C	T	Cacna1d	c.2767G>A	p.Ala923Thr	missense_variant	0.419 (15/36)
14	30179188	A	G	Cacna1d	c.974T>C	p.Phe325Ser	missense_variant	0.389 (18/46)
9	107526102	C	A	Cacna2d2	c.2779C>A	p.Leu927Met	missense_variant	0.419 (22/50)
6	119312450	G	T	Cacna2d4	c.2519G>T	p.Arg840Met	missense_variant	0.619 (18/29)
11	107877546	G	T	Cacng5	c.634C>A	p.Pro212Thr	missense_variant	1.0 (12/12)
11	96103520	C	A	Calcoco2	c.206G>T	p.Trp69Leu	missense_variant	0.77 (113/146)
1	193362100	C	A	Camk1g	c.5G>T	p.Gly2Val	missense_variant	0.261 (17/66)
14	20764912	C	A	Camk2g	c.645G>T	p.Trp215Cys	missense_variant	0.355 (37/96)
2	25936639	C	T	Camsap1	c.3778G>A	p.Ala1260Thr	missense_variant	0.293 (16/49)
4	151144385	G	T	Camta1	c.1989C>A	p.His663Gln	missense_variant	0.5 (14/24)
19	6014278	C	G	Capn1	c.190G>C	p.Val64Leu	missense_variant	0.731 (20/29)
17	73341110	G	T	Capn13	c.894C>A	p.Ser298Arg	missense_variant	0.348 (53/145)
X	143810907	C	G	Capn6	c.235G>C	p.Gly79Arg	missense_variant	0.31 (22/69)
X	164000310	G	T	Car5b	c.269C>A	p.Ala90Asp	missense_variant	1.0 (24/24)
8	104548959	G	T	Car7	c.539G>T	p.Cys180Phe	missense_variant	0.4 (8/21)
19	18704090	G	C	Carnmt1	c.1172G>C	p.Cys391Ser	missense_variant	0.69 (95/142)
19	18679213	C	G	Carnmt1	c.509C>G	p.Ala170Gly	missense_variant	0.256 (24/94)
X	13533489	C	T	Cask	c.2353G>A	p.Val785Ile	missense_variant	0.4 (18/47)
17	24505038	C	A	Caskin1	c.2799C>A	p.Asn933Lys	missense_variant	0.441 (16/37)
11	115803620	C	A	Caskin2	c.1154G>T	p.Gly385Val	missense_variant	0.333 (11/31)
6	17281433	G	T	Cav2	c.73G>T	p.Val25Phe	missense_variant	0.431 (24/55)
1	74910747	G	A	Ccdc108	c.3598C>T	p.Arg1200Cys	missense_variant	0.356 (21/59)
8	95538219	G	T	Ccdc113	c.356G>T	p.Arg119Leu	missense_variant	0.591 (32/52)
16	34706498	G	T	Ccdc14	c.916G>T	p.Gly306Cys	missense_variant	0.257 (32/126)
3	36018888	T	C	Ccdc144b	c.1244A>G	p.Gln415Arg	missense_variant	0.328 (23/69)
9	21990424	C	A	Ccdc151	c.1639G>T	p.Val547Phe	missense_variant	0.4 (13/29)
4	83795230	G	A	Ccdc171	c.3505G>A	p.Ala1169Thr	missense_variant	0.362 (21/62)
4	45920910	A	C	Ccdc180	c.2855A>C	p.Lys952Thr	missense_variant	0.407 (12/32)
4	45916406	A	C	Ccdc180	c.2606A>C	p.Lys869Thr	missense_variant	0.39 (21/50)
9	58117416	G	A	Ccdc33	c.526C>T	p.Pro176Ser	missense_variant	0.387 (12/32)
8	129026663	G	T	Ccdc7a	c.586C>A	p.Arg196Ser	missense_variant	0.558 (72/133)
16	45096207	G	A	Ccdc80	c.1325G>A	p.Ser442Asn	missense_variant	0.35 (8/24)
17	55960732	T	C	Ccdc94	c.44T>C	p.Phe15Ser	missense_variant	0.516 (81/166)
5	36485594	C	G	Ccdc96	c.943C>G	p.Arg315Gly	missense_variant	0.387 (13/38)
4	43985018	A	T	Ccin	c.1424A>T	p.Gln475Leu	missense_variant	0.861 (36/43)
14	50792104	C	A	Ccnb1ip1	c.500G>T	p.Arg167Leu	missense_variant	0.324 (13/45)
X	7009375	T	C	Ccnb3	c.964A>G	p.Thr322Ala	missense_variant	0.443 (30/68)
11	99144980	G	T	Ccr7	c.1115C>A	p.Thr372Asn	missense_variant	0.406 (15/39)
7	140224857	A	T	Cd163l1	c.1772A>T	p.His591Leu	missense_variant	0.4 (11/28)
7	24746171	G	T	Cd177	c.1846C>A	p.Gln616Lys	missense_variant	0.444 (14/33)
13	102705766	C	T	Cd180	c.1319C>T	p.Pro440Leu	missense_variant	0.368 (16/41)
3	86998241	TC	T	Cd1d1	c.443delG	p.Gly148fs	frameshift_variant	0.484 (56/116)
16	44792759	A	T	Cd200r1	c.727A>T	p.Ile243Phe	missense_variant	0.522 (94/179)
8	3849196	C	T	Cd209e	c.515G>A	p.Gly172Glu	missense_variant	0.358 (35/93)
1	180065093	A	G	Cdc42bpa	c.821A>G	p.Glu274Gly	missense_variant	0.25 (36/125)
1	110893306	T	G	Cdh19	c.1701A>C	p.Gln567His	missense_variant	0.271 (19/66)
1	110932214	C	G	Cdh19	c.536G>C	p.Gly179Ala	missense_variant	0.261 (15/62)
10	60428321	T	C	Cdh23	c.2047A>G	p.Asn683Asp	missense_variant	0.396 (25/68)
10	60310770	T	A	Cdh23	c.8629A>T	p.Asn2877Tyr	missense_variant	0.304 (8/27)
12	33060322	G	T	Cdhr3	c.962C>A	p.Pro321His	missense_variant	0.25 (13/55)
5	3390694	T	A	Cdk6	c.247T>A	p.Cys83Ser	missense_variant	0.363 (65/183)
17	35556071	T	A	Cdsn	c.1496T>A	p.Leu499Gln	missense_variant	0.564 (27/51)
13	35815966	C	T	Cdyl	c.229C>T	p.Arg77Trp	missense_variant	0.397 (29/70)
7	16675583	G	T	Ceacam15	c.26C>A	p.Pro9His	missense_variant	0.314 (11/38)
4	141821391	G	T	Cela2a	c.433C>A	p.Pro145Thr	missense_variant	0.436 (33/69)
3	108412341	G	T	Celsr2	c.3154C>A	p.His1052Asn	missense_variant	0.368 (18/45)
1	189659472	G	A	Cenpf	c.2162C>T	p.Thr721Ile	missense_variant	0.5 (42/76)
18	67881288	A	T	Cep192	c.7352A>T	p.Lys2451Met	missense_variant	0.352 (60/169)
16	55927735	C	A	Cep97	c.331G>T	p.Gly111Cys	missense_variant	0.289 (25/99)
8	93036085	C	A	Ces1a	c.557G>T	p.Arg186Leu	missense_variant	0.544 (79/145)
8	93325811	G	T	Ces1g	c.849C>A	p.His283Gln	missense_variant	0.55 (109/192)
8	105053602	A	C	Ces3a	c.980A>C	p.Lys327Thr	missense_variant	0.336 (88/260)
X	72914889	T	G	Cetn2	c.380A>C	p.Lys127Thr	missense_variant	0.58 (34/59)
8	95434525	C	T	Cfap20	c.47G>A	p.Ser16Asn	missense_variant	0.35 (8/23)
4	34719661	G	C	Cfap206	c.752C>G	p.Pro251Arg	missense_variant	0.556 (43/78)
4	155426118	C	G	Cfap74	c.1159C>G	p.Arg387Gly	missense_variant	0.422 (26/61)
3	94779432	GC	G	Cgn	c.558delG	p.Gln187fs	frameshift_variant	0.206 (10/40)
17	15768733	G	T	Chd1	c.4747G>T	p.Gly1583Cys	missense_variant	0.403 (29/76)
6	125101598	G	T	Chd4	c.703G>T	p.Ala235Ser	missense_variant	0.308 (9/31)
4	152378479	G	A	Chd5	c.4199G>A	p.Arg1400Lys	missense_variant	0.476 (29/62)
8	72470953	C	T	Cherp	c.302G>A	p.Gly101Asp	missense_variant	0.585 (29/47)
14	66149304	C	A	Chrna2	c.898C>A	p.Leu300Met	missense_variant	0.333 (25/71)
9	55004482	G	T	Chrna5	c.478G>T	p.Gly160Cys	missense_variant	0.326 (31/95)
10	60185676	T	A	Chst3	c.1366A>T	p.Arg456Trp	missense_variant	0.37 (13/33)
7	66172226	C	G	Chsy1	c.2208C>G	p.Ser736Arg	missense_variant	0.351 (15/41)
8	72207139	AG	A	Cib3	c.252delC	p.Phe85fs	frameshift_variant	0.593 (41/68)
12	86960337	G	T	Cipc	c.307G>T	p.Gly103Cys	missense_variant	0.323 (13/38)
5	115986603	G	C	Cit	c.4621G>C	p.Gly1541Arg	missense_variant	0.485 (49/94)
8	22169794	G	A	Ckap2	c.1670C>T	p.Pro557Leu	missense_variant	0.508 (71/143)
3	145013921	G	T	Clca1	c.1287C>A	p.Ser429Arg	missense_variant	0.368 (19/47)
9	99698847	T	A	Cldn18	c.347A>T	p.Lys116Met	missense_variant	0.283 (24/79)
8	35826277	A	T	Cldn23	c.56T>A	p.Leu19Gln	missense_variant	0.444 (10/21)
6	123274686	T	G	Clec4d	c.526T>G	p.Phe176Val	missense_variant	0.29 (49/160)
17	35052459	G	T	Clic1	c.64G>T	p.Gly22Trp	missense_variant	0.465 (24/53)
7	30298838	A	C	Clip3	c.708A>C	p.Glu236Asp	missense_variant	0.325 (17/50)
11	86702632	A	G	Cltc	c.4586T>C	p.Val1529Ala	missense_variant	0.257 (49/186)
5	113613891	T	A	Cmklr1	c.1048A>T	p.Ser350Cys	missense_variant	0.324 (15/39)
13	93096790	C	G	Cmya5	c.1789G>C	p.Asp597His	missense_variant	0.343 (52/152)
4	134232135	A	T	Cnksr1	c.1187T>A	p.Leu396Gln	missense_variant	0.455 (12/26)
11	101182898	C	A	Cntnap1	c.1874C>A	p.Thr625Lys	missense_variant	0.733 (12/18)
13	64792388	T	G	Cntnap3	c.994A>C	p.Asn332His	missense_variant	0.388 (22/57)
1	100164228	C	A	Cntnap5b	c.1635C>A	p.Ser545Arg	missense_variant	0.257 (41/166)
11	12375827	G	A	Cobl	c.668C>T	p.Ala223Val	missense_variant	0.733 (37/53)
11	12253433	G	T	Cobl	c.3268C>A	p.Gln1090Lys	missense_variant	0.574 (28/48)
11	12369645	C	A	Cobl	c.732G>T	p.Glu244Asp	missense_variant	0.286 (26/96)
11	113651982	C	A	Cog1	c.453C>A	p.His151Gln	missense_variant	0.708 (19/26)
11	88981976	C	A	Coil	c.1162C>A	p.Pro388Thr	missense_variant	0.611 (11/20)
10	34395178	C	A	Col10a1	c.1145C>A	p.Pro382His	missense_variant	0.412 (8/22)
17	34056402	G	T	Col11a2	c.2299G>T	p.Gly767Cys	missense_variant	0.455 (11/23)
10	77112851	C	A	Col18a1	c.826G>T	p.Ala276Ser	missense_variant	0.343 (15/41)
11	51549708	G	T	Col23a1	c.424G>T	p.Asp142Tyr	missense_variant	0.485 (39/84)
3	145342498	G	A	Col24a1	c.1855G>A	p.Gly619Ser	missense_variant	0.435 (27/63)
3	130182795	AC	A	Col25a1	c.329delC	p.Thr110fs	frameshift_variant	0.397 (35/99)
1	45396484	C	G	Col5a2	c.2090G>C	p.Gly697Ala	missense_variant	0.4 (15/36)
1	45383680	C	A	Col5a2	c.3376G>T	p.Gly1126Cys	missense_variant	0.371 (15/45)
1	45376146	C	A	Col5a2	c.4432G>T	p.Val1478Leu	missense_variant	0.29 (12/41)
9	106000797	T	C	Col6a4	c.5980A>G	p.Ser1994Gly	missense_variant	0.444 (9/20)
12	28595284	C	A	Colec11	c.387G>T	p.Gln129His	missense_variant	0.333 (30/94)
4	21899102	C	A	Coq3	c.434C>A	p.Pro145His	missense_variant	0.702 (94/133)
7	4752147	C	A	Cox6b2	c.127G>T	p.Val43Leu	missense_variant	0.404 (26/60)
5	71442984	TG	T	Cox7b2	c.229delC	p.Gln77fs	frameshift_variant	0.32 (16/56)
1	67148719	CT	C	Cps1	c.540delT	p.Lys182fs	frameshift_variant	0.247 (24/103)
1	67123268	G	T	Cps1	c.104G>T	p.Gly35Val	missense_variant	0.267 (36/139)
1	17752851	G	T	Crispld1	c.1141G>T	p.Ala381Ser	missense_variant	0.284 (27/86)
19	42287926	T	G	Crtac1	c.1562A>C	p.Glu521Ala	missense_variant	0.696 (19/27)
10	85144197	C	A	Cry1	c.1246G>T	p.Val416Leu	missense_variant	0.333 (10/34)
3	154621769	A	T	Cryz	c.829A>T	p.Thr277Ser	missense_variant	0.321 (33/92)
8	15998814	T	C	Csmd1	c.6887A>G	p.Asp2296Gly	missense_variant	0.452 (27/59)
8	16037198	T	A	Csmd1	c.5836A>T	p.Thr1946Ser	missense_variant	0.356 (23/58)
4	120542743	G	C	Ctps	c.1416C>G	p.Asp472Glu	missense_variant	0.3 (39/130)
13	61037123	C	A	Ctsq	c.748G>T	p.Val250Leu	missense_variant	0.325 (16/49)
2	13381825	T	A	Cubn	c.4628A>T	p.Glu1543Val	missense_variant	0.257 (23/82)
5	121885934	G	T	Cux2	c.275C>A	p.Thr92Lys	missense_variant	0.474 (9/19)
X	9440001	G	A	Cybb	c.1480C>T	p.His494Tyr	missense_variant	0.5 (22/48)
X	111123146	G	A	Cylc1	c.1195G>A	p.Val399Ile	missense_variant	0.571 (11/17)
15	74839355	T	A	Cyp11b1	c.473A>T	p.Lys158Ile	missense_variant	0.711 (79/108)
9	57700594	C	A	Cyp1a1	c.504C>A	p.Ser168Arg	missense_variant	0.36 (34/91)
7	26310841	C	T	Cyp2a4	c.790C>T	p.Pro264Ser	missense_variant	0.395 (20/56)
7	26835497	A	C	Cyp2a5	c.134A>C	p.Asn45Thr	missense_variant	0.362 (26/74)
7	26836774	G	A	Cyp2a5	c.443G>A	p.Arg148His	missense_variant	0.311 (16/51)
19	39324997	G	A	Cyp2c29	c.1053G>A	p.Met351Ile	missense_variant	0.986 (80/81)
19	39035513	C	T	Cyp2c55	c.1030C>T	p.Arg344Cys	missense_variant	0.987 (90/91)
4	96307436	G	T	Cyp2j11	c.1022C>A	p.Ser341Tyr	missense_variant	0.32 (49/160)
4	96629506	G	T	Cyp2j5	c.1468C>A	p.Pro490Thr	missense_variant	0.326 (37/114)
17	43731048	A	C	Cyp39a1	c.1145A>C	p.Glu382Ala	missense_variant	0.438 (61/142)
17	43725577	A	C	Cyp39a1	c.997A>C	p.Ile333Leu	missense_variant	0.289 (19/59)
4	115518326	G	T	Cyp4a10	c.5G>T	p.Ser2Ile	missense_variant	0.496 (83/168)
4	115496099	TA	T	Cyp4a14	c.14delT	p.Leu5fs	frameshift_variant	0.522 (17/32)
4	115490017	G	C	Cyp4a14	c.1223C>G	p.Ala408Gly	missense_variant	0.557 (59/108)
4	115470959	G	T	Cyp4a30b	c.1424G>T	p.Arg475Leu	missense_variant	0.453 (56/129)
X	39863555	T	C	Cypt14	c.29A>G	p.Lys10Arg	missense_variant	0.538 (35/67)
X	39346384	A	C	Cypt15	c.98A>C	p.Lys33Thr	missense_variant	0.493 (44/91)
X	105499799	G	T	Cypt2	c.8G>T	p.Arg3Leu	missense_variant	0.667 (16/24)
13	24883848	G	T	D130043K22Rik	c.2566G>T	p.Val856Leu	missense_variant	0.289 (13/47)
1	186968983	C	G	D1Pas1	c.1108C>G	p.Pro370Ala	missense_variant	0.287 (38/128)
7	125812905	G	T	D430042O09Rik	c.1063G>T	p.Val355Phe	missense_variant	0.276 (11/37)
[truncated: 1,178 more rows]

## Sheet: Sheet3
CHROM	POS	REF	ALT	GENE	TRANSCRIPT	BASE PAIR CHANGE	AMINO ACID CHANGE	EFFECT	PAR clone 1	PAR clone 2	HF1* clone 1	HF1* clone 2	G12C	G12R	G13D1	G13D2
[truncated: 106 more rows]
