# Supplementary material for: An In Vivo Kras Allelic Series Reveals Distinct Phenotypes of Common Oncogenic Variants
Source: Oxford University Press journal article supplement (doi:10.1158/2159-8290.cd-20-0442), 2020-08-12
Supplement: 21598290cd200442-sup-240834_2_supp_6404218_qd0276.xlsx [file 21598290cd200442-sup-240834_2_supp_6404218_qd0276.xlsx]

## Sheet: DE_G12DvsWT_results
Gene	baseMean	log2FoldChange	lfcSE	stat	pvalue	padj	G12C_A	G12C_B	G12C_C	G12D_A	G12D_B	G12D_C	G12R_A	G12R_B	G12R_C	G13D_A	G13D_B	G13D_C	WT_A	WT_B	WT_C
Gap43	4341.9	6.16404	0.300675	20.5007	2.12159e-93	3.02497e-89	9097.12	6175.69	11335.3	6288.58	8716.53	6925.58	3773.77	2483.84	3585.82	2193.07	1983.31	2261.82	85.6218	151.412	71.0246
Ccdc80	3780.12	-4.07293	0.364895	-11.1619	6.2632e-29	4.46504e-25	1049.94	1107.09	745.87	711.882	697.52	676.118	1999.69	3946.12	2417.15	3565.72	1643.79	3042.26	17178.9	10939.5	6980.32
Arhgap6	398.754	4.45138	0.409372	10.8737	1.53873e-27	7.31308e-24	569.718	367.556	569.583	563.828	1573.33	633.573	415.666	251.029	456.172	154.071	178.566	121.786	48.7994	42.9388	34.6927
Marcks	6822.05	-1.97538	0.194108	-10.1767	2.51941e-24	8.98043e-21	6078.16	5108.16	5996.09	3115.62	3190.68	3473.8	4278.48	7280.08	6138.88	6728.88	6350.19	6133.26	11046.1	15184.9	12227.4
Fam110c	298.572	5.732	0.576635	9.94043	2.77616e-23	7.91651e-20	581.496	289.578	336.892	590.585	391.69	720.734	226.778	109.073	129.057	360.667	499.615	210.118	1.99281	7.53753	22.7699
2610507B11Rik	8549.74	0.776218	0.0824236	9.41743	4.62278e-21	1.09853e-17	9625.41	10378.3	9004.73	9580.65	9766.04	9981.32	9492.51	8979.53	8795.92	7996.86	9010.96	8510.49	5854.47	5661.09	5607.86
1810011O10Rik	298.001	3.97825	0.428168	9.29134	1.52364e-20	2.71551e-17	479.479	298.002	486.845	480.556	624.081	637.458	365.771	198.594	208.687	142.317	304.947	132.444	18.9317	38.7644	53.1298
Lurap1l	2265.03	-2.77182	0.297928	-9.30365	1.35709e-20	2.71551e-17	1324.18	1495.28	1630.48	826.631	495.704	650.346	2169.55	2076.49	2282.75	3003.28	1737.62	2810.21	3648.83	6622.26	3201.88
Rps6ka6	305.749	3.34112	0.369648	9.03866	1.58607e-19	2.51269e-16	460.375	382.28	468.249	588.625	514.763	490.363	256.339	224.359	360.036	174.133	287.579	221.661	56.1809	20.8033	80.4857
Slc1a6	376.967	-7.65989	0.866588	-8.83914	9.64623e-19	1.25033e-15	27.5445	34.7494	122.961	0.940422	7.49647	12.888	311.428	401.305	71.393	178.384	118.91	67.7158	2922.45	1035.87	340.464
Slco4a1	995.876	4.88727	0.552703	8.84248	9.36131e-19	1.25033e-15	632.351	1326.71	407.937	2345.09	1433.54	2585.04	2550.22	529.409	1191.19	273.223	775.205	673.319	85.965	62.4947	66.443
Smarcd3	560.604	-1.25364	0.14364	-8.72762	2.60092e-18	3.09032e-15	456.586	374.46	399.752	373.779	362.636	397.486	640.301	561.103	626.789	487.425	551.788	471.956	835.271	831.299	1038.44
Lonrf3	156.61	4.13778	0.478963	8.63904	5.66883e-18	6.21739e-15	200.463	208.507	164.426	352.435	188.464	309.994	170.81	77.4474	190.95	77.8015	230.756	128.7	19.1023	15.4826	13.8159
Acsl6	302.09	3.89338	0.458229	8.49658	1.95251e-17	1.98849e-14	664.326	267.552	524.557	735.592	398.513	516.085	272.63	154.119	298.93	130.72	254.226	199.905	27.17	23.8308	63.2016
Sele	135.447	3.97876	0.471563	8.43738	3.24523e-17	3.0847e-14	138.743	179.012	99.9681	295.292	196.782	204.224	277.986	100.841	177.567	108.2	109.321	99.5821	14.9461	5.38395	23.8542
Gm8430	866.628	10.9457	1.30114	8.41242	4.01639e-17	3.36857e-14	1255.83	907.697	2029.35	198.429	243.635	702.889	2061.91	553.595	949.161	1030.34	1464.32	1602.28	0	0	0
Upp1	323.146	4.69169	0.557272	8.41903	3.79624e-17	3.36857e-14	644.443	347.969	234.144	912.636	533.952	518.727	438.557	185.163	180.189	256.281	294.257	224.093	7.58974	48.0571	21.135
Serpine1	13453.1	-2.58026	0.307217	-8.39883	4.5096e-17	3.57211e-14	5590.88	8356.79	9117.92	5835.46	4136.15	4018.19	15109.4	9641.28	15274	12977.2	8868.23	19204.9	31483.1	29577.5	22605.5
Ptpn5	113.657	6.91405	0.832917	8.30101	1.03231e-16	7.74669e-14	180.466	151.546	117.894	185.156	220.215	231.849	86.69	81.243	54.886	128.596	228.13	32.8431	0.99845	1.07905	3.2595
Fam150a	182.181	-5.93191	0.73805	-8.03728	9.18562e-16	6.25461e-13	48.9681	44.2265	102.967	16.9276	2.81118	5.94829	129.588	116.275	60.4095	352.869	57.5372	224.06	268.033	329.498	972.601
Inpp5a	1295.99	-1.12526	0.140011	-8.03692	9.21214e-16	6.25461e-13	960.217	1116.62	1138.9	1003.41	836.173	856.148	1283.03	1103.38	1306.58	1327.11	1155.39	1473.13	1898.48	1889.7	2091.59
Serpinb2	490.706	6.30422	0.790878	7.97117	1.57183e-15	1.01869e-12	584.966	194.438	464.396	520.943	316.913	900.896	721.539	367.472	65.8242	533.342	2140.24	527.49	9.35542	7.43278	5.34607
Sh3bgrl2	1352.43	3.92338	0.499686	7.8517	4.10437e-15	2.54436e-12	1764.01	1188.9	1629	3162.67	4252.51	1283.72	1858.02	701.503	995.027	619.207	1375.94	881.009	321.006	119.272	134.668
Fbln5	187.491	-3.32577	0.427237	-7.78438	7.00575e-15	4.162e-12	73.4521	145.316	65.9789	64.8891	61.8459	36.6811	95.1006	167.725	97.9365	163.762	57.5372	142.402	556.99	531.934	550.815
Adamts5	1390.25	-3.14529	0.408718	-7.69549	1.40952e-14	8.03878e-12	453.975	744.48	391.875	436.356	200.531	443.147	1026.25	1484.83	1190.8	2446.69	1455.69	1024.7	4702.03	2458.31	2394.09
Eya1	506.634	-3.63136	0.476328	-7.62365	2.46605e-14	1.34264e-11	158.304	407.701	232.865	126.838	55.4965	118.164	605.216	655.697	660.603	295.651	106.754	451.275	1327.07	1466.28	931.59
Slc6a15	373.301	4.72355	0.619912	7.61971	2.54252e-14	1.34264e-11	585.125	513.316	679.739	626.506	741.027	320.991	298.132	130.454	531.682	634.22	135.89	338.366	8.97635	37.7243	17.3654
Jag1	635.59	-2.23572	0.295749	-7.5595	4.04626e-14	2.06041e-11	362.186	333.603	363.051	197.871	258.309	316.223	610.17	924.754	949.352	486.993	497.515	596.064	711.579	1322.14	1604.05
Spint1	62.4437	5.68866	0.754194	7.5427	4.60326e-14	2.26321e-11	70.1245	44.3278	19.0229	231.626	139.559	147.931	65.8493	47.4637	20.9719	40.2141	69.342	29.7497	6.08679	0	4.3872
Mmp3	10333.2	5.56133	0.746985	7.44504	9.69154e-14	4.60607e-11	7565.57	31041.8	12268.1	15398.5	36074.9	4549.45	13199.1	8138.25	2208.61	9431.93	4224.19	9711.25	270.025	747.292	169.148
Jph1	208.076	3.02254	0.406857	7.429	1.0942e-13	5.03263e-11	164.925	191.514	134.677	432.263	160.2	423.895	289.627	368.347	208.744	283.28	164.256	174.404	53.2553	35.2301	36.5186
Nes	7338.04	2.83759	0.382719	7.4143	1.22273e-13	5.44803e-11	11855.1	6749	7434.65	10457	13556.1	9483.57	9522.66	4979.06	6201.35	4772.14	13162.9	7211.39	2064.06	1116.43	1505.2
Igfbp2	148.03	-8.97717	1.21442	-7.39215	1.44474e-13	6.24215e-11	5.52523	3.42187	2.16571	2.03733	2.27411	0	4.52804	42.3547	2.22129	5.27939	4.15495	7.71038	1237.96	846.791	54.0267
Hhipl1	85.3427	-2.87629	0.389942	-7.3762	1.62874e-13	6.83017e-11	28.5647	33.6964	30.9901	41.3786	32.797	32.7156	32.3969	76.145	51.2565	48.7388	36.4402	49.7911	230.169	169.056	386.004
Mcpt8	335.862	4.92208	0.669584	7.35094	1.96811e-13	8.01753e-11	839.598	318.01	196.937	618.798	264.25	560.13	420.115	175.957	71.393	673.57	541.808	309.7	11.9568	9.69111	26.0228
Avpr1a	168.756	-8.03822	1.09846	-7.31775	2.52172e-13	9.98741e-11	3.0605	24.2193	23.9923	0.940422	4.68529	0.991381	18.8111	151.261	410.967	30.218	40.276	74.6866	127.54	344.573	1275.12
Id2	594.71	-2.18098	0.298565	-7.30489	2.77493e-13	1.06932e-10	381.543	409.622	500.84	337.611	248.321	271.638	384.582	686.334	372.525	384.062	540.849	513.844	1284.36	1703.48	901.038
Fam84a	166.287	4.66964	0.640822	7.28695	3.1704e-13	1.18957e-10	325.434	386.456	213.932	214.416	372.012	190.345	65.8388	72.029	64.9859	39.9658	271.384	246.964	9.96404	3.23037	17.3485
Fads3	3239.57	-1.23581	0.170097	-7.2653	3.72222e-13	1.3517e-10	2293.34	2540.92	1995.36	2489.3	2114	2202.85	2691.03	2822.51	3139.46	4027.77	3602.79	2644.9	5528.05	5606.84	4894.45
Zbtb7c	99.2378	-6.36026	0.875733	-7.26278	3.79213e-13	1.3517e-10	19.345	38.0752	4.73912	4.00048	2.66535	6.32588	11.8902	89.7561	159.637	15.7116	28.5552	49.0966	543.91	224.448	290.411
Slc14a1	1500.85	7.81389	1.09699	7.12301	1.05598e-12	3.67224e-10	1346.33	2176.86	2908.66	1072.41	8115.36	1059.06	3574.07	769.328	241.679	148.108	385.475	669.968	7.95652	5.73228	31.7469
Lox	20331.9	-1.97566	0.278487	-7.09425	1.30053e-12	4.31233e-10	11521	12860.1	7832.57	14515	8214.49	8825.69	14793.2	20845.7	24463.5	22808.6	15929.8	18260.1	46229.8	41800.6	36078.8
Myom1	71.9484	-4.42406	0.623517	-7.09533	1.2904e-12	4.31233e-10	33.4876	19.4311	19.4718	15.3116	12.6294	9.14689	33.2173	28.4815	16.8898	34.9754	27.5262	31.6471	501.134	232.203	63.6739
Tln2	859.405	-2.35234	0.333448	-7.05459	1.73111e-12	5.60957e-10	279.582	323.088	395.069	297.88	453.266	253.974	1251.46	944.085	1601.39	829.496	358.978	771.311	1499.73	1602.13	2029.63
3110039M20Rik	75.8248	3.02481	0.435587	6.94421	3.80589e-12	1.20587e-09	114.259	98.9832	71.977	157.991	130.251	113.017	61.6586	47.3334	43.0189	47.764	137.13	64.7284	17.9353	17.2286	14.0957
Adamts1	3937.56	-2.38699	0.346156	-6.8957	5.36004e-12	1.62603e-09	1952.05	2754.45	1040	2030.04	1877.21	1701.42	2098.97	4276.6	4599.31	2674.37	2134.43	2587.48	11320.9	10527	7489.13
Jazf1	38.5467	-2.63024	0.381316	-6.89779	5.28177e-12	1.62603e-09	13.8878	26.2809	21.4139	14.6079	17.3355	14.4791	42.68	40.8562	43.5415	20.8197	11.1718	23.7236	111.245	99.3132	76.8443
Ndrg2	703.905	3.18895	0.463296	6.88317	5.85338e-12	1.70321e-09	1240.45	530.836	644.83	1400.1	1041.11	1127.39	683.454	1222.42	418.247	557.309	958.223	342.69	86.6366	134.637	170.233
Tro	819.227	1.96748	0.285749	6.88536	5.76417e-12	1.70321e-09	1049.81	1156.33	847.627	988.715	1016.16	1309.94	1291.05	1193.97	1006.67	440.133	781.66	358.895	317.534	218.306	311.597
Cacna1i	112.444	5.69898	0.832263	6.84756	7.5118e-12	2.14207e-09	131.06	50.1803	15.1578	175.824	246.953	586.925	63.4231	66.1234	47.5649	64.6789	199.913	19.4134	6.16051	3.88737	9.39461
Wsb2	4219.94	-1.00712	0.147851	-6.81171	9.64486e-12	2.6964e-09	3381.54	3557.62	3137.93	2899.28	3281.43	2813.97	4534.76	4404.86	4368.03	5104.83	3375.15	4361.55	6295.82	5960.56	5821.79
Plekhh1	45.9183	8.99383	1.32237	6.80132	1.03666e-11	2.84244e-09	32.6454	56.8627	21.993	109.089	95.58	91.207	91.9654	45.2754	49.4259	7.7982	44.1118	42.8203	0	0	0
Fam46b	395.281	-2.21394	0.326481	-6.78121	1.19174e-11	3.20601e-09	310.131	312.745	262.916	135.421	126.503	190.345	356.366	469.218	475.953	218.35	392.212	581.56	650.651	875.43	571.416
Il33	494.002	4.96717	0.734315	6.76437	1.33891e-11	3.53522e-09	744.408	2649.34	624.727	312.009	777.337	1009.63	170.218	191.491	101.166	174.861	533.434	53.7279	17.9721	13.2428	36.4657
AI854703	51.5516	2.88611	0.428304	6.73844	1.60092e-11	4.15016e-09	91.9564	86.3358	93.284	41.418	101.589	78.4049	56.9772	48.5488	53.8489	27.5946	35.1902	28.1904	11.4917	9.03185	9.41176
Eya4	407.379	-5.38628	0.808385	-6.66302	2.68265e-11	6.83022e-09	154.207	144.511	47.9918	46.7609	4.65936	40.4217	50.5785	850.355	198.43	230.713	145.908	356.512	1298.24	1256.08	1285.31
Adamts7	1129.82	2.84985	0.429117	6.6412	3.11147e-11	7.78305e-09	949.631	979.064	694.609	1390.79	3904.11	1335.02	1778.93	1068.13	1267.37	836.928	1202.01	621.798	259.282	214.504	445.051
Dyrk3	238.718	2.59816	0.393913	6.59576	4.2307e-11	1.02239e-08	318.905	275.451	276.229	474.212	306.399	371.312	397.63	226.344	195.894	144.878	170.405	232.544	43.5696	40.0721	106.93
Sertad4	972.751	-1.4512	0.219938	-6.59822	4.16114e-11	1.02239e-08	607.4	691.614	713.037	620.415	622.79	618.256	680.375	1025.88	1330.9	984.241	779.292	826.904	1491.5	1737.77	1860.89
Alcam	1499.02	3.298	0.500731	6.58636	4.50738e-11	1.0711e-08	2552.04	1159.2	1003.32	4190.42	4717.23	2801.58	1328.32	642.786	659.47	310.3	1032.29	897.972	596.226	225.352	368.74
Gm28049	678.523	-4.40846	0.674792	-6.53306	6.44389e-11	1.50618e-08	1317.47	1313.37	901.113	39.7728	35.5343	37.7516	26.7579	35.8297	43.1676	1582.36	1196.53	1248.26	49.9004	1260.46	1089.56
Bag4	1117.32	0.852577	0.130786	6.51885	7.08506e-11	1.62933e-08	1150.75	1181.48	996.682	1382.42	1712.94	1403.8	1065.96	1078.38	1131.3	1030.34	1143.07	990.842	822.033	768.828	901.038
Rps12l1	174.782	-22.2399	3.414	-6.51433	7.30169e-11	1.6525e-08	0	64.2338	1661.47	0	0	0	0	45.2754	47.5953	34.1171	446.872	169.29	0	0	152.884
Klra2	58.9547	3.06718	0.472131	6.49646	8.22339e-11	1.83202e-08	64.9795	67.0716	43.1028	93.9971	68.64	88.4994	74.7577	40.3331	105.207	81.0358	76.1156	50.743	8.78758	7.23804	13.8127
Etv1	725.992	2.74876	0.423872	6.48487	8.88088e-11	1.94805e-08	761.444	1022.87	513.862	673.708	2178.37	1315.85	566.317	599.359	759.569	787.185	713.282	378.245	163.412	169.065	287.355
Plxdc2	681.584	-3.59729	0.555619	-6.47439	9.5194e-11	2.05648e-08	105.316	83.2018	296.142	160.399	105.148	289.234	182.937	497.441	435.474	237.44	559.547	565.415	2097.51	3272.64	1335.92
Inhbb	229.346	-3.58464	0.554101	-6.46928	9.84689e-11	2.09548e-08	41.8269	129.521	142.954	49.8424	83.3982	33.7069	186.021	274.739	246.214	137.443	47.9477	62.7367	1044.23	307.962	651.653
Galnt10	1440.2	-1.44259	0.224007	-6.43995	1.19516e-10	2.50597e-08	956.912	1131.27	724.512	860.078	1118.36	945.749	1079.62	1756.08	1345.84	1169.65	1396.9	1169.7	2955.63	2746.09	2246.67
Atp9b	35.5656	-8.60793	1.3448	-6.40091	1.54456e-10	3.19164e-08	67.3311	17.9012	17.9943	0	0	0	24.0364	28.8116	17.3906	22.4198	66.1678	65.7242	96.6511	65.6842	43.3713
Dbp	60.7601	-2.24431	0.352839	-6.36073	2.00791e-10	4.03223e-08	29.5849	42.1205	25.9917	21.6297	48.727	26.7673	45.9827	34.9855	44.8494	45.8145	36.4402	47.7994	146.471	185.208	129.03
Mctp1	56.4939	4.92696	0.774542	6.36112	2.00285e-10	4.03223e-08	93.117	54.7129	118.266	114.948	171.949	70.0839	23.401	34.645	84.2261	14.8252	28.1752	25.0969	8.54223	3.48315	1.93655
Ctsl	20418.2	1.41407	0.222499	6.3554	2.07881e-10	4.11661e-08	27019.1	27662.6	30848.1	27321.1	28167	25137.5	21856.4	14364.6	16857.9	16442.5	22636.1	17703.7	7217.95	10455.6	12582
C3ar1	145.744	3.8821	0.613036	6.33258	2.4109e-10	4.6278e-08	254.022	108.46	239.923	154.229	333.593	152.673	164.075	188.304	154.685	77.0073	208.093	107.549	9.96404	3.23037	30.3599
Ephb3	757.42	-1.83281	0.289364	-6.33394	2.38974e-10	4.6278e-08	418.842	680.911	432.188	370.568	403.794	452.77	514.275	1100.92	904.206	434.017	651.622	626.3	1500.41	1557.67	1312.8
Gadd45g	1079.27	-1.99068	0.314428	-6.33109	2.43432e-10	4.6278e-08	909.296	637.586	995.519	514.069	406.025	408.3	940.43	1154.91	1393.73	932.563	1005.17	1611.49	1077.92	1826.32	2375.7
Adssl1	76.1783	3.09873	0.493508	6.27899	3.40773e-10	6.39308e-08	152.386	127.16	73.997	115.972	102.653	158.067	54.6153	59.981	48.7543	47.7518	84.3337	73.0602	12.0169	4.3288	27.5984
BC030500	48.7834	5.09609	0.814539	6.25642	3.93922e-10	7.29421e-08	77.8403	36.3205	94.9019	103.275	42.7486	48.043	40.0142	76.7177	46.7953	46.5688	58.0096	53.4477	0	5.44595	1.62253
Chic1	365.775	1.95217	0.316192	6.17401	6.65812e-10	1.21707e-07	419.289	440.159	448.857	555.789	761.829	588.88	260.22	175.957	270.012	472.766	313.578	286.796	199.281	89.3735	203.845
Gm5124	143.562	2.67456	0.433656	6.16748	6.93856e-10	1.25228e-07	228.743	216.351	196.921	265.42	299.663	121.904	209.355	64.3796	120.242	84.5052	114.644	123.714	38.7579	32.3336	36.4983
Lrrc75b	161.774	-6.72618	1.09133	-6.16326	7.12628e-10	1.27008e-07	5.10084	9.47711	3.99872	2.82127	15.93	0.991381	4.18024	172.87	36.6118	44.8397	19.1791	14.9373	578.91	1423.52	93.2482
Prss23	114.982	-2.74605	0.447324	-6.13884	8.31266e-10	1.46323e-07	60.1899	84.241	83.9732	59.2466	30.9229	27.7587	54.3432	48.3623	84.2071	81.8812	105.485	212.11	166.399	315.499	310.105
Dirc2	563.198	-1.09511	0.178537	-6.13378	8.58145e-10	1.49213e-07	465.596	480.615	527.124	378.572	407.768	392.06	509.575	566.248	567.216	494.625	534.164	606.957	860.082	1022.62	634.746
Tmem5	1174.64	-0.709233	0.115935	-6.11749	9.50607e-10	1.63298e-07	993.658	1031.19	1161.42	964.178	921.424	921.146	1077.96	1199.43	1159.53	1280.55	1102.06	1217.2	1399.16	1502.67	1688.04
Adamts20	84.6014	-6.29596	1.03503	-6.08287	1.18052e-09	2.0038e-07	22.1877	30.5784	21.8956	8.37588	0	4.55286	53.516	36.6511	24.53	71.266	2.08563	11.4331	542.424	362.268	77.2574
Boc	464.628	-3.50112	0.57645	-6.07359	1.25082e-09	2.0499e-07	73.4521	318.01	276.912	138.242	139.622	63.4484	157.804	626.653	557.415	250.517	157.268	344.554	1534.46	1579.65	751.407
Efnb1	855.554	-2.32426	0.382523	-6.07614	1.23107e-09	2.0499e-07	434.371	518.411	375.416	391.829	482.106	406.383	431.065	789.539	637.351	505.835	548.662	901.01	1727.95	3548.44	1134.94
Mras	978.315	-1.17879	0.194046	-6.07477	1.24167e-09	2.0499e-07	712.767	840.687	722.711	610.761	693.681	569.868	867.71	1478.73	1110.36	932.581	1051.42	838.939	1379.31	1503.24	1361.96
Pcdh20	188.167	3.17089	0.523407	6.05818	1.3767e-09	2.23056e-07	230.598	354.995	194.933	203.449	323.15	264.486	134.841	220.618	161.361	126.624	113.497	405.751	46.2263	14.6247	27.3492
Etv5	2567.65	1.41084	0.233322	6.04674	1.47805e-09	2.36786e-07	3573.1	3609.67	2172.66	3089.36	3745.55	3152.2	2697.17	2689.15	2479.91	1960.82	3314.6	2274.57	1292.05	1328.77	1135.23
Col1a1	76637.2	-2.54591	0.421941	-6.0338	1.60149e-09	2.53711e-07	38126.8	45503.2	22865.8	29917.3	34887.3	35621.8	26998.9	116288	63328.5	54883.5	44693.1	49976.1	238924	224645	122898
Areg	179.304	4.07282	0.676273	6.02245	1.71797e-09	2.67447e-07	331.555	306.427	355.886	331.028	161.174	515.518	124.362	29.8406	64.9859	77.0073	178.365	153.356	6.97482	7.53753	45.5398
Kcnh1	67.2933	7.48285	1.24264	6.02172	1.72571e-09	2.67447e-07	128.056	114.085	65.2301	106.518	263.444	68.3501	52.7517	30.4041	49.8356	21.4007	95.6298	11.034	0	1.32569	1.33491
Ablim1	486.597	-4.0509	0.673775	-6.01225	1.82967e-09	2.80511e-07	159.849	133.069	23.6849	123.051	97.5169	48.5144	180.153	1028.19	273.061	162.857	399.277	199.065	1936.24	1309.93	1224.5
Bcl6b	98.1947	4.97508	0.832055	5.97927	2.24137e-09	3.39972e-07	167.956	123.57	70.5539	131.671	209.573	233.673	75.6392	29.9602	124.381	63.8078	172.217	49.4122	0	17.7408	2.76625
Wdr11	1229.99	-0.620035	0.103966	-5.96383	2.46394e-09	3.69799e-07	1081.1	1189.61	1253.48	952.28	1039.65	957.703	1238.22	1279.6	1313.51	1209.11	1126.96	1274.62	1468.99	1640.53	1424.46
Slc25a23	508.403	1.62751	0.27324	5.95633	2.5797e-09	3.83139e-07	518.326	424.501	433.733	577.798	898.986	645.27	708.287	505.604	566.45	668.358	581.129	410.861	162.849	231.723	292.171
Mink1	1429.32	1.17023	0.196737	5.94818	2.71144e-09	3.98554e-07	1734.03	1480.24	1035.3	2142.5	2452.49	1935.57	1445.98	1103.64	1335.13	1394.73	1205.98	1272.27	1048.11	901.986	951.829
Cacnb2	354.894	2.72492	0.458886	5.93813	2.8829e-09	4.19432e-07	318.571	555.197	329.806	557.692	1010.05	478.995	273.251	219.823	511.309	178.679	327.711	251.179	54.1867	93.6095	163.361
Foxg1	3806.43	2.43234	0.410301	5.92819	3.063e-09	4.41134e-07	6418.36	5052.54	3591.58	6586.32	6465.61	6205.23	2666.37	1938.24	2780.07	2472.69	5898.13	3454.09	1890.32	520.766	1156.1
Lims2	101.149	-3.38284	0.571443	-5.91982	3.22302e-09	4.59539e-07	56.1092	33.6964	58.9812	32.9148	22.4894	6.93967	95.1006	95.6957	89.6989	125.746	75.7573	172.277	138.5	400.566	112.765
Svep1	3639.63	-4.2234	0.715159	-5.90553	3.51514e-09	4.96227e-07	307.437	732.726	128.581	364.923	702.894	956.742	587.125	6877.83	2431.2	1621	1261.24	804.671	18615.1	13387.5	5815.56
Atp6v0e2	453.397	3.21492	0.546395	5.88389	4.00742e-09	5.60175e-07	1052.81	567.574	687.78	121.314	767.451	250.819	467.142	426	766.102	367.49	630.032	573.593	28.8957	54.9163	39.0341
Sparc	36637.3	-1.80939	0.30835	-5.86797	4.4117e-09	6.10699e-07	23712.6	30847.3	24711.2	23096.8	15989.8	16702.2	34425.1	56471.2	43586	20179.2	36556.3	27746.2	79149.8	77230.3	39156.2
Rab11fip1	732.853	2.4348	0.415151	5.86486	4.49512e-09	6.13723e-07	829.952	1138.31	405.416	1357.76	1785.01	960.768	673.641	507.796	695.58	469.258	871.405	538.698	218.507	157.808	382.881
Spp1	45677.5	3.29274	0.561521	5.86396	4.51963e-09	6.13723e-07	94994	64631.6	39909.2	44414.9	59621.9	105630	62557.2	16939.4	23959.2	22042.7	95289.1	33778.4	6914.42	5527.04	8953.75
Aim2	31.7257	4.26685	0.729121	5.85205	4.85558e-09	6.53121e-07	23.0892	26.0773	21.7229	57.2207	43.1558	72.5921	101.235	44.3552	25.1417	15.0922	7.50765	29.2744	1.95021	4.64106	2.82962
Abca3	761.377	1.29088	0.220718	5.84856	4.95832e-09	6.60708e-07	877.4	896.847	592.075	853.284	1102.75	858.777	928.152	847.638	895.122	932.768	750.043	735.201	363.442	306.988	480.172
Tnfaip2	3887.49	1.82494	0.312387	5.84192	5.1602e-09	6.81241e-07	3527.61	6155.59	4060.53	5598.56	4164.98	7735.26	4738.68	2334.44	3452.46	3122.81	4119.71	4362.25	1907.22	1657.03	1375.21
Pappa	223.421	-4.11909	0.705536	-5.83825	5.27513e-09	6.90025e-07	63.2504	70.5518	13.9955	20.6893	33.7341	86.2501	32.3969	95.6957	294.725	50.6883	63.2909	83.649	877.831	630.999	933.566
Ptprq	161.764	-4.27834	0.73488	-5.82182	5.82105e-09	7.47716e-07	44.8874	87.4	21.993	31.0339	19.6782	22.8018	161.984	53.5073	148.278	144.267	20.138	243.976	770.22	423.178	233.121
Wisp2	1673.78	-7.16747	1.23101	-5.82244	5.79948e-09	7.47716e-07	133.643	180.09	212.127	44.188	14.0684	64.4763	160.501	4150.46	163.766	1303.96	335.202	707.579	8091.45	9271.27	273.91
Krt18	93.5904	6.58125	1.13369	5.80516	6.43041e-09	8.18614e-07	141.803	57.9157	241.923	36.6765	44.0417	327.156	13.5858	63.7971	23.7977	107.225	76.7162	264.888	0	1.07679	3.25284
Fam73a	477.094	1.59478	0.274835	5.80268	6.52617e-09	8.23452e-07	580.643	558.544	489.543	626.49	832.875	700.288	485.771	270.856	580.049	488.356	375.298	453.033	281.459	181.185	252.023
Myo5c	84.699	9.20647	1.59333	5.77813	7.5536e-09	9.4473e-07	430.511	216.921	21.993	31.9743	39.3565	271.638	27.1716	32.9276	18.3059	8.77298	35.4813	135.432	0	0	0
Slc24a3	551.854	-3.6648	0.634714	-5.77394	7.74395e-09	9.60115e-07	126.679	366.321	386.422	151.308	89.1463	57.5813	420.708	590.442	724.386	994.933	275.608	318.115	2079.68	1353.28	343.199
Errfi1	8739.8	2.0433	0.35399	5.77218	7.82503e-09	9.61804e-07	11394	11752.3	7691.03	14343.5	7998.53	11682	10481.1	5297.08	6127.43	16261.2	13044.2	6770.25	3294.28	2625.87	2334.22
Arap3	140.5	3.64496	0.632266	5.76492	8.1696e-09	9.95574e-07	334.615	107.407	170.945	351.718	149.929	216.121	233.049	114.217	191.297	23.3946	104.526	52.7785	10.9604	10.7679	35.7813
Sfrp2	6146.64	-4.28336	0.744227	-5.75546	8.64078e-09	1.04352e-06	584.577	973.332	298.609	1017.14	1243.59	1344.19	1969.96	8023.89	1297.06	1175.39	3385.78	689.203	36427.8	29227	4542.06
Sox7	147.656	4.99853	0.868687	5.75412	8.70945e-09	1.04352e-06	240.76	408.569	112.964	83.6975	643.759	121.94	135.858	53.5073	195.873	22.4198	115.074	53.7743	4.98202	3.23037	18.4328
Mmp10	162.097	4.55478	0.792816	5.74507	9.18835e-09	1.09173e-06	85.6941	184.277	152.951	246.391	652.193	133.836	256.04	84.3769	132.718	130.62	34.5223	293.767	2.98921	17.2286	23.8542
Serpinh1	7134.09	-1.55151	0.271055	-5.72397	1.04062e-08	1.22621e-06	3877.01	5145.32	2819.5	4595.87	4769.41	5160.88	5687.87	9150.7	5634.2	6274	5206.74	6110.66	15849.2	16734	9996.06
Col8a2	219.623	-7.98345	1.39712	-5.71424	1.10197e-08	1.28786e-06	22.3853	5.63534	21.9357	4.31383	6.4476	0.75793	1.59794	227.161	17.494	3.72618	12.4634	49.4861	657.767	2007.85	255.318
Mtss1l	1270.1	-2.07131	0.362708	-5.71067	1.12534e-08	1.2998e-06	723.469	762.794	485.083	690.619	822.607	611.253	703.44	1794.91	996.808	589.581	1092.13	850.577	3635.45	3358.81	1933.92
Rsbn1	1994.55	1.63155	0.285741	5.7099	1.13042e-08	1.2998e-06	2536.16	2482.1	1885.36	3319.8	2983.01	2232.56	2188.03	943.368	1418.56	2708.63	2225.09	2240.79	951.785	738.636	1064.44
Rspo3	280.598	-3.46389	0.607018	-5.7064	1.15391e-08	1.31619e-06	132.622	65.2868	115.963	59.2466	72.1535	89.2243	60.6135	402.334	100.682	331.424	179.324	166.302	1135.9	933.577	364.319
Pcdhb19	79.0297	-2.21271	0.388245	-5.69926	1.20329e-08	1.36163e-06	28.5647	25.2723	11.9962	27.2722	49.6641	31.7242	156.759	120.391	119.904	30.218	41.235	38.837	242.126	131.368	130.114
Akr1c18	238.567	5.95887	1.05083	5.67062	1.42284e-08	1.59739e-06	922.647	158.732	238.247	302.891	84.1471	474.975	625.724	176.544	28.2528	82.6813	179.376	290.522	10.2728	3.48664	0
Klhl1	99.8825	6.7357	1.18837	5.668	1.44478e-08	1.60934e-06	241.78	23.1663	14.9952	199.369	254.88	561.122	6.27037	11.3188	3.66118	3.8991	157.268	10.954	1.99281	4.30716	3.25284
Mmp14	10680.6	-1.36029	0.240874	-5.64729	1.62999e-08	1.78921e-06	6507.65	8961.13	7099.73	6912.1	8686.53	5544.79	8062.65	13175.1	12533.1	9421.21	8634.41	10386.4	18987.5	20985.6	14310.3
Net1	2938.61	1.41264	0.250151	5.64714	1.63134e-08	1.78921e-06	3114.26	3996.11	1876.95	3793.14	5550.57	4421.34	2437.62	2811.06	2136.68	3231.67	2846.42	2692.77	1601.58	1763.47	1805.52
Gspt2	187.542	1.73361	0.308043	5.62783	1.82492e-08	1.98624e-06	264.405	174.299	273.47	234.274	215.565	210.908	254.22	168.781	162.923	254.32	232.788	169.107	91.333	59.2391	47.4973
Slc9b2	24.2324	4.22558	0.751162	5.62539	1.85093e-08	1.99928e-06	61.2969	48.3614	24.2836	24.9217	94.3749	17.2361	18.3505	5.70248	18.6447	11.5684	18.44	13.128	2.93534	2.46723	1.77457
Rtn4r	36.8295	-3.1332	0.560348	-5.59153	2.25083e-08	2.41295e-06	20.4034	27.3783	9.99681	9.40422	5.62235	13.8793	33.442	49.3913	36.6118	25.3442	14.3843	53.7743	89.6763	85.0664	78.0683
Aim1	343.243	-3.93992	0.70628	-5.57841	2.42727e-08	2.51637e-06	92.8353	111.619	94.9697	87.4592	51.5382	65.4311	104.506	606.073	88.7836	215.425	116.033	376.42	727.375	2051.28	358.897
Fam169a	71.0836	2.08209	0.373038	5.58144	2.38538e-08	2.51637e-06	84.2633	79.482	112.807	160.562	109.29	105.61	49.1631	23.2251	61.977	49.0579	70.0515	72.1035	26.0182	31.6055	31.0394
Foxf1	37.3656	-4.59415	0.823449	-5.57916	2.41686e-08	2.51637e-06	7.14118	3.15904	2.99904	6.58295	4.68529	7.93105	20.9012	17.4928	12.8141	1.94955	9.58953	1.99164	80.7087	342.419	40.1184
Gm10184	1259.17	-26.3042	4.7117	-5.58274	2.36764e-08	2.51637e-06	4242.88	2242.92	35.9885	0	0	0	3005.6	0	3300.55	0	3062.9	0	0	2996.71	0
Rasa4	359.982	-2.25611	0.404552	-5.57682	2.44957e-08	2.51637e-06	269.118	311.147	132.059	156.516	262.921	110.813	199.483	216.66	134.133	228.665	535.579	307.544	872.707	836.078	826.313
Ttc17	942.099	-0.778012	0.139515	-5.57656	2.45319e-08	2.51637e-06	717.26	780.979	612.712	795.681	842.77	831.741	749.695	942.793	972.637	801.178	937.299	910.721	1350.81	1456.19	1429.01
Btn1a1	33.5434	7.94656	1.42723	5.5678	2.57977e-08	2.60198e-06	112.939	18.8518	23.2252	156.974	29.6077	85.5927	2.91354	1.91248	2.55176	11.7762	31.1906	24.6085	0	0	1.00763
Papss2	259.338	-2.31909	0.416435	-5.56891	2.56344e-08	2.60198e-06	167.308	189.542	118.962	112.851	121.818	77.3277	108.686	404.392	246.214	277.811	181.242	326.629	633.713	501.784	421.786
Parvb	1396.04	3.55746	0.639025	5.56702	2.59139e-08	2.60198e-06	1652.69	1902.57	815.798	4041.57	2483.73	2559.27	1198.9	296.281	179.743	2425.28	1432.54	1182.15	105.43	184.202	480.366
Sestd1	2530.35	0.980754	0.176467	5.55771	2.7334e-08	2.72538e-06	2430.99	2787.43	2085.02	3470.37	3173.67	3838.18	2622.3	2164.76	2644.09	2579.4	2810.53	2037.27	1604.21	1664.96	2042.05
Lamb2	5166.32	-1.56105	0.281166	-5.55205	2.82345e-08	2.79561e-06	4251.35	3615.01	3942.12	3388.96	3362.73	3184.68	5040.22	4593.48	3683.74	4289.36	4490.3	4335.15	11728.1	12700.7	4888.88
Tshz3	402.822	-2.15807	0.388994	-5.54784	2.89227e-08	2.844e-06	165.212	302.637	210.478	76.5792	249.234	172.342	328.081	445.316	575.672	568.122	359.936	377.419	627.498	745.163	838.641
Ppap2a	2485.13	-1.65213	0.298562	-5.53363	3.13677e-08	3.06329e-06	1992.83	1465.02	2579.97	1731.38	1719.49	1317.91	1595.92	2198.68	1111.32	2300.3	2271.63	2004.29	5830.14	5858.72	3299.35
Stk40	991.865	-1.1762	0.213633	-5.50569	3.67718e-08	3.56662e-06	606.241	869.942	638.074	729.817	801.354	708.198	890.138	1030.93	1067.23	835.227	687.989	952.199	1864.75	1946.87	1249.03
Procr	449.531	2.03269	0.369734	5.4977	3.84775e-08	3.68196e-06	573.891	494.444	797.977	653.586	699.063	415.058	476.837	335.269	278.549	261.517	660.149	664.539	159.37	153.52	119.195
Syt14	51.5395	6.5907	1.19857	5.49882	3.82352e-08	3.68196e-06	96.4636	28.4694	10.8283	201.022	40.5876	251.627	7.47912	59.9605	21.1252	13.1771	20.7571	15.7316	1.90589	0	3.95725
Zfp362	284.097	-1.84866	0.336608	-5.49202	3.97365e-08	3.77709e-06	177.002	166.129	232.725	110.943	164.131	217.64	186.425	272.934	263.163	255.163	218.666	226	752.029	690.644	327.867
Palm2	72.1279	-5.15861	0.940217	-5.48662	4.09699e-08	3.86854e-06	19.1748	28.7973	5.23137	13.6709	4.68379	1.51353	7.99421	113.689	70.1984	111.504	26.959	29.5869	315.8	231.156	101.957
1190002N15Rik	797.238	-1.92242	0.351048	-5.47624	4.34463e-08	4.07538e-06	369.301	452.795	520.834	424.13	438.543	440.173	498.494	1223.46	768.848	687.217	631.95	564.631	2196.07	1874.69	867.425
Slitrk6	42.2807	7.71508	1.40978	5.47253	4.43647e-08	4.13432e-06	131.602	46.3325	66.9786	39.4977	89.0206	109.052	18.8111	34.9855	1.83059	19.4955	27.8096	47.7994	0.996404	0	0
Bcl2l11	954.751	1.7297	0.317794	5.44285	5.24358e-08	4.81926e-06	1114.89	1064.94	744.001	1153.7	1658.08	1744.28	811.124	659.297	735.714	1237.76	1475.68	547.903	417.74	496.124	460.029
Col5a2	25558.6	-1.61689	0.29712	-5.44185	5.27286e-08	4.81926e-06	13081	18829	11002.2	15941.7	10386.6	16903.4	21733.1	32891.6	36649.4	30612.6	17793.3	24958.2	46171.5	51192.4	35232.8
E2f4	3378.26	0.666079	0.122381	5.44265	5.24951e-08	4.81926e-06	3658.32	3529.7	3841.77	3865.13	4172.72	4399.75	3705.79	3488.26	2777	2953.57	3142.49	3301.15	2617.55	2514.3	2706.37
Ncald	83.6717	-3.15418	0.580541	-5.43318	5.53582e-08	5.02737e-06	35.87	22.8202	22.812	45.0241	31.3434	10.5658	20.9338	52.9107	81.164	89.3755	45.2175	31.6648	213.967	221.634	329.774
9330182L06Rik	41.4226	6.68336	1.23079	5.43014	5.63109e-08	5.06705e-06	93.6193	22.6291	8.26896	145.91	41.2565	121.323	54.3936	19.8115	37.1064	11.8121	54.4855	7.75638	0	1.79014	1.17512
Gcat	1052.98	0.930786	0.171431	5.42952	5.65059e-08	5.06705e-06	1325.25	1283	1347.07	1255.08	1273.88	1274.85	1223.58	1294.15	819.187	828.566	887.487	986.872	597.97	709.766	688.005
Mid2	348.886	-2.82468	0.520377	-5.42814	5.6943e-08	5.07433e-06	109.268	191.203	187.626	95.0322	177.471	125.297	105.485	106.443	368.665	506.278	146.022	294.945	1107.18	961.634	750.747
Bicc1	2214.74	-3.86288	0.711903	-5.42613	5.75879e-08	5.09993e-06	318.49	1195.22	381.838	178.999	647.211	360.799	827.323	4947.13	1558.44	3206.52	769.118	1559.05	7844.5	7025.83	2400.58
Ankrd6	215.937	2.69296	0.496718	5.42151	5.90992e-08	5.20146e-06	197.662	312.447	277.15	386.675	697.737	249.941	182.574	160.247	174.411	220.276	87.3916	84.6948	86.4703	29.4529	91.933
Kank3	73.5237	2.11557	0.393314	5.37882	7.49759e-08	6.52693e-06	113.286	81.9965	83.2128	105.666	147.76	90.3125	69.6415	68.6581	60.7455	39.966	107.93	54.3121	20.3143	33.9682	25.0877
Prss22	171.211	4.78173	0.889031	5.37858	7.50748e-08	6.52693e-06	613.121	86.347	105.966	243.569	130.251	293.449	244.544	122.449	39.3577	85.7803	505.368	73.6908	6.97482	6.46074	10.8428
Aif1l	2058.22	2.03743	0.379827	5.36409	8.13564e-08	7.03018e-06	2341.78	1839.57	2074.09	3219.65	1933.21	2320.13	4034.09	1753.75	2404.09	1574.04	3693.59	1864.93	562.346	439.782	818.225
Ednrb	40.9583	-6.39692	1.19782	-5.34049	9.26967e-08	7.96187e-06	34.7059	33.716	7.00184	0	0	2.97588	35.5528	17.503	8.24245	115.091	25.9068	88.9996	151.542	23.7032	69.4345
2900011O08Rik	61.8647	4.59799	0.861441	5.33756	9.4205e-08	8.04296e-06	199.185	60.2621	34.7939	90.4123	112.963	93.1265	79.9555	52.089	16.8638	47.7747	56.8007	71.2729	0	10.6301	1.8409
Ost4	2072.89	-0.757181	0.141995	-5.33244	9.69024e-08	8.22402e-06	1695.45	1817.97	2317.79	1481.39	1583.89	1516.75	2457.59	2594.86	2228.42	2039.6	1710.58	1904.1	2359.64	2728.65	2656.74
Dkk2	3938.54	2.77432	0.520636	5.3287	9.8918e-08	8.3454e-06	5405.87	6255.95	6020.08	6784.2	8415.72	4057.72	3804.02	2514.84	3973.29	2479.83	1883.38	4668.41	886.799	1688.41	239.626
Rragd	220.603	3.04191	0.570983	5.3275	9.95751e-08	8.35142e-06	177.717	314.392	508.134	554.108	300.549	328.853	314.842	47.4319	182.894	145.543	102.196	189.796	60.2446	35.6758	46.6654
Col5a1	18267.3	-1.6459	0.309446	-5.31887	1.04416e-07	8.70618e-06	11937.7	15485.4	8862.9	9508.75	10720.9	13491.1	10125.2	24660	17820.2	16422.9	13123.8	16325.8	39170.6	39125.6	27229.2
Cst6	82.8023	2.66179	0.501656	5.306	1.12055e-07	9.28882e-06	130.581	52.6506	121.961	110.029	212.712	83.276	102.416	52.4783	79.6306	58.4865	94.9363	78.6699	20.9245	12.9215	30.3599
Svip	114	2.74429	0.517677	5.30116	1.15069e-07	9.48357e-06	270.345	104.248	183.941	76.1742	306.418	186.38	80.4697	59.6812	85.1224	54.5874	112.198	105.557	31.8849	20.459	32.5284
Ptgs1	1657.95	3.2816	0.620026	5.29267	1.20541e-07	9.87747e-06	2269.15	2000.68	2327.19	2417.93	5703.02	1261.12	1549.66	846.884	1975.14	296.955	2445.88	810.61	292.082	243.236	429.672
Aldh9a1	1342.72	0.5792	0.109492	5.28987	1.22402e-07	9.97265e-06	1482.33	1534.64	1395.15	1689.55	1529.77	1584.42	1373.99	1428.11	1366.11	1245.44	1272.15	1023.75	1132.62	1047.75	1034.98
Setbp1	1135.03	-2.79761	0.528986	-5.28862	1.23245e-07	9.98421e-06	246.881	634.966	286.908	249.212	432.921	532.372	492.224	1228.61	1435.18	1877.42	542.767	622.388	3668.76	2382.94	2391.93
Gas6	616.989	-4.53775	0.859842	-5.27743	1.3101e-07	1.05533e-05	47.9479	50.5446	31.9898	232.284	21.5523	67.4139	35.5321	285.029	594.026	25.3442	148.638	251.943	1916.08	2278.49	3268.02
Afap1	1658.01	-1.52144	0.288597	-5.27184	1.35063e-07	1.08187e-05	899.745	1484.8	901.604	1082.87	1330.09	743.504	1441.51	2038.64	2189.47	1337.96	1051.07	1306.88	3620.03	3201.54	2240.5
Ptprd	278.767	-2.81598	0.537412	-5.23989	1.6067e-07	1.27269e-05	76.1852	127.806	127.886	220.337	66.7588	59.8476	123.464	48.2109	149.192	392.042	187.15	160.744	759.989	1016.76	665.137
Tac1	64.4266	5.51911	1.0531	5.2408	1.59884e-07	1.27269e-05	141.306	77.8734	108.274	29.4631	230.58	37.5234	122.797	58.439	70.345	5.163	49.2345	28.4911	0	3.47122	3.43847
Apba1	61.9164	-4.89109	0.933764	-5.23804	1.62294e-07	1.27844e-05	8.16134	12.6361	5.99808	6.58295	7.49647	3.96552	5.2253	97.7537	59.4942	149.141	20.138	15.9331	171.381	236.894	127.945
Gna12	2961.52	-0.817426	0.156096	-5.23669	1.63479e-07	1.28071e-05	2189.28	2644.11	2200.3	2174.26	2419.49	2309.92	2790.31	2936.73	3565.07	3168.02	2849.05	3009.37	3311.05	4600.05	4255.81
Nefl	42.051	7.57186	1.45017	5.22136	1.77614e-07	1.38383e-05	114.259	57.9157	35.9885	30.0935	162.111	22.8018	88.8302	66.8841	15.56	5.84865	12.4664	16.929	0	1.07679	0
Ski	5465.91	-1.33833	0.256469	-5.21829	1.80587e-07	1.39758e-05	3397.55	5188.31	3565.06	3719.4	4522.17	3112.35	3833.9	5589.59	6955.78	4794.98	3846.75	4753.01	11205.7	9662.06	7842.05
Tspyl4	221.203	-2.06663	0.396094	-5.21752	1.81339e-07	1.39758e-05	111.198	149.528	111.964	110.029	182.726	64.4398	119.137	291.203	324.93	113.074	111.239	131.448	555.993	469.48	471.662
Ccdc141	209.227	-2.42722	0.466192	-5.20647	1.92462e-07	1.47534e-05	197.189	188.72	105.837	128.962	86.1218	64.8227	109.198	102.087	194.218	195.781	80.8502	185.414	751.028	482.328	265.855
Fhl1	11702	-2.63215	0.505755	-5.20441	1.94615e-07	1.47597e-05	8153.96	11143.3	17920.6	3868.48	2502.24	3342.06	10556.6	7414.05	3500.09	16812.2	7343.59	22757.6	20273.2	31008.3	8933.27
Stx7	1484.08	-0.742353	0.142631	-5.20471	1.94303e-07	1.47597e-05	1369.07	1479.48	1532.51	1255.46	1174.13	1024.1	1257.21	1307.84	1459.9	1840.38	1382.81	1400.12	1944.98	1975.91	1857.37
Numbl	1334.95	-0.790584	0.151968	-5.2023	1.96832e-07	1.48488e-05	1212.33	1210.13	1318	887.164	1215.82	1008.3	1241.37	1359.53	1222.83	1337.24	1304.53	1325.63	1954.21	1951.73	1475.4
Dusp9	670.09	2.36528	0.454917	5.19936	1.99971e-07	1.49571e-05	1160.95	591.793	902.712	1354.21	1825.39	645.389	743.038	386.899	632.469	175.46	433.447	457.082	196.291	191.669	354.56
Gm10052	153.052	-24.4972	4.71191	-5.199	2.00365e-07	1.49571e-05	0	863.47	0	0	0	0	0	0	266.351	351.894	0	0	814.062	0	0
Gstm4	155.633	1.79981	0.34652	5.19395	2.05882e-07	1.52889e-05	215.663	194.784	187.633	162.934	184.673	209.336	211.406	83.691	205.352	186.687	165.495	166.141	36.325	56.1404	68.2288
F2rl1	811.953	2.57619	0.497085	5.1826	2.18812e-07	1.60816e-05	727.38	1335.22	967.691	948.886	1542.4	999.312	949.96	304.58	1267.68	488.363	954.158	1108.35	203.266	100.141	281.913
Nid2	1874.59	-3.62471	0.699337	-5.18306	2.1827e-07	1.60816e-05	486.62	358.024	77.9751	519.113	334.53	462.975	697.056	4742.6	572.059	950.406	1499.8	1177.06	6301.26	7049.74	2889.61
Rnf34	762.432	-0.576216	0.111258	-5.1791	2.2296e-07	1.63024e-05	643.726	692.882	692.779	600.93	625.955	608.708	868.446	864.348	875.937	695.99	767.162	762.799	901.745	1024.03	811.043
Igsf11	88.8658	6.91409	1.33755	5.1692	2.35095e-07	1.70152e-05	46.0715	184.927	186.113	167.311	253.955	9.13703	10.595	60.2357	39.6892	74.5671	15.9087	280.845	1.64565	1.98484	0
Nmt2	5128.63	1.48984	0.288189	5.16967	2.34506e-07	1.70152e-05	5553.05	6225.81	4325.93	6291.48	9776.29	9112.01	3706.41	2911.74	5168.02	4091.62	5899.92	4901.79	3066.51	2061.22	3837.63
4930402H24Rik	3986.6	1.78985	0.346746	5.16186	2.44509e-07	1.76071e-05	3561.43	6760.84	3623.46	5601.28	6597.03	5727.89	5491.14	2477.79	5552.19	3387.58	2769.16	3064.53	1502.09	1262.17	2420.41
F5	46.1185	8.57881	1.66726	5.14546	2.66867e-07	1.91206e-05	103.037	38.9615	16.9946	142.004	6.55941	73.3622	13.5858	98.7827	1.83059	95.528	37.3992	63.7325	0	0	0
Selm	721.781	-1.91716	0.372747	-5.14333	2.69909e-07	1.92418e-05	411.291	445.571	1039.85	272.637	440.241	222.965	674.81	970.884	999.51	733.873	507.249	572.643	951.618	1451.64	1131.93
Ankrd13a	3627.04	-0.836307	0.162841	-5.13572	2.81066e-07	1.97637e-05	2448.98	3096.73	2931.58	3100.23	3221.16	2566.74	3669.45	3558.87	4407.9	3327.14	2701.11	3505.83	4746.45	5329.47	5793.93
Ddr1	2083.15	-1.95197	0.380158	-5.13463	2.82702e-07	1.97637e-05	1113.06	1425.44	937.431	722.554	896.6	1677.89	1356.64	2659.91	1686.92	2617.69	1761.06	1637.93	5561.79	4613.53	2578.81
Gadd45b	1068.41	-1.63386	0.318053	-5.13706	2.79067e-07	1.97637e-05	866.123	673.928	840.732	884.937	343.9	499.656	1038.79	966.218	877.768	1243.81	857.304	1568.42	1555.39	1690.56	2118.69
Mical1	1119.88	-1.54949	0.301775	-5.13458	2.82775e-07	1.97637e-05	639.348	947.375	967.034	409.361	795.987	652.13	1122.93	1358.23	955.181	1466.94	813.694	1230.07	1853.74	2170.1	1416.11
Sncaip	31.4816	-7.80863	1.52327	-5.12622	2.95625e-07	2.05611e-05	0	0.924805	1.96867	1.49018	0	0	6.17412	71.8071	10.7398	3.08924	0	4.48458	97.5899	239.569	34.3868
Zc2hc1a	813.751	-0.961894	0.187887	-5.11953	3.063e-07	2.12001e-05	669.953	799.018	538.842	613.945	546.891	577.321	783.557	815.965	731.112	1102.78	918.447	721.701	1226.92	1064.45	1095.37
B3gnt3	63.0632	2.871	0.561869	5.10974	3.22597e-07	2.22202e-05	81.6134	142.157	114.963	116.612	171.482	50.5604	50.1629	31.8986	71.393	12.6721	17.2612	38.837	13.9496	20.459	11.9271
Fat4	2762.35	-3.46207	0.678793	-5.10034	3.39044e-07	2.32408e-05	672.77	1498.5	432.492	809.97	769.728	847.006	600.383	3360.44	686.902	2609.7	1294.58	1110.08	11446.7	13028.7	2267.24
Pag1	257.462	-3.78538	0.742688	-5.09687	3.45323e-07	2.3558e-05	55.0797	59.9982	44.2993	31.8414	31.3687	106.144	46.8603	189.266	115.826	497.293	141.394	209.51	887.79	1329.39	115.865
Cxcl3	240.534	-7.09042	1.39439	-5.08498	3.67666e-07	2.49628e-05	17.3429	10.5301	41.9866	6.58295	3.74823	14.8707	15.6759	17.4928	21.0518	6.82343	16.3022	4.97911	3391.76	23.6894	15.1799
Leo1	1601.61	0.755627	0.148707	5.08132	3.74815e-07	2.53276e-05	1633.29	1521.6	1851.41	2003.1	1825.39	1984.74	1786.01	1446.75	1539.53	1613.25	1744.34	1631.15	1052.2	1015.41	1375.95
Amotl2	7118.11	-1.3692	0.269724	-5.0763	3.8486e-07	2.57621e-05	4943.91	5079.01	3831.6	5632.17	2993.47	4310.38	6577.79	8824.27	9233.19	7841.84	6608.43	7478.09	7529.73	12335.4	13552.3
Sgcb	401.806	-1.74932	0.344601	-5.07635	3.84761e-07	2.57621e-05	257.082	271.677	242.922	245.45	224.894	227.026	276.941	554.624	355.134	463.993	249.328	313.684	969.501	941.114	433.713
Pde5a	199.134	-3.06563	0.604266	-5.07332	3.90936e-07	2.60464e-05	55.0891	82.135	66.9786	54.5445	83.3982	75.3449	74.1993	251.073	104.344	156.939	97.8132	99.5821	687.518	980.955	117.102
Sema3e	933.534	-3.88705	0.766308	-5.07243	3.9276e-07	2.60464e-05	158.65	650.239	1050.44	102.819	132.975	263.588	673.924	394.594	1589.33	297.908	88.768	1213.12	2355.14	2631.28	2400.25
Gldc	93.1366	3.10468	0.613025	5.06452	4.09428e-07	2.7026e-05	146.904	104.248	80.9741	101.566	94.6429	205.216	81.5148	127.594	82.3765	57.5118	210.97	56.7618	9.96404	8.61432	28.1913
Smad9	217.911	-2.4191	0.478403	-5.05661	4.26772e-07	2.80411e-05	105.077	143.21	72.9767	136.361	59.0347	77.3277	62.7037	210.942	206.857	277.811	198.503	258.913	365.68	735.447	357.813
Col12a1	27901.8	-2.54966	0.504567	-5.05317	4.34543e-07	2.84207e-05	10867.8	22304.1	13872.1	6066.61	16337.6	7465.27	12352.4	22715	56058.6	28062.9	16044.7	31490.8	47953.5	72029.6	54905.4
Wbp2	2148.51	0.801391	0.158874	5.04418	4.55462e-07	2.96528e-05	2908.53	2142.82	2435.07	2665.33	2312.3	2943.21	2149.57	1951.53	2023.79	1889.58	2233.54	2027.13	1330.67	1731.5	1483.1
Trip6	2862.75	-0.862034	0.171026	-5.04038	4.6462e-07	3.01116e-05	2265.79	2347.16	2854.09	2082.09	1944.4	2497.29	2858.24	3325.68	2609.51	2795.66	2380.12	3123.89	3597.02	4492.37	3767.88
Stom	3465.05	1.18728	0.235689	5.03747	4.71721e-07	3.04335e-05	3176.8	4161.5	3505.88	4476.41	3340.61	4725.91	4177.11	3040.65	2552.76	4802.72	4211.72	4295.97	1971.88	2183.73	1352.1
Ctsh	324.769	2.51917	0.500271	5.03561	4.76336e-07	3.05928e-05	449.281	376.984	445.631	661.791	219.899	590.744	389.535	497.547	94.6028	350.493	241.864	296.277	83.9268	93.3803	79.5759
Timp3	10695.4	-2.43774	0.484948	-5.02681	4.98704e-07	3.17434e-05	5297.55	7422.4	2220.27	4022.04	6938.28	3427.19	5266.81	14786.5	11074.1	7961.59	5717.92	8344.49	26645.7	38127.9	13177.5
Zdhhc12	559.907	1.19519	0.237729	5.02753	4.96831e-07	3.17434e-05	714.18	691.304	642.931	700.573	645.18	775.335	578.606	578.12	458.291	430.712	718.673	537.656	238.137	281.44	407.464
Has3	96.789	3.19434	0.637111	5.01379	5.33691e-07	3.38194e-05	66.099	147.981	80.9645	112.904	566.765	81.237	43.8136	69.4668	33.3708	40.8669	56.6505	68.5998	27.5351	29.7539	25.8283
Cp	709.051	3.03964	0.606629	5.0107	5.42316e-07	3.42139e-05	759.66	292.506	146.585	1514.3	485.167	1597.86	732.717	1142.3	386.678	791.719	1638.93	709.631	177.142	81.7862	178.772
Emilin1	3204.39	-2.35851	0.470844	-5.00911	5.46811e-07	3.42485e-05	1485.36	1712.2	1009.68	1009.07	1825.39	1271.94	1885.29	7082.51	2433.77	3498.47	1821.05	1971.73	7703.2	9182.86	4173.4
Sdc3	2980.92	-1.02494	0.204628	-5.00881	5.47669e-07	3.42485e-05	2380.89	2009.24	1688.59	2033.01	1962.12	1575.2	3418.83	3678.25	4890.89	3087.56	3784.38	2869.02	3178.36	4210.84	3946.67
Ncor2	4924.04	-0.725451	0.145152	-4.99786	5.79711e-07	3.6094e-05	4217.72	3878.19	3740.94	3730.69	4176.24	4386.75	4409.36	4619.31	6137.91	5072.42	4719.46	4445.94	6469.93	6512.18	7343.52
Cacna1g	748.268	-2.71245	0.542978	-4.99552	5.8679e-07	3.63759e-05	317.291	772.131	246.907	110.23	300.182	258.686	319.214	1771.13	1023.39	633.87	638.457	441.942	1477.74	1372.83	1540.02
Foxp2	125.186	-3.72297	0.745992	-4.99063	6.01828e-07	3.71466e-05	30.8891	28.9802	34.7779	58.3294	31.2749	11.1369	35.268	77.9128	90.3431	84.3278	39.3161	50.3436	612.422	643.615	48.8579
Glce	1285.77	-1.23412	0.247456	-4.98723	6.12519e-07	3.76435e-05	1003.93	825.845	790.752	1172.7	1025.63	690.161	1190.7	1029.9	1443.93	1344.67	1121.81	851.404	2621.81	1847.13	2326.16
Kdr	271.951	-3.35967	0.674274	-4.98265	6.27209e-07	3.83809e-05	62.9667	120.553	43.7886	86.6298	27.0528	140.66	170.751	165.948	140.295	201.355	59.1884	250.812	1683.02	636.965	289.284
Ttc28	1446.41	-2.28622	0.459096	-4.97984	6.36382e-07	3.87758e-05	668.978	1019.12	437.574	509.372	947.247	560.576	625.515	1645.09	2278.58	1616.36	700.061	845.922	3802.78	2892.18	3146.75
Rabggta	644.418	0.87456	0.175663	4.97862	6.40406e-07	3.8855e-05	822.169	695.845	866.929	861.644	804.847	637.449	703.965	579.372	534.986	602.694	629.283	669.96	390.844	481.746	384.537
Lrrk1	2542.03	-1.08784	0.218569	-4.97712	6.4536e-07	3.89418e-05	1916.28	1830.91	2255.21	1878.78	1700.85	1774.26	2684.72	2343.45	3142.82	2050	2164.02	3006.96	2763.73	4646.45	3972.06
Nkain1	589.811	0.970316	0.194981	4.97646	6.47586e-07	3.89418e-05	697.537	570.544	709.653	721.014	582.424	736.546	761.472	503.303	682.851	667.071	655.442	518.051	320.79	359.416	361.044
Sema6b	69.5975	2.51213	0.504878	4.97573	6.50032e-07	3.89418e-05	94.5835	88.3032	113.301	111.532	66.4914	98.577	157.928	44.5923	49.836	53.0746	64.9999	52.3574	13.2862	22.0067	13.0945
Shmt1	1962.26	0.985466	0.198124	4.974	6.55868e-07	3.9127e-05	2169.22	1886.73	2378.44	2512.29	2129.6	2708.4	2430.84	1706.28	2039.21	1750.53	2398.38	1611.01	1096.95	1315.94	1300.13
Itga11	401.553	-4.17111	0.839307	-4.9697	6.7056e-07	3.96716e-05	115.659	148.449	19.7106	24.1049	150.229	74.2785	19.5751	46.5636	215.659	124.304	380.988	225.797	825.147	1036.07	2616.75
Lfng	137.047	-2.97917	0.599401	-4.97024	6.68695e-07	3.96716e-05	93.8554	35.8024	25.9917	58.3062	27.1747	49.569	107.641	220.203	56.7483	108.2	92.0595	115.515	429.45	496.4	138.788
Slc9a9	23.6564	-6.66324	1.341	-4.96887	6.73437e-07	3.96771e-05	4.41377	5.13561	5.19015	0.813749	0.810838	0	7.23435	125.544	17.4241	6.1342	6.03462	3.44674	50.2354	71.7635	50.6645
Aoc3	59.3743	-3.32367	0.671142	-4.95225	7.336e-07	4.28675e-05	8.78828	16.1266	9.56865	24.3039	19.3674	16.5237	40.0121	55.1553	17.5219	14.9284	33.0437	30.5015	338.574	224.686	41.5137
Nptx1	400.88	5.4554	1.10154	4.95253	7.32537e-07	4.28675e-05	782.469	283.26	113.964	659.236	3108.22	75.3449	100.326	495.971	134.548	24.3694	62.3319	85.6406	50.8166	24.7662	11.9271
Atf5	2700.14	-1.39071	0.281406	-4.94201	7.7321e-07	4.46419e-05	2307.11	2658.02	2565.65	1651.56	2084.12	1788.18	2158.5	1193	2830.28	1834.55	2178.36	2768.92	5614.74	5010.75	3858.37
Ccdc102a	1694.09	-0.965756	0.195419	-4.94197	7.73358e-07	4.46419e-05	1557.8	1289.47	1411.38	1062.91	1259.71	1401.87	1451.55	2287.32	1484.02	1525.59	1823.45	1582.78	2515.49	2220.72	2537.31
Chd7	276.659	3.80475	0.769776	4.94267	7.70585e-07	4.46419e-05	310.449	309.098	214.211	555.259	686	762.182	249.65	58.4904	418.036	56.5019	268.837	119.933	18.2056	11.2712	111.762
Creld1	580.183	1.26993	0.25728	4.93596	7.97568e-07	4.58537e-05	724.787	602.941	769.424	589.748	485.029	866.196	719.106	588.4	485.032	642.94	874.008	550.217	278.827	251.274	274.816
Adamts12	309.259	-3.06923	0.623768	-4.92048	8.63338e-07	4.94357e-05	75.4924	184.277	107.966	54.5445	157.426	71.3794	102.416	463.044	453.071	333.373	91.1005	166.302	1258.46	627.768	492.264
Dusp8	351.625	-1.54713	0.315286	-4.90706	9.24525e-07	5.27275e-05	185.285	316.91	209.155	347.829	240.814	166.817	206.554	251.014	223.777	366.431	243.321	312.964	762.053	911.286	530.173
Adra1d	531.52	-2.84659	0.580386	-4.90465	9.35925e-07	5.2954e-05	146.904	373.819	302.903	57.3657	342.026	139.785	297.842	728.522	857.631	413.305	186.996	246.964	1231.55	1805.78	841.402
Atp6v0a2	2090.86	-0.648389	0.132183	-4.90524	9.33121e-07	5.2954e-05	1717.96	1868.04	1427.54	1885.55	1666.09	1672.46	2235.39	2184.54	2612.25	1938.83	1894.89	2070.31	2530.86	2904.1	2754.08
C1galt1c1	574.92	0.735782	0.150049	4.9036	9.4095e-07	5.30279e-05	609.04	614.959	709.773	694.031	684.053	653.32	625.992	487.739	463.139	627.755	592.633	641.309	398.561	367.185	454.314
Foxn3	1144.54	-1.19899	0.244607	-4.90169	9.5016e-07	5.33362e-05	818.195	999.21	694.512	900.851	957.171	798.167	734.016	983.767	973.211	1263.25	938.918	1008.95	2745.51	1879.75	1472.65
Sh2d5	76.3085	3.11882	0.636537	4.89967	9.59959e-07	5.36749e-05	199.227	30.0066	56.5601	109.848	320.673	163.748	50.249	35.6897	25.893	31.1338	33.2885	19.9923	31.8245	16.7048	19.7893
Efemp1	2436.86	3.67922	0.751106	4.89841	9.66166e-07	5.38109e-05	5748.49	3401.11	1629.71	3469.86	4106.37	4193.6	3186.04	3292.43	1235.39	237.373	3868.47	1265.13	99.6894	233.758	585.391
Tfap4	582.969	0.960182	0.196096	4.89648	9.75662e-07	5.41284e-05	766.146	686.564	674.785	688.389	759.017	672.156	666.749	583.435	491.513	428.901	674.144	563.635	412.511	311.192	365.403
Pde8a	634.764	-2.42301	0.495533	-4.8897	1.00989e-06	5.58102e-05	388.592	799.891	377.243	316.684	298.439	230.719	192.622	754.971	255.615	510.97	361.631	498.207	2194.32	1562.62	778.938
Plxnc1	51.1602	-4.69073	0.959689	-4.88776	1.01989e-06	5.61454e-05	13.0439	67.319	5.07461	10.9311	3.96394	4.19373	12.8957	19.1524	10.639	52.7807	4.05656	77.5103	255.428	115.698	114.716
Mboat2	372.851	1.47839	0.30294	4.88014	1.0601e-06	5.81345e-05	457.885	373.619	412.02	526.296	422.863	522.782	376.371	230.129	397.783	438.333	438.677	467.382	108.268	155.217	265.141
Diras2	85.1116	-4.23783	0.869284	-4.87508	1.08763e-06	5.91886e-05	18.363	27.3783	10.9965	12.2255	4.68529	28.75	15.6759	178.015	22.8824	33.1424	51.7835	12.9457	489.234	188.438	182.159
Wnt7b	31.9333	9.55417	1.95973	4.87525	1.0867e-06	5.91886e-05	0	1.06968	2.031	372.716	12.5344	53.3746	13.8227	0	23.4503	0	0	0	0	0	0
B4galnt4	114.089	1.70205	0.349533	4.86949	1.11889e-06	6.06583e-05	121.4	117.937	111.964	153.289	158.363	225.043	128.543	136.855	83.2918	78.9568	161.104	69.7075	56.795	49.5323	58.5512
Amph	36.4951	8.40259	1.72621	4.86765	1.12933e-06	6.07623e-05	22.4437	46.3325	0	125.076	73.0906	184.397	22.9913	33.9565	29.2894	8.77298	0	0	0	1.07679	0
Neto2	839.544	2.87195	0.589996	4.86775	1.12876e-06	6.07623e-05	2107.67	1332.06	673.785	561.432	1517.1	2112.63	785.886	623.566	237.977	371.39	588.797	1108.35	173.374	292.887	106.26
Lepre1	1538.65	-1.42143	0.29219	-4.86476	1.14599e-06	6.14265e-05	834.093	1028.34	1018.38	842.777	1184.9	995.182	1293.08	2148.2	1397.69	1197.66	1670.61	1372.72	3206.56	3294.54	1595.09
Plod3	6857.52	-1.12372	0.231148	-4.86147	1.16516e-06	6.19884e-05	5785.47	5248.72	5654.27	3642.97	4254.42	5773.49	6599.08	9880.88	5240.07	6894.05	7008.83	7092.13	9897.74	10977.7	8913.01
Sepn1	2503.45	-0.695253	0.143012	-4.8615	1.16498e-06	6.19884e-05	2170.32	2491.27	2120.88	1990.73	2369.63	1894.42	2246.23	2664.65	2881.18	2244.85	2172.65	2177.77	3730.81	3397.83	2998.55
Ugt1a7c	128.024	2.85353	0.58714	4.86005	1.17356e-06	6.22032e-05	270.144	279.556	157.489	85.909	237.974	202.39	88.3297	92.8746	45.8765	149.949	126.774	107.561	52.8531	15.669	7.01245
Col16a1	2671.07	-1.43516	0.296151	-4.84605	1.25944e-06	6.65075e-05	2485.32	2131.83	2443.41	1128.47	2386.41	1241.49	2106.71	3571.31	3260.6	2233.59	2442.5	1768.82	5119.89	3556.2	4189.46
Hmga1	38518.8	1.45254	0.299872	4.84388	1.27326e-06	6.69896e-05	56210.9	45140.1	54902.6	48442	43218.3	49583.4	57023	26094	27375.3	29021.7	48660.4	40502.9	15896.9	14400	21310.3
Tppp	68.0594	-5.76383	1.19556	-4.82105	1.42807e-06	7.48579e-05	14.0734	8.07027	69.72	6.48664	4.30896	3.79896	18.7434	50.4712	2.10444	34.9655	2.20482	17.8602	108.437	660.2	19.4468
Trnp1	269.96	-1.95176	0.405632	-4.81166	1.4968e-06	7.81734e-05	122.905	166.559	301.092	125.742	180.508	83.6609	176.425	242.397	275.424	242.699	229.937	394.695	545.463	635.615	326.274
Rell1	1111.39	-1.06114	0.220709	-4.80787	1.52548e-06	7.93804e-05	689.915	908.095	905.819	720.337	840.5	807.339	995.826	1289.68	1230.73	1305.46	843.559	1192.34	1547.46	2055.4	1338.43
Dock8	426.541	3.73227	0.776551	4.80621	1.53822e-06	7.97523e-05	1304.79	570.733	163.948	792.776	510.697	1081.6	250.815	129.652	311.2	98.4523	361.525	642.305	9.96404	82.9128	86.7425
Rcan2	1186.69	-3.33936	0.695483	-4.80149	1.57488e-06	8.13574e-05	401.418	1010.65	487.324	145.828	415.759	248.811	1165.26	1889.96	648.976	1587.8	447.579	1151.71	3129	4682.37	387.87
Cdca7l	1163.51	0.94785	0.197506	4.79909	1.59385e-06	8.17452e-05	1441	1398.15	1158.31	1622.82	1335.54	1329.55	1455.65	1055.86	1274.25	867.565	1253.39	1037.57	873.375	641.367	708.309
Neurl1b	42.076	-2.92079	0.60854	-4.79967	1.5893e-06	8.17452e-05	20.1673	9.91264	6.58742	17.9936	13.2317	25.1977	25.5783	22.0611	6.03136	13.7642	22.568	20.6234	211.044	147.993	68.3869
Kcnk10	41.0878	2.94617	0.614224	4.79657	1.61409e-06	8.24864e-05	51.0084	121.096	45.9853	47.9615	101.202	78.3191	19.8562	14.4058	6.40706	16.5712	44.1118	39.8328	7.97123	13.9983	7.58997
Scin	20.9816	5.16633	1.07833	4.79105	1.65909e-06	8.44833e-05	15.2959	12.8898	19.297	26.2058	118.234	17.7363	40.3464	17.4402	5.88936	9.17856	18.0592	9.61124	1.06854	2.30949	1.16278
Mapk6	13025.4	1.59129	0.332315	4.7885	1.68035e-06	8.52611e-05	15441.3	12378.9	11807.2	26087.3	20268.6	14805.5	19051.6	6714.12	10977.2	13699.4	12764.4	11088.1	7208.14	5205.37	7884.48
Gm2223	22.8222	-22.5606	4.71284	-4.78705	1.69247e-06	8.5572e-05	0	0	0	0	0	0	0	0	151.024	0	0	0	191.309	0	0
Flywch2	98.1369	2.05978	0.430349	4.7863	1.69885e-06	8.55909e-05	198.034	98.4405	176.228	106.1	74.6972	126.748	149.878	77.0255	82.9811	112.63	92.2761	103.433	30.1115	31.4561	12.0146
Prnp	3088.27	-1.20912	0.252948	-4.78012	1.75194e-06	8.79546e-05	2077.22	2530.01	2460.52	2406.67	2084.36	1962.45	2924.67	3842.8	2362.63	2903.9	2474.33	3374.46	4830.51	6666.39	3423.09
Agpat3	2165.47	-0.915476	0.191629	-4.77733	1.77641e-06	8.88706e-05	1620.81	1772.75	1947.4	1822.09	1703.43	1429.87	2381.67	2183.77	1995.37	2513.27	1800.3	1961.29	2545.21	3845.38	2959.38
Maf	545.881	-2.83251	0.59318	-4.77513	1.79589e-06	8.95307e-05	226.086	237.374	214.451	173.332	100.547	227.303	319.49	1114.69	426.266	615.848	265.114	698.853	1158.01	2083.12	327.733
Tmem179	13.5612	6.75774	1.41737	4.76781	1.86243e-06	9.25246e-05	20.4034	18.9542	31.9898	19.7489	8.43353	34.6983	17.766	17.4928	3.66118	3.8991	13.4253	12.9457	0	0	0
Ptpn22	186.23	4.44295	0.932722	4.76342	1.90337e-06	9.42298e-05	367.369	140.098	402.269	264.988	110.533	176.327	464.224	72.2398	21.4709	162.383	234.86	350.194	0.918767	16.3533	9.22613
Lgals9	1430.76	-2.44043	0.513191	-4.75541	1.98046e-06	9.77075e-05	806.227	2198.1	813.383	271.663	392.455	327.012	1479.97	2790.49	3138.52	751.818	878.585	2232.96	943.973	1717.38	2718.81
Atoh8	317.634	-3.24042	0.681598	-4.75415	1.99284e-06	9.7979e-05	145.884	168.482	50.9837	166.455	33.7341	69.3967	73.1543	497	247.13	328.499	191.791	243.976	868.864	1302.92	376.246
Gm266	19.6355	4.87636	1.02592	4.75317	2.00256e-06	9.81184e-05	10.2017	12.6361	20.9933	13.1659	41.2306	129.871	15.6759	2.05797	4.57647	9.74776	19.1791	8.96239	2.98921	1.07679	2.16856
Mmp11	688.532	-1.07265	0.226362	-4.73864	2.15157e-06	0.000105058	811.547	527.191	899.845	340.497	444.501	362.675	817.86	734.533	641.322	849.897	730.035	752.928	636.94	879.341	898.86
Eva1a	244.884	-3.41215	0.720309	-4.73706	2.16846e-06	0.000105522	65.7955	99.1662	122.499	58.5288	52.3493	47.0131	166.2	323.956	163.04	419.12	26.914	447.505	356.45	1049.8	274.932
Necab2	153.939	3.53057	0.746285	4.73086	2.23574e-06	0.000108426	250.873	71.7881	146.041	366.356	109.514	482.76	361.319	137.795	118.113	18.987	133.086	29.0953	29.1124	17.2915	36.9599
Arhgap23	1732.54	-0.730627	0.154481	-4.72955	2.25023e-06	0.000108759	1787.83	1559.59	1388.35	1320.31	1347.42	1488.62	1446.67	1756.99	2041.23	1641.71	1586.75	1726.15	2147.35	2557	2192.15
Gm28635	13.6361	-22.2689	4.71315	-4.72485	2.30282e-06	0.000110924	0	27.3783	0	0	0	0	0	0	24.713	0	0	0	152.45	0	0
Spin2c	57.0395	2.11515	0.44803	4.72099	2.34698e-06	0.000112671	80.3496	64.4567	65.1762	59.9208	81.4579	66.9924	54.5652	129.701	76.9497	24.1538	43.2802	60.5963	16.7537	12.3879	18.8512
Fmod	131.92	-5.1533	1.09226	-4.71803	2.38138e-06	0.000113179	1.97987	5.10903	1.94011	8.00469	27.2786	4.81	2.02818	328.504	55.9547	23.6472	48.9746	38.6524	352.909	979.051	99.9541
Me3	43.6868	-2.67857	0.567702	-4.71827	2.37856e-06	0.000113179	14.8664	23.8857	21.1525	19.4907	16.9733	13.2906	27.268	25.7429	31.132	56.0815	33.7932	52.2296	56.2123	217.058	46.1253
Oaf	3554.07	2.30802	0.489135	4.71857	2.37508e-06	0.000113179	4823.35	3212.74	6117.05	3209.66	6460.08	4784.4	7442.92	2384.16	2286.41	1934.93	5333.7	2402.92	1119.96	1094.02	704.783
Kctd10	9214.81	-0.554613	0.117626	-4.71506	2.41637e-06	0.00011446	7970	7824.61	7803.7	8495.97	7345.58	6592.33	10214.5	9766.06	10322	10515.9	8908.28	9512.02	9998.42	11313.9	11639.1
Cdsn	187.923	-4.83001	1.02475	-4.71335	2.43681e-06	0.000115046	94.8756	34.7494	27.9911	30.0935	11.2447	31.7242	25.0815	228.435	9.15295	77.0073	83.4289	87.6323	1253.48	794.671	29.2756
Creb3l1	1037.56	-3.20561	0.680929	-4.7077	2.50529e-06	0.000117889	284.627	384.349	238.924	45.1402	299.859	492.716	294.707	1971.54	1347.31	1157.06	838.125	481.977	3496.38	2511.07	1719.67
Elovl1	2149.08	-0.859386	0.182589	-4.70668	2.51788e-06	0.000118092	1839.44	1972.6	2263.19	1600.91	1622.24	1601.42	1895.03	2402.99	1726.8	2460.06	1823.99	2274.97	3126.64	3262.12	2363.84
Ptprm	770.957	-1.47371	0.313202	-4.70528	2.53515e-06	0.000118512	643.726	1047.75	504.839	413.786	619.396	501.639	437.881	640.029	338.659	682.343	553.316	918.147	1355.11	1446.13	1461.61
Serpini1	157.464	3.05633	0.649863	4.70304	2.56311e-06	0.000119205	139.338	168.346	134.799	410.426	248.008	110.908	167.536	61.7043	365.764	101.071	226.29	134.492	23.8886	13.0195	56.3772
Tubb2a	2924.31	-1.11908	0.237962	-4.70276	2.56669e-06	0.000119205	2615.71	2772.58	2476.21	2047.3	2069.96	2162.2	2221.8	3846.35	2658.02	2285.85	2780	2289.39	4551.57	5863.12	3224.65
Fam114a1	1295.7	-2.01674	0.429793	-4.69236	2.7007e-06	0.000125021	631.264	826.563	476.214	508.948	922.829	587.176	730.837	2132.51	1260.57	1422.73	1112.36	653.367	3903.53	2559.44	1707.16
Lrrn1	119.849	10.3672	2.21214	4.68649	2.77929e-06	0.000128243	25.5042	113.725	87.9719	0	1406.52	1.98276	29.2617	45.2754	66.8165	11.6973	1.91791	5.97493	0	0	1.08428
Pth1r	24.052	-22.0854	4.71341	-4.68565	2.79072e-06	0.000128355	0	0	0	0	0	0	0	0	89.8004	141.096	0	0	129.883	0	0
Palm2Akap2	403.45	-6.38015	1.36328	-4.68	2.86869e-06	0.000131517	16.2449	193.802	0	5.28682	26.4969	13.9446	102.418	523.734	417.885	671.055	64.2595	205.084	1690.12	1229.2	892.214
Adh7	218.981	-4.27718	0.915439	-4.67227	2.97888e-06	0.000136131	26.5244	302.215	336.892	3.76169	70.2794	5.94829	196.471	90.5508	35.6965	162.788	224.395	276.838	466.317	526.55	559.489
Fam117a	272.379	1.28087	0.274243	4.67056	3.00384e-06	0.000136397	334.312	271.971	300.632	420.255	314.987	400.083	242.904	161.033	255.446	334.988	377.404	204.717	184.971	130.365	151.614
Itga2	97.6715	3.50632	0.750646	4.67108	2.99627e-06	0.000136397	221.376	190.595	231.926	31.9743	161.174	96.1639	24.0364	41.1594	138.21	70.1838	59.4551	173.273	4.98202	5.38395	15.1799
Map2k6	463.16	2.03986	0.436999	4.6679	3.04301e-06	0.000137737	937.75	511.376	422.947	684.17	632.508	908.284	454.91	351.38	398.019	237.781	638.554	227.582	118.097	160.397	263.65
Slc29a2	423.212	1.12324	0.240726	4.66607	3.07013e-06	0.000138525	627.403	454.901	484.845	692.15	435.732	617.63	397.123	304.58	254.452	425.002	495.779	357.5	288.957	261.66	250.469
Lrpap1	1207.08	-1.25137	0.268241	-4.66509	3.08487e-06	0.000138751	1090.27	919.815	798.416	746.541	685.082	840.841	1209.94	1906.35	1041.79	1290.62	1050.58	1116.37	1921.05	2256.73	1231.86
Gata3	544.121	-2.48283	0.533142	-4.65698	3.20888e-06	0.000143875	209.489	564.295	742.807	228.284	119.842	146.796	847.022	686.903	912.319	499.508	93.2774	347.991	1273.45	741.904	747.932
Stx2	1062.4	-1.01209	0.217455	-4.65422	3.25202e-06	0.000145352	765.381	1012.59	743.508	696.946	1023.09	616.571	975.116	1275.87	1081.44	1048.02	934.307	1050.96	1817.48	1496.32	1398.46
Slc1a4	1240.96	-1.16869	0.251199	-4.65244	3.28032e-06	0.000146159	924.443	974.26	606.257	1132.15	988.149	872.519	684.061	1272.81	866.11	1015.22	1357.29	1192.86	2374.13	2014.11	2340.05
Cdkn1c	540.974	2.85512	0.61444	4.64671	3.37272e-06	0.000149808	1460.89	398.142	294.302	1041.04	914.862	832.697	447.304	277.402	1154.49	173.432	244.608	490.05	131.717	173.638	80.0338
Otx1	17.4086	-4.58464	0.986845	-4.64575	3.38839e-06	0.000150036	0	4.21409	13.5779	0.940303	2.81082	4.95628	3.13479	2.1007	4.49016	1.94931	11.0438	3.988	42.4275	59.4093	106.085
Map2	589.96	-3.23902	0.698056	-4.64006	3.48314e-06	0.000153754	267.256	243.996	426.789	308.587	106.364	119.489	253.651	364.494	563.936	682.521	119.507	352.198	3109.23	1624.74	306.64
Gjb2	124.602	-5.15636	1.11176	-4.638	3.51789e-06	0.000154631	134.662	22.1133	70.9773	11.2851	0.937059	11.8966	42.8475	267.536	2.74588	90.6541	137.13	217.089	156.435	607.309	95.4168
Vdr	189.691	-4.48982	0.968134	-4.6376	3.5247e-06	0.000154631	45.1956	243.255	29.5253	6.95876	42.53	19.3168	45.6953	430.844	209.882	27.5404	127.081	88.2339	112.725	285.42	1131.16
Cirh1a	6030.69	1.1034	0.238031	4.63555	3.55981e-06	0.000155693	7100.37	6524.46	7309.67	8388.56	6345.76	8345.44	6440.71	5398.06	5773.68	4216.88	7102.01	6772.58	2873.63	3138.84	4729.64
Grem1	13454.6	2.08631	0.451671	4.6191	3.85414e-06	0.00016805	16998	21347.7	10379.7	14971.5	26875.8	20755.5	12968.2	5687.21	6637.72	9360.77	15932	25162.4	3304.07	3601.86	7836.1
Ifngr1	1406.08	-0.708231	0.153468	-4.61484	3.93398e-06	0.000170493	1093.59	1403.55	1123.85	1184.78	1332.05	941.118	1180.36	1364.27	1202.98	1577.24	1534.49	1503.39	1775.27	1949.25	1925.05
Tshz2	87.6154	-4.82913	1.04644	-4.61483	3.93408e-06	0.000170493	25.8722	155.931	17.1336	2.08982	4.69782	13.7202	44.4087	21.9674	268.171	29.2014	38.2099	106.453	279.609	48.4981	258.267
Col11a1	1697.35	-2.17899	0.47227	-4.61386	3.95265e-06	0.000170779	897.307	1099.21	481.445	730.123	504.193	1398.26	811.364	1893.63	2491.9	1005.87	867.368	1360.25	4261.24	5353.68	2304.42
Lrrc17	358.456	-2.73291	0.593144	-4.6075	4.07541e-06	0.000175022	190.771	256.935	172.945	112.851	165.859	148.707	120.182	714.116	296.555	105.276	102.608	148.377	250.097	1383.67	1207.89
Ptges	1452.44	3.04198	0.66022	4.60752	4.07506e-06	0.000175022	1274.37	1937.49	2962.69	1145.51	4293.48	1409.15	1525.02	1411.61	1243.66	936.274	2100.01	715.422	49.5722	264.825	517.528
Pcdh7	4399.09	1.75404	0.380926	4.60466	4.13142e-06	0.000176894	5406.31	5718.35	3487.73	7444.11	6667.9	6054.12	3759.21	4371.76	3892.92	5973.04	3846.34	3385.51	1470.99	3486.55	1021.49
Ramp1	10.5121	-3.44742	0.749043	-4.60244	4.17578e-06	0.000178258	4.73372	4.88612	3.71092	0.872737	3.47846	3.68011	12.608	11.8956	7.64476	4.52309	6.45713	6.46904	24.9666	44.8827	16.8719
Myl9	7285.88	-2.06272	0.448386	-4.60033	4.21826e-06	0.000179534	5527.81	6175.88	5221.15	2080.18	5581.46	1241.32	10685.3	6328.02	7892.69	6283.74	6308.42	8770.12	14387.7	15637.1	7167.39
Arg2	40.7594	3.53327	0.768372	4.59839	4.25763e-06	0.000180671	86.7143	42.1205	41.9866	168.336	44.9788	43.6208	57.4784	22.6377	8.23765	25.3442	28.7686	18.9206	4.98202	11.8447	5.42141
Hey1	60.8814	-3.72779	0.810882	-4.5972	4.28203e-06	0.000180751	25.4359	21.9026	39.6963	8.00211	12.4032	14.9968	26.6775	19.4571	22.8211	148.378	23.5727	80.9691	136.627	314.854	17.4273
Stt3b	7729.7	-0.395918	0.0861241	-4.59706	4.28487e-06	0.000180751	6955.5	7254.2	7134.72	7589.2	6483.51	6444.97	8354.22	8055.93	8097.61	7670.51	7265.03	7641.93	8605.94	8948.12	9444.09
Glul	1566	1.00329	0.218399	4.59384	4.35164e-06	0.000183026	1595.42	2037.91	1457.41	1967.91	2062.75	1863.63	1734.72	1539.38	2180.94	1529.68	1511.59	1068.07	1124.83	760.973	1054.86
Rasgrf1	189.734	6.25091	1.36148	4.59125	4.40598e-06	0.000184766	857.853	290.711	158.878	29.4749	330.577	156.741	110.909	213.771	17.4933	24.4939	53.4236	595.109	3.62785	0	2.94204
Fam64a	2043.55	0.631728	0.137632	4.58997	4.43308e-06	0.000185357	2123.53	2267.92	2555.16	2318.2	2230.42	2361.82	2295.41	2224.54	2216.97	1938.64	2087.92	1572.13	1333.69	1453.09	1673.8
Fez1	3444.62	2.31288	0.504795	4.58182	4.60956e-06	0.000191766	4317.37	4442.97	6457.22	3719.01	6286.54	3605.47	4174.81	1679.79	3495.51	2100.42	4956.01	3694.42	419.063	557.19	1763.59
Pradc1	221.125	-0.966771	0.211009	-4.58165	4.61326e-06	0.000191766	199.723	195.274	219.54	108	163.87	159.769	247.716	257.714	276.42	193.075	206.531	245.876	246.248	339.298	257.822
Siglecg	441.202	-3.65087	0.797112	-4.58012	4.64708e-06	0.000192611	223.476	585.523	142.768	74.1849	88.2186	49.4218	388.851	303.093	1219.99	125.662	307.743	449.786	100.422	692.158	1866.73
Gfod1	1403.52	1.72542	0.376853	4.57851	4.68311e-06	0.000193541	1161.97	1824.87	1020.67	2994.3	2515.07	1721.04	1895.74	644.145	1048.01	1169.73	1381.85	1488.75	660.616	553.47	972.601
Pygl	156.399	2.86248	0.625343	4.57746	4.70656e-06	0.000193948	116.141	142.296	85.1248	118.377	437.991	129.747	157.665	173.145	222.466	257.132	300	111.71	30.0222	7.97312	56.2001
Chpt1	786.208	-1.32746	0.290253	-4.57345	4.7975e-06	0.000197126	608.655	669.512	530.639	404.403	625.74	498.888	594.451	872.584	677.878	1208.14	604.007	662.818	1430.18	1414.72	990.504
Naf1	1347.78	0.769322	0.168267	4.57204	4.82997e-06	0.00019789	1298.67	1378.39	1371.56	1755.77	1776.66	1643.71	1381.57	1456.02	1210.93	1257.46	1406.78	1241.79	901.745	832.358	1303.31
Fancg	220.916	-1.21712	0.266587	-4.56558	4.98115e-06	0.000203499	178.816	167.383	172.318	143.559	141.942	94.6526	259.299	329.577	312.521	288.963	139.557	200.923	285.196	304.643	294.388
Ptgs2	7786.43	1.64166	0.359913	4.56128	5.08418e-06	0.000207115	8854.88	8919.69	7852.46	19950.4	8243.68	10005.8	5920.32	2327.76	4946.36	10059.8	7646.06	9827.03	4007.2	3302	4932.95
Acer2	35.4664	2.10189	0.461128	4.55815	5.16056e-06	0.000209038	33.7463	50.6265	48.2163	51.2162	56.382	79.8383	23.9482	18.8529	35.3357	31.1951	30.4938	27.2543	6.19533	18.1505	20.5451
Mkx	290.909	-2.98787	0.655502	-4.55815	5.1607e-06	0.000209038	103.353	95.2688	193.396	78.461	70.3478	71.5635	96.5611	649.685	147.275	687.559	177.159	245.364	739.816	704.13	303.699
Steap3	895.724	-1.95861	0.429882	-4.55617	5.2096e-06	0.000210421	606.304	735.669	749.741	394.527	446.834	484.243	541.291	1667.32	394.159	818.239	549.97	895.433	2115.97	1777.41	1258.75
Il18rap	730.716	1.82814	0.40156	4.55258	5.29908e-06	0.00021343	919.501	1604.92	772.799	720.612	924.488	840.492	518.665	675.314	1310.85	783.341	367.503	822.976	273.42	183.761	242.107
Esm1	621.095	9.6843	2.12988	4.54688	5.44463e-06	0.000218675	4474.46	16.8482	71.977	126.017	74.9647	3340.95	10.4506	64.8261	25.6283	4.87388	1095.12	5.97493	0	1.07679	3.25284
Mest	1693.59	-4.38555	0.966243	-4.53876	5.65855e-06	0.000226628	227.405	1489.46	1240.37	92.188	313.493	150.658	448.089	4124.32	4326.93	115.625	276.034	980.528	5691.32	4328.98	1598.45
Oraov1	274.831	-0.863839	0.190478	-4.53512	5.75714e-06	0.000229931	230.856	266.195	321.401	175.508	230.698	210.965	255.571	266.089	282.282	252.404	240.3	265.748	418.361	402.131	303.948
Rbm43	328.817	-1.14952	0.253509	-4.53441	5.77636e-06	0.000230054	290.968	339.173	279.152	182.392	279.549	207.059	294.973	385.525	291.498	330.945	288.97	278.593	593.378	558.103	331.974
Gca	104.238	-2.9542	0.651918	-4.53156	5.85499e-06	0.000231248	37.497	48.0639	100.77	68.8563	17.1384	18.1192	57.5922	94.209	83.5139	106.755	96.2974	39.2839	254.963	441.387	99.1282
Ier3	4055.12	1.41488	0.31222	4.53169	5.85135e-06	0.000231248	4410.19	3811.9	4445.58	6331.86	3967.51	6302.21	5098.85	2603.33	2974.71	4738.38	6386.63	3529.19	1667.98	1845.62	2712.87
Slc1a1	22.5804	-3.84451	0.848342	-4.53179	5.84859e-06	0.000231248	3.06114	4.74753	6.10025	5.63079	3.03553	7.36856	6.78307	11.8001	5.24817	15.0588	10.0895	29.0795	85.9153	134.975	9.81312
L2hgdh	789.943	0.798552	0.176526	4.52371	6.0766e-06	0.000239338	837.558	974.036	794.746	932.898	878.961	1096.47	845.454	718.232	621.485	768.123	788.259	921.134	579.907	466.25	625.63
Tmem43	3227.68	-0.677126	0.149708	-4.52299	6.09718e-06	0.000239487	2543.19	3226.22	2927.03	2081.1	3084.54	2609.11	3207.3	3201.55	3171	3130.75	3243.9	3558.16	4084.5	4203.21	4143.61
Slc20a2	2923.17	0.759424	0.168022	4.5198	6.18986e-06	0.000242459	3669.54	3500.21	2432.22	3632.85	3274.08	3515.44	3031.72	3066.38	2689.14	2776.16	3209.62	2892.86	1824.41	2013.6	2319.28
Sh3gl1	3372.13	-0.486303	0.107694	-4.51558	6.3145e-06	0.000246664	2714.67	3111.65	2920.07	2825.97	3035.13	2828.41	3434.07	4000.7	3329.84	3094.91	3543.33	3570.02	3962.7	4168.25	4042.2
Cables1	114.678	-4.33157	0.959754	-4.51321	6.38532e-06	0.000248071	21.5175	17.6197	8.91265	9.31591	9.2826	36.3367	31.0574	288.469	18.134	74.3529	22.7988	77.8522	528.071	518.444	58.0014
Pla2g7	346.4	3.4095	0.75544	4.51326	6.38374e-06	0.000248071	469.905	825.501	444.148	74.2285	1413.55	268.709	182.5	247.453	470.894	181.033	99.0887	353.406	40.977	68.3116	56.2874
Slc25a30	1345.44	0.825055	0.183004	4.50839	6.53211e-06	0.000252962	1653.69	2007.04	1275.59	1719.09	1857.25	1472.2	1098.36	890.073	1158.76	1309.12	1539.12	1351.33	938.612	978.802	932.482
Tcp11l1	204.276	-1.10068	0.244166	-4.50792	6.54671e-06	0.000252962	199.816	134.26	189.312	102.131	142.043	161.668	157.651	218.915	210.022	245.369	187.357	246.931	260.471	314.833	293.366
Angpt2	82.8748	1.24316	0.275835	4.50689	6.57855e-06	0.000253505	77.0986	63.5567	55.0553	107.236	104.595	77.937	125.984	138.042	117.429	79.2594	93.212	82.1595	40.9689	50.7401	29.8477
Ckap4	11754.9	-0.793668	0.176257	-4.5029	6.70324e-06	0.000257614	9575.08	10209.4	10043.7	9543.42	11162.3	7375.13	10669.4	13852.8	10554.6	11190.8	12247.8	11222	17433.8	17443.2	13800.7
Arap2	32.2146	3.09166	0.686761	4.5018	6.73798e-06	0.000258253	46.0551	46.4731	88.5247	93.1169	20.4065	39.1561	22.7584	12.5066	39.8651	23.4058	11.6554	20.9598	5.8804	7.47866	4.97702
Sulf1	2889.13	-2.75788	0.613122	-4.4981	6.8565e-06	0.000262091	1608.66	941.441	3423.26	1215.38	606.692	1097.8	2628.52	2152.28	1755.45	4357	1857.83	1940.42	10379.2	8135.88	1237.09
Arhgap29	687.592	-1.3566	0.301704	-4.49645	6.90961e-06	0.000263415	991.603	487.545	559.821	299.995	416.991	493.708	605.09	590.638	658.097	710.611	528.383	871.343	905.731	1283.53	910.797
Atxn1	856.844	-1.14546	0.254857	-4.49454	6.97202e-06	0.000265085	591.85	939.19	544.213	637.139	666.51	619.467	507.665	822.957	883.772	741.183	736.383	908.261	1647.88	1235.15	1371.03
Robo2	167.652	-3.35329	0.746382	-4.49273	7.03164e-06	0.000265934	60.8446	106.061	54.3516	62.0436	49.1699	24.3894	53.8979	218.147	124.567	173.39	51.9469	133.887	710.434	634.247	57.3971
Synm	233.002	-4.57154	1.01745	-4.49314	7.0181e-06	0.000265934	90.4641	51.1522	34.4164	38.6736	28.3225	47.0285	39.4592	267.275	16.7861	40.0844	24.8126	105.865	870.629	1815.18	24.886
Nuak1	1723.18	-1.99869	0.44502	-4.49125	7.08078e-06	0.000267084	768.343	927.695	429.953	1083.86	993.62	1030.59	763.272	1429.64	2891.76	794.94	703.233	1609.55	3210.13	4123.23	5087.82
Hmga2	32737.8	1.00802	0.224667	4.48673	7.23235e-06	0.000271365	45374.7	40693.2	39823	39802.2	49007.2	29959.4	33849.4	26820.3	34936.5	30569.3	27551.2	33624.2	14110.6	21922.6	23022.7
Slc41a3	111.587	-1.46041	0.325476	-4.48701	7.22313e-06	0.000271365	101.989	109.484	83.9507	49.829	60.8925	48.5646	81.4929	190.311	130.461	162.744	113.126	102.542	155.397	141.022	142.003
Cd53	26.7178	4.43129	0.988342	4.48356	7.34069e-06	0.000274707	21.4235	27.3783	9.99681	31.0339	63.72	113.017	13.5858	5.14493	25.6283	13.6469	58.4961	7.96657	0	4.30716	5.42141
Mrc1	28.9287	3.91229	0.873537	4.47868	7.51065e-06	0.000280332	68.8018	18.0585	70.5439	74.688	25.775	44.741	26.1039	25.0766	4.57252	19.4786	36.3532	9.88712	4.97771	2.91573	1.95735
Txndc16	477.06	-1.06094	0.237342	-4.4701	7.81841e-06	0.000291057	296.429	399.398	365.831	376.033	350.167	284.396	400.902	444.247	614.412	590.203	548.472	377.03	811.368	659.982	637.033
Mn1	252.498	-3.14564	0.704037	-4.46801	7.89514e-06	0.000293148	85.6209	133.086	94.7593	141.142	96.2253	40.1341	63.9768	108.713	382.828	24.0621	73.8552	86.5273	546.965	325.343	1584.24
Il11	128.973	3.68584	0.825827	4.46321	8.07403e-06	0.000299012	146.672	169.317	113.065	243.142	88.0189	512.515	316.528	43.3956	28.9055	76.0449	55.1722	76.358	33.4262	26.8341	5.19631
Gpr149	2477.82	4.50617	1.01001	4.4615	8.13898e-06	0.000300636	2752.1	3679.73	3059.23	5712.61	8164.94	3930.34	668.954	497.359	3479.47	1171.52	1296.57	1970.93	26.033	42.1877	715.307
Pgm2l1	412.132	1.45085	0.32539	4.4588	8.24212e-06	0.000303659	439.735	568.23	402.569	661.799	865.055	453.418	313.442	212.717	500.02	299.517	344.938	396.251	237.967	201.418	284.902
Eef2k	1072.77	-1.27701	0.286491	-4.45743	8.29465e-06	0.000304807	751.369	866.316	977.017	556.563	841.074	778.371	970.235	1266.75	769.184	1061.67	892.972	1088.02	2274.41	1932.64	1064.96
Trappc3	1488.92	-0.656607	0.147648	-4.44712	8.70292e-06	0.000318988	1465.45	1340.76	1774.58	1284.96	1106.53	1100.7	1584	1348.33	1460.15	1391.47	1418.06	1553.43	1800.49	2068.08	1636.75
Cd14	232.342	2.12859	0.479245	4.44156	8.93093e-06	0.000326506	324.413	173.747	264.915	344.194	284.866	334.095	241.409	377.638	67.7318	257.341	389.335	205.139	65.7626	73.2217	81.3211
Bag5	1024.35	-0.739004	0.166466	-4.43937	9.02217e-06	0.000328512	989.446	1051.14	1083.75	595.945	746.551	912.874	950.041	1091.52	976.137	1069.75	955.425	1179.63	1321.73	1312.26	1129.12
Fzd8	409.657	-1.15812	0.260889	-4.43914	9.03189e-06	0.000328512	304.01	288.525	277.911	294.352	205.216	362.845	398.168	458.928	345.981	572.193	397.007	315.675	611.792	740.831	571.416
Irgm2	172.904	-2.76034	0.621996	-4.43787	9.08522e-06	0.000329611	106.137	175.912	65.0005	41.3931	33.7454	59.506	196.536	424.077	198.696	157.48	48.9228	174.329	334.905	491.235	85.6867
Stc1	841.563	3.05624	0.689485	4.43264	9.3088e-06	0.000336865	532.528	785.547	1136.64	970.515	4238.32	532.372	1104.63	255.189	756.949	447.422	931.143	241.985	252.09	145.367	292.756
Erap1	760.064	-1.00568	0.227079	-4.42876	9.47783e-06	0.000342114	596.798	718.154	475.848	548.266	655.004	540.303	678.245	768.653	765.186	703.788	590.715	859.394	1408.91	1230.77	860.92
Hey2	16.2155	-4.21777	0.953816	-4.422	9.77912e-06	0.000352098	7.14118	5.26506	25.9917	4.70211	0.937059	0	4.18024	9.26088	7.32236	20.4703	21.097	30.8705	22.9173	59.2234	23.8542
Pmpca	5862.17	0.407793	0.0923218	4.41708	1.00044e-05	0.000359303	5496.69	6174.78	5384.22	6743.95	6243.18	7433.85	5936.37	5841.87	5840.73	5986.39	5657.09	5800.82	5020.31	5039.16	5333.11
Zfp580	191.236	-1.38728	0.314136	-4.41617	1.00466e-05	0.000359909	187.711	180.065	242.922	75.2337	98.3911	148.707	190.201	249.015	146.447	141.342	191.791	174.269	279.989	353.187	209.266
Nrcam	76.3503	5.24745	1.18939	4.41189	1.02473e-05	0.00036618	145.799	41.372	341.629	115.488	17.751	35.4734	46.1928	64.9746	36.7532	13.7389	224.386	57.1398	0	1.13322	3.42331
Kdelr2	5268.14	-0.692241	0.157067	-4.40729	1.04672e-05	0.000373102	4487.72	4126.76	4886.44	4363.56	4170.85	4268.89	5628.7	6914.79	4929.78	4678.92	5342.33	4535.96	6911.05	7872.41	5903.91
Plin2	4538.66	1.56845	0.356009	4.40564	1.05471e-05	0.000375013	6175.17	4625.99	5808.91	9962.37	4297.53	5132.04	4879.07	2498.91	5054.18	3855.55	4091.66	5159.77	1843.43	1679.74	3015.56
Qdpr	1520.97	0.874286	0.198547	4.40342	1.06559e-05	0.00037794	1674.56	1643.96	1708.83	2405.81	1607.57	1966.63	1808.26	1439.86	1287.39	1359.46	1430.52	1219.01	873.927	1286.08	1102.72
Mrvi1	68.0546	-4.36713	0.992496	-4.40015	1.08177e-05	0.000382727	20.476	34.2102	6.32937	18.4518	16.6141	2.51073	20.1609	36.0941	50.8923	0.617169	32.0353	35.3011	139.416	480.693	127.017
Tead3	1520.09	-1.16236	0.26447	-4.39505	1.10746e-05	0.000390845	1076.58	1439.53	950.608	618.085	1083.47	1320.3	1348.61	1665.19	1530.05	1692.93	1587.14	1725.96	2589.06	2372.92	1800.86
Rgs2	519.197	2.73811	0.623496	4.39154	1.12549e-05	0.00039623	560.031	501.342	527.372	640.183	2156.09	559.662	597.972	319.893	232.059	226.449	728.18	235.742	174.714	269.369	58.9077
Dcn	3409.01	2.14571	0.488662	4.39099	1.12837e-05	0.000396263	7806.33	4644.84	4111.69	1812.19	6247.37	3242.81	2692.08	2292.58	4217.68	5925.66	4085.14	1502.69	887.796	963.727	702.614
Smap2	1250.71	-0.672634	0.153418	-4.38434	1.1634e-05	0.000407563	1048.74	1187.13	967.691	1009.32	914.86	1027.93	1109.29	1399.68	1437.96	1457.82	1388.58	1106	1631.35	1584.68	1489.64
Hspb8	883.654	-2.34595	0.535241	-4.38297	1.1707e-05	0.000409115	538.237	603.876	869.687	299.921	373.789	324.063	946.919	1274.61	366.895	718.668	974.545	890.882	1971.37	2701.61	399.734
Parp12	715.133	-1.9808	0.45231	-4.3793	1.1906e-05	0.00041505	550.845	876.392	366.155	182.65	382.422	290.04	846.034	1026.36	862.739	734.656	250.886	982.071	1079.28	1463.15	833.317
Plekhg2	1754.77	-0.967552	0.221013	-4.3778	1.19881e-05	0.000416894	1657.73	1431.23	1162.23	1076.02	1572.3	1665.89	1420.36	1410.93	1330.16	1807.74	1749.68	1601.84	3195.69	3191.63	2048.07
PCDHGA12	172.012	-2.78687	0.637438	-4.37199	1.23122e-05	0.000427121	77.8048	111.093	25.2221	98.0769	82.7983	44.016	74.9073	176.694	91.9435	140.258	50.9752	54.0537	625.167	161.33	765.842
Crlf3	1080.68	0.696427	0.159397	4.36914	1.24739e-05	0.000431681	1118.46	1252.63	1113.58	1465.63	1408	1190.26	1010.8	837.947	1168.74	961.699	1193.62	980.939	897.335	804.714	805.837
Tmem199	982.483	0.925965	0.211961	4.36857	1.25064e-05	0.000431757	1209.49	988.651	1377.87	1288.54	893.611	1207.36	1186.49	824.711	961.475	902.278	1035.24	1077.01	489.503	634.719	660.29
Hspd1	36748.4	0.839697	0.192393	4.36448	1.27425e-05	0.000438847	42439.1	36368.3	45279.6	50402.7	33677.6	52113.4	37576.9	33390.3	33620.8	37299.9	37186.7	35770.4	23964.7	21212.9	30922.1
Col27a1	185.174	-1.98948	0.456043	-4.36248	1.28595e-05	0.000440747	84.9866	79.7582	50.583	64.9339	239.941	95.2363	59.2237	123.651	105.768	96.0298	100.331	88.1452	483.613	729.87	375.54
Myo7a	676.942	-1.60083	0.36692	-4.36288	1.28359e-05	0.000440747	598.16	520.933	335.784	283.473	635.917	414.107	465.76	703.565	496.793	580.234	420.852	655.202	1708.81	1553.13	781.405
Fam101b	397.171	-1.44797	0.332005	-4.36129	1.29296e-05	0.000442088	322.373	231.663	328.895	307.518	238.013	270.647	267.536	250.044	615.078	264.164	245.492	389.366	708.443	730.063	788.273
Vps11	2159.57	0.488302	0.112003	4.35974	1.30217e-05	0.00044417	2215.8	2293.46	2091.33	2443.22	2187.09	2541.9	2573.99	2291.55	2416.38	2030.46	2080.93	2114.13	1571.33	1608.72	1933.27
Tmem119	1292.11	-1.97136	0.452317	-4.35836	1.31043e-05	0.00044592	703.284	974.046	305.456	485.083	931.68	641.893	748.607	2561.88	1123.1	900.826	927.221	1004.59	2152.27	3222.65	2699.06
Dock4	506.004	1.46187	0.335631	4.35559	1.32706e-05	0.000450505	446.834	727.632	481.846	656.414	1020.46	857.544	419.069	381.754	598.603	197.879	446.872	435.174	322.835	354.264	242.879
Enkd1	508.152	0.897154	0.206065	4.35375	1.33828e-05	0.000453236	587.617	553.884	810.741	570.836	493.83	683.061	644.803	562.855	530.871	369.44	455.503	420.236	276.004	296.117	366.487
Antxr2	2041.4	1.09534	0.251898	4.34833	1.37176e-05	0.000463471	2200.5	2046	2403.23	2502.46	3788.53	1924.27	2186.27	2066.2	2815.45	1609.35	1588.99	1644.1	944.591	1476.28	1424.75
Cd300lb	40.7952	5.40554	1.24417	4.34469	1.39472e-05	0.000470117	31.8728	26.5019	54.4093	65.2918	60.9921	179.012	86.8089	7.3206	4.76604	3.38384	68.8372	15.7437	6.05312	0.934494	0
Yif1b	1237.33	-0.746787	0.171916	-4.3439	1.39973e-05	0.000470692	1166.49	1128.81	1380.53	978.093	982.321	985.861	1481.15	1259.97	1069.97	1045.17	1033.86	1103.71	1629.37	1977.92	1336.78
Dusp5	1502.43	1.61953	0.373221	4.33933	1.42918e-05	0.000477219	1954.64	1365.76	2739.13	1989.93	1830.08	1683.36	1723.31	976.508	692.878	1739.97	2055.04	1994.63	472.295	400.566	918.386
Prickle3	73.0662	2.16415	0.498712	4.33949	1.42815e-05	0.000477219	77.443	102.919	67.1792	49.2071	106.453	178.562	65.4072	89.3934	73.9797	94.4884	75.3686	41.3831	30.9142	14.2347	29.0607
Rbm38	999.619	1.62048	0.373361	4.34026	1.42315e-05	0.000477219	1225.68	1137.8	1308.61	1578.86	1191.28	1650.95	1065.3	400.954	1197.88	815.211	971.101	1012.12	338.946	370.586	729
St3gal6	440.166	3.41473	0.787479	4.33628	1.44913e-05	0.000482751	484.554	1049.75	1009.09	152.562	430.136	408.639	361.146	281.248	1469.78	105.617	90.1637	666.819	12.1375	30.2815	50.5742
Traip	1168.41	0.813168	0.187792	4.33015	1.49008e-05	0.000495233	1189.2	1302.84	1155.87	1283.56	1350.75	1463	1241.82	1191.46	1351.92	1124.27	1339.23	1202.42	605.071	691.909	1032.89
Megf6	96.717	-7.94402	1.83519	-4.32871	1.49983e-05	0.000497315	0	2.92259	0	1.83503	0	7.59219	1.29939	8.84852	0.529982	0	5.32306	0	798.198	550.462	73.7438
D5Ertd579e	2087.3	-0.857384	0.198109	-4.32784	1.50578e-05	0.000498132	1612.05	1687.1	1568.18	1867.72	1508.64	1630.61	1700.55	2183.21	1990.05	2850.94	1658.24	1981.26	3356.26	2908.15	2806.51
Cdk5r1	85.6903	1.02047	0.235977	4.32445	1.52914e-05	0.000504686	98.9284	81.6907	73.6757	134.057	109.6	145.167	61.1161	64.8593	66.5689	75.6213	81.8332	99.4644	60.8731	71.9675	59.933
Bdnf	1757.04	0.773951	0.179449	4.31292	1.61109e-05	0.000529335	2475.03	1667.62	1902.16	2385.08	2113.19	2374.33	1092.9	1187.89	1184.61	1858.01	1963.53	2132.16	1347.51	1589.61	1081.95
Snx7	1456.21	-1.26189	0.292585	-4.3129	1.61125e-05	0.000529335	1165.45	1080.85	1193.51	1212.05	538.034	1162.32	1111.01	1547.83	1139.89	1510.07	1550.44	1647.38	2673.02	2686.05	1625.24
Gm7233	15.2428	6.59345	1.52921	4.31166	1.62037e-05	0.000531108	90.7949	21.0602	16.9946	37.6169	7.49647	10.9052	14.6309	3.08696	2.74588	6.82343	11.5074	4.97911	0	0	0
Akr1b8	2395.1	1.18606	0.275123	4.31101	1.62511e-05	0.000531441	2903	2525.44	3134.16	2145.55	3430.32	3111.11	3059.4	1969.53	2523.98	2332.94	2732.63	2240.13	950.099	1031.05	1837.19
Fgfr2	1633.27	-2.01253	0.46699	-4.30958	1.63566e-05	0.000533668	1006.21	1178.58	870.326	713.019	855.771	1098.46	842.009	2466.33	985.005	1605.2	759.7	1356.63	4281.29	4999.21	1481.29
Hsdl2	454.918	-0.897838	0.208546	-4.30523	1.66809e-05	0.000541768	330.45	499.735	411.942	304.936	354.947	295.628	408.454	460.759	611.74	521.148	407.771	435.337	600.982	632.69	547.246
Tnn	1121.89	-5.89294	1.36866	-4.30563	1.66513e-05	0.000541768	147.429	2284.78	21.7693	35.3725	67.4053	40.2331	260.676	815.834	159.897	271.888	130.04	4095.55	1335.48	4650.24	2511.81
Serpinb6a	9025.68	0.459336	0.106717	4.30426	1.67546e-05	0.000542925	10050.5	9459.32	9870.9	9116.31	10494.4	9518.86	8401.43	8799.45	7687.57	9227.26	11059.2	10513.1	6637.09	7027.17	7522.55
Lamc3	21.8392	2.89107	0.672706	4.29767	1.72605e-05	0.000557391	36.726	26.3253	30.9901	36.6765	44.0417	20.819	25.0815	11.3188	15.56	17.546	26.8507	21.9081	3.98561	0	9.75853
Mndal	131.179	-3.63583	0.846047	-4.29743	1.72792e-05	0.000557391	142.93	160.797	135.655	21.7126	28.1208	20.1667	60.2339	143.76	119.348	160.917	28.5018	73.2237	672.806	181.877	17.6355
Rnf10	7291.67	-0.436204	0.101592	-4.29371	1.75714e-05	0.000565538	7274.72	6414.16	6518.81	6571.19	6098.63	6319.93	8369.55	6912.21	7264.01	7739.72	6909.4	7288.74	8248.59	8711.75	8733.67
Rorb	79.1162	2.95939	0.689729	4.29065	1.78152e-05	0.000572093	161.311	139.662	111.628	107.506	65.2372	94.7887	33.0872	64.3293	105.464	25.6608	170.689	75.284	2.58379	13.8325	15.6792
Gm1045	15.7949	5.82642	1.35814	4.29002	1.7866e-05	0.000572434	13.2622	5.26506	3.99872	30.0935	8.43353	140.776	5.2253	7.2029	0	10.7225	4.79477	3.98328	0.996404	0	2.16856
Lrrn3	373.977	2.87566	0.671213	4.28427	1.83343e-05	0.000586121	357.059	470.697	204.935	104.387	1600.5	693.967	289.482	327.218	223.332	209.577	542.767	258.913	118.572	146.443	61.804
Jdp2	1000.59	-1.39475	0.325637	-4.28315	1.84266e-05	0.000587755	639.271	1057.89	929.546	446.727	962.238	511.013	817.532	965.116	1380.23	776.482	537.913	936.022	1716.04	1686.88	1646.02
Mafb	152.981	-3.67323	0.859112	-4.27561	1.90617e-05	0.00060551	13.2622	10.5301	10.9965	22.5701	29.9859	15.8621	54.3432	944.609	44.8494	75.0577	147.679	51.7827	309.881	386.567	176.738
Map6	1513.48	-1.50428	0.351875	-4.27504	1.91106e-05	0.00060551	1203.88	1310.7	1305.73	931.607	1003.86	704.502	1113.04	1079.71	1467.26	1428.91	1163.74	2499.82	2771.93	3447.91	1269.55
Pgd	5359.97	0.625034	0.146202	4.27515	1.91007e-05	0.00060551	6144.54	6221.97	6593.01	6034.14	5257.46	5364.8	6464.99	4791.55	4722.35	5661.54	6801.06	5542.01	3579.91	3754.01	3466.23
Gal3st3	28.1844	3.58183	0.838581	4.2713	1.94337e-05	0.00061438	51.0084	15.7952	12.9959	29.1531	97.4541	38.6639	29.2617	32.9276	32.9506	10.7225	46.9887	10.954	1.99281	4.30716	7.58997
Kif26a	32.2453	3.89412	0.911931	4.2702	1.95301e-05	0.000616064	18.9562	25.0451	12.6313	40.8384	142.796	150.68	6.21399	5.35361	19.8736	4.34705	20.8215	8.88181	21.6347	4.80199	0.805899
Wls	3651	-0.872266	0.204438	-4.26665	1.98433e-05	0.000624559	3115.59	2762.05	4270.64	2371.74	3002.34	2809.57	3542.76	3662.16	3847.9	3341.53	3901.02	3156.75	4074.29	4693.73	6212.93
Fzd4	517.022	-2.56951	0.602356	-4.26576	1.99219e-05	0.000625652	217.296	398.039	245.921	192.786	206.153	277.587	214.238	483.623	270.927	493.236	232.067	507.869	1483.64	2317.25	214.688
Sgms2	1411.2	1.50389	0.352622	4.26488	2.00007e-05	0.000626748	1492.52	1826.17	1540.3	2427.3	1837.73	1624.03	2432.47	956.487	764.434	1534.31	1366.23	1289.65	774.06	607.592	694.759
Frzb	313.067	3.1476	0.739506	4.25636	2.07786e-05	0.000648275	283.461	848.865	305.203	185.575	565.74	533.921	118.302	307.09	81.2626	103.658	496.72	720.777	30.762	92.3439	22.3167
Ror1	31.8751	-4.23216	0.994291	-4.25646	2.07688e-05	0.000648275	5.10084	4.21205	11.9962	9.40422	2.81118	1.98276	8.36049	76.145	27.4588	10.7225	30.6865	21.9081	184.335	69.9913	13.0114
Fech	1449.87	-0.891506	0.209589	-4.25359	2.10371e-05	0.000654907	1003.85	1325.74	1231.61	947.005	1215.36	797.07	1584.31	1829.54	1909.3	1884.24	1295.55	1233.82	1915.09	1781.01	1794.49
Cxcl15	200.417	-9.28989	2.18522	-4.25124	2.12589e-05	0.000660371	0	4.21205	0	2.82127	0.937059	0.991381	0	12.3478	1.83059	5.84865	0	0.995821	240.133	2735.05	1.08428
Mmp13	690.692	4.72495	1.11301	4.2452	2.18396e-05	0.000676931	484.58	527.559	749.761	1275.21	51.5382	622.587	1248.85	834.508	152.854	2726.45	168.776	1443.94	7.97123	49.5323	16.2642
Fuca2	512.464	-1.1479	0.27053	-4.24317	2.20384e-05	0.000681614	539.275	447.906	544.331	438.897	310.204	277.851	378.575	705.783	462.062	508.582	333.283	462.743	870.858	708.637	697.971
Csrp1	9304.54	-1.06343	0.25066	-4.2425	2.21044e-05	0.000682173	7430.63	8962.68	8933.67	5944.85	8061.94	5123.79	10180.5	8758.02	9830.11	6543.08	7685.42	12131.9	12218.8	16283.7	11478.9
Glt8d2	103.048	-2.12518	0.50134	-4.23899	2.24524e-05	0.000688442	73.7337	70.7054	40.075	37.8177	81.6673	33.5051	60.6235	164.155	73.674	76.4878	68.4754	93.8842	202.164	341.717	127.04
Has1	40.7603	3.93382	0.928	4.23904	2.24481e-05	0.000688442	100.997	68.4458	56.9818	20.6893	157.426	48.5777	8.36049	15.4348	15.56	13.6469	83.4289	6.97075	2.98921	4.30716	7.58997
Jph4	45.9629	2.01819	0.476006	4.23985	2.23672e-05	0.000688442	47.5846	75.2236	50.8006	92.4402	61.1855	66.2696	51.4856	55.2303	58.3109	11.7803	35.8972	26.6844	9.5327	29.5802	17.4378
Slc9a8	990.663	0.798086	0.18836	4.23702	2.26502e-05	0.000693018	951.66	1052.25	824.298	1243.77	1581.68	1220.82	847.16	1113.82	1204.4	953.332	810.187	730.568	812.76	686.496	826.736
Galnt12	82.6413	1.36551	0.322748	4.23088	2.32778e-05	0.000707665	100.032	90.6332	83.8646	111.68	78.0134	114.579	101.335	107.624	72.7965	104.155	89.2287	68.2752	52.7003	38.7143	25.9891
Habp4	588.346	-0.855585	0.202208	-4.23122	2.3243e-05	0.000707665	568.234	454.901	519.834	430.713	387.005	482.802	578.964	661.638	479.614	588.764	602.222	717.987	881.817	877.584	593.102
Sp5	15.1868	6.61513	1.56349	4.231	2.32654e-05	0.000707665	12.242	10.5301	7.99745	15.9872	74.9647	19.8276	6.27037	7.2029	12.8141	0.974776	47.9477	9.95821	0	0	1.08428
Fam195a	462.47	1.62078	0.383362	4.2278	2.35986e-05	0.000715892	566.193	367.501	849.729	634.785	372.012	787.156	689.74	363.232	358.796	341.171	600.305	423.224	208.248	184.131	190.834
Iigp1	119.867	-4.11634	0.97389	-4.2267	2.37142e-05	0.00071787	73.8668	133.429	20.1065	6.62012	33.9246	3.98791	126.115	275.255	133.467	74.5012	15.4299	127.183	285.578	463.468	25.0793
Limch1	286.366	-5.24579	1.24135	-4.22586	2.3803e-05	0.000718241	60.1114	53.7944	1.13991	18.6008	71.7031	2.2609	25.5791	82.6236	171.201	24.5563	90.6075	209.799	1531.67	1414.71	537.125
Msrb3	3735.15	-1.68411	0.398546	-4.22563	2.38272e-05	0.000718241	2230.26	3432.99	2089.35	1820.52	3737.22	1149.31	2438.26	3326.21	3782.73	4334.81	2559.22	3576.3	7831.22	8977.64	4741.17
Klhdc8a	761.159	-1.86279	0.441046	-4.22357	2.40458e-05	0.000720264	662.089	608.641	918.707	314.101	253.006	326.164	894.572	1302.7	726.744	376.263	412.35	1373.24	989.429	1438.59	820.801
Npr2	908.076	-0.971831	0.230095	-4.22361	2.40425e-05	0.000720264	654.077	597.926	728.858	583.62	896.116	674.62	677.37	773.302	854.993	1157.58	881.526	915.067	1689.34	1522.76	1013.99
Sipa1l3	3173.3	1.08198	0.256169	4.22371	2.40315e-05	0.000720264	3637.47	3715.83	3752.24	4013.02	5680.32	3895.7	2685.04	1889.54	4186.95	2493.15	2728.08	2502.83	1940.77	2036.82	2441.82
Gm14680	599.81	0.943794	0.223514	4.22253	2.4158e-05	0.000720597	559.052	668.663	499.84	715.661	738.402	904.139	810.967	601.957	532.702	544.9	603.181	591.518	355.716	343.496	526.961
Grm7	39.147	3.36024	0.795784	4.22256	2.41546e-05	0.000720597	83.9624	41.6408	29.6489	42.6189	158.544	81.7363	35.8469	10.7613	43.4696	7.84181	16.8539	6.5632	1.60316	7.79624	18.3178
Abi3bp	1095.69	-5.46316	1.29454	-4.22016	2.44128e-05	0.000726465	128.942	118.397	41.4273	29.2015	255.548	32.0872	138.293	781.697	44.1098	634.533	109.43	144.752	10030.7	3788.04	158.157
Epb4.1l5	209.862	1.31461	0.311536	4.21976	2.44567e-05	0.000726465	274.587	209.467	171.613	411.719	233.803	277.387	289.232	192.507	177.993	207.87	173.951	156.986	158.455	96.9245	115.439
Hdac5	1947.51	-0.576379	0.136636	-4.21834	2.46102e-05	0.000729507	2031.67	2255.67	2351.49	1367.3	1692.97	1418.77	2112.84	1930.31	1996.58	1968.7	1583.17	1821.43	2398.55	2308.79	1974.39
Aig1	844.214	1.55332	0.368517	4.21506	2.49708e-05	0.000738156	1178.17	941.444	1025.79	750.013	1039.6	1401.32	907.019	930.493	556.313	1111.14	1159.02	576.14	469.073	197.969	419.709
Pgbd5	37.117	-2.61047	0.619495	-4.21388	2.51026e-05	0.000738156	16.2385	33.3996	11.4204	18.801	10.9068	18.4045	22.0983	23.5105	19.3543	12.2494	34.5451	42.1141	42.6963	170.769	80.2466
Pik3r3	486.961	-1.09035	0.258756	-4.21382	2.51091e-05	0.000738156	345.141	280.952	255.412	434.05	369.196	312.928	335.035	528.085	636.069	517.13	559.878	353.325	774.304	804.94	797.974
Suclg2	3215.6	0.962783	0.228447	4.21446	2.50376e-05	0.000738156	3893.98	3862.45	3478.89	3587.71	3772.6	4544.49	4233.54	3018.02	3129.39	2576.33	3500.18	2528.39	1904.13	1535.5	2668.42
Samhd1	5181.6	-0.6883	0.163426	-4.2117	2.53451e-05	0.000743562	3887.84	4952.59	4346.63	3345.66	4086.96	4873.63	4911.29	5135.44	5739.2	5740.55	4792.79	6082.61	6432.47	6546.03	6850.32
Agtr2	454.031	3.25796	0.774058	4.20893	2.5658e-05	0.000751193	564.491	554.611	363.648	197.546	3240.19	600.202	66.0365	212.07	218.06	111.61	197.345	60.3741	250.989	73.9741	99.3184
Trib3	550.33	-1.40678	0.334532	-4.20522	2.60825e-05	0.000762058	669.973	402.181	404.621	454.338	336.399	399.295	283.029	270.51	432.512	293.005	539.123	614.709	1375.53	994.507	785.222
Vamp5	85.8146	-1.93317	0.459937	-4.20311	2.6327e-05	0.000767629	74.5286	68.8532	40.76	20.5753	53.7976	39.9845	71.4771	76.1232	139.263	76.5436	69.8776	118.722	85.3164	182.302	169.095
Plscr1	1531.78	1.13915	0.271057	4.20262	2.63844e-05	0.000767732	1584.9	1237.96	1814.59	1956.18	1696.93	1945.28	1582.1	1770.64	2042.97	1874.73	1823.94	1103.82	594.106	797.222	1151.31
Zmynd15	44.7137	2.20684	0.525173	4.20211	2.64434e-05	0.000767881	96.0054	58.4438	52.0916	44.4727	73.4368	54.0654	27.255	39.6378	26.8349	53.15	81.1821	26.8305	5.83729	14.7005	16.7622
Abcg1	55.1948	3.92421	0.934068	4.2012	2.65502e-05	0.000769106	16.1266	42.104	77.4377	55.966	276.215	62.6861	47.6167	10.525	89.2119	21.6052	56.5877	45.4649	0.926525	11.3333	14.1154
Hdac7	3700.05	-0.772878	0.184002	-4.20037	2.66474e-05	0.000769106	3430.91	3159.3	3325.75	2915.77	2789.02	2621.7	3108.26	3960.25	4694.24	3587.43	3701.75	3977.66	3827.97	4515.41	5885.37
2020-09-11	12619.8	-0.979195	0.233117	-4.20045	2.6639e-05	0.000769106	8378.64	11517.8	7558.59	8541.85	9662.01	10827.9	9408.68	15752.7	15591.1	13639.1	9803.38	11383.2	18411.5	17941.5	20878.9
St5	1531.83	-0.887614	0.211388	-4.19897	2.68126e-05	0.000772312	1136.63	1187.69	1050.33	845.384	1145.52	1554.89	1494.55	2018.83	1782.03	1516.33	1446.14	1240.73	2374.39	2169.87	2014.2
Smpdl3a	35.8019	-2.57299	0.61362	-4.19313	2.75134e-05	0.000790899	28.8883	24.9615	13.2705	10.7004	15.1047	11.2802	15.8547	46.8325	17.2791	44.3652	45.2581	42.4904	75.5826	119.457	25.7027
Cisd3	445.061	1.40121	0.334316	4.19126	2.77408e-05	0.000795833	596.197	393.862	847.775	423.791	382.335	719.701	510.308	302.007	372.053	450.673	623.93	475.915	215.815	163.007	198.546
Atp6v0d1	2344.59	-0.734366	0.175377	-4.18735	2.82225e-05	0.000808025	1839.72	2149.22	2008.58	1826.66	1695.79	1869.88	2323.92	3559.43	2697.79	1985.66	1799.83	2441.28	2822.08	3202.31	2946.7
Smad7	997.002	-1.05554	0.252294	-4.18378	2.86704e-05	0.000819204	667.278	749.261	799.674	910.207	538.373	635.305	780.552	980.979	1383.44	1139.26	979.001	1059.02	1193.38	1736.99	1402.31
Obfc1	853.577	1.07038	0.255898	4.18284	2.87888e-05	0.000820942	1173.71	789.512	990.66	1036.1	1037.8	1099.53	1014.51	839.871	515.693	917.072	1121.55	756.877	583.379	461.171	466.208
Rnd3	5004.61	-1.47835	0.353757	-4.179	2.92797e-05	0.000833275	3413.59	3174.78	2231.84	3168.44	2696.18	4569.22	2459.77	5770.1	4256.08	6081.49	4051.49	4125.07	11968	11176.5	5926.57
Cadm1	149.889	3.53208	0.845835	4.17585	2.9687e-05	0.000842679	131.851	185.078	113.859	635.615	55.2142	459.581	256.668	57.4995	221.785	9.3269	7.14264	15.0466	2.75007	41.6078	55.3141
Pon3	255.926	-2.37979	0.569935	-4.17554	2.97284e-05	0.000842679	141.939	214.842	147.736	126.24	90.9725	47.5827	257.748	235.835	333.303	482.251	236.191	144.519	669.192	590.86	119.676
Dmrta2	60.6546	-3.98578	0.955468	-4.17155	3.02536e-05	0.000854811	31.6252	4.21205	27.9911	12.2255	7.49647	5.94829	50.1629	26.7536	13.7294	243.694	15.3432	63.7325	258.069	114.14	34.697
Fosl1	3733.83	0.896922	0.215018	4.17138	3.02763e-05	0.000854811	5164.09	3809.8	4822.46	5343.48	3766.98	4258.97	4122.77	2920.26	2867.62	3541.36	4226.11	3983.28	1964.91	2337.71	2877.68
Plekhg5	354.486	-2.01891	0.484121	-4.17026	3.04254e-05	0.000857324	204.537	181.154	225.503	167.987	241.582	137.57	250.101	507.075	314.304	410.654	247.226	216.243	1149.8	838.571	224.976
Cd99l2	1520.59	-0.498917	0.119677	-4.16885	3.06141e-05	0.000860939	1318.86	1529.12	1184.95	1313.74	1421.45	1296.64	1530	1566.7	1393.7	1641.17	1511.59	1402.42	1907.31	1853.01	1938.19
Lmod1	628.307	-2.42554	0.58204	-4.1673	3.08227e-05	0.000865097	358.079	469.643	374.88	87.4592	481.648	78.3191	575.829	602.986	1434.27	309.004	532.219	641.309	1163.8	1370.75	944.409
Irgm1	911.728	-1.84679	0.443318	-4.16583	3.10225e-05	0.000867292	1083.95	1093.52	481.763	345.568	352.874	404.305	813.271	1270.7	1067.62	715.224	466.554	1613.98	1011.76	1957.5	997.344
Kcnj15	112.092	-5.26486	1.26371	-4.16618	3.09746e-05	0.000867292	92.9814	437.917	11.4095	4.95379	2.84147	18.2778	3.66999	1.83899	5.625	1.97056	82.5066	14.0921	50.5669	70.3287	882.406
Pgbd1	49.0154	1.30251	0.312808	4.16392	3.12832e-05	0.000872608	44.8571	55.1605	51.9628	53.2017	51.8498	64.4493	53.664	44.2462	64.5311	65.7619	56.5303	60.2373	17.5184	25.4696	25.7916
Pla2g16	133.906	-2.19278	0.526663	-4.16354	3.13351e-05	0.000872608	96.3637	97.3843	122.27	73.6712	43.3863	41.0829	67.2262	76.9417	69.6254	406.102	103.5	89.7519	161.331	212.358	347.599
Megf9	384.351	-1.34069	0.322084	-4.16256	3.14704e-05	0.000874668	241.279	291.278	238.119	322.076	319.462	177.107	214.801	291.733	463.849	425.052	309.83	398.293	818.613	743.763	510.008
6030419C18Rik	293.115	-1.75924	0.423055	-4.15843	3.20449e-05	0.000888904	163.227	261.147	143.954	121.314	151.803	270.647	103.461	304.58	155.6	267.089	294.399	319.659	829.008	581.466	429.375
Zfpm1	149.24	-1.65768	0.399088	-4.15366	3.27201e-05	0.000905869	91.3188	47.6281	68.8237	108.192	96.3648	89.8057	76.808	164.754	88.409	154.927	91.0324	232.598	397.592	272.262	258.089
Trim34a	63.9896	-2.57534	0.620087	-4.15319	3.27869e-05	0.000905962	57.6656	80.7644	39.9446	21.2837	20.093	13.5264	55.1878	87.2449	70.4726	78.4398	15.6745	92.1976	96.1356	181.549	49.6653
Pter	615.755	0.832812	0.200633	4.15092	3.31139e-05	0.000913226	758.379	595.458	612.185	887.499	870.207	750.307	574.738	520.045	688.933	498.029	586.164	487.682	408.134	398.789	599.783
Rgmb	1521.56	1.81996	0.43873	4.14825	3.35025e-05	0.00092216	1551.68	2223.96	2719.13	1400.29	4271.11	1578.28	1302.15	653.406	1297.89	1094.67	1722.28	954.992	489.234	668.686	895.617
Hsdl1	673.09	0.682988	0.164689	4.14715	3.36643e-05	0.000924828	752.884	744.48	718.77	811.584	847.101	788.148	841.274	607.102	583.958	623.856	584.961	668.196	524.108	435.023	564.911
Kif6	12.0979	-3.29115	0.793967	-4.1452	3.39518e-05	0.000930933	7.14183	7.11697	12.9345	1.589	1.85802	1.67511	19.4239	19.1251	23.1982	12.0672	6.48126	18.2739	20.275	12.7359	17.5729
Foxp1	2486.3	-1.51783	0.366409	-4.14244	3.43632e-05	0.000938649	1232.3	1478.83	3100.74	1415.03	738.412	1717.89	2312.26	2392.45	3602.65	3041.67	2679.13	2497.56	4337.84	3080.72	3667.02
Npl	56.6011	1.86557	0.450357	4.14243	3.43649e-05	0.000938649	94.0714	90.5468	43.9173	39.7645	92.3044	97.6588	58.7202	76.1746	70.6643	31.6654	46.3777	44.5363	24.7011	20.7595	17.1547
Ephb4	2537.92	-0.742923	0.179389	-4.1414	3.45186e-05	0.000941045	1829.6	2233.14	1782.52	1705.74	2420.97	2194.39	2398.54	2999.67	3410.38	2394.77	2056.56	2063.62	3446.67	3799.68	3332.48
Tuba8	256.717	2.98477	0.721286	4.13813	3.50148e-05	0.000952749	691.674	468.59	171.945	101.566	328.908	499.656	438.926	179.044	64.9859	194.955	241.656	351.525	68.7518	32.3037	16.2642
Cap2	187.628	-2.47782	0.598911	-4.13721	3.51559e-05	0.000952952	80.2253	97.7039	96.0149	47.9432	53.7652	86.458	57.3353	108.844	470.074	183.01	302.505	182.78	357.089	221.542	469.133
Tef	1328.2	-1.03681	0.250585	-4.13756	3.51016e-05	0.000952952	828.66	1186.54	751.647	897.777	1199.96	990.288	1027.8	1361	1515.57	1611.21	1140.42	1076.49	2559.17	2027.79	1748.74
Cav1	18174.5	-1.55134	0.375032	-4.13654	3.52577e-05	0.000953898	12242.5	15948.3	12389.7	7593.13	16760.4	8103.22	13477.3	16749.2	21332.9	22121.1	11078.4	19695	31907.9	43886.6	19332.3
Ptchd1	35.65	2.81842	0.681451	4.13591	3.53545e-05	0.000954705	47.6738	48.526	29.4877	45.1824	132.392	66.8767	29.2503	24.1405	18.2988	4.90043	17.8935	36.1046	9.29615	18.9465	5.78058
Runx1t1	492.812	-1.81012	0.438132	-4.13144	3.60495e-05	0.000971633	180.148	271.99	240.151	159.542	403.213	355.5	244.714	345.409	637.894	647.815	330.124	354.698	1518.84	766.895	935.238
Fam78b	112.136	3.85954	0.934369	4.13064	3.6176e-05	0.000973203	141.601	223.599	232.082	78.2493	427.338	84.8044	105.276	54.1772	123.782	40.3647	93.3924	37.3807	36.0886	3.90612	0
Tmem62	225.261	-1.6792	0.406588	-4.12997	3.62809e-05	0.000974186	124.004	102.543	115.109	163.274	115.639	79.6858	138.746	203.114	361.054	382.82	170.967	278.471	439.713	431.208	272.571
Srd5a3	681.954	-0.599524	0.145303	-4.12602	3.69089e-05	0.000989187	599.426	568.867	599.85	541.003	602.705	463.121	845.751	775.645	776.068	686.498	728.052	607.656	863.111	876.7	694.853
Mamld1	224.255	-1.48889	0.361017	-4.12415	3.721e-05	0.000995384	175.736	168.337	184.231	90.7382	233.698	89.2357	126.691	151.423	229.635	210.715	237.792	305.546	386.648	404.875	368.521
Acot2	172.288	-1.41213	0.342467	-4.1234	3.73324e-05	0.000996788	139.763	148.475	187.94	142.944	82.4611	155.647	109.731	111.131	130.887	94.5532	137.13	130.453	499.198	303.655	210.351
Ddx25	78.3964	2.28568	0.554725	4.12039	3.78238e-05	0.0010064	131.602	64.2338	59.9808	158.931	74.9647	140.776	133.768	97.7537	68.6471	31.1928	108.362	28.8788	23.9137	26.9197	26.0228
Tll1	354.2	-2.6145	0.634538	-4.12033	3.78335e-05	0.0010064	219.336	414.887	302.903	93.1018	160.237	39.6552	229.913	245.928	752.372	121.847	240.697	697.075	521.119	481.325	792.61
Tmed2	12339.2	-0.442781	0.107487	-4.1194	3.79865e-05	0.00100859	10034.3	11233.4	12057.5	10248.9	10093.9	10732.1	14182.5	13250.9	14666.6	12900.7	12016	11432.5	13369.9	13290.7	15577.8
Gprin3	52.3584	-3.60898	0.876524	-4.11738	3.83204e-05	0.00101556	8.16134	13.6892	1.99936	9.40422	6.55941	26.7673	7.31543	27.7826	7.32236	104.301	26.8507	24.8955	254.083	226.126	40.1184
Plagl2	1521.55	0.899722	0.218595	4.11594	3.85604e-05	0.00102003	1454.79	1657.47	1069.68	1734.17	2103.74	2504.53	1677.36	1331.53	1694.24	1625.96	1290.78	1279.66	1115.99	952.978	1330.44
Eri3	1559.26	-0.703158	0.170946	-4.11334	3.89976e-05	0.00102968	1650.74	1302.3	1970.38	1172.59	1335.72	1199.5	1580.15	1522.49	1335.22	1375.2	1570.75	1339.24	2265.18	2004.28	1765.12
Acpp	330.062	3.74973	0.911877	4.1121	3.92071e-05	0.00103188	409.806	365.351	628.607	323.188	1899.63	204.714	42.1054	348.855	277.991	33.9398	126.549	109.901	16.6562	145.356	18.2881
Aspn	722.42	-4.15959	1.01158	-4.11199	3.92257e-05	0.00103188	43.6573	102.407	40.7908	64.0015	425.206	21.9014	38.7624	59.4908	432.226	138.79	138.11	195.194	2147.28	2869.03	4119.46
Tcf24	46.4366	2.54999	0.620508	4.10951	3.96501e-05	0.00104112	51.41	34.2194	61.5726	148.756	22.2992	102.694	27.7951	14.0794	19.5684	54.5806	71.1454	41.8192	20.9218	16.5805	9.10682
Prrg3	201.275	2.64093	0.642783	4.10858	3.98094e-05	0.00104339	198.002	226.775	79.942	198.192	242.005	84.2331	235.159	328.729	385.03	165.483	378.671	408.951	7.46999	62.4254	18.064
Nefm	36.055	3.60852	0.879	4.10526	4.03858e-05	0.00105655	119.107	22.3921	18.0529	79.9914	73.8816	45.8682	31.5221	84.3987	18.6518	5.92239	8.73939	15.9737	5.76515	1.09037	9.46762
Cxcl16	368.834	2.01454	0.491526	4.09853	4.15774e-05	0.00108573	605.838	287.843	301.201	493.192	490.727	503.872	463.136	368.915	413.04	214.854	795.359	225.981	65.6655	142.098	160.797
Enthd1	18.9089	2.96395	0.724798	4.08934	4.32603e-05	0.00112761	35.7059	13.6892	33.9891	44.1998	42.1676	20.819	13.5858	11.3188	19.2212	6.82343	15.3432	12.9457	2.98921	1.07679	9.75853
Ddit3	1140.03	-1.03535	0.253539	-4.08359	4.43461e-05	0.00115381	1067.56	1049.52	1378.94	743.846	769.146	916.029	917.622	905.995	1260.15	867.491	801.991	1443.78	1491.57	2009.61	1477.17
Blnk	49.1687	4.00368	0.981135	4.08066	4.49072e-05	0.00116204	124.269	10.7551	45.0868	145.652	8.11608	192.482	66.1935	39.1503	10.5469	38.5444	19.5321	15.6683	7.19579	7.72834	6.60961
Fam19a2	16.7953	7.86398	1.92695	4.08106	4.48312e-05	0.00116204	26.5244	13.6892	0	0	113.384	21.8104	12.5407	5.14493	8.23765	8.77298	25.8917	15.9331	0	0	0
Lingo3	36.2274	3.65916	0.896675	4.08081	4.48787e-05	0.00116204	44.8874	52.6506	18.9939	155.17	11.2447	130.862	12.5407	29.8406	8.23765	17.546	26.8507	10.954	1.99281	6.46074	15.1799
Fli1	37.7947	-3.43293	0.841447	-4.0798	4.50744e-05	0.00116426	9.81458	16.2089	40.3934	8.14264	7.21202	13.1434	18.0973	12.8692	103.907	8.6155	20.2964	4.38011	58.4743	117.06	128.306
Fam213a	412.49	2.52489	0.61912	4.07819	4.53883e-05	0.00116813	627.531	608.086	634.848	894.91	296.112	445.76	763.096	275.381	643.05	131.564	386.802	195.936	22.404	85.7572	176.116
Rundc3b	20.9149	5.51282	1.3517	4.07843	4.53402e-05	0.00116813	55.4439	5.55585	16.7025	59.2079	10.1628	42.0491	18.3797	44.6391	6.43898	18.8579	19.3951	14.1425	1.80107	0.946884	0
C1qtnf6	552.989	-2.36857	0.582401	-4.0669	4.76423e-05	0.00122394	271.159	380.536	170.503	119.166	279.852	293.848	245.17	1619.27	397.536	353.611	356.7	228.811	1372.1	1438.43	768.142
P4ha3	394.458	-2.35991	0.580341	-4.06643	4.77395e-05	0.00122423	168.857	417.729	188.161	53.5609	267.572	119.73	200.624	580.771	816.222	196.18	290.313	353.032	570.79	644.626	1048.7
Tmem100	22.2211	4.69445	1.15707	4.05718	4.96682e-05	0.0012714	85.6941	14.7422	9.99681	30.0935	28.1118	22.8018	13.5858	21.6087	38.4424	31.1928	23.0149	10.954	1.99281	0	1.08428
Npepps	3603.65	0.691268	0.170755	4.0483	5.15902e-05	0.00131823	4247.59	3374.35	3380.72	4681.27	4053.26	4580.01	3632.17	2995.42	4055.26	3529.25	3835.32	3443.71	2844.75	2239.75	3161.87
Tmem109	3796.36	-0.739712	0.182753	-4.04761	5.17428e-05	0.00131977	2939.5	3843.57	2687.06	2953.63	3285.93	3716.63	3180.96	3940.3	3276.33	3366.03	3350.92	3780.11	4603.9	5546.23	6474.34
Anxa9	85.2005	1.25382	0.309839	4.0467	5.19455e-05	0.00132021	111.692	84.4492	85.996	136.976	103.65	106.409	108.288	64.3759	52.7894	101.676	96.2674	79.7825	51.6232	43.1568	50.8765
Zfp941	84.6936	1.49456	0.369295	4.04706	5.18659e-05	0.00132021	116.435	96.4033	91.3285	126.123	122.441	107.792	53.391	117.559	63.5506	88.1627	60.4493	99.1192	27.3087	44.2679	56.0733
Commd3	1164.97	-0.733608	0.181352	-4.04522	5.22743e-05	0.0013262	1025.81	1003.09	1425.91	1031.17	718.354	922.254	1137.72	1176.93	1176.19	1072.11	1081.85	1260.71	1417.73	1634.3	1390.43
D030056L22Rik	1343.11	0.669519	0.165539	4.04447	5.24411e-05	0.00132807	1504.27	1536.39	1644.2	1486.58	1404.36	1772.39	1439.48	1196.39	1134	1212.54	1497.21	1386.73	896.434	868.645	1166.99
Chpf2	1473.36	-1.15633	0.286036	-4.04261	5.28597e-05	0.0013363	1114.03	1089.18	1012.85	1130.37	1104.24	958.734	1085.35	2120.72	1098.34	1757.99	1353.33	1157.53	2401.72	2996.6	1719.47
Morn4	351.346	0.918895	0.227359	4.04161	5.3085e-05	0.00133962	471.318	350.653	478.847	410.964	445.103	369.785	420.115	300.464	318.523	348.97	399.883	307.709	275.007	176.594	196.255
Eps8	5587.81	1.82831	0.452519	4.0403	5.33839e-05	0.00134478	6399.54	7113.53	4909.22	7424.59	9519.55	7051.85	10369.1	4822.29	6263.14	3766.64	4344.65	5076.27	1942.52	750.15	4064.12
Tmem170	180.704	0.78065	0.193263	4.03931	5.36094e-05	0.00134808	203.013	213.761	217.93	219.118	264.25	233.966	158.849	175.957	151.024	150.115	168.776	136.427	152.45	105.525	159.389
Twf2	1033.94	0.911587	0.225919	4.03501	5.46e-05	0.00137057	1030.56	1108.99	1362.22	1002.46	1331.53	1177.19	1483.77	1033.22	920.73	915.577	1307.37	968.697	567.808	700.262	598.735
Ern1	864.906	1.73263	0.430139	4.02806	5.62384e-05	0.00140922	1141.96	970.647	419.788	2349.54	765.091	1674.87	600.247	558.187	498.014	1230.45	808.985	514.678	520.05	429.915	491.166
Rnf183	14.9911	6.00632	1.49253	4.02424	5.71585e-05	0.00142726	20.1724	7.80818	52.7851	37.191	44.0063	17.1527	10.3323	3.1497	12.6076	2.23782	12.4752	2.28614	0	2.6615	0
Ugt1a6b	35.0722	4.9618	1.23287	4.02458	5.70768e-05	0.00142726	146.943	63.7104	84.677	38.8071	59.1328	34.9892	25.2917	14.1537	6.46077	11.7954	35.7787	0	0	4.3432	0
Trabd2b	191.433	-5.26881	1.31026	-4.02121	5.79007e-05	0.00144075	38.7664	10.5301	7.99745	32.9148	21.5523	4.9569	4.18024	234.609	5.49177	57.5118	93.0184	67.7158	704.457	1499.97	87.8268
Zfp703	1526.44	-1.37361	0.341569	-4.02147	5.78352e-05	0.00144075	1154.52	1332.38	1748.97	998.682	1143.06	960.277	1112	1390.94	709.442	1570.46	959.591	1778.5	3350.3	3175.94	1511.48
Adat1	302.974	0.639676	0.159157	4.01916	5.84053e-05	0.00145007	335.204	290.032	330.605	382.822	359.979	344.429	321.949	317.065	313.19	306.682	287.241	257.337	208.978	207.2	281.9
Wscd2	8.57732	-5.49774	1.36798	-4.01887	5.84788e-05	0.00145007	1.26811	1.30894	1.24264	1.16898	1.30078	0	1.29905	0	2.27549	1.06359	1.19202	1.23784	91.6541	16.1224	7.52576
Mgll	34.3137	-4.15042	1.03304	-4.01769	5.87724e-05	0.00145482	16.1231	11.7874	3.58315	3.37075	1.67935	14.2136	11.3535	51.6347	10.6622	12.447	15.4673	21.4159	12.7231	58.8579	269.387
Slc35f2	27.3471	6.65101	1.65577	4.01687	5.89763e-05	0.00145734	30.605	43.1735	2.99904	195.608	2.81118	15.8621	59.5685	11.3188	7.32236	4.87388	24.9328	8.96239	0	0	2.16856
Ezr	3787.29	1.58189	0.394209	4.01282	5.99967e-05	0.00147999	5521.63	4679.21	6004.57	6346.19	5090.55	5126.46	3410.27	3595.98	1381.85	2218.97	3951.18	3950.12	2936.51	1449.97	1145.82
Dchs2	52.6169	-2.94097	0.733929	-4.00716	6.14535e-05	0.0015133	18.363	17.9012	3.99872	24.451	23.4265	16.8535	27.1716	46.3044	13.7294	50.6883	14.3843	34.8537	287.961	170.133	39.0341
Ifi27	1713.6	-2.02668	0.506107	-4.00444	6.2164e-05	0.00152816	1764.36	1995.86	1363.9	646.829	854.457	290.415	2691.63	2256.96	1724.32	1195.07	805.412	2815.71	2849.64	3419.92	1029.51
Cdkn2c	978.235	-1.41307	0.353073	-4.00222	6.27521e-05	0.00153996	665.882	596.577	739.124	607.537	778.35	603.198	913.491	1277.82	573.033	1009.28	914.319	698.291	2671.52	1653.46	971.647
Postn	8707.78	-5.25582	1.31356	-4.00121	6.30182e-05	0.00154384	280.626	810.018	198.472	36.1076	2564.33	52.324	2656.34	1609.1	17562.9	610.473	2315.67	553.387	17618.8	18083.2	65665.1
Grina	3721.49	0.710338	0.177653	3.99845	6.37591e-05	0.00155931	5040.65	4697.49	3673.83	4448.2	4107.13	4856.77	3544.85	2893.51	3111.09	3169.97	4370.91	3710.43	2357.49	3103.31	2736.73
Arrb2	674.32	0.966629	0.24183	3.99715	6.41107e-05	0.00156325	1021.27	541.536	901.711	776.053	720.797	928.054	780.817	523.543	616.953	654.534	717.148	690.552	371.715	467.518	402.597
Bex2	31.3498	3.72729	0.932545	3.9969	6.41784e-05	0.00156325	93.8554	32.6434	101.967	70.5316	12.1818	29.7414	56.4333	16.4638	14.6447	3.8991	14.3843	14.9373	0.996404	3.23037	4.33713
Raet1d	264.636	1.71003	0.427867	3.99664	6.4249e-05	0.00156325	345.571	363.424	387.481	317.796	275.742	262.169	435.604	206.849	550.803	148.796	311.272	102.668	120.418	76.2962	64.6455
Tmem140	85.0015	-2.26257	0.566327	-3.99517	6.46466e-05	0.00157024	58.6454	80.9181	106.027	41.215	40.3084	27.1352	91.6158	105.079	37.8313	57.7406	46.0672	60.9011	223.693	253.942	43.9026
Dnajc3	2610.21	-0.588927	0.147463	-3.99373	6.50414e-05	0.00157714	2095.42	2330.32	1904.39	2622.84	2219.89	1915.35	2406.78	2525.13	2659.85	3049.1	2716.71	2541.34	3160.59	3750.46	3255.01
Mgst2	47.1763	3.85053	0.96424	3.99333	6.51519e-05	0.00157714	110.654	36.4575	38.8655	117.962	19.4511	90.0998	35.3948	99.8909	4.0719	26.3732	80.2616	32.158	1.91938	6.08085	8.00253
Apbb2	2268.79	-0.669255	0.167628	-3.9925	6.538e-05	0.00157998	1933.98	1807.38	1578.52	2154.9	2366.98	2038.2	2056.41	2170.35	2405.32	1683.03	2091.45	1312.69	3509.1	3531.99	3391.5
Deptor	561.55	-1.99275	0.499216	-3.99175	6.55863e-05	0.00158228	145.884	329.593	174.944	264.259	281.118	266.681	274.851	1556.86	451.24	477.64	462.215	505.877	805.094	1193.08	1233.91
Gm10849	5.62176	5.91533	1.48408	3.98586	6.72369e-05	0.00161936	7.14118	15.7952	3.99872	9.40422	20.6153	4.9569	2.09012	5.14493	6.40706	1.94955	3.83581	2.98746	0	0	0
Atg3	1502.27	-0.692153	0.173723	-3.98423	6.76988e-05	0.00162774	1356.95	1411.41	1696.67	1255.13	1166.26	1018.12	1542.91	1242.21	1522.18	1426.14	1597.68	1741.39	2088.49	1975.85	1492.74
Col1a2	78792.7	-1.60156	0.402084	-3.98316	6.80059e-05	0.00163237	59015.6	60848.7	30286	39066.6	62555.5	51548.2	47986.5	120403	91854.7	26777.9	70871.1	55846.4	169068	174508	121254
Mrpl38	1689.36	0.870149	0.218549	3.98148	6.84882e-05	0.00164118	2339.04	1729.36	2436.59	2094.63	1640.49	2254.86	1788.35	1426.57	1782.04	1208.36	1617.6	1745.17	889.386	1100.16	1287.83
Ccdc64	87.4564	-1.3715	0.344515	-3.98095	6.86407e-05	0.00164208	105.326	77.7555	66.2186	66.5144	31.6322	46.2898	57.8763	122.851	96.0363	87.754	90.664	92.6882	122.265	134.393	113.581
Papss1	2122.87	0.477296	0.119937	3.97956	6.90433e-05	0.00164894	2515.73	2808.38	2388.24	2185.54	2333.28	2349.57	2173.73	2045.62	2144.54	1971	2061.75	1930.9	1432.83	1605.49	1896.41
Atp6ap1	7746.27	-0.590589	0.148495	-3.97715	6.97462e-05	0.00166295	6146.78	7497.66	5436.9	7626.29	7324.57	6589.71	6762.93	7813.57	6769.18	7242.28	6853.69	7694.13	10775.3	12124	9537
Ttc9	211.362	3.62733	0.912303	3.97601	7.0081e-05	0.00166814	195.872	124.255	235.925	338.552	192.097	318.233	1164.2	112.159	33.8659	95.528	118.91	172.277	44.8382	19.3822	4.33713
Arhgap22	2107.59	1.74634	0.439429	3.97411	7.06435e-05	0.00167851	3030.01	1636.58	2112.01	3301.73	3833.63	2664.17	2505.64	1738.99	1186.58	2376.68	2724.98	1581.88	1379.72	1197.63	343.595
Cd276	1444.07	-1.10885	0.279072	-3.97334	7.08706e-05	0.00167851	910.499	1173.96	922.196	698.318	1423.59	951.449	1690.36	2146.41	1674.5	1460.73	979.831	1001.02	2797.7	1936.54	1893.97
Fam19a1	70.2043	2.83629	0.713935	3.97275	7.10464e-05	0.00167851	206.892	152.904	96.8324	66.4887	181.204	88.8303	18.8633	37.3175	13.5157	20.1082	100.27	22.2547	13.0025	28.0567	6.52374
Nrbp1	2449.91	-0.582192	0.146543	-3.97284	7.10215e-05	0.00167851	2105.63	2126.03	2105.33	1984.29	2066.21	2091.81	2517.55	2919.23	2353.22	2639.69	2315.87	2328.23	3085.86	3615.86	2493.85
Tnfrsf11b	375.612	-3.47377	0.874441	-3.97256	7.11054e-05	0.00167851	85.6941	204.284	55.9821	14.1063	78.7129	210.173	102.416	650.319	410.967	203.728	33.5634	219.081	669.583	2175.12	520.455
Per3	152.457	-1.31167	0.33027	-3.97151	7.14173e-05	0.00168309	108.396	87.3229	86.6186	99.5171	146.851	75.6104	90.9494	151.776	147.003	237.203	128.685	127.918	274.15	253.918	270.935
Plcl2	186.1	1.98617	0.500707	3.96673	7.28642e-05	0.00171435	158.126	134.786	285.909	471.151	278.306	256.768	292.617	158.464	165.668	70.1838	191.791	73.6908	78.7159	46.302	129.03
Ccnd2	12676.6	-0.630504	0.15902	-3.96493	7.34164e-05	0.00172166	11098.4	10564.9	10002.8	10847.8	10738.7	8615.1	14276.6	17421.8	14373.8	10645.5	13945.1	10862.4	13652.7	16122.8	16980.9
Galnt7	782.436	1.22311	0.308458	3.96525	7.33204e-05	0.00172166	584.305	974.271	602.497	1154.17	1817.5	743.777	661.174	601.653	808.632	823.341	676.045	697.79	479.343	501.475	610.555
Id4	277.249	-2.30246	0.581346	-3.96058	7.47682e-05	0.00175049	177.509	219.027	75.9757	200.31	101.202	56.5087	188.111	345.739	386.254	85.7803	184.119	371.441	380.626	874.353	511.781
Tgfb2	526.519	-2.59989	0.656868	-3.958	7.55788e-05	0.00176656	411.174	232.525	106.51	152.215	269.336	182.245	136.457	1095.03	373.738	208.572	613.574	457.489	925.117	1985.41	748.386
Clcn4-2	1022.19	-0.886472	0.224053	-3.95652	7.60484e-05	0.00177173	824.296	921.386	518.834	836.035	908.947	832.76	713.777	1105.13	1048.93	1016.69	896.621	944.038	1597.23	1729.32	1438.84
Gatad2a	5385.63	0.514579	0.130047	3.95687	7.59395e-05	0.00177173	5513.91	5049.5	4780.35	6168.65	7354.8	6329.07	5453.98	5624.31	5094.14	4521.87	5745.66	5251	4272.21	4520.48	5104.48
P2ry2	130.83	1.6752	0.423558	3.95506	7.65148e-05	0.00177969	194.817	179.872	109.448	173.293	198.417	194.742	178.333	50.1714	128.362	137.685	96.1163	143.884	79.8204	53.4921	44.0023
Samd14	583.671	-1.17247	0.29671	-3.95157	7.76387e-05	0.00180289	616.567	341.068	395.035	305.206	492.69	385.093	593.696	811.556	638.527	503.503	626.171	378.983	773.573	1143.05	750.34
Pou2f2	57.0871	2.05374	0.520103	3.94872	7.85692e-05	0.00182153	46.1805	49.1467	38.2594	71.4063	77.5146	141.297	84.6549	40.0481	51.0692	89.2295	70.1201	27.306	15.1789	18.9611	35.934
Cnppd1	1135.64	-0.555289	0.140647	-3.94811	7.87705e-05	0.00182323	926.655	1016.74	1081.77	1019.07	908.543	968.552	1008.11	1283.03	1121.8	1169.82	1099.52	1174.86	1317.55	1649.82	1288.74
Grin3a	154.677	-4.33856	1.09952	-3.94585	7.95178e-05	0.00183754	84.7444	43.7286	89.8837	28.5465	19.2688	10.6783	178.046	113.03	36.6934	433.865	28.8695	68.9444	1095.29	71.5737	16.9875
Atg9b	29.0443	3.54686	0.899674	3.94238	8.06758e-05	0.00185528	39.9145	8.75728	53.7075	49.6172	63.7984	22.5866	113.907	11.8807	24.7115	14.0263	12.9451	8.35865	2.38958	5.16473	3.9005
Erbb2	1118.33	-1.18447	0.300401	-3.94296	8.04831e-05	0.00185528	987.517	1061.16	695.378	551.754	801.633	828.28	867.689	1703.07	942.754	1266.36	1076.76	1035.06	1973.09	1798.09	1186.36
Prrc1	1223.54	-1.04614	0.265343	-3.94257	8.06117e-05	0.00185528	885.506	908.75	979.687	781.491	1110.41	822.846	1167.33	1540.39	1101.1	1456.31	1196.77	796.657	2262.83	2010.37	1332.58
Pon2	799.11	-0.982298	0.249245	-3.9411	8.11087e-05	0.00186223	739.267	698.571	821.021	540.141	634.011	360.889	745.37	615.112	700.298	1128.64	1058.98	910.981	1009.06	1310.24	714.057
Mdfic	1180.16	-0.952819	0.241853	-3.93966	8.15963e-05	0.00187042	876.482	1342.79	999.225	703.397	1177.54	780.845	827.103	948.424	1258.77	1357	1163.41	1115.84	1845.31	1582.87	1723.33
Clec1a	9.81985	7.45282	1.8923	3.93849	8.1996e-05	0.00187656	3.0605	0	0.999681	4.70211	89.0206	7.93105	11.4957	2.05797	16.4753	2.92433	8.63058	0	0	0	0
Cyb5b	9446.08	0.578101	0.146823	3.9374	8.23689e-05	0.00188208	9973.16	10609.1	8231.37	11499.5	11100.4	10997.4	10122.5	9805.21	9947.42	7983.41	9829.27	9086.87	6750.63	6804.23	8950.74
Gm21967	92.5957	-3.34558	0.850534	-3.93351	8.37147e-05	0.00190391	174.449	109.513	136.956	0	14.0559	11.8966	123.317	64.8261	61.3247	38.0162	242.615	148.377	57.7914	31.2269	174.569
Pmp22	1770.17	-1.88497	0.479213	-3.93348	8.37251e-05	0.00190391	713.355	1294.15	580.363	682.92	1431.6	669.491	1009.1	3146.46	2271.28	1675.76	1965.73	829.437	2794.91	2567.24	4920.8
Tgfb3	1850.47	-1.74778	0.444308	-3.93372	8.3642e-05	0.00190391	1276.23	1363.65	534.829	1039.17	1251.91	1314.57	1221.68	2778.26	756.949	1242.84	1248.56	1619.21	4048.39	5423.79	2636.97
Ddx58	1352.32	-2.18116	0.555445	-3.92688	8.60564e-05	0.0019521	1188.03	1957.41	610.434	342.287	514.629	584.976	1435.15	1701.84	1519.52	1567.68	334.163	1990.78	2227.39	3235.64	1074.9
Scarb2	1568.74	-1.24543	0.317169	-3.9267	8.61181e-05	0.0019521	906.929	1078.28	1100.65	892.46	1501.17	703.88	1386.8	1874.81	2855.72	1580.11	1121.02	1185.03	2855.69	2548.76	1939.78
Wdr55	1379.12	0.76368	0.194553	3.92531	8.66191e-05	0.00196034	1631.25	1385.76	1863.4	1437.9	1471.18	1680.39	1765.11	1327.39	1127.64	1296.45	1539.12	1457.88	816.054	838.819	1048.5
Ryk	9158.04	-0.412448	0.105107	-3.92407	8.70651e-05	0.00196731	8399.5	8307.51	8293.04	8039.72	8065.49	8075.59	9109.33	9779.41	9499.08	9258.96	9480.22	8878.06	9251.24	10649.5	12284
Kansl2-ps	15.225	18.4939	4.71595	3.92157	8.79754e-05	0.00198474	7.14118	0	0	36.6765	0	11.8966	0	0	142.786	0	0	29.8746	0	0	0
Bach2	238.859	-1.98971	0.508779	-3.91075	9.20096e-05	0.00207247	293.706	242.333	167.899	89.7986	78.4664	100.471	109.387	361.16	530.288	216.75	230.658	94.5029	516.878	241.569	309.019
Parm1	19.1259	-5.65111	1.44583	-3.90855	9.28523e-05	0.00208815	5.10084	1.05301	0.999681	0.940422	0	1.98276	11.4957	98.7827	5.49177	1.94955	10.5485	2.98746	4.98202	54.9163	85.6582
Ttc39c	821.05	1.73028	0.442737	3.90814	9.30096e-05	0.0020884	1073.92	760.582	1653.93	727.106	1105.84	877.897	1080.81	472.193	1114.54	689.36	1373.18	569.136	166.76	256.524	393.972
App	2422.76	-1.3513	0.345899	-3.90662	9.35955e-05	0.00209167	2610.61	1816.45	3168.99	1087.13	1173.2	1889.57	3434.07	1926.26	1519.39	1842.33	3078.24	2207.74	3873.02	3972.28	2742.15
Cdr2l	891.256	0.661348	0.169285	3.90671	9.35629e-05	0.00209167	1108.92	897.166	1147.63	1130.39	970.793	1075.65	748.264	713.087	940.923	823.685	1031.83	771.761	649.655	710.681	648.4
Stx18	709.071	-0.78437	0.200774	-3.90673	9.35527e-05	0.00209167	558.442	577.267	636.788	623.136	513.15	484.938	705.667	931.612	676.593	842.311	582.26	712.62	1035.25	987.023	769.006
Nceh1	680.003	0.975333	0.249739	3.90542	9.40629e-05	0.00209882	789.756	937.041	584.285	929.414	1154.86	634.869	705.971	544.79	694.589	562.919	552.57	725.431	446.79	432.853	503.902
AW011738	30.511	-3.09846	0.793939	-3.90264	9.51503e-05	0.00211977	12.242	50.5446	11.9962	6.58295	8.43353	7.93105	34.487	45.2754	26.5435	19.4955	4.79477	32.8621	75.7267	99.0646	21.6856
Nebl	30.2933	-3.37255	0.864709	-3.90021	9.61095e-05	0.0021378	30.726	33.897	36.9637	8.39656	3.57243	4.25197	27.2299	28.9186	22.7881	22.7705	7.7688	61.6423	30.1839	126.108	9.18215
Smad6	440.767	-2.03265	0.52155	-3.89732	9.72631e-05	0.00216009	161.187	161.111	193.938	289.65	111.51	317.242	316.653	836.566	200.45	456.195	294.399	333.6	945.587	1485.97	507.444
Loxl1	8487.41	-1.13349	0.290873	-3.89688	9.74414e-05	0.00216068	5993.49	6278.06	5016.4	6028.1	5783.53	6438.03	11374.4	10639.7	4967.3	8999.13	9176.22	6579.39	17287.6	12250.6	10499.1
Setd6	457.636	0.993384	0.25503	3.89517	9.81293e-05	0.00217256	587.119	421.732	538.053	560.87	524.539	578.771	631.653	397.903	436.97	437.548	559.356	354.043	305.761	207.144	323.085
Abhd5	1553.62	0.622683	0.159918	3.89377	9.86993e-05	0.00218179	1334.45	1642.3	1697.62	2036.19	2052.81	1605.67	1836.93	1526.15	1513.78	1292.01	1455.19	1612.82	1318.41	1240.76	1139.24
Foxj2	1083.24	-0.826252	0.212339	-3.8912	9.97507e-05	0.00219822	828.272	986.081	697.821	653.45	1042.97	908.286	980.819	1233.99	1082.08	1224.99	963.27	1028.91	1699.6	1625.89	1292.23
Rnf182	14.9871	3.04344	0.782087	3.89144	9.96524e-05	0.00219822	10.8627	10.3499	31.8481	21.5677	29.853	42.1114	22.1958	10.9272	11.9951	3.19365	6.28363	12.2348	1.63226	2.64591	7.10486
Phlda2	19.7522	3.91218	1.00704	3.88481	0.00010241	0.00225333	42.8471	4.21205	25.9917	95.923	14.9929	48.5777	8.36049	7.2029	8.23765	0.974776	14.3843	13.9415	1.99281	4.30716	4.33713
Dusp2	24.3968	3.67508	0.946675	3.8821	0.00010356	0.00227513	50.8136	14.5014	11.6855	50.7975	16.0089	109.503	15.9747	25.571	2.46902	16.7474	15.5997	22.3853	5.16715	6.77752	1.94991
Mpc1	921.417	-0.787118	0.202974	-3.87792	0.000105352	0.00231094	613.425	882.78	774.527	690.623	821.971	618.708	885.622	1092	913.413	1136.34	908.577	804.81	1347.06	1300.08	1031.3
Stat1	1364.95	-2.24681	0.579447	-3.8775	0.000105535	0.00231139	1048.05	1479.78	499.913	397.493	817.399	474.606	838.348	2382.99	1237.79	1353.04	367.662	1560.45	2566.96	4212.5	1237.32
Ppp1r14a	49.8311	-2.52238	0.650762	-3.87605	0.000106168	0.00231459	31.6252	94.7711	60.9805	9.40422	14.9929	8.92243	44.9376	26.7536	38.4424	24.3694	69.0446	131.448	31.8849	83.9896	75.8997
Spink2	74.7937	2.28065	0.588369	3.87623	0.000106089	0.00231459	115.17	118.926	148.872	117.529	135.8	55.4872	99.227	84.3311	37.5067	28.2532	74.7578	42.7971	40.4164	8.60965	14.2225
Spry4	1499.53	1.55513	0.40118	3.8764	0.000106015	0.00231459	1488.43	2321.89	1241.6	3189.91	2358.58	1457.33	1489.21	877.725	1539.53	1152.18	1667.62	1324.44	434.432	707.451	1242.59
Ilvbl	235.212	-1.44763	0.373754	-3.8732	0.000107415	0.00233819	206.074	155.846	152.951	190.906	141.496	136.811	253.95	218.145	202.28	267.089	159.186	163.315	329.81	708.528	241.795
Pink1	306.373	-1.03218	0.266592	-3.87175	0.000108056	0.00234857	275.928	252.534	288.235	241.944	204.254	199.605	317.675	291.446	262.867	323.205	356.77	260.619	544.283	519.313	256.917
Slc16a10	299.345	1.6853	0.435587	3.86903	0.000109271	0.00237137	431.531	349.6	310.901	492.781	611.899	282.544	274.851	148.174	430.189	190.081	353.854	182.235	114.586	107.679	209.266
Fam110b	275.674	-0.752441	0.194537	-3.86786	0.000109793	0.00237907	229.079	306.535	218.567	247.269	236.932	203.755	228.746	294.978	327.719	242.293	214.92	226.256	416.108	358.11	383.838
Gpr98	37.4283	1.83964	0.475947	3.86521	0.000110992	0.00239777	73.1303	33.1679	47.9225	89.4318	46.2612	47.4083	30.3124	28.1652	26.6166	28.2971	36.8421	22.1211	13.1246	25.5965	13.0267
Rab39b	258.256	-1.29614	0.335332	-3.86524	0.000110981	0.00239777	186.691	174.8	260.917	163.633	204.279	129.871	202.742	285.029	259.944	299.256	272.343	212.11	606.81	376.876	238.542
Zswim4	1376.07	0.971071	0.251262	3.86477	0.000111192	0.00239846	1388.45	1540.56	1256.6	1548.87	2889.89	1443.45	1161.06	1127.77	1350.06	1246.74	1530.49	1156.15	923.666	956.189	1121.15
Ereg	2678.47	1.29129	0.334671	3.85838	0.00011414	0.00245832	2501.45	3034.78	1870.4	4559.16	2390.44	2916.64	2628.33	1391.19	2323.02	5832.08	3794.58	2903.81	1420.87	1496.74	1113.56
Eva1b	1444.63	-0.817039	0.211885	-3.85604	0.000115238	0.00247822	1193.72	1644.91	2109.04	1052.59	995.245	1101.6	1407.6	1287.79	1377.26	1229.92	1139.66	1581.46	1661.04	2159.47	1728.12
Lingo1	75.654	2.38527	0.618772	3.85484	0.000115803	0.00248613	130.423	76.758	73.9915	138.156	94.5771	269.05	44.5351	24.2329	27.7141	19.6768	108.616	31.2692	41.3441	36.2267	18.2394
Ube2h	3014.45	-0.731113	0.189677	-3.85453	0.000115954	0.00248613	2439.92	2569.09	2261.07	2151.99	2903.54	2361.26	2714.19	3440.01	3442.69	3224.31	2871.8	2525.87	4344.11	4784.41	3182.51
Tsc22d4	1674.71	-0.652412	0.169481	-3.84946	0.000118376	0.00253425	1540.73	1193.37	1582.17	1320.7	1309.83	1590.65	1723.49	1979.39	1593.06	1712.65	1456.81	1483.69	2113.47	2574.24	1946.35
Srxn1	2009.17	0.789704	0.205264	3.84725	0.000119449	0.00255338	2522.42	2522.67	2247.97	2697.42	2951.99	1989.33	2136.02	1739.23	1393.85	1652	2125.62	1740.3	1696.61	1405.87	1316.3
Acsl4	2182.9	0.919312	0.239016	3.84624	0.000119945	0.00256015	2271.81	2787.24	2084.8	2638.54	3004.7	2772.64	1774.54	1490.3	2698.68	2737.87	2288.66	1743.62	1410.99	1358.52	1680.61
Fgf9	12.481	-3.56811	0.928162	-3.84428	0.000120909	0.00257302	3.7233	1.55951	0.608088	0.572042	4.55966	2.41216	17.6847	6.37415	25.3033	6.69964	22.4116	8.08858	25.234	16.2755	45.7094
Tmsb15b2	68.2363	2.65019	0.689351	3.84448	0.000120809	0.00257302	90.7949	83.188	253.919	70.5316	183.663	37.6725	45.9827	52.4783	41.1883	16.5712	67.1267	33.8579	10.9604	24.7662	10.8428
Tmem165	2548.56	-0.470885	0.12257	-3.84176	0.000122157	0.0025957	1945.57	2205.56	2219.23	2019.67	2485.89	2250.79	2992.79	2907.11	2518.63	2524.88	2509.97	2286.67	3369.39	2927.86	3064.42
Fam13c	179.726	-2.89733	0.754744	-3.83882	0.000123626	0.002623	30.8999	44.6526	61.6408	72.1606	132.817	22.6662	33.6069	279.658	50.045	123.425	75.0766	72.7402	802.54	701.215	192.743
Limd2	3459.88	0.799173	0.208308	3.8365	0.000124802	0.00264011	4197.94	3973	3867.21	4445.03	3561.19	4618.67	4464.62	3097.67	3830.49	2590.48	3331.6	2664.46	1944.91	2207.81	3103.11
Lrrtm3	49.1862	-5.52918	1.44111	-3.83675	0.000124675	0.00264011	10.7174	14.3457	19.1191	1.87189	8.99984	1.97332	3.86575	94.757	3.39546	40.5669	4.50161	16.7546	296.146	220.453	0.324874
Dach1	133.388	3.1515	0.821726	3.83522	0.000125453	0.00264994	154.532	165.193	224.693	154.509	524.223	164.5	62.8173	49.4808	75.7649	189.208	47.0738	93.7768	2.99463	81.1925	10.8625
A630033H20Rik	125.604	2.76302	0.72097	3.83236	0.000126918	0.00267692	196.058	187.827	51.7271	122.042	213.609	202.429	103.376	49.2982	252.477	77.2638	113.133	235.261	6.43534	29.3948	43.721
Mapkapk2	5918.14	-0.452466	0.118078	-3.83194	0.000127139	0.00267762	5490.62	5469.34	5528.2	5766.64	4403.31	5369.74	6644.63	6297.37	5645.42	5768.48	5485.96	5637.02	7439.51	6578.46	7247.42
Aldh1l2	1630.76	-2.02155	0.527669	-3.8311	0.000127573	0.0026828	871.864	1228.01	346.556	1104.04	1393.35	647.767	419.372	1305.08	1128.92	1222.93	1142.1	881.214	7407.23	3091.36	2271.58
Ctdspl	920.769	-1.07336	0.28044	-3.82741	0.000129501	0.00271933	593.344	691.884	566.137	650.795	794.812	774.868	747.157	1086.55	563.388	1211.64	726.36	732.126	1804.98	1676.92	1190.59
Tmem120b	125.591	-0.940039	0.245835	-3.82386	0.000131377	0.00275468	86.3118	99.0347	59.4231	110.846	88.8057	76.3573	132.026	150.988	176.411	112.326	139.096	122.222	161.596	185.741	182.686
Man2b2	697.335	-1.60717	0.42039	-3.82304	0.000131817	0.00275984	588.779	529.037	320.738	460.323	285.816	399.848	585.109	1289.72	582.845	890.537	365.246	670.535	1375.43	1412.61	703.448
2510039O18Rik	1580.02	-0.483226	0.126417	-3.82248	0.000132118	0.00276208	1512.91	1686.93	1711.45	1357.97	1331.56	1232.29	1467.27	1472.48	1588.95	1726.33	1495.97	1634.14	1905.12	2030.83	1546.19
Kdelc2	1020.82	-0.523192	0.136912	-3.82137	0.000132711	0.00276637	794.711	961.4	846.73	884.937	963.296	815.906	1086.86	1332.54	1049.84	986.473	900.457	860.389	1352.12	1217.85	1258.85
Rin3	332.943	-2.25906	0.59115	-3.82146	0.000132662	0.00276637	152.424	239.414	280.257	273.936	34.459	81.7613	189.604	468.451	415.008	306.101	187.119	491.902	567.734	761.27	544.7
Arhgef10l	745.22	-1.37984	0.361254	-3.81959	0.000133673	0.00278236	535.418	397.569	317.481	541.536	450.6	569.663	771.361	997.357	460.076	847.075	770.495	456.303	1843.12	1403	817.253
Ap3d1	5155.59	-0.651344	0.170546	-3.81917	0.0001339	0.00278301	4687.67	5198.72	3808.78	4591.14	4490.38	4058.71	4431.06	5181.97	5590.62	5364.19	3892.39	5399.34	6723.73	7408.31	6506.77
Slc38a1	4295.73	0.904764	0.236984	3.81782	0.000134636	0.00279423	4690	3772.31	3412.23	6183.5	5469.6	5102.9	4256.7	4227.71	5822.96	5111.14	4186.8	3250.61	3684.99	2225.18	3039.35
Nr1d1	856.776	-0.943335	0.247269	-3.81501	0.000136175	0.00282207	704.568	656.96	629.532	685.412	604.908	678.41	678.773	595.887	1139.32	780.719	884.345	1026.69	969.688	1361.71	1454.73
Ramp3	329.681	3.07012	0.804839	3.81458	0.000136416	0.00282296	1050.09	705.633	259.523	589.564	417.343	204.78	484.555	321.87	57.7435	67.5944	366.344	275.613	9.2447	56.975	78.3341
Lyrm5	222.418	-0.682801	0.179041	-3.81365	0.00013693	0.0028295	197.609	195.016	222.611	180.063	170.705	160.512	241.552	280.261	209.592	238.153	182.452	237.19	292.314	275.923	252.321
Dysf	660.758	-3.18366	0.834904	-3.81321	0.000137176	0.00283047	300.481	414.973	283.828	132.941	226.111	133.062	475.877	884.578	88.7998	881.219	388.469	1224.51	1771.82	2624.27	80.4214
Arl1	5360.41	-0.635965	0.16683	-3.81206	0.000137816	0.0028374	4516.67	5503.72	4781.55	4406.18	4995.55	3524.4	4808.6	6201.72	5300.24	6214.17	5281.35	4785.02	6720.16	6449.91	6916.93
Tmed4	1609.5	0.601656	0.157837	3.81189	0.00013791	0.0028374	1896.83	1671.86	1783.54	1986.1	1679.57	1827.64	1831.31	1591.73	1586.85	1362.7	1895.2	1408.75	1069.58	1320.87	1229.92
Radil	167.662	-1.51332	0.397112	-3.81081	0.000138511	0.00284567	122.907	121.908	92.3072	95.9359	138.44	114.351	93.0585	172.677	275.003	115.994	58.5117	117.475	291.395	272.921	432.042
Six2	108.559	4.93591	1.29571	3.80942	0.000139294	0.00285762	26.2207	0	14.8235	22.3117	709.078	587.039	45.5616	9.15486	54.289	2.89085	8.53178	105.333	2.95499	22.3537	17.8379
Rgs16	3109.82	2.55757	0.671572	3.80834	0.000139903	0.002866	3454.29	4146.76	3891.76	3428.78	7492.72	3255.69	3335.83	1512.61	5456.07	1829.65	3244.14	3190.61	136.507	422.102	1849.78
Gdf6	55.3152	-4.04473	1.06279	-3.80578	0.000141358	0.00289166	1.02017	8.4241	33.9891	13.1659	11.2447	2.97414	29.2617	103.928	132.718	20.4703	0.958953	18.9206	105.619	302.578	44.4555
Bnc1	151.738	3.6856	0.968995	3.80353	0.00014265	0.00290837	213.215	667.61	471.849	110.029	313.915	43.6208	75.2444	29.8406	116.242	103.326	73.8394	20.9122	4.98202	0	31.4442
Herc6	280.865	-1.11297	0.292602	-3.80369	0.000142554	0.00290837	245.86	313.798	248.921	114.731	183.663	163.578	338.6	268.565	390.831	442.548	207.134	295.759	365.68	299.348	333.959
Mapk12	279.721	1.22207	0.32132	3.80329	0.000142787	0.00290837	367.26	185.33	474.848	343.254	322.348	299.397	484.908	370.435	310.285	224.198	211.929	188.21	172.378	108.756	132.282
9130023H24Rik	171.649	-0.868477	0.228379	-3.80278	0.000143081	0.00291019	166.287	150.581	138.956	151.408	147.118	132.845	147.354	146.116	159.261	154.015	127.541	165.306	234.155	351.033	202.761
Pitpnm2	848.185	-1.17155	0.308228	-3.80093	0.000144154	0.00292786	562.926	536.614	497.052	711.083	480.755	688.099	962.648	582.862	1080.87	1056.95	526.787	802.232	1287.76	1108.4	1837.74
Krt8	5.67645	6.2252	1.63921	3.79768	0.000146058	0.0029623	3.0605	4.21205	3.99872	9.40422	11.2447	22.8018	4.18024	17.4928	0	2.92433	3.83581	1.99164	0	0	0
Neurl3	192.557	2.77833	0.732072	3.79516	0.000147549	0.00298828	205.386	152.69	60.315	314.609	290.433	380.384	470.401	327.466	29.9555	211.13	214.659	87.0367	56.5354	68.1849	19.1636
Laptm4b	1579.99	0.912076	0.240434	3.79345	0.000148568	0.00300467	1895.47	2361.91	1398.55	1907.18	2753.08	1790.43	1512.2	1671.07	1386.67	1352.99	1072.11	1170.09	1150.85	1365.37	911.881
Mmp17	51.7917	-1.70707	0.450095	-3.79268	0.000149029	0.0030097	44.1053	42.4212	18.663	29.5691	17.4939	40.8049	49.2889	53.586	42.2693	31.6071	53.7079	67.5144	94.9205	121.673	69.2503
Tnfsf12	316.742	-1.07207	0.282698	-3.79227	0.000149276	0.00301043	266.495	348.517	286.387	136.753	258.667	254.965	266.037	325.246	304.309	303.009	347.053	286.603	357.461	619.71	389.916
Trafd1	646.542	-1.30491	0.344209	-3.79103	0.000150024	0.00302125	540.067	533.698	346.134	442.522	455.394	402.266	440.821	920.452	493.11	737.199	593.929	580.366	1161.41	1444.81	605.947
Lcn2	823.202	3.89561	1.02785	3.79006	0.000150611	0.00302878	1832.24	1112.62	305.444	1686.75	234.689	1205.6	999.097	1626.07	113.891	512.19	1741.6	767.675	31.8886	154.413	23.8569
Bmp6	90.9164	2.51608	0.66402	3.78917	0.000151154	0.00303116	165.267	62.1277	112.964	236.986	98.3911	144.742	85.695	67.9131	92.4448	32.1676	158.227	22.9039	28.8957	39.8412	15.1799
Tom1l1	764.282	1.41941	0.374573	3.78941	0.000151003	0.00303116	977.431	1106.12	1042.42	854.526	1235.73	882.633	623.964	355.788	907.522	640.488	849.318	876.274	275.452	238.207	598.365
Carhsp1	5333.71	1.15191	0.304041	3.78867	0.000151458	0.00303298	6566.82	6419.16	6445.94	6141.89	7917.21	5159.15	6415.63	3551.03	6419.88	3977.08	7032	5310.71	2301.69	2331.25	4016.18
Ppid	5630.54	0.94339	0.249028	3.7883	0.000151684	0.00303326	7345.48	5895.9	7519.8	8035.11	5010.79	7244.18	6719.19	4437.1	4583.04	5051.14	6124.59	5940.51	2728.46	3287.02	4535.79
Zfp819	17.2894	4.11105	1.08553	3.78712	0.000152404	0.00304339	19.3893	13.8526	16.7999	17.52	13.3854	39.0795	10.3284	10.3174	29.9687	18.9411	58.0487	7.53077	0	3.26893	0.911082
Itgb2	31.6577	2.20396	0.582664	3.78256	0.000155222	0.00309531	36.159	14.8483	23.6219	88.8866	55.3554	35.1387	37.0413	37.3005	32.4419	15.0868	36.3567	23.5307	6.30883	12.722	20.0671
Polr1b	2725.86	0.809125	0.213972	3.78145	0.000155917	0.00310483	3059.79	2852.08	2434.19	3616.2	2708.72	4364.11	3187.27	2482.52	2346.08	2372.66	2724.6	2639.12	1746.08	1844.56	2509.89
Dse	3095.13	-0.929879	0.245967	-3.78051	0.00015651	0.00310883	2184.18	3288.56	2237.29	2232.56	2737.15	2052.16	1991.89	3198.09	3090.04	4088.21	2613.15	3336	4669.15	4735.72	3972.81
Thbs1	51166.4	-2.08819	0.552366	-3.78044	0.000156553	0.00310883	19204.2	52831.3	14748.4	36771.6	22040	22465.3	22331.2	33353.4	90663.5	42602.9	22719.2	42163.6	61502.5	157337	126761
Cd59b	204.646	2.2663	0.600115	3.77643	0.00015909	0.00314899	510.037	214.81	430.578	239.805	206.798	451.387	62.2067	71.4925	176.675	181.879	118.667	218.53	17.4758	53.1282	116.215
Pcdh15	11.1812	3.11145	0.823962	3.7762	0.000159239	0.00314899	7.06426	14.0612	21.1304	10.21	9.94706	20.5002	17.0493	12.0048	18.2525	16.3815	12.4028	4.03919	0.874437	0.944983	2.85467
Plac1	25.8675	2.51111	0.664916	3.77658	0.000158999	0.00314899	54.742	19.5153	50.5472	45.1123	49.7887	35.6653	25.8489	15.7047	14.2598	9.49852	32.0909	11.9417	5.16733	3.94573	14.1845
Col10a1	78.605	-5.35549	1.41881	-3.77463	0.000160243	0.00315129	10.2017	8.4241	165.947	6.58295	1.87412	4.9569	5.2253	149.203	6.40706	234.921	11.5074	24.8955	377.637	159.365	11.9271
Lgals3bp	2983.64	-1.99915	0.529688	-3.77421	0.000160517	0.00315129	2702.21	4343.69	2368.85	968.168	1425.8	1093.29	4135.21	4702.92	2210.57	1331.63	950.442	4580.55	4900.18	6736.18	2304.93
Lyrm9	153.34	1.40242	0.37151	3.77492	0.000160062	0.00315129	220.684	118.441	264.422	189.142	114.562	224.221	247.259	157.531	216.907	84.2166	142.785	119.415	60.4332	80.2203	59.8631
Naa60	1072.61	-0.406262	0.107611	-3.77528	0.000159829	0.00315129	1036.16	1078.82	948.09	1005.19	990.358	996.754	992.622	1021.38	986.78	901.871	1100.09	1066.34	1383.36	1352.52	1228.88
Reep2	28.0617	2.38128	0.631016	3.77372	0.000160832	0.00315129	60.1899	53.7036	69.9777	15.9872	33.7341	64.4398	18.8111	8.23189	14.6447	13.6469	25.8917	19.9164	10.9604	7.53753	3.25284
Sgk2	10.5062	7.00171	1.85462	3.77529	0.000159824	0.00315129	11.9711	22.5549	7.09746	47.0011	20.0713	7.07827	34.243	2.19166	1.29967	0	4.08498	0	0	0	0
Thrb	10.0699	4.92368	1.30477	3.77361	0.000160902	0.00315129	17.321	3.57573	4.24329	27.9423	38.1949	21.6266	1.77437	10.3709	8.97287	1.14607	10.5831	2.53615	0	0	2.76144
Fndc1	39.4553	-6.16907	1.63623	-3.7703	0.000163053	0.00318903	0	4.72763	0	0	5.88985	0	3.75354	11.0874	70.0746	1.75055	48.2539	14.3068	21.4727	40.7144	369.799
Dnajc19	632.654	-0.64336	0.170765	-3.76752	0.000164878	0.00322032	695.488	569.539	729.834	493.274	482.818	431.554	785.719	727.536	541.745	631.688	583.953	617.386	705.802	817.581	675.896
Tram2	1624.96	-1.04701	0.278106	-3.76479	0.000166686	0.00325117	948.785	1663.82	830.528	1147.24	1473.19	1150.61	1182.87	1978.1	2091	1534.68	1213.82	1367.54	2698.23	2566.47	2527.47
Maml2	1175.68	-1.72035	0.45743	-3.7609	0.000169305	0.00329774	378.963	727.78	419.584	649.976	912.808	648.423	594.893	1193.53	1616.15	1952.34	569.668	685.405	2769.97	2322.8	2192.84
Map3k15	40.3781	1.91252	0.508616	3.76024	0.000169754	0.00330198	53.0487	45.2795	35.9885	107.208	26.2376	48.5777	34.487	26.7536	39.3577	39.9658	56.5782	43.8161	15.9425	13.9983	18.4328
Gm4737	4468.89	0.871187	0.23182	3.75804	0.000171252	0.00332444	3101.31	4143.6	3562.86	4335.34	3334.99	5421.86	11048.4	8341.99	7399.24	2600.7	3668.95	2916.76	2422.26	2031.9	2703.11
Tmem248	2603.66	-0.509989	0.135716	-3.75775	0.000171447	0.00332444	2258.69	2225.61	2712.34	2322.71	1961.56	2253.71	3144.04	2445.79	2970.54	2474.39	2391.66	2583.25	2911.79	3067.45	3331.31
Wee1	995.712	-0.623918	0.166045	-3.75752	0.000171608	0.00332444	753.904	906.644	871.722	880.235	861.157	1017.16	831.869	1043.39	825.596	1028.39	795.931	869.352	1501.58	1543.04	1205.72
Fgf1	11.8358	4.32702	1.1529	3.75315	0.000174624	0.00337828	10.2465	18.1436	8.70181	23.5097	33.1946	5.3105	6.99755	4.13394	21.1716	24.6193	14.1262	4.48399	0	0.721014	2.1773
Trpc6	208.879	3.52883	0.940797	3.7509	0.000176202	0.00340418	225.457	407.516	247.921	19.7489	504.137	96.1639	83.6049	36.0145	153.77	245.643	237.82	821.552	1.99281	29.0733	22.7699
Gpr150	33.4483	2.74889	0.733616	3.74705	0.000178926	0.0034491	28.5647	65.2868	91.9706	54.5445	51.5382	34.6983	51.208	12.3478	23.7977	26.3189	33.5634	6.97075	7.97123	9.69111	3.25284
Lamc2	333.587	1.55968	0.416255	3.74693	0.000179011	0.0034491	261.16	268.216	335.337	675.658	406.423	268.083	571.966	209.998	344.389	362.621	339.606	501.063	128.287	110.857	220.144
Zbtb8a	158.609	-1.50102	0.400822	-3.74486	0.000180496	0.00347303	137.723	108.46	102.967	100.625	104.013	81.2932	101.371	222.261	108.92	217.375	105.485	179.248	297.925	356.417	155.052
Gsto2	88.3667	2.66879	0.712936	3.74338	0.000181563	0.00348556	168.904	119.086	198.811	128.062	79.8672	62.1588	182.872	25.064	79.7138	23.8741	105.293	109.265	7.80922	12.0821	22.6379
Tmem171	187.072	2.69017	0.718667	3.74328	0.000181636	0.00348556	357.345	217.011	105.814	722.658	82.5803	201.769	253.986	71.5264	132.44	119.891	196.326	188.475	26.6731	37.2405	92.3518
Il17ra	73.2499	-1.30094	0.347639	-3.7422	0.000182415	0.0034958	57.1294	47.3856	45.9853	35.736	57.1606	57.5001	89.8752	78.2029	77.8001	39.9658	95.8953	45.8078	131.525	121.677	117.102
Sik3	3838.76	0.558628	0.149376	3.73974	0.00018421	0.00352545	3852.21	4957.95	3780.11	4275.82	4767.4	4299.37	4435.56	3343.93	3807.07	3513.73	3825.13	3663.75	2887.17	2842.86	3329.27
Gp1bb	20.4613	-2.967	0.794055	-3.73651	0.000186589	0.00356142	8.18991	6.57501	14.2674	3.56727	18.2201	0	20.5083	16.5669	20.7092	15.651	12.8308	6.21791	47.9948	63.3928	52.2277
Stx11	261.395	-1.35189	0.361777	-3.73681	0.000186368	0.00356142	155.901	261.558	204.832	129.883	176.047	129.873	184.012	266.169	293.738	547.16	192.813	266.422	377.611	362.165	372.746
Ikzf2	190.221	-1.68301	0.450887	-3.73267	0.000189462	0.00360955	104.366	155.133	95.5263	109.089	94.2119	114.944	78.4029	113.248	306.119	223.5	162.268	273.972	380.852	226.085	415.596
Trim12a	140.44	-1.58961	0.425887	-3.73246	0.000189617	0.00360955	117.525	156.853	125.222	56.6501	99.8276	45.9327	106.086	142.938	192.229	191.099	74.8466	191.458	181.944	274.026	149.968
Limk2	1174.99	-0.807679	0.216624	-3.72849	0.000192633	0.00366207	1170.63	1187.13	1031.53	1017.51	860.833	659.473	1119.09	1123.18	1266.37	1504.57	984.787	1260.95	1153.49	1634.44	1650.88
Nrp1	1641.74	-1.42211	0.3815	-3.72768	0.000193247	0.00366886	1211.96	2521.96	703.775	1059.86	848.975	1200.56	1023.11	1747.22	1310.7	1807.23	1202.53	1656.05	3300.09	2356.02	2676.01
Fkbp15	909.348	-0.686936	0.18435	-3.72625	0.00019435	0.0036755	748.068	919.545	840.912	733.53	659.529	789.062	798.541	907.345	1010.25	1018.69	758.275	945.186	1391.39	1169.52	950.388
Snai2	1333.4	-1.13879	0.305577	-3.72669	0.00019401	0.0036755	958.958	1512.13	1084.65	798.418	1215.36	925.95	730.498	1308.87	1574.31	888.021	1230.34	1300.54	2706.23	2031.9	1734.85
Snx33	980.314	-0.629919	0.16905	-3.72622	0.00019437	0.0036755	736.561	892.954	671.785	745.755	895.828	816.898	960.411	1207	1016.89	1102.47	939.774	914.164	1334.18	1396.6	1073.44
Ar	57.4701	3.21303	0.862447	3.72549	0.000194938	0.00368137	61.2101	124.255	126.959	164.574	5.62235	130.862	9.40555	29.8406	16.4753	59.4613	42.1939	58.7534	11.9568	17.2286	3.25284
Pdzrn4	13.94	5.92426	1.59036	3.72512	0.000195224	0.00368188	49.7144	4.49267	13.6405	19.2479	21.9189	28.987	6.1113	11.0317	11.597	2.98868	36.0884	2.12433	0	0	1.15652
Sh3rf3	386.45	-1.75459	0.471154	-3.72403	0.000196065	0.00369286	119.893	427.505	173.308	166.804	365.358	160.805	356.23	418.857	532.511	329.273	141.921	262.952	953.372	698.473	689.495
Socs6	2334.94	0.765196	0.205594	3.72188	0.000197746	0.00371961	2812.66	2601.8	2309.06	2525.66	3180.67	2605.44	2772.47	1708.78	2310.64	2868.24	2378.81	2059.76	1796.2	1403.94	1689.92
Fbf1	1626.64	0.597382	0.160541	3.72106	0.000198387	0.00372674	1673.61	1799.67	1217.23	2154.81	2004.84	2068.03	1410.68	1609.44	1768.2	1526.87	1415.84	1633.69	1290.74	1489.69	1336.23
Gfod2	699.343	0.730507	0.196336	3.7207	0.000198672	0.00372718	640.501	545.244	600.981	917.8	1028.87	922.079	660.252	716.103	861.504	504.812	773.022	590.107	466.9	621.863	640.106
Armc5	795.247	-0.663753	0.178419	-3.7202	0.000199068	0.00372972	700.855	685.511	841.731	674.282	702.794	633.492	759.759	775.856	663.589	697.939	769.08	838.481	1043.23	1310.45	831.644
Repin1	1048.35	0.889557	0.239184	3.71912	0.000199915	0.00374066	1165.95	1177.95	1089.55	1000.04	1595.37	1287.28	1103.94	1011	1280.87	1069.82	1170.27	677.199	830.858	674.232	590.856
Clcn3	908.576	1.0699	0.287797	3.71755	0.000201162	0.00375906	812.844	741.774	835.704	1273.26	2006.02	964.29	820.143	543.151	883.234	1084.37	888.543	753.607	716.598	520.749	784.34
Cav2	2276.11	-1.34013	0.360557	-3.71684	0.000201726	0.00376468	1526.74	1902.92	1449.21	1695.75	1701.67	1266.65	1675.65	1870.95	2247.49	3463.69	1425.28	2107.29	4599.17	5211.26	1997.87
Fbxo28	1887.43	0.496234	0.133756	3.70999	0.00020727	0.00386308	1888.11	1943.63	1875.96	2124.03	2419.31	2121	1758.57	2080.54	2191.7	1738.52	1819.76	1625.36	1686.18	1333.47	1705.36
Pik3ip1	247.018	-2.05689	0.554617	-3.70867	0.000208353	0.0038782	173.477	169.063	135.494	138.127	158.63	77.5229	198.936	393.669	124.527	243.596	163.804	170.64	649.909	779.57	128.312
Slc39a3	493.983	-1.23291	0.332486	-3.70817	0.000208761	0.00388071	351.391	671.969	347.215	319.006	432.329	257.622	372.576	611.644	383.447	450.44	398.179	441.13	683.343	1075.51	613.948
Rnf146	1111.7	-0.589635	0.15904	-3.70747	0.00020934	0.00388642	868.141	1103.92	914.548	963.117	1063.12	875.563	889.165	956.02	1077.49	1210.27	1031.22	1355.17	1496.66	1570.27	1300.79
Epha4	175.888	-3.38068	0.912535	-3.70471	0.00021163	0.00391872	53.0365	31.3971	22.4932	11.5929	75.0162	39.9517	17.9749	116.143	654.339	33.4392	175.468	91.0981	332.749	326.674	656.948
Esd	13866.5	0.896147	0.241885	3.70484	0.000211522	0.00391872	15894.4	12847.4	18791.6	17954.4	11865.9	15598.6	16834.1	10654.6	10403.7	15626.9	20779.7	16342.2	7102.32	8165.42	9136.89
Pcdhb20	68.1348	-1.97466	0.533104	-3.70408	0.000212159	0.00392343	28.5647	23.1663	28.9907	13.1659	33.7341	35.6897	97.1907	268.565	89.6989	14.6216	35.4813	28.8788	128.536	74.2985	121.44
Fbn1	20280.5	-1.89625	0.512262	-3.70172	0.000214141	0.00395494	8822.18	15138.4	5342.62	10744.1	11049.9	13704.2	8670.16	37609.6	13843.4	22509.6	9921.61	14711	58205.6	48813	25121.9
Cacna2d3	48.0527	-5.29498	1.43073	-3.7009	0.000214837	0.00396267	16.3227	9.47711	37.9879	8.4638	0.937059	0	85.695	51.4493	7.32236	51.6631	9.58953	71.6991	243.122	127.061	0
Dact1	344.801	-1.6504	0.446931	-3.69273	0.000221862	0.00408696	172.112	228.302	80.2235	165.242	185.149	321.733	210.168	403.107	399.766	409.398	147.425	339.905	721.935	798.735	588.82
Vgll4	782.583	-1.00882	0.273274	-3.6916	0.000222851	0.00409988	456.292	687.618	362.539	684.278	503.936	558.297	762.772	1108	976.97	938.299	533.437	651.937	1209.93	1198.91	1105.53
Cd34	3319.82	3.85472	1.04449	3.69052	0.000223794	0.00410435	4272.89	1024	2898.08	12616.3	9020.12	3355.4	5416.74	1356.93	2677.55	256.477	5035.29	139.954	366.472	1020.73	340.28
Lysmd4	107.922	-1.29107	0.349852	-3.69034	0.000223957	0.00410435	107.084	63.7445	41.55	46.455	80.727	78.7791	98.2443	149.139	130.982	106.183	119.019	93.4883	190.503	162.097	150.828
Micall2	1963.56	-0.689155	0.186741	-3.69043	0.00022388	0.00410435	1813.64	1356.81	1501.89	1624.6	1733.41	1531.99	2206.13	2287.06	2360.81	1957.36	1897.8	1297.84	2894.71	2808.89	2180.48
Ccni	3603.37	-0.779085	0.211326	-3.68665	0.000227225	0.00415888	2979.34	2852.83	2476.51	2816.54	2949.35	2739.81	3752.43	4541.39	2978.12	4448.82	3766.5	3153.13	5497.27	5470.38	3628.2
Dab2ip	2206.7	-0.980772	0.266106	-3.68565	0.000228122	0.00416996	1462.8	2003.41	1470.41	1600.37	2365.98	1639.87	1328.21	2044.78	2495.68	1969.84	1602.9	2053.99	3443.48	4571.22	3047.62
Myef2	3949.27	0.617209	0.167671	3.68107	0.000232253	0.00424003	3652.32	4316.64	3420.69	5396.99	5102.6	5311.58	3241.87	2871.84	3865.14	4545.55	3365.73	3839.96	3187.75	3163.84	3956.5
Slc5a3	4277.93	1.4274	0.387802	3.68074	0.000232561	0.00424022	5511.97	6513.93	3750.8	6000.83	10076.2	4639.66	2506.06	2461.33	4699.12	1834.53	4002.67	4469.24	2494.99	2213.88	2993.7
Rgs3	519.258	-1.35699	0.369014	-3.67733	0.000235686	0.00429171	360.299	517.191	310.168	286.1	331.632	341.94	338.438	622.616	386.02	942.828	450.804	443.524	1089.78	834.866	532.663
Mrps30	2047.82	0.792354	0.215525	3.67639	0.000236555	0.00430204	2312.72	2218.7	3110.01	2327.54	2180.54	2519.1	2301.22	1732.81	1959.65	1669.79	2266.96	2060.35	1157.82	1153.24	1746.78
Ifitm10	26.5654	-2.76673	0.753053	-3.67402	0.000238765	0.00433671	10.6834	9.61662	12.5626	14.4798	6.22706	11.4201	10.1213	35.5598	18.4534	10.0473	8.60754	31.77	88.7419	112.023	18.1676
Fbln7	36.0355	-4.93374	1.34334	-3.67274	0.000239961	0.00435289	12.5316	7.54548	8.18666	1.92534	1.91846	7.10385	11.7676	111.653	0.936949	6.98486	8.83477	27.5233	55.0788	275.566	2.97473
Tmem263	1716.14	-0.892179	0.243181	-3.66879	0.000243706	0.00441519	1402.73	1411.04	1662.47	1147.31	1766.36	1137.11	1248.85	1943.75	1467.22	1984.64	1704.06	1348.34	2897.54	2568.14	2052.55
Pfkp	1532.9	0.968702	0.264092	3.66804	0.000244414	0.0044224	1519.41	1811.15	1696.49	1535.3	2189.73	1421.69	912.505	1073.31	1841.41	2509.99	1965.64	1886.93	839.232	824.946	965.752
Erich2	8.5532	5.14401	1.40324	3.6658	0.000246567	0.00444444	8.85417	2.9979	10.4397	8.16204	22.5715	5.71771	9.0702	4.89847	4.28711	21.4061	12.0812	17.1481	0	0	0.663899
Kazn	34.4841	-3.74476	1.02145	-3.66611	0.000246263	0.00444444	34.4445	38.9481	58.9209	10.8419	2.44494	4.60182	56.8151	24.9006	3.34194	5.96991	2.6813	35.4037	114.179	98.1449	25.6232
Rgs8	11.4369	4.19261	1.14357	3.66624	0.000246143	0.00444444	6.70217	40.7387	20.8773	14.7172	19.5114	7.63678	6.77085	10.7354	5.92522	18.9464	14.7	1.83963	1.45468	0.497303	0.500763
Thbd	1868.71	2.09931	0.572811	3.66492	0.000247416	0.00444938	4610.14	3822.43	1356.57	1150.14	2376.38	3199.19	420.115	1193.62	1641.12	1746.8	3717.86	1226.85	754.277	347.803	467.325
Txn2	5098.08	0.543053	0.148178	3.66487	0.000247465	0.00444938	5740.3	6167.67	6870.57	5227.03	4843.65	6264.41	5463.69	4829.11	4663.8	4701.31	5104.13	5384.02	3183.34	3883.05	4145.14
Ulk2	795.403	-1.08147	0.295517	-3.6596	0.000252611	0.00453619	438.781	651.912	424.935	563.823	868.662	500.696	556.752	806.63	855.943	957.622	643.675	571.079	1457.7	1094.22	1538.62
Cdc42ep3	3701.59	-0.950316	0.25971	-3.65914	0.000253058	0.0045385	2938.08	3540.23	3821.78	2793.05	2801.8	1889.57	3827.01	2807.07	3917.46	3336.66	4003.63	5384.4	3775.37	4376.07	6311.6
Nif3l1	1390.27	0.799045	0.218704	3.65354	0.000258647	0.0046329	1675.25	1433.04	1654.12	1835.41	1135.34	2143.93	1407.7	1488.52	1338.98	1148.01	1248.48	1405.8	1042.41	818.267	1078.74
Plekhn1	23.113	7.27993	1.99506	3.64898	0.000263281	0.00470999	0	30.5374	41.9866	60.187	29.9859	0	19.8562	51.4493	44.8494	41.9154	24.9328	0.995821	0	0	0
Pgs1	2747.18	0.680684	0.186636	3.64713	0.000265188	0.00473816	3454.63	2807.95	3460.53	3098.49	2639.23	3467.33	3209.96	2517.54	2775.18	2373.98	2853.64	2806	1586.36	1792.4	2364.43
Chrna1	68.7964	3.66899	1.00612	3.64668	0.000265648	0.00474043	29.5849	117.937	158.949	44.1998	422.613	29.7414	29.2617	6.17392	102.513	7.7982	18.2201	25.8913	10.9604	12.9215	15.1799
Cdh18	91.1024	-3.09179	0.848028	-3.64586	0.000266499	0.00474968	145.28	49.0034	53.2221	25.1175	3.50109	19.1632	36.6451	276.494	53.0997	163.955	41.8294	94.0603	222.523	120.017	62.6252
Grik4	17.1743	3.56586	0.978538	3.64407	0.00026836	0.00477687	17.1927	4.10313	6.60314	13.8103	16.7216	120.936	18.1372	12.025	13.0772	7.59655	13.2409	1.4617	5.09432	3.636	3.97886
Adamtsl5	774.493	-0.782306	0.214745	-3.64296	0.000269521	0.004789	862.021	823.774	798.396	384.502	652.893	591.928	509.488	584.835	532.236	1032.34	810.295	1235.24	990.286	982.283	826.878
Tmem9b	777.666	-0.969329	0.266096	-3.64278	0.000269713	0.004789	603.173	696.933	821.074	463.223	534.145	634.383	866.403	944.027	663.89	799.629	556.464	887.081	982.46	1429.65	782.463
Fjx1	620.381	1.58398	0.434927	3.64195	0.00027058	0.00479841	638.625	533.877	1293.59	670.521	1384.04	763.363	679.29	443.493	478.699	340.197	781.547	358.496	315.86	216.435	407.69
Pigk	2754.38	-0.667402	0.183276	-3.64151	0.000271042	0.00480064	2178.9	2924.54	2304.74	2224.96	2242.92	2128.76	2739.53	2969.57	2922.05	3499.19	2168.89	2534.61	3847.81	3376.67	3252.52
Gramd1b	203.968	2.51808	0.69167	3.64058	0.000272029	0.00481214	290.759	206.284	146.558	425.337	395.938	313.782	112.076	111.01	525.096	26.0464	212.386	97.0005	49.8154	40.2565	107.171
Mdk	753.769	5.07944	1.39541	3.6401	0.000272533	0.00481509	98.9214	307.354	2467.1	2418.72	137.047	3097.93	1484.25	104.738	184.49	671.882	96.7741	70.0771	127.6	13.1525	26.488
Enpp1	933.855	1.92064	0.527869	3.63847	0.00027426	0.0048396	1684.37	890.173	951.834	1103.65	1386.24	1156.6	673.068	1238.14	267.398	1578.48	1546.89	568.017	525.18	227.434	210.331
a	16.1174	5.49086	1.51092	3.63411	0.000278937	0.00490551	2.36194	29.2558	18.5161	2.17731	86.7809	14.9194	16.937	14.2941	38.1444	6.77054	5.55053	3.54265	0	0	2.51038
Pcsk6	353.818	-4.13525	1.13792	-3.63403	0.000279027	0.00490551	53.8375	138.956	39.8161	151.78	13.4515	55.2661	77.1986	490.951	30.683	110.891	17.5801	236.077	1468.23	2063.01	359.545
Zfp521	1166.66	-0.955254	0.262836	-3.63441	0.000278619	0.00490551	692.694	1097.24	943.699	793.716	1130.09	660.26	1329.32	1769.86	1338.16	1208.72	730.722	794.665	1668.98	1703.48	1638.35
Mak16	3515.08	0.620743	0.170874	3.63275	0.000280412	0.00492378	4059.25	3419.13	4140.68	4319.36	4186.78	3950.65	3824.92	3021.1	2960.06	3055.92	3914.45	3772.17	2374.43	2478.77	3248.51
Otud4	5727.99	1.00258	0.276009	3.63243	0.000280766	0.00492393	5287.85	5562.67	4401.6	9533.23	10304.9	6033.42	4276.22	3214.43	5568.13	8053.5	5535.59	5235.81	4774.01	3304.46	4834.14
Prtg	162.983	2.4388	0.67168	3.6309	0.000282435	0.00494112	166.753	121.619	236.789	223.673	347.609	213.476	122.746	89.6364	327.351	180.323	229.958	39.9623	54.7432	13.7012	76.4117
Zfp651	205.295	-0.675735	0.186107	-3.6309	0.000282439	0.00494112	161.187	164.27	216.931	199.369	178.978	152.673	200.652	179.044	215.094	170.586	199.462	192.193	261.058	276.735	311.189
Rrp1b	2264.33	0.525887	0.144911	3.62904	0.000284474	0.00497063	2267.62	2389.36	2331.04	2774.35	2144.34	2925.34	2227.23	2283.57	2277.9	2112.02	2445.97	2341.19	1710.41	1635.68	2098.98
Rilpl1	723.379	-0.559321	0.154362	-3.62344	0.00029071	0.00507337	619.242	581.263	655.791	512.53	569.732	690.001	734.678	877.725	907.972	706.712	761.409	622.388	797.123	918.502	895.617
Rnf150	1362.6	-2.27675	0.628579	-3.62206	0.000292269	0.00509433	398.886	1051.96	320.898	181.501	949.24	659.268	550.747	2598.19	1888.25	1669.79	740.312	755.828	2650.43	2109.43	3914.26
Rspo2	235.126	-4.9356	1.36288	-3.62144	0.000292963	0.0051002	41.8269	18.9542	0	20.6893	17.8041	51.5518	59.5685	338.536	9.15295	115.998	16.3022	81.6573	914.698	1695.94	144.209
Hspg2	21597.8	-0.770811	0.212961	-3.61949	0.000295185	0.00513262	22283.9	17628.1	25387	16166.4	18205.4	15986.1	23013.2	18078.7	21271.8	17599.4	25340.5	17083.4	30223	33184	22516.2
Lamp2	10687.8	-0.6003	0.165871	-3.61907	0.000295661	0.00513463	8313.85	11010	7754.55	9484.74	9835.62	8566.7	9187.51	10829	11041.4	11818.5	9661.53	10536.7	15744.8	14235.5	12297.2
Cacng7	827.015	-1.05873	0.292593	-3.61846	0.000296365	0.00513813	656.988	673.928	686.781	528.517	846.164	599.785	677.2	849.943	561.991	887.046	817.987	505.877	1522.5	1690.56	899.954
Col25a1	54.3276	3.46252	0.956956	3.61827	0.000296583	0.00513813	58.9695	224.534	24.5226	33.4327	167.219	50.7685	20.7359	20.7552	106.189	34.5348	37.5515	12.9934	5.90826	2.5114	14.288
Kmt2c	802.516	-0.945342	0.261342	-3.61726	0.000297734	0.00515181	466.026	641.271	453.485	808.794	787.28	571.488	568.359	654.895	843.981	925.222	554.2	587.994	1663.86	1308.42	1202.47
Reep6	158.127	1.18753	0.328723	3.61255	0.000303202	0.00524007	216.856	147.954	182.288	291.02	132.696	212.735	194.774	121.857	120.896	151.512	181.704	138.1	85.7102	114.067	79.7414
Idua	213.07	-1.01325	0.280543	-3.61176	0.000304124	0.00524395	193.759	168.447	130.213	177.141	144.242	136.619	256.399	271.054	211.887	159.079	198.536	223.832	370.781	360.51	193.553
Pgf	95.5133	3.64683	1.00972	3.61173	0.000304162	0.00524395	194.852	147.422	200.936	177.74	21.5523	300.388	119.137	22.6377	65.9012	17.546	23.0149	101.574	0	17.2286	22.7699
Tdrp	55.9441	1.51326	0.419188	3.60998	0.000306223	0.00526732	59.2258	30.4073	45.3268	133.046	59.0585	87.8424	37.6895	40.8079	46.5469	44.1969	79.2465	76.5814	32.8815	24.128	42.1762
Zfp7	410.504	0.681235	0.18871	3.60995	0.000306256	0.00526732	585.576	414.887	455.854	426.011	427.299	535.346	355.321	407.479	329.506	485.438	460.297	408.287	247.108	306.885	312.273
Abcb1a	62.4653	3.10601	0.860591	3.60915	0.000307199	0.00527716	128.511	62.7956	83.6737	177.471	25.7338	114.479	37.6673	26.7849	11.9127	80.8789	92.7202	57.8514	8.47041	28.0292	0
Clec2d	242.765	-1.28312	0.355921	-3.60507	0.000312075	0.00535367	199.953	305.374	227.927	60.187	163.985	148.707	381.447	260.333	295.64	199.829	267.548	223.064	223.194	296.117	388.173
Hoxa7	649.035	2.07252	0.574936	3.60479	0.000312404	0.00535367	352.911	492.727	822.86	718.275	1511.05	961.794	676.797	213.194	1123.51	836.04	902.891	364.597	217.749	125.895	415.239
Ephb2	1779.39	-1.27104	0.352732	-3.6034	0.000314077	0.00537588	889.017	1799.26	911.423	1222.1	1595.49	896.477	1768.11	1979.61	1572.02	2080.19	1313.24	1700.58	3940.82	3268.9	1753.54
Hagh	445.025	1.10556	0.306851	3.60292	0.000314665	0.00537949	601.38	374.734	574.683	617.674	466.011	574.855	654.155	322.377	307.772	426.291	552.845	431.756	225.821	299.314	245.701
Oasl2	423.531	-3.02926	0.840878	-3.6025	0.000315173	0.00538172	350.572	577.138	115.251	43.361	153.123	84.6241	448.568	971.237	222.385	389.966	47.3348	653.45	738.159	1372.28	185.514
Aff3	397.761	-2.34434	0.651226	-3.59989	0.000318352	0.00542301	87.5856	417.9	247.383	248.491	149.305	159.046	148.497	142.328	950.133	150.762	199.24	238.96	973.901	698.751	1154.13
Hoxc13	20.9138	-6.18129	1.71697	-3.60011	0.000318079	0.00542301	3.0605	3.15904	0.999681	0	0	3.96552	1.04506	10.2899	5.49177	0	0.958953	0	0	217.512	67.2255
Rcn3	3386.74	-1.59059	0.441994	-3.59866	0.000319856	0.00544213	2434.12	2357.69	2246.28	2067.99	1186.32	2228.62	3360.92	7711.22	2906.98	1918.36	3090.71	2779.34	7885.54	6328.29	2298.68
Nt5e	140.485	2.35732	0.655131	3.59823	0.000320386	0.00544466	146.066	129.168	218.436	370.016	45.6495	406.799	30.7797	106.037	150.938	145.422	87.6245	109.785	43.544	54.5433	62.4728
Unc5d	15.9418	4.16916	1.15895	3.59737	0.00032145	0.00545623	36.726	16.8482	1.99936	22.5701	100.265	7.93105	4.18024	8.23189	3.66118	12.6721	2.87686	13.9415	3.98561	2.15358	1.08428
Ppic	3812.16	-0.851147	0.236758	-3.595	0.000324389	0.00549958	2876.87	2864.19	4165.67	3280.19	2584.41	2430.87	5342.35	5189.18	3852.48	3486.77	3145.37	2999.41	5135.46	6210.92	3618.25
2210016L21Rik	826.849	-0.540334	0.150335	-3.59421	0.000325381	0.00550984	697.788	654.047	677.939	723.023	731.483	706.399	813.596	1040.31	738.798	912.786	781.079	781.48	931.23	1114.29	1098.49
Cnn2	23218.9	-0.685154	0.190788	-3.59117	0.000329197	0.00556124	21197.6	22821.1	23543.9	18714.3	22741.1	14401.2	23897.5	21206.6	21966.8	20319.9	21338.8	26323.9	26721.2	36200.2	26888.6
Rgs10	132.05	-1.2621	0.351431	-3.59133	0.000328996	0.00556124	101.445	102.782	151.117	132.261	61.2605	82.691	76.3604	78.1693	79.4353	199.419	131.384	124.143	239.595	275.755	144.927
Mertk	471.372	1.71365	0.477559	3.58835	0.000332773	0.00561499	540.352	555.91	338.88	643.537	982.736	901.131	371.66	409.554	283.957	407.146	653.051	212.489	436.793	234.655	98.7272
Jak1	6489.45	-0.910848	0.253868	-3.58788	0.000333382	0.00561863	4060.7	6602.44	4582.2	4631.55	5017.67	5279.29	4867.07	6583.75	7382.3	8727.31	5461.82	6078.26	11651.3	8340.61	8075.52
Prpf6	4137.68	0.473137	0.131912	3.58676	0.00033481	0.00563603	4619.56	4382.9	4094.37	4180.9	4093.07	5491.35	4163.94	4266.49	4138.42	3972.9	4652.35	4092.72	3177.16	3266.01	3473
Dzip1	634.059	-1.19493	0.333239	-3.5858	0.000336046	0.00565017	536.305	577.844	389.925	356.44	556.725	360.988	602.57	1022.95	564.418	680.708	545.73	399.289	1007.84	1265.39	643.762
Clp1	558.437	0.661113	0.184402	3.58517	0.000336854	0.00565042	622.888	530.434	712.568	545.252	592.182	786.932	534.364	603.12	466.653	556.502	582.488	626.237	372.579	432.282	412.082
Tmem44	167.636	-1.0962	0.305751	-3.58527	0.00033673	0.00565042	162.272	153.809	125.145	100.226	182.586	97.4121	162.802	117.119	202.855	104.719	157.78	135.07	312.661	244.448	255.629
Rit1	740.561	-0.572956	0.15988	-3.58367	0.000338806	0.00567649	639.803	647.239	718.181	610.52	569.99	740.519	707.623	706.641	736.343	818.186	641.746	713.831	931.403	1105.56	820.829
Galnt3	86.8466	2.24395	0.626411	3.58223	0.000340668	0.00570099	148.383	107.509	156.882	135.796	176.353	87.2765	89.4328	51.2014	52.551	26.1175	51.3871	134.986	7.62771	42.1994	34.9967
Dcbld2	5523.44	1.10772	0.309269	3.58174	0.000341311	0.00570506	7930.45	7021.43	3762.63	9448.2	4891.26	6847.8	4881.48	3859.73	5659.94	5943.44	7820.52	4953.32	3532.73	2885.91	3412.75
Il11ra1	1430.84	-1.01702	0.283999	-3.58108	0.000342178	0.00570617	1283.89	1348.23	1969.02	691.94	1135.79	1023.54	1782.87	1754.29	1306.27	1264.6	1161.5	971.454	2367.16	2159.64	1242.41
Pitx2	21.8754	-5.7821	1.61451	-3.58133	0.000341849	0.00570617	1.95049	0.973336	0	0	4.11674	0	46.11	27.6253	1.74998	0.901019	9.26845	1.90394	1.90505	44.3587	187.267
Tnrc18	5975.9	-1.54134	0.430501	-3.58034	0.000343142	0.0057089	2855.72	5657.4	1528.67	4286.38	4691.87	3470.69	3083.96	7609.58	6821.83	5464.44	3612.24	4321.33	14410.2	13665.6	8158.64
Wrb	1028.89	1.15097	0.321452	3.58053	0.000342904	0.0057089	1203.8	1116.19	1254.6	1426.62	1338.12	1129.18	1344.99	707.942	1361.04	518.581	980.05	1298.55	504.18	557.777	691.772
Agap1	1309.15	-0.667511	0.186515	-3.57886	0.0003451	0.00573477	977.28	1176.68	958.415	1198.25	1124.22	1274.59	1019.24	1609.45	1499.59	950.27	1132.41	1004.5	2118.19	1658.23	1935.87
Cpeb1	131.484	-1.506	0.4209	-3.57805	0.00034617	0.00574585	81.0137	66.5745	87.4952	99.4394	83.2594	66.6409	163.587	90.5975	233.977	121.759	60.4047	107.554	358.931	165.793	185.233
Sgk3	207.348	-2.56824	0.717951	-3.57718	0.000347324	0.00575831	131.868	164.393	135.343	75.7622	28.521	95.7557	146.57	178.97	150.125	470.462	20.3823	326.933	407.081	557.807	220.247
Dnajb4	1719.83	-0.856078	0.239343	-3.57678	0.000347853	0.00576037	1364.61	1389.37	1824.41	1444.65	1217.85	1091.83	1587.26	995.155	1318.02	2558.1	1705.02	2505.46	2523.13	2447.14	1825.5
Icam5	30.6924	-1.61143	0.45095	-3.57341	0.000352367	0.00581488	18.363	21.0602	31.9898	17.868	14.0559	20.819	26.1265	22.6377	21.0518	47.764	23.9738	33.8579	64.7662	64.6074	31.4442
Rpp25	102.709	2.46642	0.690141	3.57379	0.000351849	0.00581488	52.0286	57.9157	160.949	106.268	362.642	124.914	126.452	48.3623	87.8683	64.3352	198.503	42.8203	18.9317	38.7644	49.877
Rspo4	17.0151	5.20372	1.45621	3.57347	0.000352287	0.00581488	7.14118	32.6434	46.985	24.451	84.3353	5.94829	16.721	2.05797	16.4753	2.92433	12.4664	0	1.99281	0	1.08428
Dctd	1734.58	0.766989	0.214749	3.57156	0.000354855	0.00584241	2065.99	1686.42	1767.69	2049.78	2427.62	2025.41	1792.73	1713.1	1754.6	1394.12	1867.35	1652.24	1157.09	936.487	1728.13
Peak1	7427.95	1.35027	0.378054	3.57163	0.00035476	0.00584241	6482.06	10276.2	3923.79	12531.4	15394.7	9047.51	6237.14	4277.4	8730.27	7481.43	7135.01	5400.01	4209.82	3437.73	6854.78
Gsr	2684.93	0.666927	0.186791	3.57044	0.000356387	0.00585639	2453.79	2756.18	2384.66	3095.61	3512.35	3677.53	2654.47	2993.8	2159.18	2910.7	2767.9	2428.79	2644.6	2160.07	1674.36
P4ha2	2695.92	-0.836221	0.234214	-3.57033	0.000356526	0.00585639	2434.57	2031.25	1534.82	2217.77	1486.57	2007.12	2607.92	3869.65	3667.96	2872.54	3107.28	2405.34	3662.6	3705.56	2827.93
Ptprn	2417.16	1.40153	0.392691	3.56905	0.000358281	0.00587845	3615.62	3600.22	3124.78	2119.75	3362.99	2762.27	3171.72	1979.98	2873.41	1916.45	2765.76	1843.01	592.948	630.464	1898.04
Apol6	98.8553	-3.52582	0.988363	-3.56733	0.000360634	0.00591026	28.6895	81.3697	10.0179	12.8505	18.638	28.5999	37.1922	295.275	16.657	138.038	42.0239	80.0384	322.886	336.83	33.7241
Slc35g1	188.684	2.13672	0.599213	3.56587	0.000362652	0.0059365	218.316	181.118	274.912	456.105	68.4053	281.552	459.827	128.623	171.16	140.368	114.115	152.361	43.8418	46.302	93.2482
Isl1	43.9302	3.40209	0.954302	3.565	0.000363852	0.00594931	12.5001	30.1059	9.59694	11.523	234.966	146.877	28.9585	49.3138	37.2417	2.00525	25.8966	33.169	6.29744	14.2214	16.2808
Ank	2948.89	2.58909	0.726454	3.56401	0.000365237	0.00596512	6161.02	3521.88	1832.36	1965.47	10024.9	4484.22	1753.75	2739.69	747.478	1180.22	4851.55	2232.52	293.962	552.005	1892.41
Dfna5	577.391	0.794807	0.223076	3.56295	0.00036671	0.0059815	750.025	614.506	737.588	582.328	519.229	677.255	609.121	713.256	585.021	702.036	612.299	531.832	463.813	273.852	288.709
Itgb3	328.087	2.09475	0.587968	3.56269	0.000367079	0.0059815	482.804	543.461	446.216	297.958	876.673	346.699	509.162	108.673	307.334	118.487	293.32	234.152	49.6376	113.355	193.375
Cnpy4	1882.53	-0.605653	0.170016	-3.56233	0.000367572	0.0059827	1534.51	1526.57	1749.5	1413.69	1647.15	1529.16	2154.57	2500.48	1855.37	1586.55	1865.47	1890.3	2020.19	2833.8	2130.7
Lrrc32	2214.07	-1.97715	0.555096	-3.56182	0.000368296	0.00598764	1689.4	1107.77	1110.65	1219.73	719.661	1069.7	1596.85	4711.73	1557.83	3146.58	1482.54	1951.81	7786.89	2597.22	1462.7
Stip1	13758.2	0.46411	0.130334	3.56094	0.000369525	0.00600078	15218.9	15399.3	14091.5	15824.5	12718.7	16775.2	14914.1	12568	13149.1	14171.3	14418.8	14271.1	9957.06	10807.7	12087.6
Nos2	85.6449	3.82489	1.07487	3.55848	0.000373003	0.00605038	153.025	54.7566	28.9907	125.076	9.37059	243.88	62.7037	118.333	99.7671	71.1586	231.108	59.7493	3.98561	0	22.7699
Cdh11	6611.42	-1.68691	0.474215	-3.55727	0.000374736	0.00607157	2867.69	6470.76	2846.09	1901.53	5095.72	3671.08	3893.9	10710.7	12124	5700.49	3086.87	6453.92	8651.77	13183.1	12513.7
Ids	1788.27	-1.48387	0.417295	-3.55592	0.000376653	0.00609572	1030.66	1438.74	881.653	1580.07	1456.95	817.458	1128.98	1431.79	1399.71	2558.21	988.399	1330.45	4595.05	4485.7	1700.31
Plp2	8546.57	0.82601	0.232536	3.55218	0.000382055	0.00617612	10587.1	8915.45	10877.2	9038.79	11370.1	9721.11	8461.93	7498.11	6662.82	8026.21	10394.8	9648.37	4231.41	4755.65	8009.51
Trim12c	170.494	-2.16559	0.609722	-3.55177	0.00038265	0.00617873	145.497	193.465	80.3778	60.6736	82.8576	63.7657	97.0307	197.241	162.157	244.353	38.5516	261.173	323.357	470.958	135.959
Cfh	35.9001	4.43275	1.24827	3.55112	0.0003836	0.00618706	12.9187	12.2027	10.7198	14.1041	8.40951	180.22	9.16193	116.96	5.34953	44.0173	92.1179	23.068	2.72689	5.2445	1.28116
Elavl4	71.2605	2.0393	0.574793	3.54789	0.000388333	0.00625633	77.3167	112.984	192.291	104.853	104.809	53.1007	61.8683	29.4352	68.592	52.2119	73.8921	73.6388	14.0452	8.09502	41.7746
Isg15	1260.18	-2.71094	0.764218	-3.54734	0.000389147	0.00626237	1515.97	2253.45	891.715	186.204	213.649	396.552	1596.85	1888.19	666.335	1272.08	224.395	2583.16	1398.95	3493.11	322.032
Kdelr3	1185.88	-1.17042	0.330045	-3.54623	0.000390784	0.00628163	738.602	842.41	810.741	553.908	1086.99	800.044	758.714	1762.65	1315.28	1285.73	1497.88	841.469	2171.16	1806.85	1515.83
Glipr2	4683.36	-0.527033	0.14867	-3.54499	0.000392626	0.00628995	4708.08	4998.18	5245.17	2757.06	3870	3766.31	4836.52	4892.27	4597.74	5986.36	5024.98	4591.77	5033.3	4984.57	4958.03
Nipsnap1	254.28	1.31654	0.371376	3.54503	0.000392565	0.00628995	428.268	302.195	239.753	479.049	240.432	377.382	405.195	277.324	190.255	105.602	140.907	187.432	186.672	133.238	120.504
Tubg1	2156.11	0.580546	0.16374	3.54553	0.000391826	0.00628995	2943.91	2218.04	2551.93	2250.37	1909.69	2588.22	2504.04	2289.32	2241.11	1855.65	2359.32	2117.41	1388.19	1672.52	1451.94
Clec11a	49.2968	-4.21696	1.18976	-3.54439	0.000393525	0.00629263	4.08067	6.31807	4.9984	1.88084	9.37059	13.8793	7.31543	189.333	5.49177	8.77298	16.3022	4.97911	235.151	221.819	9.75853
Epcam	8.58318	4.14215	1.16868	3.54429	0.000393675	0.00629263	10.2017	3.15904	14.9952	19.7489	21.5523	13.8793	16.721	5.14493	2.74588	2.92433	8.63058	5.97493	1.99281	1.07679	0
Gch1	283.311	1.85139	0.52273	3.54177	0.00039745	0.00634585	250.961	349.6	562.82	324.446	640.948	221.078	424.295	183.16	196.788	364.566	204.257	198.168	176.363	96.9111	55.2984
Taf9b	98.9064	-1.42984	0.403813	-3.54086	0.000398832	0.00636079	72.8639	69.9133	71.4006	48.2475	69.7558	69.8105	41.0004	146.987	130.747	105.904	81.0324	70.1232	201.471	153.816	150.523
2310022B05Rik	7091.07	-0.873445	0.246719	-3.54025	0.000399755	0.00636348	4991.68	6404.42	4478.57	6233.12	4378.87	6623.42	5407.15	9553.11	5652.86	7846.94	6168.94	7051.41	10186.2	11266.5	10122.9
Pi4k2a	2040.13	0.498955	0.140951	3.53992	0.000400248	0.00636348	1954.64	2507.22	2114.32	2037.89	2657.5	2437.81	1743.16	1811.02	1883.68	2055.8	2316.83	2034.46	1655.03	1567.81	1824.85
Rbp4	131.055	3.3204	0.938002	3.53986	0.000400339	0.00636348	190.625	97.3116	83.2463	147.073	25.6933	264.78	189.97	610.256	33.4621	129.678	119.782	30.3384	29.3442	6.56103	7.70779
Fam222b	781.353	0.587	0.165978	3.53661	0.000405298	0.00642267	983.397	841.039	704.23	1013.84	859.961	905.833	698.207	671.292	890.869	702.771	812.764	785.508	581.898	631.048	637.637
Gtpbp10	1044.32	0.674853	0.190811	3.53675	0.000405076	0.00642267	1055.72	1169.82	950.592	1545.86	1097.83	1189.52	1106.27	895.381	1155.95	1247.5	843.071	1006.44	817.54	785.595	797.764
Mars2	781.553	0.538457	0.152256	3.53653	0.000405415	0.00642267	728.4	827.668	721.77	1053.27	1029.83	941.812	733.633	616.363	840.241	696.965	693.323	756.824	647.662	629.922	805.621
Brap	1421.59	-0.516497	0.146146	-3.5341	0.000409159	0.00646928	1368.72	1046.29	1206.36	1298.13	1063.96	1279.28	1661.4	1431.63	1279.4	1462.75	1424.6	1595	1742.16	1778.96	1685.16
Cmya5	27.9146	-3.31891	0.939126	-3.53404	0.000409264	0.00646928	8.16134	6.31807	6.99777	14.1063	5.62235	6.93967	6.27037	38.0725	8.23765	26.3189	9.58953	15.9331	158.428	101.218	6.50569
F930015N05Rik	7.34292	-6.89137	1.95033	-3.53343	0.000410201	0.0064769	2.04034	5.26506	2.99904	0	0	0	0	3.08696	31.12	0	0	2.98746	13.9496	13.9983	34.697
Igfbp6	766.304	2.50778	0.709995	3.53211	0.000412253	0.0065021	1638.39	596.005	1008.68	424.13	2014.68	493.708	689.74	414.681	785.323	430.851	1709.81	772.757	40.8525	149.674	325.284
Slc35f6	1129.24	-0.716647	0.20292	-3.53167	0.000412938	0.00650572	842.954	1089.97	855.347	820.229	889.946	955.821	1107.66	1382.86	1161.07	1425.41	924.486	1102.15	1655.36	1544.03	1181.34
Sntb1	54.4464	2.32951	0.659735	3.53097	0.000414035	0.0065158	86.1989	78.7472	22.3306	54.8005	141.691	99.1719	15.2245	52.9659	31.1129	89.1461	65.1938	21.2772	16.4511	23.0072	19.378
Angpt4	30.8935	-3.82756	1.08474	-3.52855	0.000417851	0.00656859	17.3429	10.5301	2.99904	1.88084	5.62235	7.93105	4.18024	107.015	21.0518	18.5207	3.83581	43.8161	94.6583	96.9111	27.107
Nxpe3	164.757	0.950247	0.269374	3.52762	0.000419316	0.00658438	187.711	201.125	193.938	183.382	190.223	182.414	230.958	114.217	174.821	154.015	178.365	192.193	84.6943	79.6824	123.608
2610008E11Rik	493.535	-1.40867	0.399469	-3.52637	0.000421302	0.00659512	328.494	380.137	388.876	275.544	499.452	229.009	183.931	406.45	644.368	568.294	336.593	495.919	910.713	808.669	946.578
Cldn1	87.4428	2.48228	0.70393	3.52631	0.000421388	0.00659512	104.057	63.1807	92.9703	47.0211	371.075	178.449	101.371	33.9565	113.497	19.4955	51.7835	27.883	12.9532	54.9163	39.0341
Mipol1	238.674	1.10178	0.312444	3.52634	0.000421342	0.00659512	232.927	245.331	313.058	276.052	237.359	514.526	265.032	151.97	208.357	204.132	218.868	234.125	173.357	132.892	172.121
Grk5	525.655	-1.48696	0.421713	-3.526	0.000421883	0.00659562	240.76	719.207	351.888	271.782	428.236	262.716	321.879	369.406	560.16	494.211	424.816	740.891	706.45	1316.91	675.507
Otud1	456.237	1.22492	0.347482	3.52512	0.000423284	0.00661027	436.632	523.347	646.793	651.712	612.836	628.535	490.134	318.986	316.692	313.878	589.756	503.885	146.471	267.044	396.847
Ebf2	22.9597	3.82045	1.08412	3.524	0.000425082	0.00663109	28.2481	1.10769	3.49031	67.7486	47.5088	44.1903	7.2975	19.1288	16.7773	9.97444	66.1218	21.7302	1.68392	1.1327	8.2557
Homez	187.856	1.20085	0.340836	3.52324	0.000426299	0.00664281	273.224	207.416	147.908	256.859	190.383	226.91	297.463	184.379	167.649	253.033	195.536	123.581	112.165	103.2	78.1344
Adm2	75.2139	-2.05274	0.582698	-3.52281	0.000426992	0.00664634	92.8353	54.7566	77.9751	63.9487	25.3006	25.7759	44.9376	32.9276	30.2047	16.5712	93.0184	92.6114	218.212	157.211	101.922
Esrrg	40.4433	-3.38105	0.960553	-3.5199	0.000431713	0.0067125	13.2968	4.40664	3.48622	28.7997	2.87377	16.7566	1.45779	5.52247	12.9559	8.96833	2.94092	19.1272	151.475	293.847	40.7346
Chrm4	20.4123	2.64311	0.751677	3.51629	0.000437627	0.00678249	23.4639	18.9542	47.9847	28.2127	25.3006	39.6552	28.2166	5.14493	11.8988	23.3946	23.9738	14.9373	0.996404	6.46074	7.58997
Sec1	21.9664	3.26277	0.927905	3.51628	0.000437641	0.00678249	37.7462	8.4241	11.9962	48.9019	12.1818	59.4829	32.3969	33.9565	4.57647	15.5964	27.8096	23.8997	4.98202	6.46074	1.08428
Tiparp	1683.67	1.06025	0.301488	3.51671	0.000436928	0.00678249	1710.33	2082.74	1535.31	3117.34	3009.49	1606.35	1262.63	853.448	1679.67	1799.44	1318.62	1571.14	1530.65	1095.35	1082.48
Cfap69	268.515	2.32372	0.660907	3.51595	0.000438178	0.00678343	382.914	377.116	647.999	452.529	304.589	206.187	152.666	154.183	338.529	202.575	194.058	422.854	7.8519	54.9277	128.754
Cyp39a1	113.195	-2.15005	0.611756	-3.51455	0.000440492	0.00679512	59.1697	121.096	48.9844	31.9743	86.2094	25.7759	51.208	86.4348	99.7671	296.332	70.9625	80.6615	230.169	254.122	155.052
Echdc3	120.514	1.34299	0.382066	3.51509	0.000439607	0.00679512	156.244	181.728	200.236	128.971	190.597	140.513	132.251	124.527	97.0081	87.7677	138.541	48.3586	39.1578	61.8213	79.9942
Glis1	81.1037	-2.32292	0.661035	-3.51406	0.000441316	0.00679512	27.294	36.1831	19.3614	35.8058	84.5734	19.1735	26.9489	89.4242	35.4039	75.4093	27.8503	42.6474	342.828	270.729	82.9238
Nfib	3494.39	-1.31005	0.372801	-3.51408	0.000441288	0.00679512	2400.65	2125.37	2838.61	3576.29	1852.63	2351.22	2111.43	2567.26	3694.77	4845.89	2091.59	2669.8	8993.8	6157.3	4139.24
Wtip	804.203	-0.957806	0.272514	-3.5147	0.000440244	0.00679512	768.718	737.075	956.174	664.925	432.45	576.454	1234.79	572.749	711.991	769.734	698.393	689.014	1044.56	1235.47	970.54
Mgarp	75.8954	2.49486	0.710074	3.51352	0.000442207	0.0068015	40.207	117.453	141.045	44.8834	138.316	74.4704	93.7448	35.0346	117.281	110.344	137.742	42.2979	5.0208	13.2735	27.3181
Fat1	17671.9	-0.926071	0.263631	-3.51275	0.000443495	0.00680663	15326.3	16054.2	8395.98	12758	14611.1	14099.3	11833.9	15726.3	22464	17600.4	17547.6	19867.1	23666.9	26611.7	28515.7
Hspa8	87565.5	0.576763	0.164188	3.51281	0.000443386	0.00680663	101082	67028.9	79410.6	117989	97084.1	107075	75106.8	87137.1	81291.4	85179.8	105591	93518.5	71542.8	67190.5	77256.2
Mrpl49	1599.11	0.506793	0.144305	3.51196	0.000444808	0.00681483	1672.06	1685.87	1869.4	1702.16	1666.09	1904.44	1676.28	1575.38	1670.41	1456.31	1713.65	1682.94	1035.26	1199.54	1476.79
Tjp2	659.46	2.24073	0.638046	3.51186	0.000444986	0.00681483	1172.17	493.863	597.809	1278.03	523.816	908.105	837.094	255.189	619.655	782.745	1058.68	791.678	408.525	40.918	123.608
Snx17	2959.79	-0.51517	0.14673	-3.511	0.000446417	0.00682941	2236.21	2756.79	2387.24	2461.08	2754.95	2788.75	2805.99	3433.73	3028.71	2818.08	2523.01	2961.57	3266.21	4351.31	3823.18
H2afy	5361.45	0.518771	0.147996	3.5053	0.000456089	0.0069699	5975.51	5299.21	5744.35	5411.96	5821.15	7707.97	5318.6	4658.96	5000.49	5171.7	5852.08	5239.48	4107.2	4279.02	4834.08
Fam20c	249.147	-1.94373	0.554583	-3.50486	0.000456853	0.0069741	125.744	63.9261	105.283	66.2017	30.7601	266.704	292.478	287.359	370.43	281.667	249.079	205.861	452.523	404.081	535.112
Apol9a	557.613	-2.44791	0.698919	-3.50242	0.000461054	0.00703071	670.303	884.542	235.924	140.128	112.448	142.758	877.848	890.058	230.659	732.069	125.623	1164.84	587.887	1236.24	332.876
Dlx5	37.6968	-5.00029	1.4281	-3.50136	0.000462892	0.00705119	3.91941	5.05699	1.04467	8.12931	0.979229	6.66541	0	22.7314	0	2.03729	7.01476	2.08127	241.94	259.32	4.53231
Wdr62	814.118	-0.935527	0.267235	-3.50077	0.000463915	0.00705923	801.209	615.49	933.442	494.88	578.455	731.73	917.694	632.921	532.469	759.356	748.482	1015.9	1224.25	1341.24	884.251
Gzme	78.3612	2.89936	0.828364	3.50011	0.000465072	0.00706177	185.671	95.8241	43.986	45.1402	23.4265	74.3536	35.5321	62.7682	32.0353	40.9406	241.656	274.847	2.98921	2.15358	14.0957
N4bp3	206.349	1.12351	0.320986	3.50019	0.000464923	0.00706177	284.592	154.606	240.27	255.352	206.372	302.533	284.724	147.154	244.986	260.952	209.831	153.188	117.795	106.767	126.117
Mkl1	2919.59	-0.704967	0.201519	-3.49826	0.000468313	0.00710341	2449.99	2771.34	1880.41	2317.47	2582.13	2184.77	2488.88	3601.89	3204.8	3017.38	2453.72	3292.42	3539.6	4489.86	3519.26
Adra2a	172.21	3.79494	1.0849	3.49796	0.000468829	0.00710368	260.143	97.9301	29.9904	26.3318	863.968	175.474	193.336	52.4783	238.892	17.546	452.626	97.5905	11.9568	24.7662	40.1184
A930004D18Rik	468.117	0.811673	0.232075	3.49746	0.000469709	0.00710947	482.74	574.182	440.219	519.607	710.29	573.872	564.977	328.609	415.774	518.178	465.037	400.157	306.418	318.88	402.814
Irg1	5.81432	5.86601	1.6776	3.49667	0.000471106	0.00712304	14.2824	10.5301	6.99777	3.76169	29.0488	0.991381	7.31543	4.11594	8.23765	0.974776	0.958953	0	0	0	0
Zswim3	222.976	0.742225	0.212376	3.49487	0.000474299	0.00716372	241.78	253.776	232.926	230.403	263.313	310.302	197.517	232.551	247.13	187.157	240.697	226.051	127.54	151.827	201.676
Adck1	66.7727	-8.45816	2.42209	-3.49209	0.00047925	0.00721557	85.2427	97.1776	32.0921	0	0	0	157.669	0	177.753	141.806	95.5701	27.9807	184.16	0	2.13898
Anp32e	7351.2	0.586989	0.16808	3.49232	0.000478839	0.00721557	8643.24	7574.08	8046.29	8219.68	7612.31	10082.3	8131.84	6323.25	7066.46	7377.62	7218.33	6720.72	5569.43	4782.11	6900.24
Pdgfrb	4985.39	-1.6317	0.467252	-3.49211	0.000479223	0.00721557	1542.47	4292.16	1595.68	1536.64	4985.73	2601.04	3171.08	7441.18	7078.9	5064.41	3675.66	3524.25	8921.38	8688.5	10661.7
Ccnh	1281.14	0.74983	0.214794	3.49093	0.000481338	0.00723937	1553.53	1203.48	2096.67	1463.15	1588	1381.63	1220.24	914.815	1223.25	1264.08	1304.88	1366.17	715.456	933.307	988.484
Map3k7cl	8.77808	-5.47622	1.56953	-3.48907	0.000484696	0.00728219	3.0605	4.21205	2.99904	0	0	1.98276	1.04506	6.17392	5.49177	2.92433	15.3432	1.99164	1.99281	17.2286	67.2255
Isyna1	585.098	1.94167	0.556571	3.48863	0.000485506	0.00728668	477.439	700.253	882.718	381.811	824.611	1393.88	897.707	200.652	507.073	535.152	777.711	520.814	359.702	107.679	209.266
Per2	172.482	-1.3487	0.386737	-3.48738	0.000487775	0.00731304	100.996	103.264	56.9532	143.645	108.521	151.429	85.8917	211.426	164.13	200.288	115.535	117.187	456.587	258.458	312.916
Casp7	158.635	-1.4527	0.416646	-3.48664	0.000489123	0.00732305	80.5933	123.202	109.965	74.2933	145.244	61.4656	123.317	300.464	199.534	130.62	166.858	94.603	334.792	187.361	247.216
Gm4951	17.3625	-4.98847	1.43081	-3.48645	0.00048947	0.00732305	11.2218	23.1663	0	0.940422	3.74823	0	10.4506	23.6667	12.8141	11.6973	0.958953	11.9499	51.813	94.7575	3.25284
Matn3	27.7654	-2.53717	0.727912	-3.48555	0.000491125	0.00734011	13.2622	15.7952	18.9939	16.9276	2.81118	13.8793	17.766	17.4928	44.8494	19.4955	16.3022	23.8997	40.8525	129.215	24.9385
Fkbp9	10465.3	-0.773589	0.222019	-3.48433	0.000493367	0.00735925	8439.01	9484.68	8532.12	6200.65	8366.72	9932.94	9312.23	14576.4	10091.1	10996.3	10262.8	8901.34	16096.9	14266.5	11519.4
Heca	439.517	-1.18353	0.339675	-3.48429	0.000493438	0.00735925	259.123	330.646	313.9	410.024	331.719	203.233	253.95	406.45	401.814	751.552	337.551	446.128	828.011	755.906	562.742
Adam22	211.564	1.52198	0.436955	3.48315	0.00049555	0.00738251	284.004	201.094	192.212	142.431	153.174	420.015	209.015	284.23	477.801	156.114	156.38	248.646	85.4982	86.0847	76.7584
Mtcl1	617.231	2.48854	0.714506	3.48289	0.000496033	0.00738251	830.373	645.279	572.557	1171.85	667.174	1302.91	357.821	191.739	485.65	358.306	1659.84	454.933	103.661	32.6904	423.679
Prss12	27.7119	1.99641	0.573251	3.48261	0.000496559	0.00738263	61.2101	22.1133	28.9907	42.319	41.2306	46.5949	16.721	20.5797	8.23765	18.5207	29.7275	46.8036	9.96404	15.0751	7.58997
Itgb7	165.811	2.79656	0.803374	3.48101	0.000499519	0.0074189	466.535	140.303	188.029	454.824	97.3855	299.128	187.166	52.0986	30.0818	58.8783	199.617	191.102	31.0693	79.3872	11.5575
Chchd10	18.6999	3.62835	1.04321	3.47807	0.000505039	0.00748529	51.0084	12.6361	50.9837	35.736	6.55941	35.6897	26.1265	8.23189	5.49177	12.6721	21.097	7.96657	1.99281	4.30716	0
Grip1	22.6088	2.84592	0.818239	3.4781	0.000504982	0.00748529	14.4152	32.1119	6.18558	25.6073	55.5473	78.0967	8.43718	19.2934	20.0895	11.7969	9.66272	36.3038	3.36727	5.02459	13.1931
Emc3	2661.24	-0.416062	0.119642	-3.47757	0.000505975	0.00749137	2522.09	2650.05	2558.93	2024.88	2315.04	2515.51	2686.59	3042.22	2761.63	2470.72	2496.4	2727.38	2693.83	3170.93	3282.49
Sema3f	1156.71	-2.51816	0.724218	-3.47708	0.000506901	0.00749729	772.021	794.634	294.077	658.563	146.063	570.79	879.498	2693.86	376.486	1124.1	393.167	767.541	3952.48	3193.71	733.696
Csf1	15264.2	-1.0872	0.312708	-3.47674	0.000507554	0.00749918	10042.2	13606.8	10027.9	12074.5	8668.48	7787.11	12486.3	13845.1	29968.7	15612.8	15502.4	18724.3	16531	22527.3	21557.6
Scrn1	173.17	-2.19673	0.63205	-3.47556	0.000509797	0.00751104	76.6506	39.6723	132.88	85.1434	51.3272	145.591	91.8697	178.925	110.525	59.3245	154.704	182.778	630.166	543.303	114.692
Tcf7l1	966.036	-1.29477	0.372545	-3.47548	0.000509938	0.00751104	793.406	966.296	562.491	491.358	804.096	784.14	441.999	1257.51	1023.09	674.899	850.376	738.598	1261.5	2365.39	1475.39
Tcf7l2	697.138	-1.11933	0.322027	-3.47588	0.000509177	0.00751104	585.548	544.442	563.232	435.69	637.528	520.589	358.494	1075.27	682.459	663.828	429.936	498.13	1153.61	1150.95	1157.37
Edem3	1365.77	-1.2432	0.357802	-3.47455	0.000511702	0.00752925	777.117	1127.91	582.235	1023.06	1208.38	928.742	762.583	1466.57	1477.84	1762.45	841.137	1047.77	2991.71	2787.12	1701.97
Ahcy	7629.4	0.779266	0.224316	3.47397	0.000512822	0.00753796	9389.15	9762.52	9898.4	9117.82	9126.02	12737.7	4890.55	3451.43	3113.96	6992.92	9693.11	8215.85	6540.4	4711.37	6799.72
Dnajc1	1119.51	-0.531374	0.153082	-3.47117	0.000518197	0.00760129	958.04	1140.57	885.239	963.841	985.375	1090.62	1010.05	1109.84	1240.19	1145.43	901.992	969.491	1595.31	1488.4	1308.29
Zfp52	257.818	1.73261	0.499118	3.47135	0.000517849	0.00760129	226.477	257.988	427.863	463.628	413.243	285.518	156.759	58.6522	148.278	666.747	181.242	231.03	107.612	93.6807	148.547
Oas1b	70.058	-2.46886	0.711687	-3.46903	0.00052235	0.00765433	60.1654	74.2362	36.0936	17.5598	26.0668	17.6892	71.6735	133.147	68.8014	63.553	10.837	131.198	133.751	163.093	43.0044
D930048N14Rik	33.1555	1.59892	0.461199	3.46688	0.000526537	0.00770777	37.6388	31.6571	36.0644	45.0118	43.0569	60.3814	31.2626	31.9657	29.3513	53.4601	29.7906	18.9606	23.8456	15.107	9.77925
Chmp4c	379.217	1.69174	0.488194	3.4653	0.000529638	0.00773727	414.372	319.536	354.711	847.759	230.922	276.683	333.55	280.279	371.536	757.94	275.691	805.8	185.098	134.136	100.24
Glis3	1428.47	-2.28172	0.658408	-3.46551	0.000529232	0.00773727	547.403	1258.65	274.732	598.813	547.325	1007.33	456.174	2252.53	492.938	2100.54	691.95	726.066	4886.23	3552.91	2033.52
Khdrbs2	33.1954	2.73078	0.788113	3.46496	0.000530309	0.00773914	42.4725	16.8135	114.786	25.1422	67.8813	58.4405	5.64635	4.22698	5.70335	58.6501	11.073	64.3098	5.84733	4.84818	12.0898
Dhtkd1	184.911	0.709918	0.204956	3.46376	0.000532673	0.0077657	245.972	203.393	237.286	244.529	193.15	173.104	175.429	163.29	217.445	192.124	192.846	161.485	135.003	126.38	112.234
Exosc7	1120.07	0.822084	0.237414	3.46266	0.000534862	0.00778965	1263.76	1023.65	1532.64	1225.02	1007.61	1573.92	1690.17	1199.46	972.987	996.879	1083.01	1079	699.123	677.969	775.864
Tpcn2	275.621	-1.30978	0.378304	-3.46225	0.000535675	0.00779353	167.308	345.388	129.959	130.719	279.243	174.483	246.634	271.652	267.266	232.971	267.548	172.277	570.939	516.859	361.066
Kctd1	278.25	-1.13928	0.329176	-3.46102	0.000538141	0.00781346	180.871	226.405	227.997	142.103	223.225	214.503	268.716	423.005	199.425	222.204	260.618	308.129	565.803	425.494	285.25
Prkar1b	418.904	2.09583	0.605539	3.4611	0.000537969	0.00781346	499.114	347.733	619.642	321.666	1075.92	491.039	266.058	566.102	591.539	171.433	727.561	163.052	78.4463	147.136	217.127
Snrnp48	384.36	0.859981	0.248553	3.45995	0.000540276	0.00783648	591.138	392.103	536.797	447.829	289.333	487.307	329.806	274.238	352.893	369.266	554.325	465.885	213.898	230.434	230.154
Lsm14a	2563.29	-0.418386	0.120981	-3.45828	0.000543638	0.00787723	2124.32	2397.3	2044.64	2535.25	2381.6	2500.26	2297.63	2220.19	2712.1	2537.71	2215.26	2570.39	3170.33	3588.66	3153.7
Cdh3	2642.29	-2.07998	0.601778	-3.4564	0.00054745	0.00791981	2160.72	3718.19	1004.68	1400.29	794.626	1579.27	1157.93	2984.06	3841.49	638.478	1298.42	3099	4445.95	3041.93	8469.32
Oat	5551.97	-0.45921	0.132862	-3.45628	0.000547688	0.00791981	4509.14	5508.31	5233.33	4180.17	4765.88	4954.92	6230.65	6585.51	5626.32	5800.89	5367.26	5407.31	6955.89	6663.17	5490.8
Dhh	14.8922	5.17755	1.49936	3.45317	0.000554048	0.00798748	31.6252	6.31807	10.9965	42.319	23.4265	9.91381	62.7037	2.05797	7.32236	3.8991	4.79477	15.9331	0.996404	1.07679	0
Gna11	2645.8	-0.72062	0.208655	-3.45364	0.000553068	0.00798748	2315.58	2744.92	2226.71	2018.2	2429.73	1979.95	2417.29	2999.15	2430.85	2657.59	2144.73	2729.58	3438.11	4535.28	2619.35
Lrch1	216.94	-1.50876	0.436905	-3.4533	0.000553782	0.00798748	198.933	169.535	117.962	149.527	148.992	97.1553	198.562	284	102.513	220.299	122.746	317.667	382.619	500.707	242.879
Wisp1	4262.05	-1.93617	0.560936	-3.45168	0.0005571	0.00802337	1613.91	3966.43	2090.94	1711.36	2997	2383.36	2588.11	2880.86	8098.74	3835.88	1812.75	2812.04	4949.88	4502.32	17687.2
Map7d1	5113.01	-0.570286	0.165295	-3.45012	0.000560339	0.00806187	5162.58	4832.94	5165.25	3830.18	3831.02	4157.9	5121.2	4073.09	6212.92	5065	5668.52	6024.74	5181.75	6757.66	5610.36
Ctgf	18034.9	-1.5554	0.451007	-3.44873	0.000563219	0.00808232	12178.9	14893.7	16627.8	12396.3	11952.5	6931.98	19235.2	8287.26	15816.8	8486.12	19477	32299.7	17696.7	34298.8	39944.4
Dusp22	233.743	1.1275	0.326927	3.44879	0.000563096	0.00808232	335.034	270.837	467.664	218.72	304.839	229.477	311.184	149.686	199.074	174.803	302.588	197.806	122.18	105.592	116.666
Shank3	56.2612	2.61079	0.757052	3.44862	0.000563461	0.00808232	66.7305	59.8356	22.8326	248.635	66.5853	156.592	15.3547	32.3334	12.1163	13.0263	46.9643	26.262	54.8092	14.4118	7.42947
Hgs	2314.96	0.411635	0.119378	3.44816	0.000564419	0.00808407	2690.28	2326.93	2464.58	2545.62	2394.11	2854.96	2302.38	2114.33	2430.25	2034.51	2274.82	2431.49	1818.27	2006.13	2035.67
Lgr6	212.849	2.75862	0.80006	3.44802	0.000564717	0.00808407	300.493	126.681	137.939	435.89	95.0139	507.507	48.0671	28.9982	58.3843	800.101	293.003	205.313	4.43507	74.0627	76.8461
Foxd2	23.0221	-3.09213	0.897348	-3.44586	0.000569253	0.00813268	10.2017	6.31807	7.99745	4.70211	2.81118	15.8621	7.31543	28.8116	9.15295	32.1676	12.4664	8.96239	75.7267	110.909	11.9271
Tubd1	149.733	-0.693287	0.201179	-3.44612	0.000568706	0.00813268	144.216	131.807	177.688	121.811	112.397	107.282	191.398	173.961	142.017	126.636	113.633	150.207	177.144	185.103	190.697
BC017158	362.435	-0.718569	0.208687	-3.44328	0.000574702	0.0081941	312.961	352.066	390.316	278.411	307.279	274.461	397.171	385.668	372.053	360.638	259.508	330.458	598.266	461.378	355.893
Gpr180	922.331	-0.66766	0.193899	-3.44334	0.000574569	0.0081941	847.76	713.942	824.737	709.078	788.066	678.105	936.375	1225.52	792.645	969.902	1078.82	814.582	1190.7	1294.3	970.432
Lgalsl	943.634	-1.06792	0.310172	-3.44299	0.000575324	0.00819477	647.912	732.097	676.964	672.368	846.262	742.138	518.69	796.797	1375.62	752.944	832.81	820.734	1360.71	1243.68	2134.77
Erc2	105.793	1.87308	0.544394	3.44067	0.000580282	0.00825715	123.44	122.149	126.959	97.8039	110.573	187.371	190.201	98.7827	71.393	145.242	89.1826	115.515	11.9568	25.843	70.4783
Gm14288	13.1282	-7.02395	2.04226	-3.4393	0.000583228	0.0082908	0.586249	38.0715	2.58514	0	0	0	0.90083	31.0441	22.2561	0.280082	4.02202	13.6142	53.6328	0.309393	29.6201
Ttc23	364.363	-0.762673	0.221878	-3.43734	0.000587448	0.00834247	388.393	351.645	288.907	289.827	290.757	298.555	249.989	389.385	362.247	368.246	366.285	329.796	487.924	617.803	385.692
Nub1	2133.01	-0.471086	0.137076	-3.43669	0.000588877	0.00835444	2081.14	1913.32	2085.33	2004.04	1539.59	1886.6	2076.54	2493.23	2104.26	2046.05	2004.21	2233.63	2360.48	2792.12	2374.58
Hyal2	1639.27	0.578545	0.16839	3.43574	0.000590934	0.00837529	1687.51	1844.98	1436.04	1913.8	1713.2	2036.85	2354.2	2060.43	1593.72	1275.86	1492.33	1387.15	1181.93	1230.42	1380.57
4921507P07Rik	9.91916	3.26066	0.949641	3.43357	0.000595691	0.00843433	22.4437	11.5831	9.99681	11.2851	18.7412	9.91381	11.4957	6.17392	11.8988	7.7982	13.4253	9.95821	2.98921	0	1.08428
Col18a1	1261.52	2.15841	0.628804	3.43256	0.000597921	0.00844075	2585.25	1430.33	775.132	3500.17	962.011	1729.49	2505.57	1123.72	486.705	336.731	1197.04	903.692	547.185	561.773	278.016
Ethe1	642.748	0.829968	0.241786	3.43265	0.000597704	0.00844075	783.489	726.578	969.69	662.057	698.109	861.51	833.959	489.797	480.53	534.177	694.282	657.242	384.612	477.018	388.173
Spast	970.67	-0.458443	0.13355	-3.43275	0.000597492	0.00844075	872.244	791.865	853.727	955.469	953.926	767.329	753.489	988.856	842.986	1082.98	1009.78	1008.77	1248.49	1208.16	1221.99
Olr1	57.1432	4.20567	1.22593	3.43061	0.000602233	0.00849322	6.78402	17.3798	5.1705	34.8514	286.122	65.4504	28.5704	7.60296	256.587	22.3275	97.8567	6.68883	1.47244	2.38685	17.8959
Lgals8	1225.27	-0.65133	0.18997	-3.42859	0.000606728	0.00854815	1107.07	1234.63	809.22	1006.98	1120.93	880.048	1122.97	1382.64	1303.63	1336.17	1016.89	1332.83	1631.57	1659.16	1434.35
Tbc1d2	325.089	2.12758	0.62061	3.4282	0.000607599	0.00855198	432.479	434.949	447.434	754.233	294.295	234.428	627.254	292.007	142.034	142.476	154.83	626.368	124.791	84.1415	84.6085
Ocln	13.9443	4.22882	1.23374	3.42765	0.000608821	0.00856073	2.46754	8.70338	18.9369	8.74504	19.1127	56.339	9.89827	7.4417	52.0151	5.03546	11.8889	4.11534	0	2.22498	2.24046
Cd109	3678.59	-1.66371	0.485499	-3.42681	0.000610716	0.00857891	1611.93	2401.77	3781.82	1172.43	3619.86	1271.53	2759.41	3164.8	4441.09	6525.95	1969.46	3246.45	7623.05	5833.36	5755.95
Uchl1	1318.95	1.75159	0.5112	3.42642	0.000611587	0.00858268	2724.12	989.889	2312.86	1674.54	1450.53	1373.64	2355.43	696.398	1185.62	513.586	1848.96	1322.8	464.474	592.182	279.275
Vimp	769.134	-0.883657	0.258159	-3.42291	0.000619537	0.0086857	863.062	596.005	825.736	540.743	547.242	614.656	724.227	788.203	487.852	680.393	936.897	790.682	1009.36	1366.45	765.503
Cdkn2b	1310.4	0.948058	0.277094	3.42143	0.000622926	0.00870771	1876.09	1442.63	1203.62	1549.82	1933.15	1711.12	1230.04	949.754	1110.25	1220.42	1876.67	860.389	1027.29	722.526	942.241
Efemp2	6108.6	-1.09486	0.320002	-3.42143	0.000622939	0.00870771	4842.34	5520.39	4419.38	3451.45	4066.82	5088.85	5156.94	10371.1	4380.87	6625.91	5934.39	4843.04	10347	10504.2	6076.36
Trp53bp2	1326.13	0.669361	0.195622	3.42171	0.000622281	0.00870771	1462.17	1283.23	1149.65	1534.51	2409.66	1468.02	1155.03	1360.23	1398.98	1017.58	1128.95	1120.98	1171.51	1156.52	1074.99
Ccbl2	237.552	1.10272	0.322377	3.42059	0.000624856	0.0087089	306.711	258.877	353.666	356.494	253.384	200.895	294.694	236.215	241.031	203.606	330.848	149.398	116.31	104.613	156.536
Frat2	125.501	1.5153	0.442974	3.42074	0.0006245	0.0087089	138.743	163.217	170.945	171.157	113.384	214.138	154.669	86.4348	35.6965	164.737	175.488	119.499	59.7842	45.2252	69.394
St3gal3	738.555	-0.539765	0.157792	-3.42073	0.00062453	0.0087089	669.748	777.358	835.568	498.913	607.486	582.084	864.707	670.525	763.665	883.389	742.673	728.558	817.149	889.067	747.425
Sms	3142.73	0.876683	0.256454	3.41847	0.000629732	0.00876828	3748.21	2920.94	4608.26	3346.24	3277.83	4441.5	4149.9	2504.07	2655.55	2692.03	3522.76	3247.38	1734.51	1782.2	2509.61
Polm	586.067	0.860815	0.251853	3.41793	0.000630997	0.00877732	1051.47	831.093	573.335	725.545	538.131	707.608	391.297	443.926	391.862	808.135	723.845	519.293	387.797	394.53	303.147
Lrp10	2335.62	-0.528799	0.154741	-3.41731	0.000632427	0.00878864	2315.78	1848.04	2104.33	2303.09	1992.19	1818.19	2138.19	2447.96	1916.63	2557.81	2271.76	2499.51	2744.1	3371.43	2705.28
Asb16	11.865	3.43223	1.00477	3.41592	0.000635672	0.00882513	14.2824	13.6892	23.9923	11.2851	21.5523	12.888	11.4957	32.9276	8.23765	6.82343	11.5074	4.97911	0	3.23037	1.08428
Chrd	49.2797	-3.48113	1.01972	-3.41379	0.000640655	0.00887982	27.5573	13.6955	33.5678	13.172	15.9374	1.45039	32.4119	137.621	17.4489	59.4264	18.2285	30.4144	219.424	111.318	7.52207
Sox13	33.5963	2.33703	0.684601	3.41371	0.000640856	0.00887982	43.7255	42.1583	36.6633	117.06	16.7146	68.1661	15.2462	6.69296	21.6184	39.7832	15.4831	40.3707	17.6959	10.8115	11.7544
Dnajc18	708.455	-0.614084	0.179916	-3.41317	0.000642107	0.00888851	628.423	582.316	709.773	508.768	685.927	474.871	736.768	831.421	767.017	833.433	621.402	691.1	928.648	858.201	768.756
Agrn	3978.52	-1.39564	0.409107	-3.41142	0.000646257	0.00892992	3348.43	5998.58	3119.91	1973.21	1769.31	2187.1	5061.32	4063.64	4219.68	5608.45	1836.16	4891.58	5825.27	6996.33	2778.81
Gucy1b3	13.3337	-4.00341	1.17355	-3.41138	0.000646352	0.00892992	5.07204	7.10258	1.68572	5.55026	0.790059	2.50758	8.81119	4.33783	13.8908	3.28744	0	9.23564	14.6869	112.425	10.6236
Pced1b	24.7302	-2.89991	0.85046	-3.40982	0.000650062	0.00897249	25.5042	26.3253	24.992	9.40422	4.68529	4.9569	5.2253	30.8696	4.57647	38.991	43.1529	9.95821	44.8382	16.1518	81.3211
1110057K04Rik	1956.27	0.659895	0.193562	3.40923	0.000651474	0.00898328	2321.42	2451.21	1980.39	2102.72	1915.4	2384.04	2423.31	1530.59	1760.19	2275.3	2066.59	2080.41	1155.24	1315.11	1582.07
Pdgfrl	172.01	-2.1606	0.633991	-3.40793	0.000654573	0.0090173	82.2627	53.464	51.0305	45.1832	105.288	62.0773	69.3525	496.295	124.259	255.615	193.837	90.9915	249.455	478.796	222.237
Cers5	2698.8	-0.571947	0.167877	-3.40695	0.000656933	0.00904108	2378.26	2618.51	2732.24	2200.08	2342.09	1948.6	2456.19	3444.29	2601.36	2795.9	2472.4	2842.77	2689.66	3627.18	3332.48
Suds3	2796.81	-0.439411	0.128996	-3.40639	0.000658279	0.00905086	2626.14	2498.11	3065.61	2280.51	2195.03	2348.01	3436.1	3052.52	2705.64	2866.97	2847.72	2776.27	2776.4	3069.08	3408.05
C1ra	932.372	-1.69159	0.496699	-3.40566	0.000660044	0.00905766	641.686	687.617	228.927	257.676	406.683	551.208	971.907	2490.15	890.582	1317.9	1059.64	555.668	1757.66	1131.71	1036.57
Rfwd3	4225.94	0.468304	0.1375	3.40584	0.000659597	0.00905766	4303.07	4640.63	3396.92	5011.51	4921.43	4638.67	4169.79	4304.25	5060.66	3974.16	4462.01	3973.33	3512.32	3320.82	3699.57
Oas1a	379.931	-4.04672	1.18838	-3.40525	0.000661037	0.00906256	427.45	568.627	101.967	16.9276	73.0906	18.8362	441.016	864.348	288.318	337.272	3.83581	757.82	587.878	1028.33	183.244
Mfap3l	1417.7	1.73957	0.51096	3.40451	0.000662818	0.00907021	1494.67	2428.98	814.173	1630.44	4694.42	2051.67	784.848	510.214	1326.24	933.189	1069.81	1018.84	507.028	584.349	1416.68
Mtfp1	82.1715	1.37694	0.40448	3.40423	0.000663503	0.00907021	101.072	61.5523	145.592	106.908	76.1271	134.561	118.033	79.5175	97.9553	81.1227	70.3052	37.4907	34.5511	43.7395	44.0438
Socs2	368.154	-1.30223	0.382524	-3.40431	0.000663311	0.00907021	222.999	440.719	426.039	129.626	175.527	231.792	230.096	390.196	442.286	551.454	273.261	681.571	414.269	450.643	461.835
Fhod3	250.523	2.15429	0.63341	3.4011	0.000671154	0.00916601	253.002	212.708	397.873	178.68	880.835	247.845	229.913	108.044	316.692	373.339	120.828	144.394	108.608	47.3787	137.704
C1qtnf3	25.9442	-3.84102	1.12968	-3.40008	0.00067365	0.00919129	4.38548	57.0475	18.9757	5.35526	7.04937	1.06543	15.1046	2.9298	23.5282	12.5711	5.46079	41.7393	9.63748	123.555	60.7583
Pcolce	17633.8	-0.936556	0.275576	-3.39854	0.000677476	0.00923466	17611	12014.8	14536.2	10843.2	10248.1	14364.7	17195	30896.5	14035	17800.9	20394.9	16705.3	22019.2	25666.9	20174.4
Bpnt1	1539.15	0.556806	0.163869	3.39788	0.000679105	0.00924749	1599.02	1743.21	1365.8	1992.74	1462.48	2078.51	1711.34	1654.62	1667.98	1311.97	1387.73	1347.9	1102.61	1222.67	1438.7
Nme4	669.767	0.933291	0.274689	3.39763	0.000679714	0.00924749	925.164	596.121	826.278	696.249	780.063	921.119	892.29	576.185	699.088	486.381	847.798	544.182	365.533	370.01	520.045
Cdh5	10.3009	4.69523	1.38205	3.3973	0.000680549	0.00925002	7.14118	9.47711	14.9952	33.8552	44.0417	4.9569	6.27037	1.02899	13.7294	0.974776	3.83581	10.954	0	0	3.25284
Pbxip1	1608.04	-0.878481	0.258665	-3.39622	0.000683245	0.00927533	1374.8	1658.12	1001.28	1052.29	1582.62	1059.26	1454.8	2183.73	2055.72	1031.33	1402.63	1472.87	2239.91	2621.2	1930
Rgs7bp	10.7448	4.36661	1.2858	3.39603	0.000683712	0.00927533	11.2218	5.26506	18.9939	23.5105	37.4823	3.96552	6.27037	2.05797	22.8824	13.6469	5.75372	6.97075	0.996404	2.15358	0
Gm2427	9.02215	-16.477	4.85661	-3.3927	0.000692076	0.00937456	0	87.4	0	0	0	0	45.9827	0	0	1.94955	0	0	0	0	0
Iqsec1	1436.92	-1.3713	0.404203	-3.39259	0.000692342	0.00937456	738.069	1213.8	320.197	1047.5	1046.54	1033.26	800.224	1656.25	1355.83	1990.42	1077.14	1184.19	3041.79	2467.19	2581.4
Sema6d	282.935	2.42439	0.714756	3.39191	0.000694078	0.00938915	170.655	717.604	138.06	464.726	753.391	199.622	376.204	154.336	103.192	519.318	91.0807	291.645	77.6148	78.5781	107.994
Ahrr	215.749	-3.56079	1.05062	-3.38924	0.000700877	0.00945862	41.3168	124.728	262.756	54.5682	32.11	43.7182	192.979	541.221	93.5886	170.099	10.7865	127.525	970.424	559.221	11.1923
Btbd11	806.413	1.81747	0.536313	3.38883	0.000701926	0.00945862	1136.15	672.616	987.566	1762.37	1435.49	1088.83	991.544	680.075	189.792	603.442	503.734	830.351	381.18	677.568	155.481
Camkk2	993.431	-0.846008	0.24966	-3.38864	0.000702404	0.00945862	739.622	724.472	684.781	847.32	765.577	589.872	1128.67	1559.94	989.434	1135.61	854.427	922.13	1515.53	1543.04	901.038
Plekhf1	769.231	-1.21595	0.358749	-3.38941	0.000700422	0.00945862	523.346	433.841	473.849	485.258	508.823	617.63	531.936	1296.52	476.869	880.222	773.875	792.674	1326.21	1635.64	781.767
Prkag2	892.887	-0.569963	0.168201	-3.38859	0.000702531	0.00945862	579.06	776.612	729.505	680.083	689.336	779.662	1008.1	862.372	1218.68	980.669	901.051	998.903	945.37	1127.06	1116.84
Epn2	1441.86	0.721568	0.212977	3.38801	0.000704025	0.0094698	1290.02	1433.02	913.696	1636.71	1618.03	2320.64	1370.11	1323.41	1497.06	1747.2	1818.46	1278.31	1132.7	1141.43	1107.09
Bex4	16.3796	3.98319	1.1771	3.3839	0.000714637	0.00960349	46.9277	13.6892	25.9917	33.8552	19.6782	13.8793	42.8475	9.26088	29.2894	0	0.958953	4.97911	0	0	4.33713
Pdpn	5573.83	1.32809	0.392636	3.38251	0.000718267	0.0096341	4818.88	3582.08	4910.47	6503.66	9768.3	5908.08	9344.27	3160.37	8556.25	5244.92	8879.53	4096.42	2788.8	2331.48	3713.95
Ugp2	2444.86	-1.20056	0.354912	-3.3827	0.00071777	0.0096341	2296.69	1414.2	2073	1794.87	1435.09	1527.53	1544.92	3954.67	1421.28	2970.21	2794.78	2511.65	3538.15	4613.63	2782.22
Nkx3-2	95.7938	-6.30202	1.86379	-3.3813	0.000721442	0.00966759	17.3429	4.21205	5.99808	7.52337	0	6.93967	12.5407	131.71	0.915295	86.755	9.58953	12.9457	519.126	621.308	0
Iqgap3	3145.9	-0.5375	0.159011	-3.38027	0.000724146	0.00969472	3034.79	2983.91	2219.19	2631.17	2733.24	2809.52	3027	2943.17	3236.49	3577.89	2988.42	3139.5	3983.26	4558.83	3322.05
Tmem59	5975.97	-0.492254	0.145804	-3.37613	0.00073512	0.00982318	5027.89	5948.56	6650.49	4454.27	4979.3	5045.88	6088.59	5874.39	6402.42	7314.43	5520.47	5965.46	6597.16	7404.37	6365.91
Xaf1	320.83	-2.99051	0.885772	-3.37616	0.000735058	0.00982318	347.861	406.948	141.674	34.0278	104.327	46.7302	321.885	676.784	182.618	365.132	15.6731	702.803	418.394	884.973	162.618
2020-03-03	100.187	-1.47565	0.437305	-3.37442	0.000739716	0.00987535	47.4983	89.5689	48.4969	56.7339	37.7143	47.1375	69.8961	241.402	114.102	141.998	107.718	106.964	122.493	152.18	118.899
Ccdc51	311.774	0.741505	0.219818	3.37327	0.000742809	0.00989811	308.091	336.964	411.868	285.888	315.789	439.182	434.745	303.551	340.49	276.836	279.055	321.65	191.309	206.744	224.446
Igf1r	3716.53	-0.694641	0.205914	-3.37345	0.000742322	0.00989811	3096.21	3921.42	2862.09	2677.38	3541.14	2789.75	3243.87	3508.84	4866.62	3592.05	3095.5	3973.33	5122.51	5276.27	4180.99
Smpd1	1334.82	-0.873829	0.259235	-3.3708	0.0007495	0.00997794	1032.41	1276.25	1161.63	846.38	1194.75	1088.54	1254.07	1633	1187.14	1201.9	1135.4	1275.65	1825.41	2677.98	1231.74
Arhgef10	1229.42	-0.748471	0.222078	-3.37031	0.000750829	0.0099863	1052.22	952.968	632.792	962.202	1174.34	897.464	1205.16	1740.73	1335.13	1304.22	1093.91	992.612	1895.74	1591.51	1610.35
Ajuba	2413.44	-0.945165	0.280666	-3.36758	0.000758299	0.0100763	1833.24	1960.71	1159.63	2803.4	1407.46	1737.89	2101.62	2598.19	2055.75	2532.47	1828.72	2728.55	3902.91	4198.4	3352.6
Ikbip	2135.98	-0.840468	0.249601	-3.36724	0.000759246	0.0100794	1441.02	2021.44	1752.2	1598.85	2408.85	1287.16	1558.65	2324.77	2208.38	2289.85	1804.03	1862.05	3329.63	3407.35	2745.4
Asap2	595.352	0.944288	0.28053	3.36609	0.000762431	0.0101031	640.325	868.086	433.978	852.797	968.526	639.549	654.53	371.107	535.276	594.904	551.216	541.197	444.235	470.492	364.065
Fam174a	253.602	-0.906904	0.269424	-3.36608	0.000762445	0.0101031	213.366	212.802	249.671	186.272	135.821	215.778	250.522	360.717	209.32	324.08	192.369	245.243	339.744	357.839	310.482
Plekha4	15.6634	-7.09676	2.10943	-3.3643	0.000767369	0.0101495	0	0	0	0	0	0	32.3969	107.015	6.40706	0	0	16.929	26.9029	34.4573	10.8428
Trim62	46.098	-1.57007	0.466664	-3.36445	0.000766953	0.0101495	51.373	37.3324	22.782	33.4286	21.2808	28.3878	31.421	37.7671	40.7492	51.5649	47.8792	40.8182	85.5948	124.691	36.401
Erbb2ip	3739.78	-1.17601	0.349836	-3.36161	0.000774888	0.010221	1981.88	2540.22	2032.56	3340.36	3390.05	2800.72	1306.31	2902.32	3562.29	5148.42	2503.46	3052.47	8946.35	6963.56	5625.78
Igf1	118.858	-2.03501	0.605315	-3.36191	0.000774066	0.010221	80.3004	27.6468	22.429	27.1645	30.629	101.094	116.516	240.23	202.79	138.929	87.5981	67.9683	152.613	147.388	339.579
Mlec	10185.6	-0.650743	0.193584	-3.36156	0.000775049	0.010221	7295.92	9724.4	5491.4	9171.33	8653.95	8642.1	10496.6	12601.7	11743.8	10644.2	8308.96	8456.26	14516.4	13830	13206.7
Rgs5	52.6216	3.62399	1.07814	3.36134	0.000775642	0.010221	153.723	9.11911	32.0781	18.7314	30.0253	407.218	13.4363	25.842	10.3044	20.2598	20.1629	11.211	11.5946	20.9226	4.69495
Zscan21	403.124	-0.748459	0.222731	-3.36038	0.000778367	0.0102474	317.395	347.844	299.044	295.61	321.446	367.772	351.532	559.874	395.639	399.273	365.976	371.291	570.069	668.647	415.448
Samd9l	592.54	-2.28805	0.681262	-3.35854	0.000783546	0.0103061	465.197	561.256	304.903	120.374	493.83	120.948	262.31	377.638	512.565	922.138	104.526	1051.59	1368.06	1559.19	663.58
Frat1	21.0531	1.95889	0.583427	3.35756	0.000786331	0.0103332	22.4437	20.0072	29.9904	39.4977	17.8041	40.6466	22.9913	11.3188	11.8988	29.2433	25.8917	18.9206	8.96763	12.9215	3.25284
Rbm47	186.505	1.24311	0.370272	3.35729	0.000787091	0.0103336	285.28	271.96	192.46	199.1	124.342	352.334	186.288	168.034	205.099	210.021	180.494	136.072	73.3878	86.0808	126.626
Gas2	489.764	-1.27282	0.379582	-3.3532	0.00079882	0.010478	499.449	340.421	239.191	341.414	383.971	454.217	373.392	545.04	284.957	241.847	505.983	286.863	1331.03	875.123	643.562
Phlda3	1006.69	-1.2168	0.362911	-3.35288	0.000799753	0.0104806	886.686	548.62	1335.41	547.694	525.228	692.759	722.528	1661.66	797.794	982.02	1039.48	1256.49	1310.12	1720.25	1073.6
Stxbp2	468.82	1.45534	0.434106	3.35249	0.000800892	0.0104859	566.263	441.079	261.273	885.978	544.299	617.133	717.437	525.76	244.492	287.057	671.604	523.534	225.746	332.748	187.901
Cox18	570.4	-0.702714	0.209629	-3.35218	0.000801782	0.0104879	533.806	592.2	723.864	400.029	326.017	453.59	678.417	586.257	472.12	567.479	647.963	654.148	515.693	729.579	674.841
Mafk	887.146	-0.72341	0.215832	-3.35173	0.000803097	0.0104955	692.633	713.355	794.152	894.632	503.627	662.627	1111.39	823.64	841.841	976.798	877.129	1012.18	1001.88	1299.62	1101.67
Fbxo7	401.187	-0.569711	0.16999	-3.35144	0.000803916	0.0104966	477.889	360.078	410.325	298.829	314.601	359.688	397.146	415.442	403.524	330.547	369.769	438.09	475.524	539.994	426.364
Ctdsp2	10190.9	-1.03198	0.308032	-3.35025	0.000807392	0.0105131	7101.92	11320.2	6031.77	5757.46	9252.78	8252.81	8215.16	12532.6	9484.93	11689.3	6342.35	9313.01	18202.7	17210.4	12155.7
H2-DMb1	26.2984	-2.44371	0.729368	-3.35045	0.000806792	0.0105131	35.9069	17.6104	13.0033	6.43455	19.947	9.21093	18.0797	7.8228	6.26262	5.43399	30.2432	27.7566	63.4795	97.018	36.2667
Nutf2-ps1	1571.44	1.05513	0.314932	3.35035	0.000807085	0.0105131	2464.73	1082.5	2662.15	1594.96	1427.14	2084.87	1792.28	1792.49	1322.6	1344.22	2048.32	1497.71	789.152	959.42	709.12
Gnb2	10912.7	-0.563402	0.16821	-3.3494	0.000809866	0.0105356	10149	9460.27	13058.6	8403.16	8923.82	9131.58	12434.9	13012.9	9551.45	10076.7	9686.57	10703.1	11687.5	15045.3	12366.3
Aff1	3120.18	-1.25041	0.373509	-3.34775	0.000814717	0.0105713	1891.12	3098.04	1351.33	2127.33	2870.04	1621.89	1980.43	2862.25	5110.61	3246.7	1967.9	2926.86	4917.62	5156.78	5673.86
Mppe1	189.963	-1.37175	0.409708	-3.34811	0.000813657	0.0105713	113.239	147.422	182.942	63.0083	175.23	72.3708	196.471	213	224.247	341.171	141.925	174.269	277.997	272.428	253.722
Paqr8	397.878	-1.07139	0.320061	-3.34746	0.000815571	0.0105713	264.772	431.292	256.149	275.847	435.061	201.41	296.92	376.321	424.357	359.788	330.759	399.021	840.465	498.726	577.277
Tmem168	1056.06	-0.709209	0.211859	-3.34756	0.000815273	0.0105713	804.719	1015.65	1036.39	690.93	1099.19	776.022	944.586	960.358	1279.11	1060.17	945.842	1030.56	1481.57	1172.93	1542.88
Crabp1	18376.4	2.8317	0.846683	3.34447	0.000824411	0.0106665	26257.1	35001.1	50366.9	19625.7	37731.6	16851.5	20501	7537.32	22230.7	3430.24	13407.1	12281.5	174.371	1413.82	8835.81
Farsa	3598.75	0.611234	0.182759	3.34449	0.000824342	0.0106665	3845.16	3644.85	3880.17	3934.48	4705.85	4036.03	4097.47	3723.68	3190.13	2879.46	4150.68	3594.08	2224.2	2824.45	3250.57
Slc30a1	182.341	-0.738552	0.220899	-3.34339	0.000827608	0.0106981	155.066	137.945	192.938	166.455	100.265	136.811	201.697	171.841	216.925	189.106	187.955	205.139	245.115	217.512	210.351
Fbxo31	643.665	0.677207	0.202605	3.3425	0.000830287	0.0107133	657.742	663.271	929.414	713.081	652.312	854.43	559.116	731.809	506.676	710.973	713.049	575.508	458.66	445.141	483.795
Kif26b	849.599	-2.52453	0.755236	-3.3427	0.000829673	0.0107133	152.929	388.329	83.5376	94.9158	396.493	613.823	212.982	1663.67	1618.42	402.992	513.711	243.537	825.801	2110.88	3421.96
Fam76a	997.92	-0.808981	0.24208	-3.34179	0.000832404	0.0107309	718.312	1122.55	984.028	622.795	931.586	719.035	897.678	968.739	1254.52	1059.34	760.612	946.492	1468.52	1460.96	1053.64
Ptgis	512.064	4.62956	1.38668	3.3386	0.000842019	0.0108451	313.564	58.8837	79.6894	105.175	4325.37	284.263	213.815	41.5454	457.376	115.976	1445.71	49.1411	21.3389	107.615	61.4944
Mmd	1789.09	1.42336	0.426901	3.33418	0.000855519	0.011009	2040.2	1880.76	2965.67	1885.11	3028.73	1752.72	1797.14	1212.11	2204.26	1170.45	3377.09	1036.41	638.045	778.541	1069.16
Ulk1	1016.68	-0.521827	0.156553	-3.33323	0.000858429	0.0110365	828.376	882.424	651.792	967.694	921.129	895.217	977.132	924.03	1238.39	1035.21	1046.22	885.285	1367.07	1283.53	1346.68
Syde1	3448.4	-0.506815	0.152209	-3.32973	0.00086931	0.0111663	3383.9	3433.87	2738.13	2820.33	3533.65	2451.68	3329.56	3395.65	3332.59	3671	3572.1	3550.1	3715.59	4375	4422.78
Snx32	71.3243	-1.20986	0.363393	-3.32934	0.00087052	0.0111718	71.4118	55.8097	76.9754	43.2594	40.2935	44.6121	51.208	71	80.5459	110.15	77.6752	50.7869	125.547	104.449	66.1412
Spop	4427.7	0.399371	0.119982	3.32859	0.000872877	0.0111877	5040.18	4361.81	4162.24	4596.13	5301.2	4681.99	4444.57	4088.9	4879.88	4550.42	4797.34	4456.2	3389.27	3968.91	3696.51
Urgcp	1478.51	0.35455	0.106521	3.32844	0.000873326	0.0111877	1717.11	1792.07	1636.75	1566.42	1510	1543.45	1115.89	1186.49	1358.38	1711	1822.37	1603.75	1280.77	1195.21	1137.94
Nmi	184.868	-1.20131	0.360953	-3.32818	0.000874157	0.0111883	218.914	165.157	167.051	83.4981	140.909	103.792	259.936	205.964	156.534	153.918	135.081	227.199	260.585	351.986	142.498
Epn3	88.7869	-4.48962	1.35243	-3.31966	0.000901275	0.011525	18.6924	11.5751	12.5797	23.6679	2.1992	14.532	11.4855	209.665	1.04707	33.1031	54.2534	32.8348	417.33	487.566	1.27236
Ccr1	5.87759	5.04048	1.51949	3.31723	0.000909152	0.0116082	11.2218	4.21205	6.99777	8.4638	4.68529	5.94829	12.5407	1.02899	1.83059	8.77298	11.5074	10.954	0	0	0
Prkab2	557.944	-1.11159	0.335105	-3.31715	0.000909407	0.0116082	437.472	430.147	353.217	332.015	562.669	350.285	432.522	631.145	411.519	780.745	424.486	532.722	1157.01	993.905	539.299
Thop1	3356.21	0.544068	0.164057	3.31632	0.000912102	0.0116322	3953.69	3701.32	3334.63	4363.71	3415.38	3466.31	3555.22	3318.53	3599.81	2971.05	3365.95	3583.47	2110.98	2533.08	3069.99
Kif7	336.95	-0.824648	0.248853	-3.3138	0.000920371	0.0117271	251.399	250.036	209.136	194.352	234.389	376.963	324.781	435.802	389.202	308.848	319.225	334.244	569.693	445.088	411.096
Lnx2	391.5	-0.782111	0.236076	-3.31296	0.000923128	0.0117517	290.326	310.286	217.487	389.977	302.784	282.133	390.881	518.736	424.21	467.63	287.852	312.63	500.318	595.368	581.878
Mccc1	603.047	0.692309	0.209128	3.31046	0.000931425	0.0118425	714.118	554.937	483.845	808.763	787.129	645.389	521.485	585.493	771.593	629.705	631.95	523.802	411.515	449.021	526.961
Myh1	16.1348	-7.66637	2.3159	-3.31031	0.000931921	0.0118425	1.43871	0	0.704911	0.663126	0	0	0	13.2669	9.21946	0	0	30.8963	17.565	166.738	1.52913
Gm9913	90.3856	-1.48981	0.450142	-3.30964	0.000934148	0.0118541	65.2907	71.6048	59.9808	75.2337	37.4823	64.4398	56.4333	137.884	64.9859	77.0073	55.6193	92.6114	224.191	187.361	85.6582
Lancl3	405.393	1.54411	0.466563	3.30954	0.000934491	0.0118541	341.756	661.292	193.938	752.337	753.395	471.897	310.383	216.087	554.669	484.463	281.932	380.404	162.414	183.054	332.874
Bmi1	2231.32	-0.879918	0.266069	-3.3071	0.000942662	0.0119471	1264.19	2130.33	2023.46	1900.48	1967.89	1844.9	1527.97	1851.82	2303.28	2547.28	1505.31	2088.92	4229.97	2660.56	3623.48
Erp29	2987.05	-0.653429	0.197653	-3.30594	0.000946595	0.0119863	2678.59	2304.61	2976.94	2318.76	2109.21	2451.23	4011.94	4006.06	2510.2	2570.53	3017.41	3029.93	3547.57	4100.23	3172.48
Serpinb1a	90.4735	-2.81511	0.851655	-3.30546	0.000948217	0.0119962	23.3459	22.9271	22.0179	14.9798	20.0241	20.4346	32.6957	617.547	28.4984	38.6081	60.5412	64.9233	166.415	139.395	84.7493
Ccdc22	1462.38	0.697642	0.211111	3.30462	0.00095106	0.0120215	1718.22	1557.36	1812.68	1800.6	1700.71	1571.74	1937.37	1091.85	1329.74	1143.43	1608.08	1535.72	978.743	1038.84	1110.6
Nrbf2	314.31	-0.467435	0.141461	-3.30435	0.000951971	0.0120223	292.357	334.666	357.196	265.123	290.313	234.196	296.506	297.141	282.011	319.079	348.265	305.163	344.188	371.671	376.772
Golt1b	2887.29	-0.716248	0.216818	-3.30345	0.000955045	0.0120505	2491.17	3395.69	2592.99	1571.25	2430.56	2664.12	2722.9	3462.48	3347.27	2767.56	2341.69	2571.34	3574.04	3183.01	4193.3
Perm1	76.8231	1.14204	0.345777	3.30283	0.000957155	0.0120664	108.138	91.6121	63.9796	110.029	128.377	72.3708	61.6586	37.0435	73.2236	98.4523	71.9215	94.603	45.8346	45.2252	49.877
Acp5	12.0834	3.42207	1.03662	3.30119	0.000962755	0.0120811	15.3442	20.0617	9.0216	11.3158	42.9606	13.8329	0	4.12713	5.50672	13.3701	16.3466	22.9662	0.999115	5.39861	0
Gm8024	20.3447	4.24412	1.28543	3.30171	0.000960969	0.0120811	147.924	20.0072	17.9943	26.3318	3.74823	29.7414	17.766	12.3478	1.83059	7.7982	10.5485	5.97493	0.996404	1.07679	1.08428
Pltp	289.694	-2.1879	0.662615	-3.30191	0.000960277	0.0120811	163.195	240.863	151.934	131.289	79.963	173.189	162.581	946.687	183.764	60.4694	118.527	181.789	551.735	976.621	222.803
Rhoj	1487.09	-1.01634	0.307851	-3.30142	0.000961969	0.0120811	1054.17	1624.96	1136.08	668.62	1501.76	973.558	1481.42	1687.34	1685.46	1530.86	1386.59	1214.71	2919.18	1894.14	1547.52
Vldlr	433.555	-1.47521	0.446802	-3.30172	0.00096094	0.0120811	347.574	222.62	213.455	330.712	291.066	318.089	182.288	624.991	212.031	426.516	407.288	313.697	1254.06	879.588	479.349
Zfp36l2	10238.2	-0.507812	0.153836	-3.301	0.000963401	0.0120811	9680.37	8889.53	7748.53	9242.47	8749.32	9931.65	8683.41	10551.2	7240.9	11335.7	11838.3	9978.13	14059.3	12792.3	12852
Gatm	101.562	3.80021	1.15134	3.30068	0.000964517	0.0120844	239.528	295.344	133.244	352.179	10.7055	41.5289	64.6715	13.715	207.013	3.71212	34.6927	97.9594	2.84586	13.327	12.9638
Gm14057	92.9973	1.70431	0.51642	3.30024	0.000966007	0.0120925	113.239	91.6121	176.943	133.54	88.0835	100.129	205.877	56.5942	92.4448	71.1586	74.7983	91.6155	19.9281	22.6126	56.3826
Cadm3	75.2643	3.63464	1.10273	3.29605	0.000980557	0.0122638	94.0433	89.7661	51.7192	25.7004	139.734	138.072	26.0651	40.6868	217.209	7.17294	257.729	15.9666	6.27512	11.996	6.82856
Chsy3	11.4663	-4.12359	1.25225	-3.29296	0.000991395	0.0123885	5.10084	2.10602	2.99904	1.88084	1.87412	0.991381	2.09012	10.2899	29.2894	1.94955	13.4253	16.929	2.98921	22.6126	57.4669
Ifi44	132.476	-3.88272	1.17953	-3.29176	0.000995631	0.0124306	79.8116	250.86	15.2136	5.94848	27.2702	19.6607	94.2171	267.873	34.122	172.821	9.67058	230.969	360.453	411.823	6.42836
Irx1	1101.99	-1.77655	0.53979	-3.29119	0.000997639	0.0124447	717.178	1338.38	1616.48	250.152	704.668	240.906	1181.96	1234.78	2392.58	937.734	480.435	1337.39	987.436	780.672	2329.04
Nup88	4377.38	0.713707	0.217083	3.28772	0.00101002	0.0125713	5191.03	4026.67	6259.12	5651.89	4130.23	5708.74	4198.2	3691.01	4701.23	3901.38	4444.09	4311.52	2762.44	2707.53	3975.58
Rtn2	86.8241	1.26635	0.385188	3.28761	0.00101043	0.0125713	146.598	120.808	138.017	75.3354	104.547	131.077	100.278	37.1688	57.1044	99.8559	79.7774	83.4538	53.9733	45.6806	28.6865
Tmem129	958.18	-0.440424	0.133958	-3.28777	0.00100983	0.0125713	750.302	841.779	748.869	884.598	891.621	942.785	797.217	1044.66	1011.5	993.494	842.48	933.535	1161.21	1327.27	1201.37
Gfpt2	323.557	1.43923	0.437982	3.28606	0.00101601	0.0126297	303.025	295.867	293.877	367.668	294.207	535.353	425.297	452.708	535.394	189.122	584.991	134.458	161.401	129.202	150.787
0610037L13Rik	707.673	-0.812419	0.247276	-3.28547	0.00101811	0.0126448	564.672	668.303	943.554	501.305	416.944	575.586	918.246	907.707	571.151	637.714	636.969	651.971	1037.26	827.457	756.265
Itga4	627.097	4.38031	1.33346	3.28492	0.00102011	0.0126476	132.689	768.017	996.106	123.611	3844.88	93.7999	302.374	103.428	2421.55	88.9608	51.4697	284.498	49.1134	74.7073	71.2599
Rhpn1	43.6378	1.7287	0.526241	3.285	0.00101983	0.0126476	48.3587	41.0924	81.1711	74.1728	38.9972	83.1841	60.5377	31.7418	69.7181	9.95546	31.3945	25.0023	22.1838	13.8675	23.1891
Hps4	566.028	-0.790338	0.240746	-3.28287	0.00102757	0.012729	532.143	437.869	566.197	445.095	438.85	378.268	800.64	581.959	695.885	442.927	492.21	491.236	465.275	915.263	806.598
Gfra1	617.998	1.6383	0.499213	3.28178	0.00103156	0.0127602	720.473	1278.66	473.759	1038.77	531.726	1022.38	904.702	602.54	435.29	592.984	185.63	650.679	357.924	166.882	307.562
Prelp	11.2414	-3.02058	0.920434	-3.28169	0.00103187	0.0127602	1.65413	4.67342	3.24183	1.52483	4.1588	5.6261	2.54174	15.0159	7.42044	5.53186	17.8811	8.8392	44.2219	36.6647	9.6244
Ggact	337.845	-0.678896	0.206902	-3.28125	0.00103349	0.012769	328.096	272.722	304.53	323.64	212.056	248.635	361.694	386.898	283.227	412.203	309.271	367.954	395.805	464.42	396.524
Figf	1014.1	-0.98624	0.300594	-3.28097	0.00103451	0.0127706	709.884	875.834	765.919	616.185	664.888	676.462	877.047	2224.07	1201.81	909.585	1080.64	731.341	1471.76	1020.74	1385.27
Tapbp	2456.33	-1.41936	0.432725	-3.28004	0.00103791	0.0128015	2058.97	2422.24	979.829	1432.96	1784.21	1541.51	2059.21	4017.82	1615.22	2185.82	1793.77	2225.4	4764.85	6053.87	1909.35
Arhgef7	2314.22	0.685588	0.209054	3.27948	0.00103997	0.0128159	2321.46	2657.87	1973.49	3127.28	3579.54	2448.84	2214.65	2061.44	2975	1752.49	2204.13	1704.29	1794.87	1724.25	2173.77
Prcp	483.279	-1.05937	0.323192	-3.27782	0.00104611	0.0128803	375.422	495.969	325.896	441.998	343.9	363.837	357.411	569.029	479.614	417.204	336.593	346.546	1037.26	949.728	408.774
Ccdc43	1133.54	0.404056	0.123337	3.27603	0.00105277	0.0129512	1211.83	1191.31	1366.57	1280.04	1113.12	1173.52	1198.84	1289.06	1206.45	1046.12	1020.22	1210.4	857.205	838.226	1000.26
Ldlrad3	604.444	-0.639039	0.195256	-3.27283	0.00106476	0.0130874	426.849	392.61	414.196	584.467	545.516	589.493	450.492	733.872	681.772	452.056	611.004	506.862	940.258	783.325	953.894
Fam180a	24.2585	-1.69956	0.519409	-3.27211	0.00106749	0.0131071	17.3429	14.7422	13.9955	15.9872	21.5523	5.94829	16.721	25.7247	40.273	10.7225	17.2612	21.9081	49.8202	40.918	50.9612
Flt3	6.90932	4.31959	1.3202	3.27192	0.00106821	0.0131071	4.00918	5.2931	7.78822	51.8183	4.66069	8.27863	7.12314	2.96976	4.4762	0	1.84509	2.07893	0	1.12398	2.17461
B3gnt2	247.929	-1.38752	0.42431	-3.27007	0.00107522	0.0131819	127.16	216.506	122.882	297.748	105.72	131.971	199.253	258.438	305.734	182.233	139.27	234.078	591.586	274.964	531.396
Dhfr	2313.62	0.589499	0.180356	3.26853	0.00108107	0.0132421	2476.97	2400.87	2469.21	2499.64	2408.24	3058.41	1957.4	1892.31	2537.2	2295.6	2624.65	2789.29	1493.61	1636.72	2164.23
Lamb1	20115.8	0.997772	0.305291	3.26826	0.00108209	0.0132433	22233.3	22372.2	18784.3	25672.8	26479.2	24690.2	24257.3	16257.2	26705.5	13368.2	22392.2	20043.3	9055.59	9637.42	19788.3
Ssc5d	515.448	-2.16751	0.664196	-3.26337	0.00110097	0.0134629	346.857	291.684	114.963	158.931	301.733	241.897	194.381	1596.99	247.13	378.213	446.872	255.926	1419.88	1198.47	537.804
Gm14446	18.0714	-2.07921	0.63759	-3.26104	0.00111004	0.0135505	10.2091	15.8067	14.0058	7.52888	10.3152	4.96053	13.5957	19.565	15.5714	31.2156	5.75793	25.9103	29.914	43.1031	23.6111
Slc6a9	680.47	-1.20914	0.37076	-3.26123	0.0011093	0.0135505	666.787	536.648	441.024	626.35	450.115	522.375	376.883	658.168	373.601	560.917	761.802	536.194	1987.5	1051.6	657.084
Os9	1653.45	-0.739625	0.227014	-3.25806	0.00112175	0.0136817	1835.09	1656.79	1502.88	1130.55	1376.02	1310.63	1686.74	1931.53	1344.72	1645.34	1286.64	1721.29	2212.02	2671.46	1490.09
Chfr	553.514	-0.810206	0.24872	-3.2575	0.001124	0.0136974	528.49	368.605	526.461	461.678	426.833	448.067	507.824	629.55	368.283	713.91	488.155	490.911	647.082	916.33	780.524
Tmem64	1304.62	-0.830816	0.255165	-3.25599	0.00112999	0.0137586	816.134	1149.89	943.699	1136.03	1073.87	1342.33	802.607	1021.78	1501.08	1391.98	1090.33	981.88	2532.86	2085.74	1699.07
Spon2	35.1985	-4.39163	1.34954	-3.25417	0.00113724	0.0138351	0	0	0	0	10.3076	5.94829	9.40555	123.478	3.66118	8.77298	16.3022	8.96239	190.313	139.983	10.8428
Nfix	7886.26	-1.19775	0.36848	-3.25052	0.00115193	0.0140019	4719.8	5815.96	2859.53	6084.15	8174.59	4802.27	5011.63	10347.6	6659.39	8179.97	6978.43	4938.4	18630.8	16335.3	8756.1
Bst2	2736.59	-2.22952	0.686507	-3.24763	0.00116371	0.014121	3243.11	3523.38	2056.34	505.007	1090.74	810.95	3938.83	4592.37	1319.86	3101.74	465.092	5114.54	3380.8	6611.49	1294.63
Plod1	1777.85	-1.0788	0.33218	-3.24764	0.00116367	0.014121	1253.9	1867.16	1286.4	993.965	1032.86	938.645	1333.87	2315.87	2563.12	3302.89	1959.59	1556.05	2639.61	2189.82	1434.07
5430435G22Rik	150.722	2.7572	0.849146	3.24702	0.00116619	0.0141362	190.972	147.94	45.9899	115.302	612.236	168.368	119.848	179.916	162.241	126.24	243.616	15.2708	16.5493	28.7765	87.5657
Fstl1	27217.7	-0.793707	0.244492	-3.24635	0.00116893	0.0141362	21665	28157.8	16170.8	26069	19917.8	21726.9	26702	30163.5	23245.8	22578.3	29627.1	24858.1	43815.3	45665.3	27902.4
Map3k5	225.539	1.62437	0.500335	3.24656	0.00116809	0.0141362	360.149	174.662	212.146	410.527	175.383	463.036	184.967	198.513	50.0281	360.921	198.211	254.551	96.1137	125.337	118.535
Sf3b4	5088.79	0.557906	0.171845	3.24657	0.00116805	0.0141362	6370.83	5391.97	6326.9	5630.05	5437.99	6539.78	5039.03	4576.54	4419	3914.6	5332.46	5391.37	3252.87	4296.15	4412.32
Anapc7	1847.93	-0.431088	0.132934	-3.24288	0.00118329	0.0141895	1852.44	1468.09	1820.87	1430.39	1551.31	1676.21	2132.18	2156.39	1958.47	1909.81	1749.51	1733.96	2170.83	2268.78	1839.72
Fam184a	19.6003	4.2853	1.32111	3.24372	0.00117981	0.0141895	8.42889	6.68316	7.17311	27.2906	6.855	114.703	3.54937	2.87403	67.0597	8.30411	10.4352	22.7762	0.799881	4.19326	2.87909
Frs2	2894.41	-1.00681	0.310434	-3.24324	0.00118177	0.0141895	2017.89	3147.45	1636.48	2219.4	2321.09	2163.19	1805.87	2929.52	3136.72	3998.53	1808.59	2760.42	4233.72	4638.81	4598.44
Gm9531	4316.83	0.585064	0.180373	3.24364	0.00118015	0.0141895	4530.46	4615	3835.9	5131.2	4019.34	6189.79	4867.23	3771.94	4679.25	4138.51	4408.55	4339.08	3174.24	3119.02	3932.87
Hspa4l	377.911	1.1617	0.358215	3.24303	0.00118265	0.0141895	328.494	375.925	256.918	701.555	595.032	379.699	500.584	209.913	280.995	468.867	411.391	410.278	345.752	167.979	235.289
Mrps6	3338.27	1.0298	0.317463	3.24385	0.00117925	0.0141895	4492.53	4669.86	4301.75	3603.43	4363.46	4239.01	3847.74	2510.66	3036.98	1442.77	4196.01	3391.51	1671.42	1886.75	2420.19
Ndp	47.2782	4.48445	1.38201	3.24488	0.00117501	0.0141895	171.388	14.7422	32.9895	7.52337	204.279	2.97414	95.1006	25.7247	127.226	0	8.63058	8.96239	0.996404	5.38395	3.25284
Pcdh10	147.273	-5.05315	1.55798	-3.2434	0.00118113	0.0141895	43.7615	10.7512	683.668	11.9103	2.44303	7.06694	168.926	234.889	61.4108	237.466	17.15	23.84	575.744	128.323	1.75304
Sec31a	8734.73	-0.468197	0.144352	-3.24344	0.00118094	0.0141895	9594.26	6943.13	8297.24	7257.32	7516.49	6878.46	9806.14	9295.87	8942.32	7825.4	10307.5	8402.56	9639.27	10483	9832.02
Wdr92	727.957	0.592842	0.182775	3.24356	0.00118047	0.0141895	834.697	776.616	906.039	854.195	661.087	823.537	778.668	656.357	848.402	628.318	862.872	737.492	455.719	494.239	601.125
Fam229b	98.0483	-0.972405	0.300031	-3.24101	0.00119107	0.0142708	98.2788	72.0172	122.412	72.7326	52.4764	51.6766	105.285	167.587	124.184	78.5456	84.8461	93.5889	95.5065	142.955	108.634
BC023829	1347.83	-1.23674	0.381744	-3.23971	0.00119652	0.0143126	851.641	1571.66	810.852	960.296	901.026	759.06	1166.56	1135.02	825.595	2730.62	999.409	1330.66	2543.74	2281.65	1349.61
Zfp661	117.914	0.809717	0.249936	3.2397	0.00119657	0.0143126	109.25	134.843	97.3717	130.715	146.583	139.475	122.598	122.078	161.36	133.12	121.824	111.87	76.4455	58.7448	102.438
Pcdhb3	10.0443	-3.25158	1.00443	-3.23726	0.00120685	0.0144235	6.12101	7.37109	4.9984	1.88084	3.74823	3.96552	4.18024	5.14493	4.57647	0	14.3843	2.98746	20.9245	13.9983	56.3826
Ptms	1663.01	-0.829314	0.256203	-3.23694	0.00120817	0.0144272	1647.78	1543.66	1831.74	1012.01	1338.94	1200.36	2315.61	1764.94	1173.79	1577.12	1600.85	1628.13	1971.74	2754.77	1583.72
Isoc1	1045.65	-0.66216	0.204599	-3.23638	0.00121058	0.0144439	857.961	990.885	976.688	897.162	856.471	716.768	1232.13	1190.54	1307.96	1202.87	710.584	835.494	1507.56	1094.02	1307.64
1500015O10Rik	20.1087	-6.01154	1.85775	-3.23593	0.00121248	0.0144482	3.0605	0	0	1.88084	0	1.98276	0	27.7826	1.83059	2.92433	8.63058	4.97911	95.6547	152.904	0
Lif	1547.99	1.58338	0.489365	3.23558	0.00121398	0.0144482	3376.31	2028.8	1580.51	3250.62	723.367	2174.61	1803.21	1049.71	678.035	1361.71	2076.99	1064.33	579.581	665.046	807.085
Six5	265.841	-1.24262	0.384039	-3.23566	0.00121361	0.0144482	214.235	222.186	150.952	106.268	271.747	180.431	219.463	383.812	198.619	247.593	261.794	209.122	488.238	561.007	272.155
Ptpn11	8494.9	-0.61087	0.188963	-3.23275	0.00122606	0.0145798	6178.01	8185.12	5090.01	7958.61	7551.98	6858.5	8028.43	8167.49	10581.7	9262.36	7255.48	8143.98	11425.5	10746.3	11990
Trim30a	148.077	-3.29086	1.01899	-3.22952	0.00123999	0.0147331	100.428	202.567	46.9483	6.79467	60.3976	11.6396	121.871	204.454	214.34	173.431	5.19642	311.724	259.86	449.292	52.2101
Npas4	78.7073	-1.73459	0.537415	-3.22765	0.00124812	0.0148173	65.2907	44.2265	72.9767	26.3318	100.265	15.8621	73.1543	45.2754	42.1036	74.0829	76.7162	69.7075	174.371	170.133	130.114
Scube3	128.274	-3.78063	1.17161	-3.22688	0.0012515	0.0148451	12.4927	8.1531	7.66425	28.9247	27.2	38.9133	11.7695	388.814	6.55812	18.6013	52.5504	15.4206	438.449	852.244	16.36
Slc16a13	167.697	2.84865	0.883218	3.22531	0.00125837	0.0149143	227.892	197.722	86.5096	308.756	253.95	458.297	259.696	147.234	108.395	15.2162	172.999	135.943	17.9282	120.27	4.64509
Ttyh3	3502.69	-1.11349	0.345271	-3.22498	0.00125981	0.0149189	2679.98	2691.5	1212.61	2375.51	2869.27	2890.87	2720.29	5315.74	3478.12	2849.27	3938.42	1915.96	6617.12	5958.95	5026.73
Vash1	15.74	2.65952	0.82495	3.22385	0.0012648	0.0149656	21.4235	5.26506	14.9952	17.868	53.4123	15.8621	15.6759	7.2029	21.9671	13.6469	24.9328	9.95821	1.99281	4.30716	7.58997
Fam181b	32.9271	4.68502	1.45378	3.22265	0.00127011	0.0149911	98.9563	14.7422	21.993	88.3997	0	72.3708	40.7574	18.5218	0.915295	55.5622	5.75372	69.7075	2.98921	2.15358	1.08428
Kat2a	3424.85	0.503779	0.156323	3.22268	0.00126997	0.0149911	4080.83	3434.02	3518.98	4268.93	3257.93	3944.52	3602.65	3767.72	3349.89	2829.23	3895.57	3331.79	2456.07	2738.11	2896.44
Zfp277	826.375	0.682194	0.211675	3.22284	0.00126924	0.0149911	937.404	786.702	1163.93	1008.98	858.854	1065.98	954.19	636.651	675.565	702.554	845.719	931.05	659.873	624.872	543.292
Slc25a31	14.601	-15.6435	4.85661	-3.22108	0.00127708	0.0150609	0	0	217.93	0	0	0	0	0	0	0	0	0	0	0	1.08428
Mast1	16.0334	2.54994	0.791806	3.22042	0.00128005	0.0150834	30.2909	31.9848	13.8057	40.3644	17.2371	22.4582	16.1812	2.70402	9.62103	7.68469	19.715	14.8289	6.9824	0.943214	5.69866
Dkk3	1600.31	2.26203	0.702476	3.22008	0.00128156	0.0150887	1936.28	1617.43	648.793	698.733	3089.48	3208.11	660.479	4326.89	1489.18	2640.67	1388.56	841.469	582.896	692.376	183.244
Mfge8	8432.98	-1.14987	0.357128	-3.21976	0.001283	0.0150932	7525.69	6329.61	8586.03	6284.8	4654.9	6675.19	11150.2	8377.78	5211.07	6905.91	5417.6	10289.6	10763.6	19838.6	8484.11
Tesk1	1025.99	-0.670188	0.208206	-3.21886	0.001287	0.0151278	908.571	844.628	866.759	910.29	736.302	969.349	1120.41	1082.91	836.618	1076.22	933.645	941.765	1587.07	1597.37	977.865
Ctif	972.805	-0.785571	0.244109	-3.21812	0.00129035	0.0151422	638.625	823.456	677.784	789.014	994.219	558.147	983.402	1049.57	944.584	1343.24	908.128	845.452	1448.77	1474.13	1113.56
Fbxl7	228.511	-3.38189	1.05087	-3.21818	0.00129008	0.0151422	65.2907	279.048	232.926	24.451	63.72	77.3277	97.1907	84.3769	388.085	18.5207	280.014	91.6155	14.9461	433.946	1276.2
Nuak2	345.144	-1.37043	0.426011	-3.2169	0.00129584	0.0151942	288.128	276.302	209.111	337.251	60.862	249.361	333.913	425.384	426.565	269.586	306.23	321.729	532.14	531.854	608.745
Gstt1	305.488	-2.57181	0.79959	-3.21641	0.00129807	0.0152078	94.809	107.252	57.3244	66.6181	152.962	69.5904	96.0892	1190.74	132.495	385.492	371.484	138.018	536.352	1003.18	179.916
1810043G02Rik	359.906	-0.465871	0.144941	-3.21422	0.00130798	0.0152737	367.872	324.333	439.236	326.942	303.298	307.833	309.806	343.938	353.519	348.352	343.474	332.879	409.669	417.5	469.944
Apobr	303.423	1.3178	0.409971	3.21437	0.00130733	0.0152737	571.382	388.058	485.735	285.234	723.294	285.47	310.858	207.957	235.441	130.213	127.412	280.825	154.246	157.403	207.817
Carns1	38.716	-1.92807	0.599828	-3.21437	0.00130732	0.0152737	26.5244	18.9542	25.9917	26.3318	20.6153	23.7931	27.1716	37.0435	20.1365	27.2937	24.9328	32.8621	109.604	142.136	17.3485
CARNS1	38.716	-1.92807	0.599828	-3.21437	0.00130732	0.0152737	26.5244	18.9542	25.9917	26.3318	20.6153	23.7931	27.1716	37.0435	20.1365	27.2937	24.9328	32.8621	109.604	142.136	17.3485
Ntrk3	39.0138	-5.18399	1.61337	-3.21314	0.00131292	0.0153188	3.33555	2.29529	2.7238	0.512468	0.510635	3.55535	0	397.959	3.71994	2.12475	9.73425	5.75243	3.80082	55.1911	93.9918
Fam171a1	3411.06	0.883265	0.274975	3.21217	0.00131737	0.0153582	3130.4	3896.96	3158.72	3547.7	5477.76	4888.65	3093.91	2209.64	3897.98	2801.66	4186.29	3332.89	2535.87	1804.98	3202.48
Pawr	747.592	-1.07074	0.333381	-3.21177	0.00131921	0.015367	446.834	282.207	348.889	687.448	493.83	776.251	477.593	864.348	461.309	502.984	799.767	960.967	1469.7	1650.72	991.033
Plbd2	2383.8	-0.811472	0.252704	-3.21116	0.00132201	0.0153871	1935.71	2066.94	1545.77	1689.84	2091.98	1830.87	2024.81	3296.48	2216.03	3088.25	2167.43	1952.32	3673.03	3704.55	2472.97
Lgr5	39.4109	-2.93053	0.912997	-3.20979	0.00132831	0.0154478	6.89264	9.47689	7.82075	15.2214	18.4831	7.26134	7.85679	118.283	45.8662	13.2081	13.0171	14.289	14.6414	65.2914	233.555
Sirt6	473.072	-0.398546	0.124183	-3.20934	0.00133042	0.0154598	507.357	495.205	509.738	391.283	415.737	418.377	477.389	465.224	424.11	449.455	445.516	480.622	475.547	608.968	531.554
Ppif	1203.03	0.784908	0.244714	3.20745	0.00133915	0.0155485	1627.4	1264.06	1564.31	1494.99	1157.63	1478.68	1541.96	1128.99	921.063	916.095	1312.49	1239.69	758.026	639.926	1000.06
Ahdc1	1072.74	-0.923739	0.288052	-3.20685	0.00134198	0.0155687	605.677	967.845	496.484	969.644	943.553	871.638	841.876	1080.43	1168.47	940.026	1028.03	893.685	2283.24	1894.4	1106.06
Mxd3	508.363	-0.652946	0.203646	-3.20628	0.00134462	0.0155866	414.728	437.025	574.729	324.731	460.04	434.358	547.343	547.47	538.789	545.981	521.593	362.44	632.162	630.671	653.391
Mt3	7.47771	5.30266	1.65404	3.20588	0.00134649	0.0155956	26.5244	4.21205	12.9959	9.40422	6.55941	6.93967	24.0364	3.08696	1.83059	0.974776	8.63058	6.97075	0	0	0
Carm1	6779.73	0.453638	0.141546	3.20489	0.00135115	0.0156309	6391.76	7149.59	5510.3	7493.73	7185.69	8974.31	7471.63	6679.26	7123.88	6522.17	7264.23	6658.18	6493.08	5525.18	5252.89
Pld3	1567.75	-0.721665	0.225185	-3.20477	0.00135173	0.0156309	1689.02	1570.97	1644.05	1082.52	1273.97	1021.96	1571.9	2129.84	1340.76	1808.15	1352.95	1458.43	1819.69	2343.38	1408.61
Recql	999.033	-0.738108	0.230413	-3.20341	0.00135811	0.015692	923.957	1166.58	946.833	669.836	794.585	690.319	1333.21	1238.51	836.132	1121.51	660.175	1009.88	1269.87	1204.05	1120.05
Pard3b	100.596	-1.45984	0.455749	-3.20317	0.00135925	0.0156924	65.9492	54.4572	36.2977	71.8945	99.3274	48.9012	68.7357	140.708	120.046	89.868	33.8722	73.7342	257.477	227.821	119.849
Gabarapl2	1793.4	0.679489	0.212204	3.20206	0.0013645	0.0157404	2224.67	1839.51	2558.42	2154.17	1926.53	1758.21	2237.99	1725.89	1504.75	1391.59	1872.64	2060.3	1039.38	1343.51	1263.45
Mrps9	1436.93	0.693098	0.216687	3.19862	0.00138087	0.0159163	1691.62	1496.84	2173.46	1552.67	1298.31	1909.9	1761.8	1307.02	1428.53	1178.2	1453.76	1357.13	918.283	837.283	1189.13
Atg5	1140.09	-0.450912	0.140989	-3.1982	0.00138287	0.0159265	1049.75	1113.03	1337.57	973.337	996.093	867.458	1030.43	1057.8	1185.31	1238.94	1061.56	1311.5	1200.67	1279.23	1398.72
Nckap1l	11.0508	3.43256	1.07446	3.19468	0.00139986	0.0161091	20.4034	9.47711	5.99808	20.6893	13.1188	23.7931	8.36049	4.11594	17.3906	20.4703	10.5485	5.97493	0	0	5.42141
Id3	4439.16	-1.58837	0.497312	-3.19391	0.0014036	0.0161261	4498.73	5581.62	4440.09	3268.51	610.337	2309.1	3555.08	5068.73	2397.37	4192.6	4666.9	7390.42	4565.47	9795.55	4246.89
Prdx2	10245	0.769829	0.24102	3.19405	0.00140292	0.0161261	11889.6	10096.1	12263	9616.26	14341.7	11739.5	12388.8	11624.9	8377.12	8030.75	13346.5	9024.25	5695.46	7419.95	7820.9
Slc25a24	5437.09	0.714993	0.223902	3.19333	0.00140641	0.0161454	5280.72	6447.26	5860.17	6705.36	7754.66	5450.34	5761.63	4435.9	5771.1	5470.45	4769.55	5719.03	3394.38	3243.69	5492.14
Acta2	74412.1	-1.195	0.37442	-3.1916	0.00141487	0.0162294	56450	69428.3	73967.4	34111	71885.5	24802.4	80956.7	40942.3	84502.8	74539.1	91572.3	113565	87039.8	125493	86924.7
Lims1	3799.04	-0.879479	0.275603	-3.19111	0.00141726	0.0162438	2504.19	3850.09	2557.82	3520.9	3757.6	2063.29	2535.47	3465.27	3939.39	4531.79	3019.11	4054.13	6479.72	5140.53	5566.24
Mmab	408.212	-0.966295	0.302865	-3.19052	0.00142017	0.0162556	331.974	163.37	270.799	289.501	287.388	258.428	481.411	724.544	462.71	573.413	328.095	319.319	533.82	574.553	523.862
Tusc1	151.238	-1.43977	0.451277	-3.19044	0.00142057	0.0162556	145.884	116.884	185.941	103.446	71.2164	88.2329	184.976	174.928	82.3765	140.368	89.1826	172.277	355.716	253.046	104.091
Sugp1	1421.07	0.477827	0.149813	3.18948	0.0014253	0.0162967	1537.39	1385.76	1478.53	1567.68	1778.54	1510.86	1581.18	1502.32	1472.71	1138.54	1526.65	1347.35	1013.34	1120.94	1354.27
Arhgap24	969.076	-1.14206	0.358582	-3.18494	0.00144782	0.0165409	565.462	807.108	635.878	688.742	652.673	726.484	948.443	801.638	868.328	1565.3	574.136	1138	1151.53	2356.5	1055.92
Odc1	16288.5	0.908048	0.285172	3.18421	0.0014515	0.0165696	14293.6	23466.4	20150.6	20429.7	22032.1	17212.4	23553.6	12586.6	18357.2	10400.9	11547.7	18495.4	8929.77	10991.9	11879.4
Mkrn2	1162.81	-0.397182	0.124746	-3.18394	0.00145287	0.0165721	1029.35	1087.76	1195.62	887.758	1053.25	1010.22	1168.38	1434.41	1160.59	1230.17	1195.81	1102.37	1295.32	1292.15	1298.97
Nop10	1809.74	0.788481	0.247799	3.18194	0.00146294	0.0166735	1973	1820.66	2554.18	1973	1860.06	2773.88	1913.51	1727.67	1387.59	1279.88	2166.27	1891.06	1066.15	1302.92	1456.19
Glt1d1	229.98	2.09643	0.659494	3.17885	0.00147863	0.0168389	274.687	244.459	257.526	372.757	108.77	417.798	240.224	360.073	95.5744	352.777	257.06	255.925	11.5658	124.989	75.5154
Ldlrad4	495.571	-0.98674	0.310534	-3.17756	0.00148522	0.0169005	345.837	477.015	325.896	394.977	373.886	321.207	416.979	485.681	725.829	584.865	331.798	488.948	572.932	576.082	1011.63
Loxl3	4417.05	-1.47712	0.464969	-3.17683	0.00148896	0.0169295	3485.11	7542.16	2917.65	1038.08	3424.02	2139.35	3950.2	4300.23	6075.88	5614.54	2095.21	5296.25	5998.12	5240.36	7138.59
Trim21	96.2912	-1.56875	0.493884	-3.17636	0.00149138	0.0169435	126.447	101.282	74.5813	47.5577	68.9202	30.8094	77.9611	136.44	99.5571	83.127	39.9373	120.467	142.274	219.745	75.2607
Capg	3023.09	0.909553	0.286521	3.17447	0.00150111	0.0170176	4560.54	3357.25	4529.65	2416.55	4546.91	2840.82	3323.42	3011.62	2028.87	2288.19	3806.27	3417.06	1846.26	1894.1	1478.83
D430019H16Rik	13.9334	4.60571	1.45091	3.17435	0.00150171	0.0170176	9.18151	23.1663	1.99936	27.2722	34.6712	15.8621	4.18024	12.3478	14.6447	1.94955	58.4961	1.99164	0	2.15358	1.08428
Hmox2	1415.49	0.616933	0.194344	3.17443	0.00150131	0.0170176	1706.83	1570.37	1540.02	1772.23	1553.53	1471.2	1732.75	1439.5	1226.12	1037.63	1663.95	1390.79	1142.25	1053.22	931.912
Nudt11	8.04259	5.29811	1.66914	3.17417	0.00150268	0.0170176	8.16134	5.26506	31.9898	16.9276	0.937059	4.9569	3.13518	11.3188	19.2212	3.8991	2.87686	11.9499	0	0	0
Irf6	6.29164	4.01194	1.26467	3.17232	0.00151225	0.0171124	4.92205	0	3.21547	23.0409	9.79564	21.9733	1.68072	13.5274	2.94404	2.35152	3.86729	3.20305	0.801231	0.865872	2.18616
Cyb561	35.6157	2.55994	0.807059	3.17194	0.00151424	0.0171214	111.666	34.2369	40.3501	50.613	74.8755	22.6749	20.3668	36.6544	26.8524	25.8774	41.1334	21.0063	14.2862	12.8873	0.754683
Gm12396	11.105	-6.90477	2.1771	-3.17155	0.00151627	0.0171308	3.0605	0	0	0	0	0	0	42.1884	0	12.6721	35.4813	9.95821	18.9317	24.7662	19.5171
Gfm1	3383.69	0.656285	0.206996	3.17052	0.00152164	0.0171778	3405.51	3544.15	2918.58	5491.83	3176.79	3888.93	3854.9	2976.62	3574.36	3543.54	3158.21	3253.42	2391.5	2458.84	3118.15
Inpp4b	40.4854	3.11244	0.981967	3.1696	0.00152647	0.0172187	117.465	36.4611	11.6366	196.262	48.611	61.8313	12.5345	13.096	28.5165	2.3383	25.3038	18.3027	5.52414	25.9972	3.40087
Prrg4	93.0899	2.57431	0.812278	3.16925	0.00152832	0.0172259	60.8909	126.448	22.1349	197.444	315.746	57.2638	58.3523	21.7932	166.471	77.2207	67.3921	129.374	19.1847	15.0467	61.5861
Slc7a5	6400.16	-0.580519	0.183191	-3.16893	0.00153002	0.0172314	5864.32	6269.49	4697.14	6986.36	5903.98	5213.88	5880.11	5521.55	5474.05	5581.66	5203.45	6334.25	11061.4	8615.28	7395.41
Tab2	4626.38	-0.669649	0.211366	-3.16819	0.00153389	0.0172614	4299.8	4589.71	3211.23	4366.69	4583.7	3223.7	3265.11	3638.38	4263.3	5537.91	4093.16	4957.47	7733.44	5908.06	5724.08
Snai1	1221.2	-0.973913	0.307681	-3.16533	0.00154907	0.0174048	831.437	999.309	931.702	1002.49	840.541	1096.47	767.075	1738.99	907.057	1379.31	1225.54	824.54	1753.67	2429.24	1590.64
Ydjc	158.427	1.34868	0.426079	3.16533	0.00154907	0.0174048	241.78	207.443	313.9	239.808	168.671	160.604	203.787	88.4928	176.652	68.2343	140.966	142.402	53.8058	52.7627	117.102
Cbfa2t3	7.00267	4.06038	1.2829	3.16501	0.00155079	0.0174103	6.43554	2.9917	4.72973	18.9328	21.2981	19.9588	0.590552	2.92344	1.03444	0	2.70946	20.0482	1.68917	1.69818	0
Tec	86.3403	-2.19579	0.693971	-3.16409	0.00155569	0.0174517	44.2277	24.2048	99.1448	21.7168	19.8808	61.1873	95.4572	70.7058	76.1292	80.0958	55.6682	176.487	143.26	280.543	46.3965
Gab1	466.026	-0.962777	0.304403	-3.16284	0.00156241	0.017472	345.837	391.721	279.911	297.173	511.634	365.82	307.248	590.638	423.781	420.128	350.018	417.249	938.612	836.666	513.949
Pcbd1	11.014	3.68553	1.16522	3.16295	0.00156178	0.017472	10.2017	4.21205	1.99936	15.9872	16.8671	35.6897	4.18024	3.08696	2.74588	28.2685	32.6044	3.98328	0	5.38395	0
Pim2	199.407	0.808063	0.255456	3.16322	0.00156036	0.017472	249.479	232.227	187.545	232.316	186.924	287.723	219.45	141.711	143.913	225.702	270.332	209.897	115.095	156.597	132.194
2020-09-09	5676.86	0.671042	0.212159	3.16291	0.001562	0.017472	5914.43	5923.07	6765.74	5919.35	7458.03	6386.51	5380.85	5817.29	9085.66	4536.75	5178.16	4374.25	3582.65	3876.01	4954.11
Atp11a	4234.93	-1.07602	0.340324	-3.16176	0.00156821	0.0175231	2581.31	3956.79	2595.87	3126.32	3166.96	2360.01	3689.85	4837.73	4253.12	6178.93	2824.16	5709.64	8837.83	5536.82	3868.63
Gpr155	71.2289	-1.82603	0.577667	-3.16104	0.00157205	0.0175523	14.7843	46.9109	47.8376	25.9774	31.4783	73.516	34.7317	94.8137	34.6435	92.4684	41.6914	74.722	124.53	191.592	138.737
Slc29a3	662.042	-0.914996	0.289623	-3.15926	0.00158169	0.0176461	519.716	644.506	331.186	520.181	633.311	436.345	472.986	841.621	778.774	735.099	498.564	520.337	1029.06	1055.71	913.235
Prokr2	23.4331	2.3423	0.741661	3.15817	0.00158761	0.0176983	42.9942	41.5675	15.6826	19.5431	42.3393	22.1249	8.02828	21.3836	19.1629	12.1468	27.423	62.4417	3.17724	7.76716	5.71452
Arhgef25	2083.29	-0.778245	0.246444	-3.1579	0.00158912	0.0177013	2020.42	2056.53	2132.07	1147.81	2089.95	1490.27	2098.94	2452.61	1561.16	2126.52	1698.82	2265.51	2855.47	3105.73	2147.57
2020-09-08	2195.19	-0.974052	0.308526	-3.15712	0.00159337	0.0177348	1709.2	1746.3	1059.87	1849.01	1888.96	1744.21	1347.04	2727.9	2390.87	2578.35	1561.83	1555.61	4474.16	3495.63	2798.93
Asna1	4206.91	0.641532	0.203262	3.15618	0.00159849	0.0177728	4095.97	4177.3	5047.39	4752.89	5381.53	4637.68	5112.44	4385.54	4356.8	3212.86	4126.37	4346.76	2521.9	2789.96	4158.22
Hcn2	38.7362	-1.35929	0.430694	-3.15604	0.00159928	0.0177728	29.4272	27.2085	23.8423	28.9707	24.2111	31.5257	14.5393	42.4022	20.7445	37.7784	43.8359	39.5837	92.0859	81.3241	43.5637
Slc30a4	2815.64	1.19162	0.377657	3.1553	0.00160333	0.0177901	3555.91	2894.66	2674.29	5732.1	6250.68	3847.62	1440.52	1580.28	921.457	2181.34	2181.75	2043.59	3432.81	2571.67	925.895
Tox	209.825	-4.19607	1.32978	-3.15546	0.00160246	0.0177901	24.2913	34.443	99.2778	4.44727	9.14235	84.3887	84.0159	591.368	23.1241	153.934	17.4998	186.056	678.529	1094.5	62.3653
Med16	1093.9	-0.702187	0.222562	-3.15501	0.00160491	0.0177938	1048.58	1030.82	901.637	962.05	1007.24	729.91	842.84	1387.23	989.25	1137.56	967.835	1012.13	1501.85	1738.28	1151.29
Aacs	2843.07	-0.399192	0.126575	-3.15381	0.00161153	0.0178521	2281.65	3090.64	2483.76	2423.47	2615.69	2463.16	2948.11	3100.3	3395.54	2587.34	2530.11	2831.98	3196.08	3385.29	3312.89
Gm14137	96.8735	1.90174	0.603038	3.15361	0.00161267	0.0178521	178.529	64.2338	194.938	224.761	59.9717	157.63	59.5685	86.4348	22.8824	98.4523	76.7162	110.536	28.8957	63.5306	26.0228
Fancl	257.491	-0.642284	0.203694	-3.15317	0.00161505	0.0178646	303.112	201.3	352.503	190.621	193.751	196.719	295.355	246.424	279.761	228.256	244.01	223.704	285.131	295.941	325.781
Nr2f1	846.759	1.86422	0.591378	3.15234	0.00161968	0.0178923	1436.97	522.875	1197.14	999.595	1027.21	1451.91	795.293	632.936	642.168	1221.07	944.941	873.687	357.605	555.619	42.357
Rsl1d1	8590.18	0.71265	0.226075	3.15227	0.00162007	0.0178923	10154.5	9352.07	11721.5	10903.7	8349.35	9440.28	9691	6678.24	8120.48	6326.84	10072.2	10533.8	5560.5	5071.29	6876.98
Actg2	841.665	-3.77098	1.1967	-3.15116	0.00162624	0.0179466	110.035	215.275	134.521	18.346	319.693	60.4098	430.203	281.554	3638.51	144.167	783.951	1049.11	222.665	1560.39	3656.14
Gnal	100.337	-1.24278	0.394534	-3.14998	0.0016328	0.018005	69.5226	61.2079	135.251	35.8139	73.2499	43.7158	131.967	125.81	105.488	165.096	86.4939	109.775	126.819	137.05	97.7981
Tgfb1i1	3533.55	-0.974698	0.309526	-3.149	0.00163829	0.0180516	3134.51	3020.18	3845.13	1842.35	3929.13	2229.34	2856.28	3033.98	2799.75	2738.64	3517.03	4333.19	5045.55	7146.36	3531.84
Mfap5	173.5	-2.80067	0.889619	-3.14817	0.00164296	0.018089	60.1672	42.2636	84.6434	41.3188	84.2531	42.9174	205.986	302.207	52.5124	101.298	174.846	234.198	391.061	774.229	10.5966
Clgn	16.5213	2.25146	0.715349	3.14736	0.00164753	0.0180974	23.0694	21.7362	14.2335	12.6021	27.6527	20.5564	39.6282	13.7161	29.8237	4.89843	15.2599	11.7991	4.42725	4.78443	3.63248
Map3k9	30.7075	3.34015	1.06111	3.1478	0.00164505	0.0180974	63.2504	14.7422	27.9911	74.2933	26.2376	79.3105	99.2808	10.2899	7.32236	6.82343	13.4253	19.9164	7.97123	0	9.75853
Tcf19	2083.11	-0.518656	0.16479	-3.14738	0.00164743	0.0180974	1759.37	1942.07	1995.51	1494.66	1953.23	1859.4	1911.55	2106.69	2479.35	1710.21	2182.47	2248.85	2421.6	2811.34	2370.4
Wdr3	3781.73	0.896805	0.285067	3.14595	0.00165551	0.0181711	4727.74	4069.12	5606.95	4133.65	3648.62	5543.5	4613.02	2294.87	3569	3082.85	3813.95	4465.88	1786.97	2398.18	2971.7
Cercam	493.563	-1.48699	0.472957	-3.14402	0.00166642	0.0182493	383.479	344.49	285.011	159.847	399.774	356.414	452.36	664.563	319.17	729.084	316.854	425.942	1114.44	1102.24	349.776
Pop1	3149.1	0.667429	0.212259	3.1444	0.00166427	0.0182493	3701.42	3666.47	3697.13	4042.72	2967.54	3653.23	3358.12	2433.34	3226.86	2976.29	3608.16	3188.93	1650.29	2194.04	2871.93
Rnf217	1124.08	-0.604466	0.192259	-3.14401	0.00166647	0.0182493	958.958	1222.55	1377.56	1004.37	906.136	800.044	886.212	1103.07	795.391	1354.94	1022.24	1308.51	1507.56	1329.84	1283.79
Mmp1b	13.0231	4.24119	1.34915	3.14361	0.0016688	0.0182607	2.04034	37.9084	19.9936	12.2255	38.4194	8.92243	28.2166	2.05797	10.9835	11.6973	4.79477	14.9373	0.996404	2.15358	0
Mrps5	1992.11	0.479644	0.15261	3.14295	0.00167256	0.0182668	1912.68	2156.75	2214.66	2142.6	2069.81	2600.84	2346.03	1997.92	2085.65	1731.69	1730.34	2006.25	1442.08	1529	1915.31
Pigw	267.682	0.625812	0.199123	3.14284	0.0016732	0.0182668	280.85	262.535	299.343	331.15	308.289	345.272	320.99	222.162	305.834	207.953	202.112	290.508	204.883	203.423	229.92
Smarcc1	6883.74	0.517537	0.164671	3.14286	0.00167309	0.0182668	7289.1	7059.39	5711.18	8261.61	7610.79	8390.06	7847.36	6333.41	8211.11	6341.89	7286.12	5964.97	5199.23	5045.84	6704.11
Ackr1	6.41479	5.72025	1.82042	3.14226	0.00167647	0.0182779	14.2	7.31631	8.11981	0	15.8686	14.7391	2.1221	5.05391	18.3235	0.98969	8.47789	1.01106	0	0	0
Fsd1	276.495	1.00276	0.319125	3.14221	0.00167678	0.0182779	270.345	330.646	338.892	280.246	350.46	333.104	345.915	315.899	367.033	140.368	381.663	212.11	191.309	165.826	123.608
Rcor2	672.483	1.18483	0.377116	3.14182	0.00167899	0.0182881	819.454	539.635	808.186	844.216	909.378	1162.27	493.106	437.379	561.358	934.439	865.517	430.507	291.763	283.366	706.66
Hmcn1	263.151	-3.08466	0.982383	-3.13997	0.00168963	0.0183899	27.7648	26.7229	59.2646	87.3062	127.678	58.8626	77.6025	897.438	94.7406	18.003	22.1647	122.576	747.041	1516.8	63.3026
Acly	6932.28	0.503016	0.160258	3.13879	0.00169644	0.0184425	8178.31	7220.15	5947.47	8844.27	6984.35	7890.57	7635.86	7645.71	7931.46	5494.56	7161.26	6313.16	5177.09	5266.45	6293.51
Il13ra2	36.9819	2.98598	0.951346	3.13869	0.00169706	0.0184425	64.6268	45.361	11.3992	72.6814	33.2426	109.277	17.213	15.6445	12.7563	23.7929	112.993	8.83181	6.31213	1.36427	19.2327
2020-09-03	118.53	1.76972	0.564128	3.1371	0.00170629	0.0185288	176.294	91.1355	87.3586	271.472	176.654	212.203	96.4548	42.4339	229.169	43.9714	108.28	48.8884	49.2078	52.8634	91.5577
Nnat	714.16	2.56016	0.81636	3.13606	0.00171233	0.0185802	1233.99	791.833	1719.94	140.567	2087.7	1106.69	536.273	227.315	1544.57	103.63	467.609	186.743	92.8949	122.831	349.811
Ssbp4	700.019	0.6196	0.197685	3.13428	0.00172279	0.0186794	707.997	837.145	745.762	771.146	706.542	832.76	922.789	776.885	826.511	579.991	817.028	472.019	487.241	551.316	465.157
Sdf2l1	585.058	0.966928	0.308603	3.13324	0.00172885	0.0187026	735.541	562.309	908.71	789.014	548.179	616.639	1007.44	514.493	437.511	516.631	498.656	641.309	371.659	313.346	314.442
Tes	3886.79	1.44727	0.461897	3.13331	0.00172845	0.0187026	2613.68	4144.52	3786.54	5427.91	7039.98	4876.16	4067.06	1907.79	6620.66	3765.59	4172.85	3518.14	1199.73	1275.72	3885.53
Wdr89	473.192	0.663171	0.211641	3.13347	0.00172752	0.0187026	571.096	549.218	522.901	588.369	479.594	568.709	626.721	415.862	396.53	355.221	477.301	512.697	324.608	333.007	376.039
Tram1l1	205.477	0.631176	0.2015	3.13239	0.00173391	0.018743	226.477	279.048	208.933	185.263	205.216	213.147	222.598	185.218	225.163	297.307	205.216	238.997	133.518	131.368	124.692
Lima1	7052.96	-0.963699	0.307682	-3.13212	0.00173546	0.0187456	4807.77	6180.23	3764.99	3691.19	7288.92	4335.81	5337.87	10600.8	8128.14	8080.6	6602.78	7104.16	8165.86	11809.3	9895.98
Olfml3	2254.59	-1.28911	0.411607	-3.13189	0.00173685	0.0187464	1583.83	2546.91	1213.45	918.783	1539.21	1768.22	1712.3	4952.9	2050.51	1746.21	2038.47	1420.62	4335.23	3475.11	2517.1
Hao1	42.6242	2.31684	0.74008	3.13053	0.00174493	0.0188194	102.017	23.1663	35.9885	97.8039	76.8388	57.5001	78.3796	14.4058	19.2212	20.4703	46.9887	19.9164	10.9604	10.7679	24.9385
Cnot10	1774.44	0.47206	0.150916	3.12797	0.00176017	0.0189694	1937.3	1694.3	2140.32	1798.09	1715.75	1927.24	2436.04	1737.96	1813.2	1705.86	1917.91	1870.15	1315.25	1313.68	1293.55
Parp9	556.549	-1.77545	0.56772	-3.12734	0.00176397	0.018996	446.314	826.104	244.776	147.901	387.096	195.988	619.747	805.588	570.473	616.32	180.422	805.232	857.055	1236.39	408.833
Asb6	1897.8	0.404688	0.129418	3.12698	0.00176612	0.0190048	1658.76	2115.39	1952.09	2176.24	2231.18	2425.51	1965.64	1895.96	1719.23	1631.37	1711.26	1822.26	1515.06	1843.02	1804.02
Cdk20	60.9958	1.16653	0.373203	3.12573	0.00177366	0.0190535	79.5731	78.9759	44.9856	77.1146	86.2094	91.207	60.6135	53.5073	72.3083	52.6379	63.2909	40.8287	23.9137	32.3037	57.4669
Cflar	1912.23	0.502482	0.160744	3.12597	0.00177219	0.0190535	1771.64	1987.73	1925.95	2489.98	2330.04	1955.34	1878.5	1586.82	1967.52	2178.19	1821.06	2007.87	1771.11	1297.64	1714.04
Pigo	293.14	-1.06539	0.340864	-3.12556	0.00177465	0.0190535	365.807	259.019	367.596	233.125	178.09	145.367	259.064	359.937	271.486	319.3	276.262	197.12	427.296	527.587	210.046
Trp53inp2	772.92	-0.931084	0.29792	-3.12528	0.00177635	0.0190573	498.865	731.495	399.821	601.075	624.87	522.804	678.431	712.571	1132.69	1017.3	759.498	579.953	885.379	1350.44	1098.61
Plek2	12.8192	2.42488	0.776091	3.12448	0.00178118	0.0190826	21.4235	9.47711	12.9959	39.4977	12.1818	21.8104	3.13518	16.4638	4.57647	10.7225	15.3432	10.954	3.98561	5.38395	4.33713
Serpina3h	23.9243	-2.77686	0.888753	-3.12445	0.00178138	0.0190826	8.20262	14.7645	3.96872	7.46691	7.47055	9.96395	5.18609	63.7862	12.8368	30.2971	12.4635	12.0103	80.9756	72.0683	17.404
Btg2	382.207	-1.08711	0.348012	-3.12376	0.00178554	0.0190984	340.736	331.699	307.902	408.143	258.628	230.992	337.555	392.044	247.13	325.575	351.936	293.767	976.475	592.234	338.296
Ppm1j	83.7858	1.53098	0.490072	3.12398	0.00178421	0.0190984	134.662	112.672	122.961	101.566	90.8947	58.4915	121.227	23.6667	71.393	105.276	106.444	120.494	18.9317	29.0733	39.0341
Ifi35	516.305	-1.1264	0.360652	-3.12324	0.00178872	0.0191181	623.765	597.691	519.55	303.242	253.816	306.724	674.909	661.174	489.121	409.549	294.73	724.642	576.193	941.606	367.862
Greb1	13.3405	3.39083	1.08601	3.12229	0.0017945	0.0191329	25.3069	22.5822	1.89004	24.9633	14.0077	14.9635	9.91213	13.4073	13.3884	10.7721	22.688	15.2519	9.2731	1.01791	0.683331
Il7	52.8314	-1.52905	0.489679	-3.12255	0.00179291	0.0191329	23.4642	34.7132	49.6839	25.2823	28.5836	18.4822	28.4053	43.1159	41.7307	159.051	62.4672	69.1528	78.4941	88.5123	41.3315
Kcnn3	36.8718	-3.1045	0.994354	-3.12213	0.00179547	0.0191329	17.9256	12.1788	7.81866	9.23475	12.8988	11.466	5.96902	131.415	20.3389	29.0996	2.42828	4.44105	130.057	111.386	46.4191
Kctd17	2065.2	-0.601442	0.192631	-3.12226	0.00179471	0.0191329	1590.59	2288.1	1891.49	1647.31	2017.49	1596.45	1754.39	2326.34	1991.83	2163.39	1972.03	1755.82	2410.14	3185.2	2387.49
Mri1	1055.34	0.5479	0.175602	3.12012	0.00180778	0.0192497	1162.91	1136.68	1370.93	1191.79	1257.78	1121.97	1187.88	1303.99	812.356	922.505	995.969	921.954	769.113	882.582	791.714
Sync	52.2087	-2.22471	0.713248	-3.11913	0.00181389	0.0193003	25.8573	14.4532	30.5053	26.8847	29.0467	17.9474	64.437	31.9417	18.3532	62.9254	56.8836	58.3871	173.745	157.862	13.9005
Got2	11665.1	0.618495	0.19836	3.11805	0.00182053	0.0193565	13210	12242.2	13093.7	14310.3	11040.3	13475.7	14486.5	12457.8	12082.7	9002.95	12706	11577.3	6587.04	8029.55	10673.6
Fam83f	9.82693	3.84106	1.23292	3.11542	0.00183686	0.0195156	40.8067	5.26506	16.9946	11.2851	21.5523	11.8966	9.40555	2.05797	2.74588	2.92433	13.4253	5.97493	1.99281	1.07679	0
Mnd1	178.823	0.880805	0.282765	3.11497	0.00183966	0.0195308	282.587	176.906	217.93	202.191	197.719	190.345	227.823	184.189	117.158	170.586	233.026	161.323	105.619	118.447	96.5011
Itga1	272.099	-1.75772	0.564331	-3.1147	0.00184133	0.0195339	82.6336	284.313	123.96	117.553	240.824	88.2329	72.1092	250.044	344.151	399.658	289.604	277.834	551.011	628.845	330.706
Hmha1	34.1994	1.90473	0.612113	3.11173	0.00185996	0.019717	33.8533	90.306	93.9915	54.0921	28.8254	39.4776	18.4957	12.5202	33.4105	27.2597	21.2146	26.4363	5.57291	7.14645	20.3891
Spred3	809.319	0.761852	0.244862	3.11136	0.00186229	0.019727	1068.41	944.552	725.582	942.696	1158.4	966.595	818.418	465.911	679.803	1049.12	800.965	710.297	653.184	508.469	647.39
Mrpl45	2325.44	0.690379	0.222018	3.10956	0.00187365	0.0198326	2839.66	2329.15	3447.14	2751.08	2040.64	2678.5	2736.04	2077.43	2536.96	1844.26	2410.09	2561.41	1292.77	1434.08	1902.47
Cks1b	7666.63	0.736694	0.237041	3.10787	0.0018844	0.0199011	8272.13	8409.74	9992.72	9247.09	8118.07	9573.91	10483	5798.18	7139.5	5894.04	8280.98	7623.03	4328.27	5241.01	6597.78
Lins	385.963	-0.541557	0.17426	-3.10775	0.00188518	0.0199011	360.243	299.583	347.535	360.317	337.995	324.322	305.96	484.409	405.03	357.256	338.961	378.73	478.77	523.592	486.745
Pcdhgb5	96.2371	3.4074	1.09645	3.10767	0.00188571	0.0199011	8.11314	25.209	74.0083	95.4899	728.875	15.9619	38.5862	100.393	207.008	34.2124	12.5879	23.8531	4.05365	57.9038	17.3011
Sidt2	2679.01	-0.639768	0.205841	-3.10808	0.0018831	0.0199011	2124.58	2723.02	1880	2313.68	2404.6	2355.91	1887.77	2884.37	2306.62	2350.76	3083.93	2843.95	3707.07	3049.32	4269.63
Rac1	14809.4	-0.419378	0.134979	-3.10698	0.00189009	0.0199326	13037.3	13057.6	14789.1	14899.9	13181.7	11817.7	14121.6	14653.7	15963.9	14618.6	13301.2	15338.5	15312.1	19718.4	18329.7
Zfp493	99.3958	0.892934	0.287557	3.10525	0.00190121	0.0200351	76.9196	68.9222	104.903	156.572	135.595	139.861	70.8457	91.2549	90.2412	100.728	109.689	112.907	100.095	47.2749	85.1279
Kbtbd7	234.036	-0.828551	0.26686	-3.10482	0.00190395	0.0200468	160.166	229.557	180.942	185.263	223.02	168.535	152.579	252.102	250.791	267.089	214.805	201.156	349.738	414.564	260.228
Pkdcc	428.013	-1.4132	0.455216	-3.10447	0.00190619	0.0200468	183.046	206.669	335.649	256.923	229.012	357.815	581.276	735.938	257.437	340.697	525.024	162.552	773.134	524.186	950.842
Rab15	42.2516	2.11682	0.681874	3.10442	0.00190654	0.0200468	39.6399	27.5739	43.6831	94.0311	67.5672	38.5214	33.5451	62.9492	59.2682	8.23395	86.6731	26.1087	17.6749	12.7339	15.5702
Raet1e	239.583	2.06688	0.665937	3.10371	0.00191109	0.0200799	265.243	251.41	470.779	364.95	382.513	149.468	330.848	126.32	630.879	80.1756	245.172	82.7248	138.286	30.6254	44.3488
Gmpr	207.725	0.686409	0.221391	3.10043	0.00193237	0.0202885	223.136	214.444	308.795	245.001	209.741	194.617	201.525	207.663	226.7	245.009	191.77	243.098	164.526	122.484	117.368
Fkbp3	3519.9	0.730464	0.235657	3.0997	0.00193719	0.0203241	4068.43	3540.23	5197.34	4001.49	3554.26	4614.88	4708	2646.55	2991.18	2886.31	3470.45	3784.12	2419.27	2196.65	2719.38
Polr1e	989.664	0.737582	0.238202	3.09645	0.00195851	0.0205327	1040.2	933.232	1662.36	1209.03	853.809	1172.11	1142.54	778.973	870.853	1035.28	1091.14	1115.31	683.061	609.706	647.35
Mpp3	48.9082	1.92627	0.622496	3.09442	0.00197195	0.0206432	85.5146	43.0696	79.319	85.0317	32.7761	68.3511	68.2675	17.5705	72.5603	20.2999	71.6282	40.4514	18.2359	14.4979	16.0501
Slc4a2	3199.63	-0.500538	0.161748	-3.09455	0.00197112	0.0206432	2776.31	3588.17	3048	3019.68	3071.31	2562.5	3144.59	3073.98	3080.2	3023.3	2381.65	2981.96	3751.83	4848.73	3642.32
Tollip	2055.05	-0.590069	0.190734	-3.09367	0.00197696	0.0206804	1580.96	2223.2	1602.27	1648.36	1959.44	1835.41	1889.13	2000.77	2013.61	1944.96	1746.84	2187.22	2758.58	3289.64	2145.29
Nog	50.0178	-2.57518	0.832734	-3.09243	0.00198523	0.0207517	27.5445	10.5301	71.977	18.8084	3.74823	23.7931	72.1092	77.174	27.4588	36.0667	11.5074	93.6072	58.7878	113.063	104.091
Sema3d	832.99	-3.22044	1.0415	-3.09211	0.00198737	0.0207589	227.497	393.827	421.865	443.879	161.174	302.371	333.374	569.029	108.92	559.521	110.28	405.299	4908.28	3487.72	61.804
Trpm6	20.449	2.06123	0.666856	3.09097	0.00199502	0.0208236	42.8471	42.1205	10.9965	23.5105	26.2376	24.7845	17.766	34.9855	10.9835	17.546	19.1791	17.9248	5.97842	7.53753	4.33713
Ehd3	87.0608	-1.47856	0.478467	-3.0902	0.00200019	0.0208623	54.0689	64.2338	37.9879	24.451	35.6082	47.5863	44.9376	135.826	169.33	162.788	142.884	86.6364	124.55	90.4503	84.574
Wdfy1	2463.95	-0.761616	0.246555	-3.08903	0.00200809	0.0209293	1887.75	2494.05	2215.65	2097.21	2426.52	1507.09	2970.36	2160.39	2493.77	2528.21	1606.69	2345.7	4243.2	3096.95	2885.7
Cys1	10.8845	-2.9402	0.951927	-3.08869	0.00201044	0.0209385	2.05602	1.41481	1.98241	7.30732	2.83418	5.07951	1.58042	8.2627	4.78489	3.17274	2.9004	7.52977	68.4037	40.3042	5.65404
Zfp46	592.751	-0.946655	0.306547	-3.08813	0.00201421	0.0209625	380.064	572.442	293.144	429.622	563.731	452.5	385.751	609.419	760.902	649.347	491.079	516.148	1122.37	962.948	701.786
Galnt16	30.8643	-2.12366	0.687764	-3.08778	0.00201659	0.020972	19.3832	22.1133	49.984	19.7489	11.2447	9.91381	17.766	32.9276	42.1036	4.87388	36.4402	17.9248	36.8669	52.7627	88.9111
Irf7	137.944	-2.75915	0.893656	-3.08748	0.00201858	0.0209774	166.786	283.321	28.4869	11.8966	32.7931	53.0082	131.703	223.791	117.258	98.3096	24.0856	238.766	167.43	446.395	45.1362
Usp18	608.687	-2.65423	0.859807	-3.087	0.00202186	0.0209961	689.634	1087.76	199.936	36.6765	232.391	160.604	734.678	1066.03	460.393	615.083	48.9066	1093.41	722.393	1665.79	316.61
Mmp28	40.2121	-2.25611	0.731394	-3.08467	0.00203778	0.021146	38.6815	24.0601	7.45548	19.055	22.5296	14.418	13.4526	73.5608	14.2579	33.6411	40.5701	33.7378	140.41	90.9469	36.405
Fam19a3	8.09338	4.81066	1.55996	3.08384	0.0020435	0.02119	2.01882	13.4994	11.6287	30.2128	11.497	3.53133	0.413616	0.814508	12.0961	10.5674	2.27722	21.5912	0.394358	0	0.858278
Set	25008.5	0.567975	0.184292	3.08193	0.00205664	0.0213107	24191.8	27581	28301.4	29323.8	24655.9	39000.9	25045.6	20635.2	23925.2	21821.1	23536.9	24387.3	19792.9	18234.2	24693.9
Arsj	310.461	-1.38426	0.449226	-3.08143	0.00206009	0.021331	388.684	495.969	185.941	62.0678	187.412	259.742	271.716	230.493	254.452	357.743	400.842	233.022	416.497	402.719	509.612
Mfsd7a	21.3164	2.20399	0.715523	3.08026	0.00206822	0.0213841	31.6252	16.8482	8.99713	31.9743	34.6712	20.819	12.5407	46.3044	33.8659	24.3694	29.7275	8.96239	4.98202	5.38395	8.67425
Sel1l	2471.69	-0.767986	0.249314	-3.0804	0.00206725	0.0213841	2129.03	2567.99	2599.2	1997.62	2106.84	1889.37	1740.76	2858.27	2345.69	2608.81	1708.05	2317.34	4324.85	3476.32	2405.28
Atg4a	209.519	-0.582008	0.188973	-3.07985	0.00207105	0.0213903	162.201	191.095	182.731	184.507	198.973	161.015	186.002	208.319	219.462	248.636	192.476	192.19	254.539	319.107	241.537
Fdxr	214.911	0.627738	0.203828	3.07974	0.00207182	0.0213903	338.309	229.682	269.921	235.284	196.378	238.901	229.282	221.448	191.213	182.799	242.312	213.734	133.933	144.445	156.024
Fbxo32	108.298	-2.09368	0.680119	-3.0784	0.00208117	0.0214557	78.5529	104.248	38.9876	37.6169	77.7759	58.4915	40.7574	71	128.141	49.7136	35.4813	161.323	101.633	165.826	474.915
Gm3052	59.2089	1.09359	0.355244	3.07842	0.00208098	0.0214557	81.3951	67.2125	134.596	60.026	72.895	73.1659	41.6906	33.8657	51.315	43.7475	64.0779	67.5347	29.8121	35.439	31.36
Tbc1d20	2845.85	-0.44472	0.144543	-3.07673	0.00209282	0.0215603	2292.77	2704.19	2063.06	2246.58	2798.54	2876.06	2873.89	3378.29	2919.65	2601.66	2711.92	2440.8	3798.27	3650.32	3331.69
Plxnb1	341.36	1.18851	0.38641	3.07578	0.00209953	0.0215982	312.482	279.65	164.942	337.872	550.321	441.48	553.595	413.172	518.921	447.858	355.028	161.621	201.982	126.903	254.579
Slc3a2	3231.33	-0.505618	0.164387	-3.07578	0.0020995	0.0215982	2947.4	3203.65	2763.73	3301.39	2788.55	2817.03	2722.61	3166.82	2895.58	2594.46	2734	3889.16	4109.08	4452.83	4083.73
Ankrd9	232.763	0.75825	0.246604	3.07477	0.00210663	0.0216089	299.091	238.827	339.43	254.759	254.766	286.925	231.93	207.563	145.697	253.72	275.086	233.313	179.507	179.431	111.396
Lats2	2831	-0.869199	0.28268	-3.07485	0.00210608	0.0216089	2153.47	3252.19	1579.57	2950.34	2015.02	1685.74	2442.91	2289.4	3198.36	2667.69	2543.94	3536.39	4132.22	4205.23	3812.55
Ralb	1922.53	-0.349064	0.113508	-3.07524	0.00210331	0.0216089	1814.16	1864.98	1839.37	1745.74	1660.02	1785.67	1980.54	2389.82	1859.06	1875.2	1653.78	1757.82	2318.88	2092.46	2200.48
Zfp599	228.365	0.884104	0.28752	3.07493	0.00210549	0.0216089	243.82	182.171	173.944	384.633	301.733	299.397	169.3	134.797	226.078	293.407	232.067	249.951	179.353	117.37	237.458
Atxn7l3b	3346.93	-0.763763	0.248451	-3.07409	0.00211144	0.021627	3072.83	3576.21	2286.91	2603.87	2979.86	2870.79	2829.18	3863.92	2598.9	3149.92	2829.37	3186.94	4158.79	6587.32	3609.1
Col4a5	1618.46	-1.73147	0.563244	-3.0741	0.00211142	0.021627	622.709	1597.84	974	1253.16	1007.61	635.566	1187.74	1808.26	3022.97	208.024	846.295	1494.38	2264.34	3082.33	4271.63
Adam12	810.097	-1.73168	0.563423	-3.07349	0.00211569	0.0216551	305.037	486.704	247.223	321.76	659.135	474.321	584.708	524.511	2216.72	275.213	540.873	681.436	1099.82	1025.18	2708.81
Aldoc	28.4677	1.7357	0.565071	3.07164	0.00212884	0.0217091	26.6503	24.7776	31.7692	17.9793	82.8378	28.0564	21.1811	21.4443	24.8513	36.0747	43.8091	28.9977	13.07	11.3538	14.1626
Hiatl1	1375.78	-0.646938	0.210604	-3.07182	0.00212761	0.0217091	1005.62	1221.9	971.613	1272.38	1213.1	1203.39	881.665	1515.88	1564.65	1433.13	1178.99	1398.04	1855.48	2146.25	1774.66
Hsd17b10	2749.36	0.628274	0.204541	3.07163	0.00212893	0.0217091	3258.34	2738.51	3583.66	3140.12	2813.15	3442.66	3634.92	2991	2140	2345.27	2943.37	2130.91	2027.64	2004.7	2046.22
Mgme1	562.492	0.586382	0.190903	3.07162	0.00212902	0.0217091	598.202	545.034	625.223	644.167	490.167	716.997	703.54	600.124	591.963	482.135	613.614	592.896	348.153	401.964	483.196
Sap30bp	1591.83	0.424155	0.138095	3.07147	0.0021301	0.0217091	1666.21	1669.01	1632.86	1659.19	1540.28	2049.95	1797.5	1941.02	1608.16	1525.17	1344.3	1530.96	1419.79	1205.43	1287.69
Tap2	373.307	-1.43461	0.466999	-3.07198	0.00212642	0.0217091	278.106	608.83	213.268	171.221	298.312	179.649	273.315	517.284	368.516	372.46	214.519	347.571	847.561	626.508	282.479
Lsm1	1234.54	0.75351	0.245457	3.06983	0.00214179	0.0218126	1333.36	1193.06	1450.54	1510.32	1757.92	1336.38	1496.53	1117.48	1058.08	861.702	1448.02	1222.87	699.475	874.353	1158.01
Kctd15	756.818	-0.962562	0.313628	-3.06912	0.00214693	0.0218494	731.405	383.25	642.61	472.041	741.219	651.403	790.146	659.626	532.681	701.906	773.954	638.372	1260.44	1618.58	754.646
Ggct	175.415	1.80081	0.586872	3.06849	0.00215142	0.0218795	231.382	118.459	228.98	216.445	109.759	348.582	267.489	119.774	101.051	137.671	447.728	110.338	64.1894	46.3647	83.0189
Elavl1	713.027	0.689246	0.224646	3.06814	0.00215396	0.0218896	931.413	627.595	730.767	1053.27	807.744	857.544	606.135	591.667	759.695	656.999	730.722	655.25	431.443	530.857	724.3
Slc2a3	494.426	1.55116	0.505626	3.0678	0.00215638	0.0218986	422.407	877.458	357.433	281.802	1030.61	455.836	778.817	1002.89	596.183	212.782	353.368	441.26	214.608	109.648	281.289
Lrfn5	8.59075	4.7278	1.54151	3.067	0.00216221	0.0219224	22.6247	15.1496	4.42269	9.78964	20.4483	23.6847	12.794	6.03509	0	0	6.57052	5.29698	0	1.01902	1.02611
Rras	1444.66	-0.444256	0.144841	-3.06721	0.00216067	0.0219224	1424.15	1459.48	1660.47	1057.03	1263.15	1265.99	1540.42	1347.97	1206.36	1526.5	1529.53	1509.66	1587.27	1859.62	1432.34
Serinc2	99.3199	1.5571	0.50772	3.06684	0.00216334	0.0219224	213.553	74.7354	76.2157	121.317	100.019	139.788	99.5632	260.757	109.744	41.5051	66.1411	63.5862	26.7259	44.9067	51.2414
Arhgap28	1624.99	-1.01655	0.331606	-3.06553	0.00217283	0.0220029	1032.77	1707.8	1021.45	1341.63	722.385	1303.69	1752.28	3144.45	1872.75	1642.69	929.037	1091.23	2600.86	2150	2061.81
Pygo2	2996.95	0.391057	0.127575	3.06532	0.00217436	0.0220029	3390.21	3151.88	3257.23	3230.37	3090.71	3705.81	2808.94	2714.41	2983.01	2652.84	3093.14	3228.72	2249.76	2550.51	2846.67
Pdlim2	1881.47	1.24568	0.406492	3.06447	0.00218056	0.0220343	1622.54	2605.28	2635.08	1461.27	3120.58	1663.66	3346.9	1821.05	1723.18	1276.68	2688.56	1622.9	795.184	1247.58	591.567
Thnsl1	250.255	0.777682	0.253765	3.06458	0.00217977	0.0220343	219.44	297.02	377.521	290.448	276.816	287.229	270.528	226.121	232.9	330.703	194.535	252.002	189.354	140.999	168.205
Sat1	4237.58	1.27509	0.416177	3.06382	0.00218529	0.0220665	4297.45	4891.81	8341.74	5215.41	5728.61	3889.68	6999.1	2019.61	3374.84	2864.02	3788.45	6023.38	1721.03	2027.85	2380.67
Anks1b	86.6858	2.37206	0.774351	3.06328	0.00218922	0.0220905	68.1178	66.3475	81.596	120.13	468.227	79.6575	56.4187	15.3434	73.8239	67.4459	16.3585	51.7498	14.4927	78.5237	42.0549
Cnnm3	378.544	0.690554	0.225543	3.06174	0.00220054	0.022189	395.087	333.3	261.839	531.373	412.934	564.837	351.515	516.043	396.343	389.648	271.469	318.922	313.857	306.667	314.324
Smim3	1541.85	0.832124	0.271813	3.06138	0.00220317	0.0221999	1625.13	1259.4	1916.39	1381.48	1938.77	1719.05	2399.46	1532.16	1566.98	1621.05	2138.47	1198.97	1041.24	760.213	1028.98
Rab28	1171.46	-0.793432	0.259198	-3.06111	0.0022052	0.0222046	803.892	886.636	1039.67	1120.98	777.759	986.424	1144.34	1560.97	957.398	1439.74	938.815	915.16	1958.93	1741.17	1300.05
Hsp90b1	34794.9	-0.510103	0.166653	-3.06087	0.00220697	0.0222067	33029.4	30027.6	33350	31474.4	33251.1	25548.6	27099.9	29095.5	29752.3	48337.2	31655.6	40737.2	46861.9	42573.1	39129.1
Nsun2	10775.1	0.531535	0.17368	3.06042	0.00221024	0.022224	11993	11810.1	11884.6	13069.1	10135.2	12751.6	11157	8935.53	10962.6	9955.67	12010.4	12086.2	7186.19	7440.38	10248.2
Cdkn1b	1272.33	-0.946101	0.309373	-3.05812	0.00222729	0.0223797	945.378	1045.15	1007	738.495	1320.83	880.876	1581.65	1392.04	891.553	1543.87	1061.23	1012.05	2417.39	2006.46	1240.97
Chsy1	1821.26	-0.487136	0.159386	-3.05633	0.00224063	0.0224978	1537.39	1543.72	1504.52	1801.85	1557.39	1829.1	1850.8	1891.28	1639.29	1874.49	1523.78	1493.73	2633.49	2718.89	1919.18
Irf9	1266.88	-1.37111	0.448725	-3.05556	0.00224643	0.0225402	1362.17	1833.41	714.407	479.701	807.825	702.898	1302.45	1845.97	1185.77	1324.99	507.821	1787.26	1619.38	2390.7	1138.43
2610305D13Rik	19.9063	4.72381	1.54677	3.05398	0.00225824	0.0226428	20.2215	5.03388	2.61062	222.745	19.0135	5.59967	0.900648	1.77359	0	11.3229	0	0	6.5765	0.927992	1.8689
4933427D14Rik	458.545	0.660739	0.216422	3.05301	0.00226557	0.0226603	508.046	605.238	413.185	589.933	550.784	622.777	309.28	422.447	515.821	426.733	426.507	371.537	334.047	347.699	434.147
Cbwd1	550.875	0.52235	0.171111	3.0527	0.00226793	0.0226603	690.654	586.528	587.812	746.695	511.634	625.561	504.764	451.725	542.77	578.042	556.193	568.614	381.623	438.253	492.264
Cpa6	150.187	-1.43988	0.471654	-3.05284	0.00226686	0.0226603	114.699	153.6	101.212	74.4518	143.122	62.6383	93.087	275.752	132.21	96.6377	139.135	106.29	178.02	179.582	402.375
Flrt3	652.983	-1.17658	0.385346	-3.05331	0.00226334	0.0226603	643.098	578.675	646.065	410.751	486.089	445.51	683.524	373.037	562.395	565.576	396.171	969.91	1445.93	1083.54	504.464
Pelp1	2282.06	0.529647	0.173487	3.05295	0.00226604	0.0226603	3025.93	2236.21	2413.88	2618.91	2161.44	2830.97	2505.55	2229.54	2388.73	1769.98	2403.41	2373.77	1606.15	1807.85	1858.62
Prl2c2	455.952	2.26012	0.7405	3.05215	0.00227209	0.0226859	903.869	155.846	885.717	173.038	60.9088	305.345	315.608	573.145	187.635	578.042	766.203	1821.36	33.8777	66.761	11.9271
Slc4a8	99.5537	1.79908	0.589617	3.05126	0.00227879	0.0227369	266.718	109.681	81.0561	104.28	62.2282	113.578	192.589	92.066	63.6048	45.793	128.422	152.274	31.1832	32.0449	17.7895
Plch1	134.251	1.97596	0.647633	3.05105	0.00228043	0.0227374	242.842	271.937	112.25	286.877	145.518	74.4415	194.351	61.0236	161.354	52.1686	93.0253	188.288	17.0487	56.9778	55.657
Slc9a3r1	636.889	1.08911	0.357155	3.04941	0.00229291	0.0228458	645.766	586.528	658.79	738.231	872.401	569.053	887.257	576.232	571.144	814.912	1070.19	537.743	175.367	363.955	485.758
Angel1	76.0838	1.11829	0.366818	3.04864	0.00229883	0.0228728	100.56	71.8601	60.9347	94.8734	120.789	80.4463	59.9135	36.8594	84.2401	114.115	101.775	79.6947	52.0205	33.2782	49.8963
Lsm12	2569.77	0.425037	0.139414	3.04873	0.0022981	0.0228728	3088.87	2704.8	3530.93	2803.9	2587.19	2812.35	2829.59	2317.78	2725.64	2027.5	2450.2	2557.25	1985.09	2061.55	2063.97
Aldh1a2	21.4854	5.03913	1.65414	3.04638	0.00231612	0.0230288	32.6454	1.05301	9.99681	2.82127	5.62235	201.25	1.04506	4.11594	7.32236	0	46.0297	3.98328	0.996404	3.23037	2.16856
Runx2	2001.44	-0.914363	0.300218	-3.04566	0.0023217	0.0230682	1371.01	1798.92	1090.73	1784.46	1946.7	1482.9	1124.68	1675.12	2242.92	2564.74	1450.58	1661.78	3857.33	3341.24	2628.58
Tmem237	819.245	0.393407	0.129227	3.0443	0.00233223	0.0231566	720.853	804.789	824.281	932.641	918.419	835.104	903.777	1047.25	942.297	883.996	727.551	703.009	716.164	646.853	681.692
Sgce	1285.57	-0.543641	0.178608	-3.04377	0.00233633	0.0231812	1080.87	1451.97	1351.86	972.567	1217.76	877.692	1296.83	1521.13	1303.34	1201.24	1273.41	1261.58	1227.06	1580.61	1665.64
Bdkrb2	94.2412	3.18246	1.04607	3.04231	0.00234773	0.0232619	41.8269	125.308	155.95	197.489	263.313	48.5777	47.0277	19.5507	156.515	51.6631	227.272	22.9039	0.996404	10.7679	44.4555
Jag2	11.3366	3.21212	1.05576	3.04246	0.00234649	0.0232619	14.2824	2.10602	5.99808	39.4977	5.62235	41.638	25.0815	6.17392	2.74588	4.87388	5.75372	6.97075	4.98202	2.15358	2.16856
Klhl32	37.827	2.50918	0.824836	3.04204	0.00234984	0.0232667	49.9234	22.9672	10.8479	87.0914	25.4512	82.4637	69.0219	15.0709	56.4004	56.0848	9.18362	47.8163	5.61305	10.312	19.1567
Cdh15	12.9605	3.01946	0.992713	3.04162	0.00235305	0.0232823	19.3832	25.2723	18.9939	40.4381	4.68529	21.8104	17.766	19.5507	2.74588	5.84865	4.79477	4.97911	5.97842	1.07679	1.08428
Gm3555	6.00589	7.26133	2.38802	3.04073	0.00236004	0.0233353	0	0	0	29.1531	27.1747	32.7156	1.04506	0	0	0	0	0	0	0	0
Srgap1	288.273	-1.26854	0.417211	-3.04051	0.00236176	0.0233361	326.271	219.785	164.505	266.879	176.085	197.39	131.04	395.959	145.821	187.993	272.264	296.934	411.693	638.182	493.291
Pkd2	3368.25	-1.10051	0.362268	-3.03783	0.00238286	0.0235282	1908.4	3148.08	1692.16	1856.21	3605.77	1900.35	2066.33	3317.77	4687.72	4518.73	3309.12	2725.9	6226.86	4448.74	5111.6
Disp2	15.4134	3.30795	1.08926	3.03688	0.00239043	0.0235867	7.57114	33.6509	18.5477	13.9586	37.9462	25.7512	13.5902	6.16587	33.115	1.80857	28.4674	2.77142	1.84869	3.99568	2.01174
Fam49b	2026.74	0.502131	0.165382	3.0362	0.00239584	0.0235911	2486.73	2361	2776.88	2513.05	2022.64	1890.63	2130.28	1860.39	1864.78	1985.34	2169.42	1801.84	1343.66	1379.63	1814.77
Pycr2	2356.94	0.660456	0.217514	3.03638	0.00239438	0.0235911	3020.18	2472.56	3103.61	2731.45	1858.04	3389.54	2932.32	2225.6	2075.39	2004.32	2198.58	2294.58	1575.25	1717.16	1755.6
Wdr5b	157.36	-1.00248	0.330158	-3.03635	0.00239458	0.0235911	102.017	175.853	169.946	83.6975	106.825	144.742	134.813	171.841	169.33	133.544	132.336	164.31	248.104	286.426	136.619
Pkm	134649	0.709308	0.233705	3.03505	0.00240493	0.0236642	141066	137418	157632	152924	148390	146607	209398	104212	133980	126614	143554	143990	75567.7	85827	112560
Aloxe3	23.1553	2.14607	0.707153	3.03481	0.00240689	0.0236672	45.5755	17.7348	22.8523	42.2995	31.8385	9.90223	31.098	12.1072	23.1663	14.9997	29.2973	47.1972	9.32906	4.33126	5.60011
Comp	11.7313	-3.5331	1.16454	-3.03389	0.00241418	0.0237226	6.12101	0	1.99936	2.82127	1.87412	2.97414	6.27037	39.1015	3.66118	5.84865	7.67162	8.96239	35.8705	48.4555	4.33713
Mx1	44.3542	-2.15656	0.711017	-3.03306	0.00242088	0.023772	26.7296	27.8338	13.7014	27.6198	18.3473	15.5287	49.283	85.246	23.2975	37.9085	11.2656	54.1399	85.7334	161.079	27.5989
Parp10	381.239	-1.16212	0.383372	-3.03131	0.00243496	0.0238938	329.861	527.329	288.762	191.571	311.67	233.237	401.586	433.564	327.17	312.632	208.449	504.674	538.231	774.506	335.343
Igtp	225.036	-1.74036	0.574267	-3.03058	0.00244082	0.0239348	231.061	306.68	167.982	45.7588	145.35	75.321	262.658	324.784	273.616	220.759	64.4506	366.484	267.992	470.552	152.085
N6amt1	526.443	-0.720643	0.237861	-3.02968	0.00244812	0.0239899	478.927	488.666	518.47	417.414	442.313	412.447	644.409	597.12	405.174	394.073	446.733	554.966	856.573	744.184	495.169
Wdr46	3055.06	0.587895	0.194104	3.02876	0.00245557	0.0240464	3436.76	3081.41	3344.58	3633.98	3144.55	3968.83	3562.1	2660.47	2768.69	2362.42	3322.11	3389.31	2029.84	2281.73	2839.09
Bmp4	1134.1	-3.92892	1.29826	-3.02631	0.00247559	0.0241981	161.586	296.473	292.28	574.411	16.0826	78.5253	765.109	1636.82	83.8516	1040.44	336.403	1542.67	3515.55	6553.77	117.557
Cbr1	586.19	0.617634	0.204084	3.02637	0.00247509	0.0241981	699.835	716.048	789.748	608.453	592.221	647.372	726.317	582.406	583.958	423.053	710.584	508.865	454.36	410.257	339.38
R3hdm4	1502.4	-0.574671	0.189896	-3.02624	0.00247615	0.0241981	1665.2	1674.92	1334.98	1179.71	1574.5	1094.99	1494.52	1488.28	1335.74	1195.52	1323.73	1440.32	1680.19	2342.06	1711.32
Fam46a	534.304	-1.80946	0.598264	-3.02452	0.00249026	0.0243192	206.664	399.179	409.038	141.467	263.128	451.376	451.712	850.313	369.003	776.189	188.493	508.325	1611.8	1042.08	345.789
Mrpl10	1959.39	0.457867	0.151434	3.02355	0.00249831	0.0243812	2435.31	2007.82	2627.53	2177.05	1694.26	2119.55	2392.65	2076.88	2115.62	1559.4	1914.5	1908.7	1448.34	1465.01	1448.18
Rpl27-ps3	1873.48	0.992349	0.328291	3.02277	0.00250471	0.0244102	2636.11	1619.53	3115.01	1712.51	1406.52	2072.98	2855.11	1841.89	1778.42	1768.24	2239.16	2446.73	631.72	690.222	1288.13
Tmem106a	113.742	-1.49329	0.493982	-3.02295	0.0025032	0.0244102	105.532	149.499	37.9612	49.0931	98.5168	60.2612	74.6323	186.418	75.2549	88.3229	85.9336	110.395	189.079	215.987	179.244
Tceal3	26.4573	2.44888	0.810233	3.02244	0.00250747	0.0244205	49.6633	35.5428	41.5545	56.773	22.6668	21.2798	23.3293	18.09	67.6844	5.23084	16.2756	19.3551	1.33673	10.8037	7.27309
Raver1	5398.01	0.3153	0.104419	3.01958	0.0025313	0.0246356	5829.24	5235.58	4746.48	6029.04	5668.27	6600.61	5624.52	5544.18	5035.04	5429.5	5429.59	5092.63	4802.66	4972.61	4930.23
Leprot	1528.34	-0.452157	0.149753	-3.01935	0.0025332	0.0246373	1370.13	1598.07	1673.92	1058.71	1520.88	1166.66	1589.8	1650.84	1621.19	1598.58	1542.17	1408.85	1780.71	1756.24	1588.38
Alg14	442.413	-0.481195	0.159403	-3.01874	0.00253829	0.0246663	394.805	363.289	447.857	402.501	428.236	318.233	468.187	456.87	405.476	447.422	467.01	431.191	468.31	554.547	582.259
Fam83g	20.6848	2.81385	0.932176	3.01858	0.00253964	0.0246663	8.95629	18.8045	57.3099	73.3299	20.0529	23.6456	25.0022	17.4058	4.01779	5.14141	13.5933	26.2276	3.49906	7.56643	5.71899
Snx6	2576.99	0.385925	0.127872	3.01806	0.00254401	0.0246919	3087.03	2887.36	2697.14	2709.36	2629.39	2976.13	2909.45	2264.8	2243.39	2612.4	2665.89	2610.05	2265.82	2143.89	1952.79
Fam13a	35.1807	2.13382	0.707124	3.0176	0.00254786	0.0247025	34.1179	39.0601	13.5323	48.3201	62.5661	123.198	8.32153	28.8179	36.2151	50.6212	18.3261	11.1012	12.3201	23.9653	17.2276
Hoga1	37.4521	1.17298	0.388724	3.01752	0.00254856	0.0247025	40.6925	32.5946	25.1452	48.1141	56.3018	52.6939	43.0668	37.5571	38.7317	34.4199	50.5234	33.6343	20.4775	13.175	34.6534
Cldn19	35.9087	-5.45947	1.80973	-3.01673	0.0025552	0.0247332	3.89716	0.735391	0.698146	3.59543	1.30882	2.7694	0	177.923	0	0	4.68792	8.91053	148.424	182.652	3.02891
Got1	1808.82	0.776851	0.2575	3.01689	0.00255381	0.0247332	2117.46	1782.7	2457.94	3053.53	2061.52	2028.79	1630.92	1381.54	1496.28	1353.77	2013.71	1584.34	1305.16	1007.62	1857.02
Prpf3	2981.31	0.840242	0.278557	3.01641	0.00255786	0.0247422	3787.83	2857.55	4428.38	3393.31	2669.46	4741.46	3224.9	2373.08	2434.02	2000.1	3228.27	3547.04	1883.32	1783.86	2367.06
Rsu1	3698.2	-0.542633	0.179999	-3.01464	0.00257286	0.0248704	3153.18	3780.82	3367.73	3117.85	3885.35	2402.97	3860.98	3604.75	3190.43	3739.2	3635.95	4031.86	4618.97	5087.34	3995.67
Cdca7	2401.13	0.521456	0.173026	3.01375	0.00258041	0.0249096	2158.4	2683.84	2476.36	2675.32	2369.55	3394.19	2651.38	2468.67	2492.18	2041.81	2391.66	2334.49	1860.07	1689.16	2329.94
Tfap2b	417.178	-7.98854	2.6506	-3.01386	0.00257949	0.0249096	138.409	1195.27	6.13768	11.7784	0.576578	0	6.44854	548.348	5.4348	43.2212	8.50391	1179.99	0.613093	3112.94	0
Hs1bp3	1004.71	0.602571	0.199962	3.01343	0.00258315	0.0249191	1306.84	1302.58	914.708	1060.8	1021.39	1195.61	1279.15	886.986	1104.76	807.114	996.352	1035.65	673.569	658.995	826.223
Sema4g	72.3602	1.0698	0.355069	3.01295	0.00258726	0.0249419	72.4115	66.0609	56.1069	83.1552	98.3226	103.421	56.1992	61.3937	70.5829	116.021	106.78	59.415	49.8261	25.4768	60.2314
Pnrc2	1816.16	-0.651268	0.216221	-3.01205	0.00259494	0.0249991	1360.97	1521.62	1963.78	1424.42	1753.61	1323.7	1667.85	1563.4	1568.75	2419.3	1726.79	1878.1	2781.29	2515.3	1773.45
Tma16	1314.83	0.744543	0.247323	3.01041	0.00260897	0.0251173	1491.56	1141.4	1397.44	1648.31	1687.52	1593.18	1284.63	1198.76	1231.88	985.114	1540.77	1579.5	754.959	810.434	1377.02
Glis2	1727.81	-0.961144	0.319539	-3.00791	0.00263053	0.0253077	1347.5	1491.46	1120.46	1717.32	1377.37	1113.86	1334.75	1726.15	1246.83	1656.56	1636.95	1955.3	4135.08	2629.66	1427.85
Cyp4a12b	9.25612	-6.7934	2.25872	-3.00763	0.00263295	0.0253139	4.08067	2.10602	3.99872	0	0	0	4.18024	15.4348	36.6118	2.92433	0	10.954	0	0	58.5512
Setd1b	908.061	-0.886091	0.29471	-3.00666	0.00264139	0.025378	753.18	783.003	438.884	744.482	936.161	659.929	521.225	1042.84	977.745	968.097	695.339	774.017	1626.82	1409.29	1289.91
Donson	730.046	0.710888	0.236554	3.00518	0.00265421	0.025484	818.994	836.5	735.84	987.611	852.669	779.972	807.531	507.242	954.263	547.617	754.245	767.45	591.546	457.205	552.002
Bloc1s6	959.77	0.472561	0.157269	3.0048	0.00265757	0.025499	938.005	1051.44	827.559	1171.71	1155.48	1142.6	900.387	1106.64	814.144	867.899	1028.49	891.119	935.121	812.475	753.477
Cacna1c	1617.98	-0.804188	0.267658	-3.00454	0.00265984	0.0255037	1075.76	1567.34	991.276	1145.32	1620.99	1515.33	1444.09	2151.48	1176.84	1542.59	1063.53	1498.58	2755.01	2544.35	2177.23
Fgd1	1397.51	-0.508015	0.169129	-3.00371	0.00266708	0.0255559	1186.85	1050.34	912.609	1323.73	1259.87	1464.86	1224.98	1567.76	1252.18	1357.65	1475.26	1129.85	1959.71	2133.07	1663.9
Phactr2	183.579	-1.27154	0.423366	-3.00341	0.00266972	0.025564	133.69	100.808	95.7321	112.334	181.504	86.7678	148.866	166.416	176.231	343.411	96.3418	193.695	391.768	311.335	214.789
Hexb	1456.36	-0.493297	0.164289	-3.00261	0.00267674	0.025614	1304.79	1562.67	1330.58	969.575	1260.34	1230.3	1524.74	1652.55	1487.35	1880.34	1319.52	1451.91	1572.32	1714.25	1584.14
Coro6	20.6922	-2.27438	0.75831	-2.99928	0.00270622	0.0258788	28.725	7.34352	14.1932	12.0004	7.22794	4.66996	32.7518	10.8298	16.3341	8.67058	16.8086	34.2899	59.9923	40.0762	16.4692
Zfhx2	379.056	1.05383	0.351465	2.99839	0.00271411	0.0259368	401.27	551.238	226.839	512.323	747.24	375.737	388.121	257.607	489.945	301.739	365.633	280.734	256.398	241.488	289.526
Polr2f	580.928	0.775949	0.258843	2.99775	0.00271977	0.0259735	675.351	688.67	846.73	554.849	477.9	800.044	676.154	666.783	467.716	491.287	689.487	608.447	280.986	444.714	344.802
Usp51	21.2624	2.46428	0.822237	2.99705	0.0027261	0.0259992	27.5445	24.2193	13.9955	37.6169	19.6782	66.4225	17.766	23.6667	21.0518	13.6469	18.2201	12.9457	18.9317	3.23037	0
Vegfb	1425.55	0.497294	0.165919	2.99721	0.00272467	0.0259992	1654.82	1457.58	1752.39	1536.97	1537.87	2023.33	1490.15	1178.88	1109.91	1465.05	1324.11	1241.11	1294.73	1119.87	1196.5
Agbl3	75.9223	-1.10442	0.368581	-2.9964	0.00273191	0.0260371	58.9288	54.2777	71.5661	52.5252	36.3067	75.9574	84.8244	79.3657	57.4383	89.5473	69.6363	58.2882	146.489	130.873	72.8098
Calhm2	262.703	-1.37946	0.460481	-2.99571	0.00273811	0.0260752	185.562	336.882	234.113	165.735	296.027	111.706	100.08	223.936	328.876	126.763	182.113	156.195	300.785	630.664	561.107
Stra6	9.18352	5.01381	1.67376	2.99554	0.00273956	0.0260752	1.91966	25.8872	15.9185	1.7696	18.8082	14.4804	9.8325	12.7121	7.28739	19.6526	7.91335	0.624615	0	0.946762	0
Sytl2	723.462	-1.52827	0.510473	-2.99382	0.00275504	0.026205	595.289	705.064	238.892	778.731	528.323	352.664	243.481	493.965	431.343	676.695	415.216	605.185	2804.04	1323.12	659.924
Vcpkmt	481.901	0.849809	0.283874	2.99362	0.00275693	0.0262055	589.657	544.407	741.763	482.436	540.683	664.225	654.208	470.247	323.099	316.802	513.999	451.107	370.662	267.044	298.177
Mfap4	460.479	-1.89052	0.631597	-2.99323	0.00276042	0.0262212	141.859	120.661	103.108	90.4037	582.707	183.659	308.083	790.329	1223.76	87.8495	72.0196	25.9267	1609.92	871.48	695.428
Nova1	160.703	-1.18499	0.395924	-2.99297	0.00276278	0.0262261	124.46	108.46	180.942	112.851	97.4541	111.035	177.66	93.6377	105.259	279.761	156.309	132.444	338.777	145.367	246.132
Ccdc88c	133.859	1.4195	0.474599	2.99094	0.00278118	0.0263833	182.61	86.3469	115.963	256.735	243.635	201.25	198.561	96.7246	74.1388	44.8396	110.28	134.436	81.706	60.3002	120.355
Polr3g	566.395	0.807332	0.270051	2.98956	0.00279384	0.0264681	473.052	612.462	834.442	735.037	579.916	648.88	564.081	439.423	619.106	815.178	469.419	584.042	366.904	310.407	443.583
Trap1	3991.77	0.530516	0.177448	2.9897	0.00279254	0.0264681	5053.36	4958.02	4656.42	4541.8	3893.35	4027.08	5134.27	4222.45	4145.65	2665.41	4181.19	3769.78	2851.96	2561.69	3214.13
H2-Q7	196.495	2.43033	0.813017	2.98928	0.00279639	0.0264748	383.41	299.968	374.153	175.827	760.869	39.7489	194.865	209.103	145.743	58.9174	55.6849	67.5536	99.7303	74.5602	7.2887
Adra1b	102.539	-2.23575	0.748523	-2.98688	0.00281843	0.0266657	88.8271	106.059	61.2225	58.0954	25.4946	30.9453	58.2715	185.373	92.1953	18.5747	56.1283	217.853	65.1018	270.752	203.195
Xdh	536.712	3.87156	1.29674	2.9856	0.00283024	0.0267596	380.523	1145.68	49.984	725.065	796.5	838.708	748.264	1107.19	481.445	278.786	1169.92	167.298	0	33.3805	127.945
Ttc27	1813.75	0.495648	0.166108	2.9839	0.002846	0.0268909	2155.61	1829.08	1892.4	2055.76	1851.63	2176.08	1950.08	1876.87	1668.58	1505.05	2004.21	1925.92	1278.39	1307.22	1729.43
Zfp827	1551.84	-0.719395	0.241147	-2.98322	0.00285232	0.0269327	1244.85	1534.85	938.242	1133.21	1842.64	1165.93	1201	1740.28	1615.76	1523.25	1264.8	1252.91	2368.64	2150.84	2300.37
Tgif1	2774.92	0.729374	0.244614	2.98174	0.00286619	0.027033	3570.76	2739.7	3535.92	3216.12	3117.69	3329.87	3350.06	1929.67	2183.15	2422.52	3796.87	2602.59	1956.69	1613.53	2258.63
Trpa1	7.17297	5.55327	1.86247	2.98168	0.00286673	0.027033	11.2218	4.21205	12.9959	5.64253	2.81118	18.8362	30.3068	1.02899	15.56	0	0	4.97911	0	0	0
Hpgd	12.2563	-4.23142	1.41978	-2.98034	0.00287929	0.0271334	10.2017	2.10602	3.99872	3.76169	0	2.97414	8.36049	14.4058	0.915295	4.87388	1.91791	3.98328	8.96763	116.293	1.08428
Mapkapk5	1120.68	-0.575102	0.192996	-2.97987	0.00288369	0.027157	1243.29	899.89	1270.75	938.54	710.311	852.529	1303.5	992.039	1300.58	1082.31	1252.77	1238.24	1073.64	1231.57	1420.21
Tpd52	1215.45	1.25165	0.42016	2.97899	0.00289198	0.027217	1229.05	935.404	2189.23	1895.17	1419.52	987.652	1799.16	681.364	1236.36	1118.32	1563.74	1370.21	507.575	401.925	897.018
Ttc12	198.885	1.18706	0.398567	2.97832	0.00289831	0.0272586	325.723	282.992	304.731	162.324	224.198	116.33	261.509	178.118	307.708	271.82	155.336	171.563	45.6917	53.4534	121.783
Myl4	27.3508	-1.43939	0.483489	-2.97708	0.00291005	0.027351	33.9831	16.9555	29.2333	19.3535	13.4039	7.28721	40.9163	26.9449	31.2372	20.2208	26.7789	35.1516	26.436	36.1024	46.2571
Dennd1a	788.108	-0.731071	0.245605	-2.97661	0.00291457	0.0273755	483.123	712.719	562.747	588.382	825.715	703.326	618.09	792.784	923.331	914.687	590.096	592.282	1251.08	1272.32	990.942
Aqp3	22.3075	2.13121	0.716144	2.97595	0.00292085	0.0273984	23.166	11.8434	13.4786	41.0544	41.2299	17.5878	40.2262	44.4945	10.1697	27.4209	31.9076	9.1866	10.9632	5.91919	5.96503
Ccdc96	14.4658	2.10245	0.706447	2.97609	0.00291947	0.0273984	17.3429	8.4241	15.9949	32.9148	20.6153	18.8362	19.8562	9.26088	15.56	7.7982	9.58953	23.8997	4.98202	2.15358	9.75853
Rb1cc1	1802.74	-1.13959	0.383071	-2.97489	0.00293093	0.0274748	1522.61	1145.83	2423.84	1436.35	1523.08	1065.89	662.971	974.139	1396.23	2738.72	1120.95	2161.5	3731.87	2139.41	2997.67
Rchy1	1075.89	-0.446483	0.150139	-2.97379	0.00294149	0.0275458	960.858	858.611	1133.33	896.029	897.497	961.469	1092.83	1319.57	1057.37	1200.76	1085.06	920.856	1236.89	1245.06	1272.22
S100a1	216.114	1.39694	0.469766	2.9737	0.00294236	0.0275458	446.146	224.289	290.645	108.044	323.902	311.226	151.587	152.679	224.922	252.247	244.646	228.985	54.317	161.359	66.7101
Pten	4695.53	-0.968414	0.325709	-2.97324	0.00294669	0.0275568	3026.08	4460.49	3779.49	3769.88	3697.07	3827.99	2263.16	4367.4	4107.92	7428.31	3144.41	4460.08	9433.05	6169.15	6498.4
Tmsb15b1	28.7651	2.00642	0.674841	2.97317	0.00294741	0.0275568	33.6655	31.5904	103.967	15.9872	59.9717	29.7414	20.9012	28.8116	19.2212	12.6721	30.6865	17.9248	7.97123	9.69111	8.67425
Trpv4	32.9841	-2.86845	0.964902	-2.97279	0.00295104	0.0275727	8.21057	4.51091	7.0707	16.412	6.90928	14.591	14.7829	58.2227	3.19193	17.4314	23.7392	44.7341	58.0382	201.826	15.0905
Eif2b2	1781.94	0.761284	0.256136	2.97219	0.00295685	0.0275908	2332.5	1883.44	2698.84	2226.11	1551.19	2188.67	2406.83	1361.46	1649.37	1298.48	1609.92	2002.62	1013.2	1236.17	1270.38
St3gal5	808.713	-0.889643	0.29932	-2.97221	0.00295666	0.0275908	780.753	578.471	410.768	818.837	550.583	764.762	400.601	773.33	754.098	933.899	747.626	663.191	1483.85	1159.13	1310.79
Rabepk	1034.42	0.537475	0.180931	2.97061	0.00297205	0.0277145	1064.38	1088.28	1070.01	1090.48	1108.72	1562.27	1135.19	913.685	958.968	859.049	1179.82	893.912	850.338	847.767	893.368
Ptdss1	806.899	-0.671384	0.226081	-2.96966	0.00298126	0.0277641	689.634	920.333	500.84	666.759	779.633	653.32	593.595	737.783	832.918	782.745	865.935	735.912	1140.88	1255.54	947.662
Snx3	4469.68	-0.413337	0.139185	-2.9697	0.0029809	0.0277641	4539.05	4349.45	5778.03	3648.81	3907.92	3530.73	4351.11	4437.88	3670.87	4336.15	4692.54	5036.07	4564.09	5186.67	5015.84
Lypd6	209.371	-1.40034	0.471722	-2.96857	0.00299192	0.0278452	257.92	267.061	130.82	161.542	80.0816	172.235	73.4788	119.97	159.016	330.016	102.417	195.915	461.62	251.715	376.75
Ankrd10	1381.13	0.949708	0.319953	2.96827	0.0029948	0.0278538	1608.46	1155.91	2085.82	1646.73	1089.74	2242.86	1763.34	890.407	933	1435.92	1632.75	1654.47	804.877	856.918	915.811
Smarca4	10155.3	0.418092	0.140887	2.96758	0.00300157	0.0278804	10660.4	10648.5	7488.05	11888.6	11095.3	11844.8	11361.4	9999.08	11166.4	9624.55	10467.7	10018.3	8405.5	8517.82	9143.13
Tmem80	185.612	-1.05647	0.355999	-2.96763	0.00300106	0.0278804	147.869	129.067	203.984	117.573	154.202	140.168	131.72	226.955	145.761	189.428	133.305	206.934	257.832	426.696	172.687
Sppl3	2047.41	-0.576015	0.194148	-2.96689	0.0030083	0.0279247	1634.32	1869.6	1506.27	1647.42	1925.29	1979.56	1898.24	2594.44	1842.25	2343.68	1617.13	1576.86	2806.55	2675.34	2794.15
Ddx50	2005.34	-0.348391	0.117454	-2.9662	0.00301503	0.0279689	2085.22	1932.28	1882.4	1952.32	1654.85	1654.61	1541.46	1793.52	1753.7	2423.29	2363.82	2344.16	2429.23	2268.8	2000.5
Adcy8	71.4456	10.2498	3.45758	2.96444	0.00303232	0.028111	241.78	109.513	0	41.3786	527.564	137.802	0	0	0	13.6469	0	0	0	0	0
Cr1l	971.78	-0.413743	0.139628	-2.96319	0.00304471	0.0282076	970.24	1033.7	1112.61	900.941	838.738	781.977	856.268	1080.42	865.562	925.908	874.707	975.239	1019.51	1075.69	1265.19
Gm12669	9.10427	6.76316	2.28277	2.9627	0.00304956	0.0282342	0	0	10.9965	31.0339	12.1818	19.8276	9.40555	15.4348	0	17.546	20.138	0	0	0	0
Il20rb	85.1632	0.858647	0.289914	2.96174	0.00305911	0.0283042	109.498	82.699	99.1854	94.304	93.1232	110.451	102.748	63.013	82.946	88.2332	92.575	93.6478	41.1299	47.0648	76.8304
Ctso	94.0705	-0.934745	0.315676	-2.96109	0.00306553	0.0283452	70.8845	84.4885	91.6499	72.9962	94.9518	56.0298	80.6824	74.4763	110.412	106.707	81.438	56.6996	175.347	122.45	131.844
Leprel2	1109.36	-1.00637	0.339978	-2.96009	0.00307545	0.0284095	905.085	1098.68	803.891	543.781	1068.24	806.532	1020.39	1448.02	918.969	1233.96	1096.73	838.131	2052.76	1929.26	875.959
Slc27a6	11.4437	-2.56873	0.867816	-2.95999	0.00307646	0.0284095	4.08067	11.5831	16.9946	2.82127	4.68529	3.96552	13.5858	5.14493	32.0353	1.94955	4.79477	1.99164	26.9029	11.8447	29.2756
Psmd11	4800.41	0.482108	0.162912	2.95931	0.00308327	0.0284539	5734.8	4937.3	5896.83	5530.14	4543.02	5334.18	5500.64	4404.58	4301.5	3965.59	5336.37	5490.9	3725.11	3798.45	3506.81
Tmem51	51.4841	3.15831	1.06817	2.95675	0.00310896	0.0286724	59.1697	70.5518	179.943	16.9276	249.258	5.94829	41.8024	45.2754	10.0682	7.7982	45.0708	9.95821	9.96404	10.7679	9.75853
Dynap	54.4581	3.45768	1.17125	2.95213	0.00315593	0.0290868	52.0286	32.6434	77.9751	14.1063	22.4894	69.3967	29.2617	32.9276	10.0682	8.77298	41.235	416.253	0	6.46074	3.25284
Cxcl5	14099.9	-2.40965	0.816325	-2.95183	0.00315902	0.0290964	8260.3	6604.49	3851.77	3932.84	462.907	3707.76	19161.2	36807.9	6024.47	58261.4	13372.6	7993.46	19765.7	19265.9	4025.94
Kctd9	1962.93	-0.715455	0.242506	-2.95026	0.00317503	0.029225	1300.99	1633.6	1192.74	1863.89	1895.29	1261.93	1402.25	2086.54	2699.18	2107.58	1747.12	2008.37	2675.25	2728.95	2840.23
Arhgef19	402.968	-1.08768	0.368792	-2.94931	0.00318484	0.0292965	241.445	164.259	114.134	291.04	330.394	336.284	235.03	362.792	486.651	673.077	453.887	319.277	926.322	528.781	581.142
Csnk1e	4412.52	0.564576	0.191567	2.94714	0.00320729	0.0294668	4301.55	5206.36	3786.43	5602.82	5069.65	5305.98	4475.06	3078.5	5034.6	4449.82	4521.33	4551.31	3141	3590.38	4072.97
Phka1	586.369	-0.926194	0.314271	-2.94712	0.0032075	0.0294668	542.486	490.086	327.208	488.952	553.949	355.645	360.77	646.287	786.097	567.659	621.423	397.21	1034.58	873.036	750.149
Braf	1015.73	-0.930163	0.315695	-2.9464	0.00321499	0.0295166	634.636	937.341	656.63	847.04	996.542	807.96	560.754	852.577	1103.9	1277.19	682.128	826.407	2198.27	1623.54	1230.98
Crtc3	844.599	-0.609914	0.207043	-2.94583	0.00322089	0.0295327	711.737	708.393	596.208	850.873	753.865	795.504	616.221	685.65	917.353	790.202	690.993	887.331	1553.2	1043.92	1067.53
Hspa12b	767.32	0.606683	0.205944	2.94586	0.00322054	0.0295327	748.088	945.407	677.754	682.164	1179.14	916.385	979.598	905.005	931.47	589.817	574.213	555.963	634.512	529.264	661.021
Nox4	134.088	-1.16291	0.394808	-2.94551	0.00322422	0.0295443	76.2985	98.5956	87.0944	104.938	93.7961	104.994	85.439	104.965	177.977	146.939	82.8361	166.863	341.997	205.211	133.38
Wdr45	756.169	0.763516	0.259233	2.94528	0.00322657	0.0295469	775.739	716.889	677.041	958.31	800.216	649.995	1014.37	852.38	751.607	733.412	938.255	1054.67	305.539	500.918	613.202
Gpr161	681.657	-0.824126	0.279925	-2.9441	0.00323896	0.0296413	405.875	666.083	518.337	482.922	587.713	604.978	465.797	735.659	1003.01	656.079	495.307	636.483	1001.48	837.477	1127.65
Fxr2	3399.19	0.645926	0.219417	2.94383	0.00324182	0.0296484	4217.53	2931.9	4279.8	4338.05	3107.34	4392.9	3822.56	2852.26	3212.72	2766.83	4012.77	3487.15	2254.63	2854.47	2456.96
Copg2	1269.7	-0.58856	0.199987	-2.94299	0.00325057	0.0297093	1168.38	1456.27	1030.15	948.051	1185.93	1034.59	1160.39	1498.4	1471.76	1252.67	982.038	1091.74	1867.74	1628.92	1268.47
Mthfsl	192.879	0.848702	0.288551	2.94125	0.00326886	0.0298574	218.926	139.766	209.519	204.351	262.292	227.188	242.13	210.726	187.348	160.988	265.914	178.541	97.4263	118.849	169.217
Fam193a	1508.9	-0.515892	0.175464	-2.94016	0.00328039	0.0299249	1268.46	1229.81	855.954	1471.97	1442.38	1323.86	1261.69	1654.46	1769.34	1547.58	1351.54	1396.06	2039.86	2004.68	2015.82
Xpnpep2	18.6032	2.67731	0.910601	2.94016	0.00328045	0.0299249	17.1544	25.6374	5.63483	29.107	59.2156	12.5572	9.1117	15.0266	14.0138	6.12143	59.5627	10.139	5.20454	6.14375	4.41892
Slc9a2	7.65508	3.88797	1.32276	2.93928	0.0032898	0.0299911	10.3837	1.92098	2.61975	45.1817	36.1907	1.80854	1.82578	0	1.59907	2.55449	4.18837	0.869879	1.74078	1.96435	1.97802
Gm13290	10.3593	2.73723	0.931582	2.93826	0.00330062	0.0300705	11.2218	5.26506	4.9984	31.0339	16.8671	8.92243	15.6759	10.2899	10.0682	3.8991	9.58953	18.9206	0	5.38395	3.25284
Acp1	3937.4	0.624412	0.212562	2.93756	0.0033081	0.0301194	4719.1	4329.1	5471.95	4335.49	3766.89	4800.62	4971.52	3101.17	3614.4	3155.48	3990.92	4434.18	2438.21	2664.61	3267.38
As3mt	66.8376	1.84093	0.627075	2.93574	0.00332752	0.0302211	102.017	62.1277	144.954	76.1742	62.7829	40.6466	133.768	63.7971	50.3412	42.8901	117.951	54.7702	5.97842	12.9215	31.4442
Mns1	784.6	0.873877	0.297613	2.93629	0.00332167	0.0302211	951.053	656.16	954.796	1060.36	750.529	893.407	989.782	515.762	1019.44	884.203	921.987	695.151	503.138	354.75	618.491
Ostf1	1476.81	-0.565786	0.192721	-2.93578	0.00332714	0.0302211	1467.87	1523.67	1579.86	1230.87	1415.26	1109.86	1193.17	1368.32	954.274	1739.29	1378.91	1631.27	2089.92	2043.23	1426.3
Rapgef4	15.6515	3.31645	1.12969	2.93572	0.00332775	0.0302211	21.7259	28.7235	3.83723	66.7389	17.1499	12.0337	11.2837	4.74025	6.28063	16.1476	27.576	7.91932	0.765022	9.85145	0
Crebl2	119.266	-1.04452	0.355853	-2.93527	0.00333263	0.0302461	68.9535	121.977	75.4664	84.8705	111.065	71.9477	114.033	138.629	138.155	118.08	104.407	86.5339	273.494	170.976	110.406
Hcfc2	943.746	-1.01793	0.346835	-2.93491	0.00333649	0.0302619	716.339	930.943	477.924	600.814	993.485	563.957	525.539	1161.76	1005.37	1075.74	684.333	1049.84	1642.37	1496.45	1231.32
Dph6	712.826	0.386844	0.131877	2.93337	0.00335308	0.030393	810.721	785.437	712.125	924.761	813.413	806.684	675.532	629.844	634.323	718.019	606.526	627.031	627.349	583.453	737.168
Gdpd5	61.6529	-1.89045	0.644779	-2.93193	0.00336864	0.0305147	38.7664	29.4843	28.9907	49.8424	60.9088	13.8793	15.6759	57.6232	75.0542	13.6469	35.4813	42.8203	84.6943	226.126	151.799
Fam65b	351.451	-1.5523	0.52952	-2.93152	0.00337307	0.0305354	186.779	376.324	76.1109	364.886	91.0217	231.698	212.592	323.476	233.814	355.807	265.616	536.591	720.28	574.19	722.586
4833439L19Rik	2834.01	0.331124	0.112976	2.93093	0.00337946	0.0305739	2869.45	2915.97	2666.95	3082.02	3159.61	3446.63	2822	2571.29	2438.67	2828.56	3146.36	2860.81	2528.74	2863.41	2309.7
Ccdc162	5.75056	2.9266	0.998896	2.92983	0.00339146	0.0306629	7.81982	1.12522	7.66791	9.57521	14.6002	10.0387	4.49783	5.20974	4.9367	3.65837	6.27411	6.10593	2.52239	1.06767	1.15863
Sdhd	4160.45	0.478889	0.163471	2.9295	0.00339507	0.0306761	3934.79	4002.5	5156.35	4141.62	4146.48	4825.05	5818.9	4667.48	4059.33	3890.33	4405.43	3949.43	2957.33	3226.06	3225.74
Lin54	1064.53	-0.704998	0.24069	-2.92908	0.00339972	0.0306986	721.546	832.365	765.634	1107.2	936.067	802.049	770.822	910.376	1279.18	1326.4	806.06	1072.25	1769.3	1294.77	1573.95
Gm9320	62.0294	0.86567	0.295754	2.92699	0.00342257	0.0308564	53.0487	50.5446	73.9764	86.5188	58.0976	77.3277	64.7938	60.7102	71.393	66.2847	60.414	85.6406	42.8454	44.1484	34.697
Pdk2	92.6202	-1.19174	0.407149	-2.92704	0.00342209	0.0308564	73.6797	55.4731	57.7601	84.5	64.7913	60.4464	68.3738	118.907	75.8429	86.1141	79.0363	84.0165	264.737	138.219	77.4062
Phex	61.4031	1.46645	0.501025	2.92689	0.00342368	0.0308564	90.5513	68.9541	82.8798	136.078	96.2329	57.8331	48.8748	26.5037	56.6464	26.2018	57.0929	68.3118	29.0973	20.1703	55.6186
Cdkn2a	12124.4	0.908512	0.310497	2.926	0.00343356	0.0309259	16377.5	13702.4	17341.7	13695.1	11954.6	13786.9	16918.2	12614.6	10076.3	8160.91	14052.7	12176	3844.72	8050.53	9114.59
Nckap5	77.0934	-2.86516	0.979349	-2.92558	0.00343814	0.0309476	11.7122	39.9611	18.423	14.0604	2.89161	71.2589	43.7452	170.271	30.2905	53.6158	42.9406	40.6089	196.282	392.246	28.0928
Peo1	1036.12	0.527705	0.180409	2.92504	0.00344408	0.0309815	1156.87	1100.4	1124.64	1193.4	1007.34	1399.83	936.375	1021.78	872.276	1014.74	1173.76	1042.62	749.295	699.913	1048.5
Mettl7a1	98.6654	-1.89876	0.649343	-2.92413	0.00345425	0.0310338	59.1697	75.8169	52.9831	32.9148	49.6641	35.6897	37.6222	320.015	73.2236	131.595	79.5931	90.6197	144.479	227.203	69.394
Rab35	2573.56	-0.383129	0.131016	-2.9243	0.00345234	0.0310338	2037.42	2453.52	1908.07	2467.99	2289.03	2217.19	3035.83	2822.13	2900.59	2826.3	2213.26	2336.7	3138.44	2935.47	3021.51
RP23-293I7.1	38.6652	2.60491	0.890936	2.92379	0.00345795	0.0310475	42.8471	46.3325	89.9713	33.8552	91.8317	50.5604	43.8926	20.5797	54.9177	27.2937	25.8917	22.9039	1.99281	0	27.107
Sema5a	1083.42	1.86045	0.636428	2.92326	0.00346385	0.0310809	1557.8	1312.05	443.858	884.937	3915.97	918.019	473.413	1864.52	1082.79	691.116	1003.06	528.781	396.569	330.574	847.908
Ssbp3	3272.19	-0.75818	0.259494	-2.92177	0.00348048	0.0312105	2670.58	3055.94	2423.88	1784.34	3356.71	2446.71	2677.16	3809.16	5278.82	3089.69	2835.07	2820.89	4324.47	4091.08	4418.35
Anapc5	3144.8	-0.492742	0.168819	-2.91876	0.00351422	0.0314932	2633.05	2837.87	2335.25	2974.55	3354.67	2695.56	3995.27	3003.61	2730.32	2993.54	2467.39	2451.71	4349.3	4386.84	3963.05
Lpin3	219.267	1.68267	0.576665	2.91793	0.00352361	0.0315378	290.196	137.136	243.276	342.826	410.578	157.699	485.597	162.56	229.982	108.749	196.054	240.608	169.439	79.5419	34.7657
Matn2	808.992	1.03305	0.354033	2.91796	0.00352334	0.0315378	1068.03	1596.23	827.677	682.918	1586.29	560.058	877.864	862.508	932.005	568.196	642.401	547.84	382.715	528.837	471.314
Tnfrsf9	39.2593	2.96456	1.01608	2.91764	0.00352686	0.0315471	52.5666	3.89552	17.0807	39.161	46.2712	47.641	107.149	20.0823	7.4808	87.7843	69.5641	72.5236	1.55635	13.1792	2.95398
Pola2	2272.04	0.33056	0.113339	2.91657	0.00353898	0.0316158	2252.59	2461.29	2226.17	2461.87	2571.14	2712	2217.11	2453.07	2099.62	2315.9	2267.05	1884.18	2097.16	1953.09	2108.41
Ppil1	2589.3	0.562608	0.192889	2.91675	0.00353702	0.0316158	2948.86	2385.43	3196.9	2652.03	2790.47	3276.52	2962.07	2589.44	2307.69	2071.87	3092.77	2661.73	1675.83	2050.71	2177.25
Spire1	1868.29	-0.771567	0.264626	-2.91568	0.0035491	0.0316863	1797.06	1599.17	2129.8	1369.79	1210.67	1309	2100.36	1259.54	2236.62	2754.63	1572.85	2045.26	2376.62	1717.32	2545.68
Il17rc	390.375	-1.24059	0.425663	-2.91449	0.00356266	0.0317784	173.429	363.289	191.939	141.063	468.529	266.681	359.501	520.667	239.807	431.826	292.481	335.592	580.903	763.444	726.469
Trip13	1404.86	0.573649	0.196834	2.91439	0.00356387	0.0317784	1331.32	1678.5	1097.65	1752.95	1576.13	1992.68	1240.49	1270.8	1642.95	1216.52	1313.77	1383.2	1041.24	1130.63	1404.14
Dnph1	1099.58	0.635607	0.2182	2.91296	0.00358025	0.0319045	1284.39	1057.22	1612.49	1240.42	1037.32	1248.15	1360.67	1098.96	878.683	946.507	1070.19	1389.17	738.335	755.906	775.261
Rps6kb2	503.997	-0.707206	0.242856	-2.91203	0.00359085	0.0319784	558.539	401.115	590.103	406.921	407.63	406.686	361.236	592.502	367.154	544.875	449.709	479.442	594.189	832.59	567.264
Tmem63a	1662.22	-0.883893	0.303551	-2.91184	0.00359303	0.0319784	1322.57	1438.63	856.222	1124.57	1723.75	1203.47	1211.15	1999.88	1736.8	2085.6	1435.7	1319.26	3055.56	2673.49	1746.66
Btbd3	1415.69	0.893126	0.306747	2.91161	0.00359575	0.0319827	1382.24	1715.09	1580.01	1529.78	1011.58	2268.92	1631.91	1388.91	1247.25	2349.65	1228.74	1311.6	937.475	904.429	747.825
Gbe1	331.517	1.03701	0.356314	2.91039	0.00360982	0.0320878	306.602	355.871	592.735	515.125	361.403	348.884	296.237	261.935	391.509	215.446	456.956	272.151	210.337	140.047	247.513
Cacna2d1	693.975	-1.16562	0.40059	-2.90975	0.00361723	0.0321336	348.334	471.792	460.313	562.151	660.858	470.839	279.884	398.4	1018.38	841.968	521.979	574.736	1187.65	1596.45	1015.9
Fam199x	610.99	0.662739	0.227782	2.90953	0.0036197	0.0321356	610.06	592.846	608.806	884.937	872.401	844.656	327.104	349.855	574.805	756.426	536.055	563.635	640.687	523.32	479.252
Igf2bp1	2803.71	0.763435	0.262501	2.90831	0.00363388	0.0322213	2257.89	3234.54	2117.77	4072.56	2779.72	3235.74	3178.07	2884.94	4410.58	2772.73	2246.92	2921.06	1875.28	1493.56	2574.33
Sh3pxd2a	8109.7	-0.893182	0.307094	-2.9085	0.00363171	0.0322213	5874.7	6705.24	3639.57	8299.35	7752.41	5734.44	5283.66	8621.7	7261.12	10071.8	5722.79	6216.04	17014.7	12977.9	10470.2
Acot1	31.6873	2.12083	0.729564	2.90698	0.00364936	0.0322599	42.8471	36.8554	43.986	71.4721	30.9229	45.6035	33.442	11.3188	57.6636	11.6973	36.4402	18.9206	5.97842	4.30716	23.8542
Evx2	82.2915	-5.8078	1.99752	-2.90751	0.00364317	0.0322599	22.1936	5.72703	48.9328	11.0874	0	0	113.676	124.985	5.8077	190.855	0	86.6558	320.633	300.626	3.19246
Fbxo10	454.255	-0.933412	0.321019	-2.90765	0.00364154	0.0322599	297.736	427.423	257.95	282.791	446.384	382.729	342.26	485.07	456.001	551.417	395.906	364.677	1001.28	669.172	453.028
Gtf2i	5950.71	-0.370142	0.127338	-2.90677	0.00365181	0.0322599	5344.37	4440.69	4561.61	4845.61	5469.33	5813.84	6662.03	7728.29	6205.57	5934.94	5994.79	5414.84	6498.25	7124.94	7221.49
Pxmp2	88.3862	0.805474	0.277078	2.90703	0.00364879	0.0322599	103.903	78.7601	131.576	73.0193	79.4564	85.0913	123.398	98.4083	107.288	95.0698	102.607	111.349	39.6265	38.745	57.4951
Synrg	493.874	-0.815617	0.280575	-2.90695	0.00364967	0.0322599	342.862	380.746	249.809	362.729	396.174	453.267	457.086	572.467	744.652	545.415	312.873	457.241	871.496	734.372	526.917
Dnm1	2396.88	0.943493	0.324705	2.9057	0.00366437	0.0323508	3568.64	2794.24	3214.94	1889.17	4394.34	2989.18	2004.26	3556.13	2043.85	1253.4	1958.93	1465.61	2004.68	1451.72	1364.15
P2rx5	72.8894	-1.13616	0.391052	-2.90539	0.00366799	0.0323628	55.2091	89.5503	85.981	55.4375	56.8175	40.7824	62.6159	73.5855	82.4644	70.6508	22.7524	61.5903	128.067	118.628	89.2082
Stat2	841.94	-1.77296	0.610446	-2.90437	0.00367996	0.0324483	839.598	1358.39	302.902	295.293	447.914	482.803	647.938	1166.87	655.351	1047.88	198.503	995.821	1295.32	2255.87	638.642
Rxra	2066.93	-0.949703	0.32703	-2.90403	0.00368398	0.0324569	1419.06	2031.06	1094.05	1444.62	1862.04	1933.15	1243.65	3196.06	1710.23	1876.53	1531.98	1541.17	3557.07	3841.92	2721.3
Sdc2	5056.9	-0.765736	0.263692	-2.9039	0.00368548	0.0324569	4564.23	4925.99	4127.68	3914.04	4034.04	3762.29	3795.66	6414.7	3207.19	6649.92	5003.82	5543.74	7230.9	7977.93	4701.44
Samd10	88.6152	1.39029	0.478849	2.90341	0.00369128	0.0324878	84.9931	72.2478	123.828	87.1945	131.633	113.918	186.163	92.4069	73.8248	95.817	76.1726	63.4544	23.439	29.5517	74.583
Dtd2	311.456	0.76452	0.263389	2.90263	0.00370047	0.0325486	426.655	371.409	402.56	370.71	333.728	358.349	487.928	309.164	263.092	169.811	288.712	264.157	195.463	239.179	190.93
Golga3	2170.65	-0.76478	0.263637	-2.90088	0.00372115	0.0327103	1420.2	1996.87	1174.91	1616.12	2317.48	1682.27	1599.91	2369.2	2678.01	2592.26	1753.86	1817.12	3493.8	3055.18	2992.59
Mylk	104.269	-1.79013	0.617183	-2.90049	0.00372579	0.0327309	84.3617	65.5766	40.5154	99.2659	36.5846	54.8786	66.1144	196.077	74.0917	67.4493	74.8857	44.2964	312.892	289.164	57.8776
Hsd17b1	9.80001	-3.1431	1.08423	-2.89893	0.00374444	0.0328745	12.242	6.31807	7.99745	5.64253	0.937059	1.98276	3.13518	10.2899	6.40706	6.82343	9.58953	0	50.8166	17.2286	7.58997
Amfr	5365.47	-0.543918	0.187668	-2.8983	0.00375192	0.0329071	4990.1	4328.42	3627.98	5183.7	4188.65	4914.47	5084.38	6196.83	4917.07	5339.29	5800.29	5080.52	6060.37	8709.09	6060.85
Rae1	2879.88	0.537974	0.185621	2.89823	0.00375277	0.0329071	3273.11	2956.86	3494.78	3285.72	2870.97	3676.54	3287.11	2901.57	2816.49	2179.19	2805.65	2875.78	1980.06	1948.98	2845.44
Plekhh3	455.271	-0.690559	0.23839	-2.89677	0.00377031	0.0330204	400.46	344.478	474.138	351.887	391.637	447.031	385.219	427.657	386.41	480.087	482.7	336.817	680.579	793.736	446.228
Rest	1629.04	-0.38695	0.133576	-2.89685	0.00376928	0.0330204	1513.66	1362.74	1244.58	1636.45	1577.96	1608.61	1339.66	1544.49	1557.31	1759.32	1569.23	1415.6	2304.91	2142.12	1858.96
Gm9780	77.2731	-4.26701	1.4733	-2.89622	0.00377689	0.0330576	3.26556	8.08967	56.5165	2.37692	34.2747	0	92.2068	52.8303	88.279	7.38415	0.613922	116.787	101.964	536.244	58.2645
Cgnl1	3039.94	1.58034	0.545742	2.89576	0.00378243	0.0330858	5627.07	3247.15	1702.13	5979.41	1588.48	3860.56	3039.37	3110.65	1793.61	3820.42	5375.8	2631.82	2205.65	1010.14	606.816
Utp15	2264.28	0.460722	0.159167	2.89459	0.00379654	0.0331889	2246.41	2515.65	2253.28	2780.83	2398.87	2749.1	2099.53	2080.61	2390.75	2134.76	2161.48	2390.97	1620.15	1739.02	2402.77
Lrrtm2	78.8702	2.13073	0.736298	2.89383	0.00380568	0.0332311	72.4319	150.581	56.9818	90.2805	45.9159	99.1381	80.4697	92.6088	17.3906	145.242	148.638	129.457	1.99281	17.2286	34.697
Smoc1	111.251	-2.98733	1.03232	-2.89381	0.00380603	0.0332311	28.109	6.43388	37.0384	50.915	16.222	37.7236	44.9986	236.339	24.7465	286.607	49.803	18.2533	490.986	305.384	35.2104
Vmn2r11	11.8267	-2.94961	1.02	-2.89177	0.00383083	0.0334271	17.3429	16.8482	9.99681	1.88084	6.55941	0	5.2253	11.3188	8.23765	19.4955	1.91791	12.9457	27.8993	31.2269	6.50569
Mpp6	2030.27	1.1032	0.381617	2.89085	0.00384206	0.0335047	3009.38	2079.67	3621.47	2083.93	2092.86	2845.74	2707.99	1014.8	1540.81	1674.72	2227.8	2285.99	956.899	671.189	1640.86
Cldn3	5.99742	6.14228	2.12508	2.89038	0.00384774	0.0335311	5.10084	4.21205	24.992	28.2127	1.87412	10.9052	1.04506	0	3.66118	0	0	9.95821	0	0	0
Lxn	1852.87	-1.87824	0.649874	-2.89016	0.00385045	0.0335311	1156.47	1481.84	933.507	1208.01	634.058	898.568	1123.02	4352.18	556.113	2342.28	1384.42	1647.67	4954.02	4310.73	810.215
Psmb9	25.9186	-2.58526	0.894547	-2.89002	0.00385215	0.0335311	40.3446	36.6197	31.9447	1.37353	14.3704	3.56419	18.4224	67.0226	11.7181	17.5225	10.8168	14.5131	56.9834	54.0615	9.50184
Plk3	593.178	0.859216	0.297355	2.88953	0.00385821	0.0335633	630.865	557.854	761.43	954.07	723.718	594.803	651.842	356.302	558.439	434.041	847.501	573.777	363.301	450.755	438.978
H1f0	4108.62	-0.716695	0.248108	-2.88865	0.00386904	0.0336264	3411.44	3384.38	3145	3031.92	3748.23	3992.29	3761.17	5091.42	3177.9	4569.75	3410.04	3202.56	6357.05	7294.17	4051.96
Rnf128	272.353	-1.42228	0.492386	-2.88855	0.00387017	0.0336264	202.797	263.833	316.961	212.478	115.527	189.25	142.914	102.776	339.047	267.491	163.661	382.395	229.836	487.622	668.705
Psmc1	6501.02	0.537137	0.185968	2.88832	0.003873	0.0336305	8149.1	6702.42	8418.31	7036.24	6311.09	7131	7986.36	6266.53	5143.04	5512.36	7354.21	7391.98	4300.48	4920.93	4891.19
Gskip	690.912	0.52637	0.182303	2.88733	0.00388531	0.0337168	830.417	706.571	757.758	825.69	752.458	749.484	829.778	702.798	702.031	542.95	738.394	608.447	420.482	556.7	639.726
Coch	1216.93	-3.84182	1.33148	-2.88538	0.00390936	0.0339049	1017.76	301.237	1852.27	268.057	15.484	185.317	574.181	1403.81	61.4426	2640.77	575.398	2635.88	2683.15	4004.46	34.7136
Adamtsl1	47.6438	-1.97049	0.683105	-2.88461	0.00391894	0.0339629	30.3622	51.014	30.7888	39.0304	9.10562	10.4832	31.7333	96.1851	73.2098	59.4736	31.8119	27.081	101.512	97.2812	25.5851
Pde6h	27.7889	2.82477	0.979306	2.88446	0.00392081	0.0339629	79.1726	50.849	45.4934	81.0527	7.15784	22.3354	58.1593	11.8443	2.91317	9.80577	10.7566	21.8349	4.43984	3.42717	7.59222
Exosc4	1314.02	0.442614	0.153612	2.88137	0.00395945	0.0342767	1455.28	1581.02	1709.79	1372.84	1306.29	1506.2	1498.26	1425.37	1087.33	1134.39	1300.04	1253.46	915.587	1143.86	1020.57
Oas2	13.752	-6.18602	2.14718	-2.88099	0.00396425	0.0342975	6.06995	18.7961	0	0	0	0	8.61023	54.4011	2.58082	3.47992	0	74.8544	11.2381	21.7833	4.46669
Hs3st5	10.8597	2.98498	1.03651	2.87984	0.00397876	0.0344022	8.90676	26.547	35.7783	5.60675	40.9514	8.3311	2.33358	4.38198	9.27617	3.3209	4.65129	5.79613	3.86635	1.04457	2.10367
Cpsf3	2767.73	0.620614	0.21553	2.87947	0.00398339	0.0344213	3586.91	2831.55	3138	3329.09	2560.98	3500.57	3802.98	2705.2	2371.53	2017.79	2742.61	2821.16	1940.99	1908.07	2258.56
Apex2	1178.91	0.567134	0.197026	2.87848	0.00399595	0.0344672	1149.69	1328.68	1827.9	1332.1	1345.4	1330.24	1207.61	1115.98	1039.56	955.79	1205.49	1139.21	748.688	876.116	1081.23
Crem	383.56	1.14446	0.397573	2.87862	0.00399422	0.0344672	351.22	411.844	679.158	420.637	569.491	297.642	524.899	261.529	510.49	329.305	478.62	335.427	125.457	167.689	289.985
PCDHA9	266.086	-2.87455	0.99861	-2.87856	0.00399501	0.0344672	104.554	340.864	121.525	85.1862	157.924	44.0242	264.429	262.264	165.34	48.1707	167.774	124.647	1946.91	141.983	15.6895
Cacna1h	262.093	-4.36742	1.51745	-2.87814	0.00400026	0.0344755	17.8833	41.4219	4.69864	17.3693	9.21517	122.212	4.91195	327.461	36.0174	50.0804	37.722	200.243	1091.64	1960.67	9.84509
Rnaseh2a	1274.11	0.849389	0.295129	2.87802	0.00400175	0.0344755	1512.81	1129.61	1879.16	1110.42	1815.86	1334.34	1793.47	1148.69	975.679	969.173	1550.56	1527.15	726.952	753.052	884.8
Sc5d	2589.92	0.444819	0.154578	2.87764	0.00400662	0.0344966	2559.62	2972.43	2224.63	2657.27	3444.87	2762.95	2515.01	2413.76	2593.03	2821.16	2422.18	2948.75	2321.51	1948.73	2242.91
Psap	22592.7	-0.505059	0.17553	-2.87733	0.0040105	0.0345092	22279.2	22204.5	20446.8	21894.9	19667.3	15547.9	24433.6	25778	17204.7	21558	22801.7	24024.1	27076.7	29193.3	24780.1
Rxrg	18.0571	5.00518	1.73986	2.87677	0.00401766	0.0345499	2.48409	36.5454	49.6971	1.71474	86.715	3.61531	0.952767	1.87622	74.0971	2.25536	3.49705	4.6081	1.81681	0.981693	0
Hs3st3a1	48.751	-2.7992	0.973493	-2.87542	0.00403487	0.034677	17.3429	45.2795	39.9872	15.0467	23.4265	9.91381	22.9913	27.7826	140.955	6.82343	5.75372	38.837	21.9209	46.302	268.902
Pdgfb	70.4854	-3.062	1.06504	-2.87501	0.0040402	0.034681	22.4437	10.5301	15.9949	17.868	1.87412	51.5518	99.2808	47.3334	33.8659	41.9154	18.2201	101.574	75.7267	506.091	13.0114
Pnpo	262.883	0.681813	0.23714	2.87516	0.00403828	0.034681	404.177	284.273	321.426	345.394	230.771	281.96	292.468	284.77	195.475	216.006	265.291	286.234	170.15	171.855	193.003
Tomm70a	9152.8	0.632772	0.220121	2.87466	0.00404466	0.0346984	10195.6	10666	11045.5	11683.8	9885.97	10522.5	9608.29	5891.97	9630.73	7164.6	10286.7	10013	6921.02	5666.07	8110.43
Emc2	1491.64	-1.00158	0.348629	-2.8729	0.00406717	0.0348706	1550.66	1268.88	1615.48	959.23	808.681	1220.39	1080.59	2216.44	950.076	1976.84	1194.86	1549.5	1836.37	2768.43	1378.12
Bves	20.1714	-2.72809	0.949884	-2.87202	0.00407856	0.0349472	25.5042	6.31807	29.9904	13.1659	1.87412	2.97414	7.31543	33.9565	17.3906	7.7982	5.75372	30.8705	15.9425	53.8395	49.877
Alas1	1085.81	0.503578	0.17539	2.87118	0.00408939	0.0350189	1163.2	1133.7	1169.49	1156.12	1012.3	1185.82	1332.38	1101.74	1146.85	876.097	1415.26	1228.2	738.718	782.28	845.019
AA415398	33.9834	-1.20681	0.42038	-2.87076	0.00409482	0.0350354	35.8287	38.5233	21.8626	32.4834	21.7872	17.4888	32.6999	20.1254	45.1958	26.8721	25.6313	29.333	46.48	49.5859	65.8539
Esx1	5.86976	5.41311	1.88567	2.87065	0.00409623	0.0350354	4.30708	0.889149	13.2505	6.35263	6.21023	32.9361	15.307	0	3.033	0	1.61945	3.29983	0.841349	0	0
Cst3	10622.9	-1.31963	0.460103	-2.86812	0.00412923	0.0352965	7466.83	9221.22	12291.5	6002.46	4278.45	7836.22	16157.2	17666.4	4741.49	10330	6459.46	11672	17579.1	19930.8	7710.74
Entpd3	10.2156	-4.66902	1.62815	-2.86768	0.00413493	0.035324	8.27212	0.844923	1.60426	1.50916	0.751883	1.59094	0.838543	28.8976	1.46884	0.782147	0.769451	8.07471	8.07943	88.8805	0.870013
Col3a1	24769	-1.55159	0.541142	-2.86726	0.00414044	0.03535	13222	22781.7	7111.69	11914.5	21248.2	17224.5	9937.08	55039.2	17262.5	14084.9	22688.2	11314.9	53046.8	58406.4	36253
Dst	10247.6	0.540478	0.188584	2.86598	0.00415718	0.0354436	11014.4	10631.3	9709.52	11951.5	14878.8	11550.8	8344.33	6635.58	10517.5	12760.7	9688.11	9642.16	8305.05	9058.84	9025.69
Ints10	1484.17	0.546886	0.190828	2.86585	0.00415887	0.0354436	1541.65	1305.53	1547.61	1520.61	1946.82	1732.98	1417.68	1743.41	1536.24	1306.17	1633.94	1468.59	939.642	1122.14	1499.61
Slc11a1	14.7106	2.45878	0.857931	2.86594	0.0041577	0.0354436	22.1166	12.8347	4.53046	45.7853	10.109	10.7339	9.8259	8.97591	25.1932	20.2188	15.5614	22.6322	4.05612	1.87858	6.20709
Nudt10	7.24569	4.2267	1.47508	2.8654	0.00416477	0.0354727	10.2017	1.05301	18.9939	21.6297	12.1818	5.94829	9.40555	3.08696	6.40706	0.974776	7.67162	8.96239	0	0	2.16856
Prkce	329.791	-0.666929	0.232805	-2.86475	0.00417338	0.0355248	246.108	313.983	227.66	287.671	378.878	259.467	252.962	324.692	284.401	318.873	301.668	278.672	617.608	483.341	370.878
Asxl3	82.6968	1.65741	0.578612	2.86445	0.00417728	0.0355367	98.2286	61.6708	144.88	179.233	53.9497	53.1409	84.0274	92.9491	148.096	46.4451	97.0939	89.9533	19.7815	21.4923	49.5102
Lmo4	2903.65	-0.422226	0.147454	-2.86344	0.00419065	0.0356293	2767.58	2554.01	2802.37	2600.27	2806.99	2542.02	2989.25	2350.85	2839.65	3289.83	2827.9	2531.47	3277.73	4085.68	3289.15
Btn2a2	9.40029	2.87089	1.0028	2.86287	0.00419821	0.0356619	7.62806	14.7631	7.00516	30.764	11.2566	7.46757	16.7386	6.62844	8.8441	2.09308	15.4433	5.58451	2.13952	1.15606	3.49232
Fahd1	197.847	0.624643	0.218195	2.86277	0.00419949	0.0356619	194.852	193.754	245.921	191.846	280.18	239.914	227.823	180.073	160.177	171.561	219.6	200.16	147.468	165.826	148.547
C1qbp	6827.78	0.725812	0.253694	2.86097	0.00422343	0.0358012	8101.29	6801.81	10704.6	8230.05	5369.05	7962.69	9110.97	6611.54	6308.37	5271.14	7503.83	7403.73	3741.27	4030.67	5265.72
Grid2	81.9996	1.34837	0.471257	2.86123	0.00421998	0.0358012	91.4525	143.441	68.5391	128.605	88.0467	38.5193	96.7452	75.6357	95.7813	98.5885	70.4697	134.053	37.0179	41.4832	21.6151
Hsd11b1	8.08401	3.98925	1.39429	2.86113	0.00422129	0.0358012	6.9577	2.31199	0.973996	11.9114	16.4337	5.29913	9.1639	35.9446	6.24245	7.81556	11.2118	4.82986	0	0	2.16403
Hoxc12	5.62908	-6.19965	2.16761	-2.86014	0.00423455	0.0358741	0	0	0	0	0	0.991381	2.09012	2.05797	2.74588	0	0	0.995821	0	49.5323	26.0228
Cyb561d2	254.918	-0.595754	0.208404	-2.85865	0.00425448	0.0360027	281.647	240.428	251.573	164.386	193.12	200.392	322.974	356.897	250.705	238.602	204.116	276.61	304.607	310.034	227.673
Prdx6	10739.7	0.997161	0.348848	2.85844	0.0042573	0.0360027	12786.1	11854.5	14546.1	16612.1	8188.55	12118.6	16947	7681.42	12003.3	8270.4	10974.8	10616.2	4324.75	4969.79	9201.92
Slc52a3	16.5353	-2.24901	0.786766	-2.85855	0.00425576	0.0360027	6.22286	18.3267	9.66584	4.58914	9.14546	12.0945	7.22997	26.8628	11.5049	1.1892	3.70882	13.9808	34.5063	56.487	32.5153
Kremen1	1143.51	-0.842391	0.294766	-2.85783	0.0042655	0.0360506	805.524	1243.92	847.956	814.253	1164.77	867.798	627.753	1052.72	1263.1	1098.26	1067.75	1194	1361.94	1447.85	2295.07
F3	2059.29	-0.676197	0.23669	-2.85689	0.00427816	0.0360848	1952.6	2239.76	1680.46	1344.8	2050.28	1226.34	1969.94	1658.73	2081.38	2179.6	2116.41	3004.39	2958.32	2129.89	2296.51
Foxo1	730.154	-1.79715	0.629012	-2.8571	0.00427534	0.0360848	371.341	354.865	277.911	802.18	246.446	374.742	400.258	824.218	209.602	1128.79	325.085	690.104	1695.88	2774.89	476
Nynrin	1194.9	-1.64427	0.575568	-2.85678	0.00427966	0.0360848	536.143	1032.11	514.389	299.734	1172.39	558.654	811.308	2516.77	1638.94	1547.57	482.893	464.645	2700.33	2332.45	1315.18
Rrp9	2935.23	0.84598	0.296113	2.85695	0.00427733	0.0360848	3287.84	3232.22	4221.3	3584.6	2552.17	3732.31	4906.49	2199.08	2502.44	2206.43	2848.06	3264.95	1642.76	1732.18	2115.57
Ccdc126	159.248	-0.71064	0.248808	-2.85618	0.00428767	0.036131	153.025	172.694	147.953	101.566	148.992	125.905	148.399	100.841	186.72	173.51	151.515	161.323	189.317	190.592	236.373
Zmynd19	2037.46	0.501444	0.175581	2.85592	0.00429124	0.0361397	1994.82	2172.25	2016.81	2550.36	2044.97	2727.43	2288.53	1839.23	1826.76	1783.02	2202.82	1942.56	1488.24	1597.24	2086.88
Plxnd1	436.977	-1.38367	0.484565	-2.85549	0.004297	0.0361668	333.571	270.591	140.032	294.352	302.352	308.387	218.069	945.342	378.848	400.214	382.601	218.853	1092.52	759.853	509.07
Fuca1	1012.79	-0.870864	0.305089	-2.85446	0.00431102	0.0362547	977.084	780.05	1358.47	625.679	656.521	651.569	1352.94	1162.67	867.218	1085.92	992.809	1144.42	1254.82	1620.35	661.384
Slc25a20	889.97	0.361928	0.126799	2.85435	0.00431252	0.0362547	993.958	1032.65	1082.98	858.155	931.08	905.901	982.019	830.975	945.558	809.966	946.092	932.84	668.739	792.387	636.25
Akap8	3986.67	0.341078	0.119565	2.85265	0.00433561	0.0364273	4156.16	3910.89	3765.8	4452.9	4356.38	4627.77	4068.42	3775.35	3670.33	3645.66	4479.27	4283.03	3457.52	3164.68	3985.82
Basp1	6400.87	-0.420191	0.147343	-2.85179	0.00434741	0.0365049	5899.63	6641.35	6590.9	5352.88	5210.05	6448.93	5915.05	6041.18	7477.96	5587.41	5968.52	6115.34	6460.68	7961.78	8341.38
Itpkb	729.65	-0.93174	0.326772	-2.85135	0.00435346	0.0365342	424.191	682.032	384.697	579.748	689.495	590.586	628.183	1125.57	854.837	670.703	302.295	464.831	1441.5	1166.03	940.049
Gpr50	9.3084	4.62832	1.62372	2.85044	0.00436589	0.0365955	5.09653	3.88622	7.3788	12.7565	3.45828	26.1786	42.5278	0.734369	10.1339	2.08704	5.4751	18.3758	0	1.53697	0
Hadh	2184.46	0.327265	0.114809	2.85053	0.0043647	0.0365955	2407.41	2597.48	2530.45	2437.35	2254.69	2400.53	2053.83	2288.45	2087.86	1841.3	2269.58	1944.05	1703.12	2044.1	1906.64
Rnaseh2b	886.612	-0.509021	0.178601	-2.85005	0.00437122	0.0366186	956.416	656.782	975.099	708.785	755.015	632.035	1004.47	1083.97	784.321	904.571	912.803	942.469	973.03	987.584	1021.83
Prodh	73.6622	1.40213	0.492202	2.8487	0.00438988	0.0367533	109.359	99.3791	91.3316	74.5343	33.8963	125.822	143.386	61.8344	80.0457	48.9656	73.1747	75.3634	27.8292	22.1894	37.8222
Tbx3	926.886	1.0094	0.354462	2.84768	0.00440387	0.0368488	524.36	520.262	491.286	946.866	1645.84	1802.95	959.188	943.778	1334.04	957.726	1163.04	430.609	971.242	599.416	612.677
Arhgap20	122.118	-1.82978	0.642774	-2.8467	0.0044175	0.0369412	56.2506	101.692	18.3737	68.1141	83.5781	71.0623	44.1778	173.993	90.0013	177.367	96.938	59.4838	346.671	334.466	109.607
Tipin	2860.75	0.586884	0.206181	2.84645	0.00442095	0.0369484	3039.08	2816.81	3707.82	3057.31	2910.5	3529.32	3974.37	2371.81	2766.94	2601.68	3025.5	2787.3	2179.13	1779.93	2363.73
Cdon	1279.7	-1.53853	0.540684	-2.84553	0.00443371	0.0370116	520.921	712.49	304.485	767.859	1285.28	620.689	682.383	2951.8	1049.73	1216.7	795.106	520.384	3511.35	2975.32	1281.08
Kdelr1	2041.34	-0.72451	0.254611	-2.84556	0.00443334	0.0370116	2175	1915.43	2168.31	1322.23	1786.03	1755.74	1749.43	2533.36	1399.49	1765.32	2018.6	1994.63	2993.2	3214.22	1829.18
Anxa6	12078.8	-0.627932	0.220789	-2.84403	0.00445465	0.0371646	11580.5	9335.84	10957.6	6902.39	12356.6	8329.35	13918.5	12330.8	13559.2	11538.7	14932.7	12805.4	12626.1	17261.1	12747
Itga6	3558.21	0.940545	0.330803	2.84321	0.00446611	0.0372385	5198.9	4959.45	5358.43	3453.22	4316.03	4073.02	2829.88	2457.79	2291.65	1714.81	5526.21	5023.26	1687.3	2381.37	2101.89
Mlph	21.1019	1.48856	0.52367	2.84255	0.00447546	0.0372946	23.1573	28.8826	34.9838	34.689	19.4982	20.6285	20.5175	13.6252	14.7168	19.361	33.5586	26.372	12.2513	10.1844	4.1021
Mfn2	3270.33	-0.582483	0.204957	-2.84197	0.00448358	0.0373404	2849.75	3731.72	2022.95	2980.05	2666.46	2403.88	3173.66	3289.73	4006.07	3444.38	2967.49	3463.52	3902.6	4044.76	4107.97
Atic	8171.39	0.530705	0.186826	2.84064	0.00450237	0.0374751	8507.77	8852.03	7624.19	11050.1	7264.71	10401.6	9238.22	7937.91	9192.99	7405.27	7268.55	7949.34	6108.35	5639.99	8129.85
Osbp	2226.01	-0.611279	0.215239	-2.84	0.00451135	0.0375279	1755.71	2192.37	1809.42	2013.44	2073.71	1856.86	1737.94	2291.55	2040.19	2889.23	1737.62	1911.98	3285.14	3355.28	2439.63
Invs	462.92	-0.639437	0.225177	-2.83971	0.0045155	0.0375405	358.282	474.931	325.443	412.527	442.914	353.148	453.997	476.876	551.362	438.568	396.513	376.676	798.075	626.025	458.462
Il1rap	2318.03	1.2787	0.450398	2.83904	0.00452488	0.0375966	1726.22	3992.64	2153.43	2790.68	4419	2222.59	2053.11	1016.73	4242.81	2304.3	2229.71	1731.43	1189.91	1108.78	1589.11
Mib2	465.773	-0.669512	0.235912	-2.83798	0.00454002	0.0376834	477.944	469.065	411.165	361.205	386.113	368.166	372.241	493.769	438.778	589.318	391.554	452.471	800.914	521.394	452.496
Wdr48	2368.59	0.324257	0.114258	2.83794	0.00454061	0.0376834	2172.96	2512.49	2145.31	2375.51	2756.83	2740.18	2650.27	2462.36	2653.44	2351.16	2341.76	2079.27	2176.15	1922.07	2189.16
Zfp568	873.162	-0.713014	0.251264	-2.83771	0.00454383	0.0376882	588.911	713.467	440.398	888.701	871.552	692.315	686.84	880.48	938.92	958.034	668.63	749.132	1597.51	1456.6	965.937
Proser2	19.4972	1.56426	0.551923	2.83421	0.00459393	0.0380686	24.493	21.0707	21.4045	52.8802	36.1463	24.629	4.05537	10.0745	6.13363	14.02	25.0369	14.1184	7.00487	19.7111	11.6788
Sssca1	1500.07	0.752834	0.265631	2.83413	0.00459504	0.0380686	1855.24	1643.66	2407.5	1867.83	1243.63	2112.05	1593.79	1464.33	971.636	1197.91	1553.53	1490.37	806.499	1089.74	1203.34
Ruvbl1	4238.24	0.688331	0.243061	2.83193	0.00462678	0.0383093	4814.55	4554.58	5544.69	4381.64	3937.34	6077.77	5633.34	4152.3	3698.57	3489.95	4259.35	4095.08	2415.67	2571.87	3946.88
Ptplad2	221.386	-1.633	0.576683	-2.83171	0.00463	0.0383137	129.772	131.965	159.029	83.4109	135.003	130.931	161.244	96.8389	588.971	341.109	116.305	162.781	365.936	232.214	485.277
Gbf1	2647.59	-0.486254	0.171787	-2.83055	0.00464673	0.0384299	2933.67	2012.66	2605.61	2157.99	2342.25	2528.5	2083.1	2927.81	2493.76	2656.61	2790.13	2336.48	3313.81	3404.8	3126.58
Barx1	15.7757	5.38541	1.90313	2.82977	0.00465821	0.038484	4.08067	1.05301	0	3.76169	4.68529	202.242	7.31543	0	2.74588	0.974776	4.79477	0	4.98202	0	0
Ftsj3	6623.35	0.574179	0.202909	2.82973	0.00465868	0.038484	8799.33	6564.05	7303.84	8203.19	5713.58	7744.08	6746.77	6335.28	6819.65	5902.48	7224.69	7444.17	4009.42	4422.22	6117.53
Pard6b	298.239	1.04897	0.370786	2.82904	0.00466874	0.0385448	380.523	358.024	347.889	426.011	211.775	427.285	400.258	269.594	171.16	319.726	270.425	376.42	219.209	104.449	190.834
Arfgap1	2504.67	-0.528332	0.186768	-2.82881	0.00467217	0.0385508	2306.84	2312.39	2093.14	1830.75	2411.87	2457.51	2054.82	2832.76	2128.64	2506.95	2503.37	2468.25	3737.65	3385.45	2539.63
Snta1	610.839	-1.56379	0.552892	-2.82839	0.00467834	0.0385794	337.5	238.909	489.588	326.156	289.4	467.735	533.748	834.894	268.956	780.002	803.367	590.214	1628.31	1337.56	236.25
Dip2b	1056.56	-0.835798	0.295771	-2.82583	0.00471588	0.038844	792.579	916.762	568.489	828.653	1002.62	822.512	669.065	1482.65	1267.9	1122.68	800.564	837.499	1885.88	1593.4	1257.16
Mitf	298.484	0.805544	0.285059	2.82589	0.00471497	0.038844	429.404	320.744	320.266	263.274	410.125	382.193	285.357	360.085	188.571	384.306	247.665	281.728	225.907	188.937	188.698
Ccdc107	536.713	-0.806846	0.285605	-2.82504	0.00472743	0.0389166	558.86	443.172	825.678	371.261	347.051	418.43	613.366	508.768	392.606	535.692	497.488	549.955	678.078	865.108	445.179
Phf19	775.765	0.844847	0.299104	2.8246	0.00473403	0.0389317	837.021	676.442	551.217	659.972	910.984	1156.32	900.232	1092.41	748.122	1201.2	748.582	635.794	581.98	394.471	541.731
2020-09-05	733.145	-1.09786	0.388684	-2.82455	0.00473471	0.0389317	511.104	562.309	502.839	368.645	980.163	383.664	618.676	531.986	872.276	766.174	775.793	415.257	1573.32	1244.77	890.195
Mthfr	1153.36	-0.687941	0.243604	-2.82401	0.00474268	0.0389747	937.163	1127.79	767.492	890.718	1275.88	838.136	834.262	1128.55	1307.96	1275.19	1086.71	990.885	1926.42	1582.89	1330.38
Rfx7	1644.96	0.638137	0.226027	2.82328	0.00475345	0.0390407	1538.11	1722.27	1621.29	2073.67	2666.18	1816.9	1356.25	1163.58	1677.45	1927.57	1431.48	1466.92	1721.15	1064.88	1426.7
Egflam	31.1161	2.01242	0.712962	2.82262	0.00476337	0.0390997	29.6013	68.7736	42.6038	22.171	41.6344	32.3615	35.0616	24.2589	48.5512	46.3203	36.5205	14.4474	0.903492	9.76851	13.7645
Tmeff1	986.607	-1.21369	0.430069	-2.82208	0.00477138	0.0391429	554.919	584.499	705.719	938.03	450.042	1069.56	628.204	912.098	856.426	1214.18	652.301	533.819	3012.94	1744.67	941.689
Gper1	13.8782	-2.93491	1.04006	-2.82187	0.00477442	0.0391453	1.67663	2.59591	0.821479	6.16644	6.16015	3.25863	3.43508	26.2124	2.25641	12.7834	14.1842	9.81968	71.8687	41.5876	5.34599
Tspan15	131.851	1.34766	0.477916	2.81987	0.00480427	0.0393674	194.852	77.9229	92.9703	232.284	170.545	168.535	176.615	126.565	54.9177	181.308	183.16	93.6072	81.7051	49.5323	93.2482
Rheb	3357.33	-0.42948	0.152334	-2.81934	0.00481229	0.0394104	2747.7	2971.22	3318.34	3277.09	2552.15	2619.2	3791.05	3388.8	3425.62	3805.04	3121.56	3963.22	3399.78	3764.44	4214.68
H2afy2	1488.09	-0.668866	0.237263	-2.81908	0.00481608	0.0394188	1632.27	1239.4	1477.53	1120.98	1452.44	1171.81	1248.85	2304.93	1485.52	1100.52	1247.6	885.285	2104.4	2086.82	1763.04
Tlr2	392.055	-1.11079	0.394082	-2.81869	0.00482198	0.0394445	318.292	306.427	180.942	345.135	342.963	201.25	311.428	670.899	297.471	332.398	327.962	324.638	606.81	927.116	387.089
Acap3	1299.01	-0.673354	0.238942	-2.81807	0.0048314	0.0394537	1083.34	1379.38	1034.07	1163.44	1003.84	1028.36	1027.6	1108.71	1945.22	1182.63	1035.26	1396.94	1642.06	1680.12	1774.14
Gdf7	110.041	3.66541	1.30058	2.81829	0.00482799	0.0394537	83.6538	142.157	25.9917	47.9615	38.4194	132.845	34.487	22.6377	5.49177	995.246	30.6865	73.6908	0	0	17.3485
Inpp5b	1043.61	-0.772184	0.273998	-2.81821	0.00482929	0.0394537	1038.95	763.931	1107.14	761.714	889.414	963.431	808.084	808.819	1083.32	999.429	919.831	1043.37	2227.22	1067.24	1172.24
2810006K23Rik	297.556	-0.462405	0.164106	-2.81772	0.00483655	0.0394731	255.957	261.149	283.78	212.484	207.158	287.59	364.649	306.597	367.945	328.542	295.248	318.768	336.861	313.462	323.156
Lrrcc1	468.002	-1.14661	0.406971	-2.81741	0.00484123	0.0394887	417.045	360.604	399.728	405.608	476.86	241.256	138.692	188.539	406.581	630.244	298.068	568.744	1061.23	648.686	778.15
Suv39h1	3583.81	0.641115	0.22761	2.81673	0.00485155	0.0395502	3254.01	4307.43	3005.23	3440	3546.21	5969.04	4175.55	3649.74	4262.13	3217.35	3561.9	3061.44	2485.28	2655.44	3166.35
Prkab1	1847.33	-0.519241	0.184375	-2.81623	0.0048591	0.0395892	1777.56	1574.3	1806.76	1547.85	1532.02	1722.63	1695.91	1973.04	1864.53	1729.53	1808.26	1794.15	2110.71	3026.12	1746.62
Srpk1	3378.47	0.433522	0.153989	2.81529	0.0048734	0.039683	3177.75	3646.37	3360.99	3989.91	3138.49	4337.75	3642.98	3119.8	3701.08	3150.37	3642.29	3279.4	2930.82	2455.39	3103.66
Arg1	27.9577	-3.42792	1.2184	-2.81345	0.00490127	0.0398871	13.2622	10.5301	14.9952	4.70211	6.55941	7.93105	3.13518	36.0145	2.74588	11.6973	7.67162	93.6072	4.98202	176.594	24.9385
Sesn2	604.693	-0.825691	0.293597	-2.81233	0.00491843	0.0399978	558.032	573.892	467.851	573.657	449.788	504.613	406.529	371.464	605.925	624.831	717.297	508.865	1325.22	781.749	600.692
Zscan12	273.75	0.507357	0.180413	2.81219	0.00492047	0.0399978	337.577	257.761	251.64	276.802	328.084	279.858	292.832	298.315	276.733	268.821	303.601	311.479	193.796	183.869	245.081
Arfip1	2316.05	-0.423502	0.15061	-2.81192	0.00492466	0.040009	2027.76	2149.61	1956.82	2380.56	2161.3	1830.79	2013.88	1909.4	2459.46	2726.99	2349.87	2227.61	3097.85	2583.15	2865.7
Btg1	3273.92	0.542879	0.193098	2.81141	0.00493247	0.0400496	3872.56	3544.44	3754.8	3667.65	2997.65	4186.6	3210.43	3039.63	2009.07	3529.66	4130.21	3717.4	2354.5	2301.1	2793.11
Lhx2	185.242	-4.34028	1.54472	-2.80976	0.00495789	0.0402332	10.6131	32.8645	70.0019	41.6283	1.14612	72.1956	16.6168	37.7567	11.0498	11.7679	3.98901	144.386	188.455	2123.07	13.0899
Cdo1	360.37	-1.82842	0.651033	-2.8085	0.00497734	0.040368	139.763	335.911	360.885	72.4125	358.893	161.595	258.13	441.435	357.88	138.418	230.149	444.136	351.73	1424.59	329.622
Zbtb2	741.799	-0.340918	0.121411	-2.80797	0.00498545	0.0404108	722.055	706.016	632.97	738.622	679.479	654.7	691.204	776.019	645.055	732.185	712.569	810.247	859.965	825.738	940.16
Il34	76.0691	2.22811	0.793949	2.80637	0.00501035	0.0405895	82.0973	31.4113	93.551	129.484	164.292	164.27	30.5647	44.2846	43.4862	7.615	196.365	56.58	28.1277	53.3699	15.5382
Soga3	18.547	3.15774	1.1253	2.80613	0.00501409	0.0405968	8.16134	10.5301	6.99777	20.6893	28.1118	26.7673	18.8111	13.3768	121.734	8.77298	5.75372	0	1.99281	0	6.50569
Tnmd	6.43757	-4.3572	1.55319	-2.80533	0.00502651	0.0406742	3.0605	5.26506	0.999681	0.940422	1.87412	0	0	5.14493	1.83059	0	17.2612	1.99164	13.9496	30.1501	14.0957
Cpne7	14.6398	3.1695	1.12999	2.8049	0.00503326	0.0407058	6.93371	13.5921	15.2542	30.3294	19.4497	34.5303	32.5397	16.1102	1.71641	7.3118	28.911	3.01832	6.61174	0	3.28806
Ifitm1	266.371	2.66757	0.951594	2.80327	0.00505878	0.0408889	113.393	176.462	54.9679	74.3878	87.9903	713.257	86.8932	366.605	51.5244	1566.52	187.735	377.994	13.362	75.0489	49.4207
Cmklr1	16.0839	-3.42552	1.2223	-2.80252	0.0050705	0.0409003	2.27049	21.1273	1.48326	2.12227	10.218	0.735473	7.75296	2.32213	20.6557	2.89262	21.7796	6.43764	22.9152	25.5627	92.9831
Imp3	1548.75	0.831366	0.296632	2.80268	0.00506799	0.0409003	1673.08	1725.89	2433.22	1465.18	1647.35	2063.06	2450.67	1323.28	1070.89	1187.28	1593.78	1688.91	860.893	988.493	1059.34
Pard6g	728.889	-0.70818	0.252673	-2.80276	0.00506678	0.0409003	503.963	525.453	787.748	609.393	604.403	640.432	762.895	731.609	707.523	968.927	590.715	471.023	1018.32	994.954	1015.97
Srpx	119.676	-2.70948	0.966828	-2.80245	0.00507166	0.0409003	31.882	99.3084	98.7757	7.25278	67.489	5.18368	37.8806	145.748	499.3	30.2978	141.985	91.228	64.1128	190.221	284.481
Slc27a4	1240.11	-0.562306	0.200673	-2.8021	0.00507717	0.0409216	988.606	1168.46	1030.55	913.203	1099.58	1266.12	1222.15	1488.55	1040.28	1176.89	1191.24	1174.5	1376.84	2046.16	1418.53
Batf	13.7309	3.05648	1.09102	2.80148	0.00508694	0.0409772	9.18151	11.5831	26.9914	10.3446	86.2094	27.7587	2.09012	4.11594	1.83059	4.87388	0	5.97493	0.996404	11.8447	2.16856
Nol10	2421.51	0.569852	0.203427	2.80126	0.00509037	0.0409817	2989.09	2711.51	2760.12	2937.88	2302.35	3055.44	2765.23	2006.52	2236.98	1797.49	2360.94	2810.21	1664.99	1733.63	2190.25
Bend7	17.759	2.91074	1.03925	2.8008	0.00509761	0.0410168	9.56409	30.915	16.4571	64.8959	3.95163	53.3158	31.3132	4.22299	6.41452	7.58151	4.04396	17.5724	4.80056	8.64921	2.68692
Aadat	30.0172	2.272	0.811627	2.79932	0.00512104	0.0411821	72.4319	29.4843	4.9984	31.0339	81.5241	46.5949	14.6309	9.26088	17.3906	49.7136	41.235	18.9206	4.98202	19.3822	8.67425
Ms4a4d	88.5298	-2.56455	0.916416	-2.79846	0.00513467	0.0412684	59.1697	108.46	102.967	14.1063	19.6782	18.8362	77.3345	125.536	375.271	22.4198	47.9477	44.8119	1.99281	99.0646	210.351
Mrpl34	757.013	0.717587	0.256485	2.79777	0.00514561	0.0413135	855.921	727.632	1115.64	744.814	963.296	857.544	909.203	787.174	563.822	627.755	965.666	676.163	416.497	603.002	541.057
Pfdn4	1602.85	0.651712	0.232942	2.79774	0.00514608	0.0413135	1716.16	1696.17	2248.58	1845.52	1600.41	1893.32	1953.83	1280.9	1533.46	1411.56	1644.76	1819.01	905.815	984.343	1508.91
Fam69a	393.575	0.746364	0.2668	2.79747	0.00515046	0.0413251	332.74	317.695	372.524	442.919	746.424	466.772	415.703	295.707	387.524	412.401	465.132	261.347	295.857	339.576	351.302
Tpm3	21640	0.402856	0.144017	2.79729	0.00515332	0.0413251	23875.1	23736.5	25014.3	22795.7	23982.5	23371.6	25756	17936.8	22907.1	18426	21430.8	22309.6	16689	16805.3	19564.1
Ccdc138	69.9071	-0.751358	0.268746	-2.7958	0.00517721	0.0414933	59.1697	62.1277	77.9751	53.604	53.4123	49.569	70.0191	67.9131	82.3765	84.8055	55.6193	68.7117	106.615	76.4521	80.2368
Zcchc18	97.2372	1.22311	0.437724	2.79425	0.00520203	0.0416688	198.967	109.175	121.806	78.3492	128.306	137.211	122.991	90.0363	167.573	29.4743	59.8702	67.2098	32.0583	72.6486	42.8824
Ints12	972.802	0.359742	0.1288	2.79303	0.00522168	0.0417793	909.404	990.198	792.014	1243.06	1090.73	1058.97	815.729	853.247	970.888	1121.02	1015.62	1087.96	830.879	885.5	926.807
Klrg2	59.6789	2.31867	0.830127	2.79315	0.00521978	0.0417793	45.9076	21.0602	128.959	190.906	96.517	37.6725	76.2895	14.4058	24.713	35.0919	50.8245	107.549	7.97123	21.5358	35.7813
Psph	1027.73	-0.456744	0.163564	-2.79246	0.00523094	0.0418299	1066.68	1004.18	1166.67	990.574	829.762	899.451	889.206	829.931	811.934	839.457	1216.29	1137.8	1339.84	1080.57	1313.66
Edc3	1453.27	0.333499	0.119499	2.79082	0.00525748	0.0420082	1494.1	1431.26	1335.35	1542.42	1560.85	1610.29	1686.23	1738.51	1319.77	1507.53	1395.79	1436.54	1291	1212.59	1236.81
Mettl2	743.659	0.448721	0.16079	2.79072	0.00525912	0.0420082	913.35	831.078	763.431	911.108	719.545	851.321	680.25	774.716	857.049	575.206	729.515	730.288	594.912	559.728	663.395
Bex1	55.8731	2.73214	0.979888	2.78821	0.00529994	0.0423105	171.408	43.8986	237.296	86.337	11.1167	29.9236	106.459	14.5678	38.7806	3.90746	25.0734	50.2419	3.25535	5.8633	9.96722
Clip1	2949.68	-0.672473	0.241268	-2.78724	0.00531592	0.0424143	2377.15	2462.55	2240.35	2292.55	2507.21	2020.48	2343.2	3064.78	2964.46	5170.09	2345.73	3586.16	3604.72	3403.58	3862.12
Kcnh7	13.0212	-2.27376	0.815903	-2.7868	0.00532311	0.042448	6.84581	8.07567	9.58333	11.7198	1.7966	5.70226	7.01285	14.5733	4.38718	6.5412	9.19289	16.2744	20.059	60.0403	13.5126
Vapb	3809.41	0.452428	0.16236	2.78658	0.00532675	0.0424532	3488.3	4099.5	3270.17	4669.69	3998.18	4553.09	4601.45	3872.19	4127.71	3408.41	3819	3570.27	2775.56	2909.77	3977.82
Acvr2a	613.296	-0.857063	0.307601	-2.78628	0.00533162	0.0424683	325.616	530.331	452.955	508.239	467.432	596.473	493.521	524.657	978.372	508.167	477.488	488.621	751.945	779.402	1316.22
Rhoq	3381.79	-0.571439	0.205114	-2.78595	0.00533711	0.0424883	2588.81	3160.28	2253.64	3065.49	3619.77	2646.36	2609.54	3137.1	3043.27	4390.15	3386.16	2959.05	5471.67	4129.73	4265.81
Prkcd	1196.78	-0.633272	0.227437	-2.78438	0.00536296	0.0426702	1143.71	1037.92	913.015	1116.46	995.687	927.061	1091.84	1459.85	1112.61	964.781	1462.83	1012.13	1789.59	1767.87	1156.36
Zbtb5	429.807	-0.732144	0.262985	-2.78398	0.00536971	0.0427001	294.232	365.184	283.732	319.556	413.108	374.241	354.793	458.178	576.462	511.697	334.399	323.33	773.418	573.309	491.469
Vav3	262.686	1.15838	0.416508	2.78117	0.00541632	0.0430468	243.299	403.013	410.53	250.666	388.398	194.578	415.837	262.549	252.056	336.901	118.63	289.563	88.0032	147.938	138.327
Cytip	18.0816	2.92535	1.05207	2.78057	0.00542634	0.0430891	12.9718	30.8966	10.6805	94.8009	16.1822	18.739	30.9247	9.19925	11.6453	4.38466	3.60256	9.25573	15.1924	0	2.74819
Pgrmc2	2737.05	-0.351386	0.126376	-2.78049	0.00542769	0.0430891	2756.9	2566.46	2582.11	2803.21	2151.28	2488.77	2808.79	2758.13	2387.05	2535.83	2946.43	2776.06	3044.15	3375.47	3075.05
Slc39a13	2104.45	-0.466768	0.167903	-2.77998	0.00543622	0.0431328	1555.46	1987.38	1578.42	1936.86	2033.93	2127.18	1585.43	2242.11	1667.87	2066.15	2144.56	2214.09	3112.12	2910.51	2404.63
Calu	29223	-0.60853	0.218913	-2.77978	0.00543952	0.043135	22199.3	32528.3	22223	20153	29911.9	23158.2	29515	29105.1	30747.1	30876.8	27687.2	28596.2	44081.8	39974.3	27587.6
Mtap7d3	28.1038	-2.20692	0.794476	-2.77783	0.00547229	0.0433707	37.9772	32.5072	40.8453	8.98597	5.3723	11.7018	9.98583	9.83223	16.6211	50.452	13.0604	63.2918	89.565	12.7099	18.6491
Sema5b	6.42521	-5.12054	1.84366	-2.77738	0.00547996	0.0434074	0.423369	3.5019	3.47902	0	0.388879	1.25161	0.8674	0	2.53542	0	0	24.854	5.68727	20.6114	32.7779
Csad	283.147	-1.30935	0.471541	-2.77674	0.00549071	0.0434684	319.313	251.67	239.923	141.063	182.726	125.905	205.877	557.71	170.245	311.928	338.51	287.792	399.558	558.854	156.137
Exoc3	1350.52	-0.891046	0.321156	-2.77449	0.00552877	0.0437454	1080.36	1128.83	1115.64	1115.34	1013.9	949.743	1223.77	2084.73	1058.08	1441.69	1022.24	1313.49	2040.63	2626.29	1043.08
Aldh1a3	75.8866	-1.64666	0.593677	-2.77367	0.00554284	0.0438168	59.3945	48.4835	101.159	51.2844	34.5691	47.4793	97.0571	63.5417	36.2257	33.9767	44.4968	103.948	129.271	237.121	50.2915
Esyt1	2457.08	-1.27564	0.459921	-2.7736	0.00554395	0.0438168	1349.68	2712.56	1130.64	1235.71	3310.63	1102.42	1296.92	2198.94	2932.6	2053.85	1425.96	2429.8	3557.16	5962.18	4157.14
Lrrc75a	189.917	-1.20344	0.433988	-2.77298	0.00555462	0.0438769	147.609	154.083	129.292	91.5608	163.053	78.6155	172.651	181.652	415.064	135.273	140.319	271.428	187.208	231.768	349.184
Mme	706.005	-2.85025	1.02819	-2.77211	0.0055694	0.0439671	320.019	509.816	138.495	327.567	194.874	181.636	132.509	2162.32	148.645	696.521	212.18	488.325	2614.18	2182.12	280.868
Ston2	116.644	1.87498	0.676414	2.77195	0.00557221	0.0439671	74.6536	290.558	31.7633	102.872	302.677	184.012	79.5972	27.1982	37.1647	209.329	125.542	123.127	55.5657	38.5678	67.0377
Psmd2	20954.5	0.411767	0.148692	2.76926	0.00561842	0.0443072	22433.3	24038.6	19511.8	23882	22609.7	21524.6	24757	19413	20552.1	17830.4	24314.8	22321.6	17505.9	17480.3	16141.9
Ccdc6	2515.78	-0.456343	0.164826	-2.76864	0.00562903	0.0443663	2561.61	2473.3	2060.09	2559.17	2323.14	1876.35	1992.82	2230.58	2572.5	2887.55	2267.55	2658.33	3231.39	2886.3	3155.99
Rab20	286.888	0.667463	0.241168	2.76763	0.00564655	0.0444799	322.373	345.388	358.885	289.65	203.342	364.828	378.312	277.826	247.13	294.382	351.936	329.617	198.284	181.977	159.389
D2Wsu81e	1263.09	0.591472	0.213733	2.76734	0.00565152	0.0444944	1218.71	1279.15	1580.78	1361.65	1189.49	1796.64	1587.45	1241.38	1081.71	1089.55	1432.16	1201.95	829.742	1037.94	1018.01
0610011F06Rik	526.72	0.62537	0.226027	2.76679	0.00566112	0.0444963	679.866	475.205	696.495	657.659	548.451	561.437	632.916	468.223	397.833	432.544	584.287	619.918	380.184	369.867	395.911
Sult4a1	23.8584	2.82297	1.02026	2.7669	0.00565914	0.0444963	19.3832	12.6361	6.99777	14.1063	17.8041	162.586	21.9463	7.2029	36.6118	0.974776	19.1791	10.954	6.97482	11.8447	8.67425
Tcf7	153.346	1.56641	0.566093	2.76705	0.00565659	0.0444963	231.412	133.622	186.416	315.592	125.276	254.96	115.235	107.494	62.0384	217.53	201.412	114.036	111.504	107.116	16.5395
Runx3	451.775	-2.45395	0.887099	-2.76626	0.00567026	0.0445436	53.7041	223.676	330.29	221.07	21.1741	417.838	285.507	295.158	29.5114	639.152	128.815	513.945	1500.22	1318.43	798.129
Atraid	380.015	-1.08378	0.391935	-2.7652	0.00568884	0.0446158	137.723	293.79	375.88	348.896	312.978	134.828	287.392	503.174	388.085	433.775	416.186	378.412	591.864	629.922	467.325
Atxn7l2	480.891	0.558115	0.201813	2.76551	0.00568343	0.0446158	581.805	485.121	422.554	602.516	489.13	642.994	509.741	511.362	387.243	387.85	567.854	447.122	389.993	394.712	393.369
Lypd1	29.7939	-3.48924	1.26184	-2.7652	0.00568879	0.0446158	7.7178	2.17262	9.6254	1.94032	5.80014	4.09092	10.0623	162.973	3.77695	9.3856	88.6168	6.84928	65.6786	60.7397	7.47866
Gpc6	749.837	-1.29449	0.468328	-2.76406	0.00570873	0.0447354	298.324	848.464	350.029	473.592	686.697	450.424	438.677	621.932	1598.74	556.915	461.107	511.306	960.469	1388.59	1602.29
Rbpms2	2094.41	1.03202	0.373383	2.76396	0.00571037	0.0447354	2629.43	1947.16	3668.62	2818.9	2419.49	2638.41	2906.05	844.808	1970.33	1922.88	1748.24	2049.72	1069.8	1049.95	1732.39
Mettl1	849.972	-0.618839	0.223959	-2.76317	0.00572421	0.0448192	749.243	845.805	960.171	687.656	711.934	741.081	941.527	872.009	749.683	706.064	533.297	963.865	1262.01	1149.86	875.365
Fbxl21	18.1912	1.62754	0.589065	2.76292	0.00572862	0.0448291	33.4703	11.215	12.266	27.8269	23.8121	27.9931	10.9435	15.0869	22.7536	17.3106	30.3066	14.2191	7.22009	7.78527	10.6597
Raf1	2862.24	-0.508684	0.184171	-2.76202	0.00574444	0.0449283	2266.23	2839.85	1816.88	2285.1	2910.05	2525.52	2624.99	3145.33	3654.11	2745.53	2533.51	2601.28	3522.88	3524.55	3937.75
Wfdc2	79.5283	5.38068	1.94845	2.76152	0.00575322	0.0449722	119.774	80.0207	18.8583	261.251	13.2877	7.19298	49.0796	141.927	0	19.2947	6.14056	469.001	1.67956	5.41783	0
Surf2	1149.75	0.596319	0.215983	2.76095	0.00576328	0.0450262	1155.8	1201.93	1545.52	1294.42	1022.48	1719.95	1277.43	977.143	937.482	1046.67	1175.86	1221.57	833.977	834.151	1001.8
Plcxd2	331.144	-1.39308	0.504611	-2.7607	0.00576783	0.045037	141.803	279.048	349.888	236.046	146.181	125.905	337.555	206.826	769.763	356.768	167.817	514.839	455.356	466.25	413.111
Mlh1	687.383	0.371834	0.134798	2.75845	0.00580767	0.0453233	833.897	695.764	708.652	773.334	693.64	730.474	880.901	691.963	753.095	603.452	638.578	609.132	587.522	515.35	594.991
Dusp6	2566.09	1.27663	0.462857	2.75816	0.00581275	0.045332	3192.11	4553.23	3057.02	2460.14	3910.35	2960.26	1998.16	1960.22	3777.42	1578.16	2475.06	2717.6	497.205	973.418	2381.08
Zbtb25	466.765	0.462038	0.167525	2.75803	0.00581514	0.045332	532.889	525.383	488.762	520.372	524.401	495.901	615.1	437.192	438.233	435.722	416.45	452.452	431.304	354.66	332.656
Mylip	257.066	-1.07291	0.389071	-2.75763	0.00582229	0.0453629	157.106	171.641	92.9703	189.965	208.964	239.914	164.075	439.377	197.704	259.29	207.134	184.227	534.072	525.473	284.082
Traf1	88.01	2.52059	0.914337	2.75674	0.00583806	0.045461	163.669	59.071	70.9202	183.385	29.9103	181.585	247.439	34.4391	28.489	32.4498	167.442	52.5369	6.80757	30.8995	31.1074
Cyp27a1	14.7223	3.02731	1.09858	2.75566	0.00585732	0.0455861	22.0372	19.5697	21.5946	9.80011	42.1673	11.3662	10.2614	31.8178	7.9474	16.6498	13.1822	4.05437	9.65634	0.730671	0
Arsi	88.8125	-3.05072	1.10716	-2.75545	0.00586114	0.0455909	10.2017	5.26506	15.9949	6.58295	18.7412	25.7759	17.766	696.624	42.1036	31.1928	24.9328	13.9415	322.835	87.22	13.0114
Gsto1	10856.7	1.20701	0.438076	2.75525	0.00586478	0.0455944	13020.2	15606.8	18474.8	14381.4	13256.5	12267.9	9685.72	5512.79	16138.5	4908.9	10788.8	11522.6	3215.22	4602.22	9468.68
1700012B09Rik	22.0189	4.55465	1.6536	2.75438	0.0058803	0.0456053	43.0403	8.26529	9.80836	10.1496	82.825	8.75423	0	12.4635	8.9804	0	106.828	34.8213	0	3.16947	1.17696
Cmpk1	1609.72	-0.572442	0.207811	-2.75463	0.00587578	0.0456053	1310.92	1680.64	1359.65	1425.5	1406.3	1150.2	1788.21	1477.52	1839.89	1724.75	1443.87	1616.6	2373.06	2151.85	1396.85
Evi2a	173.761	1.65653	0.601385	2.75452	0.00587791	0.0456053	159.468	223.234	433.709	357.897	347.666	119.301	91.7008	94.0631	23.4751	248.134	126.277	119.861	62.8837	56.425	142.325
Prkrir	3652.73	-0.542395	0.196928	-2.75428	0.00588218	0.0456053	3355.92	2992.81	3600.43	3358.9	3029.72	3210.36	3190.75	4279.28	3125.29	3627.59	3170.92	3869.8	5142.12	5438.86	3398.28
Rufy1	1118.3	0.875727	0.317904	2.75469	0.0058748	0.0456053	1684.84	1231.88	2159.01	855.993	1398.12	1237.04	1201.21	902.615	1075.99	707.742	1119.64	1297.46	507.548	502.446	892.971
Gm7334	749.257	0.719532	0.261465	2.75192	0.00592463	0.0459094	631.484	936.128	637.796	1219.73	689.675	954.7	752.444	582.406	863.123	651.15	678.939	902.214	671.576	542.702	524.792
Relt	283.758	-0.860059	0.312574	-2.75154	0.00593166	0.0459389	268.292	179.91	223.529	292.189	158.368	189.6	293.601	279.346	416.724	256.403	250.819	285.493	244.346	487.353	430.395
Ccdc28b	61.184	-0.890196	0.323774	-2.74944	0.00596976	0.0462089	66.5303	69.2093	70.2372	57.7452	44.7607	35.2214	53.4165	53.3099	60.1065	51.8673	42.6061	58.0189	110.146	90.9317	53.6529
Lrrc4c	67.6909	-1.52896	0.556197	-2.74896	0.00597843	0.0462509	19.7351	65.8896	32.6361	27.0032	31.8566	36.8603	46.4378	44.3194	96.2838	188.365	86.9624	60.5049	105.562	61.8377	111.11
Dnajc21	1170.87	0.493673	0.179597	2.74878	0.00598184	0.0462522	1381.37	1065.02	1588.55	1247.27	1570.15	1214.8	984.289	811.619	973.604	1383.8	1338.35	1140.07	940.361	898.746	1025.05
Bbs12	338.97	0.886507	0.322579	2.74819	0.00599261	0.0462977	454.912	311.584	338.858	565.322	401.954	337.675	379.796	242.156	308.096	376.514	334.57	326.874	170.186	175.614	360.441
Yipf5	2307.01	-0.494932	0.1801	-2.7481	0.00599422	0.0462977	1967.9	1977.56	2721.13	1824.42	2075.58	1628.84	2532.18	2530.28	2378.85	2897.03	2264.09	2015.54	2755.06	2627.37	2409.27
Pqlc2	258.849	-0.472062	0.171813	-2.74754	0.0060044	0.0463512	234.22	242.409	291.593	221.531	201.576	187.665	254.283	258.961	258.775	296.469	247.542	340.549	309.264	259.535	278.37
Aprt	5094.94	0.681154	0.247974	2.74688	0.00601657	0.04642	5602.76	6675.05	7124.72	6297.06	4970.16	6203.07	5841.89	5046.15	3885.43	3149.5	5585.9	5146.4	2884.59	3635.24	4376.16
Mmp2	5198.33	-1.82792	0.66563	-2.74615	0.00602984	0.0464722	2903.4	1890.16	2319.26	916.911	4285.17	3926.86	3338.97	12594.8	4706.45	772.997	3516.48	4393.56	12030.6	16007.6	4371.82
Ophn1	383.032	-1.05662	0.38474	-2.74633	0.00602662	0.0464722	351.905	500.598	692.18	236.767	196.828	265.582	191.971	283.869	363.047	246.906	383.558	578.4	586.452	574.543	292.879
Bcl2l1	2966.93	0.731189	0.266315	2.74558	0.0060404	0.0464755	3081.53	3028.11	3569.42	3358.05	2909.94	3501.03	4578.07	1851.54	3376.04	2603.76	3550.96	3210.58	1922.55	2096.81	1865.6
Dchs1	3089.56	1.06847	0.389182	2.74542	0.00604331	0.0464755	2486.7	3491.84	1973.62	3660.78	6922.5	3517.54	2843.77	3351.48	5396.62	2138.81	2470.77	1365.48	3043.01	1302.39	2378.01
Igsf10	1753.28	-1.50164	0.546922	-2.74562	0.00603967	0.0464755	977.262	3264.12	1757.75	609.153	1676.18	858.658	1087.33	1705.57	2543.96	812.665	1077.26	1026.64	4832.79	3068.82	1001.04
Tm4sf4	39.4977	1.95111	0.710554	2.7459	0.00603451	0.0464755	26.5244	62.1277	84.9729	43.2594	71.2164	54.5259	41.8024	8.23189	65.9012	24.3694	26.8507	38.837	5.97842	11.8447	26.0228
Slc19a2	550.197	0.616771	0.224702	2.74483	0.00605414	0.0465336	675.87	657.449	762.173	822.457	487.791	640.168	557.886	500.551	564.293	429.736	419.773	463.548	541.278	323.649	406.325
Ncoa1	332.204	-0.900719	0.328194	-2.74447	0.00606087	0.0465603	255.042	330.646	169.946	251.093	390.753	260.733	209.012	214.029	334.083	372.364	196.585	313.684	669.583	535.164	480.337
Ehbp1	747.908	-0.890755	0.324722	-2.74313	0.00608571	0.0467008	587.027	705.555	407.65	670.516	697.781	547.3	336.897	697.728	864.757	750.064	790.238	611.403	1075.51	967.506	1508.69
Pdlim5	5736.3	-0.979231	0.356956	-2.74328	0.00608283	0.0467008	4166.27	4679.36	5069.59	3013.03	5815.19	3337.81	6407.94	4569.2	6112.62	6293.96	6135.77	6459.46	8836.26	11552.7	3595.39
Sumo1	4319.98	0.392954	0.143264	2.74286	0.00609073	0.0467142	4889.71	4254.46	5404.45	4364.78	3995.7	5167.91	4968.75	4536.64	4274.51	4171.06	4399.44	4068.74	3131.39	3307.33	3864.82
Cdc123	3375.3	0.431812	0.157496	2.74173	0.00611166	0.0468495	3270.3	3549.53	3713.56	3306.41	3532.47	4499.06	3626.12	3741.06	3180.6	2974.56	3514.8	3314.67	2447.75	2728.72	3229.82
Nptn	7872.71	-0.4429	0.161556	-2.74146	0.00611666	0.0468626	6224.02	6950.06	8671.19	6004.98	8066.47	6345.87	8383.34	8036.62	8501.52	8396.51	7725.08	7030.08	9857.42	8328.35	9569.11
Fcf1	1863.16	0.733896	0.267778	2.74069	0.00613103	0.0469475	2598.76	1858.05	3056.66	1892	1642.12	2466.91	2432.45	1542.13	1408.38	1467.12	1799.51	2174.94	1058.1	1285.37	1264.87
Etl4	116.403	-1.73281	0.63243	-2.73992	0.00614537	0.047017	114.01	33.2235	59.6705	44.4728	122.012	85.8049	40.7166	149.77	62.9051	47.5067	36.6104	114.169	222.799	444.431	167.939
Mtfr1l	1905.78	-0.375762	0.137152	-2.73974	0.00614875	0.047017	1770.78	1725.72	2281.38	1642.24	1618.63	1743.65	2002.87	1699.1	1923.13	1957.35	1907.72	1821.15	2373.21	2159.68	1960.01
Vps72	1646.59	0.45167	0.164862	2.73967	0.00615	0.047017	1772.53	1665.21	1937.15	1839.32	1747.18	2005.97	2083.94	1410.64	1692.55	1265.55	1646.52	1542.89	1274.68	1444.96	1369.73
Wnt4	34.502	-2.15561	0.7869	-2.73937	0.00615569	0.0470353	15.3025	16.8482	16.9946	6.58295	9.37059	20.819	49.1179	65.8551	28.3741	15.5964	40.276	68.7117	7.97123	61.377	94.3325
Irf5	40.4626	-1.92822	0.704001	-2.73894	0.00616373	0.0470463	39.9039	36.2794	34.7578	6.69402	23.9539	12.926	23.6182	45.3116	72.3256	22.3328	80.0203	42.9384	14.7237	84.2374	66.9163
Oas1c	59.2796	-1.4584	0.532448	-2.73906	0.00616159	0.0470463	59.1944	69.9696	36.0779	16.9696	42.6614	21.0061	80.1998	129.974	64.2451	65.6833	18.8466	62.4415	65.2756	91.7043	64.9441
Dnajc25	629.281	-0.690412	0.252134	-2.73828	0.00617619	0.0471161	540.818	520.752	497.008	664.78	385.766	505.748	529.367	744.952	657.86	792.321	576.107	515.677	1020.64	823.683	663.738
2700097O09Rik	229.129	0.596766	0.217981	2.73769	0.00618716	0.0471746	253.044	207.91	310.977	254.081	223.758	287.948	272.074	198.106	177.567	266.109	252.658	226.683	167.462	165.157	173.407
Pdgfd	659.928	-1.48145	0.541371	-2.73649	0.0062099	0.0473227	262.737	591.528	331.798	551.273	371.92	295.214	754.362	589.677	745.476	1295.07	171.315	536.413	1028.46	1552.17	821.51
Cdc5l	3562.9	0.282465	0.103245	2.73588	0.00622137	0.0473848	3764.42	3146.4	3505.88	4058.86	3816.64	3875.31	3238.64	3233.07	3243.8	3665.16	4234.74	3999.22	3267.21	2948.25	3445.85
Gm13882	51.439	0.804388	0.294093	2.73515	0.00623527	0.04744	53.0487	53.7036	57.9815	48.9019	50.6012	73.3622	59.5685	56.5942	66.8165	42.8901	59.4551	49.7911	31.8849	34.4573	32.5284
Pcdhb18	78.0432	-1.52019	0.555779	-2.73523	0.00623359	0.04744	36.726	49.4916	74.9761	16.9276	80.587	76.3363	60.6135	93.6377	97.0212	24.3694	32.6044	28.8788	169.389	76.4521	252.638
Sstr4	9.79745	2.90308	1.06156	2.73473	0.00624309	0.0474741	19.3832	14.7422	4.9984	45.1402	7.49647	17.8449	4.18024	1.02899	10.0682	5.84865	3.83581	2.98746	3.98561	0	5.42141
Impdh1	1724.97	0.556391	0.203497	2.73415	0.00625415	0.0475328	1986.26	1930.11	1943.43	1875.09	1964.49	2121.57	1980.05	1278.07	1603.6	1227.73	2055.81	1854.93	1384.94	1305.12	1363.42
Ormdl1	539.903	0.593216	0.217076	2.73276	0.00628054	0.047708	586.072	500.604	718.378	613.28	506.592	643.536	646.394	466.094	645.218	608.93	496.198	498.492	403.049	309.923	455.783
Lpcat4	1051.11	0.769391	0.281568	2.73253	0.00628508	0.0477171	1240.44	832.016	1495.05	1615.78	922.343	1555.02	1208.29	850.312	825.35	759.543	990.85	1071.01	906.442	795.466	698.801
Dnmt3a	882.782	0.836447	0.306182	2.73186	0.00629784	0.0477885	951.905	835.68	1425.47	1063.3	708.321	1018.03	1571.25	813.191	1625.72	487.915	619.793	559.391	630.877	530.089	400.79
Rad51ap1	1024.03	-0.46777	0.171336	-2.73013	0.00633098	0.0480144	899.2	1107.26	1149.9	655.628	810.475	933.59	1165.02	1014.76	1170.88	1066.07	962.234	1107.01	1022.65	1021.52	1274.32
Rab31	3565.19	0.396262	0.145158	2.72987	0.00633589	0.0480261	3055.4	3400.18	3120	4975.77	4535.36	3824.75	3870.91	3091.07	3134.88	3293.77	3866.5	3175.67	3146.64	3598.63	3388.38
Rgs12	793.42	-0.711235	0.260568	-2.72956	0.00634195	0.0480465	653.289	738.283	687.427	620.547	819.858	552.323	624.258	741.697	989.573	650.306	756.64	800.936	838.59	906.994	1520.58
Trmt10c	1330.11	0.746514	0.273517	2.72932	0.00634657	0.048056	1564.94	1337.33	1936.38	1776.46	1480.55	1491.04	1336.63	728.522	1375.69	1024.49	1386.65	1682.94	932.634	781.749	1115.73
Adcy1	70.5779	-2.09043	0.766029	-2.72891	0.00635433	0.0480892	82.6402	24.4713	13.0763	43.0544	35.2396	32.4195	22.2137	104.313	41.4874	11.1568	105.053	71.6425	114.956	169.02	187.925
Scap	2913.84	0.582347	0.213426	2.72857	0.00636095	0.0481138	2603.47	3000.03	3102.01	2665.16	4908.31	2913.67	3384.95	3212.49	3146.78	2720.6	2800.14	2245.58	2251.87	2476.62	2275.91
Pcdhgb1	79.4776	-3.06533	1.12386	-2.72751	0.00638138	0.0482427	142.169	160.05	9.89445	20.2671	6.64538	7.03062	40.3523	186.646	17.448	32.765	266.398	16.4782	20.021	140.203	125.795
Ckap2l	2885.55	-0.457872	0.168032	-2.72491	0.00643186	0.0485986	2169.9	2560.93	1995.36	2366.1	3163.51	2706.47	2030.55	2548.8	2470.38	3773.36	3253.73	2931.7	3741.5	4134.87	3436.09
Fcgrt	301.728	-1.66562	0.611421	-2.72418	0.00644611	0.0486804	187.711	145.316	137.956	92.1613	204.279	225.043	341.735	575.203	189.466	233.946	382.622	156.344	714.421	831.282	108.428
Clstn1	2431.21	-1.27797	0.469361	-2.72278	0.00647344	0.0488587	1854.31	1720.19	1460.09	2313.05	1254.47	1805.06	1857.4	3198.82	835.052	2931.45	2359.14	1850.82	5740.2	5538.2	1749.86
Frmd8	2019.61	0.371846	0.136576	2.72262	0.00647657	0.0488587	2228.8	2252.41	1756.04	2462.63	2231.73	2260.13	1726.33	1888.6	1936.5	2265.25	1922.17	1988.58	1781.35	1617.15	1976.55
Wdr61	2072.05	0.48638	0.178657	2.72243	0.00648038	0.0488616	2201.57	2018.3	2592.52	2351.22	2158.52	2013.62	2816.4	2271.11	1862.53	2111.84	2111.23	1914.97	1365.87	1489.32	1801.75
Ly6g	13.9648	3.19867	1.17528	2.72163	0.0064961	0.0489542	32.1734	14.2325	31.5272	12.7107	14.8103	7.42209	21.7333	19.687	12.9435	2.43259	4.78621	31.4055	0	0	3.60782
Adh5	3385.14	0.637812	0.234436	2.72062	0.0065159	0.0490775	4318.6	3854.29	4574.26	3699.13	2931.06	4319.75	4177.7	3143.2	2857.5	2343.78	4001.29	3518.96	1985.84	2447.84	2603.93
Dot1l	2860.64	-0.628179	0.23097	-2.71974	0.00653326	0.0491787	2176.75	2915.52	2212.82	3443.16	2414	1890.68	2313.52	2622.25	2768.37	3181.02	2113.07	2882.41	3925.28	4121.35	3929.44
Klra6	27.8451	1.76105	0.647542	2.71959	0.00653624	0.0491787	40.8067	12.6361	36.9882	24.451	26.2376	35.6897	30.3068	20.5797	15.56	77.0073	23.0149	48.7952	3.98561	9.69111	11.9271
Pigt	2703.2	0.509515	0.187368	2.71933	0.00654144	0.0491919	3208.53	2980.83	2876.88	2764.95	2561.36	3577.11	3229.7	2604.07	2549.21	2640.96	2645.21	2656.04	2527.95	2108.42	1616.78
Gclc	1213.9	0.340303	0.125154	2.71906	0.00654673	0.0492057	1114.02	1242.55	1054.66	1415.33	1360.61	1456.34	1212.27	1033.1	1149.61	1217.49	1450.9	1159.14	1175.76	1045.56	1121.15
Akr1b3	8395.18	1.20604	0.443622	2.71861	0.00655562	0.0492466	11014.5	5957.05	14551.4	13011.6	6292.85	10009.7	15968.7	5339.47	5849.82	5956.06	10028.5	9241.45	3238.11	4207.4	5261.08
Gda	190.786	1.99555	0.734095	2.71838	0.00656023	0.0492553	226.881	86.0849	185.27	212.226	127.319	228.317	186.613	600.661	60.8026	354.314	192.829	257.454	96.4982	33.4573	13.0617
Ddx18	5319.12	0.655731	0.241267	2.71787	0.00657043	0.0493059	6557.08	4912.47	7195.19	6822.29	3913.85	7207.61	5783.31	5274.12	4983.54	4962.46	5340.79	5444.44	3504.64	3195.9	4689.15
Asl	736.584	0.543604	0.200044	2.71742	0.00657921	0.0493458	943.451	651.029	1042.6	774.31	736.13	757.791	1067.04	740.62	766.297	610.826	712.088	690.354	509.74	541.911	504.575
Slc7a1	3144.66	-0.737716	0.271563	-2.71656	0.00659648	0.0494493	2258.68	2597.44	1355.62	3587.57	2794.32	2200.86	2583.93	3371.04	3443.17	3162.17	2510.22	2992.84	5765.23	4863.45	3683.29
Pcdhb4	7.87467	-2.48046	0.913226	-2.71615	0.00660458	0.049484	4.08067	2.10602	13.9955	3.76169	3.74823	0.991381	8.36049	9.26088	5.49177	4.87388	6.71267	6.97075	10.9604	8.61432	28.1913
Cdkn3	136.484	-0.794202	0.292563	-2.71463	0.00663496	0.0496594	145.884	126.361	123.96	107.208	110.573	102.112	138.993	152.29	97.0212	121.847	140.966	125.473	209.245	236.894	108.428
Tnnt2	33.3929	-3.3672	1.24035	-2.71471	0.0066334	0.0496594	3.97773	29.9043	15.9182	12.0092	13.3681	3.80331	8.81042	12.1013	59.7796	3.50388	9.23335	27.5465	1.9378	26.1453	272.854
Nt5dc2	2236.22	0.739832	0.272607	2.71392	0.00664927	0.0497405	2711.61	1900.69	2623.16	2398.08	2067.15	2336.68	2664.91	2869.84	3068.07	1789.69	3024.54	2015.54	1142.87	987.416	1943.03
Ccdc109b	900.346	0.63122	0.232621	2.71351	0.00665751	0.049776	1072.91	1074.07	766.018	913.184	1084.75	1106.44	757.097	520.377	637.799	968.156	1277.48	1322.49	521.387	640.589	842.442
Kctd3	1350.01	-0.506895	0.186845	-2.71292	0.00666927	0.0498377	1061.42	1154.44	981.916	1458.32	1042.7	1214.19	1473.53	1613.66	1496.93	1380.69	1048.94	1043.84	2149.24	1574.75	1555.58
H60b	14.8087	4.93523	1.81964	2.7122	0.00668386	0.0499206	17.8751	28.2172	14.56	28.307	4.82885	1.02176	29.0812	0	92.4472	1.00464	2.79336	1.02633	0.967485	0	0
Athl1	426.917	-0.775965	0.28613	-2.71193	0.00668924	0.0499347	371.971	356.635	355.195	336.043	408.686	286.355	446.087	549.866	300.133	500.476	378.906	349.172	760.417	610.118	393.698
Rabgef1	919.28	-0.462997	0.170828	-2.71032	0.00672187	0.0501257	889.24	769.521	1074.66	738.935	774.508	655.607	1050.71	1016.97	863.433	1061.94	909.721	994.333	958.448	1164.09	867.087
Smg8	1183.46	0.407261	0.150259	2.71039	0.0067204	0.0501257	1272.84	1204.47	1094.8	1454.15	1192.66	1259.86	1281.2	1249.36	1378.64	1032.14	1263.82	1121.54	894.618	885.623	1166.1
G6pdx	3692.71	0.605538	0.223481	2.70957	0.00673707	0.0501652	4332.37	3821.83	2795.51	5244.98	3840.44	4419.5	3704.02	3803.74	2595.04	4160.39	4574.07	3223.09	2919.28	3275.05	2681.36
Murc	130.46	-2.61017	0.963405	-2.70932	0.0067422	0.0501652	188.731	20.0072	114.963	78.055	14.0559	72.3708	62.7037	107.015	13.7294	136.469	67.1267	77.674	623.749	358.571	21.6856
Ncln	4177.26	-0.347197	0.128145	-2.70942	0.00674012	0.0501652	4482.9	4459.65	4302.15	3980.82	3958.33	3332.12	4152.99	4114.49	3280.99	4152.25	3979.06	4124.2	4292.07	5218.28	4828.61
Rab8b	2075.31	-0.912322	0.336679	-2.70977	0.00673296	0.0501652	1450.68	2001.78	2123.32	1399.35	1269.71	1446.42	1976.21	2136.18	1859.88	3678.8	1269.65	2772.37	3040.03	3023.63	1681.72
Sdha	8574.19	0.429096	0.158385	2.70919	0.00674475	0.0501652	8567.54	10205.1	10309.6	9991.17	7253.83	9428.05	10699.3	8514.5	8134.74	9058.36	8753.02	7888.27	6437.11	6870.73	6501.45
Cd93	44.5709	1.90608	0.703838	2.70813	0.00676642	0.0503001	73.4521	42.1205	27.9911	130.719	28.1118	57.5001	59.5685	38.0725	14.6447	31.1928	79.5931	27.883	20.9245	10.7679	26.0228
Tango6	905.87	0.436613	0.161258	2.70755	0.00677816	0.0503611	773.287	949.817	655.791	1065.5	1060.75	1054.83	1011.62	1133.94	1009.57	769.098	916.759	836.49	758.263	691.299	901.038
Ddx56	2347.99	0.530503	0.196007	2.70655	0.00679864	0.0503907	2898.58	2414	2900.69	2840.39	1923.82	2744.08	2578.35	2527.48	2117.92	1932.07	2863.21	2281.07	1585.47	1866.19	1746.52
Map1s	2502	0.603238	0.222888	2.70646	0.00680056	0.0503907	2586.13	2496.69	2569.18	2564.53	4243	2403.11	2536.36	2540.57	2337.66	1972.95	2744.52	2471.63	1733.74	1962.99	2366.99
Nup62cl	231.486	3.79546	1.40222	2.70674	0.00679465	0.0503907	520.43	521.233	477.255	244.586	62.6621	74.8566	105.213	29.4464	128.782	12.8428	965.44	300.767	0.772222	28.004	0
Pafah2	717.101	-0.646714	0.238964	-2.70632	0.00680335	0.0503907	690.572	678.398	579.979	618.314	641.164	509.184	700.219	942.974	663.963	798.738	568.024	595.391	1125.76	997.683	646.15
Tert	100.263	1.23968	0.457949	2.70702	0.00678908	0.0503907	87.7344	82.135	34.9888	196.548	235.202	147.716	84.6499	77.174	82.3765	62.3856	75.7573	91.6155	50.8166	47.3787	147.462
Zfp316	269.415	-0.948623	0.350506	-2.70644	0.00680086	0.0503907	160.87	221.827	125.93	240.503	240.02	156.331	168.584	390.335	305.254	350.3	212.052	240.983	476.531	438.105	313.595
Nedd9	1342.54	-1.04054	0.384514	-2.70612	0.00680739	0.0503945	641.76	1162.66	373.924	1046.81	1269.07	1151.13	750.441	1140.25	1778.81	1147.6	1547.93	995.937	1902.36	2741.83	2487.63
Ssrp1	19111.3	0.421875	0.155956	2.70509	0.00682849	0.0505244	20873	19087.7	24270.9	19757.5	19513.9	23846.4	18629.8	17309.4	18284.8	16276.1	21499.9	20204.8	14233.8	14953.5	17927.6
Tdg	3276.79	-0.482244	0.178288	-2.70487	0.0068332	0.050533	2810.8	3191.88	2662.34	3605.72	3014.48	2217.75	3141.08	3637.7	3184.09	3350.85	2681.27	3307.62	4146.52	4181.74	4017.99
Adss	4894.7	0.401078	0.148313	2.70426	0.00684576	0.0505997	5396.55	4648.05	5780.34	5720.72	4877.43	5632.66	5189.04	5189.27	4276.35	4742.95	5060.63	4615.05	4163.12	3467.37	4660.92
Fbxo22	1319.91	0.330415	0.122236	2.7031	0.00686964	0.0506711	1335.28	1311.52	1573.64	1359.36	1341.93	1433.05	1575.66	1301.9	1248.13	1367.63	1349.8	1312.56	1058.31	1071.52	1158.41
Ifi204	806.535	-1.37919	0.510205	-2.7032	0.00686744	0.0506711	824.633	1367.57	1069.72	146.55	363.175	360.473	604.426	922.381	824.546	1916.18	473.477	961.633	1273.8	543.671	445.78
Plin4	106.357	-2.72324	1.00739	-2.70326	0.0068664	0.0506711	34.6858	21.0602	30.9901	76.1742	51.5382	18.8362	19.8561	196.536	5.49177	47.764	51.7834	72.695	537.061	407.027	23.8542
Zdhhc9	1131.95	-0.457256	0.169153	-2.70321	0.00686724	0.0506711	1012.05	1282.98	1071.18	982.173	1097.86	838.198	1003.52	1249.54	987.217	1165.05	1135.38	1147.11	1360.53	1521.76	1124.71
Zfp354c	597.102	-0.926654	0.342967	-2.70187	0.00689502	0.050832	371.414	435.443	426.032	546.095	561.384	517.793	344.618	598.369	706.263	477.977	469.621	411.283	1592.45	958.67	539.112
Crlf2	110.012	-1.43405	0.530916	-2.70109	0.00691136	0.0509262	105.077	78.9759	115.963	115.672	58.0976	55.5173	132.723	61.7392	84.2071	20.4703	79.5931	122.486	240.133	152.904	226.615
Fstl4	22.6031	3.00134	1.11142	2.70046	0.0069243	0.050959	40.8067	55.8097	17.9943	24.451	41.2306	49.569	38.6673	2.05797	3.66118	4.87388	30.6865	14.9373	9.96404	0	4.33713
Rbak	234.033	-0.811662	0.300554	-2.70055	0.00692241	0.050959	175.692	184.298	193.957	181.827	200.183	200.059	143.912	368.65	203.154	240.626	192.928	203.581	320.275	412.381	288.971
Smarcc2	3238.38	-0.674888	0.249926	-2.70036	0.00692653	0.050959	2994.71	2957.62	2044.68	2758.99	3197.54	2774.4	2288.73	3687.94	2937.15	3886.33	2411.17	2697.51	4542.97	5595.19	3800.73
Chrnb1	274.981	1.17531	0.435532	2.69857	0.0069639	0.0512075	351.737	268.196	364.664	461.58	347.47	274.83	511.408	128.44	242.992	185.348	259.928	248.056	158.591	102.893	218.586
Qtrt1	899.7	0.674893	0.250195	2.69747	0.00698694	0.0513504	1052.81	960.347	1443.54	1041.99	875.213	1008.23	1223.77	755.276	842.071	617.033	867.852	974.909	597.842	521.166	713.457
Ttn	27.7429	1.01273	0.375605	2.69628	0.00701191	0.0515074	28.8866	28.8227	21.7016	47.9314	36.8416	35.5572	25.6459	15.5394	23.3253	27.6013	27.8614	36.5835	15.9878	21.3429	22.5148
Abcc1	6411.48	0.696583	0.258385	2.69591	0.00701962	0.0515375	6938.6	9014.4	4476.68	7915.09	7929.23	7283.86	5840.42	4955.19	8474.28	5356.44	6619.39	7097.55	4407.14	4608.48	5255.4
Cd248	1977.66	-1.64165	0.609064	-2.69537	0.0070311	0.0515383	1458.84	1506.86	627.8	863.307	1232.23	1275.91	1209.14	5510.22	753.288	2049.95	1423.09	1234.82	4568.51	4451.45	1499.56
Cdkn2aipnl	1720.04	0.583664	0.21655	2.69528	0.00703286	0.0515383	2239.37	1826.78	2343.85	1680.43	1580.21	2030.55	2017.61	1524.62	1897.37	1339.17	2190.98	1599.15	1094.68	1041.55	1394.34
Ext2	4425.93	-0.757936	0.281215	-2.69522	0.00703419	0.0515383	3369.19	4579.96	3857.99	2922.61	3704.82	4190.63	3413.5	5985.3	3505.71	4273.7	3958.66	4333.31	6598.91	7754.93	3939.79
Slc25a16	487.229	-0.773077	0.286826	-2.69528	0.00703291	0.0515383	356.699	456.513	319.183	447.596	488.402	294.983	339.769	573.632	519.884	613.174	346.343	448.395	809.394	656.832	637.637
Il3ra	114.535	1.23961	0.459998	2.69482	0.00704262	0.0515735	186.691	140.051	86.9722	102.506	114.321	130.862	224.688	105.986	171.16	55.5622	119.869	132.444	76.7231	40.918	29.2756
Ssh1	915.223	-0.460406	0.170877	-2.69437	0.00705209	0.0516163	711.407	914.395	771.121	788.382	863.885	760.761	916.822	920.986	1120.37	1013.93	734.534	891.237	1242.71	1105.72	972.092
F11r	486.757	1.54075	0.571912	2.69403	0.00705934	0.0516215	773.363	550.62	242.924	944.867	588.032	924.095	439.743	406.849	99.595	431.219	723.368	332.333	437.319	285.1	121.929
Pctp	78.4527	1.49811	0.556091	2.694	0.00706004	0.0516215	214.235	73.7109	70.9773	144.825	62.7829	52.5432	72.1092	82.3189	112.581	63.3604	86.3058	48.7952	19.9281	47.3787	24.9385
Birc2	788.65	-0.549651	0.204209	-2.69161	0.00711071	0.0519654	681.765	638.437	566.864	639.394	868.557	611.59	603.495	926.574	795.033	949.69	745.985	700.502	999.245	1068.74	1033.88
Cyfip2	33.7097	1.77625	0.660071	2.691	0.00712377	0.0520075	36.5707	21.4845	22.2506	68.0277	86.903	45.9705	19.3838	13.4952	44.1401	21.307	46.2455	21.767	5.54441	14.3439	38.2115
Oxsr1	3522.02	0.504073	0.187307	2.69116	0.00712046	0.0520075	3411.47	3759.42	3411.69	4441.78	3704.53	3727.99	4718.82	2811.74	3356.57	3881.51	3424.68	3807.45	2997.92	2436.48	2938.22
Frmd5	88.8374	-2.7677	1.02864	-2.69063	0.00713168	0.0520387	52.5048	23.6462	22.9514	38.683	15.1776	29.0024	30.6981	120.026	34.3532	317.12	29.2487	56.2415	324.721	233.956	4.2302
Dsel	563.105	-0.915814	0.34046	-2.68993	0.00714661	0.0521209	419.395	467.028	570.329	441.837	566.593	377.14	317.452	433.58	618.447	793.849	395.838	431.352	1188.51	670.186	755.05
Gucy1a3	11.5817	-5.7082	2.1234	-2.68823	0.00718312	0.0523604	0.616448	0.636294	0.604068	0.851608	1.69713	0	0	12.1973	0	2.9451	0	18.921	11.1893	124.067	0
Tfec	14.026	4.26032	1.58497	2.68796	0.00718902	0.0523766	24.484	0	17.9943	11.2851	22.4894	27.7587	49.1179	6.17392	30.2047	0	7.67162	9.95821	0	0	3.25284
Anks6	159.195	-0.909086	0.338247	-2.68764	0.00719597	0.052391	141.384	152.45	113.371	117.773	124.754	121.567	142.426	131.673	163.544	165.12	222.108	108.992	320.037	232.752	129.966
Cntn1	22.0564	1.99643	0.742851	2.68753	0.00719835	0.052391	34.2588	21.3155	8.66636	58.5598	15.3975	52.0571	10.8576	19.6949	12.2913	42.8699	10.2161	13.1054	12.6146	10.5104	8.43004
Dmrt2	90.9167	-5.85247	2.17814	-2.68692	0.00721151	0.0524066	1.02017	46.3325	25.9917	0	15.93	0.991381	42.8475	4.11594	232.485	7.7982	7.67162	0	0	77.5289	901.038
Grb14	1137.6	1.38138	0.514108	2.68695	0.00721079	0.0524066	1594.29	811.47	2417.78	1059.68	2619.51	701.563	944.102	895.638	1409.94	800.726	1489.92	638.433	561.714	779.372	339.861
Taf1b	176.223	-0.854431	0.317968	-2.68716	0.00720616	0.0524066	210.155	215.868	190.939	138.242	163.985	79.3105	252.905	213	123.565	133.544	113.156	118.503	262.054	179.824	248.3
Maged1	11961.5	-0.583103	0.217058	-2.68639	0.00722289	0.0524626	10730	10618.3	8754.7	9902.64	10117.5	11313.8	11623.5	15458.4	9640.77	11997.3	13689.9	8636.15	17863.6	15653.8	13422.4
Pcyt2	825.31	0.412299	0.153532	2.68542	0.00724389	0.0525883	1005.09	815.74	895.791	1007.39	813.801	1028.87	791.884	955.45	727.833	767.482	742.166	686.964	764.145	705.978	671.06
Malrd1	7.82381	-4.27606	1.5931	-2.68411	0.00727234	0.052768	4.08067	7.37109	1.99936	2.82127	0	0.991381	3.13518	10.2899	0.915295	2.92433	2.87686	5.97493	3.98561	69.9913	0
Sptbn1	18387.8	-0.812479	0.302722	-2.68391	0.00727661	0.052772	13374.6	17637.8	15323.4	15597.1	14342.1	12864.9	13035.5	16914.4	32389	17131.4	16200.4	15831.9	21630.7	19949.4	33594
Akap1	2423.23	0.415936	0.154994	2.68357	0.00728413	0.0527998	2573.89	2573.36	1825.89	3158.73	2616.14	2636.16	2676.58	2418.62	2790.91	2106.62	2431.89	2235.38	2151.98	1996.61	2155.72
Sort1	616.279	1.24001	0.462325	2.68211	0.00731586	0.0530028	598.285	670.441	424.981	850.35	741.806	1105.85	619.324	452.839	989.184	671.027	653.279	324.52	352.755	147.882	641.666
Wdyhv1	198.203	-0.583031	0.217412	-2.68169	0.0073251	0.0530428	184.65	182.171	189.939	178.68	108.699	169.526	204.832	234.609	205.026	239.795	221.518	169.29	214.227	226.126	243.963
Phldb2	4815.73	-0.956051	0.356655	-2.6806	0.007349	0.0531888	2996.01	4189.67	3161.57	3122.71	3559.93	3177.58	3224.57	3517.22	10054.6	5508.49	5484.45	5110.29	7210.32	6778.28	5140.17
Hook2	251.711	0.726536	0.271083	2.68012	0.00735951	0.0532379	248.921	352.759	275.912	252.973	337.341	239.914	183.931	231.522	315.777	282.685	317.413	235.014	201.274	172.286	127.945
Slc16a1	5070.38	0.907003	0.338538	2.67918	0.00738027	0.0533435	5843.52	6875.12	5298.31	5402.72	3556.14	7450.23	5407.15	6370.45	2810.87	8476.65	4323.92	5489.96	2919.46	2964.4	2866.84
Smurf2	2036.59	-0.796673	0.297364	-2.67912	0.00738159	0.0533435	1987.02	1932.91	1108.24	2173.83	1591.64	1243.87	1790.2	1787.06	2094.37	2174.16	2250.52	1713.28	3745.42	3031.99	1924.39
Islr	363.686	-3.37555	1.26006	-2.67889	0.00738677	0.0533497	69.3222	60.7126	29.8481	30.9834	168.835	52.0556	50.5736	1958.86	85.7549	112.403	194.5	26.657	1386.98	1147.43	80.3769
Pde1a	398.582	1.66528	0.621666	2.67874	0.00738993	0.0533497	251.281	362.681	246.712	171.816	592.972	1157.84	182.217	419.825	310.257	409.925	952.408	314.856	201.058	321.552	83.3285
Sdccag8	581.017	0.710495	0.265266	2.67843	0.00739691	0.053373	708.118	537.719	1218.78	623.234	574.473	571.896	680.578	489.333	617.271	594.273	476.874	541.308	368.151	340.702	372.548
Chrm3	7.42534	4.07197	1.52147	2.67634	0.00744304	0.0536788	3.78798	0.781987	0	1.83907	31.5549	21.6382	0.776082	14.0859	27.8683	1.90625	2.84855	0.739516	1.94855	0.799645	0.805208
Irs2	1662.1	-0.713406	0.2666	-2.67595	0.00745182	0.0537149	1219.1	1506.86	747.761	1641.98	1402.78	1317.55	1318.87	2004.47	2004.5	1736.08	1330.07	1548.5	2167.18	2917.02	2068.81
Gm13237	1322.71	0.62686	0.234295	2.67551	0.00746149	0.0537574	1495.57	1318.37	1557.5	1173.65	2019.36	1450.39	1367.98	1634.03	1000.42	1228.22	1475.83	1112.33	1045.23	892.659	1069.1
Fos	202.134	-1.23145	0.460415	-2.67466	0.00748057	0.0538405	143.53	328.412	134.127	91.9281	54.78	171.017	165.632	381.496	195.142	235.303	177.94	207.093	244.802	272.198	228.607
Pdia5	1390.41	-0.692709	0.258977	-2.67479	0.00747761	0.0538405	1221.14	1642.7	1605.49	959.23	1220.05	845.648	1799.6	1265.65	1624.65	914.34	1483.5	1385.19	2130.31	1362.14	1396.55
Nfe2l2	3448.15	0.685832	0.256454	2.67429	0.00748873	0.053872	3449.34	4056.82	3039.27	4033.85	4021.67	5102.01	2917.85	3772.71	2348.69	4127.45	3744.32	2929.52	3479.24	2837.85	1861.62
Ermp1	3580.08	0.914386	0.341988	2.67374	0.00750115	0.0539342	3279.33	7835.78	3557.11	4634.58	4688.84	4438.65	2835.78	3767.41	2701.83	3397.52	2411.53	2850.69	1645.77	2192.69	3463.75
Jun	7491.22	0.508536	0.190245	2.67306	0.00751619	0.0539987	7755.32	9663.49	10208.7	8095.15	10702.1	6928.76	7982.18	5596.66	6671.58	6759.09	6740.48	7180.87	6361.04	6140.93	5581.88
Pfas	2350.52	0.523803	0.195974	2.67283	0.00752149	0.0539987	2630.56	2505.04	2001.18	3112.22	2384.88	2738.73	2145.83	2231.79	2969.4	2057.16	2594.39	2157.95	1824.82	1640.77	2263.09
Pofut2	2430.73	-0.567517	0.212324	-2.67288	0.00752027	0.0539987	2495.33	2499.85	2091.33	1933.51	2446.66	1751.77	2508.15	2972.74	1984.36	2145.48	2220.94	2323.25	3072.91	3710.62	2304.1
Aldh1l1	18.9795	5.95223	2.22816	2.67136	0.00755441	0.0541805	0	30.113	0	32.2719	0	15.4024	16.2364	74.6168	36.0666	45.5088	23.0862	11.391	0	0	0
Lrrc42	2322.65	-0.587437	0.219893	-2.67146	0.00755212	0.0541805	2445.15	1882.57	2546.18	1666.48	1523.59	2068.51	2879.39	2686.17	1869.21	2717.25	2523.63	2130.75	3207.79	2360.67	2332.4
Lemd3	674.191	-0.65607	0.24575	-2.66967	0.00759262	0.0544271	531.923	626.759	434.367	646.276	695.444	569.397	420.068	774.975	534.884	744.857	562.266	560.011	1031.11	1143.33	837.198
C1qtnf2	44.6476	-3.23345	1.21184	-2.66821	0.0076256	0.0545813	15.6702	75.7591	39.5575	5.09455	13.4834	0	56.3903	7.90284	232.948	13.2037	11.0475	21.9884	5.73945	35.8298	135.099
Gm21685	387.255	-0.435886	0.163352	-2.66839	0.00762166	0.0545813	442.689	432.056	402.731	331.614	333.63	273.248	411.963	369.987	299.619	442.059	357.373	441.868	422.293	433.517	414.181
Iffo1	281.537	-0.506353	0.189764	-2.66834	0.00762276	0.0545813	269.064	255.716	235.011	236.855	225.478	236.133	292.99	428.815	299.763	261.415	259.644	230.715	314.338	387.139	289.985
Lin28b	19.7451	5.7138	2.14203	2.66747	0.00764246	0.0546745	113.239	4.21205	9.99681	20.6893	0	38.6639	1.04506	68.9421	3.66118	9.74776	0	24.8955	0	0	1.08428
Flot2	3673.63	0.344267	0.129107	2.66653	0.00766393	0.0548006	3516.13	3699.97	3663.19	3451.45	4197.71	4307.26	4436.81	3480.91	4216.39	3591.05	3721.84	3404.12	3268.29	2878.2	3271.17
Rgp1	1373.24	-0.607868	0.228014	-2.66593	0.0076776	0.0548708	1140.94	1684.54	1022.16	1149.79	1356.39	1091.02	1157.21	1261.73	1571.69	1428.92	1066.73	1184.88	2115.44	1881.33	1485.82
Ifih1	554.44	-1.55464	0.583255	-2.66545	0.00768843	0.0549171	423.683	828.25	385.546	160.723	487.647	241.875	583.625	530.768	457.356	674.109	138.719	789.5	763.465	1407.98	443.354
Scfd2	503.91	0.934356	0.350562	2.66531	0.00769178	0.0549171	651.334	530.94	530.605	935.543	328.519	506.185	709.546	515.566	348.516	557.656	512.375	505.603	263.887	366.387	295.993
Prl2c3	20.8168	6.83783	2.56574	2.66505	0.00769772	0.054932	35.7059	25.2723	44.9856	0	0	66.4225	54.3432	0	10.9835	0	3.83581	70.7033	0	0	0
Cltb	1454.02	-0.536444	0.20136	-2.6641	0.00771954	0.0550601	1336.04	1218.13	1713.25	1096.04	1014.47	1177.27	1376.9	1464.43	1337.28	1622.22	1619.68	2066.71	1360.72	2051.42	1355.77
[truncated: 19,902 more rows]

## Sheet: DE_G12CvsWT_results
Gene	baseMean	log2FoldChange	lfcSE	stat	pvalue	padj	G12C_A	G12C_B	G12C_C	G12D_A	G12D_B	G12D_C	G12R_A	G12R_B	G12R_C	G13D_A	G13D_B	G13D_C	WT_A	WT_B	WT_C
Gap43	4341.9	6.44294	0.300665	21.429	7.17593e-102	1.05357e-97	9097.12	6175.69	11335.3	6288.58	8716.53	6925.58	3773.77	2483.84	3585.82	2193.07	1983.31	2261.82	85.6218	151.412	71.0246
Ccdc80	3780.12	-3.59611	0.3643	-9.87129	5.5448e-23	3.17712e-19	1049.94	1107.09	745.87	711.882	697.52	676.118	1999.69	3946.12	2417.15	3565.72	1643.79	3042.26	17178.9	10939.5	6980.32
Gm8430	866.628	12.8186	1.30066	9.85546	6.49186e-23	3.17712e-19	1255.83	907.697	2029.35	198.429	243.635	702.889	2061.91	553.595	949.161	1030.34	1464.32	1602.28	0	0	0
2610507B11Rik	8549.74	0.760864	0.0825597	9.21593	3.08603e-20	1.13273e-16	9625.41	10378.3	9004.73	9580.65	9766.04	9981.32	9492.51	8979.53	8795.92	7996.86	9010.96	8510.49	5854.47	5661.09	5607.86
Fam110c	298.572	5.2366	0.577152	9.07318	1.15597e-19	3.39439e-16	581.496	289.578	336.892	590.585	391.69	720.734	226.778	109.073	129.057	360.667	499.615	210.118	1.99281	7.53753	22.7699
Arhgap6	398.754	3.57259	0.410234	8.70867	3.07473e-18	7.52387e-15	569.718	367.556	569.583	563.828	1573.33	633.573	415.666	251.029	456.172	154.071	178.566	121.786	48.7994	42.9388	34.6927
Cxcl14	64.3762	-22.8315	2.6728	-8.54216	1.31737e-17	2.76309e-14	0	0	0	0	241.761	0	5.2253	3.08696	402.73	21.4451	41.235	4.97911	72.7375	149.674	22.7699
Rps6ka6	305.749	3.05931	0.370158	8.26488	1.3984e-16	2.56641e-13	460.375	382.28	468.249	588.625	514.763	490.363	256.339	224.359	360.036	174.133	287.579	221.661	56.1809	20.8033	80.4857
1810011O10Rik	298.001	3.51595	0.428802	8.19948	2.41437e-16	3.93864e-13	479.479	298.002	486.845	480.556	624.081	637.458	365.771	198.594	208.687	142.317	304.947	132.444	18.9317	38.7644	53.1298
Acsl6	302.09	3.71327	0.45871	8.09502	5.72563e-16	8.40637e-13	664.326	267.552	524.557	735.592	398.513	516.085	272.63	154.119	298.93	130.72	254.226	199.905	27.17	23.8308	63.2016
Il33	494.002	5.90422	0.733986	8.04405	8.69165e-16	1.1601e-12	744.408	2649.34	624.727	312.009	777.337	1009.63	170.218	191.491	101.166	174.861	533.434	53.7279	17.9721	13.2428	36.4657
Smarcd3	560.604	-1.13537	0.143379	-7.91867	2.40063e-15	2.93717e-12	456.586	374.46	399.752	373.779	362.636	397.486	640.301	561.103	626.789	487.425	551.788	471.956	835.271	831.299	1038.44
Hhipl1	85.3427	-3.07401	0.395357	-7.77528	7.52808e-15	8.50209e-12	28.5647	33.6964	30.9901	41.3786	32.797	32.7156	32.3969	76.145	51.2565	48.7388	36.4402	49.7911	230.169	169.056	386.004
Atp6v0e2	453.397	4.23305	0.545641	7.75795	8.63163e-15	9.05212e-12	1052.81	567.574	687.78	121.314	767.451	250.819	467.142	426	766.102	367.49	630.032	573.593	28.8957	54.9163	39.0341
Slc6a15	373.301	4.79814	0.619929	7.73982	9.95597e-15	9.7449e-12	585.125	513.316	679.739	626.506	741.027	320.991	298.132	130.454	531.682	634.22	135.89	338.366	8.97635	37.7243	17.3654
Fam84a	166.287	4.92267	0.64062	7.68424	1.5391e-14	1.32924e-11	325.434	386.456	213.932	214.416	372.012	190.345	65.8388	72.029	64.9859	39.9658	271.384	246.964	9.96404	3.23037	17.3485
Ptpn5	113.657	6.41186	0.833885	7.68914	1.48125e-14	1.32924e-11	180.466	151.546	117.894	185.156	220.215	231.849	86.69	81.243	54.886	128.596	228.13	32.8431	0.99845	1.07905	3.2595
AI854703	51.5516	3.17935	0.426946	7.44674	9.56765e-14	7.80401e-11	91.9564	86.3358	93.284	41.418	101.589	78.4049	56.9772	48.5488	53.8489	27.5946	35.1902	28.1904	11.4917	9.03185	9.41176
Lonrf3	156.61	3.56849	0.48031	7.42955	1.0897e-13	8.42053e-11	200.463	208.507	164.426	352.435	188.464	309.994	170.81	77.4474	190.95	77.8015	230.756	128.7	19.1023	15.4826	13.8159
Serpinb2	490.706	5.82106	0.791226	7.35701	1.88069e-13	1.38061e-10	584.966	194.438	464.396	520.943	316.913	900.896	721.539	367.472	65.8242	533.342	2140.24	527.49	9.35542	7.43278	5.34607
Mmp3	10333.2	5.42228	0.746989	7.25885	3.90398e-13	2.72944e-10	7565.57	31041.8	12268.1	15398.5	36074.9	4549.45	13199.1	8138.25	2208.61	9431.93	4224.19	9711.25	270.025	747.292	169.148
Fads3	3239.57	-1.23092	0.170155	-7.23408	4.68691e-13	2.99188e-10	2293.34	2540.92	1995.36	2489.3	2114	2202.85	2691.03	2822.51	3139.46	4027.77	3602.79	2644.9	5528.05	5606.84	4894.45
Pcdhb19	79.0297	-2.93876	0.406029	-7.2378	4.56036e-13	2.99188e-10	28.5647	25.2723	11.9962	27.2722	49.6641	31.7242	156.759	120.391	119.904	30.218	41.235	38.837	242.126	131.368	130.114
Mcpt8	335.862	4.83066	0.66973	7.21285	5.47908e-13	3.35182e-10	839.598	318.01	196.937	618.798	264.25	560.13	420.115	175.957	71.393	673.57	541.808	309.7	11.9568	9.69111	26.0228
Upp1	323.146	4.01167	0.557919	7.19041	6.45981e-13	3.79372e-10	644.443	347.969	234.144	912.636	533.952	518.727	438.557	185.163	180.189	256.281	294.257	224.093	7.58974	48.0571	21.135
Ttc17	942.099	-1.00408	0.140116	-7.16608	7.71781e-13	4.35819e-10	717.26	780.979	612.712	795.681	842.77	831.741	749.695	942.793	972.637	801.178	937.299	910.721	1350.81	1456.19	1429.01
Tln2	859.405	-2.36252	0.33358	-7.08233	1.41753e-12	7.70823e-10	279.582	323.088	395.069	297.88	453.266	253.974	1251.46	944.085	1601.39	829.496	358.978	771.311	1499.73	1602.13	2029.63
Sfrp2	6146.64	-5.24082	0.744636	-7.03809	1.94893e-12	1.02193e-09	584.577	973.332	298.609	1017.14	1243.59	1344.19	1969.96	8023.89	1297.06	1175.39	3385.78	689.203	36427.8	29227	4542.06
Igfbp2	148.03	-7.58923	1.08128	-7.01875	2.23863e-12	1.13337e-09	5.52523	3.42187	2.16571	2.03733	2.27411	0	4.52804	42.3547	2.22129	5.27939	4.15495	7.71038	1237.96	846.791	54.0267
Svep1	3639.63	-5.01641	0.71573	-7.0088	2.40369e-12	1.17637e-09	307.437	732.726	128.581	364.923	702.894	956.742	587.125	6877.83	2431.2	1621	1261.24	804.671	18615.1	13387.5	5815.56
Lox	20331.9	-1.94589	0.278489	-6.98731	2.80214e-12	1.32713e-09	11521	12860.1	7832.57	14515	8214.49	8825.69	14793.2	20845.7	24463.5	22808.6	15929.8	18260.1	46229.8	41800.6	36078.8
Eno1b	10986.1	9.5382	1.3663	6.98105	2.92991e-12	1.34428e-09	41231.1	46964.3	50338.9	67.7104	41.2306	69.3967	214.238	25317.2	65.9012	183.258	85.3468	25.8913	97.6475	38.7644	49.877
Sele	135.447	3.2411	0.473939	6.83865	7.99456e-12	3.55685e-09	138.743	179.012	99.9681	295.292	196.782	204.224	277.986	100.841	177.567	108.2	109.321	99.5821	14.9461	5.38395	23.8542
Plxdc2	681.584	-3.7937	0.556921	-6.81193	9.63011e-12	4.10729e-09	105.316	83.2018	296.142	160.399	105.148	289.234	182.937	497.441	435.474	237.44	559.547	565.415	2097.51	3272.64	1335.92
Serpinh1	7134.09	-1.8463	0.271134	-6.80954	9.79125e-12	4.10729e-09	3877.01	5145.32	2819.5	4595.87	4769.41	5160.88	5687.87	9150.7	5634.2	6274	5206.74	6110.66	15849.2	16734	9996.06
Adamts1	3937.56	-2.35217	0.346162	-6.79501	1.08305e-11	4.41704e-09	1952.05	2754.45	1040	2030.04	1877.21	1701.42	2098.97	4276.6	4599.31	2674.37	2134.43	2587.48	11320.9	10527	7489.13
Gas6	616.989	-5.83795	0.865721	-6.74345	1.54672e-11	6.13754e-09	47.9479	50.5446	31.9898	232.284	21.5523	67.4139	35.5321	285.029	594.026	25.3442	148.638	251.943	1916.08	2278.49	3268.02
Ctsl	20418.2	1.49926	0.2225	6.73827	1.60288e-11	6.19301e-09	27019.1	27662.6	30848.1	27321.1	28167	25137.5	21856.4	14364.6	16857.9	16442.5	22636.1	17703.7	7217.95	10455.6	12582
Galnt10	1440.2	-1.49885	0.224237	-6.68421	2.32181e-11	8.74074e-09	956.912	1131.27	724.512	860.078	1118.36	945.749	1079.62	1756.08	1345.84	1169.65	1396.9	1169.7	2955.63	2746.09	2246.67
Slc14a1	1500.85	7.14202	1.09705	6.51019	7.50566e-11	2.75495e-08	1346.33	2176.86	2908.66	1072.41	8115.36	1059.06	3574.07	769.328	241.679	148.108	385.475	669.968	7.95652	5.73228	31.7469
Nes	7338.04	2.47423	0.382748	6.46439	1.01709e-10	3.51179e-08	11855.1	6749	7434.65	10457	13556.1	9483.57	9522.66	4979.06	6201.35	4772.14	13162.9	7211.39	2064.06	1116.43	1505.2
Rgag4	235.326	1.72607	0.267082	6.4627	1.02852e-10	3.51179e-08	267.101	293.488	531.919	150.911	205.763	175.834	273.619	234.648	293.743	255.217	275.372	243.906	109.401	118.227	100.734
Tro	819.227	1.8491	0.28593	6.46696	9.99961e-11	3.51179e-08	1049.81	1156.33	847.627	988.715	1016.16	1309.94	1291.05	1193.97	1006.67	440.133	781.66	358.895	317.534	218.306	311.597
BC030500	48.7834	5.20534	0.813664	6.39741	1.58038e-10	5.27344e-08	77.8403	36.3205	94.9019	103.275	42.7486	48.043	40.0142	76.7177	46.7953	46.5688	58.0096	53.4477	0	5.44595	1.62253
Myo5c	84.699	10.1716	1.59251	6.38718	1.68977e-10	5.51314e-08	430.511	216.921	21.993	31.9743	39.3565	271.638	27.1716	32.9276	18.3059	8.77298	35.4813	135.432	0	0	0
Adamts5	1390.25	-2.58703	0.408103	-6.33916	2.31018e-10	7.37348e-08	453.975	744.48	391.875	436.356	200.531	443.147	1026.25	1484.83	1190.8	2446.69	1455.69	1024.7	4702.03	2458.31	2394.09
Dbp	60.7601	-2.23934	0.35479	-6.31172	2.75949e-10	8.62016e-08	29.5849	42.1205	25.9917	21.6297	48.727	26.7673	45.9827	34.9855	44.8494	45.8145	36.4402	47.7994	146.471	185.208	129.03
Flywch2	98.1369	2.6809	0.428087	6.26251	3.78822e-10	1.15872e-07	198.034	98.4405	176.228	106.1	74.6972	126.748	149.878	77.0255	82.9811	112.63	92.2761	103.433	30.1115	31.4561	12.0146
Akr1c18	238.567	6.57331	1.0505	6.25731	3.91665e-10	1.16843e-07	922.647	158.732	238.247	302.891	84.1471	474.975	625.724	176.544	28.2528	82.6813	179.376	290.522	10.2728	3.48664	0
Slco4a1	995.876	3.46043	0.55324	6.25484	3.97912e-10	1.16843e-07	632.351	1326.71	407.937	2345.09	1433.54	2585.04	2550.22	529.409	1191.19	273.223	775.205	673.319	85.965	62.4947	66.443
Fmod	131.92	-7.31319	1.17082	-6.24621	4.20522e-10	1.21061e-07	1.97987	5.10903	1.94011	8.00469	27.2786	4.81	2.02818	328.504	55.9547	23.6472	48.9746	38.6524	352.909	979.051	99.9541
Col27a1	185.174	-2.88786	0.462952	-6.23792	4.43419e-10	1.25198e-07	84.9866	79.7582	50.583	64.9339	239.941	95.2363	59.2237	123.651	105.768	96.0298	100.331	88.1452	483.613	729.87	375.54
Inpp5a	1295.99	-0.87047	0.139678	-6.23196	4.60638e-10	1.27605e-07	960.217	1116.62	1138.9	1003.41	836.173	856.148	1283.03	1103.38	1306.58	1327.11	1155.39	1473.13	1898.48	1889.7	2091.59
Itga2	97.6715	4.66053	0.748265	6.22844	4.71091e-10	1.28084e-07	221.376	190.595	231.926	31.9743	161.174	96.1639	24.0364	41.1594	138.21	70.1838	59.4551	173.273	4.98202	5.38395	15.1799
Lrrc75b	161.774	-6.81977	1.0979	-6.21166	5.24287e-10	1.39956e-07	5.10084	9.47711	3.99872	2.82127	15.93	0.991381	4.18024	172.87	36.6118	44.8397	19.1791	14.9373	578.91	1423.52	93.2482
C3ar1	145.744	3.79369	0.613388	6.18481	6.21773e-10	1.63016e-07	254.022	108.46	239.923	154.229	333.593	152.673	164.075	188.304	154.685	77.0073	208.093	107.549	9.96404	3.23037	30.3599
Klf10	730.682	-1.27272	0.207216	-6.14198	8.1498e-10	2.09922e-07	384.603	542.301	434.861	883.056	644.696	729.656	632.262	478.479	708.438	764.224	708.666	758.816	914.698	1118.78	1256.68
Sertad4	972.751	-1.339	0.219943	-6.08792	1.14388e-09	2.8956e-07	607.4	691.614	713.037	620.415	622.79	618.256	680.375	1025.88	1330.9	984.241	779.292	826.904	1491.5	1737.77	1860.89
Adssl1	76.1783	3.00729	0.494246	6.0846	1.16786e-09	2.90619e-07	152.386	127.16	73.997	115.972	102.653	158.067	54.6153	59.981	48.7543	47.7518	84.3337	73.0602	12.0169	4.3288	27.5984
St3gal6	440.166	4.77375	0.786469	6.06985	1.28029e-09	3.13288e-07	484.554	1049.75	1009.09	152.562	430.136	408.639	361.146	281.248	1469.78	105.617	90.1637	666.819	12.1375	30.2815	50.5742
Serpine1	13453.1	-1.8589	0.307135	-6.05239	1.42709e-09	3.43485e-07	5590.88	8356.79	9117.92	5835.46	4136.15	4018.19	15109.4	9641.28	15274	12977.2	8868.23	19204.9	31483.1	29577.5	22605.5
Jag1	635.59	-1.78025	0.29486	-6.03762	1.56405e-09	3.70377e-07	362.186	333.603	363.051	197.871	258.309	316.223	610.17	924.754	949.352	486.993	497.515	596.064	711.579	1322.14	1604.05
Aoc3	59.3743	-4.13463	0.685624	-6.03047	1.63484e-09	3.80995e-07	8.78828	16.1266	9.56865	24.3039	19.3674	16.5237	40.0121	55.1553	17.5219	14.9284	33.0437	30.5015	338.574	224.686	41.5137
Pcdh20	188.167	3.15138	0.523567	6.01906	1.75431e-09	4.02449e-07	230.598	354.995	194.933	203.449	323.15	264.486	134.841	220.618	161.361	126.624	113.497	405.751	46.2263	14.6247	27.3492
Mtss1l	1270.1	-2.17962	0.362904	-6.00604	1.90111e-09	4.29418e-07	723.469	762.794	485.083	690.619	822.607	611.253	703.44	1794.91	996.808	589.581	1092.13	850.577	3635.45	3358.81	1933.92
Areg	179.304	4.05301	0.676399	5.99204	2.07228e-09	4.43344e-07	331.555	306.427	355.886	331.028	161.174	515.518	124.362	29.8406	64.9859	77.0073	178.365	153.356	6.97482	7.53753	45.5398
Fbln5	187.491	-2.52663	0.421726	-5.99116	2.08355e-09	4.43344e-07	73.4521	145.316	65.9789	64.8891	61.8459	36.6811	95.1006	167.725	97.9365	163.762	57.5372	142.402	556.99	531.934	550.815
Marcks	6822.05	-1.16234	0.193904	-5.99442	2.04211e-09	4.43344e-07	6078.16	5108.16	5996.09	3115.62	3190.68	3473.8	4278.48	7280.08	6138.88	6728.88	6350.19	6133.26	11046.1	15184.9	12227.4
Sh3bgrl2	1352.43	2.99851	0.49991	5.99811	1.99632e-09	4.43344e-07	1764.01	1188.9	1629	3162.67	4252.51	1283.72	1858.02	701.503	995.027	619.207	1375.94	881.009	321.006	119.272	134.668
Gspt2	187.542	1.84198	0.308099	5.97853	2.25162e-09	4.72261e-07	264.405	174.299	273.47	234.274	215.565	210.908	254.22	168.781	162.923	254.32	232.788	169.107	91.333	59.2391	47.4973
Foxf1	37.3656	-5.12166	0.85704	-5.97598	2.28709e-09	4.72945e-07	7.14118	3.15904	2.99904	6.58295	4.68529	7.93105	20.9012	17.4928	12.8141	1.94955	9.58953	1.99164	80.7087	342.419	40.1184
Jazf1	38.5467	-2.22164	0.372171	-5.96939	2.38139e-09	4.85605e-07	13.8878	26.2809	21.4139	14.6079	17.3355	14.4791	42.68	40.8562	43.5415	20.8197	11.1718	23.7236	111.245	99.3132	76.8443
Efnb1	855.554	-2.27158	0.382452	-5.9395	2.85894e-09	5.75e-07	434.371	518.411	375.416	391.829	482.106	406.383	431.065	789.539	637.351	505.835	548.662	901.01	1727.95	3548.44	1134.94
Gm5124	143.562	2.57641	0.434168	5.93414	2.95394e-09	5.86079e-07	228.743	216.351	196.921	265.42	299.663	121.904	209.355	64.3796	120.242	84.5052	114.644	123.714	38.7579	32.3336	36.4983
Nid2	1874.59	-4.13781	0.699908	-5.91194	3.38093e-09	6.61851e-07	486.62	358.024	77.9751	519.113	334.53	462.975	697.056	4742.6	572.059	950.406	1499.8	1177.06	6301.26	7049.74	2889.61
Krt18	93.5904	6.69666	1.13366	5.90709	3.482e-09	6.72668e-07	141.803	57.9157	241.923	36.6765	44.0417	327.156	13.5858	63.7971	23.7977	107.225	76.7162	264.888	0	1.07679	3.25284
Stk40	991.865	-1.25938	0.213863	-5.88871	3.89217e-09	7.42141e-07	606.241	869.942	638.074	729.817	801.354	708.198	890.138	1030.93	1067.23	835.227	687.989	952.199	1864.75	1946.87	1249.03
Col1a1	76637.2	-2.46126	0.421938	-5.83322	5.43692e-09	1.02339e-06	38126.8	45503.2	22865.8	29917.3	34887.3	35621.8	26998.9	116288	63328.5	54883.5	44693.1	49976.1	238924	224645	122898
Nrcam	76.3503	6.89471	1.18597	5.81355	6.11604e-09	1.13665e-06	145.799	41.372	341.629	115.488	17.751	35.4734	46.1928	64.9746	36.7532	13.7389	224.386	57.1398	0	1.13322	3.42331
Mctp1	56.4939	4.50347	0.775505	5.80714	6.3548e-09	1.16627e-06	93.117	54.7129	118.266	114.948	171.949	70.0839	23.401	34.645	84.2261	14.8252	28.1752	25.0969	8.54223	3.48315	1.93655
Apbb2	2268.79	-0.97161	0.168034	-5.78222	7.37207e-09	1.33626e-06	1933.98	1807.38	1578.52	2154.9	2366.98	2038.2	2056.41	2170.35	2405.32	1683.03	2091.45	1312.69	3509.1	3531.99	3391.5
3110039M20Rik	75.8248	2.53179	0.438466	5.77421	7.7315e-09	1.38432e-06	114.259	98.9832	71.977	157.991	130.251	113.017	61.6586	47.3334	43.0189	47.764	137.13	64.7284	17.9353	17.2286	14.0957
Pawr	747.592	-1.93131	0.334819	-5.76823	8.01079e-09	1.41704e-06	446.834	282.207	348.889	687.448	493.83	776.251	477.593	864.348	461.309	502.984	799.767	960.967	1469.7	1650.72	991.033
Gcat	1052.98	0.987163	0.171477	5.75681	8.57179e-09	1.49823e-06	1325.25	1283	1347.07	1255.08	1273.88	1274.85	1223.58	1294.15	819.187	828.566	887.487	986.872	597.97	709.766	688.005
Pappa	223.421	-4.04737	0.705728	-5.73503	9.74973e-09	1.66448e-06	63.2504	70.5518	13.9955	20.6893	33.7341	86.2501	32.3969	95.6957	294.725	50.6883	63.2909	83.649	877.831	630.999	933.566
Spp1	45677.5	3.22128	0.561522	5.73669	9.65424e-09	1.66448e-06	94994	64631.6	39909.2	44414.9	59621.9	105630	62557.2	16939.4	23959.2	22042.7	95289.1	33778.4	6914.42	5527.04	8953.75
Myom1	71.9484	-3.45938	0.603866	-5.72872	1.01191e-08	1.70769e-06	33.4876	19.4311	19.4718	15.3116	12.6294	9.14689	33.2173	28.4815	16.8898	34.9754	27.5262	31.6471	501.134	232.203	63.6739
Neurl1b	42.076	-3.54406	0.619203	-5.72357	1.04305e-08	1.74024e-06	20.1673	9.91264	6.58742	17.9936	13.2317	25.1977	25.5783	22.0611	6.03136	13.7642	22.568	20.6234	211.044	147.993	68.3869
Nuak1	1723.18	-2.54666	0.445423	-5.7174	1.08168e-08	1.7844e-06	768.343	927.695	429.953	1083.86	993.62	1030.59	763.272	1429.64	2891.76	794.94	703.233	1609.55	3210.13	4123.23	5087.82
Plekhh1	45.9183	7.58465	1.32705	5.71542	1.09431e-08	1.78518e-06	32.6454	56.8627	21.993	109.089	95.58	91.207	91.9654	45.2754	49.4259	7.7982	44.1118	42.8203	0	0	0
Procr	449.531	2.11156	0.369655	5.71224	1.11496e-08	1.79888e-06	573.891	494.444	797.977	653.586	699.063	415.058	476.837	335.269	278.549	261.517	660.149	664.539	159.37	153.52	119.195
Wsb2	4219.94	-0.84331	0.147748	-5.70775	1.14479e-08	1.82694e-06	3381.54	3557.62	3137.93	2899.28	3281.43	2813.97	4534.76	4404.86	4368.03	5104.83	3375.15	4361.55	6295.82	5960.56	5821.79
Ablim1	486.597	-3.8208	0.671827	-5.68717	1.29159e-08	2.03904e-06	159.849	133.069	23.6849	123.051	97.5169	48.5144	180.153	1028.19	273.061	162.857	399.277	199.065	1936.24	1309.93	1224.5
Prss22	171.211	5.05334	0.888842	5.6853	1.30582e-08	2.03958e-06	613.121	86.347	105.966	243.569	130.251	293.449	244.544	122.449	39.3577	85.7803	505.368	73.6908	6.97482	6.46074	10.8428
Ldlrad3	604.444	-1.11796	0.196713	-5.68321	1.32189e-08	2.04295e-06	426.849	392.61	414.196	584.467	545.516	589.493	450.492	733.872	681.772	452.056	611.004	506.862	940.258	783.325	953.894
Slc1a4	1240.96	-1.42561	0.25157	-5.66685	1.45445e-08	2.2244e-06	924.443	974.26	606.257	1132.15	988.149	872.519	684.061	1272.81	866.11	1015.22	1357.29	1192.86	2374.13	2014.11	2340.05
Ndrg2	703.905	2.6263	0.463646	5.66445	1.47498e-08	2.23254e-06	1240.45	530.836	644.83	1400.1	1041.11	1127.39	683.454	1222.42	418.247	557.309	958.223	342.69	86.6366	134.637	170.233
Etv5	2567.65	1.31654	0.233389	5.64098	1.69085e-08	2.53316e-06	3573.1	3609.67	2172.66	3089.36	3745.55	3152.2	2697.17	2689.15	2479.91	1960.82	3314.6	2274.57	1292.05	1328.77	1135.23
Kcnh1	67.2933	6.97055	1.24373	5.60457	2.0877e-08	3.09613e-06	128.056	114.085	65.2301	106.518	263.444	68.3501	52.7517	30.4041	49.8356	21.4007	95.6298	11.034	0	1.32569	1.33491
Ugt1a7c	128.024	3.28116	0.58625	5.59686	2.18271e-08	3.20466e-06	270.144	279.556	157.489	85.909	237.974	202.39	88.3297	92.8746	45.8765	149.949	126.774	107.561	52.8531	15.669	7.01245
Slc9b2	24.2324	4.21915	0.755413	5.58522	2.33403e-08	3.39289e-06	61.2969	48.3614	24.2836	24.9217	94.3749	17.2361	18.3505	5.70248	18.6447	11.5684	18.44	13.128	2.93534	2.46723	1.77457
Rasgrf1	189.734	7.59051	1.36086	5.57772	2.43695e-08	3.50777e-06	857.853	290.711	158.878	29.4749	330.577	156.741	110.909	213.771	17.4933	24.4939	53.4236	595.109	3.62785	0	2.94204
Il18rap	730.716	2.23551	0.401233	5.5716	2.52411e-08	3.56337e-06	919.501	1604.92	772.799	720.612	924.488	840.492	518.665	675.314	1310.85	783.341	367.503	822.976	273.42	183.761	242.107
Sox7	147.656	4.8422	0.868948	5.57248	2.51138e-08	3.56337e-06	240.76	408.569	112.964	83.6975	643.759	121.94	135.858	53.5073	195.873	22.4198	115.074	53.7743	4.98202	3.23037	18.4328
Prl2c2	455.952	4.1114	0.738746	5.56537	2.6159e-08	3.65777e-06	903.869	155.846	885.717	173.038	60.9088	305.345	315.608	573.145	187.635	578.042	766.203	1821.36	33.8777	66.761	11.9271
Dyrk3	238.718	2.19359	0.394588	5.55919	2.7103e-08	3.75402e-06	318.905	275.451	276.229	474.212	306.399	371.312	397.63	226.344	195.894	144.878	170.405	232.544	43.5696	40.0721	106.93
Ankrd13a	3627.04	-0.904638	0.162917	-5.55277	2.81177e-08	3.82245e-06	2448.98	3096.73	2931.58	3100.23	3221.16	2566.74	3669.45	3558.87	4407.9	3327.14	2701.11	3505.83	4746.45	5329.47	5793.93
Pgd	5359.97	0.811885	0.146175	5.55418	2.78923e-08	3.82245e-06	6144.54	6221.97	6593.01	6034.14	5257.46	5364.8	6464.99	4791.55	4722.35	5661.54	6801.06	5542.01	3579.91	3754.01	3466.23
Glce	1285.77	-1.37473	0.247715	-5.54962	2.86284e-08	3.85616e-06	1003.93	825.845	790.752	1172.7	1025.63	690.161	1190.7	1029.9	1443.93	1344.67	1121.81	851.404	2621.81	1847.13	2326.16
Slc1a6	376.967	-4.53585	0.817838	-5.54615	2.92035e-08	3.89787e-06	27.5445	34.7494	122.961	0.940422	7.49647	12.888	311.428	401.305	71.393	178.384	118.91	67.7158	2922.45	1035.87	340.464
Ptpn22	186.23	5.16272	0.932031	5.53922	3.03827e-08	4.01873e-06	367.369	140.098	402.269	264.988	110.533	176.327	464.224	72.2398	21.4709	162.383	234.86	350.194	0.918767	16.3533	9.22613
Aspn	722.42	-5.61185	1.01527	-5.52745	3.24927e-08	4.25945e-06	43.6573	102.407	40.7908	64.0015	425.206	21.9014	38.7624	59.4908	432.226	138.79	138.11	195.194	2147.28	2869.03	4119.46
Dcn	3409.01	2.69703	0.488613	5.51976	3.3947e-08	4.41071e-06	7806.33	4644.84	4111.69	1812.19	6247.37	3242.81	2692.08	2292.58	4217.68	5925.66	4085.14	1502.69	887.796	963.727	702.614
Pik3r3	486.961	-1.4312	0.259686	-5.51124	3.56309e-08	4.58888e-06	345.141	280.952	255.412	434.05	369.196	312.928	335.035	528.085	636.069	517.13	559.878	353.325	774.304	804.94	797.974
Slitrk6	42.2807	7.75939	1.4099	5.50352	3.72284e-08	4.75294e-06	131.602	46.3325	66.9786	39.4977	89.0206	109.052	18.8111	34.9855	1.83059	19.4955	27.8096	47.7994	0.996404	0	0
Gstm4	155.633	1.90315	0.346517	5.49224	3.96877e-08	5.02323e-06	215.663	194.784	187.633	162.934	184.673	209.336	211.406	83.691	205.352	186.687	165.495	166.141	36.325	56.1404	68.2288
Ncald	83.6717	-3.21214	0.58577	-5.48362	4.16714e-08	5.22923e-06	35.87	22.8202	22.812	45.0241	31.3434	10.5658	20.9338	52.9107	81.164	89.3755	45.2175	31.6648	213.967	221.634	329.774
Col5a2	25558.6	-1.62759	0.297126	-5.47777	4.3071e-08	5.32759e-06	13081	18829	11002.2	15941.7	10386.6	16903.4	21733.1	32891.6	36649.4	30612.6	17793.3	24958.2	46171.5	51192.4	35232.8
Gm15459	4101.62	9.80443	1.79	5.47732	4.3181e-08	5.32759e-06	2367.81	27898.5	28.9907	77.1146	25.3006	31.7242	30735.2	197.565	27.4588	32.1676	57.5372	10.954	7.97123	15.0751	10.8428
Kmt2c	802.516	-1.41852	0.262531	-5.40323	6.54525e-08	8.00812e-06	466.026	641.271	453.485	808.794	787.28	571.488	568.359	654.895	843.981	925.222	554.2	587.994	1663.86	1308.42	1202.47
Arap3	140.5	3.41734	0.632823	5.40015	6.65863e-08	8.0795e-06	334.615	107.407	170.945	351.718	149.929	216.121	233.049	114.217	191.297	23.3946	104.526	52.7785	10.9604	10.7679	35.7813
Bnc1	151.738	5.21795	0.967611	5.39262	6.94388e-08	8.33221e-06	213.215	667.61	471.849	110.029	313.915	43.6208	75.2444	29.8406	116.242	103.326	73.8394	20.9122	4.98202	0	31.4442
Setbp1	1135.03	-2.85307	0.529161	-5.39167	6.9804e-08	8.33221e-06	246.881	634.966	286.908	249.212	432.921	532.372	492.224	1228.61	1435.18	1877.42	542.767	622.388	3668.76	2382.94	2391.93
Lurap1l	2265.03	-1.59818	0.297038	-5.3804	7.4322e-08	8.79997e-06	1324.18	1495.28	1630.48	826.631	495.704	650.346	2169.55	2076.49	2282.75	3003.28	1737.62	2810.21	3648.83	6622.26	3201.88
Zfpm1	149.24	-2.16672	0.40295	-5.37714	7.56767e-08	8.88868e-06	91.3188	47.6281	68.8237	108.192	96.3648	89.8057	76.808	164.754	88.409	154.927	91.0324	232.598	397.592	272.262	258.089
Papss1	2122.87	0.64444	0.119881	5.37565	7.63065e-08	8.89153e-06	2515.73	2808.38	2388.24	2185.54	2333.28	2349.57	2173.73	2045.62	2144.54	1971	2061.75	1930.9	1432.83	1605.49	1896.41
Creld1	580.183	1.38156	0.257245	5.37062	7.84671e-08	8.93065e-06	724.787	602.941	769.424	589.748	485.029	866.196	719.106	588.4	485.032	642.94	874.008	550.217	278.827	251.274	274.816
Errfi1	8739.8	1.90142	0.354005	5.37115	7.82354e-08	8.93065e-06	11394	11752.3	7691.03	14343.5	7998.53	11682	10481.1	5297.08	6127.43	16261.2	13044.2	6770.25	3294.28	2625.87	2334.22
Tac1	64.4266	5.6572	1.05331	5.37089	7.83489e-08	8.93065e-06	141.306	77.8734	108.274	29.4631	230.58	37.5234	122.797	58.439	70.345	5.163	49.2345	28.4911	0	3.47122	3.43847
Ncor2	4924.04	-0.779889	0.14537	-5.36485	8.10156e-08	9.14978e-06	4217.72	3878.19	3740.94	3730.69	4176.24	4386.75	4409.36	4619.31	6137.91	5072.42	4719.46	4445.94	6469.93	6512.18	7343.52
Ptprd	278.767	-2.87957	0.537853	-5.35382	8.61144e-08	9.65138e-06	76.1852	127.806	127.886	220.337	66.7588	59.8476	123.464	48.2109	149.192	392.042	187.15	160.744	759.989	1016.76	665.137
1190002N15Rik	797.238	-1.87866	0.351133	-5.35028	8.78158e-08	9.76667e-06	369.301	452.795	520.834	424.13	438.543	440.173	498.494	1223.46	768.848	687.217	631.95	564.631	2196.07	1874.69	867.425
Atp6v0a2	2090.86	-0.707933	0.13235	-5.34893	8.84734e-08	9.76667e-06	1717.96	1868.04	1427.54	1885.55	1666.09	1672.46	2235.39	2184.54	2612.25	1938.83	1894.89	2070.31	2530.86	2904.1	2754.08
Klra2	58.9547	2.54658	0.476323	5.34633	8.97541e-08	9.8341e-06	64.9795	67.0716	43.1028	93.9971	68.64	88.4994	74.7577	40.3331	105.207	81.0358	76.1156	50.743	8.78758	7.23804	13.8127
Id2	594.71	-1.58967	0.297439	-5.34451	9.06621e-08	9.86001e-06	381.543	409.622	500.84	337.611	248.321	271.638	384.582	686.334	372.525	384.062	540.849	513.844	1284.36	1703.48	901.038
Hmga1	38518.8	1.59825	0.299871	5.32979	9.83281e-08	1.06151e-05	56210.9	45140.1	54902.6	48442	43218.3	49583.4	57023	26094	27375.3	29021.7	48660.4	40502.9	15896.9	14400	21310.3
1500009L16Rik	192.284	1.87643	0.352372	5.32515	1.00868e-07	1.07974e-05	345.837	279.048	386.876	126.957	272.684	124.914	205.877	142	201.365	122.822	205.216	195.181	101.633	104.449	69.394
2900011O08Rik	61.8647	4.58865	0.861875	5.32404	1.01488e-07	1.07974e-05	199.185	60.2621	34.7939	90.4123	112.963	93.1265	79.9555	52.089	16.8638	47.7747	56.8007	71.2729	0	10.6301	1.8409
Rpl34-ps1	783.17	25.0536	4.71166	5.31736	1.05286e-07	1.11209e-05	0	0	4034.71	0	0	0	3603.37	2251.42	1858.05	0	0	0	0	0	0
Arhgef19	402.968	-1.96866	0.371114	-5.30474	1.12832e-07	1.18329e-05	241.445	164.259	114.134	291.04	330.394	336.284	235.03	362.792	486.651	673.077	453.887	319.277	926.322	528.781	581.142
Mafb	152.981	-4.64948	0.877649	-5.29765	1.17303e-07	1.22145e-05	13.2622	10.5301	10.9965	22.5701	29.9859	15.8621	54.3432	944.609	44.8494	75.0577	147.679	51.7827	309.881	386.567	176.738
Slc17a6	47.3057	6.25115	1.18381	5.28054	1.288e-07	1.33172e-05	47.9479	219.027	299.904	11.2851	17.8041	5.94829	0	0	0	2.92433	8.63058	88.6281	0.996404	2.15358	4.33713
Rabggta	644.418	0.924428	0.17572	5.2608	1.43434e-07	1.47265e-05	822.169	695.845	866.929	861.644	804.847	637.449	703.965	579.372	534.986	602.694	629.283	669.96	390.844	481.746	384.537
Spon2	35.1985	-9.23782	1.75681	-5.2583	1.45395e-07	1.48243e-05	0	0	0	0	10.3076	5.94829	9.40555	123.478	3.66118	8.77298	16.3022	8.96239	190.313	139.983	10.8428
Mmp14	10680.6	-1.26621	0.240875	-5.25673	1.46642e-07	1.48482e-05	6507.65	8961.13	7099.73	6912.1	8686.53	5544.79	8062.65	13175.1	12533.1	9421.21	8634.41	10386.4	18987.5	20985.6	14310.3
Svip	114	2.71774	0.517984	5.24676	1.54796e-07	1.55666e-05	270.345	104.248	183.941	76.1742	306.418	186.38	80.4697	59.6812	85.1224	54.5874	112.198	105.557	31.8849	20.459	32.5284
Avpr1a	168.756	-5.09086	0.97406	-5.22643	1.72817e-07	1.70288e-05	3.0605	24.2193	23.9923	0.940422	4.68529	0.991381	18.8111	151.261	410.967	30.218	40.276	74.6866	127.54	344.573	1275.12
Ephb3	757.42	-1.51215	0.289309	-5.22676	1.72503e-07	1.70288e-05	418.842	680.911	432.188	370.568	403.794	452.77	514.275	1100.92	904.206	434.017	651.622	626.3	1500.41	1557.67	1312.8
Foxn3	1144.54	-1.27978	0.244796	-5.22795	1.71399e-07	1.70288e-05	818.195	999.21	694.512	900.851	957.171	798.167	734.016	983.767	973.211	1263.25	938.918	1008.95	2745.51	1879.75	1472.65
Kdr	271.951	-3.52158	0.675366	-5.21433	1.84479e-07	1.80568e-05	62.9667	120.553	43.7886	86.6298	27.0528	140.66	170.751	165.948	140.295	201.355	59.1884	250.812	1683.02	636.965	289.284
Rorb	79.1162	3.58386	0.688584	5.20468	1.94334e-07	1.88955e-05	161.311	139.662	111.628	107.506	65.2372	94.7887	33.0872	64.3293	105.464	25.6608	170.689	75.284	2.58379	13.8325	15.6792
Pag1	257.462	-3.87342	0.74504	-5.19894	2.00427e-07	1.93597e-05	55.0797	59.9982	44.2993	31.8414	31.3687	106.144	46.8603	189.266	115.826	497.293	141.394	209.51	887.79	1329.39	115.865
Ccl5	514.311	2.77872	0.534925	5.1946	2.0516e-07	1.96873e-05	1352.58	695.539	647.239	313.606	435.565	304.124	1574.8	545.232	246.476	385.337	344.146	477.145	93.8716	194.256	104.751
Nefl	42.051	7.52463	1.45051	5.18758	2.13048e-07	2.03115e-05	114.259	57.9157	35.9885	30.0935	162.111	22.8018	88.8302	66.8841	15.56	5.84865	12.4664	16.929	0	1.07679	0
Dusp8	351.625	-1.63449	0.315489	-5.18082	2.20908e-07	2.0925e-05	185.285	316.91	209.155	347.829	240.814	166.817	206.554	251.014	223.777	366.431	243.321	312.964	762.053	911.286	530.173
Bcl6b	98.1947	4.3076	0.83342	5.16858	2.3588e-07	2.17811e-05	167.956	123.57	70.5539	131.671	209.573	233.673	75.6392	29.9602	124.381	63.8078	172.217	49.4122	0	17.7408	2.76625
Pde5a	199.134	-3.12856	0.605183	-5.1696	2.34592e-07	2.17811e-05	55.0891	82.135	66.9786	54.5445	83.3982	75.3449	74.1993	251.073	104.344	156.939	97.8132	99.5821	687.518	980.955	117.102
Sema6b	69.5975	2.61131	0.504892	5.172	2.31597e-07	2.17811e-05	94.5835	88.3032	113.301	111.532	66.4914	98.577	157.928	44.5923	49.836	53.0746	64.9999	52.3574	13.2862	22.0067	13.0945
Ttc12	198.885	2.04817	0.396212	5.16938	2.34878e-07	2.17811e-05	325.723	282.992	304.731	162.324	224.198	116.33	261.509	178.118	307.708	271.82	155.336	171.563	45.6917	53.4534	121.783
Atp6ap1	7746.27	-0.765621	0.148529	-5.15469	2.54046e-07	2.33119e-05	6146.78	7497.66	5436.9	7626.29	7324.57	6589.71	6762.93	7813.57	6769.18	7242.28	6853.69	7694.13	10775.3	12124	9537
Enkd1	508.152	1.05731	0.20595	5.13382	2.83918e-07	2.57314e-05	587.617	553.884	810.741	570.836	493.83	683.061	644.803	562.855	530.871	369.44	455.503	420.236	276.004	296.117	366.487
Igsf11	88.8658	6.86862	1.33772	5.13458	2.82779e-07	2.57314e-05	46.0715	184.927	186.113	167.311	253.955	9.13703	10.595	60.2357	39.6892	74.5671	15.9087	280.845	1.64565	1.98484	0
Fgd1	1397.51	-0.870018	0.169636	-5.12874	2.91691e-07	2.62737e-05	1186.85	1050.34	912.609	1323.73	1259.87	1464.86	1224.98	1567.76	1252.18	1357.65	1475.26	1129.85	1959.71	2133.07	1663.9
Bex2	31.3498	4.75005	0.928048	5.11833	3.08254e-07	2.72838e-05	93.8554	32.6434	101.967	70.5316	12.1818	29.7414	56.4333	16.4638	14.6447	3.8991	14.3843	14.9373	0.996404	3.23037	4.33713
Gm7233	15.2428	7.79454	1.523	5.11788	3.08983e-07	2.72838e-05	90.7949	21.0602	16.9946	37.6169	7.49647	10.9052	14.6309	3.08696	2.74588	6.82343	11.5074	4.97911	0	0	0
Ifi202b	55.249	24.1109	4.71187	5.11706	3.10339e-07	2.72838e-05	0	0	828.735	0	0	0	0	0	0	0	0	0	0	0	0
Mia3	2054.19	-1.09134	0.213178	-5.1194	3.06512e-07	2.72838e-05	1461.63	1445.89	1234.62	1996.33	2163.07	2335.09	1269.4	2105.14	2024.75	2458.13	1897.36	1596.33	3047.58	2753.94	3023.54
Zbtb7c	99.2378	-4.1067	0.803501	-5.11101	3.20433e-07	2.80035e-05	19.345	38.0752	4.73912	4.00048	2.66535	6.32588	11.8902	89.7561	159.637	15.7116	28.5552	49.0966	543.91	224.448	290.411
B3gnt3	63.0632	2.87052	0.562242	5.10549	3.29934e-07	2.86632e-05	81.6134	142.157	114.963	116.612	171.482	50.5604	50.1629	31.8986	71.393	12.6721	17.2612	38.837	13.9496	20.459	11.9271
Lepre1	1538.65	-1.49085	0.292284	-5.10068	3.38431e-07	2.92285e-05	834.093	1028.34	1018.38	842.777	1184.9	995.182	1293.08	2148.2	1397.69	1197.66	1670.61	1372.72	3206.56	3294.54	1595.09
Dkk2	3938.54	2.65115	0.520653	5.09197	3.54365e-07	3.04256e-05	5405.87	6255.95	6020.08	6784.2	8415.72	4057.72	3804.02	2514.84	3973.29	2479.83	1883.38	4668.41	886.799	1688.41	239.626
Foxp2	125.186	-3.78179	0.745226	-5.07469	3.88137e-07	3.31315e-05	30.8891	28.9802	34.7779	58.3294	31.2749	11.1369	35.268	77.9128	90.3431	84.3278	39.3161	50.3436	612.422	643.615	48.8579
Per2	172.482	-1.97505	0.389308	-5.07325	3.91088e-07	3.31905e-05	100.996	103.264	56.9532	143.645	108.521	151.429	85.8917	211.426	164.13	200.288	115.535	117.187	456.587	258.458	312.916
Afap1	1658.01	-1.4636	0.288624	-5.07096	3.95818e-07	3.33988e-05	899.745	1484.8	901.604	1082.87	1330.09	743.504	1441.51	2038.64	2189.47	1337.96	1051.07	1306.88	3620.03	3201.54	2240.5
Foxg1	3806.43	2.0779	0.410348	5.06375	4.11079e-07	3.40641e-05	6418.36	5052.54	3591.58	6586.32	6465.61	6205.23	2666.37	1938.24	2780.07	2472.69	5898.13	3454.09	1890.32	520.766	1156.1
Gna12	2961.52	-0.790568	0.156143	-5.06309	4.12507e-07	3.40641e-05	2189.28	2644.11	2200.3	2174.26	2419.49	2309.92	2790.31	2936.73	3565.07	3168.02	2849.05	3009.37	3311.05	4600.05	4255.81
Sncaip	31.4816	-6.99625	1.38187	-5.06287	4.12983e-07	3.40641e-05	0	0.924805	1.96867	1.49018	0	0	6.17412	71.8071	10.7398	3.08924	0	4.48458	97.5899	239.569	34.3868
Tspyl4	221.203	-2.00653	0.396287	-5.06332	4.12008e-07	3.40641e-05	111.198	149.528	111.964	110.029	182.726	64.4398	119.137	291.203	324.93	113.074	111.239	131.448	555.993	469.48	471.662
Runx1t1	492.812	-2.2177	0.438655	-5.05568	4.2886e-07	3.51761e-05	180.148	271.99	240.151	159.542	403.213	355.5	244.714	345.409	637.894	647.815	330.124	354.698	1518.84	766.895	935.238
Rpl30-ps9	91.5924	-23.7734	4.71209	-5.04519	4.53063e-07	3.69549e-05	0	0	0	81.8167	0	0	0	0	591.28	194.955	0	0	265.043	144.29	96.5011
Txn2	5098.08	0.744226	0.148154	5.02332	5.0785e-07	4.11948e-05	5740.3	6167.67	6870.57	5227.03	4843.65	6264.41	5463.69	4829.11	4663.8	4701.31	5104.13	5384.02	3183.34	3883.05	4145.14
Dusp22	233.743	1.63803	0.32617	5.02201	5.11331e-07	4.12492e-05	335.034	270.837	467.664	218.72	304.839	229.477	311.184	149.686	199.074	174.803	302.588	197.806	122.18	105.592	116.666
Cisd3	445.061	1.67027	0.334113	4.9991	5.75975e-07	4.62102e-05	596.197	393.862	847.775	423.791	382.335	719.701	510.308	302.007	372.053	450.673	623.93	475.915	215.815	163.007	198.546
Btn1a1	33.5434	7.13481	1.42951	4.99108	6.00417e-07	4.79094e-05	112.939	18.8518	23.2252	156.974	29.6077	85.5927	2.91354	1.91248	2.55176	11.7762	31.1906	24.6085	0	0	1.00763
Adamtsl3	968.56	-3.43194	0.689219	-4.97946	6.37613e-07	5.06023e-05	315.274	342.205	28.3121	836.242	896.597	544.588	437.517	966.517	499.883	604.015	804.691	858.847	2565.28	4180.74	647.694
Col5a1	18267.3	-1.54007	0.309455	-4.97672	6.46696e-07	5.10472e-05	11937.7	15485.4	8862.9	9508.75	10720.9	13491.1	10125.2	24660	17820.2	16422.9	13123.8	16325.8	39170.6	39125.6	27229.2
Ugt1a6b	35.0722	6.11333	1.22979	4.97104	6.65938e-07	5.2285e-05	146.943	63.7104	84.677	38.8071	59.1328	34.9892	25.2917	14.1537	6.46077	11.7954	35.7787	0	0	4.3432	0
Gzme	78.3612	4.08736	0.823896	4.96101	7.01266e-07	5.47659e-05	185.671	95.8241	43.986	45.1402	23.4265	74.3536	35.5321	62.7682	32.0353	40.9406	241.656	274.847	2.98921	2.15358	14.0957
Fat4	2762.35	-3.36052	0.678796	-4.95071	7.39437e-07	5.74413e-05	672.77	1498.5	432.492	809.97	769.728	847.006	600.383	3360.44	686.902	2609.7	1294.58	1110.08	11446.7	13028.7	2267.24
Gsto2	88.3667	3.51876	0.710978	4.94918	7.45286e-07	5.7591e-05	168.904	119.086	198.811	128.062	79.8672	62.1588	182.872	25.064	79.7138	23.8741	105.293	109.265	7.80922	12.0821	22.6379
Gprin3	52.3584	-4.45125	0.900688	-4.94206	7.73034e-07	5.94224e-05	8.16134	13.6892	1.99936	9.40422	6.55941	26.7673	7.31543	27.7826	7.32236	104.301	26.8507	24.8955	254.083	226.126	40.1184
Ddr1	2083.15	-1.87565	0.380174	-4.93366	8.07019e-07	6.1392e-05	1113.06	1425.44	937.431	722.554	896.6	1677.89	1356.64	2659.91	1686.92	2617.69	1761.06	1637.93	5561.79	4613.53	2578.81
Emilin1	3204.39	-2.32355	0.470868	-4.93462	8.03074e-07	6.1392e-05	1485.36	1712.2	1009.68	1009.07	1825.39	1271.94	1885.29	7082.51	2433.77	3498.47	1821.05	1971.73	7703.2	9182.86	4173.4
Maml2	1175.68	-2.25562	0.457869	-4.92634	8.37861e-07	6.34097e-05	378.963	727.78	419.584	649.976	912.808	648.423	594.893	1193.53	1616.15	1952.34	569.668	685.405	2769.97	2322.8	2192.84
Tfap4	582.969	0.965504	0.196257	4.91959	8.67263e-07	6.52982e-05	766.146	686.564	674.785	688.389	759.017	672.156	666.749	583.435	491.513	428.901	674.144	563.635	412.511	311.192	365.403
Mfap4	460.479	-3.1193	0.634407	-4.91688	8.79345e-07	6.58701e-05	141.859	120.661	103.108	90.4037	582.707	183.659	308.083	790.329	1223.76	87.8495	72.0196	25.9267	1609.92	871.48	695.428
Timp3	10695.4	-2.38338	0.484951	-4.91468	8.89261e-07	6.62748e-05	5297.55	7422.4	2220.27	4022.04	6938.28	3427.19	5266.81	14786.5	11074.1	7961.59	5717.92	8344.49	26645.7	38127.9	13177.5
Erbb2ip	3739.78	-1.71617	0.350001	-4.90333	9.42273e-07	6.92103e-05	1981.88	2540.22	2032.56	3340.36	3390.05	2800.72	1306.31	2902.32	3562.29	5148.42	2503.46	3052.47	8946.35	6963.56	5625.78
Lsm14a	2563.29	-0.594424	0.1212	-4.9045	9.36646e-07	6.92103e-05	2124.32	2397.3	2044.64	2535.25	2381.6	2500.26	2297.63	2220.19	2712.1	2537.71	2215.26	2570.39	3170.33	3588.66	3153.7
Reep2	28.0617	3.07113	0.626351	4.90322	9.42791e-07	6.92103e-05	60.1899	53.7036	69.9777	15.9872	33.7341	64.4398	18.8111	8.23189	14.6447	13.6469	25.8917	19.9164	10.9604	7.53753	3.25284
Fez1	3444.62	2.47386	0.504786	4.90081	9.54423e-07	6.94132e-05	4317.37	4442.97	6457.22	3719.01	6286.54	3605.47	4174.81	1679.79	3495.51	2100.42	4956.01	3694.42	419.063	557.19	1763.59
Spint1	62.4437	3.72728	0.760713	4.89972	9.59738e-07	6.94132e-05	70.1245	44.3278	19.0229	231.626	139.559	147.931	65.8493	47.4637	20.9719	40.2141	69.342	29.7497	6.08679	0	4.3872
Tmem179	13.5612	6.94231	1.41673	4.90024	9.57184e-07	6.94132e-05	20.4034	18.9542	31.9898	19.7489	8.43353	34.6983	17.766	17.4928	3.66118	3.8991	13.4253	12.9457	0	0	0
Rragd	220.603	2.79932	0.571456	4.89857	9.65381e-07	6.9479e-05	177.717	314.392	508.134	554.108	300.549	328.853	314.842	47.4319	182.894	145.543	102.196	189.796	60.2446	35.6758	46.6654
Rspo3	280.598	-2.95479	0.605176	-4.88253	1.04734e-06	7.50103e-05	132.622	65.2868	115.963	59.2466	72.1535	89.2243	60.6135	402.334	100.682	331.424	179.324	166.302	1135.9	933.577	364.319
Tmem129	958.18	-0.656603	0.134567	-4.87937	1.06426e-06	7.58518e-05	750.302	841.779	748.869	884.598	891.621	942.785	797.217	1044.66	1011.5	993.494	842.48	933.535	1161.21	1327.27	1201.37
Mid2	348.886	-2.53025	0.518709	-4.87798	1.07175e-06	7.60167e-05	109.268	191.203	187.626	95.0322	177.471	125.297	105.485	106.443	368.665	506.278	146.022	294.945	1107.18	961.634	750.747
[truncated: 21,694 more rows]

## Sheet: DE_G12RvsWT_results
Gene	baseMean	log2FoldChange	lfcSE	stat	pvalue	padj	G12C_A	G12C_B	G12C_C	G12D_A	G12D_B	G12D_C	G12R_A	G12R_B	G12R_C	G13D_A	G13D_B	G13D_C	WT_A	WT_B	WT_C
[truncated: 21,901 more rows]

[truncated: 4 more sheets: DE_G13DvsWT_results, DE_G12CvsG12D_results, DE_G12RvsG12D_results, DE_G13DvsG12D_results]
