# Supplementary material for: An In Vivo Kras Allelic Series Reveals Distinct Phenotypes of Common Oncogenic Variants
Source: Oxford University Press journal article supplement (doi:10.1158/2159-8290.cd-20-0442), 2020-08-12
Supplement: 21598290cd200442-sup-240834_2_supp_6404219_qd0276.xlsx [file 21598290cd200442-sup-240834_2_supp_6404219_qd0276.xlsx]

## Sheet: DE_G12DvsWT_results
Gene	baseMean	log2FoldChange	lfcSE	stat	pvalue	padj	MZH320	MZH365	MZH380	MZH381	MZH383	MZH406	MZH416	MZH423	MZH424	MZH446	MZH454	MZH469	MZH470	MZH472	MZH516	MZH518
							G13D	G13D	G12D	G12D	WT	G12R	WT	G12D	G12D	G12C	G13D	G12R	WT	G12R	G12C	G12C
Gkn3	3450.56	7.97373	0.477624	16.6946	1.4352e-62	2.26173e-58	1004.36	4153.07	6947.87	5648.25	36.8926	2363.35	14.9766	8395	3446.3	3997.32	3082.15	3336.68	21.2624	2956.91	4039.84	5764.75
Lyz2	16531.1	4.26947	0.26979	15.8252	2.08662e-56	1.64415e-52	7532.15	12962.1	26341.4	30747.9	1952.67	23856.2	970.984	26690.8	22548.8	27053.3	10611.8	20723.7	1211.96	20020.4	16640.5	14632.8
Cilp	2661.89	5.79382	0.381472	15.1881	4.24258e-52	2.22863e-48	1308.22	3534.55	3492.3	3940.37	65.876	2388.97	59.9032	4904.52	5003.05	6260.89	1909.53	2064.17	108.964	2274.93	2597.47	2676.54
Csf2rb	537.162	4.90568	0.324593	15.1133	1.32266e-51	5.21094e-48	314.766	511.342	745.976	858.369	34.2574	722.408	14.9766	1039.38	785.331	689.192	416.475	735.357	37.2092	684.192	504.157	501.204
Ctss	3187.88	4.42301	0.293892	15.0498	3.46316e-51	1.09152e-47	1766.25	2486.79	4709.94	5527.04	308.316	3679.06	177.223	5890.34	4132.3	6217.29	2193	4489.02	223.255	3535.68	3139.45	2531.17
Scara3	2592.28	2.36382	0.161117	14.6715	9.8193e-49	2.57904e-45	2372.43	2811.96	3024.89	3281.76	658.796	3051.26	571.607	3558.09	3461.04	3798.62	1951.63	3287.38	712.291	3048.89	3034	2851.83
Trf	5733.53	4.56179	0.321538	14.1874	1.09672e-45	2.46902e-42	2646.43	4968.5	7260.93	7436.33	536.247	6357.68	380.057	15629.5	7423.84	8177.59	4485.2	8287.37	288.905	6409.08	5393.82	6054.99
Cldn2	1867.39	7.13404	0.516261	13.8187	1.96675e-43	3.87425e-40	1527.83	1656.02	2254.4	3001.36	15.4252	1210.52	2.43518	4529.56	2368.14	4946.74	1171.6	1893.8	53.0713	1286.59	1878.31	2082.47
Lgmn	2059.65	3.12697	0.230943	13.54	9.0787e-42	1.58968e-38	1372.37	2298.15	2727.06	2586.56	314.419	2222.97	335.683	3549.41	2589.75	2794.03	1851.35	3450.17	333.242	2574.14	2045.81	1909.33
Fcgr3	1157.74	3.85959	0.286546	13.4694	2.36921e-41	3.73365e-38	666.111	879.905	1587.56	1903.81	185.471	1290.72	79.9272	2336.34	1480.24	1824.61	816.378	1701.81	111.598	1474.52	1147.57	1037.33
Psap	11956.3	2.13432	0.159265	13.4011	5.95925e-41	8.53744e-38	9100.98	11515.3	16022.7	18433.6	3974.86	14767.7	3138.36	18429.8	14602.1	14069.8	10929.4	15323.8	4417.4	14889.3	10779.2	10905.9
Golm1	1277.14	4.32982	0.323721	13.3751	8.44863e-41	1.10952e-37	966.544	1439.68	1813.48	2293.11	134.394	711.567	84.8675	3262.98	1633.52	2656.9	1011.02	907.498	116.943	781.343	1308.17	1312.29
Lbp	2081.79	5.36526	0.407981	13.1507	1.68509e-39	2.04272e-36	2930	1938.61	3608.29	3848.3	127.527	1829.58	30.216	3384.05	3083.78	3757.78	1107.69	2410.02	97.741	1657.87	1714.7	1782.42
Ctse	2928.71	7.73358	0.600464	12.8793	5.88364e-38	6.62288e-35	4703.4	3182.05	3905.17	5237.55	11.8508	928.539	11.9273	9691	3162.24	7791.22	1583.63	1590.78	53.3398	997.259	1971.34	2038.12
Slit3	1870.5	2.77955	0.215931	12.8724	6.43829e-38	6.76406e-35	2476.44	2941.43	2320.32	2619.77	312.484	1801.38	316.405	1836.45	2865.36	2425.94	1731.69	1913.48	423.844	1939.78	1953.71	2049.43
Laptm5	1777.62	3.56593	0.277154	12.8663	6.9701e-38	6.86512e-35	734.48	1910.06	2665.1	2818.77	289.717	2614.81	188.668	2716.17	2414.27	2226.97	1512.49	2234.29	195.3	2616.67	1693.45	1610.7
Fcgr2b	1955.72	4.31928	0.342364	12.6161	1.72209e-36	1.59638e-33	778.18	1433.81	2989.42	3622.8	250.3	2209.01	67.559	3458.41	2866.17	2903.48	1320.55	3376.56	169.597	2237.94	1794.56	1813.19
Ccl6	3789.37	4.75334	0.377134	12.6039	2.01045e-36	1.76015e-33	1540.71	2407.63	5956.3	6782.31	418.774	4924.74	94.0562	7572.18	5472.1	5420.81	3063.03	6219.32	206.283	4309.92	3473.75	2768
Mpeg1	2170.75	4.18599	0.335086	12.4923	8.22622e-36	6.823e-33	1111.14	2143.93	2788.98	2861.23	189.733	2756.58	112.325	2404.13	2687.35	5271.67	1699.62	3565.65	140.864	2765.71	2379.09	1853.92
Sh3pxd2b	1088.51	3.48256	0.28119	12.3851	3.14769e-35	2.48023e-32	742.906	1234.49	1541.27	1823.42	231.004	1054.8	79.1799	1865.65	1423.45	1703.81	910.396	1064.44	137.628	1153	1220.99	1229.77
Itgam	1193.88	3.78906	0.30664	12.3567	4.48186e-35	3.36332e-32	706.267	1131.23	1633.62	1569.18	173.834	1948.97	53.3393	1395.38	1679.32	1828.35	960.074	2144.44	116.059	1561.01	1132.53	1068.45
Cfi	1047.53	4.33884	0.355358	12.2098	2.75582e-34	1.97404e-31	429.328	1154.94	1776.13	1877.53	105.407	1124.51	79.8753	1269.63	1085.65	1760.69	744.803	1403.86	37.2092	1184.42	1366.66	1359.9
Sox4	1111.39	2.42736	0.199696	12.1553	5.37809e-34	3.68492e-31	845.309	1344.48	1371.72	1273.95	223.991	1241.79	237.13	1369.62	1272.67	2018.68	990.31	1126.43	276.411	1241.26	1624.51	1323.97
Slc26a9	694.081	5.42019	0.446194	12.1476	5.90718e-34	3.87881e-31	1680.42	964.549	586.175	586.018	2.47638	637.453	30.4939	647.134	870.401	730.182	820.547	859.412	13.0952	989.404	853.963	833.578
Onecut2	992.147	6.10138	0.503326	12.1221	8.06347e-34	5.08289e-31	952.09	818.825	1262.43	1697.78	28.9871	341.002	17.4728	1642.54	1344.85	4178.82	427.125	534.808	18.6047	372.07	1138.48	1098.47
Csf2rb2	394.386	5.32222	0.44185	12.0453	2.05307e-33	1.2444e-30	196.868	442.264	620.28	638.211	21.0815	408.018	7.48831	703.187	536.229	690.233	322.413	448.735	18.6046	455.784	342.695	458.09
Olfml3	1989.87	4.90305	0.407255	12.0392	2.20977e-33	1.28977e-30	740.478	2537.42	2951.11	3755.7	155.052	1468.62	69.6629	5035.8	2957.27	4020.67	1439.7	1585.29	144.28	1421.54	1628.59	1926.74
Ear2	683.33	5.67318	0.471795	12.0247	2.63634e-33	1.48379e-30	193.531	249.353	1318.89	1745.6	44.7981	1474.38	9.98441	615.626	931.999	614.812	388.079	1176.57	13.289	788.578	787.539	580.247
Tnfrsf1b	507.052	3.05003	0.2551	11.9563	6.02204e-33	3.27246e-30	370.379	577.049	658.536	752.001	115.948	556.836	67.3948	801.017	687.553	727.163	449.012	602.492	79.7341	703.829	486.034	477.851
Mmp14	1654.2	3.50908	0.298315	11.763	6.05446e-32	3.18041e-29	1507.1	2282.08	2045.74	2766.41	289.87	1382.73	167.239	4168.31	2022.3	2208.54	1205.65	1197.46	268.438	1405.59	1591.55	1958.11
Tgfbr2	2753.72	2.50944	0.213826	11.7359	8.34481e-32	4.24213e-29	2150.01	3613.77	3678.39	4181.15	737.196	2574.35	560.802	3681.48	4052.24	4432.49	2814.58	2479.85	755.453	2728.42	3000.4	2618.96
Lgals3	370.088	4.14869	0.35561	11.6664	1.89234e-31	9.31917e-29	379.03	306.597	417.237	509.317	32.5517	563.716	23.1253	724.309	420.185	511.464	346.866	616.761	32.8311	457.478	315.504	264.441
F5	523.562	4.76656	0.409306	11.6455	2.41954e-31	1.15544e-28	295.858	555.147	962.755	1132.12	26.3518	345.928	14.9766	697.782	618.487	1216.1	307.623	418.652	53.156	251.146	678.799	802.106
Cyp1b1	1507.01	4.37306	0.379004	11.5383	8.45993e-31	3.92118e-28	543.89	1758.95	2091.28	2424.21	137.029	1941.53	57.4104	1681.49	1880.29	2885.24	1518	2247.85	98.3387	1737.35	1554.48	1554.81
Ccr2	1528.86	4.72133	0.409323	11.5345	8.84215e-31	3.98124e-28	298.813	1156.34	2066.58	2434.02	98.6861	2658.77	74.5275	1779.81	2124.28	3333.68	898.559	2501.02	65.0277	1991.95	1781.87	1197.78
Cd44	1726.54	4.23835	0.368593	11.4987	1.33856e-30	5.85956e-28	634.624	1436.85	2470.17	3243.57	165.037	1411.25	162.717	3652.85	2282.53	4694.66	1051.53	1607.58	135.371	1479.88	1578.6	1617.4
Synpo	800.788	2.64467	0.230544	11.4714	1.83606e-30	7.82015e-28	692.688	713.44	1065.44	1365.38	237.303	694.722	137.822	1404.78	1030.5	1147.72	788.114	941.381	210.244	792.365	869.28	721.443
Syk	566.374	3.03033	0.264663	11.4498	2.35795e-30	9.77867e-28	299.072	555.297	796.596	898.593	119.824	819.222	65.2693	729.533	754.92	801.928	497.669	749.816	108.107	762.941	565.6	537.604
Zim1	1069.57	4.51361	0.395484	11.4129	3.60618e-30	1.45718e-27	797.72	1927.33	1159.98	2155.23	100.861	425.763	43.715	1202.36	1906.57	1559.52	636.128	670.269	67.493	702.858	1930.06	1827.3
C3	24493.9	3.68178	0.32433	11.352	7.25081e-30	2.85664e-27	9608.94	34135.5	32904.8	34028.6	3263.84	26864.7	2058.18	28019.2	36129.1	38621.7	21082.5	38763.6	2340.3	32999.4	26754	24328
Jtb	836.419	-1.62981	0.144528	-11.2768	1.70918e-29	6.56951e-27	792.153	607.352	617.616	527.796	1851.3	698.921	1624.13	499.2	579.436	508.54	790.962	675.935	1682.12	667.317	661.983	597.952
Serping1	5749.15	2.86531	0.254275	11.2686	1.87605e-29	7.0392e-27	3608.52	7444.59	8229.62	9367.83	1551.12	5179.09	940.679	9180.98	8262.75	9230.97	5121.54	5694.64	1115.27	5820.97	5514.34	5723.44
Itga2	566.908	5.18377	0.460226	11.2636	1.98588e-29	7.27802e-27	656.227	409.41	622.102	765.194	26.3518	831.804	27.4571	1138.83	733.338	1108.43	279.227	945.101	13.289	550.868	476.972	485.935
Muc6	1112.89	6.60275	0.589565	11.1994	4.1069e-29	1.47092e-26	1057.79	687.21	2064.21	1799.55	37.8505	129.11	11.9509	3271.45	948.173	1376.62	388.902	83.5098	12.7251	251.455	1345.05	4340.66
Hp	519.42	7.44492	0.671616	11.0851	1.48211e-28	5.19036e-26	368.154	470.064	729.581	907.019	5.27037	765.773	0	1432.32	557.181	364.102	370.331	1064.6	10.6312	777.209	180.409	308.088
Lox	1300.62	3.50684	0.316758	11.071	1.73365e-28	5.93926e-26	1264.83	1464.46	1625.22	1575.69	209.242	1184.77	163.035	2559.34	2080.41	2568.56	779.028	1560.28	145.189	1126.08	1381.8	1122.03
Thbs2	967.312	4.07574	0.368581	11.0579	2.00683e-28	6.72887e-26	501.624	1272.88	1367.17	1872.58	131.759	588.374	87.3636	1670.14	1390.63	2280.84	610.514	697.754	61.1294	764.807	1029.73	1149.72
Capg	612.788	3.06376	0.277315	11.048	2.24238e-28	7.362e-26	497.116	715.514	770.094	848.33	102.694	848.157	111.673	1498.29	679.139	557.902	591.703	714	126.348	680.488	531.85	531.306
Extl1	110.586	-4.07457	0.370529	-10.9966	3.96671e-28	1.27574e-25	88.8439	83.5625	37.0749	16.7443	275.038	60.1284	339.037	14.3365	24.9426	20.9937	79.4444	37.6454	539.102	65.2282	39.2965	47.951
Notch2	909.224	1.92166	0.175471	10.9514	6.54006e-28	2.0613e-25	925.391	1069.86	1030.16	1209.63	271.424	1093.96	284.556	892.361	1261.81	1233.26	792.13	1077.13	313.621	1050.06	1017.38	1024.86
Tspan8	691.919	5.29712	0.485715	10.9058	1.08134e-27	3.34134e-25	1148.82	794.141	786.707	1023.4	38.9259	346.6	8.46079	1857.53	775.266	1634.84	590.277	434.825	38.9444	339.222	651.67	601.076
Runx1	356.837	4.53616	0.416416	10.8933	1.24022e-27	3.75859e-25	281.954	376.028	485.176	563.328	28.3213	316.379	14.6972	718.334	498.463	799.095	263.863	393.004	31.006	288.626	307.263	343.853
Igf2	1586.72	4.24889	0.392012	10.8387	2.25774e-27	6.71314e-25	467.734	1216.14	2064.57	3481.33	190.769	426.865	117.94	3629.73	4020.52	3358.02	629.787	702.368	209.301	1058.56	1560.01	2253.83
Cerk	429.174	2.33004	0.215688	10.8028	3.33683e-27	9.73799e-25	287.095	421.665	546.465	678.778	129.606	450.342	121.894	686.258	615.809	552.465	382.783	515.919	125.155	551.574	410.906	390.07
Cp	3952.49	1.94858	0.181608	10.7296	7.39175e-27	2.11794e-24	2376.16	3236.68	4206.17	4704.59	1332.71	5461.78	1195.55	4323.36	5011.61	5904.27	2605.76	7517.61	1020.24	5471.7	4251.25	4620.4
Cfh	3042.83	3.20423	0.299841	10.6864	1.1784e-26	3.31613e-24	2176.15	3668.04	4054.12	5254.89	532.69	2607.22	458.035	3654.11	4843.92	7015.53	2177.2	3059.13	458.336	2847.08	3108.87	2769.94
Fxyd5	690.224	3.06729	0.288872	10.6182	2.45337e-26	6.78293e-24	413.498	625.874	856.026	1025.33	146.571	772.029	104.446	1368.25	889.47	1125.96	493.325	1025.51	120.291	870.032	639.923	567.054
Ccl9	1911.94	4.40885	0.418231	10.5417	5.55015e-26	1.50801e-23	643.99	1106.81	3098.5	3495.9	283.972	2318.53	68.0354	2920.09	2681.65	2978.94	1660.24	3398.19	86.6488	2286.33	2169.55	1393.64
Serpina3n	1125.2	3.80906	0.36171	10.5307	6.23755e-26	1.66606e-23	1523.78	832.299	2303.51	2241.16	216.085	846.588	147.27	2166.31	1373.55	1421.04	1510.31	1083.82	69.1029	602.544	949.001	716.776
Wfdc17	395.574	5.00159	0.475477	10.5191	7.05475e-26	1.85293e-23	119.011	349.599	604.796	627.492	13.1759	445.469	22.4649	710.754	491.22	758.892	309.398	691.069	21.2624	468.186	384.708	311.681
Elf4	593.25	2.4109	0.230356	10.466	1.23816e-25	3.19872e-23	418.815	546.119	705.165	858.64	179.018	582.484	123.544	797.831	804.325	1022.2	495.23	721.762	144.444	777.285	739.813	575.324
Krt7	1527.62	4.37344	0.419513	10.425	1.90602e-25	4.76778e-23	3128.68	1996.39	1771.01	1800.76	156.878	998.13	106.066	5586.05	1734.48	1762.38	1452.48	788.006	130.709	1098.61	1000.76	930.608
Naip2	339.905	2.25706	0.216501	10.4252	1.90261e-25	4.76778e-23	341.05	411.125	394.502	448.587	81.2531	389.53	85.1714	417.161	412.134	516.792	333.056	386.482	96.0236	397.266	391.224	337.129
Ephb2	472.982	3.43543	0.330605	10.3914	2.71445e-25	6.58529e-23	399.614	719.592	646.781	854.642	64.2328	271.52	40.9593	736.553	682.932	805.519	506.328	300.295	102.077	390.839	558.017	487.806
Tmem173	606.857	3.35117	0.322498	10.3913	2.71619e-25	6.58529e-23	279.174	799.445	661.268	706.65	76.4203	703.683	69.8909	1067.48	780.675	902.972	586.851	771.29	90.3653	782.377	742.231	688.931
Zeb2	1074.19	3.05475	0.29506	10.353	4.05675e-25	9.6864e-23	620.847	1140.03	1634.91	2178.71	287.188	1212.45	211.005	1244.41	1798.42	1466.16	779.344	1346.33	120.459	1082.71	950.647	1113.35
Srp9	1517.8	-1.95292	0.188872	-10.3399	4.64958e-25	1.09362e-22	1550.07	881.355	951.696	1007.08	3779.42	1043.41	3345.85	793.038	833.912	937.104	1174.14	1279.16	3282.11	1072.22	1133.43	1220.81
Nckap1l	741.516	3.50323	0.339612	10.3154	6.00354e-25	1.39132e-22	223.562	693.302	1012.85	1259.93	97.5018	816.036	82.3714	1152.88	977.784	1228.58	493.38	1126.43	111.628	1143.08	729.05	715.878
Emb	490.236	2.93445	0.284673	10.3081	6.47355e-25	1.4785e-22	352.583	368.975	676.752	902.896	105.407	508.544	59.9065	789.126	689.105	642.899	309.99	868.223	135.548	531.231	498.39	404.197
Man2b1	1989.19	1.40279	0.136288	10.2928	7.59236e-25	1.70381e-22	1903.06	2003.25	2390.04	2821.65	830.083	2339.7	1030.89	2864.64	2315.64	2134.68	1913.18	2002.18	1087.04	2384.34	1888.94	1917.69
Tnc	1048.58	6.09526	0.592247	10.2918	7.67629e-25	1.70381e-22	129.335	925.72	1614.53	1981.38	59.4378	537.677	9.84046	4461.45	1683.55	2050.82	446.438	622.385	38.1487	423.847	898.21	894.571
P2rx7	333.47	3.0917	0.30057	10.2861	8.13838e-25	1.78129e-22	224.113	354.032	496.617	515.948	96.6082	340.038	53.0484	486.345	545.183	448.835	192.321	412.854	33.7292	441.974	369.025	324.85
Slc43a2	513.481	2.16711	0.211181	10.2618	1.04699e-24	2.26021e-22	491.076	431.034	645.608	717.026	159.125	563.7	154.53	770.406	926.284	517.777	376.084	749.778	195.416	486.16	507.968	523.732
Naaa	635.173	3.71809	0.362789	10.2486	1.20049e-24	2.55655e-22	203.026	502.274	982.829	1417.1	107.062	894.458	69.3493	897.893	957.552	967.759	507.982	594.407	66.0742	861.997	686.189	446.827
Plekho2	468.531	2.73022	0.266456	10.2464	1.22807e-24	2.58041e-22	306.981	629.279	641.23	660.474	102.772	663.275	114.821	768.047	679.792	571.639	431.856	441.214	93.0231	531.231	433.311	427.551
Cldn4	574.206	5.13563	0.502962	10.2108	1.77436e-24	3.67923e-22	808.605	536.614	735.957	689.334	23.7166	706.64	29.9532	2441.97	636.335	591.405	366.782	416.981	42.5248	448.549	322.1	389.825
Aebp1	1788.94	2.60827	0.256491	10.1691	2.72467e-24	5.57637e-22	1314.19	2817.54	2247.95	2851.61	533.927	1594.76	415.683	3528.12	2424.19	2148.93	1747.87	1494.81	409.415	1873.55	1639.84	1580.65
Mafb	258.734	3.14356	0.309408	10.1599	2.99372e-24	5.97189e-22	226.899	363.078	276.895	327.351	47.4333	272.997	37.4415	456.18	312.736	380.746	305.257	241.498	31.8936	276.984	304.801	277.549
Mat1a	502.623	-3.97652	0.391371	-10.1605	2.97588e-24	5.97189e-22	275.838	212.287	63.7586	169.035	1444.08	254.272	2029.33	75.6696	158.308	79.0621	284.552	252.361	2033.22	191.202	250.431	268.566
4632428N05Rik	734.716	2.95717	0.291649	10.1395	3.69093e-24	7.18092e-22	406.757	761.184	1106.51	1130.61	191.23	994.217	93.953	1355.08	965.66	885.459	782.035	784.108	158.69	1022.26	571.95	545.741
Pirb	773.18	4.00297	0.394747	10.1406	3.64863e-24	7.18092e-22	211.972	771.294	1105.97	1154.79	93.2477	1093.96	53.3052	1084.12	986.464	1351.75	644.514	1308.94	57.0312	1115.42	747.616	590.484
Sla	439.416	3.92574	0.396003	9.91339	3.64067e-23	6.99674e-21	221.02	272.59	741.549	993.203	69.8255	324.406	29.4078	607.098	622.5	754.74	355.291	664.833	43.6897	618.287	375.032	337.19
Mmp2	3157.42	2.79037	0.281984	9.8955	4.35435e-23	8.26749e-21	3036.44	4030.08	4304.62	6101.76	953.936	2327.87	489.236	6274.63	4369.76	4667.78	2145.08	2491.86	839.865	2835.99	2644.35	3005.43
Ctsk	573.944	3.29917	0.334703	9.85702	6.3918e-23	1.18698e-20	400.41	592.213	796.983	1187.37	110.678	350.856	82.3714	1069.64	836.548	1162	328.92	618.369	103.654	442.348	542.051	558.69
Rpl22l1	2036.54	-1.29634	0.131517	-9.85686	6.40225e-23	1.18698e-20	1714.68	1377.58	1679.7	1451.21	4269.61	1677.05	3740.48	1461.6	1617.2	1552.23	1764.58	1837.8	3425.73	1570.87	1788.35	1655.9
Cotl1	883.252	3.6233	0.368038	9.84491	7.21039e-23	1.32126e-20	337.777	908.862	1181.96	1302.29	128.991	1386.22	84.7799	2256.41	1024.84	853.197	1005.24	851.466	137.636	1189.39	719.383	763.592
Sfrp1	1296.23	3.79454	0.385756	9.83662	7.82955e-23	1.41823e-20	692.931	2069.8	2103.12	1734.05	155.476	800.267	122.309	2565.74	2026.19	2889.41	1148.26	1184.93	178.073	806.148	1028.91	1234.15
Sprr2a2	383.785	10.486	1.07102	9.79074	1.2339e-22	2.20967e-20	111.775	258.011	697.993	555.952	0	202.056	0.611685	1872.86	288.53	736.191	169.356	101.33	0.65131	267.448	472.239	405.559
Olfml2b	519.174	2.70763	0.277476	9.75805	1.70397e-22	3.01717e-20	412.644	737.107	701.345	743.755	139.665	429.7	72.387	988.029	678.24	605.969	469.717	413.639	146.179	584.974	640.905	542.522
Olfm1	376.856	2.97527	0.305307	9.74518	1.93429e-22	3.38694e-20	152.004	317.549	579.919	652.859	93.3204	564.663	54.3043	672.184	436.561	480.72	290.815	442.952	76.3476	448.263	430.542	336.693
Gm2a	1273.33	2.20786	0.226646	9.74149	2.00601e-22	3.47392e-20	661.788	1210.54	1913.67	2281.56	476.968	1745.41	354.447	1853.37	1493.84	1600.49	1029.95	1403.03	393.355	1478.97	1288.4	1187.44
Pla2g7	610.003	3.71371	0.381477	9.73509	2.13624e-22	3.65924e-20	604.706	479.441	868.303	1025.48	114.599	969.854	21.7084	760.657	832.613	1038.45	475.466	768.095	69.3441	693.83	559.736	477.765
Fn1	23941.6	3.35298	0.344784	9.72487	2.36211e-22	4.00264e-20	7832.82	21938.4	32898.1	40673.2	4499.96	30942.6	2243.58	50686.5	37496.1	39104	16304.3	28072.5	5130.25	21037.8	22795.6	21409.5
Ccr1	321.202	4.51142	0.463979	9.72332	2.39831e-22	4.02075e-20	94.5411	315.061	404.412	413.93	21.0815	383.379	19.9688	525.363	390.337	669.947	236.042	523.942	15.9468	420.644	402.831	301.8
Rin2	745.282	2.16153	0.222584	9.71107	2.70473e-22	4.48672e-20	637.748	850.579	936.345	1027.81	259.111	752.574	217.796	1073.63	1112.4	1089.32	798.231	824.57	217.758	878.129	678.854	569.658
Marcksl1	483.173	3.59362	0.370228	9.70651	2.82856e-22	4.64326e-20	263.603	654.551	520.999	631.615	63.2444	498.688	54.9143	1193.96	578.134	774.496	476.816	477.147	63.7872	490.923	448.963	538.929
B4galt6	1222.23	2.31372	0.238513	9.70062	2.99673e-22	4.8686e-20	1430.35	1107.77	1401.78	1639.23	287.235	1060.45	302.028	1718.24	1523.32	2450.92	931.152	1424.76	358.803	1183.38	1388.08	1348.22
Frem1	348.98	3.8095	0.393562	9.67954	3.68369e-22	5.92359e-20	144.283	349.175	429.851	638.477	52.6289	382.523	43.6918	604.223	571.96	589.497	206.149	580.462	23.7548	271.848	295.983	399.172
Cftr	829.095	4.61281	0.478418	9.6418	5.32486e-22	8.4762e-20	211.587	725.101	1009.58	1591.98	57.4407	557.961	54.4091	1581.76	756.235	2976.33	394.386	842.335	39.5003	560.506	957.727	948.689
Pnlip	509414	-8.70626	0.90729	-9.5959	8.31845e-22	1.3109e-19	15658.2	16239.1	15129.9	7162.15	2.4709e+06	89649.6	2.45469e+06	404.832	2282.27	820.269	85254.2	26548.9	2.8994e+06	42278.3	11191.1	13016.9
Fcer1g	638.354	3.65614	0.381092	9.59384	8.48666e-22	1.32417e-19	194.885	656.686	787.876	914.728	99.3962	746.833	69.6621	1413.68	880.491	1063.39	442.796	925.128	68.8767	804.444	549.074	595.716
Apoe	7449.88	3.13698	0.328795	9.54086	1.41657e-21	2.1886e-19	6996.72	11272.9	8811.88	8684.51	1226.64	10854.2	803.315	17126.1	7174.4	6504.44	12317.9	5325.02	1535.24	8525.46	5490.87	6548.46
Gal	253.321	-5.86406	0.615321	-9.53007	1.57179e-21	2.38651e-19	16.6837	62.3382	23.6818	23.0877	1357.12	99.5406	975.976	11.3504	20.9525	6.24174	119.5	32.5897	1102.99	96.1176	41.1893	63.7733
Lamc2	1189.1	3.91059	0.410351	9.52986	1.57495e-21	2.38651e-19	2624.79	1241.6	1381.13	1591.18	153.9	954.05	113.89	2837.77	1569.65	1568.66	774.337	1521.14	103.097	1037.87	658.82	893.704
Rassf2	620.47	2.32953	0.244713	9.51947	1.74061e-21	2.61241e-19	387.393	634.921	727.058	792.485	183.165	711.085	107.306	637.387	736.693	915.331	706.493	873.891	135.673	888.715	672.557	817.36
Clca1	267.806	2.93823	0.308853	9.51338	1.84572e-21	2.74402e-19	153.944	183.935	329.801	305.455	50.3785	309.82	45.2081	348.629	456.863	493.086	172.345	444.732	45.4624	311.29	374.832	259.112
Cox7b	1281.63	-1.23561	0.130127	-9.49539	2.19391e-21	3.2312e-19	1015.34	876.718	992.403	942.586	2547.96	1120.06	2336.2	1105.4	944.651	890.878	1148.54	1150.27	2158.41	1154.63	1025.5	1096.46
Vcl	1154.67	1.67808	0.177012	9.48001	2.54247e-21	3.70988e-19	1128.93	1192.01	1493.77	1639.23	511.225	1100.86	419.345	1561.5	1517.89	1804.9	1083.78	1113.06	526.245	1120.34	1103.87	1157.8
Alox5ap	226.727	3.8601	0.407544	9.4716	2.75581e-21	3.9843e-19	125.684	192.069	315.15	378.474	47.4333	338.044	7.48831	488.069	332.912	274.637	233.675	205.566	23.9202	267.682	230.66	166.17
H6pd	1658.26	2.02216	0.213738	9.46091	3.05286e-21	4.37364e-19	2659.07	1923.53	1993.83	2321.13	606.132	1531.09	593.604	2900.16	2227.16	1918.8	1472.96	1510.22	543.984	1579.43	1305.75	1445.31
Fam115a	433.048	1.93051	0.204093	9.459	3.10891e-21	4.41381e-19	321.113	400.327	521.976	543.482	182.913	349.915	118.215	596.535	676.653	659.125	359.19	407.026	161.92	483.582	631.125	515.675
Vtcn1	221.428	3.55734	0.377077	9.43398	3.94823e-21	5.55537e-19	229.123	232.505	230.442	271.281	36.8926	225.691	17.4727	376.186	262.294	414.036	189.898	319.212	18.6046	220.14	232.308	266.77
Tbc1d2b	1442.69	1.85109	0.19637	9.42657	4.23718e-21	5.90918e-19	1382.89	1565	1654.03	2034.44	506.411	1393.29	523.808	1760.75	2113.69	2361.42	1162.79	1507.39	541.936	1642.67	1448.8	1483.77
Rab31	758.65	3.10407	0.329483	9.42104	4.46645e-21	6.17428e-19	527.206	712.677	935.43	1311.05	173.922	746.062	109.829	1426.37	1129.88	1652.5	443.096	831.455	135.548	679.024	711.751	612.583
Axl	1710.56	1.72782	0.183423	9.41987	4.51629e-21	6.18889e-19	2002.59	1861.98	2051.87	2170.25	790.476	1468.36	615.333	2626.53	2493.98	2504.02	1516.61	1542.45	707.365	1525.8	1942.24	1549.11
Rac2	392.338	3.94663	0.419186	9.41497	4.73228e-21	6.37401e-19	132.358	464.167	519.177	584.615	31.6222	621.882	17.4727	691.836	513.724	517.544	344.301	440.379	63.7872	591.175	341.871	401.502
Rps27l	1896.22	-1.6583	0.176125	-9.4155	4.70845e-21	6.37401e-19	1361.88	1251.11	1478.88	1321.04	4602.47	1519.47	4080.28	1067.86	1381.47	946.238	1629.23	1600.75	3738.06	1523.51	1382.07	1455.18
Osmr	895.028	2.2496	0.239068	9.40986	4.96811e-21	6.63495e-19	893.728	1026.19	1048.88	1224.19	279.057	782.79	234.502	874.84	1163.56	1649.07	854.177	1160.14	169.474	848.328	1059.29	1052.23
Cd53	658.439	3.41976	0.363623	9.40469	5.21858e-21	6.91089e-19	219.113	527.347	942.717	1041.42	113.313	825.891	59.9065	873.984	897.854	1310.77	482.14	1179.91	90.3653	773.075	657.381	539.827
Gcnt3	640.559	8.83256	0.939489	9.40145	5.38139e-21	7.0671e-19	806.38	605.691	910.838	1081.83	2.63518	238.503	0	2004.7	746.53	1838.19	412.925	252.361	5.3156	233.576	475.324	634.14
Cygb	908.305	2.72886	0.291106	9.37411	6.97636e-21	9.08598e-19	944.299	1505.38	1171.34	1319.3	213.45	764.787	137.286	1928.49	1233.09	1082.42	994.451	472.969	289.7	771.008	764.473	940.432
Sec11c	2391.33	-2.3318	0.248993	-9.36492	7.61082e-21	9.83106e-19	1742.38	1417.3	1396.69	1366.14	6636.38	1874.61	6296.06	924.678	1217.88	885.405	1929.9	1532.72	5584.44	1582.99	1963.62	1910.11
Cd68	431.332	2.87796	0.308222	9.3373	9.88193e-21	1.26609e-18	214.821	441.141	482.429	485.694	82.7376	643.722	88.9285	831.871	510.551	495.4	409.756	724.429	65.7468	666.697	376.246	381.148
Capn6	408.059	3.02159	0.323662	9.33562	1.004e-20	1.27597e-18	176.923	392.483	492.843	675.84	81.7998	326.425	57.487	507.415	636.119	839.047	192.385	507.782	74.5178	344.623	640.368	582.881
Apbb1ip	282.775	2.9788	0.319596	9.32053	1.15762e-20	1.45944e-18	169.861	283.671	371.652	433.053	56.9949	382.872	45.1629	399.326	402.325	515.187	227.762	310.94	50.7602	345.904	302.033	226.894
Tnfrsf23	291.944	3.45287	0.371689	9.28968	1.54759e-20	1.93559e-18	246.921	228.381	331.384	342.97	38.5322	496.998	37.3793	612.104	353.193	369.363	146.514	650.05	36.5487	395.569	180.772	204.428
Epcam	2580.8	1.99492	0.2148	9.28736	1.58164e-20	1.9626e-18	2907.42	2558.39	2945.65	3182.81	798.46	2442.19	873.636	4903.93	2949.65	4167.92	2178.8	2523.61	959.466	2171.43	2837.12	2892.25
Gpr39	259.706	2.81342	0.303478	9.27058	1.85132e-20	2.2793e-18	251.368	358.866	317.882	318.281	15.8111	260.185	79.8753	421.047	344.552	361.501	270.354	269.91	53.156	267.682	299.858	264.974
Nat8	72.337	-4.67817	0.50471	-9.26903	1.87854e-20	2.29487e-18	40.041	29.4843	10.0192	3.29825	374.196	35.4798	167.239	11.8909	18.6245	8.32232	31.3539	27.5759	305.647	71.3131	4.94271	17.9643
Adamts2	2188.52	3.03378	0.327921	9.25157	2.21228e-20	2.6818e-18	1196.03	2605.9	2874.99	3661.51	609.682	1966.37	288.682	3905.73	3854	4298.7	1582.75	1844.52	411.581	1972.11	2066.28	1877.45
Myh9	5226.42	1.22938	0.133596	9.2022	3.50689e-20	4.21871e-18	4546.05	5973.21	6150.88	6203.62	2498.57	5979.94	2896.56	6514.92	5917.19	6445.62	6227.48	5483.83	2534.25	5547.01	5204.97	5498.69
Dkk3	591.545	3.93103	0.428596	9.17188	4.64845e-20	5.54961e-18	1136.72	692.459	756.906	1200.56	86.961	319.318	32.4493	1065.86	909.494	1144.32	344.301	388.57	74.4185	371.035	457.201	484.138
Gsta4	560.159	4.94133	0.538848	9.17017	4.72295e-20	5.59616e-18	1485.96	894.637	614.815	828.685	42.1629	166.558	14.9766	1503.12	689.105	1222.34	411.742	137.044	31.8936	188.101	335.281	396.113
H2-DMa	479.416	4.57492	0.499556	9.15797	5.28817e-20	6.21912e-18	123.164	314.399	812.49	1036.51	64.8454	1075.17	10.2372	778.069	571.287	530.113	451.28	366.705	27.1303	559.514	476.377	473.37
Cfb	2343.01	3.52326	0.385332	9.14343	6.05043e-20	7.06287e-18	703.921	2574.74	2811.63	2691.54	321.307	2727.41	270.842	4996.84	2963.41	4014.57	2323.78	3730.7	285.808	3114.08	2077.03	1880.48
Tgfbi	1342.75	3.03093	0.332751	9.10869	8.33799e-20	9.66164e-18	537.216	1229.92	1664.1	1951.74	339.939	1494.09	159.751	2784.1	1818.99	2301.64	1070.77	1759.84	255.149	1650.54	1355.13	1111.09
Clec4n	310.941	4.9541	0.54523	9.08626	1.02503e-19	1.17909e-17	52.8424	242.601	483.312	498.984	25.0099	224.023	13.1616	727.311	442.421	652.977	156.17	500.66	14.0139	330.688	284.196	326.683
Cmklr1	402.038	1.90806	0.210212	9.07682	1.1179e-19	1.27659e-17	308.513	401.116	517.129	566.904	187.703	471.744	126.135	491.461	535.078	478.156	454.177	516.085	105.175	471.138	374.933	427.165
Igfbp4	5667.86	3.07333	0.33939	9.05546	1.35989e-19	1.54176e-17	2799.05	8414.42	7352.11	8082.56	1415.07	6306.32	711.761	12450.2	7188.36	5966.27	7789.77	4333.23	999.112	6533.35	4863.78	5480.41
Gdf10	1022.77	2.37772	0.263248	9.03225	1.68174e-19	1.87962e-17	1138.94	1471.69	1496.51	1763.74	363.655	578.518	182.215	1821.48	1602.48	1405.43	949.491	507.23	419.933	686.259	857.561	1119.18
Pik3r5	194.047	2.75892	0.305426	9.03303	1.66989e-19	1.87962e-17	240.125	269.935	266.123	254.476	46.1883	191.37	26.8867	299.242	239.036	270.258	220.713	155.665	44.7686	214.176	157.922	207.861
Timp1	478.431	6.68415	0.741513	9.01421	1.98302e-19	2.20073e-17	67.0485	425.722	633.261	516.944	7.94269	343.593	2.50783	2323.35	490.409	685.294	387.524	646.504	18.692	380.047	334.373	391.683
Tmem154	182.526	3.86	0.429214	8.9932	2.40135e-19	2.64635e-17	62.0385	113.68	323.004	342.973	16.3219	238.475	22.714	240.52	337.002	273.74	102.095	311.908	28.649	197.651	174.981	134.658
Vav2	393.584	1.54391	0.17182	8.98561	2.573e-19	2.81583e-17	477.177	441.997	517.061	487.875	149.512	361.776	193.206	565.35	552.144	458.856	421.19	377.934	205.283	383.283	333.456	371.249
Mien1	603.937	-1.52093	0.169368	-8.98002	2.70718e-19	2.94224e-17	374.828	411.937	446.31	459.281	1330.77	530.226	1283	463.747	400.426	333.413	585.667	483.832	1196.01	505.393	413.54	444.617
Kcmf1	506.537	-1.44439	0.160954	-8.97394	2.86089e-19	3.088e-17	420.43	411.095	356.138	286.948	1114.68	446.454	838.69	348.08	398.874	364.102	420.024	463.777	885.048	418.577	444.844	486.833
Vcan	1686.51	3.56635	0.397757	8.96615	3.07054e-19	3.29174e-17	355.108	1377.51	1698.45	2088.76	247.454	1486.38	219.947	3908.87	3038.47	2774.59	1218.84	2727.49	212.02	1552.53	2233.47	1844.22
Fzd1	666.26	3.66822	0.409217	8.964	3.13102e-19	3.33391e-17	402.634	711.835	815.2	1137.9	89.5962	504.602	67.3948	1742.56	1031.33	1630.13	359.091	477.982	122.259	475.42	566.765	525.456
Il1rn	354.776	5.10707	0.570943	8.94497	3.72038e-19	3.93487e-17	241.97	360.796	293.039	411.726	12.9889	742.323	24.533	537.74	245.898	657.25	221.603	574.627	0	567.565	503.887	280.468
Gpr124	510.213	2.86584	0.320985	8.92828	4.32688e-19	4.54582e-17	236.832	642.109	647.099	757.31	138.245	433.851	99.0179	1069.37	859.757	681.062	492.522	424.652	103.89	573.005	476.232	528.456
Slfn2	401.73	3.17137	0.355317	8.92547	4.43827e-19	4.63197e-17	214.664	411.937	403.501	535.141	57.974	430.685	42.4337	637.787	454.747	635.617	418.841	789.674	69.1029	588.074	416.836	320.663
Pros1	1486.46	2.64	0.296079	8.91655	4.81043e-19	4.98734e-17	723.142	1365.31	2006.38	2604.48	498.646	1338.92	311.827	2184.52	2394.67	3136.99	990.266	1515.61	296.597	1469.28	1486.87	1459.88
Tm4sf4	959.957	2.24853	0.252281	8.91281	4.97571e-19	5.12498e-17	857.544	1268.67	929.965	940.826	245.072	1257.56	182.215	1628.52	918.806	1384.63	957.182	1067.1	271.096	1250.56	995.957	1203.61
Tcea3	370.73	-2.39809	0.269506	-8.89809	5.68168e-19	5.81413e-17	403.476	289.339	209.607	146.518	748.048	360.296	914.292	187.049	135.632	143.418	345.729	196.928	1021.32	356.76	212.371	260.898
Il4ra	306.727	4.11501	0.464792	8.85346	8.48501e-19	8.62679e-17	187.97	374.029	390.749	344.667	42.1629	316.362	7.48831	726.428	348.432	598.687	311.173	368.514	29.2358	301.789	254.55	305.393
Cd9	1248.56	1.43342	0.162084	8.84368	9.26159e-19	9.35599e-17	1401.84	1515.47	1370.58	1470.52	571.506	1146.44	586.908	1819.67	1512.76	1701.58	1091.53	1268.25	556.913	1258.51	1356.99	1347.44
Il1r1	836.744	2.16672	0.245042	8.84224	9.38196e-19	9.41722e-17	649.103	797.826	1021.04	1202.41	269.805	906.827	140.222	1096.66	947.46	1566.83	724.195	898.946	307.924	882.718	1072.83	903.103
Spink3	12943.4	-3.11737	0.354155	-8.80229	1.34053e-18	1.33705e-16	5022.91	8226.96	6227.4	4681.87	41572.6	9866.34	38816.9	3277.58	3878.54	2183.05	10363.4	10629.3	37182.6	10020	7083.73	8060.59
S100a4	269.083	3.64913	0.415014	8.79279	1.45895e-18	1.44601e-16	227.859	184.276	314.865	378.136	46.5886	287.74	27.2262	628.726	400.273	434.023	134.784	518.046	30.2879	276.679	221.36	194.464
Fgd3	242.587	3.4019	0.387467	8.77983	1.63718e-18	1.61252e-16	193.831	232.886	310.133	316.991	51.6326	249.569	29.4499	610.739	323.404	446.594	204.645	214.85	30.1513	245.45	224.096	196.966
Coro2a	342.624	3.6325	0.414091	8.77223	1.7517e-18	1.71459e-16	728.013	436.343	439.755	676.133	68.2662	344.873	19.4941	549.275	417.478	413.676	261.648	360.298	35.3822	287.81	226.993	216.55
Pmepa1	857.489	3.4708	0.395785	8.7694	1.79629e-18	1.74739e-16	858.27	842.991	945.808	1126	138.898	892.941	89.1666	2459.62	953.595	1539.59	1071.99	523.746	143.765	845.56	597.245	690.649
Ptafr	335.196	3.49556	0.399289	8.75446	2.05074e-18	1.98268e-16	106.776	411.937	532.84	522.773	39.5277	493.761	54.9143	435.641	453.195	506.621	223.027	508.901	34.5514	444.415	312.215	282.04
Npc2	1206.56	2.25821	0.258125	8.74852	2.16175e-18	2.07726e-16	967.656	1395.87	1502.88	1792.6	442.711	1297.97	217.161	2127.4	1490.73	1549.51	1407.97	1397.18	425.248	1296.04	1034.67	959.294
Lsp1	1143.4	2.76257	0.316453	8.72981	2.55108e-18	2.43651e-16	475.437	1191.66	1237.09	1583.96	281.759	1683.94	158.804	2340.11	1473.31	1532.12	811.264	1367.05	293.066	1682.68	1082.84	1099.32
Ncf2	374.235	3.1759	0.364265	8.71866	2.81519e-18	2.67257e-16	137.423	296.56	541.337	615.588	81.5901	512.104	60.2128	568.221	519.859	654.507	305.352	585.2	44.1412	402.784	390.119	272.765
Rbp1	386.004	3.82116	0.438981	8.70462	3.18637e-18	3.00683e-16	357.032	400.986	513.712	492.264	57.974	286.795	34.9454	1556.63	482.684	516.504	237.816	319.212	69.1029	244.945	277.616	327.849
Vav1	265.232	3.1546	0.362587	8.70026	3.31112e-18	3.10595e-16	150.686	344.056	367.842	345.286	54.8698	276.647	54.6127	510.64	358.319	386.453	229.392	316.503	25.2829	347.496	214.718	260.901
Itgb2	756.022	2.17284	0.249933	8.69368	3.5088e-18	3.2719e-16	343.534	681.451	910.96	1152.12	232.547	1377.06	196.764	832.23	867.431	837.178	704.774	1020.1	197.23	1322.48	654.271	766.227
Ugt1a7c	244.037	4.57704	0.52664	8.69103	3.5917e-18	3.32951e-16	127.065	262.751	250.518	278.545	17.1327	276.442	9.27343	454.795	400.227	502.914	200.384	414.84	17.2798	326.106	242.852	123.47
Atp5j	1431.44	-0.89609	0.103134	-8.68861	3.66916e-18	3.38142e-16	1020.64	1075.55	1287.52	1133.11	2391.1	1293.15	2400.44	1330.34	1220.25	1273.08	1205.57	1307.68	2148.88	1211.77	1339.87	1264.12
Bmp1	737.464	2.50445	0.288304	8.68684	3.72648e-18	3.39454e-16	479.379	919.909	1021.05	1199.74	197.639	685.943	127.301	1524.74	997.184	952.906	733.563	567.395	302.989	682.125	695.275	712.285
Mrc1	3119.67	3.01881	0.347515	8.68686	3.72597e-18	3.39454e-16	736.936	2627.25	4621.84	5451.28	688.436	3674.41	605.388	4262.42	5162.34	4584.7	2407.06	5653.22	510.423	3396.13	2852.12	2680.8
Rassf4	929.145	2.28244	0.26299	8.6788	3.99974e-18	3.62252e-16	361.481	773.331	1259.69	1610.37	218.72	1470.44	309.517	979.381	1236.2	1256.67	690.969	1328.66	255.149	1146.18	1026.44	943.126
Hmha1	293.793	2.9589	0.34116	8.67306	4.20661e-18	3.76659e-16	221.373	431.549	291.39	318.857	59.5882	511.416	37.5695	534.421	351.487	280.631	372.846	310.658	47.8339	458.447	218.321	254.305
Spp1	18774.2	2.74423	0.316386	8.67369	4.18326e-18	3.76659e-16	5972.03	17466.8	20545.1	22630.7	4105.27	21123.7	2788.88	32468.7	23110.3	40494	13092.6	25495.8	4160.53	20953.7	23164.9	22813.6
Chpt1	509.539	-1.55168	0.179351	-8.6516	5.07824e-18	4.52136e-16	516.529	420.612	385.884	346.767	893.682	457.75	955.136	226.148	344.661	430.55	444.959	483.241	1008.86	401.082	426.542	410.221
Adamts15	754.682	2.4245	0.280339	8.64844	5.22088e-18	4.62224e-16	387.063	923.279	1302.5	1525.44	258.248	744.09	179.719	1113.42	941.311	815.067	751.311	697.754	244.518	822.684	580.769	787.735
Vimp	1039.62	-2.00767	0.232548	-8.63333	5.95887e-18	5.24614e-16	890.911	692.459	725.938	679.439	3188.57	788.44	2174.11	404.292	670.48	480.094	1000.96	857.36	2110.29	747.237	537.108	686.237
Prrx1	807.97	3.77114	0.437699	8.61583	6.94371e-18	6.07921e-16	257.798	740.951	1113.54	1493.18	116.674	595.318	35.034	1250.23	1488.54	2079.48	555.173	747.505	145.398	676.99	883.644	748.066
Pld4	293.744	3.15019	0.365701	8.61412	7.04827e-18	6.13667e-16	105.664	329.382	379.819	399.088	55.3388	472.079	32.4493	490.772	331.36	380.746	272.72	430.351	47.8404	430.979	271.849	269.465
Ift20	942.582	-1.82752	0.212474	-8.60115	7.89245e-18	6.83391e-16	783.86	696.736	622.167	563.953	2055.12	845.902	1963.29	533.942	578.318	414.743	946.095	632.342	2097.68	804.928	716.928	825.306
Lpar1	424.979	2.57304	0.300087	8.57431	9.96838e-18	8.58425e-16	425.401	476.087	634.818	1006.86	155.266	325.137	81.8916	464.15	639.977	539.677	441.312	395.942	108.551	314.7	500.183	289.709
Bgn	11100.6	3.29487	0.384328	8.57306	1.00771e-17	8.63073e-16	3918.99	11057.6	15993.3	18280	2764.39	8629.15	1230.43	24315.4	17270.2	25177.5	6641.41	11756.1	1804.28	9524.05	9470.99	9776.55
Cyb5b	3102.01	-1.63745	0.191669	-8.54313	1.3063e-17	1.11275e-15	2283.45	2685.6	2045.74	1759.62	4550.96	3266.11	7600.63	1755.54	1957.12	2152.88	2859.12	2481.83	5387.36	2961.04	2961.51	2923.69
2020-09-09	1069.65	1.71178	0.200909	8.52015	1.59353e-17	1.35013e-15	823.834	1085.84	1178.01	1412.78	328.82	1394.84	467.297	1869.25	1284.03	1198.05	890.613	1226.15	520.19	1329.88	1011.73	1093.15
Hk1	451.59	1.85809	0.218107	8.51914	1.60736e-17	1.35457e-15	488.738	583.491	536.13	527.36	156.674	545.151	131.833	638.583	525.185	575.322	467.566	601.779	173.367	566.599	333.978	373.687
Zcchc24	689.556	1.62387	0.190645	8.51773	1.62713e-17	1.36393e-15	762.395	833.278	791.467	895.624	327.912	657.881	294.812	999.172	1022.93	920.41	548.988	630.067	280.277	682.275	695.843	689.567
Reep5	3825.56	-1.96897	0.231436	-8.50762	1.77536e-17	1.48031e-15	1890.82	3079.84	2441.04	2307.95	7088.64	3399.16	9907.03	2075.51	2141.04	1871.48	3160.24	2648.12	9326.23	3592.53	2875.01	3404.24
Arl4c	607.478	3.75098	0.441034	8.50496	1.81651e-17	1.50666e-15	341.679	630.999	667.404	859.421	90.0575	415.574	57.2607	1561.2	977.274	1849.48	369.366	419.228	79.5262	355.636	541.157	504.377
Csf1r	2738.85	2.83824	0.333764	8.50371	1.8362e-17	1.51384e-15	759.753	3183.76	3855.47	4161.37	633.636	3538.8	461.152	4552.41	3779.96	3675.27	2365.4	3300.99	619.745	3681.96	2498.28	2753.59
Kirrel	823.656	2.25758	0.265509	8.50282	1.85045e-17	1.51384e-15	1003.94	1046.34	896.017	1098.25	253.155	687.403	177.346	1180.28	1227.71	1479.58	594.363	817.813	260.646	767.412	843.862	844.374
Plek	503.193	3.2422	0.381319	8.50259	1.85399e-17	1.51384e-15	241.608	551.191	695.995	656.276	88.0724	626.973	57.8602	698.826	702.559	1071.89	338.254	828.632	72.3229	621.118	466.133	333.375
Emp1	3450.31	2.64698	0.311415	8.49984	1.8986e-17	1.54227e-15	1976.48	3490.76	4250.37	5281.46	1017.5	2909.46	539.325	6088.36	5079.84	7679.61	2483.99	3751.37	922.543	2924.95	3666.35	3142.53
C1ra	2010.34	2.47558	0.291349	8.49697	1.94604e-17	1.5727e-15	969.881	2792.58	2798.09	3220.74	656.16	1869.59	356.943	2501.42	2891.45	2824.39	1998.37	2126.69	526.245	2212.77	2267.06	2153.02
Cyth4	518.957	3.7283	0.439009	8.49253	2.02186e-17	1.62564e-15	104.551	604.849	664.001	709.948	68.5147	840.674	39.9376	1036.67	627.799	672.027	473.267	645.945	63.7872	745.17	485.21	520.965
Pltp	1180.75	2.77464	0.32677	8.49111	2.04668e-17	1.63724e-15	669.145	1721.41	1686.72	2169.86	317.061	1821.56	142.521	1500.87	1370.93	1222.35	1494.22	1176.37	278.148	1454.72	957.893	908.25
Arhgap30	406.449	3.20865	0.378656	8.47379	2.37542e-17	1.89062e-15	139.773	411.634	565.86	632.392	76.8278	575.383	27.6036	589.257	547.472	654.911	365.655	521.224	85.5032	540.696	404.316	364.68
Nfam1	270.335	3.52502	0.417153	8.45018	2.90858e-17	2.30333e-15	69.7712	230.196	442.948	415.638	23.3847	467.495	48.955	387.441	288.696	392.699	233.765	307.676	27.4349	411.372	285.914	291.968
Ctsh	1571.82	1.98688	0.235152	8.44935	2.92933e-17	2.30817e-15	1005.95	1360.63	2040.19	2165.33	582.495	1784.24	468.227	2600.57	1884.64	2313.15	1185.77	2517.38	595.209	1779.75	1687.5	1178.13
Clec7a	345.447	4.15725	0.492103	8.44791	2.96554e-17	2.32507e-15	62.9621	275.996	591.465	682.305	59.2229	352.457	13.8146	628.207	545.381	728.367	169.009	403.286	34.1405	372.287	319.123	289.134
Tlr13	229.5	4.08888	0.484046	8.44729	2.98154e-17	2.32604e-15	132.126	208.482	364.254	307.73	26.0865	199.028	12.3549	325.826	288.077	520.573	199.113	430.982	18.4173	273.172	193.272	172.5
Cd52	340.334	4.06863	0.482021	8.44078	3.15229e-17	2.44714e-15	63.3937	342.836	469.048	581.297	50.0649	516.417	17.4715	566.429	423.676	583.123	241.956	461.425	23.9185	468.233	327.041	309.011
Gm2663	1022.78	4.06805	0.482084	8.43847	3.21516e-17	2.48371e-15	2762.83	1530.66	696.791	666.246	68.5147	1441.86	59.9065	841.554	675.136	879.565	1490.2	2328.07	0	1051.09	704.337	1167.68
Ildr2	939.938	3.28288	0.390437	8.40822	4.16268e-17	3.19998e-15	493.976	1069.63	1114.81	1348.26	196.92	704.534	80.0921	1268.71	1532.49	2648.1	530.999	1032.98	127.314	860.841	1130.43	898.934
Medag	187.356	3.77347	0.448854	8.4069	4.20977e-17	3.22048e-15	129.021	224.081	296.022	270.456	18.4463	211.893	24.961	391.32	318.168	272.036	289.876	115.317	26.578	156.062	157.343	96.1091
Trp53inp2	1716.37	-1.74428	0.207643	-8.40039	4.45017e-17	3.38793e-15	750.647	1185.76	1091.65	1171.48	3915.01	1429.81	4653.94	1143.15	1153.98	1247.8	1447.86	1248.93	2889.43	1435.9	1394.82	1301.74
Apoo	290.659	-1.65463	0.197007	-8.39885	4.50888e-17	3.41613e-15	189.624	214.836	222.02	195.817	651.879	238.843	696.51	163.121	207.325	171.905	278.367	230.769	507.57	223.967	242.911	215.086
Cdh11	1096.72	4.06988	0.48479	8.39515	4.65313e-17	3.49184e-15	223.562	1475.06	1264.24	1723.34	163.381	802.238	74.8831	1909.04	1804.24	2774.97	599.865	1039.53	61.1294	970.478	1420.21	1241.33
Gprc5a	399.749	3.86191	0.460012	8.39525	4.64908e-17	3.49184e-15	1242.38	403.513	365.246	451.036	65.8796	412.946	14.9766	797.774	460.179	331.853	460.843	366.843	26.578	383.437	279.263	333.238
C1qb	1999.07	3.29989	0.393265	8.39102	4.81952e-17	3.59957e-15	546.114	2245.86	2676.04	2658.39	411.088	2451.06	232.138	5212.02	2431.27	2150.28	2210.75	2384.9	345.514	2609.64	1643.45	1776.67
Naip5	149.641	3.16231	0.377375	8.37974	5.30446e-17	3.94306e-15	117.898	176.063	214.958	206.965	31.6222	162.616	17.4727	216.199	230.478	246.029	139.614	209.744	23.9202	134.358	134.277	132.038
Sema3f	540.686	1.59733	0.190735	8.37462	5.54022e-17	4.09899e-15	572.133	598.374	573.712	606.372	195.893	816.051	272.935	552.068	674.144	533.797	537.757	652.289	136.321	746.018	593.422	589.697
Acsm3	73.92	3.02067	0.360793	8.37232	5.64967e-17	4.16043e-15	73.9201	60.691	142.037	130.496	10.691	32.5981	28.3333	151.352	102.692	104.658	64.4393	31.5164	11.2126	31.882	92.5269	113.674
Rin3	297.289	2.60979	0.311824	8.36942	5.79045e-17	4.24427e-15	191.468	364.608	417.189	484.938	66.0533	551.636	50.936	442.196	282.598	230.652	301.086	397.917	81.3536	327.316	315.836	250.845
Fbn2	519.033	4.43937	0.531222	8.35691	6.43815e-17	4.69717e-15	64.5104	700.041	700.434	592.036	52.7037	418.859	27.4571	1319.35	931.223	707.397	333.653	478.818	42.5248	419.61	778.477	737.435
Lama3	623.341	2.91615	0.349346	8.34746	6.97495e-17	5.06536e-15	388.437	598.607	742.756	928.498	136.448	734.315	118.247	1429.76	815.993	1091.24	344.771	953.837	134.692	661.54	410.343	483.98
Pip4k2a	487.083	2.22321	0.266952	8.32815	8.21162e-17	5.9361e-15	266.913	315.184	683.22	910.654	210.595	582.221	157.468	592.152	812.518	850.142	271.32	592.388	118.693	429.235	502.88	497.746
Atp5o	1789.04	-1.15714	0.139298	-8.30692	9.82186e-17	7.0677e-15	1495.3	1320.22	1412.93	1344.76	3468.81	1509.65	3196.28	1606.39	1396.7	1144.05	1585.27	1453.24	2975.2	1608.18	1510.21	1597.43
Ptgs1	380.496	1.98935	0.239782	8.29651	1.07215e-16	7.67999e-15	398.965	376.016	513.664	545.102	171.846	361.281	93.39	674.677	450.324	460.888	334.816	489.661	149.108	415.363	318.77	334.059
F3	551.537	3.53512	0.426302	8.29253	1.10862e-16	7.83891e-15	1345.82	689.932	544.681	520.299	52.7037	741.134	57.4104	1162.07	499.756	705.837	398.727	687.726	66.445	593.242	379.765	379.047
Mia	518.409	2.67415	0.322479	8.29246	1.10926e-16	7.83891e-15	336.946	746.054	751.4	695.933	175.046	424.053	95.4648	1002.44	721.559	375.956	663.108	392.527	102.646	402.846	636.861	771.705
S100a11	2511.86	2.57632	0.310652	8.29327	1.10179e-16	7.83891e-15	1673.93	2132.13	2942.92	3202.6	777.379	2367.29	536.662	7000.52	3067.6	4172.6	1529.24	2782.66	725.58	2524.9	2421.11	2332.67
Uchl5	754.87	-1.49461	0.180275	-8.29073	1.12557e-16	7.9187e-15	560.971	450.997	545.97	669.672	1669.63	626.552	1559.08	429.482	551.928	459.944	633.802	657.867	1408.38	637.542	617.87	598.242
Slc7a11	199.537	-2.88362	0.347854	-8.28974	1.13496e-16	7.94924e-15	271.819	141.028	81.8817	72.7602	443.871	127.405	340.81	49.331	66.0246	104.888	121.043	242.155	704.732	179.31	95.5172	150.014
A2m	686.393	11.3776	1.37266	8.28872	1.14471e-16	7.9536e-15	60.0614	433.84	1099.38	1258.28	0	624.839	0	1600.41	1122.9	2273.03	214.153	833.962	0	564.303	340.223	556.894
Glrx2	527.942	-1.23799	0.14936	-8.28862	1.14567e-16	7.9536e-15	532.19	404.57	498.986	369.715	993.905	463.668	994.729	410.886	384.48	386.827	421.249	458.228	949.738	392.25	394.023	391.632
Oscp1	157.596	-2.80485	0.339276	-8.26716	1.37191e-16	9.48246e-15	63.4608	104.307	80.992	60.0724	560.477	132.008	483.496	58.6148	74.101	47.8012	144.927	71.4863	388.31	72.2265	102.363	76.8989
Pak1	313.998	3.06991	0.371414	8.26545	1.39169e-16	9.57716e-15	171.286	263.674	385.284	426.299	52.7037	336.073	54.9143	600.492	446.211	808.306	161.502	340.103	58.4716	282.152	371.527	264.974
Fermt3	250.55	3.08729	0.373577	8.26413	1.40715e-16	9.64143e-15	102.327	262.831	324.258	378.474	50.0685	364.654	37.4415	526.985	330.584	231.465	300.524	254.033	50.4982	396.873	180.409	217.368
F2r	726.116	3.53423	0.428475	8.24839	1.60546e-16	1.09526e-14	400.41	614.958	929.965	1373.72	121.218	573.59	87.3636	1632.3	1129.88	2080.06	288.693	676.863	119.601	499.191	541.227	548.81
Retnla	2607.59	3.95316	0.479496	8.24439	1.66e-16	1.12758e-14	632.869	1282.99	4780.08	4452.64	326.763	7364.03	177.223	1251.25	2449.12	2638.18	2083.56	2780.99	122.259	4183.7	3974.77	3221
Sorcs2	297.343	3.45637	0.419775	8.23385	1.81294e-16	1.22618e-14	346.271	490.458	377.671	373.67	106.611	229.226	14.8282	522.916	561.425	412.638	275.136	258.549	29.3219	203.523	283.118	272.129
Arhgdib	686.394	3.16803	0.384824	8.23242	1.83463e-16	1.23555e-14	150.971	673.636	908.043	1205.41	150.679	985.296	79.0027	1198.24	910.573	977.038	469.44	1008.2	123.532	927.895	648.931	565.401
mt-Nd5	30030.8	-1.0139	0.123222	-8.22821	1.90028e-16	1.27432e-14	20735.7	20843.7	21433.8	24553	53604.9	23910.4	54806.9	28121.5	28568.4	27472	21218.9	25329.7	47098.9	22663.1	32160.6	27971.3
Dpep2	125.827	4.34811	0.529277	8.21519	2.11828e-16	1.41449e-14	129.24	90.6662	193.727	234.6	14.4219	167.453	5.95151	245.467	148.777	171.586	76.3423	238.166	10.549	94.9839	88.9811	102.315
4833439L19Rik	2147.32	-1.7284	0.210476	-8.21184	2.17824e-16	1.44839e-14	2182.84	1254.53	1470.67	1630.88	5278.1	1743.06	4354.93	1000.19	1383.65	1218.99	1942.13	2043.05	3993.92	2058.12	1358.73	1443.26
Lrig3	150.871	3.0031	0.365738	8.21108	2.19212e-16	1.45149e-14	162.388	185.33	243.194	249.842	28.987	118.266	24.961	242.683	264.622	266.314	98.7944	88.5771	39.867	111.62	157.343	131.139
Dock10	419.614	2.52064	0.307013	8.21019	2.20846e-16	1.4562e-14	289.027	430.917	476.364	612.184	127.618	494.232	78.9748	438.98	681.533	842.725	275.263	518.895	81.8194	476.489	482.494	406.308
Cd300lf	152.198	6.48313	0.791078	8.19532	2.49937e-16	1.64115e-14	177.346	132.223	173.913	173.852	6.02966	176.301	1.21105	335.537	190.695	230.039	127.317	260.167	0	174.325	159.72	116.5
Actn1	3051.99	1.22799	0.149883	8.19301	2.54776e-16	1.66598e-14	3565.81	3617.66	3386.58	3306.19	1241.7	3651.56	1741.16	4302.52	3307.11	3129.49	3267.17	2929.3	1598.31	3381.33	3097.47	3308.45
Dock2	644.718	3.518	0.429727	8.18659	2.68739e-16	1.75003e-14	120.796	655.54	899.374	994.11	107.652	971.761	67.1509	668.869	876.009	1055.43	490.416	1009.08	50.3155	1077.9	675.942	595.152
Kng2	367.697	2.96458	0.362963	8.16774	3.14217e-16	2.03776e-14	261.223	368.692	609.979	574.672	57.3539	454.999	121.354	618.471	398.096	534.743	303.878	601.584	32.3039	366.681	282.455	296.66
Il10ra	269.068	3.23701	0.397172	8.15014	3.63503e-16	2.34772e-14	133.1	331.351	330.369	355.653	60.8175	353.84	18.3516	436.596	340.421	502.943	210.945	354.391	37.3371	328.005	275.721	235.24
Qdpr	852.099	-1.61572	0.198299	-8.14787	3.70395e-16	2.38247e-14	1035.43	623.248	643.312	571.801	1722.55	811.398	1612.74	510.444	489.939	462.288	854.393	660.346	1753.83	615.712	584.475	681.681
Pik3cg	261.288	2.99349	0.367419	8.14733	3.72038e-16	2.38331e-14	109.985	291.102	335.342	388.709	39.6497	264.36	47.5414	383.387	404.76	510.796	180.846	315.14	55.2237	337.135	259.947	256.681
Penk	1139.86	2.62717	0.323314	8.12575	4.44589e-16	2.83655e-14	904.656	1317.42	1096.02	1307.05	307.724	965.678	230.707	2890.91	1907.4	1693.12	821.147	1335.01	336.823	985.42	1045.08	1093.65
Ikzf1	253.795	3.47544	0.427738	8.12516	4.46784e-16	2.83906e-14	80.5869	268.201	379.282	400.237	35.5045	278.696	22.5273	342.071	366.295	421.962	254.614	393.509	43.4737	297.354	282.346	194.054
Phf10	1025.34	-1.58556	0.195752	-8.09984	5.50317e-16	3.48291e-14	713.258	639.515	797.898	708.062	2089.64	788.73	2246.55	788.746	622.839	679.018	857.405	1186.16	2229.54	641.561	697.248	719.271
Cd74	7675.26	3.78071	0.46725	8.09141	5.8978e-16	3.70594e-14	1480.64	7727.37	12149.9	14128.9	1322.25	12644.7	731.327	11982.7	9159.02	11956.3	8559.54	4539.7	534.174	10205.7	7490.36	8191.44
Ly86	487.549	3.58964	0.443641	8.09131	5.9026e-16	3.70594e-14	97.8779	450.688	640.319	709.948	79.0555	599.215	42.4337	998.839	662.72	951.345	380.388	715.302	66.445	534.331	440.725	431.143
Evi2b	212.682	3.36629	0.416074	8.0906	5.9373e-16	3.71293e-14	63.3982	191.227	292.379	331.474	34.2574	358.74	22.4649	242.683	313.512	380.746	150.262	300.828	29.2358	307.99	196.885	186.829
Ndufb9	1317.47	-1.53788	0.190245	-8.08365	6.28545e-16	3.91511e-14	1403.66	935.915	972.775	781.685	2732.68	1108.74	2466.15	944.249	919.582	626.255	1250.61	1074.62	2681.72	1143.08	987.719	1050.01
Myo9b	711.183	1.24732	0.154321	8.0826	6.34017e-16	3.93365e-14	656.903	807.525	832.281	905.851	332.05	803.83	417.317	779.62	837.094	799.474	718.759	763.66	308.842	954.568	683.649	777.496
Eif2s2	3319.61	-1.41864	0.175554	-8.08089	6.42977e-16	3.9736e-14	3171.33	2255.96	2690.95	2587.72	6784.61	3043.96	6315.96	1857.72	2202.34	2178.93	3124.62	3490.3	5617.52	2703.3	2657.74	2430.71
Clec10a	386.241	3.11236	0.385272	8.07833	6.56583e-16	4.04183e-14	196.706	316.634	476.999	480.713	94.4362	605.151	34.7259	1044.83	676.023	389.23	311.803	492.507	112.809	483.715	217.209	246.362
Ssx2ip	554.712	-1.71707	0.212773	-8.06998	7.03106e-16	4.31138e-14	345.017	354.361	338.343	374.252	749.665	453.95	1539.33	329.716	430.671	406.656	419.661	438.234	1341.51	436.92	471.913	445.186
Sash3	172.289	4.06074	0.503338	8.06762	7.16834e-16	4.37852e-14	37.8165	173.536	249.57	287.772	21.0815	265.113	7.48831	261.601	244.446	247.589	135.473	223.114	18.6046	271.816	149.929	161.679
Bcl2a1b	183.395	6.51387	0.80753	8.06641	7.23935e-16	4.40482e-14	73.4084	157.53	274.162	271.281	7.90555	171.486	2.4961	451.315	266.95	361.501	102.935	273.252	0	186.034	149.929	184.134
Prkcd	888.887	1.21594	0.150778	8.06441	7.35905e-16	4.46044e-14	866.606	826.551	1051.04	1152.13	430.17	1168.09	414.028	1065.46	927.325	1135.46	748.47	1132.22	511.469	1016.47	880.137	896.582
Ube2f	1211.17	-1.58774	0.197047	-8.05764	7.77836e-16	4.69652e-14	837.429	797.242	954.56	836.445	2821.52	1111.69	2311.01	634.054	765.033	863.087	1276.39	1159.71	2052.85	1049.59	904.38	1003.68
Gpr35	161.516	4.04483	0.502215	8.05398	8.01438e-16	4.82056e-14	146.689	144.4	125.969	261.179	10.1037	189.879	24.0995	192.45	226.478	299.072	113.132	159.398	5.11355	300.555	228.929	156.813
Srp19	672.58	-1.27598	0.158444	-8.05318	8.0668e-16	4.83364e-14	477.326	484.791	521.439	477.58	1235.65	582.056	1322.49	446.195	501.098	515.075	628.8	695.529	972.468	676.922	611.727	612.139
Igsf6	159.862	3.49189	0.433923	8.04726	8.467e-16	5.05422e-14	134.582	161.742	200.384	221.807	15.8111	225.691	34.9454	218.901	209.525	322.49	99.9776	207.237	5.3156	191.202	168.052	140.122
C3ar1	601.626	3.38509	0.421385	8.03325	9.49266e-16	5.64509e-14	165.725	678.138	946.36	816.317	105.407	607.099	62.4026	863.715	855.949	986.715	449.012	1303.59	82.3919	668.689	569.236	465.276
S100a6	454.12	3.841	0.478937	8.01986	1.05868e-15	6.27211e-14	1054.41	582.104	468.171	478.246	52.7037	371.552	44.9298	1625.82	507.516	488.936	358.499	271.581	63.7872	335.895	303.977	257.788
Cnn2	589.953	2.96151	0.369347	8.01823	1.07276e-15	6.3317e-14	328.238	816.844	716.798	771.73	142.887	720.195	91.2018	1538.87	774.281	774.815	613.536	439.193	132.104	679.726	431.791	467.036
Cxcl16	474.412	3.17259	0.395698	8.0177	1.07747e-15	6.33577e-14	321.642	515.402	582.286	655.243	62.5404	469.733	69.1195	1245.38	554.272	947.038	336.761	457.904	120.335	485.826	396.818	370.29
Ahnak2	273.859	3.23841	0.403983	8.0162	1.09065e-15	6.38944e-14	276.121	413.804	268.675	405.332	41.1326	237.245	18.9036	563.062	454.925	456.808	184.198	179.871	76.7859	224.276	300.738	279.871
Icosl	162.958	4.01151	0.500798	8.01024	1.14489e-15	6.68232e-14	149.041	211.444	153.021	275.404	2.63518	168.529	19.9688	227.549	290.231	330.292	96.4281	147.907	21.2624	190.168	158.167	165.272
Casp9	2028.24	-2.91001	0.363539	-8.00466	1.19801e-15	6.96657e-14	538.878	1211.26	757.148	654.969	6700.68	1799.72	6734.9	1023.41	1066.63	427.293	1073.5	877.307	6309.41	1202.43	711.42	1362.89
Icam1	349.926	2.86718	0.358225	8.00385	1.20584e-15	6.98631e-14	221.337	459.955	371.622	477.422	102.772	462.223	52.4181	609.14	462.507	619.493	312.948	276.595	42.5248	394.806	376.47	356.592
Rab2a	2675.14	-0.93697	0.117219	-7.9933	1.31371e-15	7.58345e-14	2719.45	2139.72	2390.04	2258.48	4529.88	2250.01	4220.91	1944.71	2214.76	2405.15	2540.26	2252.87	3891.02	2137.33	2575.98	2331.77
Mgst1	863.257	1.7755	0.222319	7.98626	1.39093e-15	7.99986e-14	1022.74	852.875	940.154	938.584	295.789	787.03	281.067	1168.53	1119.85	1307.59	678.836	1276.48	336.788	960.619	969.577	875.599
Try4	605006	-4.31012	0.540216	-7.9785	1.48121e-15	8.48815e-14	259315	334290	177808	127170	2.01448e+06	402873	2.36942e+06	41233.5	100668	28585.6	550472	165608	2.26466e+06	412262	178829	252434
Col6a5	355.059	6.00992	0.753411	7.97695	1.49999e-15	8.56463e-14	12.8089	358.64	575.118	637.918	7.53309	177.769	10.2663	397.17	870.209	1264.13	122.039	225.962	10.9314	173.269	466.267	370.908
Tpm3	3132.55	1.27726	0.160271	7.96938	1.59471e-15	9.07257e-14	2682.13	3135.69	3424.82	4063.54	1578.29	3109.96	1584.49	4465.07	3556.53	4277.24	2955.79	3995.96	1637.87	3435.01	3284.28	2934.06
Atf4	3404.79	-1.64599	0.206709	-7.96284	1.68139e-15	9.5313e-14	2494.77	2670.43	2191.48	2190.04	7470.74	3102.51	6107.96	1867.96	2102.23	1854.32	4126.29	3406.04	6022.58	3042.69	2716.02	3110.52
Adam8	148.62	3.05307	0.384536	7.93961	2.02813e-15	1.14557e-13	173.814	110.389	165.789	201.078	16.6393	233.454	18.97	190.087	159.363	170.855	122.302	175.772	27.9607	272.671	204.045	134.723
Slc25a24	557.51	2.38522	0.301027	7.92361	2.30714e-15	1.29851e-13	501.779	520.148	646.567	804.76	170.583	537.863	131.75	874.162	737.281	1282.07	368.221	631.641	137.638	483.761	547.208	544.732
Pdgfc	430.091	3.49805	0.44156	7.92202	2.33688e-15	1.31056e-13	771.69	377.896	557.831	737.125	94.9414	266.333	30.8333	619.054	715.356	1018.46	302.71	331.283	49.2461	294.879	332.412	381.411
Irf5	220.197	3.01269	0.380322	7.92144	2.34781e-15	1.31203e-13	115.16	257.493	303.914	304.225	46.3797	309.654	24.6482	338.182	222.225	255.826	265.103	281.789	40.3213	384.14	170.087	204
Rnasel	407.747	2.26717	0.286521	7.91274	2.51792e-15	1.40212e-13	249.24	381.756	705.991	508.996	107.331	461.804	181.043	451.456	608.736	558.475	269.901	632.36	79.6435	479.955	476.548	370.725
Ndufa1	403.271	-1.59859	0.202079	-7.9107	2.55955e-15	1.42028e-13	292.521	297.37	322.437	281.176	924.949	349.87	786.272	245.386	263.846	198.175	359.683	305.006	813.287	324.526	340.223	347.609
Tmem229b	403.139	2.58179	0.326786	7.90056	2.77653e-15	1.53528e-13	551.798	301.641	751.673	901.145	150.181	304.612	76.5764	415.524	490.529	404.029	476.346	423.873	93.959	438.445	342.369	327.517
Col28a1	236.814	5.03912	0.639497	7.87982	3.27854e-15	1.80652e-13	50.0512	215.656	566.541	557.404	21.0815	268.07	0	210.253	274.711	425.999	199.364	356.815	15.9468	225.308	195.237	206.59
Fgr	166.144	4.14869	0.5269	7.87376	3.44128e-15	1.88958e-13	57.2594	158.731	238.919	263.504	9.69008	273.013	9.17866	256.574	202.172	273.445	179.058	198.222	22.8043	243.724	130.53	141.483
Msrb1	1268.39	-1.96283	0.250115	-7.84771	4.2371e-15	2.31849e-13	1015.47	939.828	913.453	645.339	3465.43	1035.24	2702.95	873.413	756.567	403.76	1160.38	652.976	3155.81	931.824	748.438	893.301
Gas7	1476.62	2.97246	0.378931	7.84432	4.35305e-15	2.37369e-13	410.547	2191.93	1703.27	1645.13	195.037	1800.03	182.375	1802.5	2094.54	2016.64	1456.82	1780.13	315.242	1830.45	2323.66	1877.55
Nucb2	5338.22	-2.42349	0.309399	-7.8329	4.76748e-15	2.59071e-13	3658.63	3781.15	2955.52	3031.9	11935.1	4938.65	16001.5	1337.96	2628.04	1946.1	4685.19	3292.4	12103.5	4205.75	4399	4511.1
Clybl	217.488	-1.56101	0.199337	-7.83101	4.83971e-15	2.62093e-13	153.49	122.992	183.989	164.912	479.603	190.211	474.259	120.531	155.204	128.476	172.151	184.675	422.591	177.766	163.933	185.032
Pcca	831.512	-1.95958	0.250402	-7.82572	5.0476e-15	2.72415e-13	585.731	690.41	527.923	562.156	1960.94	889.711	1931.18	343.099	527.466	417.089	572.373	482.784	1824.1	635.471	578.009	775.753
Ltbp2	240.994	5.71304	0.73009	7.82511	5.07199e-15	2.72797e-13	71.6464	360.906	362.101	297.33	6.60339	139.909	5.70928	706.44	514.78	612.383	192.037	145.711	17.576	176.014	88.7249	158.026
Klhl6	124.548	2.88017	0.368342	7.81928	5.31278e-15	2.8381e-13	98.7346	85.8332	242.553	238.623	41.2219	102.796	26.8443	203.975	187.399	175.953	75.7677	170.749	20.7879	136.411	89.3993	95.7203
Plscr1	431.612	3.01738	0.385886	7.81936	5.30926e-15	2.8381e-13	525.958	448.602	512.202	516.496	74.842	316.822	81.5258	846.328	543.28	1135.38	282.457	399.899	67.936	349.308	438.683	366.073
Cd84	431.625	2.91851	0.373387	7.8163	5.43988e-15	2.89619e-13	192.008	330.153	719.639	647.162	96.2494	558.714	42.2994	487.886	584.997	801.46	311.685	745.891	119.193	457.373	467.308	343.987
Unc93b1	801.081	2.36932	0.303282	7.81228	5.61617e-15	2.97998e-13	368.786	1029.23	1023.89	1031.92	232.498	1144.08	211.639	1424.81	923.561	873.101	1023.58	881.188	195.401	1030.23	730.093	693.284
Sbk1	174.493	2.03471	0.260687	7.80516	5.94246e-15	3.13292e-13	218.001	210.602	212.225	202.842	55.3388	194.153	57.4104	304.84	212.629	196.615	199.955	174.647	58.4716	151.928	149.105	193.116
Tmem45a	326.636	4.1759	0.535021	7.80513	5.94417e-15	3.13292e-13	66.1777	333.675	367.419	754.251	19.4427	316.481	24.8735	564.527	396.152	698.108	204.503	376.912	50.1779	411.695	355.319	286.467
Adcy7	741.237	2.87118	0.368405	7.79354	6.516e-15	3.42285e-13	210.782	946.597	960.209	1042.27	173.488	847.789	130.193	1132.24	1103.33	1350.46	564.356	831.356	130.891	862.076	817.197	756.557
1110008F13Rik	1090.81	-1.15131	0.14788	-7.78549	6.94455e-15	3.63585e-13	968.809	727.206	913.996	912.084	2313.86	946.115	1810.73	851.059	853.813	749.776	988.322	950.612	1756.11	905.755	894.219	910.545
Abcc4	343.129	2.05282	0.263752	7.78315	7.07388e-15	3.6913e-13	278.516	379.236	425.503	448.892	104.749	336.604	61.1697	407.109	466.652	541.038	370.379	442.784	151.699	332.684	388.468	354.574
Ptgr1	367.457	1.96812	0.252927	7.78136	7.17483e-15	3.73162e-13	299.195	304.109	427.183	478.246	152.841	323.261	109.829	757.777	464.059	556.555	285.143	430.351	146.179	361.733	392.122	390.724
Cela1	545139	-5.03632	0.647415	-7.77912	7.30301e-15	3.77338e-13	164287	172313	113995	86067.8	2.15729e+06	263585	2.10795e+06	14479.4	59791.5	10969.3	366905	115148	2.48666e+06	283724	131980	187076
Coro1a	384.714	3.10106	0.398621	7.77947	7.28294e-15	3.77338e-13	117.367	424.437	455.549	508.418	92.0997	668.669	45.3595	710.314	589.242	527.487	272.418	472.673	62.0816	539.126	378.905	291.282
Ero1lb	5104.79	-3.13358	0.40292	-7.77719	7.41551e-15	3.81899e-13	3614.81	2750.46	2286.2	2189.21	14822.9	3585.43	17113.3	636.706	1830.63	1100.11	4122.15	2897.14	13751.5	3344.48	3752.34	3879.39
Arhgap15	106.314	3.87047	0.497758	7.77581	7.49675e-15	3.84825e-13	37.8342	74.9403	167.327	279.393	10.5457	111.001	17.4809	131.093	181.151	178.699	58.0462	108.685	10.6362	139.04	101.84	93.3113
Gabrp	261.124	4.84294	0.622879	7.77509	7.53943e-15	3.8576e-13	95.2007	290.275	322.598	463.876	10.3703	69.812	7.3672	516.335	467.243	1147.82	116.403	92.0773	28.763	75.2438	263.4	211.202
Gramd3	1000.67	-1.22685	0.157921	-7.76879	7.92394e-15	4.04121e-13	843.084	881.159	788.785	674.492	1394.01	991.464	1931.98	600.492	793.867	721.961	918.729	946.773	1685.05	953.942	939.939	944.923
Clic1	1419.88	1.80329	0.232371	7.76038	8.46761e-15	4.30455e-13	1131.6	1393.16	1712.51	1739.73	596.996	1507.19	613.792	3150.58	1702.05	1792.81	1165.9	1528.13	574.465	1620.23	1251.81	1237.17
2210407C18Rik	439.11	4.3605	0.562102	7.75749	8.663e-15	4.38972e-13	367.602	155.767	691.163	544.104	56.8652	394.007	34.0194	1046.28	483.868	852.298	253.845	1120.57	9.05579	519.013	258.374	238.922
Chrnb1	254.533	2.52339	0.325673	7.74822	9.31922e-15	4.69206e-13	243.724	252.38	276.828	321.477	57.927	262.8	51.7521	568.538	373.277	417.971	173.804	229.833	91.4466	244.31	242.435	264.019
Cyba	396.855	2.95339	0.381153	7.74856	9.29406e-15	4.69206e-13	254.705	470.906	427.183	469.176	71.1499	525.298	99.8441	1149.1	434.571	329.252	538.932	353.473	69.1029	463.018	331.986	361.981
Mmp19	437.7	2.5033	0.32315	7.74656	9.44143e-15	4.73845e-13	175.735	386.665	530.108	645.632	160.746	335.087	92.3558	850.202	687.553	830.152	281.002	510.572	106.312	459.918	477.796	473.36
Grk5	249.748	1.74195	0.225056	7.74005	9.93765e-15	4.97166e-13	222.45	249.353	305.131	337.246	115.948	292.708	69.8909	322.136	311.184	344.856	191.081	345.952	100.996	259.414	284.206	243.416
Samd5	249.862	4.33992	0.560779	7.73908	1.00137e-14	4.99383e-13	173.511	260.304	290.557	358.685	23.7166	136.006	17.4727	442.667	378.697	1063.7	153.22	134.537	13.289	137.459	239.722	174.254
Trim35	638.737	1.73651	0.224435	7.73726	1.01585e-14	5.05007e-13	487.052	720.301	730.551	830.178	281.37	697.014	180.148	1059.75	751.868	925.662	544.888	664.539	299.329	675.406	665.841	705.898
Cybb	1182.55	3.04586	0.394141	7.72785	1.0938e-14	5.42049e-13	468.713	1254.56	1548.1	1601.27	263.909	1613.73	171.765	1213.8	1509.6	2625.34	893.115	2155.32	101.659	1362.32	1214.65	922.892
Gars	2654.1	-1.40537	0.181925	-7.72498	1.11868e-14	5.52641e-13	1964.23	1930.8	2290.76	2297.23	5381.04	2257.9	5633.7	1560.96	1763.89	1457.97	2611.25	2509.41	4698.99	2243.78	1922.72	1941.04
Rasgrp4	139.725	4.90481	0.636389	7.70725	1.28558e-14	6.33109e-13	20.2781	133.944	143.898	269.723	8.56897	217.281	4.50299	197.179	244.621	118.461	139.283	149.549	7.75142	337.02	88.1417	155.391
Ica1	1072.6	-1.88435	0.244623	-7.70307	1.32832e-14	6.52116e-13	1221.78	835.066	736.187	642.441	2647.26	822.286	1948.05	490.042	611.582	438.24	1080.47	746.352	2274.16	906.467	872.645	888.583
Dab2	1567.1	2.01896	0.262374	7.69498	1.41511e-14	6.90427e-13	651.718	1665.89	2021.94	1747.9	443.01	2224.41	424.306	2162.07	2078.04	2179.94	1098.87	2413.36	618.011	2033.82	1759.61	1550.68
Sdc1	1594.78	2.63172	0.341992	7.69527	1.41195e-14	6.90427e-13	1850.21	1913.49	1610.01	1806.84	227.471	2267.09	419.284	4135.08	1658.98	1906.36	1465.12	1580.09	468.147	1675.78	1207.56	1324.96
Rasgrp1	201.353	3.49014	0.453681	7.69294	1.43788e-14	6.99368e-13	37.8684	173.849	279.961	358.191	34.8909	264.965	14.8873	266.776	288.066	335	125.325	314.643	27.6496	234.342	233.727	231.511
Phldb2	1207.28	2.43055	0.316193	7.68693	1.5071e-14	7.30781e-13	865.23	1283.42	1507.08	1554.06	298.169	994.093	382.276	1808.09	1860.89	2957.04	753.826	1369.92	258.055	1036.18	1293.75	1094.31
Ufc1	1198.42	-1.28629	0.167409	-7.68348	1.54824e-14	7.48425e-13	1324.79	922.042	918.978	888.573	2256.07	1031.67	2203.13	915.168	814.093	672.054	1147.89	1052.38	2010.48	1003.66	986.549	1027.28
Mal	466.038	3.59248	0.467811	7.67934	1.59912e-14	7.70661e-13	825.269	481.004	520.987	638.196	65.878	183.308	44.9458	962.062	640.976	1399.68	286.319	319.204	61.128	206.7	437.42	383.529
Bcl2l2	1177.52	-1.44707	0.188506	-7.67653	1.63458e-14	7.85347e-13	1222.3	1077.83	789.254	692.901	1839.56	1256.6	2230.28	659.526	889.462	637.094	1222.87	998.651	2126.66	1125	1035.65	1036.63
Tns4	149.599	4.65409	0.606358	7.67547	1.64814e-14	7.89456e-13	164.951	387.886	190.475	168.662	18.5194	146.57	5.55528	213.382	125.882	169.466	266.951	120.406	0	160.122	93.5035	161.257
Unc5c	113.499	4.26377	0.556147	7.66663	1.7658e-14	8.43247e-13	42.9372	125.943	154.05	192.97	12.0068	67.3247	8.82004	186.296	167.428	211.451	52.5701	137.04	7.04355	108.038	149.324	192.739
Chchd7	303.342	-1.6726	0.218259	-7.6634	1.8108e-14	8.62127e-13	291.44	186.901	240.285	178.002	779.661	206.141	529.927	235.603	194.777	159.031	216.246	240.624	719.545	223.029	237.281	214.984
BC004004	1306.87	-1.37419	0.179616	-7.65072	1.99863e-14	9.48687e-13	1394.46	1152.72	1049.36	800.609	2222.68	1242.13	2388.31	891.957	872.34	682.473	1205.82	1093.63	2414.37	1260.51	1088.13	1150.42
Pex2	664.785	-0.999486	0.130692	-7.64763	2.04719e-14	9.68818e-13	607.204	548.103	570.121	560.746	1091.36	612.248	1074.88	427.344	560.603	537.321	602.766	643.979	1003.79	608.002	606.741	581.357
Slco2a1	656.044	2.04929	0.268034	7.64563	2.0793e-14	9.8107e-13	622.814	852.337	747.699	790.713	174.281	691.371	169.939	1177.44	960.121	967.202	579.616	573.75	322.998	561.962	645.774	658.681
Palld	742.055	2.86995	0.375447	7.64409	2.10427e-14	9.89885e-13	296.842	785.917	962.609	1145.46	158.117	674.536	178.299	1734.49	927.724	1658.86	610.425	567.477	152.64	695.045	685.465	638.983
C1qc	1268.63	3.03402	0.397202	7.63848	2.19796e-14	1.03088e-12	439.673	1653.39	1534.74	1392.37	276.403	1592.09	187.011	3383.85	1471.44	1298.9	1643.78	1363.51	249.571	1609.31	1016.94	1185.07
Ctrl	142874	-4.20692	0.550977	-7.63539	2.25139e-14	1.05281e-12	50004.5	65706.1	36818.8	40074.6	515653	69104.8	450591	11155.3	30804.8	6593.36	136933	28412.4	679953	60554.1	42879.7	60742.7
Ahsg	149.012	9.2072	1.20665	7.6304	2.34034e-14	1.09117e-12	107.888	133.943	308.774	352.913	0	177.399	0	284.302	183.14	141.479	110.034	216.429	0	153.995	88.1451	125.75
Npnt	294.667	3.09878	0.406403	7.62491	2.44214e-14	1.13527e-12	163.188	275.317	437.959	486.069	72.7652	164.222	62.7604	748.594	446.099	787.062	125.05	165.68	49.5565	158.468	318.727	253.155
Anxa2	3566.5	2.68747	0.352576	7.62239	2.49021e-14	1.15421e-12	2048.23	3549.62	4071.03	4823.24	1177.02	2886.43	631.597	10035.5	4634.88	6580.17	2586.13	3609.3	935.767	3144.91	3544.88	2805.2
Ppp4r4	214.244	-2.41074	0.316374	-7.61991	2.53852e-14	1.17315e-12	349.592	327.079	109.361	111.079	584.658	182.217	415.35	49.9659	105.659	65.2905	177.927	123.599	504.714	124.1	97.6321	99.6761
Abr	655.231	1.34083	0.176049	7.61624	2.61171e-14	1.20345e-12	725.459	694.094	712.69	857.568	277.627	674.551	309.704	881.13	715.904	975.46	686.457	657.243	351.227	587.977	669.363	707.245
Dopey2	246.049	4.34034	0.570331	7.61022	2.73625e-14	1.25716e-12	332.562	211.444	246.837	376.825	0	214.85	42.4337	273.492	272.383	602.848	204.096	274.088	0	297.655	280.087	307.19
Vil1	424.004	3.10558	0.408286	7.60639	2.81852e-14	1.29119e-12	333.702	686.705	562.268	468.206	61.5421	311.652	29.147	874.65	420.656	689.828	402.663	400.978	124.141	453.553	556.083	408.295
Col12a1	1589.3	5.55059	0.730278	7.60065	2.94643e-14	1.34588e-12	349.766	1194.91	1518.18	1943.24	81.9268	581.842	43.4938	4943.98	3501.72	6421.71	411.987	1279.23	66.104	713.733	1272.9	1104.02
Scfd2	334.05	-1.88137	0.247545	-7.60012	2.95863e-14	1.34754e-12	222.296	282.607	231.358	255.864	833.907	305.249	988.844	160.475	195.36	155.609	283.364	231.372	501.524	274.738	200.321	221.911
Thbs4	1207.8	11.2662	1.4855	7.58407	3.34889e-14	1.5209e-12	38.9287	607.376	1132.17	1533.69	2.63518	1426.09	0	3922.93	2571.73	4434.76	220.069	1389.66	0	778.243	645.024	621.565
Isca1	1135.75	-1.02561	0.135284	-7.58116	3.4248e-14	1.5509e-12	1160.57	938.964	884.709	914.249	1821.38	1059.61	1790.67	776.639	947.487	826.055	1131.23	994.625	1763.98	1004.54	1068.5	1088.81
Psat1	1062.14	-2.43347	0.321037	-7.58006	3.45407e-14	1.55968e-12	495.931	805.432	502.995	726.79	2327.38	688.716	4070.95	351.996	586.93	299.197	844.267	818.246	2379.49	758.516	651.361	686.1
Gsdmd	180.025	3.16645	0.417921	7.57667	3.54529e-14	1.59629e-12	110.113	229.977	225.888	225.106	15.8111	222.734	24.961	390.78	246.774	293.362	158.544	177.99	50.4982	199.47	145.81	162.577
Fgfr1op2	1175.56	-1.17696	0.155469	-7.57039	3.72102e-14	1.67064e-12	833.913	927.457	891.293	954.078	2094.86	1128.08	2051.78	695.404	932.381	1129.91	1096.85	1220.77	1737.3	1123.6	1085.48	905.848
Ms4a8a	111.179	4.4598	0.589148	7.56991	3.73473e-14	1.67204e-12	129.381	81.6579	175.442	265.327	21.2404	142.85	5.02984	171.705	154.456	166.501	78.2662	109.328	0	127.162	89.8307	60.6803
Timp2	4127.1	1.68586	0.222833	7.56555	3.86221e-14	1.72421e-12	5278.22	4451.69	5186.9	6052.36	2111.46	3619.36	1309.54	5008.74	5429.57	5817.42	3196.75	4483.64	1635.21	4658.16	4196.12	3598.51
Epha3	749.552	4.40593	0.582433	7.56469	3.88796e-14	1.7308e-12	67.8472	657.921	886.245	1198.09	63.2444	352.827	34.9454	1044.78	1444.17	3142.2	366.19	615.026	63.7872	440.281	871.565	743.722
Zfp706	2122.51	-1.19258	0.157686	-7.56301	3.93842e-14	1.74832e-12	1899.72	1703.35	1639.51	1629.34	3301.88	2158.36	4066.15	1214.5	1590.84	1614.01	2117.87	1998	3037.87	1972.99	2028.98	1986.85
Asnsd1	1172.13	-1.14703	0.151909	-7.55079	4.32616e-14	1.90969e-12	1230.8	813.693	1013.47	881.985	1986.33	1087.74	1823.22	788.309	911.23	879.217	1115	1131.61	2160.86	1065.36	960.288	905.039
B230118H07Rik	261.403	-1.74752	0.231433	-7.55089	4.32291e-14	1.90969e-12	143.548	181.318	175.868	144.104	621.318	201.939	491.689	204.839	158.023	135.687	250.58	214.816	606.793	234.176	203.669	214.082
Myadm	2307.19	1.18635	0.157373	7.53844	4.75642e-14	2.09376e-12	1976.52	2268.66	2511.85	2982.36	1416	2132.35	1281.32	3383.89	3145.87	3232.48	1802.81	2266.89	1266.34	2399.12	2590.85	2257.65
Lrp1	3794.3	2.12819	0.282514	7.53303	4.95767e-14	2.17626e-12	4411.69	4737.08	4420.06	4731.77	1003.53	3870.89	943.63	8899.68	4406.13	3976.77	3783.34	3667.59	1914	3144.86	3360.86	3436.92
Adamts7	209.135	2.92114	0.388414	7.5207	5.44855e-14	2.3851e-12	166.937	324.581	242.345	346.471	39.468	179.866	64.0885	474.647	268.541	299.829	148.418	164.165	33.7752	174.789	156.062	262.177
Rcsd1	253.007	2.04913	0.272754	7.51275	5.78959e-14	2.52737e-12	150.026	291.604	312.396	396.169	85.1089	233.027	64.2229	342.36	320.227	314.709	278.855	324.358	100.003	330.712	270.897	233.442
Mfap4	832.678	3.60499	0.479919	7.51166	5.83832e-14	2.54161e-12	177.066	1304.32	1297.31	1275.62	164.34	519.458	65.2794	2112.61	1462.01	1171.96	609.335	396.733	149.71	800.481	903.194	913.423
Basp1	256.247	2.90177	0.386369	7.51036	5.89629e-14	2.55977e-12	106.776	280.522	283.271	361.158	60.6092	210.908	52.4181	529.147	349.208	548.753	256.156	213.922	39.867	219.107	340.223	247.907
H2-DMb1	408.754	3.70172	0.493333	7.50349	6.21393e-14	2.69026e-12	85.7368	354.27	591.632	826.122	85.8806	784.539	22.6386	632.823	455.505	561.292	382.322	323.992	37.6932	596.432	377.609	421.576
Aoah	183.886	3.81105	0.507936	7.50301	6.23688e-14	2.69279e-12	48.9389	189.542	262.321	277.053	21.0815	160.645	17.4727	289.166	289.455	331.332	146.121	378.542	21.2624	187.068	162.286	159.882
2210418O10Rik	242.146	-1.2776	0.170391	-7.49806	6.47674e-14	2.78871e-12	231.041	211.804	161.481	177.461	349.739	229.971	432.642	136.509	201.53	210.19	215.035	239.817	444.793	220.083	222.743	189.491
Tdh	462.992	-7.5528	1.00788	-7.49374	6.69358e-14	2.87423e-12	14.4499	86.7405	21.1231	20.6521	1955.21	69.5642	3994.07	4.01585	2.88287	1.932	94.2768	46.5651	898.499	82.579	25.2177	90.0944
Kcnd3	79.97	-3.13568	0.418498	-7.49269	6.74739e-14	2.88946e-12	164.198	67.2782	27.6677	27.3157	223.319	52.3788	151.598	14.4238	25.7777	27.6657	46.4971	53.3388	247.019	59.0823	49.576	42.3828
Flna	6189.01	2.29236	0.306028	7.4907	6.85061e-14	2.92571e-12	3986.66	5753.3	7830.96	8556.18	3116.2	6458.1	1545.56	15110.3	8931.17	9334.32	3519.75	6288.65	1538.27	5615.95	5675.64	5763.16
Cd38	415.723	2.71384	0.3624	7.48852	6.96547e-14	2.96673e-12	162.388	428.786	628.478	738.808	115.948	289.752	99.8441	785.343	594.43	738.606	333.061	558.203	98.3387	373.102	372.351	334.136
Deb1	222.491	-1.6311	0.218106	-7.4785	7.51779e-14	3.19334e-12	193.531	149.106	177.613	164.088	561.294	199.081	456.787	122.693	159.86	94.6664	196.406	167.127	427.906	187.068	149.929	152.697
H2-Aa	3043.46	3.49788	0.467765	7.47785	7.55484e-14	3.20045e-12	708.036	2693.74	4648.76	5900.39	663.428	4841.15	305.787	3692.62	3567.34	6204.88	2978.66	1805.31	213.116	3809.15	3408.43	3254.51
Msr1	233.581	3.51228	0.469798	7.47614	7.65366e-14	3.22834e-12	109.735	139.057	254.956	253.245	54.6584	247.825	13.4203	550.762	332.967	436.386	139.342	491.999	27.785	317.466	208.797	158.89
P4hb	29536.7	-1.75496	0.234746	-7.476	7.66165e-14	3.22834e-12	24284.4	23409.5	20033.6	18049.3	59429.8	27098.1	59519	20147.4	16210.8	11663.8	31723	18794.8	69490.2	25032.5	22838.2	24862.8
Figf	347.262	2.66213	0.357748	7.44136	9.96576e-14	4.18801e-12	221.815	477.215	445.717	534.002	125.619	321.198	33.997	368.079	540.466	433.097	304.454	527.079	64.6417	356.774	434.239	367.794
Mettl9	782.354	-1.02091	0.13728	-7.43667	1.03255e-13	4.32767e-12	599.502	676.454	660.357	696.755	1259.62	633.709	1485.18	549.145	636.335	658.504	639.501	743.714	1118.93	706.93	748.821	704.201
Cfp	559.271	2.86328	0.385367	7.43	1.08596e-13	4.53085e-12	142.383	506.938	834.308	959.226	166.894	927.977	94.5677	1076.37	644.407	388.95	619.726	694.734	102.105	836.878	462.179	490.697
Cttnbp2nl	562.056	1.90975	0.257036	7.4299	1.08678e-13	4.53085e-12	571.998	581.353	644.32	700.611	224.899	561.939	156.056	845.985	688.546	1111.28	409.458	593.661	194.492	545.405	587.758	575.133
Il1rl2	208.65	2.73332	0.367929	7.42892	1.09486e-13	4.55249e-12	89.9947	238.912	260.752	395.345	50.5293	158.444	47.7716	317.273	333.772	427.103	106.163	183.804	48.8395	186.774	236.896	256.026
Plbd1	417.391	3.80996	0.512915	7.42805	1.10214e-13	4.57068e-12	55.2034	423.123	604.682	689.771	54.9318	671.832	37.1661	482.626	536.863	864.978	347.987	520.918	31.659	590.931	436.58	329.004
Pzp	154.422	5.42104	0.730073	7.42534	1.12494e-13	4.65299e-12	62.7105	138.375	250.466	355.609	15.6396	107.235	0	166.271	262.519	518.619	60.8573	119.852	2.62897	126.767	140.154	143.044
Pld1	927.939	1.32269	0.178344	7.41652	1.20242e-13	4.96044e-12	684.122	1031.63	1068.28	1065.85	424.625	956.009	460.727	928.965	1104.09	1483.59	714.956	1115.78	364.309	980.03	1268.05	1196.01
Frrs1	148.955	2.24936	0.303329	7.41556	1.21112e-13	4.9833e-12	160.164	188.699	166.683	175.632	26.3518	204.994	34.9454	133.503	150.548	229.384	155.586	198.045	37.2092	200.503	144.986	176.05
Plekha2	632.864	1.87483	0.253305	7.40148	1.34672e-13	5.52681e-12	372.765	652.093	799.509	797.534	209.417	682.889	265.093	982.774	724.014	1036.73	653.02	700.855	202.196	775.982	563.406	707.536
Mccc1	398.945	-1.60218	0.216502	-7.40031	1.35868e-13	5.56141e-12	301.419	328.539	288.736	318.281	711.499	342.972	863.651	197.822	291.783	202.857	372.106	340.103	916.942	276.984	290.796	338.627
C1s1	3492.99	2.16971	0.293237	7.39919	1.37017e-13	5.59393e-12	1748.36	4666.12	4368.46	5128.29	1238.56	2932.62	848.886	3762.93	5506.49	6288.9	3196.35	3571.14	1040.25	3779.59	4304.62	3506.36
Itm2a	2496.27	3.13749	0.424067	7.39856	1.3767e-13	5.60605e-12	431.552	2426.98	3642.44	4243.2	677.242	2000.67	242.122	4662.87	3783.87	4566.35	1940.98	2456.76	473.089	2433.95	3118.03	2840.16
Ccr5	578.039	3.88182	0.524941	7.39476	1.41662e-13	5.75373e-12	76.1519	574.768	830.891	974.297	31.3237	1010.31	56.6466	716.2	867.587	1135.46	241.326	977.635	87.4363	677.309	577.529	413.757
Itga5	690.504	1.78048	0.240849	7.39251	1.44079e-13	5.83687e-12	579.482	708.465	803.359	907.843	231.896	669.189	257.099	1482.58	890.87	765.654	609.922	617.533	403.986	738.969	688.685	692.524
Mboat1	377.963	3.47749	0.470794	7.38644	1.50815e-13	6.09408e-12	906.359	282.161	424.644	425.475	46.7512	400.354	41.953	768.665	437.941	658.89	218.099	403.759	50.1731	370.239	347.304	264.637
Mertk	349.947	1.74167	0.236048	7.37847	1.60119e-13	6.45349e-12	303.207	273.81	491.145	559.484	173.672	273.097	127.118	474.414	560.255	474.469	258.875	466.865	167.913	356.053	330.686	308.093
Ezr	1501.51	1.95018	0.264411	7.37555	1.63665e-13	6.5796e-12	2666.66	1457.71	1527.49	1653.94	454.944	1896.74	485.733	2502.18	1771.08	1859.31	1262.19	1524.38	506.59	1833.8	1353.15	1268.35
Cdh6	267.874	3.15479	0.427796	7.37451	1.64947e-13	6.61423e-12	145.705	197.966	296.933	483.194	44.7981	154.731	42.4337	423.209	399.65	956.547	124.232	228.128	47.8404	165.364	323.748	251.5
Ncf1	430.628	3.03835	0.412064	7.37349	1.66219e-13	6.64834e-12	140.443	355.904	588.47	656.599	140.152	530.647	49.526	782.516	531.378	608.572	446.337	703.989	50.8388	633.563	369.751	301.354
Kctd12	1586.98	2.00499	0.272053	7.36984	1.7083e-13	6.79824e-12	709.615	1474.21	2204.23	2679.83	558.659	1933.65	514.197	1447.45	2142.59	2770.81	1258.89	1984.63	510.298	1827.27	1810.68	1564.69
Selplg	204.025	4.14921	0.562981	7.37007	1.70532e-13	6.79824e-12	41.1532	262.831	265.054	293.544	26.3518	343.957	7.48831	386.996	288.679	216.901	263.846	200.552	18.6046	359.666	154.048	134.732
Ccdc80	2562.82	2.90927	0.394772	7.36949	1.7128e-13	6.79901e-12	744.103	3416.1	3511.12	3747.31	649.459	1818.71	529.763	5241.06	3885.25	4907.06	1789.4	2971.79	456.858	2459.31	2776.96	2100.87
B4galt4	582.329	-1.6947	0.229988	-7.36866	1.72349e-13	6.82423e-12	445.773	398.126	378.586	356.706	878.255	599.797	1629.12	288.185	407.408	343.999	527.304	554.591	962.326	568.99	461.303	516.787
Asb8	458.602	-1.07015	0.145462	-7.35689	1.88248e-13	7.43507e-12	378.908	417.856	409.33	376.284	880.998	425.307	737.927	327.619	382.616	291.03	447.853	382.994	732.996	414.225	363.671	368.015
F13a1	2409.7	2.57172	0.349642	7.35529	1.90516e-13	7.50586e-12	550.083	2011.43	3450.55	4321.72	826.5	2587.78	535.5	3541.34	4431.36	2940.95	1761.53	4275.58	624.479	2869.84	2057.08	1769.48
Dusp6	341.79	2.19096	0.297995	7.35233	1.94782e-13	7.65477e-12	305.868	403.513	299.666	401.562	126.489	432.657	87.3636	554.01	433.018	562.797	380.98	403.611	63.7872	336.928	367.408	308.986
Maf	762.804	2.28677	0.311681	7.3369	2.18592e-13	8.56912e-12	423.513	774.86	952.096	1110.41	307.168	731.663	147.934	972.228	1194.17	1308.13	637.769	1167.75	195.858	939.539	674.461	667.31
2020-03-02	1175.32	-1.24698	0.170048	-7.33311	2.24869e-13	8.79335e-12	1416.65	898.795	822.089	835.212	2113.23	1006.83	1900.89	903.841	949.379	687.651	1119.89	964.497	2236.71	1116.36	940.393	892.747
Serpinb6b	435.484	3.18468	0.434535	7.32894	2.31983e-13	9.04907e-12	179.023	367.618	531.375	435.29	88.8255	541.19	49.6363	557.149	687.134	1326.62	253.094	670.672	44.0148	413.251	470.705	352.138
Rnf150	273.217	2.65553	0.36269	7.32177	2.44722e-13	9.5224e-12	123.46	290.631	379.819	319.93	84.3258	307.492	42.4337	364.836	422.154	558.116	194.631	389.405	50.4982	294.554	284.206	264.974
Fam84a	135.266	4.31364	0.589339	7.31944	2.49002e-13	9.66506e-12	121.235	191.227	141.18	293.544	15.8111	76.8729	12.4805	372.943	153.652	283.479	101.161	118.66	7.97341	83.7153	100.502	89.8215
Slc4a11	157.974	6.88474	0.941623	7.31156	2.64062e-13	1.02244e-11	136.359	216.729	207.669	285.932	0	160.683	6.81293	489.077	186.68	241.801	127.766	163.441	0	124.191	74.8232	105.621
Fam83f	195.251	-1.86547	0.255417	-7.30362	2.80137e-13	1.08203e-11	160.164	176.063	112.033	117.088	313.587	195.139	491.732	93.506	121.835	85.3038	198.18	139.551	406.644	193.269	157.343	162.577
Serpina3g	108.31	5.11459	0.700583	7.30049	2.86732e-13	1.10479e-11	88.864	85.603	151.287	206.862	6.03722	75.7034	4.76813	209.605	119.894	271.17	76.6864	141.249	4.05936	141.693	60.2452	89.2286
Erp44	2012.66	-1.21778	0.166837	-7.29919	2.89516e-13	1.1128e-11	1673.14	1425.62	1535.62	1792.49	4242.03	1785.38	3545.3	1698.01	1469.87	1145.04	1858.5	1461.95	3547.08	1737.14	1571.68	1713.68
Sdc3	1246.96	2.86737	0.393007	7.29597	2.9651e-13	1.13691e-11	329.001	1505.27	1753.77	1797.81	303.448	1531.22	148.672	1848.9	1510.26	1745.55	1618.77	1510.71	258.562	1688.28	1222.98	1178.16
Akna	205.978	2.45588	0.336703	7.29391	3.01078e-13	1.14884e-11	143.48	263.674	224.066	307.562	39.5277	258.214	47.4259	278.356	252.982	305.845	237.816	217.265	58.4716	317.291	192.766	150.9
Sec63	2838	-1.03213	0.141504	-7.29398	3.00923e-13	1.14884e-11	2869.93	2075.1	2367.5	2346.08	5393.72	2247.4	4495.96	2180.15	2295.3	2274.01	2448.84	2618.23	4209.35	2409.36	2784.03	2393.07
Ubash3b	157.25	2.69007	0.36894	7.29135	3.06874e-13	1.16812e-11	56.7012	160.38	209.734	249.853	35.6607	183.117	43.4297	213.661	265.477	196.827	108.648	191.82	30.8287	270.172	175.768	123.93
Hmga2	75.9185	5.13916	0.705422	7.28524	3.21102e-13	1.21934e-11	91.2097	79.191	119.327	180.889	8.1741	39.4243	4.9925	171.888	143.572	89.5231	49.9223	62.6899	0	46.5112	62.6114	64.7706
Fhl2	192.851	3.76172	0.516398	7.28454	3.22768e-13	1.22272e-11	83.4368	264.492	222.353	317.956	44.1801	190.017	12.4141	472.982	288.535	356.535	104.141	171.04	21.3159	207.93	157.001	171.291
Tspan5	441.493	-0.9418	0.129309	-7.28331	3.25736e-13	1.231e-11	444.538	376.075	363.974	358.377	689.502	382.761	662.29	304.835	380.665	384.17	387.619	440.318	671.053	440.168	379.624	397.917
Fbln2	3200.62	2.06437	0.283588	7.27945	3.35179e-13	1.26366e-11	2078.15	4239.97	3839.02	4008.97	1314.85	3027.25	752.75	6901.4	4275.13	3867.31	2902.58	3189.41	1347.47	3632.37	2754.48	3078.83
Rap2a	535.355	1.79965	0.247259	7.27839	3.37836e-13	1.27063e-11	427.103	574.522	572.917	728.089	210.815	539.096	147.27	848.581	703.849	892.569	444.279	608.341	257.807	529.164	538.756	542.522
Cpxm1	575.265	2.78172	0.382345	7.27542	3.45347e-13	1.29579e-11	272.747	683.738	931.176	1201.81	227.536	381.635	94.832	1349.68	554.808	860.517	490.373	536.82	119.334	442.631	529.209	527.387
Pilra	151.501	4.6167	0.634653	7.27438	3.48021e-13	1.30101e-11	14.8801	127.246	198.232	236.746	5.61312	255.764	2.65843	361.083	199.165	193.306	81.9702	208.227	19.8562	189.543	167.501	162.232
Tax1bp3	650.38	1.65275	0.227205	7.27424	3.48389e-13	1.30101e-11	631.895	611.273	795.477	781.953	289.192	709.463	227.846	1269.09	750.317	834.258	584.527	686.905	342.275	721.562	579.383	590.662
Taok3	673.51	0.943289	0.129709	7.27235	3.53275e-13	1.31614e-11	634.175	681.727	687.71	720.523	387.723	765.324	367.837	708.637	801.87	884.046	693.146	825.691	383.65	752.807	730.437	750.862
Rps3a2	167.96	22.5796	3.11029	7.25967	3.88044e-13	1.44226e-11	8.89799	8.42408	3.64335	0	0	13.7977	0	2.16199	2621.39	0	5.91583	4.17817	0	0	18.9471	0
Ptprc	1034.9	3.2439	0.446888	7.25887	3.90342e-13	1.44739e-11	250.422	1110.2	1292.09	1319.82	187.944	1625.69	64.341	741.292	1328.07	2444.9	699.635	1580.42	120.461	1594.66	1219	979.492
Fuom	160.522	-1.84105	0.253888	-7.25144	4.1235e-13	1.5254e-11	131.117	135.661	108.776	73.1937	354.428	138.826	378.302	121.291	92.9687	60.8317	189.99	114.903	337.337	121.774	94.323	114.629
H2-Ab1	1970.59	3.61354	0.498552	7.24807	4.22739e-13	1.56018e-11	291.962	1566.67	3094.35	3832.46	412.16	3113.13	161.803	2607.17	2391.72	4369.9	1677.72	1325.93	155.887	2417.87	2106.32	2004.35
Vill	815.481	1.44526	0.199452	7.24616	4.28767e-13	1.57873e-11	722.941	979.027	915.324	956.377	346.052	960.193	333.392	1240.03	825.054	697.027	1071.92	884.891	408.36	884.153	847.066	975.879
Wdfy3	1114.28	1.13919	0.157272	7.2434	4.37577e-13	1.60741e-11	1078.18	1331.39	1302.6	1469.96	595.622	1144.77	574.305	1062.32	1372.12	1407.24	989.282	1108.28	602.673	1310.4	1266.35	1213.01
Mrps14	388.76	-1.0462	0.144446	-7.24287	4.39281e-13	1.60991e-11	336.415	310.017	315.756	260.533	678.625	382.183	593.909	353.876	309.988	297.223	363.848	330.669	652.777	385.792	322.43	326.117
Immp1l	323.291	-1.25435	0.173254	-7.23995	4.48839e-13	1.64113e-11	216.888	240.086	259.589	257.263	685.147	240.474	541.654	215.118	270.055	250.19	284.552	320.883	563.454	265.615	304.801	256.89
Col1a2	21811.3	3.26805	0.451453	7.23896	4.52149e-13	1.6494e-11	4005.13	29648	29404.7	36795.1	4303.81	17469.6	2311.31	53077.4	27961	35084.4	20378	17614.8	4848.35	21178.7	22150.2	22751
Glipr2	266.602	2.83175	0.391262	7.23748	4.5709e-13	1.66358e-11	70.1473	243.275	310.403	365.849	55.3986	306.422	41.4274	531.655	346.887	489.19	222.551	299.568	67.6371	292.748	326.311	296.163
Lix1l	369.111	2.09806	0.289967	7.2355	4.6381e-13	1.68414e-11	349.246	412.78	411.699	489.79	129.124	306.506	117.317	691.836	509.068	729.764	244.324	309.184	122.259	315.224	391.298	376.352
Adi1	898.323	-1.20313	0.166378	-7.2313	4.78379e-13	1.73305e-11	889.697	750.019	728.587	720.389	1355.63	878.982	1563.76	487.116	652.196	680.66	839.694	740.891	1543.36	831.415	827.182	883.597
Bmp3	324.416	-3.07172	0.424884	-7.22955	4.84593e-13	1.75154e-11	175.735	166.797	139.358	134.404	1072.52	166.558	1013.42	41.6183	173.828	69.1793	320.638	134.537	991.36	186.034	183.704	220.961
Reg3d	20205	-2.87709	0.398053	-7.22791	4.90494e-13	1.76881e-11	14052.1	11753.3	12190.7	8880.54	62005.8	14767.5	82910.5	3619.17	6894.15	4965.31	16858.3	15961.4	29105.6	14411.4	12926	11977.7
Mcfd2	5006.99	-1.83538	0.254112	-7.22272	5.09583e-13	1.83345e-11	4403.01	3587.22	3756.34	3416.39	10450.8	4111.06	11373.6	1802.1	3018.62	2176.92	5734.79	4075.57	10269.2	4599.12	3481.27	3855.87
Pira2	114.653	4.44346	0.615405	7.22039	5.184e-13	1.86092e-11	34.4288	65.5812	124.795	181.737	8.54784	221.797	4.04835	99.0576	169.122	170.237	102.784	195.212	7.71982	228.994	127.849	92.5377
Rhoj	573.334	1.69043	0.234153	7.21935	5.22373e-13	1.87093e-11	541.853	587.012	692.141	662.898	344.238	609.499	178.675	1048.4	795.919	676.323	507.897	421.647	224.255	563.039	634.594	684.963
Zfp608	197.049	1.94039	0.26884	7.21765	5.28921e-13	1.89008e-11	184.633	238.401	213.136	265.509	55.3388	192.182	52.4181	212.415	266.95	313.127	153.812	160.442	79.7341	235.643	278.44	250.602
Creb3l4	82.0027	2.93464	0.407031	7.20986	5.60083e-13	1.99691e-11	75.0967	78.5083	133.245	107.971	8.08737	46.378	12.7675	149.291	150.835	115.873	53.8618	54.7105	32.6271	72.9532	97.6278	122.21
Sec61g	1558.7	-1.39562	0.193656	-7.20669	5.73291e-13	2.03939e-11	1031.8	1114.82	1270.78	1123.51	3113.06	1368.47	3176.65	1066.5	1082.83	832.833	1448.95	1450.68	2673.93	1337.88	1396	1450.5
Gm21541	63.174	19.9651	2.77129	7.20425	5.83622e-13	2.07146e-11	0	0	162.129	110.491	0	20.6966	0	187.553	0	191.934	148.487	0.835633	0	110.587	0.823786	77.2465
Pcbd1	1817.5	-2.02085	0.280527	-7.20375	5.85767e-13	2.07441e-11	915.381	1356.28	1339.84	1048.02	4550.96	1471.43	4243.37	714.537	1108.15	723.002	1806.7	1382.14	4015.94	1419.03	1466.34	1518.88
Napsa	124.169	6.21115	0.863008	7.19709	6.15091e-13	2.17337e-11	90.0361	112.227	182.964	168.239	2.63354	206.97	2.49455	205.801	210.718	182.023	89.3623	140.453	2.65615	141.505	121.15	127.467
Cdkn1c	394.454	3.44493	0.478833	7.19441	6.27294e-13	2.21153e-11	112.498	409.989	346.013	499.419	90.0049	391.435	14.93	842.29	753.648	531.813	420.767	369.203	63.8441	452.75	511.474	501.184
Tlr8	247.902	3.55833	0.494756	7.19209	6.38055e-13	2.24444e-11	83.9279	218.064	451.805	475.033	49.1466	281.279	25.2665	180.547	279.93	447.764	218.331	461.736	17.1203	299.002	292.243	185.242
Cmtm3	472.802	2.25442	0.313602	7.18879	6.53667e-13	2.29424e-11	193.531	546.723	520.088	692.632	158.111	539.096	104.836	829.123	624.695	693.874	437.772	503.887	156.81	571.538	511.571	480.545
Psmd6	972.491	-1.23191	0.171401	-7.18727	6.60974e-13	2.31473e-11	816.118	590.527	821.794	809.876	2043.19	763.777	1830.16	656.34	774.772	711.2	905.575	883.569	1518.12	789.712	852.807	792.326
BC031181	549.105	-0.839379	0.116818	-7.18538	6.70203e-13	2.33667e-11	448.236	414.465	461.795	503.808	898.597	479.963	856.163	516.175	451.643	460.328	515.861	503.051	842.523	476.454	476.972	479.647
Zmiz1	1679.37	1.24831	0.173727	7.18548	6.69723e-13	2.33667e-11	2849.44	2119.99	1702.45	2016.97	717.47	1806.79	840.604	1894.01	2124.06	1723.02	1748.38	1485.87	884.585	1637.84	1569.14	1749.29
mt-Nd2	15678.3	-1.31039	0.182402	-7.18404	6.7681e-13	2.34931e-11	7274.11	9377.69	9976.4	12234.9	35145.4	12116.4	32307.1	15762.5	12982.8	14237.4	11333	12236.2	27335.5	10848.9	14806.7	12878.6
Vim	4082.41	1.987	0.276579	7.1842	6.76009e-13	2.34931e-11	2039.78	4447.37	5290.15	6017.85	1944.06	3615.11	1014.99	7849.86	5967.76	5638.74	3397.01	3912.47	1795.3	4385.97	4369.49	3632.68
Myo1f	347.598	3.12598	0.435314	7.18097	6.92161e-13	2.39731e-11	70.0262	410.427	413.882	434.799	56.3867	604.803	47.8261	492.55	465.378	497.397	311.9	430.84	50.9243	600.643	348.091	325.696
Psph	151.494	-2.27844	0.317577	-7.17445	7.25967e-13	2.50888e-11	98.1178	78.1973	93.2923	68.9104	320.85	114.359	614.762	81.955	90.73	52.803	106.92	86.6285	281.738	152.051	79.6941	102.893
Gamt	1483.24	-2.88329	0.401911	-7.17395	7.28621e-13	2.51255e-11	1103.39	1251.11	753.885	576.322	3475.43	1453.35	4251.74	418.902	408.53	227.098	1676.78	708.078	4208.06	1329.2	754.226	1135.75
Nfe2l3	195.445	3.43267	0.478911	7.16766	7.62893e-13	2.62499e-11	102.293	228.755	276.082	329.971	25.3706	90.4914	26.4348	476.419	284.324	556.986	116.964	123.571	43.9439	59.7024	192.111	193.709
Rchy1	932.624	-1.30949	0.182733	-7.16615	7.71352e-13	2.64831e-11	1151.89	785.774	719.295	706.352	1537.09	792.073	1673.3	499.591	654.157	663.309	820.432	877.643	1579.44	744.857	839.945	876.837
Atp5g3	1641.02	-0.852923	0.119094	-7.16178	7.96362e-13	2.72382e-11	1414.2	1211.24	1431.64	1385.17	2955.85	1450.11	2505	1660.89	1426.73	1253.51	1475.86	1479.01	2542.41	1366.75	1280.56	1417.48
Nynrin	273.143	2.06478	0.288309	7.1617	7.96804e-13	2.72382e-11	194.989	407.274	297.514	339.343	78.9679	250.052	74.8001	430.839	440.29	316.417	225.734	245.404	117.207	282.871	315.983	352.608
Bin2	110.262	5.62967	0.786894	7.15429	8.41051e-13	2.86886e-11	39.4682	136.169	148.266	129.533	1.81739	166.027	0	250.509	122.357	207.332	60.2206	167.225	7.3323	147.4	97.5596	82.9792
F10	124.539	5.70298	0.797868	7.14777	8.81965e-13	3.00192e-11	39.1352	68.6236	144.351	311.089	7.82053	360.643	0	289.783	120.307	117.359	82.4603	115.12	3.79874	138.77	96.5596	96.8125
Actn4	3008.68	0.880708	0.123225	7.14713	8.861e-13	3.0095e-11	3797.4	3458.09	3743.97	3425.09	1792.16	3144.3	1877.11	2969.97	3374.03	3265.86	2911.79	3031.95	1831.94	3445.27	2960.17	3109.71
Cela2a	594021	-4.3191	0.604853	-7.14075	9.28238e-13	3.14583e-11	202227	347155	170878	116337	1.91825e+06	449062	1.97952e+06	47861.8	89394.5	22174.2	732939	130256	2.45688e+06	375019	183550	282837
Pkib	60.271	3.95359	0.55384	7.13852	9.43442e-13	3.19049e-11	14.0806	61.2371	99.5541	93.3948	5.98198	90.7127	9.15329	137.021	135.952	85.4111	51.4805	58.915	7.43308	50.658	39.118	24.2332
Nkd2	190.741	4.67775	0.655324	7.13808	9.46424e-13	3.19251e-11	39.315	171.218	267.318	372.733	20.319	157.327	21.1753	663.172	284.969	506.841	76.6919	139.336	5.12335	97.9063	117.955	110.452
Tspan1	450.987	1.83575	0.257186	7.13784	9.48091e-13	3.19251e-11	361.85	565.997	477.684	387.156	77.7185	777.956	168.885	436.827	379.106	355.731	414.025	843.731	106.051	826.047	491.629	545.398
Tm6sf1	281.172	1.85782	0.260727	7.12553	1.03679e-12	3.48373e-11	125.168	233.956	410.126	462.599	134.988	341.699	96.5126	338.555	410.985	330.872	227.043	401.565	105.826	344.587	305.058	229.217
Dusp4	100.458	4.80892	0.674945	7.12491	1.04152e-12	3.49218e-11	141.256	117.937	129.339	119.562	2.63518	99.5406	2.4961	218.361	114.075	191.934	85.188	91.9197	10.6312	66.1455	111.211	105.091
Commd3	796.742	-0.887128	0.124522	-7.12428	1.04625e-12	3.5006e-11	730.396	668.469	679.779	608.641	1211.01	746.824	1138.78	605.768	626.501	716.972	670.984	945.972	1144.59	760.089	813.026	680.075
Slc35b1	984.8	-1.48904	0.209035	-7.12341	1.0529e-12	3.5154e-11	870.424	711.385	708.908	723.949	1707.49	797.009	2246.71	581.677	725.374	503.56	868.076	784.865	1810.99	867.358	873.893	975.14
Enc1	877.398	1.25184	0.175787	7.12135	1.06873e-12	3.5607e-11	913.156	850.832	896.264	1041.42	503.32	892.909	309.517	1084.78	1054.61	1293.08	808.103	1025.32	473.089	890.897	1005.84	995.223
Cox16	278.189	-1.27285	0.178776	-7.11983	1.08058e-12	3.59258e-11	275.15	198.101	176.672	203.497	575.541	238.659	448.56	231.744	204.534	222.506	239.921	309.966	460.997	250.718	195.546	218.904
Ptp4a3	105.434	-2.87774	0.404282	-7.11816	1.09375e-12	3.62871e-11	100.949	134.036	37.011	26.714	208.192	122.112	207.756	18.5972	44.8923	29.0933	76.7559	82.5298	281.63	148.902	84.9817	82.7998
G6pdx	678.143	1.21167	0.170281	7.11576	1.113e-12	3.68483e-11	608.052	563.756	767.467	945.471	338.52	715.405	465.309	892.336	806.504	902.512	533.685	754.657	297.502	782.294	799.16	677.655
Anxa1	1473.06	2.19814	0.309057	7.11242	1.14026e-12	3.76715e-11	1344.38	1114.51	2354.46	2062.59	517.357	1245.63	400.574	2979.21	2002.3	2590.38	904.41	1891	620.866	1298.69	1255.59	986.964
Acacb	690.645	-2.83739	0.398999	-7.11127	1.1498e-12	3.79072e-11	602.859	776.62	276.526	214.23	1174.82	707.64	1868.75	148.965	258.137	151.731	857.49	343.753	1765.69	693.53	557.589	651.993
St6gal1	796.222	2.14385	0.301514	7.11028	1.15806e-12	3.80998e-11	435.692	1029.71	932.305	1086.53	177.58	963.739	277.371	1262.55	1103.84	1373.64	558.322	787.603	295.339	749.176	857.455	848.707
Panx1	126.094	2.89142	0.40719	7.10091	1.23942e-12	4.06918e-11	39.3152	103.842	218.428	207.652	25.6854	112.451	23.6556	253.383	154.027	217.468	76.8438	148.544	35.7061	140.672	130.383	129.455
Ppp1r18	414.806	2.40288	0.338492	7.09877	1.25874e-12	4.124e-11	226.539	525.18	500.576	537.921	129.32	478.438	73.6479	888.091	511.691	527.503	394.72	460.101	145.025	570.666	381.809	285.667
Adcy2	86.8387	3.27257	0.461024	7.09847	1.26147e-12	4.12438e-11	33.3675	69.0775	128.428	187.176	18.4463	81.8007	7.48831	145.394	142.787	171.128	54.4257	82.7277	21.2624	71.3131	85.6737	88.9233
Arfip2	1186.43	-1.29645	0.182836	-7.09079	1.33348e-12	4.3508e-11	1191.52	1131.78	873.788	873.002	1800.71	1054.74	2335.87	743.259	887.333	672.876	1487.74	804.25	2083.96	1098.28	943.809	999.969
Thy1	952.092	3.64304	0.514038	7.0871	1.36949e-12	4.45905e-11	145.705	1101.87	1300.68	1690.35	205.544	605.128	59.9065	2805.72	1495.39	1823.11	577.977	749.563	172.757	701.762	906.988	891.03
Ms4a6c	588.584	3.28893	0.464109	7.08655	1.37496e-12	4.46762e-11	175.097	387.904	789.138	1036.45	164.207	456.572	51.4629	1045.45	902.262	1089.15	501.084	1209.79	74.5825	702.916	430.257	401.002
Mgat5	408.711	1.97261	0.278381	7.086	1.38041e-12	4.4761e-11	354.27	533.774	474.098	554.538	100.755	386.207	122.356	648.423	499.974	694.198	385.322	430.97	193.971	376.925	408.417	375.181
Cd97	788.842	1.77844	0.250996	7.08555	1.3849e-12	4.48144e-11	617.671	932.151	873.451	1179.34	399.342	895.967	192.45	1027.63	1057.39	1000.91	695.384	844.66	317.506	1160.5	656.702	770.419
Ms4a6d	354.861	3.46992	0.489775	7.08473	1.39316e-12	4.49893e-11	128.967	270.797	474.476	659.695	92.1258	237.094	22.836	758.084	593.836	596.214	319.134	655.706	60.9913	321.208	255.557	231.056
Sulf2	2305.38	2.136	0.301526	7.08396	1.40088e-12	4.51463e-11	1420.77	2945.92	3028.81	3296.1	816.665	2441.75	987.716	3162.94	3058.42	2523.26	3098.05	2484.06	337.976	2461.62	2485.41	2336.67
Fam20a	155.844	3.17146	0.447791	7.08246	1.41621e-12	4.55472e-11	113.03	104.569	172.489	282.471	36.9985	113.282	28.0366	415.853	372.533	293.639	69.7478	112.912	37.3161	96.2451	123.379	121.005
Pfkp	444.509	1.60469	0.226663	7.07961	1.44565e-12	4.63993e-11	453.081	409.419	508.472	626.329	187.669	518.695	183.586	726.124	531.154	587.508	337.812	559.263	217.61	514.355	417.968	333.094
Fam111a	383.169	2.45694	0.347203	7.07639	1.47953e-12	4.739e-11	91.8503	289.867	444.394	483.027	100.925	554.876	86.7056	523.917	545.483	654.036	327.322	551.331	85.2207	491.246	532.063	368.442
Csf3r	150.921	4.10955	0.581056	7.07256	1.52102e-12	4.86201e-11	45.5731	212.78	208.002	143.86	13.0281	151.573	12.3634	215.823	221.631	252.388	150.648	208.697	9.07753	322.045	117.787	129.467
Dnajb11	3358.85	-1.59105	0.225042	-7.07002	1.54906e-12	4.94164e-11	2935.03	2359.27	2636.19	2652.2	7457.95	2767.1	7539.74	1570.19	2218.54	1721.69	3246.79	2720.74	5507.08	2798.27	2822.83	2787.94
Rdh10	507.926	2.43825	0.344956	7.06831	1.5683e-12	4.98546e-11	323.715	459.552	536.773	592.791	124.053	500.04	175.716	1099.97	645.392	1164.56	361.272	501.196	98.9589	527.984	530.995	483.847
Rpl36al	2548.97	-1.30326	0.184382	-7.06824	1.56913e-12	4.98546e-11	2512.79	1834.56	2133.27	1673.65	5130.14	2213.98	4530.36	2273.6	1726.05	1348.73	2426.93	1920.14	4791.01	2198.88	1999.37	2070.02
Srsf6	4564.51	-1.28679	0.182077	-7.06725	1.58029e-12	5.01083e-11	3584.75	3771.84	3592.46	3166.1	8521.26	4201.97	7977.76	2652.5	3105.97	3122.02	4587.1	4562.29	6401.16	4237.75	4487.6	5059.6
Inpp5d	504.97	2.73116	0.386519	7.06603	1.59429e-12	5.04507e-11	287.536	507.89	778.85	942.264	102.996	418.579	57.8967	649.971	635.981	868.015	415.249	811.58	190.379	593.315	415.08	403.939
Adam12	548.278	3.27613	0.463733	7.06469	1.60974e-12	5.08374e-11	78.1602	531.388	778.622	1053.21	148.144	410.872	36.465	1006.8	864.025	823.578	388.187	610.707	98.4913	597.997	651.482	694.316
Ednra	388.395	3.53016	0.499735	7.06406	1.61708e-12	5.0967e-11	104.016	444.105	529.931	662.561	57.834	262.02	37.3511	758.618	580.066	1097.47	136.596	409.65	69.4078	362.14	345.781	356.782
Agtpbp1	986.791	-2.03709	0.288529	-7.06025	1.66197e-12	5.22776e-11	544.939	945.372	729.247	592.62	1984.02	988.792	2154.29	337.788	449.271	484.874	935.148	722.073	2345.47	856.874	784.516	933.361
Cxcr4	146.029	2.73502	0.387417	7.05962	1.66962e-12	5.24135e-11	102.408	155.127	211.337	208.021	48.526	148.818	13.7895	124.441	241.503	242.331	151.424	133.875	29.3655	171.288	198.724	155.479
Cgref1	154.924	-2.21526	0.313962	-7.0558	1.71606e-12	5.37642e-11	172.399	101.931	90.1729	80.8071	329.398	111.367	491.732	95.668	59.7534	48.3735	165.643	88.5771	316.278	135.391	79.9072	111.379
Itpripl1	181.312	1.78965	0.25387	7.04946	1.79609e-12	5.61599e-11	142.547	203.634	248.272	249.203	57.8212	199.787	70.262	205.511	226.302	248.994	138.304	200.767	73.706	255.197	194.227	186.462
Cd48	180.747	3.3027	0.468685	7.04675	1.8315e-12	5.71537e-11	41.0546	145.387	211.717	245.954	15.7732	229.665	29.8815	238.11	255.473	379.422	151.673	280.1	26.5143	286.631	197.908	156.689
Susd1	169.317	2.66113	0.377844	7.04294	1.88229e-12	5.86226e-11	90.8547	181.876	261.091	267.478	34.8543	173.427	16.4381	212.915	207.971	218.569	158.423	262.985	71.883	190.777	171.164	188.367
Tenm3	235.607	2.59836	0.369033	7.04102	1.90843e-12	5.93195e-11	175.851	214.243	311.607	480.106	50.8089	119.288	43.3146	318.19	414.276	568.971	103.745	141.069	101.882	137.635	315.362	273.367
Plac8	545.915	2.7624	0.392755	7.03338	2.01586e-12	6.25355e-11	492.616	672.02	749.147	697.322	155.806	276.522	62.4033	1065.79	736.619	1084.77	559.724	666.545	141.559	505.531	439.433	428.844
Srgn	391.61	1.81405	0.258006	7.03103	2.05016e-12	6.34743e-11	314.929	336.785	507.37	585.951	205.384	528.393	98.567	633.071	448.281	544.997	343.228	447.367	161.288	458.037	337.855	314.259
Saraf	2171.39	-1.40887	0.200491	-7.02709	2.10881e-12	6.51621e-11	2409.13	1775.8	1841.71	1508.12	4026.56	1915.91	4008.74	1162.61	1486.85	1186.45	2332.02	1584.36	3906.97	1851.04	1774.43	1971.58
Tubb2a	409.243	2.16123	0.307869	7.01996	2.21929e-12	6.8442e-11	204.654	465.009	468.171	549.983	134.394	496.717	112.325	811.827	462.507	402.072	521.776	423.666	138.206	521.929	395.417	439.227
Plat	552.972	1.85596	0.264529	7.01609	2.28166e-12	7.02279e-11	474.93	796.076	547.413	567.299	210.815	727.336	147.27	933.439	599.087	526.907	457.885	700.261	191.362	707.963	713.398	546.115
Col1a1	14242.1	3.52265	0.502517	7.01001	2.38299e-12	7.32037e-11	1629.01	21345.5	22219	26338.1	2304.19	11409	1254.98	30004	18703.9	19989.1	10799.4	12377.3	2788.76	15601.7	14499.4	16611.1
Ormdl3	891.686	-1.40293	0.200196	-7.00778	2.42137e-12	7.42379e-11	1002.14	830.614	604.796	645.632	1560.03	886.995	1644.93	617.788	571.926	409.874	1140.57	594.971	1634.55	803.047	600.54	718.572
Sh3kbp1	307.106	2.66156	0.380156	7.00124	2.53712e-12	7.7636e-11	113.122	277.007	463.95	467.886	118.701	332.328	34.9342	495.842	411.552	505.183	240.995	475.717	69.7045	366.404	296.838	243.525
Itgax	234.748	4.7582	0.679653	7.00092	2.54288e-12	7.76612e-11	20.0205	225.765	359.781	423.825	34.2574	301.578	2.4961	425.912	395.77	526.907	183.982	179.661	7.97341	218.073	219.127	230.841
Smim14	2380.81	-1.54188	0.220378	-6.99653	2.62376e-12	7.99764e-11	1880.96	2108.01	1893.35	1776.52	4796.56	2254.69	4491.76	1199.62	1526.48	1109.06	2459.77	1788.96	4674.55	2109.85	1944.6	2078.24
Samsn1	92.3503	4.41626	0.631479	6.99352	2.6807e-12	8.15543e-11	45.6009	88.4503	165.768	159.136	10.5404	87.7115	4.99206	131.937	135.023	164.881	49.6916	178.821	5.31545	107.483	75.7861	66.4661
Gstm2	2114.43	-1.85382	0.265242	-6.98914	2.76582e-12	8.39818e-11	2793.46	1293.98	1534.91	1365.68	5860.99	1536.21	4097.16	1125.47	1335.57	848.127	1592.35	1360.44	4574.02	1522.91	1456.58	1533.05
Ambp	869.159	2.27155	0.325245	6.98412	2.8665e-12	8.68189e-11	1312.24	1036.54	896.104	1037.32	186.95	986.425	141.237	1425.93	624.622	589.518	1055.99	880.424	292.137	1096.27	976.98	1367.86
Pdpn	592.668	2.78251	0.398415	6.98393	2.87028e-12	8.68189e-11	177.677	660.803	766.187	977.477	119.623	330.824	132.914	1100.2	898.895	1214.95	519.847	582.513	155.677	651.281	669.756	524.056
Acox2	145.173	5.04439	0.722414	6.98268	2.89598e-12	8.74288e-11	136.685	176.665	231.287	239.08	39.1384	77.8025	1.37093	233.794	199.017	215.554	102.845	147.083	10.0841	82.9282	261.359	168.067
Iqgap1	4595.98	1.1513	0.165046	6.97563	3.04503e-12	9.17527e-11	3944.03	4652.62	5247.34	6124.85	2081.79	5111.06	2887.99	5074.73	5296.33	7099.46	3870.73	4990.4	2370.76	4848.26	5166.78	4768.63
Serpine2	997.181	2.51118	0.360242	6.97081	3.15115e-12	9.47689e-11	215.893	755.757	1318.65	1912.99	275.376	1275.98	281.492	1763.87	1469.59	1849.53	468.764	1348.15	293.754	1030.5	788.794	905.807
Fabp4	711.531	-1.42264	0.204195	-6.96706	3.23634e-12	9.71458e-11	491.466	544.324	470.263	469.744	1762.82	563.764	1097.82	626.414	612.367	313.425	517.858	840.557	1524.49	749.725	410.663	388.803
Add1	1611.26	1.18386	0.169938	6.96645	3.2503e-12	9.73792e-11	1672.61	1837.75	1769.82	1867.5	791.365	1924.46	805.379	2003.42	1849.55	2405.14	1374.64	1713.52	876.128	1673.27	1665.5	1550.19
Map4	1497.98	1.46505	0.21042	6.9625	3.34297e-12	9.99657e-11	1118.23	1477.26	1837.21	2048.37	938.848	1329.93	583.92	2364.72	2002.41	2384.64	1144.46	1489.77	720.388	1460.48	1639.95	1427.14
Hcls1	336.091	2.72402	0.391426	6.95923	3.42133e-12	1.02115e-10	99.4693	364.644	470.414	475.98	86.0976	448.186	50.4076	583.459	384.675	491.237	343.888	419.82	83.1913	462.144	269.251	344.589
mt-Cytb	61234.9	-1.23195	0.177054	-6.95802	3.45096e-12	1.02805e-10	34086	39845.1	41561.5	43006.7	133907	49465.8	107577	63860.3	52404.5	46228.4	45676.1	48105.7	112316	45728.2	61781.5	54209.1
Arid3a	101.734	3.0654	0.440587	6.95753	3.46298e-12	1.02968e-10	50.1272	135.082	120.633	135.919	16.5707	123.957	13.0801	194.315	156.154	119.936	115.557	96.347	25.0694	112.653	105.964	106.371
Cx3cl1	199.332	3.11427	0.447634	6.95718	3.47152e-12	1.03028e-10	229.139	279.017	220.024	260.764	17.6774	202.614	33.4889	464.1	261.029	396.31	153.127	120.921	53.4874	154.509	203.659	139.446
Cpxm2	704.083	5.95544	0.856358	6.95438	3.5412e-12	1.04898e-10	37.7041	767.904	827.37	1126.45	29.2233	355.211	13.8405	896.136	1751.04	2918.68	252.578	582.49	13.6158	458.874	620.667	613.536
Tbxas1	288.442	3.37287	0.485111	6.95278	3.58146e-12	1.05892e-10	32.7918	230.868	436.704	463.647	52.1766	379.774	29.2453	456.196	369.14	440.602	225.227	459.811	44.5193	351.334	386.84	256.193
Hck	154.519	3.70669	0.533481	6.94812	3.70189e-12	1.09247e-10	59.7843	241.358	198.381	209.521	30.7469	160.992	7.06116	313.965	179.077	278.499	205.541	121.334	15.0377	167.486	135.633	147.888
Rcan2	350.237	-2.10439	0.303126	-6.9423	3.85762e-12	1.1363e-10	327.982	272.993	249.157	199.828	719.178	293.489	824.682	140.062	115.039	162.11	225.274	299.849	716.471	444.276	261.315	352.084
Krt20	2400.88	2.00728	0.289368	6.93678	4.01149e-12	1.17942e-10	2898.52	3736.08	2295.31	1677.98	374.196	4138.33	673.948	1709.59	1836.06	1565.12	2633.73	3839.74	353.488	3648.34	3561.23	3472.5
Rbp4	310.774	3.01979	0.435859	6.92837	4.25724e-12	1.24934e-10	78.6462	430.577	449.912	473.929	42.5901	213.045	73.1203	453.158	428.783	350.452	380.656	214.401	51.0098	176.435	545.046	610.623
Dvl3	803.678	-1.10622	0.159695	-6.92708	4.2963e-12	1.25846e-10	948.058	761.647	574.351	536.5	1264.36	768.6	1216.63	536.061	660.51	537.373	973.567	639.994	1243.76	734.889	683.732	778.817
Lcat	95.889	-3.43712	0.496315	-6.92528	4.35108e-12	1.27215e-10	154.603	31.1691	26.4143	47.8246	400.548	43.3642	374.415	15.1339	34.1448	13.0036	62.1162	24.2334	223.255	37.2068	18.9471	27.8447
Gm15459	1475.86	23.5053	3.39488	6.92374	4.39858e-12	1.28365e-10	24.4695	0	8.19754	0	0	7038.8	0	5958.98	24.0566	10472.6	0	41.7817	0	13.4358	19.7709	11.6768
Col8a1	518.803	4.12779	0.596299	6.92235	4.44197e-12	1.29392e-10	100.102	434.683	653.981	850.124	73.7851	400.133	47.4259	1586.36	786.107	1857.96	187.532	403.611	45.1826	266.649	327.867	279.345
Ifi27	1776.72	-2.34147	0.338331	-6.92065	4.49573e-12	1.30582e-10	497.079	1229.65	1003.74	733.059	4248.43	1693.11	4099.76	872.03	825.788	731.802	2177.27	1622.64	4707.29	1711.22	1242.39	1032.27
Rer1	1517.51	-0.685975	0.0991217	-6.92054	4.49939e-12	1.30582e-10	1442.72	1230.91	1406.48	1319.37	2135.68	1411.04	2168.96	1289.01	1258.13	1373.89	1479.84	1556.5	2054.23	1497.39	1369.77	1286.16
Slc12a2	2453.83	1.32444	0.19142	6.91903	4.54758e-12	1.31738e-10	2201.14	2485.95	2839.99	3201.78	1093.6	2048.96	1352.89	2481.96	3101.75	4556.99	2123.19	2665.67	1033.88	1984.36	3269.61	2819.5
mt-Nd4l	4434.65	-0.950565	0.137394	-6.91855	4.56303e-12	1.31943e-10	2481.43	3263.49	3409.27	3624.78	7881.83	3536.15	7341.04	4283.44	4160.24	3805.38	3334.16	3766.2	7215.93	3785.79	4637.09	4428.2
Arhgef6	393.839	2.13385	0.308482	6.91726	4.6046e-12	1.32901e-10	209.613	454.653	464.975	469.17	84.0947	573.374	95.78	359.707	444.434	754.039	219.137	614.898	118.162	544.72	429.352	465.319
Hmox1	364.744	2.40494	0.347799	6.91474	4.68712e-12	1.35035e-10	105.422	371.494	557.068	620.266	110.425	477.883	99.616	610.12	444.066	378.22	406.67	416.029	106.069	475.366	317.996	339.193
Slc28a3	521.667	1.76571	0.255382	6.91401	4.71148e-12	1.35243e-10	451.787	480.495	871.429	817.493	226.312	494.372	147.597	502.795	588.981	452.345	531.811	698.526	239.445	540.074	618.158	685.047
Tmem86a	191.604	2.53508	0.366657	6.91404	4.71028e-12	1.35243e-10	159.052	273.783	248.659	244.07	47.4333	189.226	49.922	414.021	234.358	309.486	137.839	186.346	50.4982	204.638	157.343	158.984
Bmp2k	422.656	1.7558	0.254233	6.90624	4.97675e-12	1.42598e-10	285.882	429.324	541.048	592.071	166.19	498.327	122.009	484.104	545.905	765.789	341.802	493.883	194.245	450.068	451.42	400.426
Neurl3	280.458	2.34349	0.339412	6.90457	5.03546e-12	1.44018e-10	197.713	288.083	314.889	315.29	65.7584	354.207	82.3237	562.708	325.397	572.049	199.071	273.762	76.5264	298.489	318.369	242.699
Crip1	533.019	2.12688	0.308172	6.90161	5.14157e-12	1.46786e-10	348.134	579.577	676.752	778.387	195.004	678.059	142.278	1319.35	608.399	429.12	541.299	402.775	244.518	653.186	476.972	454.497
Cpb1	966179	-3.0219	0.438095	-6.89782	5.28063e-12	1.50484e-10	526532	614062	521035	433098	2.87825e+06	729178	3.02862e+06	101220	339394	194839	865262	576479	2.58965e+06	730101	649832	681317
Vgll3	313.515	2.70064	0.391576	6.89685	5.31679e-12	1.51241e-10	159.052	342.86	361.603	470.825	94.8666	252.301	32.4493	338.351	527.693	696.474	294.608	411.967	69.1029	229.442	398.712	335.933
Gjb2	847.309	-2.76806	0.401604	-6.8925	5.48201e-12	1.55659e-10	473.818	859.256	426.272	310.86	1433.54	780.556	2738.22	120.531	380.249	236.146	896.249	823.099	2144.85	701.762	595.597	635.937
Arg1	155.86	4.89902	0.711276	6.88764	5.67255e-12	1.6078e-10	87.8676	150.791	143.912	151.719	5.27037	43.3642	7.48831	873.984	176.932	248.629	108.26	123.674	21.2624	58.9108	141.691	150.002
Cela3b	170468	-3.49262	0.507232	-6.88565	5.75229e-12	1.62747e-10	164774	108272	70408.8	54327.1	513030	113332	487152	27689.3	42004.7	10318.7	200577	40272.3	641193	97525.5	63829.8	92776.1
Sec62	3832.03	-1.54944	0.225172	-6.88112	5.9383e-12	1.67709e-10	2449.67	2345.82	2972.56	3049.31	10072.3	2406.59	6928.65	1926.91	2909.46	3222.72	4028.55	2772.67	6835.38	2721.09	3298.33	3372.4
Ndufc1	325.76	-1.37956	0.200595	-6.87736	6.09699e-12	1.71883e-10	199.408	197.136	274.168	242.463	787.329	260.64	613.259	282.033	230.508	202.992	291.354	286.702	610.148	210.177	254.611	269.234
Atp8a1	436.236	2.3465	0.341243	6.87631	6.14207e-12	1.72712e-10	226.14	429.958	548.859	567.757	107.219	385.255	99.1606	560.732	547.857	1099.8	346.093	627.48	120.365	409.208	491.192	412.692
Mest	2045.69	3.48543	0.506886	6.87617	6.14832e-12	1.72712e-10	202.998	2757.23	2469.71	3385.96	250.037	1661.05	403.638	3316.24	3574.69	2486.35	1719.48	1976.82	199.495	2500.34	3154.97	2671.95
Vcam1	588.358	3.10201	0.451433	6.87147	6.35422e-12	1.78178e-10	110.113	329.382	851.633	1170.05	163.381	372.538	94.8519	1068.56	1020.46	1932.86	287.509	459.598	100.996	451.649	522.28	477.851
Prcp	336.368	1.90463	0.277343	6.86742	6.53735e-12	1.82988e-10	204.654	290.631	476.368	619.246	100.137	358.74	132.293	316.191	453.971	565.398	228.943	435.365	140.864	340.029	352.58	366.472
Lama1	202.788	7.92328	1.1548	6.86117	6.82971e-12	1.90832e-10	27.8062	134.785	254.124	343.018	2.63518	180.356	2.4961	622.653	456.299	521.185	50.2846	213.922	0	175.699	121.92	137.427
Hagh	517.614	-1.69026	0.246406	-6.85965	6.90316e-12	1.92543e-10	561.836	441.768	414.919	337.623	1168.17	437.614	920.801	258.713	307.179	208.429	559.622	335.97	1097.24	453.416	441.096	337.426
Copz2	1525.85	-1.87411	0.273394	-6.85498	7.13203e-12	1.98575e-10	1127.42	1310.77	942.346	959.811	3365.99	1373.56	3256.19	816.389	982.919	502.948	1568.56	847.455	3553.16	1311.63	1201	1293.45
Sh3rf1	533.683	1.29293	0.188639	6.85397	7.18272e-12	1.99634e-10	488.277	475.118	674.931	746.229	252.978	516.428	264.587	610.221	623.919	781.778	641.868	546.504	295.016	411.342	568.412	641.326
Rgs17	93.7232	3.89687	0.568718	6.85202	7.28169e-12	2.02028e-10	92.3304	93.6737	111.432	165.42	7.28447	41.4357	8.28001	226.286	100.33	265.214	51.6483	77.9992	18.3855	37.3438	94.3293	108.179
Bnip2	644.392	1.2317	0.179809	6.85003	7.38356e-12	2.04495e-10	506.661	631.069	784.333	810.525	356.519	647.025	298.347	771.491	771.424	1059.23	517.91	761.591	345.883	616.903	712.113	719.242
Apobec1	391.769	2.8725	0.41937	6.84956	7.40754e-12	2.04532e-10	95.6012	456.025	579.226	533.264	60.3195	450.182	65.3485	602.054	532.586	620.061	315.819	683.03	108.406	439.089	412.016	315.276
Rrbp1	12854.4	-1.41061	0.205951	-6.84925	7.42384e-12	2.04532e-10	13414.4	9171.39	10113.7	9372.04	24284.2	10673.6	27079.6	8184.26	9053.48	6193.33	11067.5	11714.2	21856.6	10897.6	10847.4	11747.4
Tubb2b	98.8308	3.92842	0.57355	6.84931	7.4207e-12	2.04532e-10	68.9594	92.6649	129.339	125.333	10.5407	78.844	7.48831	356.188	127.267	161.245	97.6112	41.7817	18.6046	88.883	84.0261	92.5162
Klk1b5	933.976	-3.59994	0.525631	-6.8488	7.44725e-12	2.04635e-10	1557.15	384.138	316.971	305.913	2806.47	674.116	2902.97	78.3721	247.55	70.7397	822.301	503.887	2910.29	576.706	356.699	429.347
Ndufb8	926.092	-1.19066	0.173853	-6.84868	7.45355e-12	2.04635e-10	801.748	708.582	700.602	654.525	1823.35	799.389	1639.32	878.307	684.193	537.125	985.926	792.367	1536.3	831.421	795.546	648.773
A130010J15Rik	281.167	-1.38847	0.202815	-6.846	7.59418e-12	2.08133e-10	326.567	212.654	227.283	220.201	457.129	243.473	579.2	153.779	190.88	182.757	237.863	230.689	513.602	270.438	223.028	229.13
Rexo2	840.526	-1.24536	0.182001	-6.8426	7.77696e-12	2.12773e-10	432.665	636.018	668.555	658.825	1686.52	770.7	1772.23	713.456	663.496	552.394	754.86	685.219	1350.16	762.74	701.042	639.529
Dennd2a	213.625	1.43415	0.20967	6.84005	7.91681e-12	2.16223e-10	237.325	225.04	272.058	300.011	138.767	194.767	74.3307	281.748	298.101	240.728	214.602	168.849	108.927	240.409	211.783	210.546
Thbs1	3043.88	2.15523	0.315187	6.83795	8.03343e-12	2.19029e-10	4433.95	2992.36	3362.16	3571.47	1244.06	2848.15	483.764	5471.54	3529.93	5022.83	2107.86	2954.75	956.241	3237.65	3246.95	3238.42
Spred1	1149.62	1.29531	0.189536	6.83409	8.25253e-12	2.24489e-10	920.349	1042.69	1269.7	1439.59	574.37	1059.8	548.98	1217.58	1559.59	2145.3	1031.5	1293.92	553.088	1045.01	1403.67	1288.8
Ttyh3	585.141	2.11671	0.309736	6.83393	8.26216e-12	2.24489e-10	380.389	819.663	657.625	719.843	144.935	742.119	199.688	1157.2	655.736	483.215	789.172	466.283	207.309	725.533	556.055	657.494
Fcna	513.072	2.79742	0.409447	6.83219	8.36276e-12	2.26831e-10	135.957	662.367	545.543	451.537	101.173	708.449	73.2259	794.126	780.61	788.384	429.53	743.599	103.959	829.14	609.303	452.251
Asns	5958.73	-2.30608	0.338015	-6.82242	8.95187e-12	2.42393e-10	4152.68	3991.56	4044.9	3982.94	16423.5	4574.63	14437	1663.86	2712.26	1392.54	5733.18	4507.5	15141.5	4594.75	3727.54	4259.24
Sra1	824.275	-0.863066	0.126517	-6.82173	8.99493e-12	2.43141e-10	673.989	716.268	699.807	657.874	1285.66	734.902	1261.05	781.478	669.966	613.502	854.459	723.555	1289.04	768.361	738.089	720.397
Anxa10	124.778	8.84577	1.29676	6.82141	9.01496e-12	2.43265e-10	183.858	123.632	167.6	212.777	0	118.885	0	430.265	66.9492	211.329	55.3096	135.633	0	106.245	88.4842	95.4747
Lyrm9	424.058	-2.56718	0.376421	-6.81997	9.10593e-12	2.453e-10	324.198	310.875	200.825	207.114	1212.46	425.13	990.05	102.018	235.932	68.6904	534.122	250.082	1107.66	386.879	222.501	206.403
Tmem43	534.397	1.33481	0.195806	6.817	9.29643e-12	2.50004e-10	560.088	535.422	619.701	666.127	257.418	562.301	286.857	849.825	678.591	738.697	449.49	504.437	293.379	560.345	495.835	491.834
Etv4	105.515	3.97231	0.582817	6.8157	9.38067e-12	2.5184e-10	92.7893	131.659	141.308	126.884	18.7745	78.8882	0	307.252	125.56	131.467	91.7874	95.8189	19.1118	99.5605	95.716	131.67
Serpine1	217.276	2.79562	0.410462	6.81092	9.69789e-12	2.59913e-10	266.965	207.61	380.357	318.65	73.74	133.619	26.2513	512.494	211.306	396.348	191.647	192.447	54.3495	169.076	167.57	173.991
Evi2a	226.841	3.04543	0.447302	6.80845	9.86581e-12	2.63965e-10	54.369	232.978	297.238	349.124	33.6417	356.367	49.8088	278.059	293.854	353.777	179.823	406.996	28.2524	291.422	265.144	158.609
Kif26b	131.264	5.11758	0.751697	6.80804	9.8936e-12	2.6426e-10	19.5447	137.339	177.838	316.352	12.8628	89.4779	2.43678	303.003	144.697	380.33	98.8423	100.34	5.18928	84.0689	107.764	120.131
Fam189a2	160.31	-2.31844	0.340631	-6.80631	1.00132e-11	2.67001e-10	241.358	149.106	84.7079	69.2632	252.978	189.226	396.88	61.6167	66.7376	55.6555	121.866	98.6047	403.986	134.358	112.859	125.75
Nfs1	459.427	-1.22949	0.180749	-6.8022	1.03031e-11	2.74268e-10	466.028	268.793	367.917	344.268	832.835	415.05	866.869	376.164	366.67	346.281	408.755	345.466	858.934	346.907	402.877	337.02
Cadm1	598.552	2.20188	0.324054	6.79481	1.08456e-11	2.88223e-10	303.287	584.354	687.713	929.087	186.741	524.768	138.776	970.911	716.244	1422.22	508.704	582.283	213.451	586.821	567.804	653.661
Cpz	207.432	4.13908	0.609279	6.7934	1.09522e-11	2.90565e-10	22.245	283.049	310.596	380.948	42.1629	177.399	9.98441	538.876	301.871	242.908	146.713	183.004	13.289	243.911	191.118	230.841
Rnase1	237022	-3.16125	0.465744	-6.78753	1.1407e-11	3.02122e-10	91385.7	139729	119840	100411	726678	178637	779213	26361.1	78600.6	38938.6	205505	126131	676137	167305	154893	182591
Lcp2	221.779	3.33919	0.492196	6.78426	1.16679e-11	3.08514e-10	29.72	213.67	354.833	323.526	35.0035	299.038	23.239	292.431	297.22	351.922	167.303	394.295	35.6873	281.873	269.857	178.853
Vasp	910.751	1.22421	0.180461	6.78379	1.17063e-11	3.0901e-10	681.856	858.099	1064.07	1156.36	503.679	977.717	511.524	1585.87	1077.51	1160.98	810.147	922.678	554.14	915.19	850.08	942.106
Ehbp1l1	335.282	2.45444	0.361879	6.78249	1.18125e-11	3.11292e-10	199.671	470.706	325.725	434.973	95.1531	497.387	82.808	768.326	411.854	364.46	430.098	258.267	88.187	380.255	283.458	273.175
Akr1b8	219.106	3.38795	0.499643	6.78075	1.19556e-11	3.14537e-10	421.582	226.07	248.002	285.08	55.2244	189.326	14.6684	604.545	281.218	343.873	130.367	173.509	33.8404	178.157	175.083	145.156
Wfdc2	165.361	3.63544	0.536353	6.77808	1.21784e-11	3.19866e-10	416.202	261.074	222.243	177.696	9.04573	98.1092	13.3905	446.997	185.944	190.881	138.405	101.877	36.4935	105.25	85.8234	156.353
2210010C04Rik	427080	-3.71607	0.548367	-6.77661	1.23029e-11	3.22597e-10	235703	270977	184927	147440	1.35711e+06	317576	1.56808e+06	27639.9	69376.1	30733.8	347692	235619	1.30692e+06	304427	162324	266749
Tlr7	248.167	2.55561	0.377221	6.77484	1.24543e-11	3.26024e-10	220.455	220.481	303.134	384.841	64.3853	153.269	27.3391	247.2	324.375	369.256	209.962	453.985	69.4165	415.877	266.205	240.485
Gpr133	782.072	2.11896	0.31279	6.77436	1.24958e-11	3.26569e-10	388.544	1222.65	999.958	994.412	274.255	837.347	187.619	1133.9	1075.56	845.275	710.835	694.034	264.563	1170.11	954.804	759.286
Csf2ra	161.215	2.74691	0.405711	6.7706	1.28247e-11	3.3461e-10	73.4084	171.009	183.078	244.895	34.2574	322.275	22.4649	271.33	185.468	152.923	197.589	154.592	42.5248	196.369	165.581	161.679
Paqr8	147.634	3.22691	0.476884	6.76666	1.31788e-11	3.43279e-10	210.01	191.246	170.634	223.117	42.8013	103.425	15.2034	321.893	173.547	302.051	92.2384	109.341	13.4902	120.457	128.784	143.908
Cd300lb	97.9253	4.52723	0.669572	6.76138	1.36679e-11	3.55433e-10	25.7818	110.536	138.73	125.033	11.5912	164.046	0	105.284	156.829	139.116	90.6037	129.133	5.13397	150.729	89.72	124.538
Denr	739.903	-0.937196	0.138615	-6.76114	1.36908e-11	3.55441e-10	772.485	560.974	613.579	606.407	1288.33	693.513	1128	569.397	629.697	682.071	673.323	726.66	1057.61	608.205	613.809	614.392
PCDHGB6	753.686	1.21446	0.179703	6.75813	1.39785e-11	3.62313e-10	763.26	1042.02	839.614	1011.91	413.92	810.155	418.557	727.881	927.85	880.471	845.156	680.313	300.272	747.451	875.76	774.385
Tgfb1	314.351	2.11391	0.312809	6.75784	1.40062e-11	3.62436e-10	200.973	354.966	385.622	384.121	117.207	362.218	75.9621	732.594	368.23	326.325	210.499	403.47	130.657	422.755	268.053	285.964
Zfp618	184.219	2.12942	0.315121	6.75746	1.40432e-11	3.62798e-10	160.201	204.455	152.139	206.797	39.9694	181.736	46.0694	250.428	284.802	369.089	170.954	139.577	63.77	150.018	241.523	285.97
Nin	441.163	1.90378	0.281915	6.75304	1.44783e-11	3.73425e-10	252.164	516.197	515.339	648.817	209.657	468.763	130.381	576.151	633.386	722.87	357.367	559.492	136.829	442.807	484.198	404.184
Dpysl3	996.026	2.46716	0.365513	6.74986	1.47989e-11	3.81071e-10	526.69	1088.83	1168.93	1344.43	273.022	725.261	314.66	1493.42	1576.21	2867.41	739.701	831.49	173.462	874.771	1001.09	937.042
Sprr2a3	37.8397	8.97344	1.32951	6.74945	1.48406e-11	3.81521e-10	0	8.03113	81.5446	50.1537	0	10.738	0	186.061	57.436	89.3842	11.8733	11.3808	0	12.6683	44.7112	41.454
Msn	2964.15	2.02605	0.300383	6.7449	1.53132e-11	3.9303e-10	1285.67	2887.07	3699.43	4281.44	1389.3	2877.74	903.934	5412.61	3978.48	5445.84	2143.67	3559.58	906.116	3113.59	2984.72	2557.29
Col18a1	832.771	2.04427	0.303113	6.74425	1.53821e-11	3.94158e-10	562.037	1236.17	1010.71	1219.15	410.129	723.505	161.868	1475.26	1076.5	908.723	682.102	758.2	305.245	934.835	972.013	887.896
Cyfip1	1356.64	1.05095	0.15587	6.74244	1.5575e-11	3.98451e-10	969.252	1229.77	1668.6	1780.12	921.88	1614.43	680.411	1724.53	1658.81	1822.55	1152.33	1462.62	875.293	1340.41	1454.08	1351.18
Moxd1	139.589	6.24322	0.926573	6.73797	1.60616e-11	4.10235e-10	12.226	63.1355	155.642	432.586	2.6333	31.5151	4.98864	455.854	263.658	524.692	17.7348	74.3183	5.31181	32.0163	79.027	78.089
Gstp1	3373.72	-1.86282	0.276554	-6.73585	1.62976e-11	4.14918e-10	2495.89	2423.61	2280.74	1822.28	7755.34	3040.42	6764.44	2363.59	1939.27	1041.85	3576.71	2092.43	8411.94	2966.21	2207.75	2797.04
Krtcap2	1221.44	-1.5708	0.233197	-6.73595	1.62867e-11	4.14918e-10	819.318	958.725	958.774	753.148	2555.24	1020.59	2370.09	888.069	740.702	552.656	1363.73	880.113	2517.88	1098.89	976.298	1088.82
3110007F17Rik	80.3857	2.40318	0.356867	6.7341	1.64951e-11	4.19268e-10	78.5185	104.484	103.207	92.0895	17.1565	88.4311	23.5703	80.7629	124.45	105.482	55.9116	102.107	15.4504	87.6287	99.1251	107.796
Try10	7982.74	-2.57918	0.383022	-6.73375	1.65345e-11	4.19592e-10	6266.41	5754.49	4765.5	3387.3	19413.4	5291.42	17652.4	1930.66	4050.04	1658.74	6823.91	4529.13	26275	7000.05	5736.02	7189.32
Prkaa2	392.855	-1.96123	0.291334	-6.73189	1.67477e-11	4.2432e-10	427.103	248.51	296.933	262.211	769.473	295.665	876.132	103.775	223.493	246.549	365.598	330.075	935.546	315.224	306.448	282.938
Chl1	185.685	3.93575	0.585022	6.72752	1.72577e-11	4.3654e-10	40.041	133.1	350.672	356.211	28.987	173.457	9.98441	229.171	235.134	536.79	226.576	167.962	18.6046	106.453	205.123	152.697
Fzd2	135.249	3.42171	0.508697	6.72642	1.73888e-11	4.39151e-10	60.0614	204.705	132.071	203.667	23.7166	112.353	17.4727	332.946	221.165	265.274	131.331	71.8645	21.2624	112.654	117.801	135.631
Dock11	427.84	1.98665	0.295449	6.72416	1.76607e-11	4.45303e-10	289.972	396.906	511.045	592.632	106.346	432.446	117.141	590.963	563.468	866.161	294.137	502.639	210.3	512.97	477.264	381.055
Pcdh7	234.502	2.21268	0.329282	6.71972	1.82069e-11	4.58343e-10	172.414	213.856	270.554	393.286	71.1287	196.803	83.5016	248.944	376.658	535.713	129.218	216.108	54.7463	248.186	282.807	258.099
Efnb1	254.849	1.75865	0.26185	6.71625	1.86454e-11	4.68178e-10	299.659	315.353	278.975	356.842	97.1527	259.934	120.341	423.062	319.111	328.874	197.97	180.107	90.4492	275.517	289.692	244.542
Sprr2a1	94.0818	8.753	1.30327	6.71616	1.8657e-11	4.68178e-10	38.9287	74.9743	153.932	147.597	0	44.3498	0	449.694	71.3937	186.212	44.9603	17.5483	0	59.9443	107.092	108.684
Me1	621.261	2.42415	0.361085	6.71351	1.90002e-11	4.75277e-10	513.584	677.585	734.811	871.102	222.426	340.087	116.833	1174.42	873.419	1692.64	466.821	479.208	172.426	415.654	627.84	561.312
Plin2	704.007	2.18613	0.325624	6.71367	1.89793e-11	4.75277e-10	380.336	938.446	901.923	833.454	274.981	807.206	121.822	1405.97	921.672	721.405	728.714	918.639	279.72	687.045	718.757	624.023
Fut2	87.5212	4.79191	0.713946	6.71186	1.92159e-11	4.79911e-10	142.368	120.464	71.9562	103.895	7.90555	64.0608	2.4961	277.816	120.283	90.5052	92.8786	80.2208	5.3156	90.95	60.9601	68.2644
Itga4	582.331	2.62442	0.391193	6.70876	1.96289e-11	4.88677e-10	217.171	569.843	690.114	829.206	136.35	654.217	72.1134	431.137	869.991	1292.85	441.295	1000.43	134.511	773.419	671.074	533.573
Ssr4	4010.04	-2.1466	0.319965	-6.70887	1.96135e-11	4.88677e-10	2787.3	3187.47	2862.2	2215.39	9951.26	3302.31	9708.13	1755.72	1944.68	1106.01	4395.63	1952.18	9487.82	3283.22	2788.01	3433.38
Gcnt2	410.239	2.10265	0.31391	6.69826	2.10917e-11	5.24264e-10	499.074	421.631	505.801	617.126	178.593	328.603	99.5409	737.862	524.359	723.869	267.214	424.074	139.041	358.159	407.174	331.707
C2cd2	466.75	-1.03499	0.154596	-6.69479	2.15985e-11	5.36017e-10	395.961	370.659	386.195	352.913	708.864	417.873	731.358	301.597	431.466	410.915	403.46	453.749	818.603	359.666	442.373	482.342
Clu	77429.5	1.88949	0.282283	6.69361	2.17725e-11	5.39486e-10	72917.3	76102.6	88125.4	90642.2	26124.4	84256.4	33060.3	165989	73792.5	111848	59050.6	119442	25541.3	81633.9	65788.7	64557.2
Nt5e	120.33	3.74968	0.560293	6.69235	2.19618e-11	5.43323e-10	113.775	178.921	187.122	201.318	33.6437	89.0111	7.43203	315.952	110.907	219.4	101.01	103.669	5.27566	73.5923	81.0374	103.215
Syne4	556.658	-2.24	0.335064	-6.6853	2.30457e-11	5.69244e-10	600.498	637.801	268.678	265.865	1042.59	483.488	1421.94	275.108	220.627	136.517	811.056	249.074	1185.5	466.562	368.884	472.347
Atp10a	234.946	1.88907	0.282655	6.6833	2.33616e-11	5.76143e-10	190.195	235.874	238.639	337.246	118.583	209.922	62.4026	368.619	287.127	339.655	227.76	291.636	69.1029	318.325	222.422	241.62
Tmem248	1506.97	-1.47151	0.220193	-6.6828	2.34418e-11	5.77217e-10	1500.02	1060.5	1136.62	1126.32	3146	1371.87	2850.06	726.941	986.241	945.772	1773.04	1358.03	2268.71	1253.52	1180.49	1427.37
Sirpa	1292.85	2.09459	0.313508	6.68116	2.37064e-11	5.82823e-10	786.361	1656.52	1376.89	1480.33	285.932	1973.72	180.172	1609.91	1361.8	1809.07	1028.36	1922.82	569.855	1714.28	1415.85	1513.66
Arhgap4	142.339	3.03941	0.455286	6.67583	2.45834e-11	6.03442e-10	48.4136	149.97	146.017	157.63	13.8771	227.219	28.3921	290.998	168.165	193.395	125.848	145.194	28.6037	220.479	174.014	159.215
Pi16	778.938	3.49836	0.524411	6.67104	2.54004e-11	6.22527e-10	216.967	1083.25	1011.18	1056.79	91.966	633.38	84.6924	2526.16	1234.48	1365.71	916.889	344.197	210.64	651.681	573.172	461.854
H2-Eb1	2201.14	3.41724	0.512344	6.66982	2.56123e-11	6.26747e-10	383.726	1983.03	3367.37	4361.11	529.672	3575.58	199.688	2658.17	2498.78	4309.4	2332.02	1238.41	175.415	2788.44	2422.75	2394.64
Ampd2	644.774	-1.53074	0.229551	-6.66843	2.58556e-11	6.31718e-10	514.99	620.365	362.061	450.298	991.898	746.537	1555.3	442.909	359.508	370.265	597.183	547.776	953.707	623.207	527.302	653.078
Pipox	206.804	2.93631	0.440472	6.66628	2.6236e-11	6.40021e-10	124.467	345.29	300.511	273.723	33.6869	177.305	18.2337	140.767	184.757	262.226	158.625	283.699	36.4029	185.859	344.316	438.991
Fam46a	683.404	1.91152	0.286918	6.66225	2.69675e-11	6.56331e-10	566.374	485.432	846.526	1154.05	308.447	622.145	177.298	696.455	885.035	1457.54	588.282	839.33	228.668	620.376	764.796	693.715
Slc16a6	565.811	-1.56731	0.235256	-6.66213	2.69879e-11	6.56331e-10	368.922	498.698	417.923	319.1	921.622	652.854	1121.41	309.926	424.103	312.023	634.192	412.225	1224.38	568.753	452.364	414.483
Lipa	872.614	1.98074	0.297546	6.65694	2.7958e-11	6.78876e-10	475.002	884.95	1091.63	1246.07	400.594	824.04	182.235	1162.38	1269.81	1679.96	630.121	1032.42	324.3	986.104	947.515	824.686
Abhd17c	636.697	-1.03477	0.15547	-6.65577	2.81827e-11	6.83278e-10	765.958	771.154	489.062	498.79	880.109	652.491	1054.98	400.973	444.196	456.08	705.807	486.552	877.19	552.899	562.437	588.475
Fdx1	211.963	-1.39495	0.20962	-6.65464	2.83997e-11	6.87482e-10	254.705	143.209	147.556	163.263	416.359	186.269	354.447	127.017	161.412	126.395	191.081	205.566	409.301	186.034	149.929	168.864
Ncs1	126.438	3.77992	0.56911	6.64182	3.0983e-11	7.46934e-10	112.109	203.785	220.339	182.846	10.6985	178.809	25.1595	250.605	219.013	235.926	71.5898	74.6362	14.3871	72.9217	59.6427	90.5356
Tmem106a	306.066	2.66747	0.401621	6.64175	3.09978e-11	7.46934e-10	78.7371	304.784	372.263	392.253	72.5808	368.16	40.6798	438.477	372.212	482.694	322.767	466.825	71.559	511.679	326.521	274.864
Wnt5a	238.623	2.32555	0.350122	6.64212	3.092e-11	7.46934e-10	147.456	337.13	272.001	386.805	66.0638	132.244	70.1951	444.472	416.207	474.376	220.648	136.521	92.5382	150.533	273.584	197.201
9530068E07Rik	1837.04	1.11956	0.168591	6.64068	3.12246e-11	7.51248e-10	1638.87	1864.91	2103.06	2318.54	1225.58	1739.92	912.435	2468.46	2206.04	2783.16	1654.54	1976.04	1002.84	1749.32	1894.22	1854.64
Parp3	237.842	1.95563	0.29452	6.64008	3.13518e-11	7.53159e-10	197.418	305.491	323.462	244.233	108.636	274.297	55.7308	359.886	242.503	356.74	215.154	266.588	63.1425	300.716	215.207	276.262
Clec4a3	250.586	3.30503	0.497868	6.63836	3.17192e-11	7.60825e-10	50.8001	211.204	412.174	391.396	61.2911	329.632	22.1167	277.944	290.588	458.713	207.632	512.675	20.6641	273.549	282.083	206.918
Fermt1	749.748	1.74101	0.262303	6.63739	3.19284e-11	7.64679e-10	505.649	855.792	892.094	907.45	194.413	646.072	407.754	1129.85	911.667	1462.08	517.039	626.197	258.577	677.246	1039.23	964.854
Maob	157.484	-1.78088	0.268349	-6.63642	3.21394e-11	7.674e-10	113.307	180.353	120.509	95.3562	299.58	126.53	320.462	66.7433	66.8637	104.501	150.741	134.495	276.104	139.779	180.053	144.367
Mars	1425.59	-1.7449	0.262924	-6.63654	3.21124e-11	7.674e-10	898.534	1112.3	1094.32	944.644	3033	1318.39	2747.94	931.468	757.655	528.072	1823.53	990.689	3592.15	1154.39	874.871	1007.57
Lacc1	163.958	2.65673	0.400357	6.6359	3.22539e-11	7.6897e-10	78.6408	165.55	174.05	203.671	30.9497	166.502	46.7009	192.969	216.906	330.039	172.657	260.671	15.6077	210.071	180.277	178.07
Tff2	20531.3	-2.62215	0.39525	-6.63416	3.26362e-11	7.76909e-10	6090.67	13406.9	12214.3	11184.4	69289.5	13031.9	53434.1	9098.73	7524.28	4049.85	17423.9	7783.93	62075.6	12906.6	13001.8	15983.7
Pla1a	356.436	1.93114	0.291371	6.62779	3.40751e-11	8.09939e-10	176.848	438.895	456.33	556.58	121.218	452.368	87.3636	423.209	486.564	351.098	335.428	535.641	170.099	410.309	373.175	327.849
Plaur	145.856	3.80654	0.574358	6.62747	3.41495e-11	8.10485e-10	398.185	147.421	132.071	149.246	13.1759	165.572	19.9688	379.429	157.532	154.483	115.95	121.167	10.6312	175.699	79.0834	114.073
Col5a2	4096.22	2.47455	0.373432	6.62652	3.43691e-11	8.14443e-10	1146.68	5044.99	5144.89	6273.47	1292.07	4004.77	735.011	7931.8	5836.55	7070.76	3293.17	3920.39	1372.24	4099.38	4563.16	3810.17
Fbp2	81.519	-2.38551	0.360006	-6.6263	3.44197e-11	8.14443e-10	124.572	42.1204	47.3636	38.7544	281.965	63.0752	172.231	45.9423	31.8168	32.249	76.9058	43.4529	188.704	63.0449	19.7709	32.3358
Bmper	216.111	3.3967	0.512818	6.6236	3.50559e-11	8.28255e-10	37.8165	267.886	328.812	311.685	42.1629	248.359	19.9688	315.11	250.654	337.574	269.762	284.115	23.9202	281.118	243.017	195.811
Svep1	3129.42	2.52446	0.381149	6.62327	3.51334e-11	8.28843e-10	882.617	4528.81	4199.35	4403.67	885.937	3362.17	700.553	3167.31	5947.04	4407.41	2380.97	4536.49	723.044	2864.03	3352.79	3728.47
Slc35c2	944.205	-2.13969	0.323083	-6.62273	3.52636e-11	8.30672e-10	748.48	783.711	589.371	488.59	2029.12	867.255	1843.85	352.502	482.472	262.358	1225.31	590.236	2445.1	956.352	665.149	777.424
Btk	129.856	2.93245	0.44285	6.62176	3.54944e-11	8.33616e-10	47.1095	110.905	202.538	170.018	13.5166	157.098	35.4284	164.494	163.198	232.554	100.227	249.072	24.9069	150.23	123.242	133.154
Pstpip1	77.7268	3.59942	0.543565	6.62188	3.54666e-11	8.33616e-10	42.5008	69.9752	76.7922	90.3643	1.57304	125.199	14.2968	177.541	120.512	124.594	61.5678	74.773	15.8933	79.8401	87.0775	81.1304
Pea15a	1153.79	1.5534	0.234877	6.61369	3.7486e-11	8.79079e-10	560.571	1200.16	1502.37	1528.31	562.528	1152.96	544.811	1859.83	1324.9	1761.81	942.655	1296.27	481.143	1218.41	1284.43	1239.54
Itga3	949.45	1.62533	0.245819	6.61192	3.79367e-11	8.88327e-10	1484.45	890.319	1105.68	1095.21	349.645	1193.03	449.845	1748.42	1098.16	890.238	819.134	978.714	428.214	1219.96	718.239	721.955
Pglyrp1	101.831	4.01607	0.607651	6.60918	3.86453e-11	9.03577e-10	86.7554	146.579	116.587	131.93	7.90555	54.2053	9.98441	410.778	124.163	123.795	115.95	21.7265	18.6046	68.2125	90.6164	101.498
C1qtnf5	107.079	4.18446	0.633325	6.60712	3.91862e-11	9.13206e-10	29.2416	137.511	146.192	206.834	26.1109	86.694	2.68973	338.231	146.377	168.443	75.8307	65.6999	5.49017	83.256	81.9634	112.704
Hand2	113.695	3.52843	0.534066	6.60673	3.92889e-11	9.13206e-10	64.5104	111.198	124.785	177.281	15.8111	83.7718	17.4727	345.918	189.349	276.717	62.7078	67.6863	21.2624	82.6818	88.1451	89.8215
Layn	112.703	2.38248	0.36061	6.60682	3.92655e-11	9.13206e-10	64.5104	107.828	176.703	174.807	39.5277	114.324	17.4727	123.233	159.86	187.252	115.359	136.208	34.5514	109.553	114.506	127.547
Tram1	5680.28	-1.68725	0.255382	-6.60675	3.92848e-11	9.13206e-10	4441.8	4097.79	4314.5	4154.82	11029.9	4659.48	13492.1	2092.03	3622.15	3128.72	5538.45	4681.7	9728.86	5000.44	5418.56	5483.21
Pknox2	123.717	3.54097	0.536183	6.60403	4.00125e-11	9.28656e-10	48.6313	198.603	126.019	332.452	18.0045	54.7109	12.7907	163.899	242.905	223.139	127.261	72.0807	24.9688	92.3221	152.19	89.4999
Wipf1	494.475	1.91582	0.290251	6.60056	4.09605e-11	9.49261e-10	299.336	514.892	588.504	803.995	215.243	559.821	133.308	594.134	704.673	905.148	437.238	546.915	185.729	526.338	487.173	409.16
Hexb	806.386	2.45391	0.371952	6.5974	4.18422e-11	9.6827e-10	282.511	820.505	1068.41	1284.67	300.411	716.495	132.293	1385.83	1126.78	1724.28	636.544	909.169	233.887	727.6	867.446	685.338
Plod2	732.907	3.15336	0.478244	6.59361	4.29247e-11	9.91862e-10	162.991	772.781	933.045	926.331	163.149	629.23	60.8455	994.815	1176.67	2296.88	520.548	848.322	116.407	640.32	804.982	679.193
Cdh17	146.312	9.01785	1.36828	6.59066	4.37874e-11	1.01032e-09	42.4154	313.698	131.998	322.73	0	108.35	0	279.821	255.168	424.202	103.469	170.374	0	65.0756	61.7495	61.9423
Hmcn1	596.88	2.58519	0.392315	6.58958	4.41071e-11	1.01621e-09	397.687	742.77	870.161	1030.33	207.108	569.214	183.78	791.361	1009.95	1223.65	334.857	573.344	79.0424	375.042	742.25	419.534
Fmnl1	211.035	2.62445	0.398364	6.58806	4.45611e-11	1.02517e-09	81.7165	352.351	322.104	297.661	54.4878	233.657	42.5105	342.839	250.882	264.279	192.23	196.783	49.5393	301.693	202.756	191.065
Glrx	249.198	1.81661	0.275882	6.58474	4.55683e-11	1.04681e-09	262.491	197.123	330.634	321.579	76.4203	281.867	112.325	426.993	256.862	395.83	176.883	287.458	95.6809	285.252	247.136	232.638
Gabarap	4453.11	-0.994044	0.151178	-6.5753	4.85539e-11	1.11377e-09	4571.33	3239.17	3829.9	3656.11	8992.45	3640.15	6399.96	4079.75	3517.5	3199.14	3732.2	4013.86	7142.81	3863.41	3649.24	3722.72
Aqp12	1393.45	-3.46067	0.527027	-6.56641	5.15435e-11	1.18063e-09	2538.15	1123.77	414.431	350.439	2948.77	1380.76	3424.65	201.605	364.729	88.4247	2199.51	337.596	4613.94	1155.48	440.725	712.285
Dusp5	179.785	3.38382	0.51547	6.56452	5.22014e-11	1.19397e-09	413.757	178.59	112.944	93.1755	10.5407	341	24.961	317.272	194.005	161.765	199.364	240.662	15.9468	270.783	149.105	152.697
Smdt1	490.842	-1.25832	0.191714	-6.56351	5.25553e-11	1.20032e-09	389.231	360.791	321.61	344.723	986.261	456.553	862.8	503.071	386.445	287.175	465.501	355.486	949.835	429.907	390.926	363.159
Mrpl20	395.293	-1.15005	0.175237	-6.56284	5.27926e-11	1.20399e-09	396.27	255.911	324.875	322.306	807.585	282.299	706.353	391.33	300.139	249.087	328.016	320.654	718.647	354.716	295.403	271.092
Nebl	125.101	2.05799	0.313767	6.55896	5.4186e-11	1.23399e-09	78.4344	96.9393	131.677	141.665	47.6303	109.746	33.2872	153.677	150.173	218.649	84.5235	184.54	22.8758	191.332	187.969	168.494
Ms4a4a	173.02	3.43558	0.52397	6.55683	5.4963e-11	1.24987e-09	136.807	74.9743	223.155	286.948	39.5277	107.425	9.98441	386.996	271.607	245.508	123.641	418.652	31.8936	210.839	108.74	91.618
Ksr1	186.596	2.23242	0.340522	6.55589	5.53108e-11	1.25597e-09	269.478	292.405	142.316	310.49	54.725	232.934	46.8999	265.113	289.093	209.448	200.918	130.566	59.741	144.11	177.593	159.707
Amica1	107.724	5.67177	0.865747	6.5513	5.70379e-11	1.29147e-09	259.154	73.2895	156.664	198.72	7.90555	44.3498	2.4961	222.685	127.267	137.838	81.6385	132.03	0	111.62	70.0218	97.9055
Htatsf1	901.557	-0.961428	0.146753	-6.55135	5.70196e-11	1.29147e-09	1035.22	722.558	755.344	728.075	1608.09	739.099	1328	690.749	752.092	711.14	826.38	804.397	1336.76	788.757	870.827	727.412
Pdgfra	1186.58	1.57815	0.241151	6.54424	5.97988e-11	1.35204e-09	1551.04	1437.93	1347.89	1700.39	596.14	1022.34	389.777	1404.04	1747.19	1692.71	837.467	1231.36	571.992	1116.39	1227.87	1110.69
Muc4	140.2	4.62104	0.706392	6.54174	6.08057e-11	1.37283e-09	155.257	196.825	211.03	147.859	13.3723	58.6366	4.11669	519.247	99.5291	245.364	111.598	126.548	13.4871	15.7339	100.085	224.507
Tagln2	3310.14	1.39554	0.213538	6.53532	6.34748e-11	1.43104e-09	4005.74	2984.64	3423.45	3514.54	1731.16	3873.29	1353.03	6299.56	3850.75	3274.99	3157.02	3618.23	1788.25	3990.5	2936.57	3160.46
Tmsb10	1471.69	2.70484	0.414086	6.53206	6.48703e-11	1.46042e-09	440.126	1467.15	1806.98	1690.89	432.262	1495.87	224.941	4593.88	1818.03	1971.33	1218.39	1666.4	483.576	1616.37	1345.39	1275.51
Dhx34	631.569	-2.89397	0.44325	-6.52899	6.62143e-11	1.48855e-09	340.397	609.576	263.551	207.714	1317.98	646.983	1866.27	207.845	210.767	87.3121	838.726	273.298	1775.45	639.673	329.777	489.778
Gpc3	1460.93	1.6365	0.250715	6.52732	6.69571e-11	1.5031e-09	940.358	2076.67	1760.82	2031.68	716.47	955.321	461.586	1565.71	2034.65	2054.23	1400.77	1249.58	605.725	1415.33	2214.23	1891.75
Pigb	538.499	-1.36629	0.209522	-6.52098	6.98484e-11	1.56578e-09	297.913	477.929	364.486	328.797	1142.03	459.207	916.101	368.384	472.221	399.669	498.419	426.296	908.42	536.066	536.337	483.711
Tmed3	3417.21	-1.50504	0.230874	-6.51885	7.08487e-11	1.58594e-09	3525.07	2886.33	2714.01	2232.81	6231.14	2891.71	6799.54	2153.99	2074.02	1544.29	3516.16	2263.21	6498.18	2893.5	2890.71	3560.7
Cdkn2b	117.417	6.33449	0.971851	6.51796	7.12682e-11	1.59307e-09	95.6534	115.41	144.823	166.562	5.27037	97.5695	2.4961	375.646	148.996	298.563	78.089	124.509	0	82.6818	74.1407	68.2644
Lrrn2	98.6135	4.15059	0.637113	6.51468	7.28454e-11	1.62602e-09	38.9287	165.954	122.963	120.386	2.63518	128.122	9.98441	261.601	107.867	87.3844	129.557	82.7277	13.289	133.324	72.4931	100.6
Amot	246.43	1.91714	0.294582	6.50802	7.61477e-11	1.69733e-09	259.093	294.177	244.704	296.503	85.3158	227.115	82.6652	261.457	342.65	559.664	183.451	216.443	59.2676	221.519	317.491	291.365
Hfe	235.294	2.07195	0.318743	6.50039	8.01143e-11	1.78322e-09	124.018	293.794	297.163	321.963	95.4423	275.052	104.998	472.766	394.686	231.146	214.74	174.655	65.307	266.879	206.949	225.148
Gm4631	1465.45	-0.792299	0.122049	-6.49165	8.49033e-11	1.88715e-09	1270.19	1227.39	1162.23	1170.05	1899.97	1348.23	2239	1140.99	1382.09	1686.31	1089.1	1426.43	2166.11	1256.76	1557.78	1424.57
Ghitm	2383.52	-0.829529	0.127816	-6.49004	8.5812e-11	1.90466e-09	1793.26	1884.4	2179.28	2158.42	3558.38	2069.71	3909.71	1737.15	2071.33	2228.08	2090.32	2618.01	3383.71	2198.32	2215.09	2041.21
Als2	435.008	-1.2417	0.191336	-6.48962	8.60525e-11	1.90731e-09	367.37	338.35	311.803	322.095	505.32	468.443	768.833	247.246	326.92	328.101	452.274	498.115	866.383	491.143	321.266	346.472
Erp27	8321.47	-2.26729	0.349422	-6.48869	8.65854e-11	1.91643e-09	6809.64	5941.4	5789.03	4553.2	20436.3	7102.22	20543.8	2123.1	4242.09	2076.59	8177.33	5976.05	19338.3	6846.38	6391.44	6796.7
Tpm4	3428.28	1.6624	0.256338	6.48516	8.86352e-11	1.95905e-09	1964.86	2716.94	4106.87	4123.45	1754.6	3265.32	1417.44	6136.03	4514.55	6525.71	2567.43	4375.14	1302	3321.96	3656.71	3103.47
Krt19	1720.48	3.16384	0.487892	6.48471	8.88997e-11	1.9594e-09	3596.1	1867.59	1913.18	2304.4	185.519	1448.94	201.606	6080.15	1592.29	1890.05	1312.91	1008.63	611.549	1241.05	1104.61	1169.03
Pdia2	28665.8	-2.92524	0.451097	-6.48472	8.88992e-11	1.9594e-09	12880	20032.3	15972.7	11795.1	84406.3	23230.7	77706	5959.09	10797	3658.79	27153	12378.5	91541.1	21421.2	17400.3	22320.8
B4galt5	521.651	2.22029	0.34284	6.47617	9.40773e-11	2.07062e-09	446.064	629.23	671.579	526.159	192.517	574.167	80.77	544.914	686.398	941.281	724.619	529.915	124.914	823.398	401.163	449.332
Sertad4	217.684	2.39389	0.36966	6.47593	9.42279e-11	2.07104e-09	68.2273	233.932	224.928	255.122	55.7061	202.657	55.1645	364.57	307.189	481.305	139.971	223.218	53.6304	199.251	318.977	299.104
Cpa1	574421	-2.75159	0.425281	-6.47004	9.79743e-11	2.15039e-09	403092	382278	327492	272910	1.42875e+06	488056	1.49476e+06	93485.2	231073	99677.3	603440	316322	1.74841e+06	484920	364505	451579
Adra2a	116.815	2.32065	0.358902	6.46598	1.00647e-10	2.2047e-09	104.551	121.307	170.327	184.702	42.1629	163.601	12.4805	194.039	145.892	93.6261	76.9058	132.866	50.4982	99.2182	136.748	140.122
Rassf5	265.288	1.75589	0.271564	6.46585	1.00729e-10	2.2047e-09	184.09	311.248	306.529	293.514	78.8227	291.847	104.528	348.133	378.418	438.747	191.176	313.396	111.299	343.661	285.012	264.193
Dact1	196.474	1.99994	0.309348	6.46503	1.01278e-10	2.21365e-09	178.336	327.109	222.984	221.512	46.1873	152.469	87.3731	304.687	293.203	290.995	193.688	165.935	62.1117	178.128	240.213	178.649
Fnbp1	664.307	1.76	0.272305	6.46334	1.02416e-10	2.23541e-09	431.824	662.223	766.205	804.723	245.017	840.407	223.412	585.312	980.188	1320.15	535.373	943.628	225.393	691.493	709.257	664.313
Wfdc18	84.41	5.24101	0.811002	6.46239	1.03063e-10	2.24643e-09	30.222	66.9742	96.0496	84.5902	2.65197	99.1829	5.02401	215.642	127.973	71.5945	48.3401	165.115	2.67473	140.865	105.978	87.682
Ptgs2	99.7112	4.08395	0.632038	6.46155	1.03633e-10	2.25573e-09	50.6017	49.4201	186.474	72.9104	11.2025	201.769	8.48897	139.241	102.267	201.144	40.371	228.102	2.25972	81.7213	149.912	69.4951
Nhsl2	344.519	1.82108	0.281983	6.45812	1.0601e-10	2.30429e-09	206.17	385.204	385.948	562.731	151.626	301.542	102.588	398.49	477.073	500.233	267.93	422.814	133.358	507.421	372.428	336.745
Clec4a2	198.273	2.68105	0.415837	6.44737	1.13811e-10	2.47045e-09	71.9045	187.489	279.752	366.56	57.4397	332.564	24.9194	234.514	228.858	282.118	176.567	281.455	51.3489	262.502	205.266	129.109
Mcpt2	144.564	9.5573	1.48278	6.44552	1.15206e-10	2.49729e-09	243.582	128.046	223.155	407.334	0	1.9711	0	706.97	100.882	344.856	58.5667	1.67127	0	4.13409	37.0704	54.7911
Colgalt1	1504.03	1.36519	0.211931	6.44167	1.18167e-10	2.55796e-09	1057.75	1476.74	1852.64	1546.88	764.203	1614.33	798.753	2589.52	1951.69	1959.91	1706.13	1420.58	749.5	1667.07	1367.48	1541.34
Fam46c	2809.58	-2.49298	0.387058	-6.44084	1.18815e-10	2.56845e-09	2911.94	2848.61	1507.08	966.273	4517.09	3140.82	8065.56	471.817	1653.21	943.701	2118.62	2273.32	6824.97	2049.41	2108.68	2552.18
Trip6	207.65	2.08667	0.324196	6.43646	1.22294e-10	2.64004e-09	189.082	273.783	216.779	228.404	65.8796	248.359	52.4181	446.451	255.31	177.89	276.269	162.113	85.0497	201.537	205.946	237.129
Rsph3b	542.047	-1.25019	0.194293	-6.43458	1.23816e-10	2.66925e-09	630.645	526.505	394.393	415.579	806.366	545.009	901.093	299.976	361.625	282.439	551.356	549.011	914.284	545.7	494.271	454.497
Mex3a	203.598	2.58383	0.401607	6.43372	1.24516e-10	2.68067e-09	90.0921	215.656	218.601	258.913	34.2574	208.937	74.8831	363.214	269.279	447.845	170.968	243.169	29.2358	173.632	249.607	209.284
Pick1	521.986	-1.37784	0.214255	-6.43082	1.26916e-10	2.7286e-09	455.192	519.632	361.412	312.049	872.653	539.824	968.75	321.301	351.114	286.448	600.869	445.443	780.826	470.054	511.025	555.189
Fblim1	757.758	2.15311	0.335145	6.42443	1.32363e-10	2.84183e-09	684.777	1000.78	875.94	785.612	109.37	737.365	362.999	1594.47	995.119	1078.84	692.967	769.104	246.597	667.144	713.148	809.9
Aass	547.247	-2.5438	0.396427	-6.41681	1.39157e-10	2.98365e-09	482.239	307.87	273.138	269.505	1255.3	479.897	1347.88	90.1322	311.878	152.66	457.742	520.892	1524.64	394.596	348.009	539.566
Onecut3	130.22	8.12032	1.26577	6.4153	1.40549e-10	3.00939e-09	100.102	138.997	175.792	276.228	2.63518	13.7977	0	393.482	188.573	442.123	90.5122	14.2058	0	15.5028	111.211	120.361
Galnt12	105.513	2.1461	0.334569	6.41453	1.41257e-10	3.02046e-09	135.175	101.615	120.678	136.354	39.3765	77.5381	17.4059	201.911	151.518	146.12	102.542	94.0653	47.6574	86.484	104.504	125.269
Tac2	58.6504	8.20318	1.27895	6.41398	1.4177e-10	3.0273e-09	14.9937	22.7123	81.2277	147.29	0	45.9892	0	204.421	129.034	119.799	11.0421	48.5253	0	41.7974	22.2102	49.3652
Gjb1	866.463	-1.59178	0.248432	-6.40731	1.48106e-10	3.15833e-09	767.558	872.013	604.742	539.443	1617.06	798.889	1760.21	554.599	546.456	390.345	1042.64	432.943	1697.82	758.882	682.852	796.956
Dap	8830.23	-1.79733	0.280626	-6.4047	1.50662e-10	3.20848e-09	12591.7	8099.7	6242.81	5086.41	17936.3	8002.1	17173.3	3320	4730.26	3097.31	11278	6192.45	15404.5	7918.36	6892.59	7317.83
Ccdc109b	117.28	2.7467	0.428994	6.40265	1.52703e-10	3.24756e-09	36.1627	74.0009	193.632	188.493	16.839	223.424	28.1022	163.038	135.624	165.702	95.7306	156.304	35.0986	147.866	120.253	96.2107
Cap1	2415.99	1.08584	0.169663	6.39999	1.55392e-10	3.3003e-09	1862.02	2269.71	2838.09	2885.46	1488.21	2627.36	1430.54	3173.09	2958.29	3518.99	1985.48	3092.25	1270.45	2750.43	2251.45	2253.95
Clk4	745.809	-1.21613	0.190047	-6.39912	1.56274e-10	3.31456e-09	744.713	590.035	618.181	446.913	1257.94	703.409	951.947	406.627	603.073	791.421	617.083	712.13	1404.96	712.842	718.148	653.518
1700021F05Rik	209.481	-1.40237	0.219162	-6.39877	1.56638e-10	3.31783e-09	189.676	153.505	145.523	171.84	406.695	204.139	367.904	170.906	131.268	124.624	190.653	135.717	454.807	147.481	200.729	156.221
Etv5	598.624	1.59239	0.248872	6.39845	1.56957e-10	3.32012e-09	392.943	779.614	557.42	538.97	172.576	919.265	198.157	648.378	659.781	767.145	560.308	624.035	227.506	632.797	869.222	1029.86
Pbxip1	818.905	1.14445	0.178895	6.39731	1.58142e-10	3.3407e-09	837.935	1039.51	890.423	890.541	430.848	957.28	470.529	1227.21	877.837	992.941	787.259	792.64	418.575	897.79	787.324	803.833
Atf5	1283.95	-1.85162	0.289473	-6.39655	1.58929e-10	3.35284e-09	673.817	1175.91	908.054	806.282	3262.66	1092.61	2348	768.6	647.328	451.159	1647.14	1046.37	2861.6	1015.8	909.849	927.949
Tmem97	6272.76	-2.16411	0.338354	-6.39599	1.59505e-10	3.36049e-09	8460.88	6447.79	3184.29	2309.6	8174.34	7181.71	15061.5	1939.84	2970.6	1968.23	5589.28	5714.9	11734.2	7149.91	5915.6	6561.46
Ergic2	1373.31	-1.41657	0.221632	-6.39152	1.64248e-10	3.45579e-09	992.338	939.078	990.675	1075.6	2380.94	1180.32	2809	563.09	1118.68	1091.12	1328.19	1418.36	2306	1273.94	1311.39	1194.28
Prdx3	785.801	-0.728855	0.114073	-6.38939	1.66549e-10	3.49952e-09	684.033	569.468	725.938	697.58	1270.16	740.148	1178.16	674	750.41	649.661	706.35	813.907	1089.7	744.136	645.024	634.14
Pnp	952.627	1.29962	0.203435	6.38839	1.67642e-10	3.5178e-09	803.995	842.49	1272.75	1339.59	481.508	699.429	626.598	1799.53	1184.2	1098.47	933.048	954.531	599.49	992.02	761.672	852.712
Irf4	115.715	2.87721	0.450568	6.38575	1.70562e-10	3.57432e-09	31.1475	115.374	176.708	225.156	31.6264	232.519	22.4679	126.992	183.86	126.374	76.3125	148.764	18.6073	132.337	107.077	96.1231
C1qtnf6	568.191	2.87464	0.450219	6.38499	1.71408e-10	3.58727e-09	307.278	694.75	807.341	681.741	175.099	577.682	25.3798	1476.3	860.283	573.478	497.806	416.925	191.625	603.644	548.494	653.233
Gm14296	322.505	-0.953895	0.149412	-6.38433	1.72147e-10	3.59795e-09	299.048	271.928	233.749	263.082	454.072	299.08	531.214	221.742	300.134	331.989	275.895	315.814	492.167	285.216	294.112	290.839
Ctsz	1546.57	1.39635	0.218729	6.38395	1.72582e-10	3.60228e-09	907.595	1539.08	1817.12	1956.69	787.92	1876.49	808.737	2825.72	1753.8	1642.1	1608.51	1759.01	784.052	1898.58	1294.99	1484.75
Saa3	170.908	9.36073	1.46635	6.38368	1.72879e-10	3.6037e-09	32.2552	142.367	197.652	157.491	0	132.064	0	738.319	161.412	327.691	114.176	430.351	0	195.336	46.132	59.2822
Fgf7	94.3309	3.52451	0.552208	6.38258	1.74127e-10	3.62493e-09	28.9934	140.906	141.645	122.612	4.7374	99.2883	8.97474	122.498	115.334	171.546	89.0682	117.317	19.1123	95.9896	114.964	116.307
Pik3cd	269.975	2.68853	0.421557	6.37762	1.79863e-10	3.73938e-09	77.4772	296.056	427.673	349.782	90.4579	419.777	52.8829	344.254	320.121	317.426	297.32	352.487	30.4127	407.8	270.557	265.12
Fam174b	2307.25	-2.02395	0.317418	-6.37629	1.81434e-10	3.76708e-09	1188.99	1694.08	1540.23	1503.18	5170.23	2044.03	5855.86	793.45	1240.85	887.368	2518.37	1770.71	4457.13	2057.74	2066.88	2126.97
Ptprt	129.502	3.97769	0.624127	6.37321	1.85117e-10	3.83849e-09	40.1295	168.261	258.528	224.998	26.0813	17.6325	4.83728	194.281	146.301	375.494	88.3946	35.6214	8.50866	94.3422	174.472	214.149
C1qtnf7	254.063	2.325	0.364924	6.3712	1.87556e-10	3.87886e-09	204.467	295.763	247.087	301.473	47.3893	218.509	113.622	423.409	397.788	506.612	170.833	262.286	47.7663	283.566	308.441	236.002
Cmtm6	1131.39	0.948241	0.148829	6.37135	1.87376e-10	3.87886e-09	1227.92	1303.21	1260.6	1345.69	629.809	1370.9	751.327	1262.06	1267.24	1465.25	1124.6	1155.68	613.952	1068.66	1163.19	1092.23
Slc7a3	224.639	-3.10623	0.487609	-6.37033	1.88623e-10	3.89583e-09	55.4281	247.532	78.1066	75.7707	682.876	125.862	771.227	29.4373	131.486	55.0092	160.762	137.243	566.057	241.344	133.508	102.576
Cib2	123.249	-2.1524	0.337908	-6.36976	1.89322e-10	3.90513e-09	77.8574	96.0345	76.5104	63.4913	353.114	129.107	242.122	75.6696	55.8734	42.6519	130.74	52.6449	310.963	99.2182	71.6694	94.3126
Cpa2	169629	-2.99833	0.470743	-6.36935	1.89825e-10	3.9104e-09	180082	110241	88579.3	74007.3	449487	142231	477000	16631.1	54385.6	24915.3	151274	103815	473503	143238	102409	122265
Gcdh	989.844	-1.96199	0.308092	-6.36821	1.91253e-10	3.93467e-09	1282.51	748.266	652.531	527.188	2209.83	765.556	2325.18	332.966	688.932	338.999	1032.61	614.03	1893.53	877.532	768.674	779.166
Gcsh	589.513	-1.00542	0.15789	-6.36783	1.91715e-10	3.93903e-09	495.306	427.977	468.455	444.77	925.576	704.688	1017.63	476.42	437.194	495.466	515.755	529.237	808.174	538.002	640.691	506.874
Tead2	1149.38	-1.83362	0.287969	-6.36743	1.92226e-10	3.94439e-09	1139.62	991.736	829.958	554.941	2462.56	1111.22	1791.17	648.765	633.54	384.423	1491.59	758.808	2875.29	925.398	832.392	958.584
Col16a1	447.624	1.99147	0.312807	6.36644	1.93466e-10	3.96467e-09	300.869	554.349	572.455	567.464	197.864	399.003	125.976	1120.76	482.872	460.839	412.513	416.976	195.042	471.259	402.745	480.991
Clcf1	118.156	3.12294	0.490569	6.36596	1.94074e-10	3.97197e-09	119.573	163.077	103.23	111.835	17.2656	153.441	13.0835	269.026	168.441	199.122	121.314	73.5207	27.862	130.376	89.3001	130.029
Cdr2l	179.86	2.1898	0.344388	6.35853	2.03699e-10	4.16355e-09	106.776	241.771	204.028	206.965	42.1629	190.211	54.9143	374.024	223.493	205.457	214.745	164.62	69.1029	200.503	169.7	209.284
Ifrd2	612.993	-1.86749	0.293802	-6.35629	2.06683e-10	4.21907e-09	526.376	420.987	431.498	386.728	1488.23	566.211	1442.48	268.151	379.762	206.987	819.337	388.659	1079.74	594.771	363.354	444.607
Mxra8	774.539	1.89567	0.298291	6.35509	2.08309e-10	4.24676e-09	797.071	740.862	986.698	1166.23	344.84	557.907	269.266	1424.44	1176.18	1426.66	400.227	751.76	343.83	609.914	732.181	664.559
Muc1	5980.13	-1.7213	0.270877	-6.35452	2.09076e-10	4.25688e-09	6748.61	5898.91	4173.1	2757.66	12781	5308.65	13106.9	5316.75	2902.87	2362.01	6409.74	3228.08	11577.6	4197.69	4085.52	4827.1
Dexi	251.832	-1.73953	0.273783	-6.3537	2.10192e-10	4.27408e-09	247.352	225.422	144.474	129.861	516.797	236.574	417.311	172.604	157.817	104.786	274.938	142.384	583.495	238.343	215.684	221.462
Ugt1a6a	397.947	2.27222	0.357646	6.35325	2.10812e-10	4.28116e-09	182.548	493.144	634.78	526.077	209.383	378.581	71.4334	508.521	645.972	516.912	343.994	523.888	87.3254	377.34	483.457	383.793
Alg5	815.131	-1.03394	0.162776	-6.3519	2.12665e-10	4.31324e-09	993.78	658.384	647.361	664.663	1200.92	821.959	1422.57	549.602	593.809	602.126	745.688	757.86	1143.53	815.77	743.785	680.29
Tmem184a	1444.69	-2.06564	0.325238	-6.35116	2.1369e-10	4.32847e-09	2618.14	1235.08	912.755	681.206	3082.38	1336.63	2515.04	495.637	773.996	335.85	1828.11	986.39	3390.28	1206.87	803.424	913.241
Adamts1	913.866	1.39022	0.219043	6.34679	2.19851e-10	4.44183e-09	761.593	1020.72	892.622	1051.54	400.977	1091.7	330.076	802.965	991.32	1840.19	742.375	1180.7	338.512	874.311	1066.52	1235.74
Tuba1a	1853.42	1.73078	0.272697	6.3469	2.19692e-10	4.44183e-09	1063.53	2208.96	2131.71	2439.42	907.02	1858.74	748.849	3874.32	1919.29	2076.97	2153.12	1762.38	686.738	2041.42	1852.07	1930.23
mt-Nd6	7144.06	-1.07708	0.16977	-6.34434	2.23375e-10	4.50726e-09	4443.43	4300.49	4819.24	5672.16	14077.1	5369.28	12867.4	8292.85	6456.48	6468	4755.74	5272.01	13002	4653.95	7676.86	6177.93
Uba5	1713.46	-1.86842	0.294563	-6.343	2.25328e-10	4.54085e-09	1000.16	1153.39	1226.39	1358.3	4138.34	1510.16	3934.85	603.484	940.959	795.055	1873.51	1333.9	3228.16	1459.33	1355.4	1503.98
Kctd11	220.595	2.26482	0.357264	6.33936	2.30721e-10	4.64358e-09	88.9799	240.929	273.251	263.035	63.2444	253.286	62.4026	494.014	266.174	331.853	204.688	222.279	77.0763	219.107	224.893	244.315
Spi1	145.217	2.89331	0.456446	6.33879	2.3158e-10	4.65494e-09	52.6091	170.711	199.175	205.15	49.0534	202.516	20.5665	320.25	185.672	185.458	138.223	146.09	19.7898	202.649	118.255	107.301
Aqp8	107.626	-5.10922	0.806143	-6.33786	2.32974e-10	4.677e-09	14.7206	245.93	12.0549	3.35786	70.4113	193.137	523.68	4.27909	12.6407	7.84231	87.2308	76.5665	235.412	135.734	53.6792	45.3334
Cth	562.471	-2.74771	0.433622	-6.33666	2.34806e-10	4.70777e-09	528.188	240.527	358.433	318.194	1665.27	260.298	1747.19	67.5515	277.892	130.594	430.591	409.216	1732.52	266.692	266.799	299.585
Sh3bp2	177.03	2.29723	0.362918	6.32988	2.45347e-10	4.91286e-09	73.1231	201.127	200.4	253.539	65.0289	271.57	41.0246	270.248	206.271	234.244	187.057	218.404	35.9736	262.361	149.726	162.388
Irf8	167.316	2.82898	0.447013	6.32862	2.47364e-10	4.94698e-09	84.976	184.515	228.541	212.267	19.7794	178.578	30.0073	358.562	214.543	267.087	161.045	222.391	58.5505	223.234	110.901	122.073
Gkn1	91.5459	8.89216	1.40517	6.32818	2.4807e-10	4.95481e-09	221.337	192.911	108.39	555.755	0	0	0	223.766	19.4005	21.3259	79.8637	0	0	1.03352	14.0044	26.9465
Aldh3b1	108.796	2.56548	0.405727	6.32317	2.56259e-10	5.10542e-09	53.3879	120.464	130.25	123.684	23.7166	187.255	24.961	215.658	122.611	105.069	117.725	124.509	26.578	166.397	89.7926	108.684
Pdlim7	249.37	2.73527	0.432575	6.32323	2.56159e-10	5.10542e-09	241.847	274.2	276.92	326.104	74.5969	222.277	52.4458	920.202	268.929	301.233	252.849	138.532	75.2478	210.998	147.273	206.263
Carkd	890.458	-1.28152	0.202794	-6.31934	2.62678e-10	5.22669e-09	928.671	771.721	657.997	645.41	1648.92	968.227	1584.42	774.942	631.96	392.955	882.318	618.256	1710.65	744.067	594.704	692.098
Itpripl2	1101.08	1.48367	0.234994	6.31365	2.72526e-10	5.41581e-09	957.646	1015.94	1178.62	1442.98	516.496	1211.24	476.756	1556.09	1387.52	2118.55	831.766	1260.97	499.667	1011.82	1163.19	988.037
Rgs13	77.0376	8.05147	1.27543	6.31273	2.74155e-10	5.44132e-09	68.411	133.283	172.858	114.808	0	0	0	152.553	66.3967	237.258	98.5957	0	0	4.10122	81.2055	103.132
4933434E20Rik	793.929	-0.859222	0.136183	-6.30934	2.8022e-10	5.5547e-09	654.22	655.416	709.253	580.03	1241.77	815.34	1340.99	638.606	715.7	647.386	764.683	755.591	1014.74	741.386	702.544	725.203
C6	99.6548	6.06216	0.961063	6.30777	2.83091e-10	5.60456e-09	20.4436	148.277	174.87	145.459	6.49458	75.3387	0	150.974	165.463	152.997	90.4452	142.498	0	128.729	73.3376	119.15
Loxl1	747.085	3.00746	0.477082	6.30385	2.9034e-10	5.74086e-09	137.919	1209.7	898.997	1043.9	168.652	759.859	127.301	1998.22	996.408	874.884	845.964	569.066	164.784	763.773	716.694	677.254
Wisp1	194.416	3.96861	0.629601	6.30338	2.91231e-10	5.75127e-09	36.694	196.933	250.953	306.735	22.0013	143.54	13.8934	347.749	305.954	753.508	81.2217	153.488	23.7257	155.321	166.596	152.346
Iscu	596.372	-1.30351	0.206815	-6.30282	2.92282e-10	5.7648e-09	844.911	476.082	464.506	418.531	1223.67	466.25	912.006	467.692	414.294	301.561	619.842	432.524	1133.07	542.507	388.727	435.789
Shisa6	117.731	5.44479	0.864231	6.30015	2.97352e-10	5.85747e-09	158.956	264.476	228.768	179.293	8.07037	27.9192	3.82221	217.262	103.976	329.902	37.1409	96.6154	0	32.3774	103.66	91.4649
Itgb3	130.186	2.40498	0.381877	6.29779	3.01914e-10	5.93991e-09	183.48	119.595	151.165	203.622	28.9805	88.6798	34.9376	286.4	183.875	205.412	95.8569	90.2283	53.3108	116.762	139.189	101.476
Gns	2011.13	1.34967	0.214408	6.29484	3.07716e-10	6.0465e-09	2868.49	2082.43	2818.13	2887.62	1275.43	1923.79	783.776	1853.37	2292.36	2130.51	2042.74	2172.65	839.865	2383.3	1919.42	1904.22
Ccdc167	319.713	-2.21106	0.351429	-6.29164	3.14128e-10	6.16481e-09	149.666	273.944	232.521	136.402	611.275	334.403	982.037	142.435	147.551	118.825	343.152	178.361	690.098	269.206	233.534	271.99
Steap2	214.244	2.60939	0.414997	6.28774	3.22111e-10	6.31361e-09	202.467	221.055	216.874	313.878	41.8363	163.505	42.7907	326.546	306.788	584.74	175.413	238.578	58.5936	151.674	203.8	179.362
Mmp23	232.421	2.64137	0.420516	6.28126	3.35831e-10	6.57437e-09	95.2818	367.5	266.544	321.126	68.143	175.863	47.9852	575.436	331.933	299.507	241.193	164.444	63.6603	276.111	212.45	211.554
Fam114a2	951.916	-0.833387	0.132763	-6.27725	3.44613e-10	6.72955e-09	855.615	886.209	863.677	745.701	1393.04	897.132	1296.22	686.365	729.385	755.881	959.224	1036.44	1349.59	879.83	947.016	949.325
Slc30a2	270.712	-3.50477	0.558325	-6.2773	3.44506e-10	6.72955e-09	387.729	253.233	107.032	73.8911	540.49	195.929	657.515	25.4054	67.6322	16.8085	254.58	118.652	1127.13	179.18	156.497	169.695
Col11a1	198.26	5.4631	0.871246	6.27045	3.60013e-10	7.00914e-09	41.2624	156.264	146.146	328.592	4.54647	124.127	15.2564	463.764	465.526	800.483	70.4252	147.449	4.58549	116.82	160.079	126.835
Ecsit	245.577	-1.46872	0.234232	-6.27034	3.60264e-10	7.00914e-09	270.052	211.334	179.404	155.92	441.26	200.886	487.377	174.543	161.861	102.419	329.917	168.419	465.672	252.261	136.586	191.318
Tmsb4x	9175.16	2.14676	0.342347	6.27072	3.59393e-10	7.00914e-09	2636.62	7549.68	11814.8	13088.1	4020.55	9485.43	2288.98	20187.1	11686.4	16795.6	6207.17	10965.7	3306.95	9413.79	9095.44	8260.11
Was	123.904	2.72234	0.434546	6.26478	3.73347e-10	7.25472e-09	47.4228	118.129	139.807	178.909	29.9616	153.209	38.1969	210.591	176.742	196.326	113.79	158.35	15.1094	194.87	114.884	96.1683
Gabarapl2	980.437	-0.914345	0.146012	-6.26214	3.79729e-10	7.36964e-09	973.348	704.278	884.808	855.039	1700.19	832.509	1607.09	727.426	826.175	759.998	896.049	905.464	1343.18	936.252	862.731	872.45
Tmem170	376.682	-1.54201	0.246272	-6.26141	3.81524e-10	7.39537e-09	290.297	283.049	297.844	231.702	743.121	351.841	691.42	159.447	284.023	215.34	399.319	318.376	685.713	375.169	322.1	378.149
Rcn3	454.462	10.7274	1.71391	6.25902	3.87401e-10	7.50007e-09	0	726.998	631.21	654.703	0	484.891	0	1517.72	433.795	513.383	643.051	313.363	0	513.661	420.954	417.67
Gnai2	2678.08	1.25025	0.199857	6.25572	3.95678e-10	7.65092e-09	2324.27	3387.01	2843.64	3087.65	1440.24	3218.48	1406.99	4583.45	2934.39	2578.7	3233.37	2290.13	1394.31	3008.2	2470.03	2648.49
Car2	565.687	3.53645	0.565382	6.25498	3.97577e-10	7.6782e-09	768.023	709.356	626.874	918.704	42.5644	249.622	31.9956	1141.56	781.69	2034.76	358.838	262.839	149.376	227.253	379.115	368.432
Nudt22	241.001	-2.31595	0.370328	-6.25378	4.00629e-10	7.72768e-09	176.998	194.762	128.537	76.7496	636.938	221.938	490.902	134.698	153.783	52.3191	269.103	102.87	718.217	195.502	142.224	160.468
Fgf21	23.6994	-6.12848	0.980043	-6.25327	4.01943e-10	7.74354e-09	1.11225	17.6906	3.64335	0.824562	31.6222	6.89885	39.9376	0.540497	0.776019	2.60073	26.0297	10.8632	215.282	8.26818	4.11893	8.98215
Mrs2	1045.68	-1.03416	0.165451	-6.25052	4.09087e-10	7.87155e-09	1073.32	855.886	795.161	893.001	1486.24	988.507	1902.03	603.735	897.078	840.555	1022.26	996.911	1504.32	952.908	939.939	979.055
Tmem45b	100.19	3.86511	0.618524	6.24893	4.1328e-10	7.94254e-09	179.072	158.373	152.11	145.123	10.5407	20.6966	14.9766	255.115	100.106	248.109	74.5395	16.7127	7.97341	42.3744	76.6121	100.6
Bet1	738.596	-1.67496	0.268064	-6.24835	4.14816e-10	7.95265e-09	436.41	538.959	542.632	597.203	1397.24	646.017	1798.22	286.298	488.69	420.029	754.206	577.969	1385.51	590.53	707.933	649.69
Utp18	480.306	-1.22363	0.195829	-6.24846	4.14508e-10	7.95265e-09	342.49	361.447	399.75	403.577	638.317	475.973	955.996	265.41	339.379	401.325	454.756	501.355	866.112	410.997	443.833	424.179
Ctsa	2195.44	0.891669	0.142727	6.24739	4.1738e-10	7.99208e-09	1795.27	2313.82	2664.92	2681.09	1299.51	2273.06	1416.42	2665.87	2479.56	2545.88	1937.5	2944.08	1525.99	2399.79	1996.42	2187.93
Abca9	801.134	1.86652	0.298829	6.24613	4.20736e-10	8.04658e-09	362.281	679.578	1071.33	1427.33	388.382	899.952	260.989	674.953	1321	1360.95	558.636	1002.04	275.25	877.89	910.705	746.858
Gm21685	373.186	-1.29721	0.207691	-6.24589	4.21387e-10	8.04925e-09	423.355	298.276	279.117	241.43	624.813	398.422	717.692	283.395	257.556	226.452	357.642	262.143	614.929	319.567	296.439	369.747
Slc46a3	211.512	-2.36414	0.378608	-6.24429	4.25719e-10	8.12215e-09	263.327	97.0251	151.619	126.563	779.625	65.5588	406.986	87.4257	122.688	71.2287	122.241	70.6155	696.718	153.619	76.2092	92.7421
Grn	3435.81	1.08175	0.173417	6.23785	4.4363e-10	8.45365e-09	2648.76	3777.94	4094.62	4032.67	2086.16	3884.58	1749.63	5590.74	3792.93	3122.07	3342.52	4018.83	2370.89	4373.4	2969.69	3117.52
Bak1	290.979	2.02003	0.323883	6.2369	4.46331e-10	8.49485e-09	154.153	257.399	339.102	353.675	119.206	375.645	76.8777	705.556	335.291	366.786	257.982	307.031	125.345	360.925	249.427	271.269
Ndufb10	658.413	-1.0578	0.169703	-6.2332	4.57004e-10	8.68749e-09	622.085	491.214	621.515	479.104	1290.63	564.018	1006.63	663.591	490.491	420.755	582.822	540.662	1226.01	493.275	512.943	528.87
Npc1	766.765	1.41704	0.22745	6.23014	4.66013e-10	8.84808e-09	1083.4	739.064	866.919	966.99	312.976	774.184	350.436	897.227	932.726	1003.37	488.241	945.932	365.565	829.477	901.543	810.189
Acvr1c	93.746	-3.13766	0.504099	-6.2243	4.83696e-10	9.15572e-09	150.767	72.8059	34.9568	31.2879	265.564	69.5239	226.393	18.3164	19.2531	23.9119	47.4851	40.2447	197.821	104.154	100.991	96.4602
Hsd17b13	1381.02	-3.41751	0.549046	-6.22445	4.83243e-10	9.15572e-09	2327.81	615.217	602.552	552.516	4506.58	1211.16	3626.29	82.6723	220.554	122.479	1332.82	1459.54	3544.7	1032.9	377.184	481.317
P2rx1	1102.33	-2.55354	0.410259	-6.22422	4.83959e-10	9.15572e-09	1494.22	1192.83	401.187	298.128	1452.64	1122.25	3819.17	361.795	629.752	259.843	967.236	711.823	2172.22	872.045	863.601	1018.48
AB124611	87.4946	3.50787	0.563683	6.22312	4.87365e-10	9.20909e-09	23.5927	98.3806	112.63	141.404	17.1251	148.587	2.70355	129.263	109.263	138.018	69.0168	101.369	12.8129	120.575	90.5596	84.6121
Ptpn7	115.379	3.00031	0.482393	6.21963	4.9833e-10	9.405e-09	24.8994	99.6909	132.694	207.735	28.5299	182.611	7.28857	165.734	148.229	174.765	93.8347	152.223	26.3522	156.523	123.713	121.247
Smim7	1161.93	-0.801776	0.128931	-6.21865	5.01452e-10	9.45261e-09	1147.9	958.493	1083.67	941.378	1645.88	1180.41	1823.39	840.375	994.16	967.517	1123.96	1194.27	1571.55	1108.99	1096.34	912.589
Ddx50	879.83	-1.15679	0.186034	-6.21815	5.03038e-10	9.45987e-09	611.737	605.691	684.039	661.299	1612.73	779.57	1634.95	706.97	649.528	724.562	934.701	850.675	1270.43	617.013	846.852	886.539
Plekho1	229.014	2.10536	0.338581	6.2182	5.02893e-10	9.45987e-09	105.214	270.191	267.986	330.682	82.3399	303.751	72.3491	450.202	260.401	292.182	211.991	244.115	73.3776	299.579	176.583	223.277
Mrc2	596.612	2.3308	0.374967	6.21602	5.09935e-10	9.57814e-09	205.433	934.145	729.086	869.642	169.546	758.731	153.342	1218.62	736.445	655.608	677.18	562.151	206.207	586.73	511.136	571.782
Anxa8	164.713	4.13572	0.665379	6.21559	5.11313e-10	9.59259e-09	68.9665	234.654	233.059	285.531	25.1282	14.1024	11.901	607.897	234.668	529.434	84.6506	22.5769	21.1199	38.451	127.307	95.9669
Leprot	1035.51	1.11878	0.180066	6.21315	5.19314e-10	9.73111e-09	909.625	1009.44	1300.66	1307.53	560.641	1008.74	582.844	1320.7	1172.43	1601.5	824.075	1255.82	618.382	1038.23	1062.82	994.692
Daglb	268.065	1.48944	0.239777	6.21176	5.23947e-10	9.80626e-09	192.054	258.763	330.661	429.597	93.9298	400.672	149.867	323.909	322.783	267.318	270.66	264.283	131.313	389.967	248.244	215.012
2020-03-05	598.042	-1.41052	0.227095	-6.21114	5.26023e-10	9.83345e-09	858.605	395.574	451.848	452.249	1243.9	469.685	1066.39	340.627	431.175	460.905	555.847	520.922	1028.38	405.039	435.483	452.047
Iah1	415.381	-1.08562	0.1748	-6.21064	5.27708e-10	9.85327e-09	341.46	321.8	326.08	313.334	716.77	392.249	629.018	408.616	330.584	246.029	330.103	357.651	853.154	370.001	351.756	357.49
Hgfac	502.412	-2.97183	0.478597	-6.20945	5.31706e-10	9.91615e-09	412.644	423.731	233.174	143.474	1122.59	496.717	1575.04	203.227	109.419	58.2563	781.481	141.222	1358.14	486.789	193.59	299.106
Spryd4	266.265	-1.2921	0.208094	-6.20919	5.32587e-10	9.92084e-09	245.807	187.015	234.085	191.298	453.251	262.156	591.576	171.878	189.349	163.846	260.888	220.607	396.012	258.381	196.061	238.027
Igsf10	680.499	2.53074	0.407603	6.20883	5.33802e-10	9.93174e-09	147.46	892.312	861.411	1000.36	135.006	699.539	177.643	648.117	1178.2	1225.58	553.573	744.812	165.901	628.024	941.253	888.795
Ndufb6	291.296	-1.15011	0.185259	-6.20812	5.36223e-10	9.96502e-09	246.027	214.677	213.859	211.445	565.632	271.283	471.657	308.516	207.415	226.159	272.546	249.856	534.557	234.426	195.816	236.871
Car4	17.5655	-3.90735	0.630127	-6.2009	5.61401e-10	1.04206e-08	4.64621	12.9784	6.35542	4.51517	114.013	5.22969	39.1012	1.78496	6.81211	2.84823	12.8574	3.77392	60.0163	4.31734	0.860302	0.938031
5031439G07Rik	929.774	1.0937	0.176459	6.19807	5.71613e-10	1.05977e-08	819.215	1045	1071.01	1223.23	504.189	1337.18	483.809	994.593	958.641	1024.69	1077.85	891.934	503.742	1201.94	894.16	845.186
Ldlrad4	177.86	2.26087	0.364877	6.19626	5.78217e-10	1.07075e-08	115.674	249.353	225.888	224.281	26.3518	167.544	62.4026	225.928	232.806	361.501	152.628	155.428	53.156	197.403	236.426	158.984
Pmaip1	93.01	5.39359	0.870707	6.19449	5.84732e-10	1.08155e-08	193.531	69.0775	122.963	138.526	7.90555	61.1041	2.4961	182.688	137.355	226.263	51.4677	86.0702	0	59.9443	73.3169	75.4501
Dcaf11	1521.7	-1.37926	0.222675	-6.19405	5.86371e-10	1.08331e-08	2098.86	1281.34	1227.71	955.834	2610.47	1295.61	2684.54	895.907	1104.32	745.739	1522.07	1175.75	2864.79	1343.45	1108.13	1432.68
Plxdc2	1301.91	1.88265	0.304004	6.19287	5.90802e-10	1.09022e-08	881.478	1090.08	1540.57	2013.04	707.264	1008.15	347.608	1887.22	2016.02	2931.67	675.55	1324.51	462.861	1240.4	1460.08	1244.04
Lif	72.4541	3.31975	0.536104	6.19237	5.92678e-10	1.09031e-08	51.8122	57.6108	73.1237	124.777	13.0591	105.497	7.42191	198.127	83.0676	103.107	65.5983	74.5402	15.8054	69.6564	65.3185	50.7443
Nfkbie	82.4257	4.68789	0.757017	6.19258	5.91872e-10	1.09031e-08	28.9185	98.5617	91.9946	84.1054	0	113.338	0	162.69	107.867	145.12	75.7226	102.783	13.289	108.52	89.7926	96.1091
Sema4c	194.283	1.77183	0.286134	6.1923	5.92928e-10	1.09031e-08	190.619	259.012	265.79	240.614	82.6148	223.067	110.108	304.297	298.912	201.103	128.948	213.744	58.6063	168.891	179.024	183.185
Clec12a	179.639	3.87982	0.626604	6.19182	5.94742e-10	1.0911e-08	15.5252	167.607	295.506	254.178	28.7474	241.725	8.48827	236.37	210.551	452.264	141.011	206.705	13.4289	245.795	203.353	152.977
Pla2g1b	13984.6	-5.26732	0.850682	-6.19189	5.94487e-10	1.0911e-08	8456.97	5417.68	2582.05	1959.36	51787.3	9753.54	56732.7	207.399	876.811	153.676	12365.6	4189.3	53961.2	8965.75	2497.76	3846.32
Abcg3	113.673	3.87005	0.626072	6.18148	6.35047e-10	1.16369e-08	7.6022	86.2262	143.572	174.867	10.2922	168.792	17.0608	132.948	156.603	201.579	63.953	154.931	2.9809	163.894	164.031	169.433
Tpbg	82.0723	3.4693	0.561285	6.18099	6.37012e-10	1.16593e-08	59.2314	71.101	97.011	89.4791	18.5346	69.3188	5.0161	204.463	109.942	203.305	49.3365	64.6518	10.6821	74.7699	66.279	120.035
Wdfy4	312.505	2.88684	0.467153	6.17964	6.4248e-10	1.17458e-08	59.203	304.759	347.596	520.572	68.9444	412.56	40.5346	307.203	494.702	595.959	316.49	359.844	59.945	485.974	374.584	251.207
Shc2	113.446	2.52921	0.409358	6.17849	6.47177e-10	1.18179e-08	74.7883	164.021	147.406	135.882	34.8616	81.5803	8.98682	229.912	150.274	188.71	125.334	68.4847	43.7736	88.6359	124.77	147.72
Mfap2	193.912	2.70756	0.438341	6.17684	6.53971e-10	1.19282e-08	94.4737	309.359	216.212	265.892	29.6801	211.797	41.5966	492.825	262.479	160.894	200.548	131.518	70.7552	209.938	174.135	230.494
Tmem2	490.862	1.52629	0.247119	6.17634	6.56044e-10	1.19521e-08	368.294	434.276	527.204	628.273	245.318	411.057	214.88	766.939	629.983	943.018	388.538	544.544	204.856	527.626	544.245	474.734
Trio	530.714	1.68572	0.273006	6.17467	6.62999e-10	1.20649e-08	488.277	543.353	630.3	736.334	171.287	595.272	134.79	352.404	710.057	709.998	572.061	588.286	260.465	760.673	674.68	563.181
Emp3	253.886	2.5128	0.40702	6.17366	6.67281e-10	1.21288e-08	97.1438	343.04	293.009	321.434	79.3645	244.382	60.1406	646.541	316.319	323.49	257.072	283.981	68.1148	314.757	217.033	196.354
Commd6	296.593	-0.889291	0.144076	-6.17236	6.72772e-10	1.22145e-08	313.466	249.781	258.08	231.356	511.89	296.18	382.194	237.608	228.314	242.938	276.505	304.451	435.43	280.972	245.645	250.672
Tnfaip8l2	84.7679	4.07046	0.659497	6.17207	6.74029e-10	1.22233e-08	24.4695	109.513	114.766	110.491	13.1759	103.483	0	215.658	84.586	100.388	88.7375	93.5909	10.6312	117.822	68.3742	100.6
Asb4	42.0597	3.09857	0.502329	6.1684	6.89861e-10	1.2496e-08	47.334	38.4254	71.4703	73.0856	7.09915	32.5346	8.96596	86.0296	61.0935	48.1005	31.0536	30.7662	9.54678	43.2696	44.785	39.3946
Prpsap1	1147.46	-1.40501	0.227921	-6.16446	7.07236e-10	1.2796e-08	1470.21	1102.94	870.865	698.796	1770.85	1118.54	1864.91	566.617	723.864	553.974	1220.47	1100.8	2038.87	1062.51	1105.95	1089.23
Chsy1	267.126	1.83773	0.298172	6.16331	7.12394e-10	1.28746e-08	111.225	247.668	332.456	396.614	97.5018	271.026	117.317	445.37	318.168	498.299	208.829	274.088	98.3387	264.582	321.276	271.261
Tmed6	5532.99	-2.78061	0.451266	-6.1618	7.19225e-10	1.29683e-08	3375.67	3931.52	2997.57	2375.56	13133.7	4706	16204.7	727.509	2494.9	997.638	5586.91	3281.53	14952.8	4607.44	4307.58	4846.77
Ubl4	893.689	-1.17962	0.191438	-6.16192	7.1868e-10	1.29683e-08	800.394	729.518	833.972	678.418	1693.68	848.607	1460.27	678.823	621.973	436.248	935.231	701.442	1624.1	854.673	655.063	746.618
Dock8	470.815	2.19728	0.356638	6.16109	7.22454e-10	1.30116e-08	134.582	522.293	627.567	672.843	134.394	705.654	162.247	523.201	658.84	692.833	418.249	540.655	108.97	721.399	483.562	425.754
Atp5f1	2213.77	-0.75651	0.122815	-6.15977	7.28495e-10	1.31054e-08	2220.58	1766.63	1977.11	2045.17	3658.54	1865.59	3218.33	1862.5	1884.65	1846.2	1982.64	2294.74	2966.48	1934.93	1932.34	1963.84
Stom	475.408	1.85274	0.300806	6.15927	7.30789e-10	1.31317e-08	373.716	532.402	604.796	562.352	268.789	487.847	87.3636	811.827	639.439	663.705	372.697	623.383	188.704	508.493	458.849	422.161
Fyb	258.733	3.4949	0.567639	6.1569	7.41841e-10	1.33151e-08	81.5027	343.347	308.803	350.558	68.6779	299.037	8.88446	310.282	344.529	636.617	367.275	272.485	24.3671	235.205	286.793	201.365
Me3	83.6008	-2.87928	0.46772	-6.15599	7.46105e-10	1.33764e-08	70.7644	51.9483	42.933	32.7373	186.76	92.8548	206.442	28.4792	21.3369	8.79627	53.3981	68.5977	296.382	69.5634	53.8798	52.739
Mcee	167.51	-1.15219	0.187234	-6.15375	7.56717e-10	1.35513e-08	156.827	162.585	138.447	114.614	316.222	165.572	239.626	123.233	134.251	100.908	166.826	146.236	295.016	147.794	121.096	150.9
Gpx3	1690.34	2.25983	0.367253	6.15334	7.58701e-10	1.35629e-08	4157.57	1869.52	1838.44	2223.47	454.921	1431.74	402.253	3320.25	1746.28	2485.99	1387.5	1581.86	572.555	1137.34	1202.37	1233.45
Hmgn1	1212.4	1.30068	0.211381	6.15325	7.59086e-10	1.35629e-08	960.983	1077.44	1350.77	1398.46	642.985	1027.93	589.08	1983.08	1545.83	2023.88	902.164	1475.73	680.397	1134.81	1351.01	1253.91
Spats2	193.765	1.39239	0.226295	6.15301	7.60249e-10	1.35683e-08	172.399	221.553	215.869	228.404	97.5018	204.994	79.8753	309.705	252.982	249.15	166.235	176.319	111.628	179.833	209.242	224.554
Duox2	311.318	3.21394	0.522466	6.15149	7.67563e-10	1.36774e-08	90.6515	317.754	635.132	502.418	68.6512	247.575	16.257	199.937	528.707	536.984	449.781	323.426	67.001	334.704	367.418	294.695
Sult1c2	277.192	-1.77522	0.288589	-6.15138	7.681e-10	1.36774e-08	163.501	209.76	253.213	201.193	719.405	243.431	614.041	161.068	103.987	160.205	248.465	174.647	510.298	206.705	200.18	264.974
Coasy	496.9	-1.43215	0.232981	-6.14705	7.89362e-10	1.40401e-08	627.241	460.664	351.007	262.335	830.414	495.628	897.309	407.025	322.8	214.809	550.927	350.175	993.276	464.388	312.678	409.727
Tnfaip2	388.797	2.17149	0.353373	6.14503	7.99502e-10	1.42045e-08	271.898	516.598	528.154	465.255	190.678	616.106	53.0435	634.506	508.438	393.689	383.726	343.612	133.317	461.963	413.822	305.946
Pbld1	704.89	-2.35425	0.38317	-6.14415	8.03911e-10	1.42667e-08	837.302	641.232	407.68	308.447	1517.7	716.354	1321.28	138.006	343.687	171.835	802.481	492.648	1749.21	649.816	570.023	610.53
Pls3	1329.73	1.86844	0.304192	6.14228	8.13436e-10	1.44195e-08	826.47	1328.2	1566.9	1990	640.787	890.812	476.1	2171.19	1915.24	3122.05	851.462	1312.3	453.384	1074.52	1426.55	1229.7
C1qa	1715.72	2.67929	0.436278	6.14125	8.18764e-10	1.44976e-08	488.277	2011.67	2129.54	1900.62	519.131	2086.41	214.665	4506.13	1970.31	1913.61	2242.1	1773.21	497.009	2148.69	1563.55	1486.55
Rmdn3	318.73	-1.28868	0.209854	-6.14083	8.2093e-10	1.45197e-08	245.258	266.015	243.312	235.643	487.341	260.731	754.416	205.794	267.135	213.768	358.498	295.832	499.186	262.256	218.804	285.695
Tspan9	561.845	1.40746	0.229207	6.14055	8.22352e-10	1.45285e-08	548.411	667.496	613.73	755.646	288.6	512.069	284.454	1003.71	694.001	707.048	500.166	386.652	294.687	593.475	468.266	671.116
Uqcrq	328.605	-1.95671	0.318848	-6.13681	8.41936e-10	1.48579e-08	205.151	181.069	199.508	175.661	784.765	223.724	714.102	270.278	155.502	118.855	454.557	260.062	837.614	288.204	166.231	222.39
Cbs	3963.46	-2.33341	0.380478	-6.13284	8.63253e-10	1.5217e-08	3135.44	4045.95	2346.74	2037.71	7636.16	3710.09	11287.1	896.242	1847.77	985.285	4495.49	2316.67	8016.13	4157.64	3178.94	3321.91
Tmem125	203.43	-1.57016	0.256169	-6.12941	8.8204e-10	1.55308e-08	177.86	174.689	147.882	135.754	409.04	177.818	509.579	136.225	130.757	78.7429	253.772	141.943	308.334	186.603	134.021	151.856
Senp2	295.609	-1.57437	0.256955	-6.12704	8.95292e-10	1.57466e-08	314.766	139.84	220.423	214.386	893.327	187.255	514.197	248.629	201.765	182.051	224.802	198.881	571.427	193.269	200.18	224.554
Slc37a2	122.735	3.10762	0.507415	6.12442	9.10166e-10	1.59903e-08	38.1565	149.486	136.705	119.042	18.8337	198.579	14.2718	215.354	144.264	250.498	91.3261	205.617	20.6171	149.21	128.35	83.4544
Dtnb	656.551	-1.82838	0.298563	-6.12392	9.12987e-10	1.6022e-08	766.59	506.397	383.483	341.719	1188.9	691.78	1296.11	493.105	290.546	239.345	886.034	382.018	1532.55	535.338	432	538.901
Tfec	48.207	7.65393	1.24995	6.12339	9.16053e-10	1.60579e-08	13.347	37.9084	123.874	103.07	0	22.6677	0	85.9391	72.1697	65.5383	33.7202	68.5219	0	48.5756	41.1893	54.7911
Fam187b	82.4735	-1.62114	0.264793	-6.12227	9.2254e-10	1.61426e-08	76.0802	79.2481	51.4402	55.1793	151.215	85.3906	163.215	41.8328	53.1239	36.9037	85.4843	64.7762	148.413	94.6826	66.2584	66.3331
Fut1	118.379	-3.31103	0.540824	-6.1222	9.2293e-10	1.61426e-08	14.4592	153.318	56.4719	40.4036	255.613	85.7429	461.779	23.2414	28.7127	22.8864	107.668	94.4266	385.381	64.0784	57.665	42.2161
Inhba	198.824	4.51578	0.73764	6.12193	9.24485e-10	1.61518e-08	36.0983	250.626	274.435	278.835	19.132	146.38	1.94811	376.979	422.663	707.17	90.5019	106.017	28.9428	116.281	185.209	139.961
Armc10	456.383	1.06581	0.174107	6.12155	9.2669e-10	1.61724e-08	476.63	512.201	516.698	467.822	265.105	463.19	227.148	612.995	530.509	636.579	411.488	492.206	271.418	430.191	517.952	470.002
Cldn18	124.578	7.75574	1.26724	6.1202	9.34583e-10	1.62921e-08	487.091	138.17	130.296	131.297	0	210.984	0	75.1888	76.9805	72.0293	91.7837	244.593	0	204.598	69.5592	60.6752
Rab8b	777.728	1.84775	0.302049	6.11737	9.51341e-10	1.6566e-08	300.307	680.666	912.659	1240.97	345.209	934.302	264.587	837.771	1019.69	1461.09	585.076	1091.34	225.913	903.299	947.353	693.422
Sema5a	1189.27	1.70755	0.279273	6.11429	9.69864e-10	1.68698e-08	491.614	1244.24	1348.04	1620.27	450.616	1015.12	461.779	1264.76	1754.58	2521.66	744.803	1368.77	462.458	1026.29	1640.16	1613.19
Tubb5	3260.83	1.40001	0.229093	6.11113	9.89309e-10	1.71891e-08	1929.06	3537.65	4130.53	4001.11	1381.34	3296.68	2070.48	5855.21	3644.23	3462.23	3369.37	3271.39	1559.17	3677.06	3310.88	3676.82
Mei4	33.1291	-3.03254	0.496382	-6.10928	1.00081e-09	1.73698e-08	18.0803	27.3877	19.0366	10.5315	52.0157	33.1858	92.7444	5.64821	8.10942	9.74805	40.5269	29.0696	114.182	25.2008	25.8258	18.7728
Fos	142.293	3.39208	0.555321	6.10832	1.00684e-09	1.74552e-08	261.946	270.702	160.899	183.656	40.4785	117.326	10.8459	409.834	163.904	206.434	85.0045	73.8069	16.1678	75.4097	120.658	79.6181
Cacna2d1	362.058	2.52239	0.413115	6.10579	1.02294e-09	1.77149e-08	172.992	303.549	443.268	584.473	124.74	294.659	110.576	454.35	656.131	956.708	214.311	443.883	43.7899	178.719	440.685	370.093
Klk1b4	189.587	-2.64854	0.433794	-6.10552	1.02468e-09	1.77254e-08	268.052	119.622	91.9946	76.6843	445.346	156.703	549.143	49.7257	85.3621	20.8058	216.519	135.373	430.564	170.531	93.9116	123.056
Ppif	394.249	-1.54337	0.25304	-6.09932	1.06523e-09	1.84068e-08	403.182	332.677	286.248	249.819	865.862	339.331	695.29	254.501	271.455	153.911	502.943	231.104	759.932	378.234	257.991	325.503
Gm8113	846.558	1.73764	0.284956	6.09793	1.07448e-09	1.85463e-08	461.583	1079.12	921.768	978.756	316.222	842.646	354.447	1045.86	1065.47	1680.59	483.323	954.293	231.229	701.762	1252.98	1174.87
Nup93	281.354	1.19802	0.196476	6.09754	1.07713e-09	1.85717e-08	211.34	211.457	349.782	388.392	137.038	250.345	217.174	431.473	346.901	356.841	259.129	305.024	140.872	257.362	329.534	309.004
Eif2b5	818.372	-0.974087	0.159763	-6.09706	1.08037e-09	1.86072e-08	769.687	695.542	717.776	686.522	1404.93	788.361	1371.48	561.846	666.848	518.033	921.84	743.722	1099.66	812.41	653.253	682.041
Fam107b	570.635	1.8528	0.303948	6.09578	1.08905e-09	1.87362e-08	552.976	589.664	596.869	660.076	163.766	632.435	242.668	735.65	679.584	1286.14	322.072	715.148	155.033	590.911	624.744	582.427
Fcgr1	189.904	4.02329	0.660297	6.09316	1.10703e-09	1.90248e-08	15.5715	212.287	245.015	206.141	10.5407	186.269	24.961	380.51	229.702	328.732	201.138	416.981	13.289	239.777	152.4	175.152
Ggt1	2594.55	-2.36894	0.388874	-6.09178	1.11663e-09	1.91689e-08	2096.02	1587.99	1633.33	1274.81	7253.93	2021.81	5728.49	1038.68	1445.72	381.028	3026.42	1034.46	7909.06	2019.01	1406.19	1655.77
Rabl6	1275.26	-1.55281	0.254955	-6.09053	1.12535e-09	1.92974e-08	1467.9	791.265	1061.77	910.642	3390.2	970.291	2232.28	727.831	750.221	728.381	1136.69	1061.31	1973.02	1262.98	822.144	1117.27
Lcn2	1893.79	5.65988	0.930097	6.08526	1.16304e-09	1.99222e-08	12432.6	547.258	1218.92	1359.44	58.049	1389.72	22.6146	5096.11	1698.11	1470.37	623.647	1728.74	58.474	1461.65	574.041	560.831
Dmbt1	44192.1	-2.48996	0.409339	-6.08288	1.1804e-09	2.01755e-08	44920.4	28873.5	30798.2	16934.9	85783.1	61984.2	140468	7995.58	14451.8	17558	63900.4	43212.3	69427.1	28488	31353.3	20923.9
Pycard	190.361	1.56652	0.257528	6.0829	1.18024e-09	2.01755e-08	140.143	216.499	230.442	211.913	97.5018	223.72	67.3948	289.166	221.165	205.457	192.265	257.375	77.0763	225.308	153.224	237.129
Rab27a	656.652	-1.34435	0.221037	-6.08199	1.187e-09	2.02664e-08	428.903	553.48	481.593	493.355	1040.49	617.97	1477.01	367.989	528.6	397.552	687.144	549.544	1043.3	650.201	611.905	577.39
Rbpj	1366.19	1.29694	0.213268	6.08127	1.19237e-09	2.03361e-08	806.932	1254.72	1754.17	2034.16	778.863	1636.52	664.119	1346.18	1611.41	2104.42	1205.82	1646.1	615.649	1475.3	1600.52	1324.22
Trem2	75.0877	4.0656	0.669206	6.07526	1.23791e-09	2.10899e-08	18.7712	98.2446	85.2815	54.9703	1.63154	87.9228	8.49987	239.549	72.531	107.514	75.8733	125.81	11.5364	99.9383	56.3544	56.9754
Rap2b	269.868	1.74618	0.287515	6.07335	1.25272e-09	2.13192e-08	135.694	255.25	302.398	324.878	100.137	306.506	114.821	409.697	352.313	493.098	242.549	327.568	95.6809	309.023	274.321	273.956
Gpatch2l	70.6888	7.68805	1.26621	6.07168	1.26576e-09	2.15179e-08	81.1942	101.089	107.479	112.14	0	77.8585	0	54.5902	120.283	24.4468	37.8613	122.838	0	132.291	79.9072	79.043
Pi4k2b	1287.3	-1.54449	0.254395	-6.07122	1.26939e-09	2.15563e-08	1032.42	1021.13	957.946	933.43	2219.51	1300.38	3022.06	480.826	870.94	793.674	1410.78	1177.07	1847.28	1225.5	1210.87	1093.06
Nabp1	246.914	2.2608	0.372625	6.06723	1.30138e-09	2.20758e-08	68.7491	175.895	336.736	415.283	65.565	373.308	80.3463	292.647	354.409	414.134	191.796	415.382	74.155	295.836	226.134	170.252
Zbtb18	776.164	-1.24104	0.204577	-6.06638	1.30823e-09	2.21682e-08	703.513	594.354	562.238	565.825	1226.19	735.265	1203.04	385.422	593.189	579.432	812.528	972.83	1303.87	700.458	628.333	852.136
Mmp12	195.02	4.07609	0.672055	6.06511	1.31865e-09	2.23208e-08	6.75742	83.9978	417.216	610.675	12.3666	157.495	13.0836	388.041	213.738	303.274	111.699	284.411	51.1134	181.732	140.268	144.451
Chst11	171.036	2.53201	0.417655	6.06244	1.34069e-09	2.26694e-08	92.3166	192.069	269.608	307.562	50.0685	108.411	34.9454	423.209	184.692	371.384	114.176	112.811	69.1029	97.1511	158.167	150.9
Tpp1	831.322	1.04754	0.172809	6.06183	1.34578e-09	2.27311e-08	576.145	707.623	960.934	1104.91	613.998	811.108	451.795	1222.6	1109.71	1086.58	602.823	985.212	531.56	936.372	824.609	775.16
Aldh7a1	1868.18	-1.36391	0.225085	-6.05951	1.36533e-09	2.30366e-08	1157.69	1539.87	1437.34	1347.04	3208.11	1899.82	3468.81	929.405	1505.36	1146.97	2037.82	1536.52	3392.72	1849.52	1763.16	1670.64
Mettl21b	176.516	-2.52383	0.416594	-6.05826	1.37605e-09	2.31927e-08	107.888	163.427	64.6695	67.6141	397.913	213.864	461.779	36.2133	120.283	49.9339	165.052	132.866	382.723	135.391	154.872	169.763
Ier3	143.345	3.17159	0.523753	6.0555	1.39978e-09	2.35674e-08	219.113	149.106	122.052	169.035	31.6222	200.067	22.4649	478.881	164.516	179.97	88.7375	113.646	23.9202	111.62	93.9116	124.852
Emr1	749.911	2.48284	0.410123	6.05389	1.41386e-09	2.37791e-08	137.385	818.893	984.279	1010.46	176.034	976.734	159.277	855.978	911.232	1481.12	588.061	982.907	169.449	1178.44	824.687	743.646
Rab32	257.092	2.12576	0.351184	6.05313	1.42062e-09	2.38673e-08	125.684	255.25	288.736	308.386	105.407	264.127	57.4104	423.209	403.53	539.39	191.081	266.567	82.3919	307.99	275.144	219.165
Osbpl2	1078.27	-1.29565	0.21407	-6.05247	1.42637e-09	2.39385e-08	1178.87	891.557	904.868	859.242	1843.15	1030.09	1870.02	524.485	716.512	601.073	1195.31	889.647	1813.8	1084.05	915.448	934.107
Cdv3	2691.28	-1.21054	0.200023	-6.05201	1.43051e-09	2.39824e-08	2578.57	1740.95	2242.66	2370.9	5632.33	2300.32	4483.51	1605.04	1853.38	2137.75	2906.13	2600.05	3891.37	2316.38	2086.79	2314.38
Ifnar1	775.897	1.05324	0.174064	6.05087	1.44065e-09	2.41267e-08	633.759	806.436	870.645	933.035	487.249	851.332	359.805	859.757	926.131	1186.21	654.068	880.49	450.898	868.513	845.663	800.365
Cops3	726.973	-0.746553	0.123384	-6.05064	1.4427e-09	2.41354e-08	652.883	603.936	620.077	690.17	1138.7	641.52	1057.55	535.03	658.973	708.722	674.096	692.052	950.853	656.886	660.607	689.512
Foxq1	90.1611	5.84215	0.965713	6.04957	1.45232e-09	2.42705e-08	144.592	127.204	102.014	114.614	2.63518	44.3498	4.9922	279.978	95.4503	230.424	75.1311	30.9184	0	40.3074	79.9072	70.0608
Gfpt2	449.038	1.56543	0.25898	6.04462	1.49761e-09	2.50008e-08	675.25	462.52	486.267	518.422	200.655	461.172	89.8881	494.849	544.639	563.16	471.531	386.819	228.693	552.733	584.7	463.313
Prnp	876.818	1.60757	0.266013	6.04322	1.51071e-09	2.5193e-08	877.539	1006.93	1037.99	1230.82	507.097	692.727	262.962	1458.2	1146.52	1545.19	637.629	767.972	430.161	690.771	884.555	852.012
Coq3	160.774	-1.2359	0.204575	-6.04134	1.52842e-09	2.54613e-08	104.112	137.994	106.665	100.338	267.571	160.602	280.378	109.762	141.647	124.824	143.976	203.371	261.175	154.789	119.521	155.666
Zfp217	502.606	0.883044	0.146191	6.04035	1.53781e-09	2.55906e-08	559.882	573.74	661.936	576.672	299.949	604.598	307.213	505.863	512.065	539.843	526.342	542.833	308.549	543.256	500.459	478.492
Tspan11	93.7908	3.08272	0.510424	6.03953	1.54561e-09	2.56933e-08	53.7061	155.666	128.559	164.619	9.7879	69.5522	34.7257	201.26	87.9125	115.78	106.991	44.2292	12.3399	59.5018	118.567	137.455
Fkbp10	423.674	2.10373	0.34848	6.03689	1.57116e-09	2.60905e-08	223.753	512.974	477.474	488.507	156.192	374.337	163.033	1212.47	610.21	490.647	366.107	301.113	167.749	414.885	444.434	374.896
Cdk8	561.258	-1.12647	0.186669	-6.03459	1.59365e-09	2.64362e-08	624.402	394.979	438.478	462.752	1000.11	519.987	840.124	321.711	431.796	439.548	574.418	546.457	866.12	521.367	458.011	539.869
Smim24	117.655	-2.66402	0.441567	-6.03309	1.60854e-09	2.6655e-08	16.3874	41.2839	64.2779	54.9567	431.336	51.7891	178.597	89.0003	48.6789	69.1864	57.3165	38.4948	614.785	56.0074	30.6822	39.7018
Lamb2	843.12	1.70035	0.28192	6.03132	1.62623e-09	2.69199e-08	1106.13	1508.57	877.639	1073.71	233.286	1128.25	321.952	1171.21	831.546	713.898	1219.11	424.825	358.787	839.097	820.569	861.356
Inf2	106.62	2.16739	0.359477	6.0293	1.64674e-09	2.72308e-08	161.276	172.694	107.479	136.877	28.987	111.367	34.9454	217.28	142.011	92.5858	104.119	82.7277	37.2092	120.922	79.0834	76.3483
Ifrd1	2205.39	-1.90521	0.316075	-6.02771	1.66303e-09	2.74714e-08	1731.68	2298.32	1569.33	1293.38	3171.39	1792.37	5116.38	616.783	1342.17	983.8	1903.09	2226.75	5252.53	1886.2	2244.72	1857.31
Gpsm3	101.696	3.08532	0.511873	6.02751	1.66503e-09	2.74756e-08	37.0654	107.044	89.5354	122.393	11.7089	160.238	22.1391	177.969	121.08	194.259	69.2901	176.055	14.0288	155.582	84.4285	84.3118
Crot	727.41	1.13455	0.188262	6.02646	1.67587e-09	2.76255e-08	752.758	786.54	815.796	814.235	310.018	780.675	346.086	645.416	965.844	1025.45	685.535	870.258	450.86	703.94	919.789	765.352
Ndufv3	603.966	-1.50468	0.24974	-6.025	1.69114e-09	2.78482e-08	605.237	516.193	412.786	374.455	1220.05	570.085	1145.46	542.641	324.609	254.412	620.127	399.614	1158.41	521.628	453.629	544.118
Hmgb3	326.952	1.3091	0.217445	6.02038	1.74011e-09	2.86247e-08	159.7	280.405	352.115	350.873	148.44	431.469	155.662	407.353	396.465	532.902	275.178	375.967	152.124	369.853	437.402	405.317
Lhfp	546.133	1.84049	0.305719	6.0202	1.74204e-09	2.86265e-08	297.193	649.183	659.377	804.438	291.755	557.22	181.068	832.363	780.857	969.772	423.941	604.045	172.49	499.552	545.21	469.665
Cers5	339.383	1.29972	0.215915	6.01958	1.74872e-09	2.87064e-08	403.192	308.136	361.203	422.154	170.38	326.447	163.174	503.839	487.159	456.564	284.401	348.27	208.026	321.107	366.881	299.199
2020-03-01	227.433	3.07692	0.511296	6.01788	1.76711e-09	2.89781e-08	51.4905	164.596	390.411	431.956	72.8448	220.594	20.5125	213.193	276.092	481.149	203.883	333.729	24.1897	324.686	237.183	192.423
Gstt3	521.733	-1.4349	0.238741	-6.01027	1.85216e-09	3.03411e-08	834.629	437.368	392.155	284.67	785.979	461.166	957.696	361.317	355.14	270.429	555.343	357.062	1080.95	459.076	333.125	421.613
Pla2g15	361.626	2.22638	0.370524	6.00873	1.86985e-09	3.05991e-08	131.245	372.344	561.987	614.299	52.7037	391.263	132.293	697.241	424.482	393.23	363.232	400.268	183.388	362.766	336.105	369.167
Chn2	125.04	2.9394	0.489214	6.00841	1.87357e-09	3.06282e-08	93.5172	176.922	206.645	176.8	56.0816	134.439	4.60534	185.827	161.614	189.374	172.875	82.5788	11.1364	129.012	99.7711	119.432
Rasa3	480.96	1.57069	0.261423	6.00823	1.87561e-09	3.06298e-08	530.126	506.442	692.724	700.439	240.377	371.831	141.723	669.799	648.487	695.001	346.426	447.83	309.706	454.834	539.566	400.055
Myl12a	1227.41	1.80777	0.301024	6.00541	1.90844e-09	3.11337e-08	1486.81	1568.74	1461.57	1282.13	652.772	1363.6	557.726	2973.1	1642.31	937.554	1442.01	903.413	366.905	1604.72	634.591	760.619
Scpep1	1132.59	1.27731	0.212711	6.0049	1.91445e-09	3.11994e-08	836.411	1181.9	1450.96	1696.12	711.499	890.937	666.459	1829.04	1494.61	1582.28	827.625	1215.85	624.583	1144.11	982.776	986.241
Dynll2	1652.33	-0.8875	0.147953	-5.99851	1.99133e-09	3.24188e-08	1381.22	1274.72	1442.43	1450.79	2457.07	1426.67	2258.7	1143.67	1423.73	1289.51	1572.56	1581.7	2860.87	1645.41	1563.21	1664.96
Prune2	396.746	2.97538	0.496047	5.99819	1.9953e-09	3.24498e-08	52.2757	376.556	531.018	709.124	52.7037	326.217	64.8987	607.519	637.887	849.397	263.255	592.464	119.601	393.772	391.298	379.945
Cd81	2147.54	1.23702	0.20629	5.99651	2.01604e-09	3.27534e-08	1239.19	2553.74	2793.84	2808.31	1167.09	2222.79	1196.57	3451.92	2596.99	2209.82	1963.97	1942.24	1344.51	2318.48	2202.86	2348.37
Ndufb11	1123.85	-1.17762	0.196446	-5.99459	2.03993e-09	3.31074e-08	1526.01	940.127	858.009	755.299	1939.49	985.55	1699.85	902.09	817.924	574.76	1306.81	856.524	2017.27	1054.19	827.081	920.671
Lyrm7	35.1069	-3.23165	0.539166	-5.99381	2.04985e-09	3.32341e-08	18.7832	21.3394	5.51988	8.19142	66.753	58.2526	136.597	9.12772	8.43061	46.2626	34.9666	24.9311	26.4033	26.1806	24.4643	45.5062
Tmed2	6167.33	-1.02258	0.170758	-5.98844	2.11867e-09	3.43147e-08	5489.59	4526.1	5379.15	5356.09	10510.6	5405.13	10660.6	3597.54	4963.06	5020.19	5981.19	6142.66	8223.19	5548.32	5962.96	5910.96
Sned1	880.829	1.86811	0.312035	5.98684	2.13956e-09	3.46174e-08	565.543	1268.69	859.778	996.95	164.002	1152.39	413.352	727.975	1248.1	1198.04	1043.11	971.214	221.347	1009.33	1214.35	1039.1
Sftpd	88.6867	4.74925	0.793723	5.9835	2.1839e-09	3.52986e-08	150.154	88.4528	97.4596	70.0878	7.90555	88.6995	2.4961	179.445	117.955	248.109	62.7078	77.7139	2.6578	68.2125	82.3786	74.5519
Cited2	294.911	-1.11372	0.186165	-5.98245	2.19812e-09	3.5492e-08	324.777	215.656	245.926	219.334	482.238	250.33	469.267	172.959	261.518	245.508	294.017	265.731	504.982	287.319	235.603	243.416
Fat1	1843.53	1.02062	0.170632	5.98141	2.21218e-09	3.56824e-08	1735.96	2087.53	1834.66	1954.95	738.652	2109.99	1204.57	1815.32	2254.62	2441.86	1667.39	2052.59	961.918	1672.07	2494.65	2469.72
Fopnl	402.049	-1.07247	0.179342	-5.98005	2.23073e-09	3.59449e-08	372.083	365.935	323.805	322.777	518.405	445.83	653.065	239.645	358.02	310.613	329.642	418.89	787.403	407.671	312.601	266.397
0610011F06Rik	537.468	-1.9624	0.328245	-5.97847	2.25239e-09	3.62567e-08	362.962	445.179	346.059	301.105	1165.68	631.197	1161.44	344.537	244.371	149.049	649.8	317.6	1286.08	423.68	329.937	440.807
Prkd3	1092	1.02996	0.172354	5.97587	2.2887e-09	3.68037e-08	1225.53	1002.35	1207.61	1397.56	595.039	1115.35	556.846	973.736	1329.4	1585.92	864.948	1219.81	650.706	1135.57	1356.95	1254.69
Gng2	254.379	1.75841	0.294397	5.97291	2.33055e-09	3.74384e-08	265.529	235.1	240.497	407.283	119.05	179.779	93.6508	573.414	321.24	341.497	198.723	232.006	127.057	208.772	276.795	249.668
Casp1	91.0554	3.10705	0.520389	5.97064	2.36324e-09	3.78505e-08	24.4695	66.5502	122.052	141.825	21.0815	120.237	12.4805	123.774	119.507	195.575	68.0321	157.099	10.6312	111.62	96.3829	65.5697
Ripk3	106.359	3.23095	0.541137	5.97066	2.36295e-09	3.78505e-08	45.4737	126.392	99.9098	127.447	32.0441	147.416	10.1176	260.863	171.017	178.944	90.847	118.326	10.7731	122.697	88.7238	70.759
Sdr9c7	21.2453	-4.47095	0.748825	-5.97063	2.3634e-09	3.78505e-08	12.365	19.7204	1.68766	1.25516	78.2207	17.3035	65.7369	1.5816	9.08315	3.0441	4.50259	7.33569	77.7726	15.1215	12.0528	13.1418
Prex1	351.131	2.02413	0.33912	5.96876	2.39057e-09	3.82467e-08	235.934	593.315	388.34	405.107	86.1958	441.552	142.354	575.035	418.572	370.986	333.019	247.695	104.323	454.07	370.008	451.584
D630003M21Rik	131.956	2.78756	0.46728	5.9655	2.43887e-09	3.89799e-08	59.2347	170.144	161.999	203.825	21.1854	95.6522	22.5737	381.107	169.991	199.975	143.262	58.8298	55.863	91.3905	128.305	147.961
Aff3	74.8785	3.14062	0.52656	5.96441	2.45526e-09	3.92021e-08	57.5168	121.577	80.1078	82.2208	16.0372	82.826	2.17011	142.056	95.8033	127.476	82.8485	50.6035	18.0704	63.1904	93.5567	81.9954
Aven	286.032	-1.38264	0.231878	-5.9628	2.47949e-09	3.95488e-08	204.548	182.61	243.962	229.885	680.234	213.502	457.187	203.297	180.467	163.355	272.646	277.228	539.169	242.244	278.49	207.686
Ctrb1	1.4625e+06	-2.35007	0.394332	-5.95962	2.52826e-09	4.02859e-08	2.27462e+06	1.30958e+06	799378	645235	3.22807e+06	1.48626e+06	3.28657e+06	607470	531252	189833	2.14586e+06	658474	3.36371e+06	1.29795e+06	627371	948426
Slc16a2	464.678	1.16874	0.196134	5.95888	2.53973e-09	4.0428e-08	458.459	655.328	498.49	571.723	262.455	396.516	206.759	527.656	514.237	589.341	419.437	548.798	235.878	476.967	517.459	555.354
Mrps18a	322.013	-0.983442	0.165072	-5.95766	2.55867e-09	4.06883e-08	298.593	273.129	265.364	259.764	584.744	266.62	497.685	304.879	228.845	233.741	290.792	259.465	491.816	311.297	264.997	320.477
Spon1	831.175	2.02865	0.340537	5.9572	2.56597e-09	4.07632e-08	377.162	923.367	1189.23	1393.84	389.306	757.467	282.281	1967.82	1066.46	1224.78	540.873	988.541	361.449	597.853	608.289	630.091
Hrsp12	388.646	-1.14386	0.19202	-5.95702	2.56885e-09	4.07679e-08	334.147	323.631	298.563	270.276	518.383	332.157	713.214	199.984	338.226	434.115	382.025	352.843	598.438	377.329	370.296	374.705
St3gal4	750.056	1.55418	0.260994	5.95484	2.60326e-09	4.12725e-08	670.686	673.084	776.945	916.913	397.913	788.44	262.091	1311.25	990.2	1353.94	482.732	769.618	361.461	757.572	768.592	719.471
Gjb3	44.2054	7.66721	1.28803	5.95265	2.63843e-09	4.17879e-08	41.1817	37.9346	70.183	62.7101	0	20.7109	0	179.569	74.5494	96.814	35.5196	17.5604	0	17.582	30.5012	22.4709
Mcpt1	60.814	8.51372	1.43044	5.95183	2.65159e-09	4.19542e-08	41.1532	30.3267	84.7079	217.684	0	0.98555	0	345.378	49.6652	151.362	13.6064	0	0	2.06705	18.1233	17.9643
Ptprs	366.578	3.22313	0.541673	5.95032	2.67616e-09	4.23006e-08	210.135	302.397	636.506	343.577	0	505.652	67.6673	499.255	493.546	401.561	572.504	397.861	90.7306	551.02	497.924	294.904
Mgat3	197.032	2.69675	0.453298	5.94918	2.69497e-09	4.25551e-08	468.257	251.038	225.888	232.527	47.4333	118.266	22.4649	438.343	231.254	353.699	148.487	89.4128	61.1294	112.654	163.933	187.727
Id2	547.419	1.40785	0.23673	5.94708	2.72963e-09	4.30592e-08	431.552	649.497	553.789	601.106	160.746	1014.13	269.579	468.071	543.213	736.005	438.363	901.649	180.731	703.829	568.412	538.031
mt-Nd4	42904.3	-1.05959	0.1782	-5.94606	2.74669e-09	4.32851e-08	21198.3	28141.5	29681.5	33630.6	86647.4	33428.9	72050	46176.8	39407	39151.8	32925.7	34134	74070.3	31748.8	44303.2	39773
Igfbp7	3790.68	1.75031	0.29444	5.94453	2.77258e-09	4.36495e-08	2287.43	4101	4829.56	5138.16	2252.43	2928.47	1141.72	7924.2	5191.39	6586.69	2683.83	3423.87	1752.84	3250.59	3638.44	3520.23
Ahnak	6160.26	1.40859	0.237016	5.94303	2.79805e-09	4.39874e-08	7623.46	5960.78	7054.38	8570.19	3743.79	6051.06	2274.72	6286.12	8774.67	9425.32	4566.16	7218.39	2651.52	5626.39	6958.4	5778.83
Scamp5	251.438	1.44576	0.243274	5.94294	2.79963e-09	4.39874e-08	254.705	322.642	298.755	344.667	126.489	284.824	127.301	458.882	299.543	259.552	191.673	215.593	132.89	238.744	232.308	234.434
C5ar1	284.036	2.74222	0.461446	5.94266	2.80434e-09	4.40175e-08	63.2923	345.082	330.027	375.119	79.5681	248.981	45.2212	643.705	334.29	330.863	299.495	471.828	64.2008	368.238	255.371	289.293
Fam102b	790.645	1.88587	0.317412	5.9414	2.82598e-09	4.43131e-08	1368.63	704.611	912.934	1254.2	392.081	604.385	253.447	825.381	1149.15	1278.52	565.589	761.11	195.051	694.065	910.986	780.187
Col8a2	119.81	4.18427	0.704358	5.94055	2.84074e-09	4.45002e-08	23.3572	154.161	122.963	148.421	10.5407	96.5839	12.4805	262.141	218.837	413.515	57.9752	94.4266	7.97341	104.386	93.0878	96.1091
Gnb1	3505.13	0.581695	0.0979454	5.93897	2.86813e-09	4.48846e-08	3191.84	3761.86	3766.69	4132.5	2804.44	3796.2	2636.57	3976.43	3757.57	3624.21	3315.65	4122.95	2392.41	3770.74	3449.2	3582.83
Casp8	592.418	1.39644	0.235398	5.93223	2.98856e-09	4.67229e-08	361.963	508.672	650.397	722.865	225.859	680.045	293.808	829.449	746.947	992.4	471.764	862.578	321.869	562.334	668.149	579.583
Slit2	580.921	2.50987	0.423342	5.9287	3.05343e-09	4.76898e-08	275.235	676.679	704.283	662.876	188.136	487.482	41.531	538.544	799.306	1508.25	255.444	696.82	135.312	620.724	869.698	834.415
Map1b	384.919	1.41216	0.238274	5.92662	3.09237e-09	4.82502e-08	291.409	350.442	444.489	552.457	242.437	379.437	124.805	499.96	491.22	705.317	334.836	358.487	194.02	327.627	433.311	428.449
Ecm1	751.069	2.13156	0.359695	5.92604	3.10328e-09	4.83726e-08	1285.61	778.707	735.592	933.184	289.513	726.417	176.742	1813.01	930.385	866.991	491.315	714.792	287.67	873.719	604.711	508.752
Hhipl1	73.2833	2.94099	0.496329	5.92548	3.11379e-09	4.84883e-08	109	63.1806	111.122	138.526	28.987	37.4509	9.98441	176.202	106.315	92.5858	72.7647	70.1932	13.289	63.0449	40.3655	39.5215
Acer3	388.761	1.52981	0.258293	5.92277	3.16555e-09	4.92419e-08	235.586	329.38	473.294	553.859	201.335	372.335	128.468	384.55	477.333	743.701	338.64	480.617	161.769	482.056	404.498	452.752
Sdf4	2400.39	-0.706024	0.119208	-5.92262	3.16843e-09	4.92419e-08	2729.03	2031.83	2228.22	2067.18	3573.28	2062.2	3698.95	2316.17	2022.78	1998.36	2135.82	2220.84	3293.39	2097.48	1964.12	1966.55
Pbx1	1318.83	1.24382	0.210036	5.92194	3.18167e-09	4.9399e-08	1779.83	1413.21	1478.3	1627.98	608.464	1231.73	783.449	1437.88	1731.47	2024.29	976.41	1321.46	594.949	1240.2	1378.69	1472.98
Ptgfrn	1630.25	1.22759	0.207358	5.92014	3.21668e-09	4.98934e-08	1354.72	1820.44	1757.92	2111.7	1038.26	1529.57	923.558	2690.6	2002.9	2462.89	1512.68	1425.59	781.394	1499.64	1693.7	1478.46
Sod3	470.983	2.55069	0.431128	5.91632	3.29223e-09	5.1015e-08	132.358	659.605	616.637	611.825	163.381	505.587	54.9143	883.713	627.023	576.321	598.682	451.242	132.89	600.477	482.738	438.329
Etnk1	2240.19	-1.19278	0.201679	-5.91424	3.3342e-09	5.16142e-08	1797.39	1914.79	1543.87	1665.62	3618.11	1978	3888.93	1040.46	1825.97	2152.88	2690.52	2144.24	2904.98	2022.6	2335.43	2319.19
Pgd	877.944	1.18116	0.19972	5.91408	3.33745e-09	5.16142e-08	846.593	858.734	953.817	1037.35	473.629	971.681	565.488	1647.42	978.697	947.747	852.623	897.819	489.207	997.469	759.312	769.516
Copz1	1824.27	-0.807506	0.136624	-5.91043	3.41226e-09	5.27194e-08	1386.97	1499.49	1643.15	1610.37	2946.13	1594.62	3130.11	1876.07	1445.72	1322.73	1708.49	1570.16	2556.81	1626.76	1655.81	1614.99
Zrsr1	8668.61	-3.30114	0.558702	-5.90859	3.45039e-09	5.32564e-08	5570.14	2090.86	2288.93	3332.88	47130.2	4095.95	26935.4	2177.12	4120.66	1340.93	3040.74	1576.84	14051.8	5905.55	10528	4511.74
Slc37a3	703.017	-1.00268	0.169819	-5.90442	3.53883e-09	5.45431e-08	670.686	657.078	514.623	455.983	1104.14	710.582	1050.86	504.284	571.15	499.859	761.959	599.985	919.599	758.606	722.46	746.417
Sptlc2	1188.52	1.10465	0.187092	5.90434	3.54068e-09	5.45431e-08	1374.93	1082.02	1374.53	1474.97	626.976	1265.62	674.674	1652.53	1269.15	1717.19	1088.99	1291.45	711.55	1249.46	1116.08	1046.18
Evl	193.91	2.69767	0.457237	5.89995	3.63622e-09	5.59601e-08	29.2731	225.757	329.742	295.729	48.2292	195.536	58.1144	372.768	294.731	260.054	157.385	165.739	43.0463	217.979	188.459	220.016
Cd300ld	214.471	2.82108	0.478193	5.89947	3.64665e-09	5.60659e-08	35.592	227.45	278.716	390.018	44.7981	252.301	39.9376	225.387	255.31	333.933	151.445	445.393	37.2092	300.755	227.365	185.931
Spred2	620.119	0.978867	0.166042	5.89531	3.7398e-09	5.7442e-08	821.455	686.163	729.739	722.003	350.131	674.364	390.383	552.571	684.929	678.563	713.287	552.043	281.691	582.244	787.137	715.205
H2-Ke6	266.562	-1.1987	0.203417	-5.89282	3.79659e-09	5.82575e-08	276.118	222.719	214.1	194.353	487.147	262.874	418.097	231.793	179.836	140.836	248.317	200.914	509.024	227.311	215.262	236.284
Os9	3193.86	-1.25747	0.213424	-5.89187	3.81842e-09	5.85354e-08	4297.6	2958.42	2454.14	2363.36	5617.34	2891.8	5395.55	2258.25	2221.18	1435.41	3616.37	1957.81	5656.57	2966.43	2387.44	2624.07
Nipal2	628.695	-1.20435	0.204461	-5.89035	3.85371e-09	5.9019e-08	429.328	465.852	503.693	489.79	1096.24	643.564	1238.07	372.403	511.396	362.021	585.076	663.493	906.31	632.516	598.892	560.486
Aldh1a3	286.52	2.60602	0.442652	5.8873	3.92567e-09	6.00305e-08	782.143	557.8	281.132	280.202	40.952	295.026	43.8399	528.259	292.791	242.393	197.654	324.595	88.233	336.56	142.826	149.914
Runx2	51.9302	4.17902	0.709846	5.88722	3.92737e-09	6.00305e-08	33.8258	75.0618	118.396	100.36	10.1734	20.7846	4.71425	70.1431	98.9114	123.094	22.1751	49.6501	1.67321	22.694	32.8994	46.327
Il34	149.994	2.536	0.430932	5.88493	3.98226e-09	6.08105e-08	63.6957	167.489	172.859	196.959	32.6515	180.608	20.2774	386.475	210.216	155.705	108.932	126.841	71.9701	148.68	157.712	198.835
Hars	932.13	-1.0201	0.173348	-5.88468	3.98814e-09	6.08414e-08	758.554	662.133	840.703	803.948	1731.31	820.963	1712.33	703.727	752.738	614.291	983.803	819.756	1270.43	872.293	748.821	818.274
Snrpn	269.669	-1.49581	0.2542	-5.88437	3.99571e-09	6.08979e-08	168.251	210.227	216.765	163.324	487.01	242.827	549.723	157.35	231.929	130.002	280.015	206.763	587.515	225.432	200.417	257.156
Vdr	140.656	2.70833	0.460384	5.88276	4.03481e-09	6.14344e-08	155.222	122.504	271.307	263.076	19.0324	77.1637	14.0217	264.364	122.681	167.8	204.011	103.662	86.9334	89.5744	121.121	168.029
Bcl2a1a	77.4942	6.30124	1.07134	5.88162	4.06258e-09	6.17975e-08	30.0307	66.5502	122.963	109.667	0	95.5984	2.4961	201.065	110.195	111.831	33.1287	97.7691	2.6578	80.6148	77.4359	97.9055
Atp5c1	2593.68	-0.721291	0.122713	-5.87786	4.15615e-09	6.31599e-08	2702.94	2134.11	2416.52	2231.7	4187.18	2270.42	3477.22	2196.22	2172.61	2096.62	2492.71	2579	3484.21	2280.24	2446.17	2330.99
Trpm5	63.3328	3.34411	0.569206	5.87505	4.22724e-09	6.41783e-08	79.4737	118.796	91.2614	114.52	13.7924	12.4669	10.697	134.136	84.8188	103.943	93.4653	13.4615	6.9554	8.11411	54.9707	72.4514
Pmpcb	922.787	-1.04406	0.177842	-5.87071	4.33928e-09	6.58159e-08	622.949	603.305	752.264	715.496	1860.02	867.954	1688.08	722.47	895.255	664.913	825.384	862.711	1229.38	800.921	842.083	811.414
Plod1	690.551	1.0727	0.182779	5.86885	4.38832e-09	6.64958e-08	531.633	808.507	881.523	1018.38	445.2	574.475	449.336	1198.67	828.48	587.19	707.565	613.129	506.676	703.134	585.449	609.464
Elmo1	286.868	1.74577	0.297511	5.86793	4.41272e-09	6.68012e-08	158.55	364.137	351.553	408.583	135.364	251.491	101.096	397.129	378.131	519.284	219.878	304.053	107.05	283.183	284.504	325.909
AF251705	136.482	3.7224	0.634416	5.86745	4.42561e-09	6.6932e-08	12.4588	165.048	201.672	183.686	24.151	149.11	10.1673	262.076	192.274	289.368	111.428	125.287	13.5324	185.632	136.965	120.864
Fam195a	136.475	-2.2913	0.390596	-5.86616	4.46002e-09	6.73878e-08	184.633	94.3497	71.0453	75.0352	392.642	103.483	282.06	81.6151	52.7693	20.8058	196.406	52.6449	356.145	89.9165	51.8985	78.1447
Mgst2	25.8285	6.81425	1.16187	5.86488	4.49465e-09	6.78459e-08	33.5773	22.2612	34.1295	36.1544	0	6.19296	0.462749	106.379	36.0277	50.3795	17.7126	7.50519	0	15.7461	18.3144	28.4121
Peg3	4664.88	1.65688	0.28252	5.86466	4.50048e-09	6.7869e-08	7024.26	7674.54	4330.48	5325.4	1155.02	3918.08	1899.95	3018.63	5813.69	4783.9	3933.79	4879.64	1341.76	4838.56	7537.7	7162.67
Ctsb	8934.62	1.23228	0.210143	5.864	4.5185e-09	6.80755e-08	4870.54	9130.02	11098.6	10841.3	4867.18	9004.97	5027.15	13469.7	10269.8	10966.2	7727.26	13098.6	4688.36	10993.6	8232.91	8667.78
Riok3	1626.82	-1.10104	0.187771	-5.86374	4.52549e-09	6.81157e-08	1958.67	1219.81	1438.21	1315.18	2880.25	1512.82	2618.41	938.303	1205.93	1163.04	1564.74	1513.33	2376.07	1421.09	1478.7	1424.57
Kdm1b	756.501	-1.91341	0.326544	-5.85957	4.64081e-09	6.97849e-08	458.297	559.85	539.288	502.933	1380.59	697.774	2043.85	180.398	483.518	471.558	724.083	655.898	1391.73	583.269	844.389	586.591
Shisa5	1647.76	1.081	0.184535	5.85797	4.68571e-09	7.03928e-08	1519.71	1687.03	1836.64	1907.7	898.795	1637.81	961.229	2811.52	1821.82	1868.17	1684.94	1962.25	1111.66	1801.89	1462.81	1390.17
Rnf187	1083.37	-1.16766	0.199384	-5.8563	4.73288e-09	7.10337e-08	1187.88	926.649	830.684	760.247	1747.13	1065.38	1609.99	923.169	721.697	564.357	1307.99	833.127	2097.01	975.645	845.204	937.737
Bckdhb	398.791	-2.19835	0.375451	-5.85524	4.76321e-09	7.14209e-08	664.133	232.722	203.937	150.686	914.245	313.378	829.5	177.25	283.176	129.844	278.999	271.566	1061.11	224.518	316.844	328.742
Rab15	89.223	5.12323	0.875129	5.85426	4.79145e-09	7.17762e-08	14.0464	129.263	106.078	156.198	6.2532	79.5087	0	142.367	182.833	172.5	43.5721	143.43	7.80186	73.8335	80.8244	89.0592
Rgs7bp	144.145	2.91728	0.498365	5.85371	4.80739e-09	7.19465e-08	68.9594	119.622	138.447	259.737	47.4333	77.8585	17.4727	242.143	304.975	468.131	53.2425	103.619	29.2358	81.6483	148.281	145.511
Impdh1	904.36	-1.58283	0.270501	-5.8515	4.87158e-09	7.27717e-08	869.949	712.489	683.269	718.875	1584.9	849.926	2301.88	478.941	527.925	364.586	1139.98	592.752	1520.43	868.886	515.187	739.784
Prss22	51.0349	7.59561	1.29806	5.85149	4.87176e-09	7.27717e-08	91.2044	90.1377	50.0961	72.5615	0	70.9596	0	201.065	44.2331	31.7289	42.0024	38.4391	0	27.9051	23.8898	32.3358
Kcne3	234.668	2.87814	0.491894	5.85113	4.88231e-09	7.28602e-08	86.093	250.952	310.64	319.362	105.122	98.0605	24.837	730.124	338.189	430.149	214.821	99.2061	44.3633	176.078	208.013	318.681
Spsb1	213.477	2.05031	0.350456	5.85042	4.90338e-09	7.31054e-08	315.246	247.79	246.767	306.479	80.9385	215.479	38.3333	385.264	154.373	263.613	183.167	247.177	81.6332	225.108	189.767	234.501
Arl4a	513.029	-1.43103	0.244749	-5.84692	5.00754e-09	7.45732e-08	759.424	402.107	377.71	357.522	838.283	495.927	1173.86	285.713	383.868	324.431	392.15	515.121	825.338	376.219	342.356	358.427
Armcx4	187.232	1.7714	0.302973	5.84672	5.01364e-09	7.45732e-08	85.6431	194.596	197.652	227.579	73.7851	194.153	54.9143	312.948	279.367	297.523	125.416	181.332	95.6809	172.598	253.726	248.806
Sh2d7	44.4639	7.29806	1.24825	5.84664	5.01603e-09	7.45732e-08	80.2722	71.586	93.3201	64.24	0	0	0	94.3579	48.4377	81.6737	45.58	0	0	6.04788	53.1978	72.7094
Col7a1	802.699	-2.30949	0.395027	-5.84641	5.02295e-09	7.45752e-08	1078.4	676.212	396.51	318.139	1511.75	737.002	1750.82	538.94	236.465	114.889	1239.09	568.28	2274.79	503.11	451.77	447.025
Wt1	149.692	2.64798	0.452931	5.84632	5.02563e-09	7.45752e-08	60.1556	194.954	131.109	178.996	59.0971	110.335	21.4756	269.938	243.045	246.022	115.791	165.474	22.5202	189.999	219.044	167.11
Gm20594	236.332	-1.52472	0.260833	-5.84557	5.04839e-09	7.48426e-08	173.511	104.459	159.397	172.334	724.675	124.179	356.943	211.334	172.276	201.296	186.94	162.949	465.115	140.559	233.131	192.218
Stat4	97.8635	2.15521	0.368804	5.84378	5.10284e-09	7.55786e-08	61.2271	96.6757	109.628	120.751	59.3696	114.022	16.3023	155.259	131.051	148.018	64.579	132.542	22.318	98.9607	116.902	118.211
Edem2	4659.21	-2.00793	0.343681	-5.84243	5.1446e-09	7.61255e-08	3681.15	3797.2	3540.64	2497.82	9727.33	5119.19	9390.55	1387.11	2411.37	1294.48	5648.48	3528.59	10550.7	4513.13	3584.69	3874.96
Art4	71.7385	3.11696	0.533605	5.84133	5.17849e-09	7.65552e-08	73.4084	68.235	113.855	173.983	21.0815	26.6099	17.4727	115.126	166.844	171.648	36.6782	19.2196	10.6312	22.7375	61.7839	48.5036
H2-DMb2	78.5139	3.45185	0.591326	5.83747	5.29997e-09	7.82777e-08	16.9	59.8555	136.084	164.484	13.9392	163.962	4.53657	102.161	107.665	115.604	48.9206	46.3213	16.9066	96.9221	64.4026	97.558
Abcb6	340.4	-1.83684	0.314699	-5.83679	5.32151e-09	7.85222e-08	440.398	206.117	210.221	199.139	860.254	299.943	558.746	207.517	225.474	106.377	278.638	219.682	842.119	287.776	262.519	241.477
Filip1l	703.422	1.47026	0.252012	5.8341	5.40826e-09	7.97275e-08	568.964	738.735	614.044	807.28	329.748	588.013	252.375	799.705	871.62	1508.46	508.119	737.813	255.421	834.941	1086.91	752.607
Lmcd1	146.634	2.94439	0.504912	5.83149	5.49357e-09	8.09095e-08	151.266	208.917	173.059	164.912	13.1759	128.122	24.961	471.314	151.324	217.941	115.359	73.5357	55.8138	114.721	112.859	168.864
Uchl3	339.224	-1.01062	0.173345	-5.8301	5.53937e-09	8.15079e-08	351.471	221.553	295.111	292.72	603.457	293.694	519.189	267.546	245.222	293.882	292.834	355.144	539.534	299.722	262.788	293.716
Wwtr1	780.312	1.14471	0.196464	5.82656	5.65812e-09	8.31776e-08	882.722	916.619	772.086	910.443	491.302	763.814	374.505	924.176	998.872	1205.71	661.432	714.113	357.728	779.759	960.657	771.046
F7	81.0225	7.37679	1.26611	5.82632	5.66624e-09	8.32193e-08	14.4592	33.6963	191.276	162.439	2.63518	69.9741	0	162.149	102.434	66.5786	75.1311	175.483	0	79.5813	82.3786	78.1447
Sc5d	615.916	-0.988483	0.1698	-5.82146	5.8337e-09	8.55989e-08	491.437	541.046	494.774	550.304	850.428	548.158	1193.18	396.317	536.488	510.913	603.062	540.931	895.457	567.23	625.002	509.933
Rgs3	263.666	1.66218	0.285761	5.81668	6.00264e-09	8.79959e-08	182.152	366.146	364.947	267.424	106.116	232.146	142.675	522.779	359.694	278.642	220.156	260.452	112.871	298.15	231.126	273.174
Mkl1	250.465	1.56941	0.270119	5.81008	6.24414e-09	9.12815e-08	320.971	314.291	287.287	277.802	111.349	347.855	91.715	368.577	225.87	245.165	308.01	185.394	90.2408	337.653	208.189	287.077
Myo7a	358.667	1.93294	0.332672	5.81034	6.23472e-09	9.12815e-08	291.999	387.049	308.072	413.086	192.483	275.438	141.411	846.328	593.23	452.477	365.841	291.201	93.0932	364.454	314.171	408.344
Slc12a7	403.35	1.5944	0.274413	5.81021	6.23946e-09	9.12815e-08	303.644	536.614	513.712	515.351	176.557	343.957	122.309	671.298	504.412	588.804	419.432	277.43	249.833	402.04	377.294	450.904
Hectd2	86.128	2.75832	0.474901	5.8082	6.31489e-09	9.22301e-08	31.1528	101.203	156.48	111.883	23.5664	82.1283	16.6267	98.6779	105.626	200.495	59.1905	72.5936	10.2695	71.7366	130.803	105.616
Gcat	1658.59	-1.93111	0.332489	-5.80804	6.32076e-09	9.22305e-08	2016.86	1404.14	1081.4	1000.44	3531.63	1385.14	3820.92	887.418	861.05	375.315	2055.95	778.346	3601.31	1304.97	1004.22	1428.35
Etv1	188.399	1.81951	0.313307	5.80744	6.34365e-09	9.23933e-08	89.4889	187.433	245.892	208.472	56.0142	127.584	79.5225	189.757	281.75	298.833	182.448	240.547	62.4482	189.278	296.843	278.077
Pde8a	390.848	-1.02894	0.177175	-5.80747	6.34238e-09	9.23933e-08	393.664	318.196	326.381	290.597	528.433	413.035	520.882	232.523	272.849	309.477	453.438	462.773	663.793	420.077	350.543	296.906
Wif1	90.6148	8.33785	1.43583	5.80699	6.36059e-09	9.25545e-08	25.2773	42.7944	76.7119	162.041	0	20.1744	0	157.518	221.414	646.408	11.072	8.0146	0	11.0533	36.1381	31.2201
Themis2	226.754	3.45508	0.595252	5.8044	6.45963e-09	9.3909e-08	20.0205	249.353	366.157	371.053	52.7037	371.552	22.4649	270.789	284.799	295.442	273.903	314.198	13.289	322.459	206.77	193.116
Gm10109	132.794	-2.966	0.511088	-5.80331	6.50175e-09	9.44341e-08	113.449	74.1319	62.8478	69.2632	366.29	94.6128	289.548	15.6744	42.681	17.6849	162.094	71.8645	454.484	129.19	68.3742	92.5162
Cd1d1	143.268	2.51564	0.433657	5.80098	6.59288e-09	9.56696e-08	52.05	164.674	179.235	208.698	54.6249	198.821	10.1482	144.113	196.646	167.976	105.621	191.153	38.6197	181.529	168.058	230.317
Cd14	371.114	2.36603	0.407922	5.80019	6.62383e-09	9.5942e-08	760.778	352.969	400.769	402.386	121.218	377.466	84.8675	803.179	392.666	621.053	284.552	294.143	85.0497	398.94	278.44	279.345
Gm14548	75.4426	3.29969	0.568884	5.80029	6.61993e-09	9.5942e-08	30.0307	64.023	112.944	145.948	18.4463	114.324	0	49.7257	103.987	68.139	62.7078	164.62	13.289	127.123	72.4931	59.2822
Nccrp1	106.574	4.43375	0.764479	5.7997	6.64323e-09	9.61347e-08	101.215	168.482	110.211	65.1404	7.90555	106.439	4.9922	130.8	142.011	47.8534	184.574	55.1518	2.6578	74.4136	215.008	288.327
Ms4a6b	352.007	2.32635	0.401129	5.7995	6.65121e-09	9.61618e-08	117.27	251.597	440.304	439.154	106.103	416.04	47.8118	428.013	513.581	699.575	317.043	634.965	116.033	550.002	289.689	264.934
Phlda3	142.87	2.40673	0.415029	5.79895	6.67307e-09	9.63895e-08	84.0171	150.548	154.387	243.067	24.2752	123.472	45.988	373.428	209.731	237.661	103.543	117.007	73.4507	100.92	115.348	129.079
Mapk6	750.236	0.849817	0.146556	5.79859	6.68752e-09	9.65097e-08	748.347	671.372	752.902	874.643	384.147	966.151	536.827	821.527	786.983	951.252	722.943	952.325	425.342	854.537	788.087	766.397
Rnf7	638.33	-0.872377	0.150484	-5.79713	6.74603e-09	9.7265e-08	654.18	482.329	565.575	511.354	1057.25	573.675	1005.01	585.718	480.401	506.955	658.459	527.066	880.171	605.259	529.658	590.228
E030010N08Rik	139.469	8.02427	1.38453	5.79567	6.80497e-09	9.80252e-08	1.11225	194.596	288.736	267.983	0	114.324	0	192.958	218.837	197.655	146.121	149.578	2.6578	156.062	109.563	191.32
Stac2	48.2557	7.24801	1.25084	5.79452	6.85168e-09	9.86079e-08	17.2165	68.2282	56.4127	57.4353	0	56.3447	0	110.212	65.0695	67.8997	31.0028	55.7361	0	69.92	47.0965	69.5174
Cyp4f16	187.993	1.38536	0.239125	5.79348	6.89421e-09	9.90936e-08	234.474	203.795	207.102	189.479	90.0198	200.338	103.542	254.605	263.684	205.024	171.541	189.094	70.8791	259.918	188.334	176.058
Pex11g	261.47	-2.15686	0.372296	-5.79339	6.89801e-09	9.90936e-08	133.293	276.367	148.248	124.772	551.819	247.907	517.103	131.354	120.978	62.6444	346.877	187.891	686.997	237.518	183.846	225.91
Sdcbp2	81.4108	4.41003	0.761464	5.79152	6.97534e-09	1.00113e-07	245.807	86.768	86.5296	90.7019	5.27037	91.6562	7.48831	182.688	79.1539	110.271	63.2994	80.2208	2.6578	66.1455	42.8369	61.0786
Yipf5	1324.28	-1.21374	0.209722	-5.78734	7.15096e-09	1.0254e-07	1160.08	1033.63	1062.04	1147.79	2374.3	1132.4	2541.03	669.676	957.607	949.265	1457.07	1306.1	1754.15	1207.15	1170.6	1265.59
Cnpy4	227.315	1.88039	0.324943	5.78683	7.17272e-09	1.02759e-07	101.839	224.76	258.36	286.038	119.343	185.327	68.8094	385.715	350.842	364.382	192.647	279.14	73.2669	248.277	284.285	214.005
Slc52a3	115.958	2.17081	0.375391	5.7828	7.34682e-09	1.05158e-07	116.724	152.121	131.528	125.583	34.7439	145.537	46.4273	262.163	148.041	101.584	139.94	71.5083	30.9005	135.198	100.553	112.771
Bst1	112.574	2.89045	0.499938	5.78162	7.39865e-09	1.05803e-07	76.4233	133.142	154.273	179.657	34.3949	95.77	40.4352	215.507	188.825	174.827	72.1071	179.303	7.37251	90.0765	89.3675	69.7094
Mfap5	1346.13	2.32413	0.402045	5.78077	7.43607e-09	1.06242e-07	467.741	1440.86	1676.67	1837.26	656.466	1137.06	187.687	3373.85	2159.54	1949.85	836.398	1239.07	515.293	1442.97	1430.75	1186.7
Macrod1	234.298	-2.00566	0.347049	-5.77918	7.50658e-09	1.07152e-07	517.196	210.602	134.804	105.544	534.942	174.442	346.958	117.828	122.611	56.1757	284.552	136.208	566.112	171.565	112.035	157.188
Arhgef17	327.912	1.43188	0.247826	5.77775	7.57047e-09	1.07967e-07	478.267	456.585	326.991	374.351	144.935	328.188	139.782	455.639	457.851	444.204	288.693	241.498	164.784	270.783	294.091	379.945
Zfp36l2	1371.87	1.41446	0.244833	5.77725	7.59312e-09	1.08192e-07	1663.92	1415.25	1634.95	1771.98	735.216	1438.9	678.94	1674.46	1693.27	2334.93	1177.25	1591.88	491.693	1239.19	1313.11	1094.92
Fut11	329.635	1.28542	0.222589	5.77485	7.70202e-09	1.09644e-07	238.021	288.104	389.839	437.018	197.639	286.795	149.766	461.585	485.788	577.361	266.212	237.32	199.335	325.56	388.003	345.813
Npr3	75.9267	3.81632	0.661023	5.77335	7.77121e-09	1.10529e-07	50.0512	70.7623	96.5488	155.018	5.27037	39.422	4.9922	150.258	136.579	209.618	15.9727	71.8645	18.6046	37.2068	70.0218	82.6358
Mrps24	344.104	-1.35333	0.234504	-5.77103	7.87881e-09	1.11959e-07	262.352	278.349	269.41	238.886	744.432	317.057	584.675	335.971	215.278	152.83	349.322	235.193	704.465	308.98	231.262	277.195
Fam83e	55.2082	3.92009	0.679407	5.76987	7.93345e-09	1.12634e-07	75.6329	80.0288	81.0645	86.579	0	34.4943	9.98441	152.42	44.2331	92.5858	52.0593	27.5759	7.97341	28.9386	57.665	52.0965
Fkbp11	1577.29	-2.81058	0.487209	-5.76875	7.98615e-09	1.1328e-07	350.358	1112.82	737.778	794.054	4519.34	1192.52	4690.18	438.343	698.417	217.941	1486.65	600.82	4829.23	1275.37	1017.38	1275.47
Actg1	13389.4	1.36385	0.23647	5.76755	8.04345e-09	1.1399e-07	13522.6	12823.2	15905	15914.1	9151.8	15585.7	4437.03	24505.7	14923	15861.3	11881.4	13576	7174.78	15016.5	11875.4	12077.2
Tmem132c	54.5018	4.7152	0.817641	5.76683	8.07754e-09	1.1437e-07	12.2083	75.3723	130.804	117.575	6.22638	49.6	1.52673	119.715	64.4752	96.9437	25.9188	28.7234	6.27983	34.029	63.1955	39.4352
Tasp1	208.711	-1.38994	0.241071	-5.76568	8.13303e-09	1.15052e-07	180.584	143.175	163.125	183.826	392.527	172.266	459.475	96.7907	168.581	122.466	174.347	178.832	346.995	200.787	168.407	187.192
Adam15	620.853	1.59615	0.276864	5.76511	8.16031e-09	1.15335e-07	426.943	551.533	765.557	781.611	444.815	816.813	283.572	1413.72	791.709	609.703	540.609	607.926	210.108	605.858	570.306	512.869
Hdac1	717.516	1.03122	0.178883	5.76479	8.1759e-09	1.15452e-07	598.942	755.848	847.609	856.782	481.459	698.315	404.037	1120.87	772.932	944.94	578.419	754.528	436.383	759.498	729.024	740.663
F2rl1	240.055	2.34046	0.406016	5.76445	8.19267e-09	1.15585e-07	384.838	187.015	272.34	320.755	50.0685	224.705	102.34	472.935	342.224	480.614	139.614	168.798	55.8138	188.101	230.66	220.063
Plxna4	252.812	2.28274	0.396033	5.76401	8.21382e-09	1.1578e-07	97.8779	363.92	376.176	486.492	97.5018	232.59	74.8831	292.95	377.145	457.208	211.787	195.538	63.7872	221.174	296.563	199.404
Hamp2	281.289	-3.32117	0.576885	-5.75708	8.5582e-09	1.20526e-07	514.971	104.459	143.912	93.1755	1191.1	136.991	566.615	46.4828	76.0498	19.2454	180.433	91.9197	932.888	149.861	98.0305	154.493
Gm15280	293.381	2.80172	0.486739	5.75612	8.60696e-09	1.21105e-07	907.595	202.178	329.723	369.404	73.7851	251.315	29.9532	475.097	429.138	371.384	249.057	277.43	69.1029	307.99	211.713	139.223
Tmem219	343.194	-1.225	0.21298	-5.75172	8.83386e-09	1.24186e-07	391.633	257.104	285.107	181.305	596.057	290.952	475.831	265.277	274.563	248.265	329.559	349.474	694.862	289.495	269.34	292.277
Coa3	644.647	-1.52236	0.264713	-5.751	8.87192e-09	1.2461e-07	330.338	529.875	484.566	378.474	1167.39	606.113	1497.66	551.307	440.003	291.281	667.897	430.351	1331.56	574.639	487.681	545.217
Fkbp2	532.994	-1.56284	0.271915	-5.74755	9.05434e-09	1.27059e-07	466.647	447.57	385.846	303.228	942.302	508.604	1158.82	464.516	309.026	187.581	580.537	329.37	1141.86	495.563	385.791	420.648
Mcts1	310.881	-1.03064	0.17939	-5.74525	9.17852e-09	1.28687e-07	192.452	223.516	235.169	243.398	609.623	242.024	454.125	295.585	280.36	361.552	227.43	277.541	557.742	239.79	252.885	280.911
Nkiras1	105.798	-1.26812	0.220767	-5.74413	9.23957e-09	1.29428e-07	79.6409	92.79	102.909	67.9011	212.589	73.9389	163.419	67.5171	78.9911	96.9918	82.9206	98.4214	190.979	94.8833	90.9908	97.8867
Ccl17	28.1524	7.26197	1.26441	5.74336	9.28164e-09	1.29902e-07	34.4797	14.3209	49.1852	64.3159	0	11.8266	0	111.883	66.7376	21.8461	12.4232	8.35633	0	18.6034	14.0044	22.4554
Dse	406.141	1.96173	0.341975	5.73646	9.66732e-09	1.35126e-07	150.154	480.173	489.12	566.474	163.381	408.018	107.332	511.31	541.661	774.496	291.059	547.34	135.548	470.253	471.205	390.724
Ptn	1164.8	4.31735	0.752626	5.73638	9.67205e-09	1.35126e-07	55.6124	1432.09	1470.09	1697.77	108.042	1067.35	19.9688	1500.42	1695.6	1738.32	1228.72	1319.47	111.628	1680.51	1679.7	1831.46
Sell	108.577	3.77335	0.658139	5.73336	9.84609e-09	1.37435e-07	42.3695	47.8496	95.0907	78.0012	4.31466	117.871	13.5836	157.451	186.098	125.261	63.3309	491.328	14.9698	174.149	66.4447	59.1183
Brsk2	220.805	-3.42249	0.597051	-5.73233	9.9061e-09	1.38073e-07	393.461	213.89	57.0066	62.8457	342.946	189.314	643.754	13.6521	63.3386	19.3168	309.622	79.1468	588.255	218.455	141.904	195.972
Ncam1	132.293	3.05996	0.533812	5.73227	9.90929e-09	1.38073e-07	54.8795	166.946	149.533	181.232	39.3152	84.8537	13.1729	422.515	197.911	265.143	59.093	105.615	34.6551	101.902	134.469	105.458
Abcd3	1528.82	-0.849934	0.148298	-5.73126	9.96846e-09	1.38775e-07	1311.34	1296.47	1379.01	1339.09	2213.55	1427.08	2226.52	912.9	1366.57	1447.56	1458.84	1509.15	2309.63	1323.94	1524.83	1414.69
Abca1	2023.78	1.96488	0.342883	5.73046	1.00158e-08	1.39311e-07	3359.54	2489.17	2039.48	2571.8	641.306	1909.07	379.955	1251.04	3261.16	2978.4	1262.46	2414.29	731.721	2239.52	2582.9	2268.64
Areg	53.1908	7.25682	1.26649	5.72988	1.00503e-08	1.39667e-07	107.888	62.3382	43.7202	79.158	0	60.1186	0	123.774	44.2331	78.0218	47.3267	76.0426	0	55.8102	31.3039	41.3179
Pah	2037.61	-2.84217	0.496081	-5.72925	1.00873e-08	1.39976e-07	1263.51	1067.33	1280.64	1387.74	7075.47	938.244	7151.33	219.982	533.125	378.145	2249.2	1418.91	4167.43	1324.98	1094.81	1050.91
Zfp36l1	1416.56	1.35323	0.236199	5.7292	1.00903e-08	1.39976e-07	1843	1845.72	1542.05	1539.46	632.444	1716.83	791.264	1911.2	1515.56	2160.68	1138.8	1341.19	486.378	1169.95	1562.72	1467.68
Fosl2	952.367	1.81947	0.317712	5.72679	1.02352e-08	1.41861e-07	1989.81	988.145	1049.28	1093.37	424.264	1066.37	214.665	1179.37	1132.99	1368.5	708.717	758.755	308.305	1057.29	963.005	935.042
Aim2	62.0586	3.38598	0.591521	5.7242	1.03924e-08	1.43913e-07	44.1761	82.0699	63.2267	107.306	3.16093	51.5486	23.8495	68.9058	126.713	85.0203	36.3869	104.277	6.24549	67.3598	80.8296	41.8626
Larp1b	725.669	-1.67625	0.292861	-5.72371	1.04221e-08	1.44198e-07	875.525	409.765	624.542	527.07	1635.83	634.069	1543.87	279.214	489.657	298.604	672.512	629.367	1417.43	556.896	491.212	525.142
1110032A03Rik	287.012	-1.20151	0.209999	-5.72147	1.05603e-08	1.45983e-07	272.208	267.405	259.717	184.953	496.008	258.531	529.884	167.999	230.238	183.245	229.384	254.086	423.864	285.371	251.259	298.044
Aagab	602.041	-0.844374	0.147586	-5.72124	1.05752e-08	1.4606e-07	540.553	567.783	545.592	433.72	806.366	609.07	821.218	433.479	516.052	440.563	619.979	579.094	967.44	637.684	543.699	570.367
Ap1s2	341.073	2.09537	0.36635	5.7196	1.06774e-08	1.47343e-07	95.4901	230.979	428.392	545.491	170.189	328.164	101.883	714.338	523.719	651.388	244.141	368.148	117.441	310.431	380.732	246.235
Cisd1	277.032	-1.5299	0.267505	-5.71913	1.0707e-08	1.47622e-07	393.736	181.96	187.633	149.246	542.848	225.691	461.779	252.412	187.021	129.516	254.381	223.114	680.397	207.738	176.29	178.745
2020-09-15	4202.35	-0.795549	0.139123	-5.7183	1.07594e-08	1.48214e-07	2875.12	3529.28	3825.26	3885.12	6064.05	3761.43	7350.62	3061.5	3763.76	3826.29	3648.94	4070.62	5502.45	3837.56	4042.97	4192.55
Agtr2	196.654	5.90828	1.03331	5.71783	1.07896e-08	1.48371e-07	2.71839	91.1059	194.022	243.2	12.881	193.788	1.52515	159.416	623.067	213.075	77.5484	369.698	0	338.701	404.951	220.77
Postn	3735.15	2.75358	0.481572	5.7179	1.07847e-08	1.48371e-07	743.63	4382.93	4865.45	6473.8	1588.27	2796.5	289.946	6191.97	5855.19	5693.88	2422.23	3800.93	725.959	4218.48	5297.59	4415.7
Rims1	34.3414	-3.18543	0.557126	-5.7176	1.08037e-08	1.48435e-07	13.5657	50.1434	9.59554	12.5619	57.4997	43.0576	89.5293	2.7447	7.89164	12.4078	39.6418	46.3881	69.5568	34.708	22.6596	37.5107
Inhbb	165.04	2.50608	0.438383	5.71666	1.08641e-08	1.49135e-07	228.011	154.161	146.645	232.527	50.0685	199.081	24.961	283.761	244.446	321.97	168.01	186.346	45.1826	148.827	98.8543	107.786
Cryab	138.195	-1.69078	0.295864	-5.7147	1.09896e-08	1.50727e-07	88.9799	112.04	105.657	67.6141	274.059	127.136	354.447	129.179	103.21	89.465	66.8489	81.8921	356.145	117.822	48.6034	88.0251
Tnfsf8	51.2222	7.41403	1.29781	5.71274	1.11172e-08	1.52345e-07	6.67349	45.49	68.3128	78.3334	0	31.5376	0	106.478	72.1697	125.355	31.3539	95.2622	0	51.6761	49.4271	57.4858
Odc1	2708.49	-1.29968	0.227552	-5.71157	1.11937e-08	1.53259e-07	1748.45	1994.82	2364.53	2304.65	4738.06	2416.57	5780.97	1390.7	2065.76	1507.38	2860.3	2603.83	4478.4	2597.24	2173.97	2310.21
Cebpg	1040.94	-0.761418	0.133377	-5.70876	1.138e-08	1.55675e-07	939.135	871.303	811.249	922.339	1401.88	922.254	1332.59	779.786	893.613	1037.78	1046.97	1140.08	1596.59	1135.1	921.471	902.909
Chchd3	759.631	-0.969761	0.169925	-5.70698	1.14996e-08	1.57174e-07	813.278	610.236	739.89	629.64	1254.67	646.968	1238.68	527.185	611.305	541.636	602.348	824.716	1185.86	630.892	658.781	638.011
Relb	117.773	2.3608	0.413992	5.70251	1.18054e-08	1.61214e-07	75.1737	147.808	143.855	106.68	32.4836	180.598	38.4307	284.526	136.231	141.278	93.1391	117.288	27.3032	143.142	102.332	114.097
Mgl2	522.378	2.44589	0.428928	5.70233	1.18184e-08	1.61252e-07	64.9355	392.39	763.279	911.142	148.108	732.414	184.478	927.36	727.061	619.774	484.041	589.428	126.442	636.635	536.774	513.784
Map4k1	65.661	3.52761	0.618763	5.70107	1.19061e-08	1.62308e-07	33.3675	74.1319	53.7394	103.895	2.63518	127.136	2.4961	96.2085	106.315	88.4247	69.8068	91.084	18.6046	59.9443	62.6077	60.1804
Ssc5d	276.703	2.43339	0.426869	5.70054	1.19427e-08	1.62667e-07	73.4084	418.677	379.819	432.895	71.1499	224.705	64.8987	529.687	439.227	384.387	265.029	192.196	111.628	304.889	256.197	278.447
Bcl2a1d	64.6899	7.04268	1.2361	5.69749	1.21584e-08	1.65462e-07	28.9185	41.278	81.0645	144.298	2.63518	95.5984	0	170.797	93.1223	84.2635	26.0297	110.304	0	72.3466	50.2509	34.1322
Agt	137.045	2.79655	0.490938	5.69635	1.22403e-08	1.66289e-07	275.838	223.238	121.141	98.1229	21.0815	179.37	4.9922	122.693	117.179	53.0548	215.928	162.949	23.9202	252.18	125.215	195.811
Cald1	1966.95	1.35051	0.23708	5.69645	1.22328e-08	1.66289e-07	1616.92	2131.41	2255.85	2415.79	952.73	1867.25	682.989	2480.53	2423.14	3869.92	1959.5	1844.39	1191.4	1629.44	2116.9	2032.96
Atp11a	1403.34	0.866052	0.152055	5.69566	1.22893e-08	1.66775e-07	1755.97	1470.87	1368.41	1893.45	751.106	1581.22	872.545	1500.74	1432.45	1535.02	1761.15	1445.24	924.842	1357.94	1307.96	1494.51
Gmppa	977.847	-1.48385	0.260529	-5.69555	1.22973e-08	1.66775e-07	659.483	967.783	673.942	695.332	1950.75	860.823	1800.14	694.694	617.192	385.52	1328.64	697.657	1873.61	870.079	709.599	860.317
Lepre1	322.756	1.94334	0.341256	5.69466	1.23618e-08	1.67506e-07	121.678	448.369	442.903	417.842	152.894	269.491	97.7859	582.198	416.928	458.197	307.244	267.744	111.42	306.62	393.177	369.605
Gas6	3034.25	1.41365	0.248275	5.69387	1.24191e-08	1.68138e-07	2367.98	4122.74	3321.82	3847.41	1712.87	3009.87	1295.48	5583.34	4094.28	4021.24	3196.32	2250.36	1735.54	2901.1	2533.96	2553.63
Endod1	471.815	1.66289	0.292102	5.69283	1.2495e-08	1.6902e-07	311.43	473.433	547.413	621.72	247.707	379.437	152.262	962.626	595.982	825.99	415.291	463.777	247.176	379.303	513.218	412.281
Lmo2	189.361	1.5888	0.279134	5.69187	1.25653e-08	1.69825e-07	100.977	188.744	225.654	229.924	90.239	203.459	55.2308	274.458	275.609	278.276	154.791	243.639	107.241	199.206	205.472	196.854
Slc15a3	91.5294	3.27599	0.575763	5.68983	1.27168e-08	1.71726e-07	33.3531	129.14	78.1412	107.302	15.2409	125.337	12.0304	187.068	78.3245	117.977	143.167	115.186	7.68587	105.603	94.4953	114.419
Ndufs6	469.323	-1.4821	0.260525	-5.6889	1.2786e-08	1.72512e-07	351.607	339.135	296.038	288.368	978.407	453.284	880.743	457.711	295.745	207.83	521.239	311.535	948.26	442.266	346.348	390.658
Slc25a4	914.563	1.16601	0.204975	5.68856	1.28118e-08	1.72713e-07	664.965	880.46	1017.87	1051.46	570.743	862.677	505.741	1727.96	1180.37	1111.4	845.533	978.326	588.905	887.132	915.945	843.53
Sh3bgrl3	1206.46	1.79693	0.315931	5.68774	1.2873e-08	1.73389e-07	1779.25	1077.15	1350.22	1585.78	738.087	1231.24	328.171	2958.37	1401.88	1043.64	1062.5	1081.4	509.551	1368.45	836.522	951.164
Cd300a	164.561	3.12077	0.548728	5.68727	1.29089e-08	1.73724e-07	44.5202	283.164	249.981	106.421	34.0765	200.361	26.8998	249.351	245.483	210.124	113.531	324.211	13.0934	260.465	134.1	137.196
Clps	173011	-2.84898	0.501043	-5.6861	1.29971e-08	1.74762e-07	170491	129978	91438.1	74215.5	496882	153086	376280	49764.1	50716.6	13741.1	208417	50038.4	564950	127775	81739.6	128655
Smim19	242.961	-0.911233	0.160337	-5.68323	1.32172e-08	1.7757e-07	183.006	216.363	197.385	192.752	420.366	206.654	345.59	232.19	205.54	193.606	210.976	248.157	405.309	203.42	231.415	194.65
Myo5a	773.111	1.70648	0.300432	5.68008	1.34634e-08	1.80724e-07	553.191	828.715	902.796	972.721	499.484	938.658	222.112	905.658	975.8	1159.07	669.062	1097.56	158.111	890.298	760.171	836.366
Rab39b	91.9923	-3.08765	0.543809	-5.67782	1.36422e-08	1.82969e-07	44.4899	48.0173	34.6118	52.772	242.437	56.1764	391.888	9.72895	34.9208	14.5641	85.188	39.2748	201.993	81.6483	65.9029	68.2644
Pex7	329.169	-0.969339	0.17085	-5.67364	1.39794e-08	1.87331e-07	299.394	259.389	298.635	237.027	373.207	330.357	625.155	246.522	257.682	282.97	272.922	352.531	524.891	335.621	284.897	285.508
St8sia3	223.638	5.56933	0.981924	5.67185	1.4126e-08	1.89032e-07	62.9509	112.072	415.125	492.969	42.0749	15.7189	0.776558	414.429	263.383	1090.89	61.3373	13.5611	0.826865	13.3944	336.763	241.941
Tm7sf3	446.177	1.42433	0.251125	5.6718	1.41304e-08	1.89032e-07	338.792	680.856	456.502	561.294	186.624	441.033	145.046	496.635	540.393	610.469	401.025	529.601	244.694	412.418	515.646	577.81
Jmjd8	966.36	-1.33528	0.235504	-5.66987	1.42905e-08	1.91013e-07	590.378	940.484	825.138	679.711	1413.09	941.132	2110.3	668.275	604.934	501.938	1033.04	813.749	1731.49	986.585	761.159	860.347
Relt	75.0924	4.33942	0.765573	5.6682	1.44309e-08	1.92726e-07	20.3384	66.2888	209.647	110.616	5.35103	94.8515	2.53574	114.393	68.5858	67.2823	83.4703	56.5616	20.8337	127.692	83.9462	69.0849
Glg1	2418.39	0.964332	0.170135	5.66803	1.4445e-08	1.92751e-07	3005.78	2904.63	2809.1	3061.05	1344.01	2447.56	1430.62	2016.32	2723.12	3210.33	2086.91	2495.01	1302.05	2323.61	2766.75	2767.42
Celf2	667.775	1.40926	0.248668	5.66723	1.45123e-08	1.93485e-07	629.632	576.529	767.077	1024.62	323.222	879.781	201.916	476.877	750.397	925.322	512.43	888.283	329.744	845.603	871.278	681.688
Kcnab2	126.096	2.87845	0.508059	5.66558	1.46526e-08	1.9519e-07	67.4726	159.376	177.613	273.45	39.5279	145.596	4.98622	177.811	186.244	140.06	100.132	125.345	51.6048	160.828	139.352	68.1421
Bckdk	2004.42	-2.00371	0.35371	-5.66484	1.47158e-08	1.95728e-07	1591.36	1882.67	1360.08	1077.59	3896.63	2048.49	4288.86	702.261	1142.78	472.05	2617.22	1193.23	4691.53	1999.47	1464.12	1642.41
Eme2	265.722	-1.27061	0.224299	-5.66482	1.47178e-08	1.95728e-07	247.805	281.78	194.855	161.969	437.336	243.012	446.204	168.848	214.104	134.274	319.207	197.822	453.313	278.611	230.497	241.922
Sgpp1	881.539	-1.15393	0.203799	-5.66208	1.49546e-08	1.98495e-07	732.972	634.333	763.282	817.966	1275.43	785.484	1941.97	474.016	685.225	797.382	824.075	794.687	1350.16	785.477	749.645	692.524
Ticam2	80.6101	3.50653	0.619312	5.66198	1.49636e-08	1.98495e-07	15.49	73.9336	107.138	149.825	13.107	112.367	17.9385	100.544	115.991	152.112	75.9149	108.006	0	97.6709	73.1947	76.5294
Trabd	1680.35	-2.02636	0.35788	-5.66213	1.49506e-08	1.98495e-07	2388.83	1480.14	1033.35	924.788	3319.25	1611.86	3625.27	570.231	866.904	429.107	2303.38	785.195	3425.24	1496.73	1088.33	1537.04
Pomgnt1	901.443	-1.28554	0.227095	-5.66078	1.50687e-08	1.9972e-07	478.86	689.804	821.172	639.228	1586.89	818.905	1868.02	626.724	668.732	539.863	992.453	706.461	1581.15	919.014	745.685	740.142
Mdk	110.566	3.02538	0.534486	5.66035	1.51062e-08	2.00049e-07	45.3217	149.686	131.305	199.652	8.05312	79.2814	22.8841	369.432	131.23	122.605	102.841	44.3987	45.8692	80.1086	109.969	126.417
Nbl1	697.2	1.78619	0.315648	5.65879	1.5244e-08	2.01704e-07	1343.49	980.983	672.116	940.747	319.328	620.442	215.313	1500.33	814.306	722.033	642.838	410.807	319.451	609.462	488.216	555.334
Mettl1	405.487	-1.13184	0.200044	-5.65797	1.53175e-08	2.02507e-07	549.687	401.05	329.198	314.155	649.134	377.406	627.782	232.072	270.247	249.913	462.48	317.375	600.883	332.122	377.593	396.698
Ppp1r15b	2591.45	-1.31988	0.23333	-5.6567	1.54314e-08	2.03842e-07	2353.66	1788.66	2039.58	2215.55	5693.53	1995.08	4056.6	1162.83	1943.85	1947.09	2777.1	2647.69	4030.9	2240.18	2408.05	2162.9
2410002F23Rik	807.644	-0.826469	0.146134	-5.65557	1.55326e-08	2.05007e-07	1016.9	903.987	621.934	680.773	1028.16	716.473	1348.45	581.081	620.198	634.025	830.491	710.527	962.545	818.949	703.201	744.601
Chac1	346.33	-3.49093	0.617315	-5.65503	1.55819e-08	2.05485e-07	112.337	388.35	148.467	104.719	624.538	300.593	871.14	26.4844	32.5928	47.3332	619.979	523.107	1129.57	214.973	177.938	219.165
Adamtsl1	324.081	2.15081	0.38079	5.64827	1.6207e-08	2.1355e-07	175.232	462.738	477.781	368.823	123.976	303.726	128.485	391.214	601.106	620.677	324.355	268.064	64.522	261.82	248.307	364.47
Sil1	798.656	-1.28001	0.226664	-5.64716	1.63117e-08	2.14751e-07	780.799	787.651	624.835	562.352	1278.06	731.278	1362.87	534.552	518.381	332.893	983.803	655.137	1437.87	785.477	681.271	721.267
Otud3	307.038	-1.84232	0.326319	-5.64577	1.64445e-08	2.16318e-07	553.9	243.456	167.594	156.667	534.942	352.827	504.213	121.612	175.38	114.432	407.009	175.483	629.899	317.291	220.775	237.129
Glb1l	127.083	1.84779	0.327298	5.64559	1.64615e-08	2.16361e-07	119.589	141.787	108.157	148.275	35.9201	159.869	37.229	174.91	177.621	230.34	95.9181	146.257	55.3246	127.457	135.041	139.626
Bcar1	204.477	9.37485	1.66158	5.64212	1.67974e-08	2.20501e-07	492.726	190.384	246.837	333.123	0	327.203	0	446.451	241.342	117.553	333.061	0	0	116.788	224.07	202.098
Tmem119	157.623	2.52854	0.448161	5.64204	1.68045e-08	2.20501e-07	84.5948	195.458	197.228	189.73	68.4997	128.093	16.8219	435.075	183.79	164.54	129.287	214.451	46.0585	209.776	143.551	115.013
Derl2	669.87	-1.00023	0.177321	-5.6408	1.6926e-08	2.21911e-07	501.204	484.193	549.397	629.464	913.334	577.95	1392.63	509.661	490.322	556.939	636.003	665.987	965.716	583.895	623.421	637.805
Lrrc32	341.623	1.77366	0.314537	5.63896	1.71075e-08	2.24105e-07	441.563	519.766	328.812	390.018	105.407	317.347	182.215	797.233	424.482	337.574	355.541	249.854	138.206	324.526	237.25	316.172
Stard7	1372.83	-1.2579	0.223114	-5.63793	1.72109e-08	2.25271e-07	1897.93	1022.1	1057.59	1118.55	2366.4	1183.1	2634.66	704.738	1068.19	907.94	1296.57	1082.53	2077.81	1156.59	1250.3	1140.24
Tmed10	2898.71	-1.08445	0.192735	-5.62666	1.83728e-08	2.4028e-07	3068.69	2542.39	2274.36	2283.21	4624.75	2776.3	4837.45	2171.72	2143.36	1475.13	3435.92	2271.25	4648.5	2594.14	2404.63	2827.58
S100a14	82.3924	7.17028	1.27452	5.62587	1.84573e-08	2.41185e-07	117.977	106.443	87.4367	81.2838	0	108.245	0	262.279	98.1184	137.977	58.624	73.0009	2.5833	78.3549	56.1772	49.7776
Ptgir	79.2657	2.83657	0.504248	5.62535	1.85136e-08	2.4152e-07	26.6882	92.6766	117.248	138.692	8.24748	165.057	20.8325	104.839	102.663	96.1671	60.3764	81.0752	19.4093	92.7274	71.5417	70.0096
Tshz3	89.1738	2.23315	0.396974	5.62543	1.85051e-08	2.4152e-07	112.494	98.437	128.874	160.316	38.8142	58.0656	24.5104	131.695	122.684	186.485	75.5176	40.2069	23.4884	56.8325	88.9807	79.3801
Gm3883	35.628	6.89261	1.22539	5.62481	1.85712e-08	2.42071e-07	24.4695	41.278	44.631	75.8597	0	40.4076	0	49.1853	57.4254	61.3771	28.9876	34.261	0	41.3409	31.3039	39.5215
Col10a1	70.4743	7.05128	1.2539	5.62349	1.87133e-08	2.4352e-07	2.2245	16.0058	183.989	366.106	5.27037	4.92775	0	285.383	85.3621	111.831	5.91583	0.835633	0	0	14.8281	44.9108
Vti1b	738.334	-0.890583	0.158366	-5.62357	1.87055e-08	2.4352e-07	608.543	606.15	577.339	601.963	1529.27	662.117	1047.07	702.612	688.99	637.542	598.401	746.307	1005.82	647.092	591.619	562.514
Ppapdc1b	1284.95	-1.77995	0.316531	-5.62331	1.87334e-08	2.4358e-07	849.352	1080.6	931.154	883.619	2543.42	1269.87	2820.31	415.626	844.565	507.605	1291.96	883.621	2550.08	1253.48	1176.73	1257.19
Mast4	584.851	1.15689	0.20576	5.6225	1.8821e-08	2.44518e-07	450.864	585.219	843.767	798.249	316.739	549.794	323.838	594.21	770.501	806.448	659.998	606.537	370.967	567.352	574.59	538.542
Manf	3254.56	-1.44159	0.256445	-5.62143	1.89387e-08	2.45844e-07	2800.43	1973.91	2663.87	2738.86	7301.6	2557.07	7496.44	1998.06	1977.9	1694.07	3165.48	2636.66	4304.65	2760.66	2812.4	3190.97
Slc6a8	326.553	1.52617	0.271582	5.61953	1.91478e-08	2.48354e-07	393.086	418.609	404.477	402.624	191.585	337.588	114.619	476.808	348.953	472.48	268.633	372.415	122.691	211.279	307.597	381.405
Adrbk2	262.404	1.44168	0.256642	5.61748	1.93761e-08	2.51109e-07	236.909	336.963	253.213	209.439	84.3258	337.058	79.8753	202.686	314.288	294.922	332.47	283.28	106.312	295.588	424.25	406.892
Nab2	168.303	1.95663	0.348345	5.61692	1.9439e-08	2.51711e-07	192.557	253.628	215.209	147.054	49.9009	268.039	80.9253	294.581	216.966	184.501	169.209	142.226	40.6887	165.754	127.632	143.98
Tulp3	187.908	1.67716	0.298597	5.61678	1.94546e-08	2.51711e-07	205.072	173.006	222.742	254.301	117.459	208.986	50.3074	320.174	222.398	294.108	168.2	133.319	74.5193	180.908	175.67	205.358
Ctnna1	3659.5	0.889534	0.158413	5.61527	1.96255e-08	2.53714e-07	4299.95	3521.27	4102.41	4427.9	2627.28	3623.87	2234.01	4795.83	4010.47	5083.38	3334.16	3589.05	2158.14	3572.89	3736.69	3434.78
Cldn8	293.658	-2.39865	0.427246	-5.61421	1.97464e-08	2.55068e-07	540.553	227.45	121.141	106.369	279.329	291.723	868.644	54.5902	138.907	123.795	243.732	298.321	512.956	327.627	275.968	287.429
Suclg2	1520.47	-1.08582	0.193453	-5.6128	1.9908e-08	2.56946e-07	1678.38	1245.08	1366.26	1193.97	2366.39	1371.89	2795.63	825.339	1167.91	1114.15	1461.8	1282.7	2081.06	1341.51	1516.59	1518.88
Ces1e	163.623	-2.5521	0.45473	-5.61234	1.99606e-08	2.57219e-07	190.062	107.952	102.693	78.2874	385.033	165.746	274.703	18.3002	53.3783	51.6742	163.718	159.954	443.262	147.448	140.223	135.533
Tmem167	1158.72	-0.870018	0.155019	-5.61233	1.99618e-08	2.57219e-07	924.375	847.445	1032.91	1104.62	1914.14	1027.59	2130.8	895.94	957.178	1018.79	1111.25	1064.76	1422.41	978.778	1084.42	1024.19
Slc13a3	58.8458	4.97755	0.886938	5.61206	1.99928e-08	2.57407e-07	16.9035	43.7141	112.175	137.942	10.818	119.824	0	90.3575	102.739	59.7885	53.9438	20.4187	0	75.3102	56.6454	40.9521
Itgav	1199.27	1.9015	0.338945	5.61005	2.02266e-08	2.60205e-07	751.851	900.332	1227.62	1381.91	500.343	1061.13	318.594	3081.17	1594.62	2432.49	763.016	1104.01	649.767	948.245	1258.14	1215.14
Cd200r1	66.1807	4.22359	0.753343	5.60646	2.0651e-08	2.65448e-07	31.5063	73.8602	122.458	88.1092	4.81587	107.204	3.47567	71.6136	103.571	107.786	26.4878	119.471	7.40166	69.6187	59.396	62.1151
2810459M11Rik	57.8543	3.11639	0.555908	5.60595	2.07119e-08	2.66013e-07	64.2407	78.0163	58.9569	65.6891	5.24833	52.9972	7.45699	123.256	79.5957	99.9682	46.5396	63.2426	15.8801	42.1972	53.511	68.8734
Atp5h	1704.66	-0.70061	0.125015	-5.6042	2.09217e-08	2.68489e-07	1508.21	1323.14	1474.65	1445.84	2831.32	1542.53	2377.28	1842.86	1525.31	1352.26	1436.39	1729.92	2463.43	1505.33	1512.87	1403.17
Rtn4	1726.79	1.3768	0.24577	5.60198	2.11921e-08	2.71738e-07	1125.33	1525.68	1872.1	2292.74	901.045	1735.41	810.624	2498.67	2216.82	3333.7	1264.49	2239.17	853.229	1581.35	1863.81	1514.52
Rfng	295.88	-1.58986	0.283878	-5.60049	2.1375e-08	2.73861e-07	271.28	258.017	214.76	172.78	499	301.654	759.888	230.276	199.226	102.076	339.22	155.02	586.13	229.981	202.252	212.515
Sspn	239.373	1.69428	0.302632	5.59848	2.16244e-08	2.76831e-07	162.239	255.015	281.338	362.488	124.202	169.006	107.633	340.406	407.036	410.612	147.169	248.885	90.6213	235.271	291.676	196.366
Pradc1	127.647	-1.43291	0.256154	-5.59394	2.21977e-08	2.8394e-07	97.8242	77.6627	100.704	96.3988	250.949	109.097	231.414	79.0393	103.776	61.9431	119.569	90.384	285.373	116.364	101.228	120.627
Plekhb1	533.767	-1.26564	0.226296	-5.59286	2.23355e-08	2.85471e-07	666.247	440.639	465.478	392.229	864.727	500.869	931.613	282.55	340.342	295.674	537.079	517.809	869.291	450.204	479.373	506.154
Clic5	99.3768	-1.78743	0.319671	-5.59147	2.25154e-08	2.87537e-07	107.888	70.7623	67.402	55.2457	332.033	53.2197	139.782	52.9687	93.1223	74.3808	88.7375	40.1104	223.255	65.1119	66.7266	59.2822
Sypl	2156.25	-1.18699	0.212377	-5.58909	2.2826e-08	2.91267e-07	2675.84	1851.9	1740	1584.76	3295.81	1840.02	3906.14	991.573	1655.95	1547.22	2143.8	2058.82	2990.91	1923.04	2130.07	2164.1
Hsbp1l1	199.902	-2.66573	0.477015	-5.58834	2.29244e-08	2.92286e-07	177.96	249.353	98.3705	56.8948	334.668	173.457	481.748	25.4034	86.9141	47.8534	192.856	159.606	451.826	167.431	277.616	216.47
2020-09-08	1135.89	1.02679	0.18375	5.58799	2.29709e-08	2.92642e-07	794.36	1319.67	1229.24	1505.53	681.874	1200.59	677.648	1411.66	1460.83	1565.05	1113.87	1119.45	704.784	1093	1166.69	1129.96
Vegfa	1038.05	-1.15662	0.207106	-5.5847	2.341e-08	2.97996e-07	1116.94	1200.49	798.422	647.789	1774.24	1104.99	1330.33	626.492	816.765	563.352	1353.02	814.708	1724.5	933.237	805.997	997.475
Ace2	73.9616	-1.78605	0.319842	-5.58414	2.34857e-08	2.98718e-07	50.065	45.6612	59.2444	53.6327	209.492	28.4907	108.116	52.734	43.4648	38.5312	42.7543	46.8038	225.696	39.4992	75.9081	63.292
Uqcrfs1	1035.71	-1.14862	0.205721	-5.5834	2.3586e-08	2.99751e-07	1536.02	754.798	847.99	820.44	1841.99	1001.32	1664.9	704.808	756.618	652.782	1003.33	838.14	1695.68	872.293	781.773	798.514
1700025G04Rik	632.989	2.03578	0.36463	5.58314	2.36212e-08	2.99957e-07	971.596	540.268	583.227	825.746	278.918	565.159	76.5633	669.615	946.923	1146.86	584.349	813.372	201.496	534.337	730.476	658.911
Edem1	6039.2	-1.70865	0.306182	-5.5805	2.39822e-08	3.04296e-07	4859.41	4309.76	4554.19	4139.3	10928.1	5529.92	11384.7	1569.06	3626.34	3215.02	5943.64	5876.17	11728.9	6380.97	6049.06	6532.72
Nipsnap1	180.213	1.53734	0.275509	5.57999	2.40528e-08	3.04946e-07	191.861	228.455	236.166	155.562	69.4457	157.883	75.2138	281.577	268.418	225.928	148.819	182.798	99.5483	199.312	182.432	179.991
Rps6kb1	1224.87	-1.42981	0.256256	-5.57963	2.41036e-08	3.05344e-07	1490.85	856.835	1054.14	891.825	2506.05	1127.24	2250.84	469.237	911.251	813.621	1167.65	954.099	1958.04	1022.26	1042.02	1081.93
Dkk2	162.493	3.52214	0.631528	5.57718	2.44449e-08	3.09171e-07	48.9389	126.361	165.772	368.579	28.987	52.2342	24.961	271.87	426.81	715.2	39.0445	35.9322	26.578	44.4415	133.453	90.7198
Plscr3	521.362	1.52126	0.272761	5.57724	2.44368e-08	3.09171e-07	365.922	677.069	552.9	626.865	263.812	551.826	179.085	1057.56	683.232	575.197	498.629	468.511	322.443	501.534	512.053	505.155
Reg1	249291	-2.40848	0.431949	-5.57585	2.46325e-08	3.11294e-07	100310	156820	171897	139584	587748	234957	696702	42235.5	133678	56685.4	241174	184805	656283	202257	205932	177583
Plcg2	488.126	1.7057	0.305947	5.57514	2.47327e-08	3.1231e-07	206.878	528.19	664.911	632.439	129.124	703.683	242.122	628.058	512.172	614.291	571.469	539.819	188.704	614.946	523.928	509.288
H2-T22	603.311	-0.833254	0.149473	-5.57462	2.48071e-08	3.12999e-07	520.072	547.823	472.327	466.049	834.359	594.326	795.75	505.999	410.034	572.7	708.757	646.726	849.582	698.587	554.658	475.23
Angpt4	105.335	5.24851	0.941722	5.57331	2.49944e-08	3.15109e-07	2.2245	173.536	142.091	211.088	0	46.3209	7.48831	283.221	149.772	276.197	82.2301	39.2748	7.97341	60.9778	99.6781	103.295
Pabpc4	4340.93	-1.71831	0.308345	-5.57269	2.50842e-08	3.15989e-07	7856.7	3399.4	3302.41	2497.46	9931.13	3856.21	5786.7	1694.32	2413.32	1657.48	4893.94	3405.68	8729.89	3978.85	2885.58	3165.75
Fbxo9	569.625	-1.05782	0.189873	-5.57119	2.53002e-08	3.18455e-07	413.69	544.237	412.127	471.44	1079.32	502.106	995.682	454.792	511.775	409.202	603.871	522.283	815.347	489.983	342.486	545.652
Lgals4	405.613	3.22426	0.578849	5.57012	2.54569e-08	3.20172e-07	792.38	479.267	649.592	610.303	97.5256	56.275	30.3916	1525.69	334.395	919.296	186.741	48.5635	119.419	66.2786	271.514	302.179
Crtap	559.595	1.74589	0.313488	5.56924	2.55846e-08	3.21521e-07	210.64	578.811	738.337	781.392	294.987	408.96	250.513	1132.89	715.92	918.565	387.061	608.026	210.315	520.625	591.455	605.02
Epha2	229.605	2.05297	0.368754	5.56731	2.58698e-08	3.24847e-07	301.935	287.955	213.433	243.15	100.338	314.868	59.5366	507.766	299.229	266.722	228.277	218.093	70.5167	237.176	136.414	188.275
Fbln1	758.789	1.75958	0.316445	5.56048	2.6904e-08	3.37564e-07	371.648	1210.14	867.37	884.533	354.278	772.783	248.294	1214.19	1006.27	955.846	927.522	640.658	276.86	928.524	770.322	711.402
Rhbdd1	666.659	-1.15026	0.206892	-5.55972	2.70204e-08	3.38755e-07	442.696	631.888	557.61	571.374	1001.25	636.03	1182.13	342.11	542.862	465.312	660.881	611.195	1164.27	655.259	621.673	580.008
Btc	158.806	2.12569	0.382534	5.55687	2.74658e-08	3.43792e-07	191.307	180.275	173.059	225.93	47.4333	151.775	52.4181	233.495	180.812	379.706	131.331	139.551	39.867	134.358	156.519	123.056
Pdgfrb	842.624	1.57576	0.283564	5.55699	2.74464e-08	3.43792e-07	897.659	1259.11	972.856	1215.51	463.831	749.081	289.538	1515.57	1188.06	965.609	519.453	536.402	478.444	740.064	762.065	928.737
Gm1966	231	3.54527	0.638055	5.55638	2.75435e-08	3.44359e-07	40.041	363.078	169.416	157.491	36.8926	242.445	14.9766	253.493	514.5	483.215	205.871	294.979	18.6046	484.722	184.528	231.74
Zmynd8	735.31	0.82901	0.149202	5.5563	2.75548e-08	3.44359e-07	614.191	796.264	680.198	772.324	402.613	713.818	404.509	754.899	808.686	897.686	687.543	722.973	466.296	827.282	1104.12	1111.57
Ly6a	1999.61	2.06392	0.371624	5.55378	2.79557e-08	3.49092e-07	767.494	2163.94	2100.57	2030.68	876.88	1998.16	491.134	3980.67	2645.25	3733.81	2026.9	2681.77	561.33	2261.6	1992.49	1681.03
Prom2	358.286	-5.10829	0.919856	-5.55336	2.80226e-08	3.4965e-07	866.737	21.0099	46.2444	61.067	1780.21	222.714	1264.79	14.443	35.2522	5.09636	200.385	55.8239	1003.76	95.7407	30.5048	28.8022
Eepd1	208.153	1.59516	0.287299	5.55228	2.81972e-08	3.5155e-07	247.482	247.96	223.57	221.316	68.363	219.291	72.2267	362.41	274.877	242.889	152.881	226.275	129.272	225.84	189.051	226.745
Slc39a4	104.953	3.34138	0.601851	5.55184	2.82676e-08	3.5215e-07	125.684	120.464	96.5488	118.737	10.5407	101.512	0	305.921	116.403	155.003	70.3984	120.331	37.2092	124.023	104.621	71.8572
Klk1	74553	-2.43458	0.438585	-5.551	2.84042e-08	3.53571e-07	126549	41150.8	48695.2	40647.6	204003	56836.7	174225	15071.8	32322	11808.9	66526.5	53881.6	176175	55813.3	42650.7	46489.8
Ctgf	988.497	2.70336	0.487078	5.55015	2.85419e-08	3.55005e-07	1074.33	803.563	1282.38	1409.47	404.392	321.425	97.0025	1878.47	2071.16	3072.37	730.353	524.497	263.912	491.329	706.98	684.325
Aldh1a2	784.199	2.59876	0.468261	5.54981	2.85988e-08	3.55433e-07	85.6431	761.537	1302.5	1330.02	223.991	1308.81	152.262	966.95	834.22	958.627	726.464	1269.33	172.757	969.444	786.715	697.913
Ifngr1	1052.09	1.35095	0.243529	5.54741	2.89929e-08	3.60047e-07	1371.59	955.784	1145.46	1315.19	666.582	940.615	404.165	1530.12	1283.41	1693.65	830.206	1035.08	479.113	1072.43	1164.52	945.563
Brwd1	666.404	-1.03214	0.186076	-5.54688	2.90805e-08	3.60283e-07	396.096	522.049	574.285	496.208	1102.02	563.16	1154.34	460.194	569.886	632.793	717.19	629.431	962.18	576.8	646.488	659.344
Pamr1	630.531	1.22794	0.221375	5.5469	2.90783e-08	3.60283e-07	734.477	722.847	615.955	780.16	381.327	495.804	256.765	699.38	814.663	1217.21	495.791	448.371	295.828	519.274	829.414	781.23
Sgpl1	1368.82	1.02648	0.185051	5.54704	2.90549e-08	3.60283e-07	1433.1	1383.27	1630.72	1715.07	767.292	1434.61	733.991	1571.26	1496.16	2005.61	1075.61	1761.44	861.644	1372.16	1412.96	1246.19
Atp5b	9825.87	-0.976815	0.176127	-5.54608	2.92142e-08	3.61655e-07	9316.38	7305.11	7878.41	7984.62	18838.3	8649.17	15438	10262.9	8354.61	5524.53	8710.53	7315.82	16624.7	8965.01	7201.67	8844.06
Hvcn1	88.8732	3.03053	0.546586	5.54447	2.94843e-08	3.64712e-07	39.5296	152.367	111.505	128.622	18.2112	84.6505	0	165.646	130.719	125.813	84.6872	107.248	31.4873	86.7308	72.2853	82.4699
Tifab	59.5852	3.60276	0.649815	5.54429	2.95145e-08	3.64799e-07	15.5715	25.2722	89.2621	86.579	26.3518	73.9163	0	130.8	115.627	106.11	33.7202	92.7553	0	51.6761	62.6077	43.1143
Myo1g	205.448	3.03538	0.547977	5.53926	3.03757e-08	3.75149e-07	48.5455	196.718	288.165	349.572	25.9324	397.307	8.98766	228.934	258.83	228.554	234.771	224.011	84.5454	373.932	186.11	152.259
S100a10	921.37	1.80626	0.326092	5.5391	3.04028e-08	3.7519e-07	640.571	752.961	996.829	1125.6	617.063	791.565	241.252	2343.26	1305.13	1191.16	636.337	1064.23	380.469	975.637	935.862	743.997
Amy2a2	2.20513e+06	-2.74162	0.495328	-5.53495	3.11308e-08	3.82975e-07	1.85348e+06	1.28979e+06	1.37037e+06	1.14841e+06	6.23927e+06	1.93054e+06	6.16552e+06	197691	843447	361144	2.11599e+06	1.44842e+06	5.45237e+06	1.62555e+06	1.65181e+06	1.58827e+06
Amy2a3	2.20513e+06	-2.74162	0.495328	-5.53495	3.11308e-08	3.82975e-07	1.85348e+06	1.28979e+06	1.37037e+06	1.14841e+06	6.23927e+06	1.93054e+06	6.16552e+06	197691	843447	361144	2.11599e+06	1.44842e+06	5.45237e+06	1.62555e+06	1.65181e+06	1.58827e+06
Amy2a4	2.20513e+06	-2.74162	0.495328	-5.53495	3.11308e-08	3.82975e-07	1.85348e+06	1.28979e+06	1.37037e+06	1.14841e+06	6.23927e+06	1.93054e+06	6.16552e+06	197691	843447	361144	2.11599e+06	1.44842e+06	5.45237e+06	1.62555e+06	1.65181e+06	1.58827e+06
Gm6086	64.0175	4.08691	0.738366	5.53507	3.11101e-08	3.82975e-07	22.245	40.4356	129.339	121.211	5.27037	21.6821	9.98441	117.288	100.882	187.252	26.0297	96.0978	5.3156	49.6091	39.5417	52.0965
Mthfd2	1516.22	-2.3393	0.42291	-5.53145	3.17603e-08	3.90414e-07	996.37	746.809	1206.88	1185.38	4886.37	943.263	3426.46	316.067	564.405	335.26	1862.17	1044.43	4103.54	1052.16	773.932	815.993
Blnk	152.232	1.47284	0.266458	5.52749	3.24849e-08	3.9901e-07	96.8957	149.302	194.75	218.169	98.8052	230.464	65.0027	214.613	162.589	166.125	129.596	195.415	47.1911	208.042	131.934	126.813
Apip	239.608	-1.71513	0.310316	-5.52705	3.25667e-08	3.99703e-07	106.136	111.586	193.213	195.977	801.482	162.604	424.181	217.197	128.034	98.0774	97.536	157.565	587.194	127.889	165.72	259.341
Ddx26b	750.475	-1.49135	0.269931	-5.52491	3.29656e-08	4.04008e-07	1091.79	487.712	475.307	440.259	1480.1	653.823	1464.26	434.984	647.957	492.579	513.083	632.23	1268.24	550.27	640.757	734.256
Loxl4	70.7325	2.65106	0.47984	5.52489	3.29687e-08	4.04008e-07	57.8391	83.3744	81.7434	76.767	25.5041	97.9667	9.19255	108.154	103.16	80.7095	101.346	66.2606	15.6045	85.819	67.4609	70.8168
Fem1a	775.257	-1.35312	0.244937	-5.52437	3.3067e-08	4.04898e-07	915.381	649.497	602.975	572.246	1383.47	774.643	1467.71	386.456	520.709	377.105	1032.9	598.314	1134.88	661.455	599.716	726.656
Polr3k	868.795	-1.44062	0.260823	-5.52336	3.32569e-08	4.0659e-07	388.175	684.035	663.09	655.527	1430.9	829.833	1904.53	404.832	611.503	653.822	890.333	800.537	1413.95	784.444	889.688	895.521
Reps1	652.738	-0.77768	0.140796	-5.52344	3.32423e-08	4.0659e-07	778.072	666.882	540.085	510.863	957.074	647.081	893.556	473.649	590.974	500.817	634.784	617.604	867.263	568.754	648.25	548.098
Trpv2	89.5113	2.38484	0.431798	5.52304	3.33179e-08	4.07021e-07	41.4314	100.875	107.597	133.087	23.883	112.701	26.5801	151.013	122.936	109.156	118.732	111.766	23.4886	109.062	77.1257	62.7459
Cttn	1741.21	1.02031	0.184768	5.52212	3.34941e-08	4.08856e-07	1836.02	1903.07	1965.78	1955.92	944.857	1660.72	976.574	2798.94	1879.68	2283.83	1659.85	1645.54	1263.67	1725.77	1593.21	1765.94
Epsti1	162.141	2.86824	0.519496	5.52119	3.36709e-08	4.10696e-07	24.7537	167.276	183.286	181.182	25.8569	205.446	26.8153	195.837	205.385	320.481	173.327	318.752	25.9568	196.826	175.01	168.067
Poldip2	822.371	-0.756892	0.137107	-5.52045	3.38128e-08	4.12108e-07	975.245	782.59	739.565	688.67	1242.22	825.252	1194.55	647.149	731.783	558.668	772.825	712.058	1118.62	772.13	682.836	713.776
Xdh	782.69	2.20732	0.39986	5.52024	3.38543e-08	4.12296e-07	1559.37	781.755	1041.09	1316	413.724	675.102	99.8441	810.205	1105.05	982.554	851.88	938.416	180.731	766.874	548.641	451.802
Myof	654.534	2.26219	0.40988	5.51915	3.4064e-08	4.14209e-07	621.915	734.778	627.736	1012.84	184.512	740.348	74.9033	665.206	965.179	1654.51	453.676	790.722	252.559	512.765	571.75	609.154
Prpf4b	655.73	-0.920252	0.166735	-5.51926	3.40424e-08	4.14209e-07	566.135	465.852	516.445	516.176	980.288	531.212	933.542	422.669	585.894	786.459	603.415	651.794	980.729	455.784	688.685	806.597
Kbtbd11	166.256	2.65271	0.480714	5.51827	3.42355e-08	4.15973e-07	185.963	423.297	123.335	210.076	18.8606	136.104	24.4584	179.577	259.534	212.672	121.21	167.516	48.7181	173.413	276.151	99.2157
Cdhr2	87.4586	-2.10034	0.380769	-5.51604	3.46719e-08	4.20951e-07	146.817	141.525	56.4719	37.9299	202.909	20.6966	267.083	61.6167	30.2647	39.0109	106.485	12.5345	130.232	37.2068	41.1893	67.3662
Ly6d	45.4866	7.34266	1.33136	5.51518	3.48428e-08	4.22375e-07	109	93.5073	35.5227	47.8246	0	17.7399	0	191.877	33.3688	50.9742	79.8637	7.5207	0	14.4693	16.4757	29.6411
Mrpl37	431.419	-0.85479	0.154988	-5.51521	3.48369e-08	4.22375e-07	417.304	337.836	402.738	340.983	738.572	349.103	608.042	423.768	358.803	310.939	393.478	399	727.039	383.759	314.329	397.017
Dph3	431.409	-0.983285	0.178305	-5.51464	3.49495e-08	4.23343e-07	443.525	310.552	346.882	344.792	757.802	475.379	555.63	317.307	312.752	298.986	492.58	450.635	649.109	439.244	355.047	352.315
Bace2	207.391	2.15072	0.390028	5.51428	3.50207e-08	4.23555e-07	236.909	248.51	284.181	319.106	100.137	149.804	44.9298	531.849	176.156	350.058	153.812	130.359	77.0763	102.319	190.294	222.757
Luc7l2	2414.59	-0.894261	0.162168	-5.5144	3.49965e-08	4.23555e-07	2488.61	2125.53	1869.53	1949.13	3527.05	2335.33	3844	1421.04	2009.04	2521.75	2143.97	2423.82	2729.24	1939.2	2717.58	2588.59
C1galt1c1	509.49	-1.13032	0.205035	-5.51281	3.53156e-08	4.26793e-07	575.033	354.654	439.024	408.983	809.001	486.862	913.573	270.789	399.65	391.149	483.323	533.134	765.447	440.281	469.558	411.383
Galnt10	404.773	1.70304	0.309047	5.51061	3.57599e-08	4.31831e-07	195.533	505.13	466.264	500.211	182.518	447.704	143.332	769.333	474.536	494.521	464.19	349.116	183.855	473.951	373.378	452.798
Arpc2	2493.63	1.00596	0.182557	5.51039	3.58042e-08	4.32035e-07	2156.47	2118.2	2859.74	3254.53	1786.88	2525.41	1602.83	3912.53	2854.88	3528.75	1999.23	2822.14	1421.81	2492.64	2342.81	2219.19
Gjb4	38.8441	7.16882	1.30156	5.50789	3.63167e-08	4.37884e-07	51.1634	31.1687	39.1668	46.9994	0	62.0894	0	136.204	51.2183	62.939	22.4799	40.1102	0	35.1393	23.0662	19.7607
Malsu1	160.461	-1.03994	0.188916	-5.50477	3.69642e-08	4.45351e-07	170.768	143.22	112.15	138.685	279.873	154.58	251.449	155.1	105.535	106.813	165.196	140.671	258.832	147.365	111.22	125.922
Pfn2	142.381	1.8302	0.332704	5.501	3.77652e-08	4.54654e-07	71.3101	145.312	150.366	182.574	57.6545	119.575	47.1646	209.202	210.751	298.226	103.545	132.965	54.3437	157.62	169.558	167.934
Dio3	84.948	4.12343	0.749648	5.50049	3.78733e-08	4.55607e-07	35.8292	110.907	88.0232	84.305	2.51965	145.12	20.9759	285.402	61.5856	99.9653	82.0273	95.8795	0	105.67	74.8284	66.1302
Lpcat1	240.423	1.32271	0.240504	5.49974	3.80343e-08	4.57195e-07	201.025	237.91	355.312	283.607	128.944	280.956	106.15	340.543	293.048	330.045	172.21	240.677	145.823	302.541	184.464	243.512
Lyn	772.36	1.40412	0.255387	5.49803	3.84065e-08	4.61317e-07	372.804	749.258	968.874	1221.87	464.715	845.538	370.224	967.148	932.304	1165.13	695.556	943.941	324.504	863.326	778.085	694.481
4930453N24Rik	598.246	-1.17034	0.212902	-5.49706	3.86169e-08	4.63491e-07	573.776	451.22	445.692	468.499	1384.18	443.362	828.326	399.543	490.472	492.146	616.209	663.22	833.357	488.853	476.608	516.459
Metap1d	328.09	-1.09421	0.199078	-5.49637	3.87679e-08	4.64595e-07	413.765	293.94	269.356	229.438	495.251	294.178	500.652	246.07	245.514	245.493	277.213	233.897	590.277	223.818	341.524	349.05
Nrd1	2539.23	-0.98005	0.178307	-5.49642	3.87589e-08	4.64595e-07	1830.53	1664.82	2519.25	2139.56	4290.1	2163.34	4368.31	1494.63	2170.71	2532.42	2232.92	2633.56	3650.05	2193.13	2392.83	2351.51
Sycn	25833.8	-3.56018	0.648093	-5.49331	3.94461e-08	4.72364e-07	23789.9	10926	9936.33	9189.75	85358.8	28280.4	56691.5	3549.99	4549.02	1130.28	26351.5	12796.1	98798.5	20983.6	7686.74	13322.3
Elac1	287.767	-1.2374	0.225306	-5.49207	3.97253e-08	4.75346e-07	448.236	284.734	213.136	205.316	440.075	241.46	461.779	153.501	229.702	209.098	239	260.718	512.956	220.14	245.488	238.925
Atp1a3	132.444	3.08873	0.562505	5.49103	3.99598e-08	4.77789e-07	58.133	107.625	206.758	124.285	14.5287	245.535	0	196.708	155.5	122.374	157.644	213.464	69.4514	209.108	127.953	110.039
Casp12	248.917	1.63718	0.298206	5.49011	4.01679e-08	4.79914e-07	174.965	244.532	242.772	324.289	128.294	240.903	74.3079	294.174	338.015	574.437	166.931	257.127	88.579	232.621	334.543	266.182
Far1	792.18	1.56366	0.284863	5.48915	4.03863e-08	4.82157e-07	632.89	692.736	1066.18	1323.66	283.581	871.569	421.749	578.333	1008.58	1418.17	670.483	909.084	301.774	877.127	947.881	671.079
Nupr1	10977.4	-2.16362	0.394193	-5.48872	4.04863e-08	4.8262e-07	12086.6	15531.6	7161.52	3654.6	17369.8	15616.4	15476.2	3559.84	4062.7	2157.43	10596.4	11427.5	29109.8	10773.9	8977.43	8077.17
Rftn1	185.832	2.05453	0.37431	5.48885	4.04564e-08	4.8262e-07	85.4896	258.514	219.609	222.016	74.3944	246.577	33.1608	354.07	240.282	228.129	176.682	171.589	81.4821	206.637	193.647	181.039
Srp68	2016.41	-1.49432	0.272342	-5.48694	4.08945e-08	4.87117e-07	1717.21	1854.66	1694.09	1477.49	4056.3	1876.31	3729.96	1019.54	1250.22	754.978	2565.42	1336.94	3708.05	1999.49	1438.62	1783.36
Yrdc	494.694	-1.68016	0.306316	-5.48507	4.13309e-08	4.91944e-07	619.578	272.502	365.825	318.782	1080.69	429.183	904.436	186.62	320.529	234.51	622.536	396.612	873.941	463.193	401.599	424.563
P2ry14	303.219	-2.08025	0.379361	-5.48356	4.16858e-08	4.95794e-07	380.054	199.089	157.858	157.521	885.7	128.567	477.59	77.4553	275.863	166.464	303.005	207.746	755.138	207.061	287.535	184.859
Aox3	97.2969	6.23432	1.13694	5.48341	4.17206e-08	4.95834e-07	39.4161	149.99	69.1839	79.8801	0	78.2814	5.27726	160.341	222.105	175.547	49.5729	134.255	0	98.0822	181.042	113.777
Hs3st3b1	259.618	-2.04643	0.373314	-5.48179	4.21049e-08	5.00023e-07	437.114	106.986	156.664	192.123	809.001	194.153	504.213	106.478	128.043	112.351	249.057	168.798	491.693	199.47	124.392	173.356
Prss2	452317	-2.20023	0.401396	-5.48144	4.21871e-08	5.00623e-07	231039	381225	321004	261392	1.00775e+06	449778	1.14577e+06	111686	227134	107365	525844	304240	1.02159e+06	388740	337872	414643
Tcaim	116.318	-1.23675	0.225688	-5.47991	4.25534e-08	5.0459e-07	129.455	100.264	95.5063	92.2491	162.306	108.298	202.102	61.899	85.1373	94.0853	98.1925	98.951	223.518	106.165	113.965	89.0004
Tfpi	280.692	2.10236	0.383709	5.47905	4.27624e-08	5.06686e-07	109.493	260.629	323.433	435.246	118.416	162.469	94.9218	480.181	365.011	646.016	213.332	295.797	68.1825	319.096	258.352	340.493
Pxdc1	86.1362	2.39922	0.438057	5.47696	4.32703e-08	5.12319e-07	122.114	61.9769	84.0694	156.702	25.5708	74.0426	7.45268	90.4693	111.27	182.174	83.7312	70.9367	30.0827	79.8964	85.4172	112.272
Mmp3	80.163	3.05254	0.557391	5.47647	4.33883e-08	5.1333e-07	43.3777	96.0345	149.377	143.474	13.1759	54.2053	7.48831	137.827	59.7534	135.238	99.386	111.975	23.9202	43.408	84.0261	79.9412
Ap3s1	322.75	-1.8151	0.331468	-5.47595	4.3518e-08	5.14478e-07	107.888	188.699	165.772	211.913	735.216	241.46	863.651	176.202	220.389	390.629	361.457	239.827	443.853	243.911	297.387	275.752
Psg16	487.222	-1.01395	0.185194	-5.47509	4.373e-08	5.16598e-07	591.066	370.638	384.315	401.596	819.077	435.879	807.919	326.214	413.196	463.424	393.852	448.378	680.406	349.841	470.591	439.166
Plekhd1	62.4499	6.38387	1.16614	5.47435	4.3911e-08	5.18052e-07	84.7181	84.3996	50.8873	101.147	1.68437	33.7012	1.59547	181.181	79.4843	198.575	60.5934	14.1416	0	19.2472	46.0238	41.8184
Qpct	108.756	2.06293	0.376838	5.47432	4.39188e-08	5.18052e-07	98.9901	171.009	127.517	156.667	26.3518	123.194	32.4493	86.4796	107.091	95.1866	110.626	130.359	26.578	183.967	144.162	119.463
Cnr2	53.9096	3.03067	0.55364	5.47408	4.3978e-08	5.18362e-07	35.011	44.4361	63.614	78.7204	13.3653	63.9773	7.59595	73.4644	70.8471	101.831	50.4072	59.1836	5.39202	92.2574	45.9595	56.4899
Muc5ac	127.365	7.35982	1.34493	5.47226	4.44338e-08	5.23342e-07	528.521	490.7	41.9008	162.804	0	148.263	0	74.9623	33.8842	8.40694	387.611	30.1289	0	49.8576	23.8439	56.9535
Pde4a	340.554	-1.61839	0.295769	-5.4718	4.45483e-08	5.24299e-07	254.086	346.135	202.715	166.894	482.275	364.781	738.614	189.809	251.114	158.849	470.298	222.773	644.723	330.045	320.395	305.356
P2ry6	163.475	2.55202	0.466703	5.46818	4.54669e-08	5.34711e-07	38.9287	180.275	192.187	209.439	52.7037	196.125	24.961	385.915	211.077	246.029	165.052	179.661	50.4982	174.665	139.22	168.864
Cdon	1017.41	1.61826	0.296159	5.46415	4.65122e-08	5.46596e-07	608.768	1439.97	987.426	1044.64	341.56	976.831	427.312	1007.02	1735.5	1768.27	646.191	907.661	396.948	1049.74	1381.41	1559.26
Tgfb3	532.702	1.87788	0.343835	5.46156	4.71972e-08	5.54233e-07	318.103	779.227	621.191	658.825	258.248	430.685	182.215	1277.2	744.202	838.994	363.232	298.321	233.887	415.476	532.166	571.265
Gm28043	442.617	-1.30908	0.239702	-5.4613	4.72667e-08	5.54635e-07	395.961	364.763	315.15	352.913	637.714	407.032	823.714	169.176	326.704	331.332	369.739	489.681	696.344	433.046	493.448	475.156
Slc25a15	371.081	-1.0486	0.192047	-5.46013	4.75791e-08	5.57886e-07	273.613	303.267	302.398	318.281	642.985	291.723	634.01	230.252	311.96	315.728	434.222	327.568	523.587	346.23	350.933	330.543
Eif2d	532.694	-0.76142	0.139467	-5.45948	4.77527e-08	5.59089e-07	531.504	523.986	467.02	399.458	735.848	567.689	818.256	488.399	454.249	338.334	573.66	515.992	747.712	487.307	441.314	432.374
Ptpn9	800.267	0.783067	0.14343	5.45958	4.7725e-08	5.59089e-07	667.349	731.21	916.303	934.229	577.105	802.238	479.252	861.553	936.655	1203.1	674.996	878.251	534.218	828.885	909.459	869.473
Ndufb2	330.426	-1.10909	0.203242	-5.45698	4.84291e-08	5.66588e-07	197.086	211.71	255.871	262.933	739.811	288.654	571.769	349.93	281.665	210.047	290.651	295.591	552.558	241.596	289.59	247.358
Cd33	55.9629	3.88955	0.712794	5.45676	4.84898e-08	5.66877e-07	67.0832	64.8452	77.5114	81.385	0	86.268	12.34	46.738	49.8082	87.3277	56.3708	67.8247	0	80.6053	61.349	55.9504
Mras	128.591	1.76854	0.324155	5.45586	4.87368e-08	5.69342e-07	98.8447	196.3	209.918	169.443	58.5834	125.266	38.8636	161.758	124.565	130.105	106.522	143.117	47.269	184.537	148.787	113.583
Rars2	298.252	-0.807475	0.148021	-5.45515	4.89316e-08	5.70772e-07	235.146	237.029	280.07	250.907	426.371	239.897	472.39	220.517	245.499	290.645	245.168	297.655	406.076	259.258	326.276	339.123
Wasf2	1720.84	0.732676	0.134308	5.4552	4.89176e-08	5.70772e-07	1992.84	1892.21	1936.97	2087.98	1253.75	1910.78	1096.22	1585.33	1939.37	1976.2	1687.4	1774.97	1055.67	1987.15	1688.31	1668.29
Itih4	3205.06	-2.84961	0.5224	-5.45484	4.90166e-08	5.71341e-07	2182.8	2499.29	2154.43	1379.6	7400.87	2743.55	13010.8	258.103	923.417	634.216	3800.54	2122.17	5072.88	2699.5	2193.82	2205.01
Adora2b	46.3021	3.38519	0.620937	5.45174	4.98791e-08	5.80964e-07	26.694	46.3324	63.7586	70.0878	7.90555	45.3353	2.4961	71.8861	47.3371	56.1757	58.5667	67.6863	7.97341	58.9108	58.4888	51.1983
Parp16	269.331	-1.92818	0.353734	-5.45092	5.01088e-08	5.83209e-07	177.96	74.9743	169.416	232.527	780.014	134.035	673.948	98.911	221.941	128.996	129.557	259.046	605.979	165.364	215.008	241.62
Nck2	254.671	1.7859	0.32796	5.44548	5.16661e-08	6.0089e-07	242.882	287.575	190.644	405.303	92.9139	286.496	72.9826	333.911	274.695	466.12	194.475	338.374	96.613	214.008	359.256	218.491
Atp10b	75.1587	6.40846	1.17694	5.445	5.18039e-08	6.02049e-07	33.7653	95.8541	108.809	84.4564	0	26.541	0	216.008	117.319	288.426	56.1098	11.7082	4.13767	21.3852	86.6653	51.3539
Ndufs5	324.764	-1.13125	0.207792	-5.44417	5.2047e-08	6.04428e-07	233.053	291.596	261.163	238.007	553.487	317.188	551.253	335.409	246.774	188.548	326.634	260.063	675.587	232.202	208.369	276.892
Tusc2	390.68	-0.971207	0.178436	-5.44288	5.24269e-08	6.08392e-07	380.104	287.357	341.433	310.008	709.82	322.398	645.014	342.098	301.524	277.435	433.452	413.772	551.084	318.327	328.263	288.786
Renbp	130.228	2.222	0.408257	5.44265	5.24927e-08	6.08706e-07	110.805	135.715	120.015	145.325	35.6712	154.231	22.4559	274.06	189.794	142.881	118.318	106.803	67.0166	229.927	103.016	127.611
Bnc2	62.6099	2.76306	0.50775	5.44176	5.27565e-08	6.11316e-07	64.162	87.3008	99.7832	68.3709	12.3363	33.5137	8.9687	62.2564	131.69	105.441	55.3069	60.0019	15.6436	34.1196	97.1302	65.7323
Pnliprp2	81041.3	-2.69546	0.49536	-5.44141	5.28593e-08	6.12057e-07	105227	54819.7	48581.3	42387.5	195209	73069.7	218728	7826.94	26588	11694.9	95858.4	53870.8	195197	62313.2	49459.3	55830.4
Pabpc1	10428.5	0.467414	0.0859035	5.44115	5.29383e-08	6.12073e-07	9174.34	10461.2	12497.7	11489.1	8271.78	10698.9	9146.68	11323.9	11637.8	11014	9384.93	11471.4	8043.71	10869	10531	10840.9
Tubb6	317.262	1.93069	0.354832	5.44115	5.29381e-08	6.12073e-07	173.511	324.327	352.494	428.772	126.489	349.87	79.8753	784.802	315.84	289.201	391.628	340.938	164.784	403.074	258.669	291.92
Ntrk1	52.3089	3.74989	0.689392	5.43942	5.34542e-08	6.17584e-07	18.9082	68.235	51.9177	84.1054	13.1759	49.2775	4.9922	167.014	68.2897	48.8936	49.693	61.8369	2.6578	68.2125	32.1276	47.6054
Slc16a10	174.013	1.47153	0.270578	5.43847	5.37404e-08	6.20435e-07	151.266	180.275	247.748	219.334	79.0555	148.818	37.4415	225.928	214.957	196.615	162.094	182.168	130.232	194.302	229.836	184.134
Tbc1d14	706.475	0.987236	0.181658	5.43458	5.49257e-08	6.33656e-07	560.833	670.457	756.993	858.428	405.681	709.235	432.565	883.305	847.47	1014.89	638.572	959.244	427.754	759.236	718.935	659.994
H2-Q2	82.0649	-1.55591	0.28634	-5.43378	5.51712e-08	6.36022e-07	135.757	82.6917	64.4573	46.5903	120.803	56.4633	168.904	39.0885	42.9586	49.5692	111.545	56.7237	132.718	70.3688	76.84	57.56
Prdx4	2698.62	-1.80254	0.331796	-5.43268	5.55151e-08	6.39519e-07	1183.63	2208.12	2060.72	1895.33	5990.86	2159.41	5944.11	1040.97	1810.55	1109.26	2826.73	1628.13	5871.76	2012.4	2599.83	2836.11
Afg3l1	793.301	-1.06284	0.195672	-5.43175	5.58032e-08	6.42368e-07	774.92	892.104	474.172	743.373	1385.97	622.776	1038.54	607.355	647.936	467.517	918.021	673.573	1453.09	628.236	655.729	709.504
Fam117a	225.832	-1.53078	0.281867	-5.43084	5.6088e-08	6.45176e-07	238.098	235.821	138.558	148.771	312.13	249.021	430.912	143.981	140.245	108.096	238.667	116.826	496.139	237.55	170.618	207.878
Qsox1	2989.73	-1.21358	0.223535	-5.42904	5.66595e-08	6.51275e-07	3738.52	2835.19	2372.75	1993.9	4082.25	2978.89	5522.64	2233.14	1909.1	1520.6	3246.66	1989.54	5194.87	2817.07	2502.14	2898.38
Grem2	82.3028	2.41761	0.445398	5.42798	5.69954e-08	6.54657e-07	44.4899	68.235	119.32	173.983	26.3518	45.3353	22.4649	118.369	87.6901	175.809	78.089	78.5495	21.2624	78.5477	103.797	74.5519
Ccng2	315.169	1.68498	0.310446	5.42763	5.71087e-08	6.55481e-07	454.505	415.737	387.688	374.4	175.954	297.772	74.2467	415.012	411.414	462.171	201.813	308.612	120.028	331.756	329.522	282.081
Amy2a5	2.65141e+06	-2.971	0.5474	-5.42747	5.7157e-08	6.55558e-07	2.89608e+06	1.50915e+06	1.61776e+06	1.25224e+06	8.21622e+06	2.02547e+06	7.27439e+06	187179	761654	309038	2.48935e+06	1.52644e+06	6.96649e+06	1.75803e+06	1.85848e+06	1.77461e+06
Serp1	11231.7	-1.70757	0.314643	-5.42702	5.73015e-08	6.56738e-07	7042.76	7478.06	8637.47	9176.55	22385.9	9118.31	27284.9	3071.11	7870.38	6139.27	11711	9234.59	20762.7	9629.33	10137.5	10027.7
D930020B18Rik	66.0116	-2.32994	0.429393	-5.42613	5.75882e-08	6.59544e-07	50.5047	47.1323	37.7532	39.4862	195.891	54.829	129.619	10.0585	39.858	21.39	60.826	50.3706	148.383	78.3345	42.3153	49.4341
Col24a1	61.047	8.02755	1.47952	5.42577	5.7704e-08	6.60391e-07	0.796331	21.7128	40.1757	195.68	0	12.4203	0	121.969	141.131	338.079	6.98611	24.5297	0	19.5374	19.4565	34.2785
Cops6	881.496	-0.638817	0.117769	-5.42432	5.81741e-08	6.65287e-07	761.633	772.48	836.879	743.523	1352.04	821.797	1320.15	920.964	799.309	662.195	772.649	777.674	1185.25	798.905	766.129	812.366
Abcd2	84.9922	2.44183	0.450249	5.4233	5.85081e-08	6.68622e-07	51.1634	64.023	166.683	191.298	44.7981	85.7429	9.98441	129.719	137.355	104.029	44.3687	122.838	31.8936	82.6818	60.9601	32.3358
Gpa33	76.0247	5.61806	1.03601	5.42276	5.8686e-08	6.70168e-07	135.932	150.646	100.435	91.8813	2.36806	58.4535	0	182.59	64.6176	110.373	72.2997	73.4646	8.23749	48.5804	43.6765	72.8406
Tmed4	941.777	-0.842731	0.155449	-5.42127	5.91781e-08	6.75299e-07	1124.2	868.925	783.414	741.922	1212.81	874.198	1540.02	772.37	728.835	653.477	996.565	762.233	1317.51	945.218	836.21	910.524
Aim1	453.554	1.69651	0.312961	5.42084	5.9321e-08	6.7644e-07	472.706	460.797	442.667	580.492	237.166	456.31	134.79	574.549	651.08	952.386	338.386	501.38	148.837	474.387	466.263	364.675
Nr3c2	115.318	-2.06536	0.381038	-5.42036	5.94797e-08	6.77759e-07	125.08	67.5219	39.1965	38.0801	132.066	177.635	187.644	40.6317	60.8398	72.3352	102.675	194.248	233.233	112.87	185.784	75.2471
Fstl1	7529.23	2.07742	0.383275	5.42018	5.95383e-08	6.77936e-07	1810.99	8274.52	9429.46	11003.3	3585.67	6534.73	1579.17	12866.5	11632.8	13290.2	5486.88	7434.92	2819.96	8212.46	9288.31	7217.74
Mrpl51	529.602	-1.07689	0.198706	-5.41948	5.97722e-08	6.80108e-07	417.807	434.053	436.299	387.959	1014.04	431.55	860.507	576.846	358.364	346.437	604.283	392.722	911.662	488.083	400.659	412.37
Eif1ax	1146.52	-0.868618	0.16029	-5.41903	5.99223e-08	6.81325e-07	1013.79	881.771	928.403	1042.5	1792.39	971.715	1807.88	796.716	968.956	1075.65	1341.74	1123.65	1512.68	990.652	1035.87	1059.91
Gm13139	137.621	3.54529	0.654329	5.41822	6.01961e-08	6.83944e-07	29.7521	119.663	412.053	156.678	34.0295	112.724	0	138.099	175.37	364.153	74.2116	181.134	22.0639	96.285	166.409	119.305
Myrip	184.441	-2.19223	0.404702	-5.41691	6.06367e-08	6.88454e-07	184.484	114.317	111.002	124.196	471.17	165.507	390.792	40.236	75.9339	59.9844	345.893	130.084	337.895	167.325	117.981	114.258
Atp8b4	86.4995	2.59015	0.478186	5.41661	6.07383e-08	6.89111e-07	54.801	57.6534	82.8506	126.618	19.5117	150.534	9.24096	67.076	122.333	128.257	58.0283	167.707	18.949	147.695	97.3845	75.3542
Wbp5	2934.23	-1.02627	0.189476	-5.41635	6.08267e-08	6.89617e-07	2324.6	2277.03	2497.52	2485.23	4529.88	2513.15	5414.05	1572.85	2504.99	2525.3	2899.35	3060.93	3891.02	2638.58	2993.64	2819.5
Gmds	410.893	-1.07222	0.198033	-5.41436	6.15073e-08	6.96832e-07	356.446	398.861	335.77	316.772	538.687	369.791	812.356	310.275	327.756	251.797	409.201	294.74	682.463	365.667	399.282	404.422
Klk1b3	235.148	-2.46737	0.455881	-5.41231	6.22169e-08	7.04365e-07	424.879	135.628	144.823	105.544	698.323	196.125	479.252	54.0497	115.627	36.9303	223.618	133.701	560.796	175.699	111.211	166.17
Ffar4	60.7874	6.52677	1.206	5.41191	6.23575e-08	7.0545e-07	82.3064	74.9743	100.192	97.2984	2.63518	40.4076	0	71.3456	75.2738	80.1023	49.1014	50.9736	0	46.5085	106.268	95.2108
Atp8b1	1409.46	-1.1391	0.210522	-5.41084	6.27306e-08	7.09162e-07	1697.29	1245.92	1008.3	1034.83	1628.54	1682.33	2316.38	588.602	1000.29	1229.62	1494.93	1320.3	2049.17	1456.23	1424.33	1374.27
Arpc1b	831.144	1.31537	0.243141	5.4099	6.30607e-08	7.12383e-07	642.344	1106.61	1034.97	1065.06	449.143	1075.62	419.227	1446.06	839.551	583.915	1043.46	692.313	454.628	994.69	673.211	777.501
Cox7a2	534.908	-0.7896	0.145973	-5.40921	6.33027e-08	7.14604e-07	533.879	468.379	402.59	474.948	753.662	547.966	793.761	534.011	453.195	385.428	542.482	447.9	874.417	451.649	451.435	442.82
Phgdh	2743.21	-2.20504	0.407791	-5.40728	6.39873e-08	7.21815e-07	1754.85	2550.83	1651.01	1551.5	5193.49	2935.72	7313.69	716.519	1363.08	527.996	3723.18	1871.43	5753.84	2738.48	1881.12	2364.64
Nfatc4	111.774	3.05902	0.566034	5.40431	6.50587e-08	7.33376e-07	84.4944	192.433	116.888	135.691	33.2632	112.466	0	312.503	173.554	149.495	73.6041	59.1864	33.5487	76.2682	119.663	115.326
Dusp8	198.084	-1.64019	0.303506	-5.40415	6.51168e-08	7.33506e-07	216.69	154.463	160.824	118.494	401.563	194.095	305.74	80.7981	89.813	72.7408	281.216	217.603	338.362	280.749	127.122	129.078
C1rl	698.494	-1.95435	0.361772	-5.40216	6.58446e-08	7.41175e-07	413.757	636.86	529.197	341.369	1367.66	791.397	1684.87	212.956	424.482	204.937	774.382	538.984	1326.24	744.136	597.245	587.433
Gps1	947.006	-0.948871	0.175664	-5.40163	6.60397e-08	7.4284e-07	884.853	643.469	806.728	787.822	1423.68	885.772	1371.38	791.658	794.943	632.302	1071.16	873.21	1813.74	814.823	752.358	804.195
Cbx6	1348.44	0.907623	0.16809	5.39963	6.67769e-08	7.50597e-07	1690.03	1586.79	1326.01	1315	801.374	1276.56	845.181	1998.57	1625.87	1304.33	1563.2	1148.29	860.201	1559.62	1326.19	1347.81
Atp8b2	648.095	1.54982	0.287056	5.39901	6.70107e-08	7.52616e-07	606.619	901.592	931.713	1021.38	336.595	567.277	288.819	763.943	558.243	1055.07	435.525	630.385	212.59	635.006	644.04	780.725
Ugt2b34	480.409	-1.86804	0.346005	-5.3989	6.70521e-08	7.52616e-07	530.108	176.897	330.928	415.525	1094.99	274.943	1172.8	344.448	204.006	535.218	255.243	229.827	1277.4	281.121	274.599	288.484
Derl1	1442.81	-0.722265	0.133851	-5.39602	6.81363e-08	7.63698e-07	1280.2	1230.76	1350.77	1330.02	2110.78	1440.87	2343.84	1165.85	1215.25	1145.36	1477.18	1206.65	1804.65	1306.37	1365.01	1311.39
Usp47	1360.63	-0.695504	0.128889	-5.39613	6.8093e-08	7.63698e-07	1136.72	1267.82	1110.31	1172.53	2076.52	1172.8	1849.61	1041	1332.42	1362.78	1416.25	1260.14	1727.57	1074.86	1386.43	1382.35
Asz1	36.3446	7.1476	1.32467	5.39576	6.82341e-08	7.6425e-07	3.00059	15.0406	61.8729	64.3464	0	36.5585	0	98.246	45.9249	143.27	5.34546	29.0756	0	17.8286	27.7444	33.2598
Adamts4	84.5411	4.96076	0.919431	5.39546	6.83485e-08	7.64988e-07	29.1307	144.459	25.8952	110.745	2.5834	112.64	5.75696	220.428	89.5786	129.011	67.2751	67.9946	2.60557	80.0438	147.396	117.115
C2	606.144	1.59647	0.295962	5.39417	6.884e-08	7.69943e-07	342.219	751.818	728.439	886.568	368.672	452.151	238.119	921.747	840.471	879.88	421.183	722.371	225.376	681.755	627.771	609.756
Lhfpl2	317.12	1.92903	0.357797	5.39141	6.99062e-08	7.81314e-07	100.708	395.831	397.237	338.72	80.3713	314.676	107.057	438.906	368.334	515.711	248.09	341.675	116.525	448.561	506.609	354.916
Slc30a1	294.552	-1.09956	0.20398	-5.39052	7.02555e-08	7.84661e-07	271.929	274.609	206.392	234.373	466.175	277.194	372.11	154.705	251.425	237.794	343.358	297.627	520.364	282.408	294.737	227.635
Tnfrsf11a	109.028	2.12838	0.394966	5.38878	7.09372e-08	7.91714e-07	64.3542	115.289	131.469	134.938	49.6473	133.933	27.3964	169.703	141.416	190.681	104.992	160.398	22.9556	109.447	98.8049	89.0249
Pecr	334.144	-1.87891	0.34869	-5.38848	7.10579e-08	7.92499e-07	125.129	297.317	249.97	206.942	729.221	280.632	873.964	134.37	238.166	124.586	286.473	220.58	681.613	285.766	274.899	336.677
Mettl17	196.524	-1.08558	0.201539	-5.38646	7.18592e-08	8.0087e-07	250.756	190.975	155.356	118.802	301.187	194.641	270.685	155.03	151.248	123.455	215.321	186.358	353.231	148.115	170.751	158.471
Pdgfrl	102.781	3.00133	0.557286	5.38563	7.21927e-08	8.04018e-07	59.5713	107.574	88.0501	223.026	29.2929	56.4365	20.1796	357.056	176.98	232.158	49.6055	38.8653	29.8293	27.1552	72.1626	76.5562
Kirrel3	111.068	3.03372	0.563522	5.3835	7.305e-08	8.1299e-07	128.783	159.462	120.57	68.9297	15.2646	167.467	25.3351	76.1488	134.434	72.7007	110.165	200.113	5.66234	154.321	149.302	188.437
Pik3r6	72.2387	2.06706	0.38399	5.38312	7.32072e-08	8.14165e-07	47.9636	54.9988	96.0259	113.041	26.3297	125.354	22.5906	118.093	80.5683	105.865	54.2391	80.8507	24.1421	93.0485	63.9569	48.751
Ccdc8	142.724	2.04613	0.380112	5.38295	7.32754e-08	8.14349e-07	67.8472	240.929	214.958	189.649	42.1629	117.28	34.9454	247.548	208.749	158.644	152.037	95.2622	79.7341	108.52	167.228	158.086
Snai1	46.5493	3.08504	0.573265	5.38153	7.38538e-08	8.20199e-07	54.5002	64.023	51.9177	63.4913	7.90555	41.3931	9.98441	125.395	50.4412	47.3332	49.1014	41.7817	7.97341	35.1398	38.7179	55.6894
Slc6a2	68.1118	3.59415	0.667992	5.38052	7.42702e-08	8.24242e-07	28.0098	55.1575	81.6596	133.728	7.96344	42.689	10.0575	139.926	107.093	225.3	27.7441	71.5489	10.7091	55.1728	45.64	47.3901
B3gnt7	47.908	3.49462	0.64972	5.37865	7.50456e-08	8.32261e-07	7.67429	31.422	70.4063	71.1333	5.19492	84.9253	4.92074	143.392	60.7499	41.7445	33.483	64.2464	13.0988	52.585	47.9076	33.6436
Cela3a	27.2064	-4.11731	0.765686	-5.37728	7.56175e-08	8.38014e-07	23.3572	16.0058	10.9301	3.29825	84.3258	9.8555	102.34	4.32398	4.65611	0	26.0297	6.68507	111.628	17.5699	0.823786	13.4732
Tmem54	71.2235	3.23066	0.601129	5.37433	7.68683e-08	8.51278e-07	105.297	108.372	61.6999	67.3749	0	69.4222	19.5135	194.448	92.201	61.0204	90.0648	41.1265	15.3036	77.5046	62.615	73.6121
Dnajc3	6786.66	-1.53855	0.286329	-5.37337	7.72802e-08	8.55238e-07	6009.48	4797.51	5475.05	5890.67	11866.2	5648.19	16479.3	2321.98	4064.01	4081.58	6993.1	5861.13	10325.6	5966.53	6198.16	6608.17
Smtnl2	79.2861	-1.97284	0.367364	-5.37027	7.86204e-08	8.69458e-07	114.359	67.4617	40.3773	50.4518	104.222	47.2428	159.337	59.0446	41.2773	53.1149	45.6274	45.9286	299.179	46.7165	41.0857	53.1517
Rtn4ip1	174.337	-1.40505	0.261642	-5.37013	7.86819e-08	8.69529e-07	67.6717	137.454	122.17	134.542	287.866	153.072	394.609	162.931	112.637	108.608	161.152	159.458	374.865	142.913	142.389	127.052
Fcgrt	605.29	2.29426	0.427242	5.36993	7.87659e-08	8.69847e-07	195.756	935.073	846.168	662.124	205.544	608.085	199.688	1743.1	735.666	473.332	703.984	435.365	204.651	784.444	432.487	519.169
2310007B03Rik	27.5953	7.07287	1.31744	5.36864	7.9334e-08	8.75508e-07	20.2517	15.3062	42.6804	38.8585	0	16.8892	0	139.515	34.9085	44.2697	25.3446	5.37003	0	14.8253	17.3312	25.9749
Rnf10	2846.03	-0.628615	0.117113	-5.36759	7.97936e-08	8.79963e-07	2597.89	2680.17	2608.14	2602.28	3862.23	2761.98	3928.3	2501.81	2333.74	2116.2	2983.51	2686.71	3857.08	2896.89	2274.87	2844.68
Ptx3	93.9616	5.08892	0.94835	5.36608	8.04676e-08	8.86775e-07	6.26995	80.302	122.482	157.981	5.19281	151.06	0	114.09	73.9735	98.1263	184.064	142.214	5.23738	170.272	114.241	77.8798
Asb16	130.554	-2.32678	0.433656	-5.36549	8.07307e-08	8.89054e-07	42.2654	117.095	80.1537	74.2106	276.694	102.497	451.795	37.8348	73.7218	40.5713	155.586	65.1794	268.438	102.319	97.2067	103.295
AC123072.1	119.82	8.47328	1.5795	5.36454	8.11561e-08	8.92818e-07	183.521	336.963	263.232	243.246	0	198.096	0	94.0465	78.3779	60.857	89.9206	171.305	0	125.056	72.4931	0
Pir	68.1286	2.3529	0.438608	5.36447	8.11858e-08	8.92818e-07	53.3043	70.0045	79.7115	117.045	24.2204	48.4195	11.0765	159.098	89.5335	135.704	49.878	44.3368	27.5194	36.6902	70.1695	73.3472
Smarcc2	2365.51	-0.982688	0.183291	-5.36135	8.26009e-08	9.07746e-07	2515.02	2571.3	1837.26	1705.15	3104.52	2641.57	3408.64	1475.47	1715.59	1427.44	2872.29	1923.11	3464.26	2637.27	2158.38	2390.85
Tspyl4	163.693	-1.67358	0.312185	-5.36084	8.28336e-08	9.09669e-07	50.0512	135.628	112.944	109.667	218.72	140.934	499.22	119.45	120.283	93.6261	104.71	132.866	388.039	135.391	131.806	125.75
Sec31a	3721.47	-0.958695	0.178978	-5.35648	8.4858e-08	9.31252e-07	3769.12	3449.61	3186.55	2973.35	6346.88	3505.66	5889.39	3111.09	2412.65	2311.85	4078.86	3089.57	4796	3932.62	3014.39	3675.97
Clptm1l	2739.01	-1.11052	0.207393	-5.35464	8.57282e-08	9.40147e-07	2119.95	2343.58	2421.92	2252.7	3802.57	2723.08	5808.43	1517.18	2144.14	1830.39	2689.93	2525.28	3883.05	2637.55	2434.29	2690.16
Ndufa9	666.995	-0.763466	0.142641	-5.35235	8.68205e-08	9.51464e-07	481.604	569.468	630.3	565.65	1138.4	619.911	978.472	604.816	569.598	491.017	624.712	653.465	900.995	612.879	595.597	635.038
Sprr1a	93.6398	6.87173	1.28406	5.35157	8.71945e-08	9.54898e-07	92.3166	57.2837	36.4335	22.2632	0	351.841	0	114.585	48.8892	21.3259	48.5098	219.772	0	384.47	40.3655	60.1804
Necap1	807.199	-1.25872	0.235293	-5.34959	8.8152e-08	9.64714e-07	621.747	663.817	710.453	658.825	1401.92	754.932	1642.44	376.727	613.831	488.416	908.08	778.81	1185.38	688.326	700.218	721.267
Cdc25a	911.746	-1.4729	0.275341	-5.34938	8.82549e-08	9.65169e-07	1092.23	630.964	727.759	697.58	1849.9	755.917	1777.22	361.052	609.175	467.09	1034.09	782.989	1355.48	851.623	759.53	835.34
Edaradd	414.09	-2.32451	0.434635	-5.34819	8.88404e-08	9.70898e-07	341.46	445.634	229.531	196.246	740.486	485.876	953.511	59.9952	228.926	102.469	379.205	312.527	986.045	392.739	386.355	384.436
Col14a1	4203.46	2.03168	0.380024	5.34618	8.98289e-08	9.80342e-07	1283.49	6130.02	5561.99	5905.2	1803.77	3651.92	800.762	4216.89	6464.93	6774.4	4107.36	3711.27	1458.53	4567.64	5578.09	5239.06
Serpinf1	924.114	2.299	0.430024	5.34622	8.98101e-08	9.80342e-07	192.198	1083.17	1227.79	1403.54	300.19	739.016	188.06	2039.48	1268.76	1475.82	848.382	883.364	415.77	915.883	1029.47	774.919
Islr	789.136	1.86234	0.348431	5.34492	9.04591e-08	9.86536e-07	294.2	1155.26	937.755	1288.5	345.835	704.859	233.624	1407.28	1113.16	909.109	947.904	556.833	400.177	749.683	735.829	846.174
Actrt3	9.53924	-3.53395	0.661281	-5.34409	9.08727e-08	9.90362e-07	6.67349	5.89686	2.73251	0.824562	31.6222	4.92775	47.4259	5.40497	2.32806	2.08058	5.32425	3.34253	23.9202	4.13409	3.29514	2.69465
Slc41a3	71.7201	1.8234	0.341309	5.34238	9.1733e-08	9.99047e-07	49.8357	79.1164	93.4113	100.834	41.9809	78.9371	20.706	130.7	106.437	71.2335	75.9848	57.4098	29.1096	81.2959	59.8768	70.6527
Lgr5	53.5558	4.30327	0.80563	5.34149	9.21841e-08	1.00327e-06	32.8442	93.4566	46.6017	73.1732	2.08493	29.098	8.23527	70.0506	70.2771	90.9615	41.8761	27.5518	0	38.5616	111.556	120.564
Il33	607.287	2.46939	0.462437	5.33994	9.29764e-08	1.01119e-06	126.406	626.779	949.637	837.571	138.079	644.065	67.7758	506.861	755.214	1077.52	743.506	751.631	213.878	802.014	803.632	672.011
Snx24	164.041	1.49172	0.279479	5.33751	9.42327e-08	1.02415e-06	164.878	175.803	175.066	189.543	82.4667	148.494	76.4647	223.403	225.424	261.739	106.847	203.387	59.0415	165.705	190.955	175.433
Casp6	327.935	0.991682	0.185807	5.33715	9.44186e-08	1.02546e-06	336.565	399.363	338.708	327.203	183.58	446.495	157.497	395.876	302.428	387.144	355.533	342.72	175.098	439.017	308.386	351.342
Hspb6	111.37	-2.12497	0.398205	-5.33638	9.4822e-08	1.02913e-06	155.829	161.025	48.6326	64.5576	216.68	88.7918	338.519	49.0602	75.4102	31.1556	57.8156	54.433	221.378	69.5308	67.7363	81.3587
Pald1	174.476	1.58245	0.296561	5.33601	9.50126e-08	1.02997e-06	147.929	187.015	210.403	206.141	94.8666	222.734	64.8987	371.862	227.374	190.893	182.208	137.044	95.6809	160.196	144.162	148.206
Slc25a39	1561.85	-1.34277	0.251644	-5.33598	9.50301e-08	1.02997e-06	1761.89	1261.66	1307.14	1075.9	2850.43	1415.51	2828.52	1337.09	894.392	574.125	1536.22	1211.16	3099.19	1377.31	1050.22	1408.83
Cyr61	249.094	2.27797	0.427181	5.33256	9.68364e-08	1.04883e-06	228.011	235.874	270.519	230.877	129.124	191.197	57.4104	697.241	399.65	513.903	169.784	148.743	61.1294	191.202	257.845	202.997
Entpd4	614.649	-1.19043	0.223358	-5.32969	9.8379e-08	1.06472e-06	764.13	576.97	479.358	447.78	755.322	562.582	1160.89	292.279	429.303	415.786	659.637	553.992	901.918	689.061	636.215	509.173
Surf2	299.567	-1.12761	0.211576	-5.32958	9.84386e-08	1.06472e-06	378.544	224.384	242.255	198.424	460.631	337.812	476.439	187.092	220.351	193.544	274.103	330.975	451.242	272.567	293.557	251.152
Zscan4d	20.4418	-2.92709	0.549266	-5.3291	9.8702e-08	1.06684e-06	22.245	16.8482	9.10838	9.89475	52.7037	16.7544	39.9376	1.62149	5.43213	17.1648	11.2401	20.8908	50.4982	9.3017	26.3611	17.0661
Mfi2	73.1901	6.7835	1.27321	5.32788	9.9365e-08	1.07326e-06	15.5715	101.931	87.4404	108.842	0	121.223	0	139.989	72.9458	57.216	95.2449	94.4266	2.6578	80.6148	91.4402	101.498
Sh2d1b1	57.2322	3.94174	0.739856	5.32771	9.94608e-08	1.07356e-06	23.3572	43.8052	42.8094	51.1229	5.27037	99.5406	0	116.207	109.419	112.351	28.9876	93.5909	10.6312	75.4472	60.9601	42.2161
Gypc	118.815	1.43049	0.268584	5.32605	1.00369e-07	1.08215e-06	140.101	132.517	139.681	154.64	65.709	115.058	55.2863	182.849	190.847	131.59	89.1004	106.11	64.9023	121.143	115.871	95.6322
Lmnb1	432.635	1.45869	0.273881	5.32601	1.00393e-07	1.08215e-06	159.598	368.353	554.827	462.269	207.599	403.767	229.448	648.841	648.399	543.957	389.058	518.026	194.425	584.989	519.563	489.035
Acsbg1	48.6059	6.56041	1.23204	5.32483	1.01048e-07	1.08845e-06	48.9494	42.4665	43.7296	64.4593	2.1086	45.7393	0	126.862	89.8378	54.9391	31.2895	56.3727	0	55.778	66.688	48.4756
Psmb8	263.055	1.83396	0.344427	5.32467	1.01135e-07	1.08865e-06	113.136	264.627	281.082	302.319	95.9016	306.457	104.402	454.997	272.464	395.343	321.085	362.506	76.7871	366.891	271.13	219.755
Lrrc39	24.2542	-3.44987	0.647933	-5.32443	1.01272e-07	1.08938e-06	13.347	35.3811	4.55419	6.5965	26.3518	25.6243	97.348	3.78348	6.20815	3.64102	23.6633	34.261	47.8404	19.6369	16.4757	23.3536
Sema3e	107.982	3.19069	0.599351	5.32358	1.01743e-07	1.0937e-06	137.33	117.261	101.082	126.136	19.7104	67.4146	18.6702	146.829	185.107	413.121	74.0914	89.1379	7.45486	61.6816	77.7914	84.9001
Lrfn4	90.1409	2.95398	0.555079	5.32172	1.02792e-07	1.10422e-06	87.2951	144.137	89.3067	88.5747	11.113	127.745	13.1581	247.146	89.9964	61.0447	176.24	49.336	25.4387	91.5291	52.1248	88.0691
Ndufs1	966.862	-0.688885	0.129473	-5.32069	1.03373e-07	1.10971e-06	853.327	810.18	892.628	876.922	1235.74	902.685	1480.32	767.888	838.843	914.83	825.059	1011.33	1361.62	833.383	1052.27	812.78
Igfbp3	4184.81	2.61303	0.491307	5.31853	1.04611e-07	1.12223e-06	4420.26	3452.8	4695.12	5964.85	1786.04	2228.3	483.224	10842.1	6654.19	11932.7	1833.37	3092.9	1182.95	2473.54	2792.99	3121.49
Cda	118.819	2.4437	0.459532	5.31781	1.05023e-07	1.12589e-06	116.326	192.991	113.879	102.664	13.1241	158.049	52.2117	243.498	113.303	101.485	164.402	104.043	13.2367	135.888	133.748	142.254
Zcrb1	352.704	-0.94413	0.177559	-5.31728	1.05329e-07	1.1284e-06	319.067	237.755	270.268	298.85	664.722	337.806	450.958	303.692	301.373	336.754	267.125	362.738	584.144	306.018	342.973	259.018
Ccdc88b	82.2298	2.86729	0.539442	5.3153	1.06482e-07	1.13998e-06	34.4797	94.3497	69.2237	112.14	5.27037	142.905	19.9688	179.986	90.7942	100.908	105.302	79.3852	21.2624	107.486	84.8499	67.3662
Otub2	86.386	-1.90361	0.358174	-5.31475	1.06802e-07	1.14263e-06	35.2625	58.8215	45.4447	74.0524	93.5868	78.6758	249.078	33.2408	46.4618	51.9036	53.1289	108.401	212.171	113.445	65.7623	62.741
Sars	2109.21	-1.08844	0.204829	-5.3139	1.07304e-07	1.14722e-06	2389.01	2019.87	1822.58	1687.97	2961.16	2167.14	3669.04	1305.35	1391.9	1011	2729.18	1791.21	3267.56	2180.48	1572.97	1780.89
Sulf1	1034.34	1.98696	0.373928	5.31375	1.07395e-07	1.14741e-06	355.373	805.972	1253.57	1838.54	555.283	753.247	408.858	1936.41	1497.55	2442.28	711.763	1093.71	271.055	763.818	890.368	971.596
Ggh	8122.02	-1.99535	0.375612	-5.31227	1.08266e-07	1.15594e-06	3821.69	6317.22	6196.43	5329.97	16003.5	8325.93	21960.7	1640.95	4768.64	3592.12	7630.24	6441.9	15665.1	7086.87	7841.62	7329.44
Tmem176a	1029.49	1.29127	0.24313	5.31103	1.0901e-07	1.16309e-06	580.424	1129.05	1313.16	1324.35	586.786	1295.6	563.237	1907.47	1032.36	923.533	1045.17	1137.47	559.727	1221.88	814.741	1036.81
Slc7a8	2982.88	-2.23159	0.420327	-5.30917	1.10127e-07	1.17422e-06	8344.09	1670.49	1369.9	1610.37	6843.57	2062.76	6449.93	1087.48	1478.32	757.331	2108.4	2206.91	6240.52	2449.45	1274.4	1772.18
Akap9	1758.55	-1.02535	0.193206	-5.30706	1.1141e-07	1.18709e-06	1222.79	1339.43	1642.19	1613.62	3293.36	1612.54	3257.24	1023.14	1441.16	1739.8	1335.52	1272.24	2188.08	1404.26	2002.77	1748.73
Ephb3	171.934	2.02772	0.382096	5.30684	1.11544e-07	1.18772e-06	110.548	289.063	207.849	198.406	50.3394	178.647	63.3349	371.854	223.975	202.183	170.558	108.891	73.4507	186.745	147.818	167.28
Klf5	535.655	1.59481	0.300715	5.3034	1.13667e-07	1.20951e-06	913.156	516.396	611.172	706.65	316.222	365.639	159.751	795.071	582.79	956.027	436.588	385.227	194.02	446.482	630.196	555.097
Egr2	30.9275	6.84935	1.29155	5.3032	1.13792e-07	1.21002e-06	14.2451	25.3954	106.205	36.9004	0	53.9253	0	57.5574	24.4621	39.9621	16.0667	53.2044	0	25.9208	17.2172	23.7788
Ntng2	36.4133	2.88964	0.544933	5.30274	1.14077e-07	1.21223e-06	33.0811	40.1576	48.9869	44.2947	2.26385	50.3476	5.99449	69.565	44.1136	30.3912	37.9156	36.4438	12.4273	47.4842	31.9686	47.1775
Slc39a10	352.264	1.79994	0.339452	5.30248	1.14243e-07	1.21317e-06	291.696	430.534	440.386	556.927	168.056	302.259	123.143	347.756	507.865	764.154	246.287	354.077	107.948	364.792	348.638	281.703
Itgb5	693.366	2.01844	0.380694	5.30201	1.14534e-07	1.21544e-06	493.005	760.863	914.082	1121.71	350.833	650.992	200.256	812.002	1064.74	1658.08	422.55	820.87	179.562	522.03	637.376	484.906
Emc4	411.013	-0.774179	0.146029	-5.30155	1.14823e-07	1.2177e-06	375.075	290.137	375.959	362.862	705.538	359.877	576.182	382.095	363.926	344.223	378.951	373.995	624.085	363.825	305.157	394.32
Fbln7	101.569	3.42889	0.647294	5.29727	1.17547e-07	1.24504e-06	17.8956	155.024	205.17	215.586	15.8996	82.2586	0	145.121	117.054	145.41	98.1576	105.039	32.0722	77.9481	97.7508	114.712
Ptpn22	65.156	4.08591	0.771326	5.29725	1.17559e-07	1.24504e-06	39.1171	51.7154	65.0138	74.6732	12.4248	75.7892	1.93201	40.2729	129.108	149.121	28.2191	124.312	4.11438	99.9971	64.8262	81.8596
Cyp4f18	94.5769	3.4085	0.643541	5.29647	1.1806e-07	1.2495e-06	21.7791	90.3315	138.435	87.8745	9.14128	210.089	2.32745	181.432	109.577	109.963	116.967	94.2801	27.6593	149.043	95.6531	68.6773
Sirpb1c	44.1282	6.79031	1.28245	5.29481	1.19141e-07	1.2601e-06	18.0335	32.8761	51.5502	50.8812	0	34.1684	0	99.1518	57.0405	125.86	23.117	88.9838	0	41.1981	47.2783	35.9126
Efemp2	428.943	2.54104	0.480026	5.29355	1.19965e-07	1.26796e-06	100.346	502.84	573.354	536.169	101.678	392.662	78.2193	1175.88	463.026	428.035	528.685	360.376	178.114	603.722	345.258	494.721
Mef2d	1367.85	-1.01569	0.191889	-5.29314	1.20231e-07	1.26992e-06	2318.16	1328.21	1040.93	1008.92	2021.86	1268.76	1805.03	910.351	959.486	866.723	1570.27	1050.05	2116.22	1390.31	1087.98	1142.37
Sec61b	1236.57	-1.39879	0.26433	-5.29184	1.21091e-07	1.27815e-06	893.146	1005.22	966.301	832.226	2410.05	1115.33	2352.27	884.124	840.107	549.648	1666.18	795.256	2203.94	1031.18	1003.39	1236.71
Npl	77.8153	3.2677	0.617546	5.29143	1.21365e-07	1.28018e-06	12.613	80.3814	89.542	76.978	10.4226	86.5576	4.93625	167.2	106.388	121.808	69.9866	131.233	19.469	108.743	77.2393	81.5474
Dusp26	378.599	-3.0265	0.572054	-5.29059	1.21923e-07	1.28521e-06	998.438	204.718	179.954	140.773	1147.11	258.237	756.293	79.8561	77.3395	22.2371	405.594	162.561	1010.64	244.793	141.589	227.454
Cgrrf1	220.511	-1.21167	0.229086	-5.28912	1.22904e-07	1.29394e-06	293.539	180.586	153.674	198.026	483.197	206.573	317.122	175.114	142.568	153.86	186.614	159.527	365.013	163.094	179.67	169.995
Pkp1	29.1019	7.24728	1.37025	5.28901	1.22983e-07	1.29394e-06	7.5586	24.5957	47.7503	66.8073	0	4.78399	0	118.589	56.5034	85.1326	10.5214	0.811254	0	6.02022	10.3968	26.1603
Tank	560.576	-1.36913	0.258864	-5.28898	1.22998e-07	1.29394e-06	449.089	395.625	422.247	408.515	664.039	522.345	1402.67	239.746	484.662	478.665	424.072	643.061	940.882	514.054	468.455	511.096
Erlec1	1278.56	-1.05633	0.199736	-5.28864	1.23232e-07	1.29554e-06	1849.63	1036.43	1031.61	998.265	2005.02	1069.51	1898.26	756.28	1001.52	1121.52	1053.16	1232.04	2001.83	1092.12	1139.47	1170.33
Gp49a	37.9204	6.64688	1.25716	5.2872	1.24204e-07	1.30489e-06	24.4695	18.533	51.0069	65.1404	0	68.003	0	21.0794	55.0973	47.3332	24.2549	118.66	0	56.8438	32.9514	23.3536
Adamts8	62.3867	3.01779	0.570826	5.28672	1.24531e-07	1.30735e-06	13.4708	78.096	83.6045	76.5478	15.9578	59.7925	5.03853	128.677	108.26	98.7019	48.8351	60.1181	16.0948	61.675	80.5311	62.7861
Avil	95.7163	3.35808	0.635206	5.28661	1.24604e-07	1.30735e-06	79.8431	176.935	155.432	166.152	26.1601	2.66831	4.50535	256.682	89.9964	223.143	140.827	7.25402	18.4576	20.5201	67.7583	95.1268
Lyplal1	191.392	-1.20425	0.227832	-5.28569	1.25231e-07	1.31305e-06	165.418	195.375	174.464	132.852	289.908	177.2	393.409	115.469	127.257	111.912	167.376	226.079	263.397	198.048	174.146	149.96
Creld2	1478.95	-1.71477	0.324441	-5.28531	1.25492e-07	1.31317e-06	1215.69	940.97	1159.5	1229.42	3433.64	1151.12	3781.59	637.246	810.94	535.229	1807.88	1076.3	2227.24	1317.74	997.604	1341.04
Gprc5b	299.106	1.57319	0.297643	5.2855	1.25362e-07	1.31317e-06	586.155	323.485	331.545	378.474	142.3	208.937	97.348	465.909	362.401	356.82	255.564	305.842	148.837	280.085	274.321	267.668
Strip2	75.4154	2.3112	0.437278	5.28541	1.25422e-07	1.31317e-06	84.1031	123.835	124.451	108.251	26.3315	27.7617	17.1192	89.4667	85.5329	170.142	106.479	26.1392	17.6792	36.6459	84.6709	78.039
Klf14	55.5961	6.75708	1.2787	5.28435	1.26155e-07	1.31748e-06	10.0102	60.6534	48.2744	109.667	2.63518	41.3931	0	142.691	100.882	127.436	30.1707	40.1104	0	39.2739	71.6694	64.6715
Rgs14	49.5755	3.22419	0.610139	5.28435	1.26151e-07	1.31748e-06	13.7891	45.8182	58.4324	73.2116	10.0846	77.0788	2.50205	86.2108	44.4282	54.5663	47.4393	81.0154	7.99239	89.5604	44.5569	56.5215
Slc39a7	2506.08	-1.18423	0.224098	-5.28441	1.26111e-07	1.31748e-06	2700.23	2825.24	1930.03	1765.17	4013.51	2367.88	4461.69	2075.94	1722.57	1055.34	3025.31	1498.87	4297.44	2362.22	1851.95	2143.88
Mrpl15	576.54	-1.05761	0.200212	-5.28242	1.27489e-07	1.33053e-06	561.695	384.517	478.655	478.702	1230.21	474.691	790.131	444.749	489.999	375.691	587.342	599.819	933.592	468.757	503.993	422.097
Cndp2	832.166	1.00103	0.189521	5.2819	1.27851e-07	1.33342e-06	633.968	790.941	979.052	978.657	606.031	897.746	554.079	1397.52	929.578	798.342	849.428	1105.43	446.479	907.341	731.448	708.624
Ebag9	233.695	-1.2778	0.242021	-5.27972	1.2938e-07	1.34848e-06	233.572	172.694	182.168	170.684	447.981	231.604	434.322	107.559	212.629	210.659	170.376	249.019	337.541	183.967	218.303	176.05
Prelid2	71.7515	-1.61573	0.306097	-5.27849	1.3025e-07	1.35665e-06	34.4797	76.6591	52.8286	37.1053	126.489	91.6562	107.332	38.9158	45.0091	49.9339	72.1731	64.3438	164.784	71.3131	59.3126	55.6894
Nhs	50.1417	3.15056	0.596908	5.27813	1.30507e-07	1.35785e-06	56.3771	55.5012	65.529	105.141	4.68824	40.1637	4.44081	53.0253	78.669	109.712	33.8418	24.597	16.5497	47.3171	66.0009	40.7141
Plekhg2	284.857	1.31287	0.248739	5.27809	1.30538e-07	1.35785e-06	301.009	363.186	254.195	319.956	164.377	301.202	111.264	485.965	317.548	303.339	268.104	247.677	142.733	311.392	331.154	334.613
Tesc	75.0593	2.83566	0.537265	5.27795	1.30637e-07	1.35798e-06	37.12	82.8951	78.5822	69.9904	13.3135	93.4042	31.1755	195.443	101.136	63.8194	93.1169	100.576	6.7139	72.9002	78.3781	82.3839
Focad	324.004	-0.956661	0.18127	-5.27753	1.30934e-07	1.36018e-06	270.818	318.282	247.242	288.508	418.864	241.174	546.294	217.483	237.255	301.284	335.364	318.071	472.02	357.547	294.195	319.668
Cacna1g	87.3474	4.51008	0.854649	5.27711	1.3124e-07	1.36245e-06	11.5182	185.568	68.2897	114.733	16.8525	71.0881	0	216.601	108.309	126.473	51.2591	70.1842	4.86212	138.102	121.329	92.3916
Gm15922	35.7846	6.66864	1.2639	5.27625	1.31855e-07	1.36795e-06	25.5817	22.745	26.4143	76.6843	0	74.9018	0	47.5638	43.4571	61.8973	37.8613	59.33	0	33.0727	37.8941	25.15
Arhgap42	175.836	2.26842	0.430079	5.27443	1.33166e-07	1.38064e-06	143.37	181.044	177.264	242.861	63.3359	105.709	44.9782	246.414	258.926	552.083	118.428	180.389	36.4664	106.701	195.14	160.263
Adm2	176.326	-2.18355	0.414016	-5.27406	1.33435e-07	1.38252e-06	121.235	230.82	122.963	91.5264	342.574	165.572	366.927	60.5357	65.1856	30.1684	285.143	171.305	446.511	109.553	88.1451	123.056
Srp54b	2462.19	-1.31345	0.249064	-5.27353	1.33825e-07	1.38564e-06	1853.61	1762.45	2395.39	1993.93	5237.08	2134.88	4607.06	1159.53	1705.31	1405.61	2647.08	2214.93	3672.63	2312.14	2033.15	2260.27
Tmem221	226.719	-1.87258	0.355142	-5.27276	1.34385e-07	1.39052e-06	106.776	219.026	170.327	129.456	434.805	240.474	389.392	102.154	138.907	76.9815	267.987	149.578	659.135	205.671	149.105	187.727
Anxa3	634.278	1.81599	0.344446	5.27223	1.34779e-07	1.39369e-06	383.726	540.826	674.931	752.001	289.87	577.532	192.2	1392.32	925.014	1386.71	426.531	650.958	316.278	534.331	522.28	582.942
Ccbl1	253.377	-1.38546	0.262872	-5.27049	1.36062e-07	1.40604e-06	288.025	256.427	164.006	168.925	417.615	274.24	424.705	197.5	174.774	118.485	244.971	139.106	541.58	217.028	185.85	240.786
Tomm40l	352.666	-1.24349	0.236051	-5.26787	1.38014e-07	1.42527e-06	316.689	304.015	258.759	252.334	512.968	397.424	650.768	271.833	211.091	182.848	486.525	260.935	602.247	419.303	236.575	278.339
Mecr	390.873	-1.50008	0.284881	-5.26564	1.39703e-07	1.44177e-06	316.772	382.569	325.205	258.509	781.488	375.691	874.47	239.261	286.177	123.671	395.474	263.346	695.439	292.988	352.78	290.119
Pdhb	836.895	-0.740617	0.140771	-5.26116	1.43153e-07	1.47641e-06	820.84	661.29	804.27	811.369	1307.05	754.932	1178.16	624.274	686.001	647.061	844.781	844.825	1177.41	787.544	728.227	712.285
Tpt1	38027.6	-0.942824	0.179212	-5.26095	1.43312e-07	1.47708e-06	51372.5	28681	32839	32130.9	68065.2	33159.7	53357	31469.3	28789.4	29850.7	32994.2	34439.6	59122.3	30089.2	31806	30275.2
Acvr1	333.411	1.09917	0.208974	5.25982	1.44198e-07	1.48503e-06	266.359	362.196	388.445	449.289	185.529	309.512	251.282	455.859	403.138	513.875	285.158	299.586	160.636	294.682	343.721	365.317
Guk1	545.603	-1.45114	0.275897	-5.25972	1.44272e-07	1.48503e-06	635.523	462.092	364.775	341.94	718.804	542.924	1192.53	454.616	313.974	233.444	668.756	332.309	1116.5	505.315	365.489	480.659
Amy2b	87708.2	-2.69657	0.512948	-5.25701	1.46414e-07	1.50609e-06	95072.8	54174.4	55883.5	43910.4	233564	76662	245821	6849.18	34234.8	13818.2	84096.5	60312.7	205552	67482.8	62465.2	63431.1
Mycbp	249.04	-1.4231	0.270776	-5.25563	1.47521e-07	1.51649e-06	140.842	201.299	184.264	202.992	321.71	261.844	703.597	165.665	150.43	212.134	203.428	203.053	395.326	188.376	267.889	181.792
Dmxl2	608.883	-1.23874	0.235737	-5.25475	1.48222e-07	1.52271e-06	723.683	479.252	459.638	424.363	976.134	643.372	1136.76	274.434	560.495	419.888	553.82	644.508	925.125	482.874	514.479	523.304
Clip1	1459.35	-1.05389	0.200572	-5.25442	1.48491e-07	1.52447e-06	2012.79	1164.58	1271.38	1235.78	2726.41	1268.63	2078.24	865.724	1169.16	958.911	1591.92	1126.63	2266.44	1373.55	1135.11	1104.33
Cuzd1	40207.8	-2.49352	0.474625	-5.25367	1.49097e-07	1.5297e-06	51319.2	28391.7	26581	20713.8	80386.2	35512.3	137765	4320.19	17263.3	8354.57	36443.9	31856	72760	33996.7	27488.1	30172.9
Sostdc1	339.15	-3.29935	0.62828	-5.25141	1.50942e-07	1.54762e-06	169.062	473.433	71.9562	37.9299	318.857	373.524	786.272	31.8893	153.652	65.5383	312.356	183.839	1073.75	302.822	467.91	603.601
Actb	12397.8	1.44684	0.275623	5.24934	1.52641e-07	1.56402e-06	9297.36	13029.9	14347.4	15247.8	8474.71	15467.4	4585.68	25949.5	12904.8	11947.8	15247.5	10626.6	5772.59	14611	9797.13	11057.6
Elk3	710.187	1.46016	0.278175	5.24908	1.52863e-07	1.56528e-06	474.325	818.316	783.157	806.735	362.663	757.92	304.848	1375.68	955.173	1159.77	551.728	667.078	402.599	608.871	714.396	619.729
Cdc123	922.375	-0.858584	0.163603	-5.24798	1.53778e-07	1.57362e-06	757.828	793.043	793.464	843.454	1322.18	875.387	1731.59	714.485	716.708	717.645	824.581	817.961	1117.29	871.055	986.458	874.879
Nuak2	133.716	1.93347	0.368555	5.24608	1.55369e-07	1.58888e-06	136.777	164.776	138.067	138.255	74.7249	173.837	40.9694	214.318	185.456	199.972	118.232	137.397	20.5287	175.02	109.759	111.37
Arl11	46.7404	4.80734	0.916626	5.2446	1.56618e-07	1.59958e-06	16.6837	38.7508	62.8478	62.6667	5.27037	51.2486	0	97.2895	67.5136	72.8203	45.5519	82.7277	2.6578	56.8438	33.7752	51.1983
Gm10704	16.7993	-23.7376	4.52605	-5.24466	1.56568e-07	1.59958e-06	0	0	0	0	268.789	0	0	0	0	0	0	0	0	0	0	0
Arl6ip1	1027.93	1.17272	0.223765	5.24086	1.59832e-07	1.63134e-06	716.288	926.649	1105.76	1177.48	708.864	869.255	414.353	1550.69	1263.36	1631.7	837.09	1232.56	574.085	1176.15	1112.93	1149.72
Plau	413.017	1.18295	0.22574	5.24032	1.603e-07	1.63506e-06	220.225	343.702	452.686	580.492	255.613	591.33	224.649	582.116	633.231	469.171	231.309	632.575	263.122	439.247	349.285	339.525
Cml1	182.981	-2.58292	0.493082	-5.23831	1.6205e-07	1.65184e-06	176.629	128.046	102.058	49.3025	367.8	228.614	228.354	64.1488	90.1445	38.8076	161.843	75.6272	776.926	137.065	151.672	150.664
Zfp423	68.736	3.0184	0.576357	5.23703	1.63182e-07	1.6623e-06	17.301	61.9871	96.0568	157.807	12.5679	60.0039	11.9046	93.3285	133.134	55.1401	42.7245	18.7882	19.9191	99.2568	114.877	104.98
Tspo	211.591	1.76546	0.337216	5.23541	1.64622e-07	1.67589e-06	249.144	263.674	244.104	229.228	86.961	240.474	82.3714	531.849	204.869	146.681	278.044	149.578	98.3387	239.777	169.7	170.661
Gm10334	7004.32	2.01139	0.384377	5.23285	1.66912e-07	1.69811e-06	5511.19	10447.5	4684.44	4817.92	1394.01	9997.42	1372.86	9251.15	9304.47	4293.8	12845.6	7635.18	2453.15	7418.63	7806.19	12835.5
Vsig1	29.123	6.80957	1.3017	5.23128	1.6834e-07	1.71153e-06	72.0653	35.4261	52.0121	56.1984	0	7.86039	0	77.2026	28.2797	57.9353	16.0322	5.03349	0	3.85387	28.67	25.3991
Cyfip2	943.299	-1.89573	0.362393	-5.23113	1.68475e-07	1.71179e-06	749.011	993.439	626.507	446.658	1217.69	1073.68	2386.8	237.689	607.505	373.153	1092.82	693.585	1744.16	1070.6	918.866	860.628
RP23-203H5.3	18.3159	-3.24601	0.620581	-5.2306	1.68964e-07	1.71566e-06	14.4592	10.1089	10.9301	4.12281	47.4333	17.7399	42.4337	2.16199	6.20815	2.60073	19.5222	10.0276	71.7607	10.3352	11.533	11.6768
Selp	132.603	2.15946	0.412937	5.22951	1.69959e-07	1.72465e-06	236.186	167.858	93.7217	184.13	57.9174	190.23	18.8465	194.065	125.667	149.899	187.845	95.8599	35.8836	142.416	110.575	130.551
Slc9a4	49.6461	6.51738	1.24643	5.22884	1.7058e-07	1.72984e-06	77.5747	79.1686	83.0218	74.8711	1.85008	52.0743	0	62.5719	83.1852	38.4777	32.788	91.7392	0	28.3988	48.7502	39.8662
Gorasp2	3476.05	-1.56046	0.298525	-5.22725	1.72049e-07	1.74361e-06	6226.41	2359.48	2695.07	2492.89	8290.8	2647.2	5876.89	1736.42	2059.96	1478.92	3480.86	2704.5	5704.16	2753.56	2325.64	2784.07
Reg3b	339917	-2.19867	0.421175	-5.22034	1.78598e-07	1.80882e-06	264245	217858	252104	158289	850339	329351	1.42639e+06	126033	184904	132780	291313	357389	206761	265436	216839	158648
Pqbp1	492.525	-0.953541	0.182785	-5.21674	1.82099e-07	1.84309e-06	398.908	376.747	433.056	405.036	915.91	398.292	866.679	429.485	387.793	337.207	451.24	400.597	624.696	504.606	466.844	483.303
Kars	1744.07	-0.928863	0.178059	-5.21661	1.82224e-07	1.84317e-06	1782.84	1518.66	1594.6	1424.3	2729.21	1769.15	2787.1	1219.07	1345.51	979.274	1929.76	1526.97	2452.84	1743.93	1476.27	1625.64
Ror1	303.902	1.63734	0.313892	5.21627	1.82565e-07	1.84544e-06	114.562	291.473	361.603	501.334	202.909	303.549	109.829	410.237	485.788	431.72	176.883	350.966	111.628	384.47	344.342	281.141
H2afy2	59.4171	2.25263	0.431923	5.21534	1.83484e-07	1.85354e-06	42.2654	65.7078	88.3513	70.9124	15.8111	54.2053	9.98441	123.774	62.8575	79.5822	50.2846	50.138	29.2358	67.179	76.6121	63.7733
Cars	873.477	-1.57432	0.301898	-5.21475	1.84063e-07	1.8582e-06	404.575	656.53	768.65	677.367	1751.61	807.744	2047.43	542.729	401.327	450.555	1087.04	673.015	1538.81	813.73	635.77	718.754
Ptpn1	872.76	1.10702	0.212348	5.21324	1.85566e-07	1.87217e-06	650.072	663.293	1271.21	1267.81	480.082	1069.51	568.164	836.668	832.703	1071.28	863.457	1232.64	414.569	1003.27	909.704	829.74
Apobr	141.276	1.59487	0.306018	5.21167	1.87147e-07	1.88671e-06	80.0066	146.396	154.446	157.828	32.2273	235.498	56.9334	179.052	161.549	182.197	123.69	200.432	65.0379	216.7	133.467	134.956
Smurf1	610.006	1.0369	0.198961	5.21157	1.87246e-07	1.88671e-06	784.856	618.908	661.944	784.597	266.942	690.329	389.002	790.1	698.191	738.637	498.707	651.672	415.608	602.256	572.238	596.103
Hibch	650.303	-1.66347	0.319218	-5.21109	1.87735e-07	1.89043e-06	459.347	639.051	506.114	364.817	1206.5	646.878	1176.45	196.928	495.529	299.162	652.139	540.718	1327.42	569.322	709.119	615.35
Pck2	303.41	-1.74884	0.335654	-5.21024	1.886e-07	1.89792e-06	276.95	215.656	179.435	133.579	592.916	414.917	703.901	149.177	249.878	93.6261	380.388	264.06	497.009	251.146	237.25	214.673
Tlr1	79.0216	4.45931	0.856235	5.20805	1.9084e-07	1.91924e-06	11.1225	122.149	93.8163	71.7369	7.90555	94.6128	0	132.962	83.81	195.054	45.5519	136.208	5.3156	87.8494	97.2067	79.043
Cbr3	68.1289	2.9141	0.559584	5.20762	1.91275e-07	1.92239e-06	78.9697	70.7623	67.402	112.965	21.0815	41.3931	7.48831	185.931	77.6019	153.963	53.2425	38.4391	15.9468	51.6761	49.4271	63.7733
Flrt3	123.584	2.1891	0.420706	5.20339	1.9568e-07	1.96541e-06	86.3169	113.745	137.695	142.931	33.7915	77.0093	31.6079	165.556	176.524	359.317	75.0877	140.273	37.1596	119.936	171.077	109.311
Slc31a1	1605.4	-1.0816	0.207874	-5.20313	1.95959e-07	1.96696e-06	1377.2	1322.11	1358.29	1382.3	2548.98	1468.65	3382.62	898.289	1263.95	1215.47	1436.09	1486.25	1845.43	1516.05	1549.99	1634.64
Mrpl53	191.05	-1.33639	0.256861	-5.2028	1.96312e-07	1.96924e-06	163.334	152.612	149.354	113.891	374.53	159.703	324.783	165.881	129.711	99.7889	300.138	134.445	360.889	159.17	127.801	140.765
Smo	602.162	1.01466	0.195042	5.20224	1.96896e-07	1.97385e-06	423.767	732.053	655.803	676.141	361.02	628.781	324.493	817.232	718.593	682.951	624.12	523.942	380.066	697.628	663.147	724.86
AI467606	105.304	2.25506	0.433786	5.19855	2.00845e-07	2.01216e-06	35.592	127.204	151.199	150.07	39.5277	142.905	22.4649	169.716	124.939	145.12	111.809	155.428	31.8936	117.822	77.4359	81.7376
Qsox2	1528.65	-1.5347	0.29523	-5.19833	2.01083e-07	2.01326e-06	1208.47	1336.27	1134.46	953.305	2634.42	1370.54	2970.54	529.449	1237.17	758.522	1665.85	1150.71	2766.32	1410.5	1684.57	1647.29
Stk10	205.545	1.68441	0.32428	5.19431	2.05478e-07	2.05595e-06	106.916	248.775	199.481	254.945	108.667	251.003	56.8929	331.552	287.615	241.749	209.878	197.916	86.9169	303.165	206.539	196.716
Pmp22	750.846	1.24552	0.239792	5.19415	2.05652e-07	2.05639e-06	506.982	818.434	863.49	1001.53	557.683	682.928	245.39	1017.22	1044.8	952.395	725.324	760.855	439.1	817.865	817.584	761.955
Nme2	3249.83	-1.07552	0.207108	-5.19303	2.06895e-07	2.06751e-06	3232.99	2782.48	2575.87	2330.38	5307.18	3171.42	5353.86	3252.32	2252.58	1588.68	3836	2376.4	5798	2941.25	2407.35	2790.45
Pip5k1b	211.023	-1.8654	0.359221	-5.19289	2.07051e-07	2.06775e-06	271.704	196.672	117.538	107.506	263.732	207.96	559.999	71.814	145.046	68.4682	236.383	171.899	382.46	184.165	190.508	200.514
Atp6v0d1	1112.94	-0.618048	0.119023	-5.19267	2.07301e-07	2.06894e-06	997.771	962.754	996.334	1122.72	1822.8	1037.01	1574.37	1165.85	963.964	784.608	1050.58	991.142	1497.13	1063.63	852.014	924.296
Cysltr1	184.385	2.72162	0.524219	5.19176	2.08318e-07	2.07778e-06	23.9159	166.342	196.814	259.295	24.3936	252.405	30.7858	155.091	222.655	447.997	166.082	301.882	40.5198	232.778	249.248	179.951
Dennd2d	514.122	-0.974087	0.187634	-5.19141	2.08703e-07	2.08029e-06	382.118	583.209	441.184	357.004	639.821	526.342	876.465	318.604	393.291	470.302	491.253	455.486	705.039	459.086	587.253	539.49
Mrps18b	405.383	-1.07432	0.206947	-5.19128	2.0885e-07	2.08045e-06	395.137	282.977	364.751	328.837	791.13	346.572	706.507	301.401	298.803	247.611	448.149	412.715	544.33	376.995	274.494	365.715
Atp2a3	455.724	1.58303	0.305126	5.18814	2.12406e-07	2.11454e-06	567.355	604.755	562.214	600.783	234.966	378.502	103.581	916.035	478.072	450.324	568.298	246.418	304.802	356.489	428.889	490.106
Emc6	436.459	-1.07453	0.207213	-5.18564	2.15269e-07	2.14168e-06	566.296	291.223	369.916	318.542	869.227	364.138	618.131	355.5	338.992	317.898	498.606	356.756	697.665	383.91	320.69	315.855
Mrps34	266.086	-1.33226	0.256921	-5.18549	2.15447e-07	2.1421e-06	348.013	217.4	191.433	181.163	459.726	232.385	481.781	235.963	172.033	110.44	334.144	146.846	534.95	231.293	200.146	179.658
B3galnt2	772.079	-1.10377	0.212933	-5.18365	2.17589e-07	2.15998e-06	436.001	603.164	652.16	634.088	1370.29	728.322	1240.56	423.75	575.03	746.928	811.061	674.356	1068.44	762.74	868.27	758.094
Faxc	86.7352	1.81237	0.349636	5.18359	2.17656e-07	2.15998e-06	55.0564	82.0965	103.329	115.451	35.7752	90.2167	29.3688	114.15	109.741	171.467	60.2891	96.6271	29.2359	110.879	85.5318	98.5469
Gstk1	289.522	-1.59338	0.307377	-5.18378	2.17428e-07	2.15998e-06	436.001	176.906	218.601	182.228	758.933	184.298	486.74	187.012	230.478	123.795	207.646	199.716	605.979	203.604	186.999	243.416
Esyt1	893.681	1.26415	0.243995	5.18105	2.20645e-07	2.18826e-06	539.441	1104.4	1208.68	1212.11	384.737	975.695	516.693	1065.86	1120.57	913.895	1113.36	782.989	536.876	1201.99	791.658	829.951
Crp	132.239	1.78187	0.343997	5.1799	2.22005e-07	2.20037e-06	104.46	72.2768	214.93	218.59	79.0846	92.6759	22.4732	144.239	166.038	192.525	102.973	148.798	61.152	163.357	181.3	150.956
Stx5a	1270.58	-0.932089	0.179953	-5.17963	2.22323e-07	2.20213e-06	1379.44	1131.92	1217.18	1016.29	1966.8	1148.38	1963.43	777.291	966.686	856.163	1320.65	1170.36	1755.89	1157.89	1180.47	1320.49
Grpel2	613.187	-0.923143	0.178255	-5.17878	2.2334e-07	2.21082e-06	709.615	518.081	531.929	438.667	1038.26	570.634	773.792	369.16	502.86	515.984	645.417	615.026	805.314	546.734	607.954	621.565
Slamf9	126.057	2.6716	0.516072	5.1768	2.25725e-07	2.23302e-06	18.9082	117.095	193.098	219.334	23.7166	185.283	19.9688	192.417	148.22	229.904	105.893	144.565	45.1826	151.928	124.392	97.0073
Smco4	208.726	-1.37196	0.26503	-5.17662	2.25942e-07	2.23377e-06	137.402	168.724	145.562	136.62	383.217	205.654	351.105	193.993	134.148	96.3841	246.865	177.785	453.036	167.399	163.957	177.761
B3gnt3	426.361	2.66631	0.515117	5.17612	2.26542e-07	2.23829e-06	1970.9	328.539	474.546	296.842	71.1499	270.041	64.8987	755.075	478.028	463.449	376.838	333.418	100.996	285.252	265.259	286.531
Gnptg	382.053	-1.17624	0.227285	-5.17517	2.27708e-07	2.24841e-06	444.967	324.225	300.068	317.314	633.781	390.158	661.756	276.969	274.696	183.005	376.267	251.67	684.973	325.612	321.884	345.505
Cml5	11.3633	-4.36969	0.844588	-5.17376	2.29432e-07	2.26401e-06	0	3.36963	3.64335	2.47369	63.2444	3.9422	24.961	0.540497	2.32806	1.56044	7.69058	6.68507	45.1826	14.4693	0.823786	0.898215
Gpr65	75.8844	2.76926	0.535527	5.17109	2.32738e-07	2.29519e-06	34.4797	75.8167	80.1537	112.14	26.3518	83.7718	7.48831	89.182	97.0023	184.652	42.594	124.509	7.97341	96.1176	88.1451	63.7733
Arhgap19	184.067	1.70074	0.328939	5.17039	2.33603e-07	2.30228e-06	92.1255	155.985	215.087	199.918	43.1479	188.525	93.9763	245.799	297.993	283.63	112.049	226.514	88.9243	323.693	189.552	188.147
Sugp1	643.887	-1.25197	0.24219	-5.16938	2.34877e-07	2.31339e-06	522.757	656.236	601.153	477.422	1212.18	614.983	988.457	404.832	462.507	277.757	757.226	456.256	1273.09	534.331	512.395	550.606
Atp5j2	1100.51	-1.0438	0.201972	-5.16802	2.36586e-07	2.32877e-06	767.59	852.898	926.975	760.694	2012.5	1013.88	1837.09	1224.64	852.115	594.868	1017.05	876.925	1975.13	1079.04	871.85	944.92
Gabra3	191.647	2.20539	0.427038	5.1644	2.41213e-07	2.37283e-06	163.253	249.594	322.753	274.737	96.908	146.785	14.7604	177.649	220.096	313.059	210.991	207.59	51.6401	221.393	254.006	141.134
Txnl1	1156.77	-0.868016	0.168212	-5.16024	2.46631e-07	2.4231e-06	973.218	759.852	1109.4	1099.97	2221.46	940.215	1834.64	872.903	983.992	1146.4	1030.54	1086.32	1506.97	988.048	1005.02	949.414
Zc3h15	1402.28	-0.900012	0.17441	-5.16034	2.46508e-07	2.4231e-06	1126.39	1001.02	1195.7	1207.69	2719.76	1224.6	1936.03	1089.48	1115.11	1329.51	1431.97	1502.46	1792.82	1250.58	1349.41	1163.87
Traf3ip3	47.253	4.45415	0.863785	5.15654	2.51549e-07	2.46989e-06	17.6178	57.7791	25.9222	73.9859	1.79632	85.5684	1.70151	83.1413	62.4435	102.428	24.4744	44.0997	6.08863	45.1038	63.875	60.0218
Kctd17	196.206	1.92613	0.373645	5.15497	2.53677e-07	2.48922e-06	96.7108	276.987	210.501	244.387	65.5811	233.545	58.1638	422.495	239.618	204.346	210.855	140.202	96.9962	220.443	198.309	220.157
Vdac2	2835.56	-0.79234	0.153709	-5.15482	2.53877e-07	2.48964e-06	3158.09	2161.17	2580.63	2375.91	3842.95	2742.06	4629.44	2018.13	2377.12	2491.91	2571.62	3242.76	3671.06	2695.03	2394.12	2417.01
Ciao1	501.833	-1.01448	0.196812	-5.15456	2.54234e-07	2.49138e-06	415.285	441.973	390.587	416.926	906.875	582.964	700.6	410.141	331.971	307.507	558.92	443.047	742.238	470.909	482.617	426.771
Lrrc8c	554.11	1.27702	0.247751	5.15445	2.5437e-07	2.49138e-06	336.185	462.261	733.395	714.107	439.048	590.099	180.816	678.117	800.185	684.921	404.968	634.488	286.387	830.046	516.777	573.962
Rarg	288.533	1.35443	0.262855	5.15276	2.56674e-07	2.51238e-06	342.229	313.822	290.172	409.713	167.68	271.486	126.34	488.354	370.314	429.743	259.024	246.088	162.854	248.882	235.229	254.596
Trim14	54.4731	2.59603	0.503846	5.15242	2.57145e-07	2.51542e-06	31.4127	53.1542	54.8345	69.5378	2.43371	62.6741	18.2997	62.0737	52.147	74.7122	66.6526	85.0501	10.8565	88.2615	84.4607	55.0088
Grap2	50.6421	3.45094	0.669933	5.15117	2.58863e-07	2.53066e-06	17.796	31.1691	69.2237	96.4738	0	58.1475	4.9922	45.9423	92.3462	116.513	40.8192	42.6173	15.9468	72.3466	50.2509	55.6894
Qpctl	347.648	-1.12528	0.218556	-5.14867	2.62335e-07	2.56301e-06	378.165	323.485	265.965	258.913	500.685	353.813	641.498	248.088	266.95	165.406	420.616	262.389	558.138	359.666	239.722	318.866
Epb4.1l2	583.55	1.51857	0.295151	5.14504	2.67461e-07	2.61148e-06	283.38	710.319	795.05	956.589	314.774	393.693	227.213	546.419	893.535	846.098	616.68	548.587	293.468	521.825	648.248	740.921
Pcsk6	442.122	-1.10913	0.215656	-5.14304	2.70328e-07	2.63783e-06	373.542	480.318	335.276	303.402	852.078	435.65	516.03	251.086	376.008	355.347	417.522	337.295	676.727	503.165	424.387	436.115
Col5a1	3894.67	2.31179	0.449511	5.14289	2.7054e-07	2.63827e-06	514.778	4948.58	5584.04	5026.1	1350.98	3326.3	1101.94	8620.97	6155.49	5273.99	3260.33	3460.93	1381.5	4018.07	3941.74	4349.05
Fzd7	146.967	1.47864	0.287563	5.14198	2.71862e-07	2.64952e-06	147.929	222.396	159.397	176.456	76.4203	150.789	49.922	188.093	200.213	217.421	127.19	113.646	69.1029	144.693	162.286	145.511
Fam3c	657.907	1.05755	0.205687	5.14154	2.72502e-07	2.65412e-06	421.361	500.982	777.342	1004.25	373.13	521.409	550.575	1117.63	905.118	952.032	471.007	651.505	448.179	554.213	651.128	626.645
Chsy3	51.6467	2.76591	0.538034	5.14078	2.73603e-07	2.6632e-06	20.0205	63.1806	76.5104	75.0352	10.5407	39.422	12.4805	74.5886	55.8734	113.392	40.8192	39.2748	7.97341	50.6426	67.5504	79.043
Srpx2	229.642	1.82398	0.354816	5.14063	2.73825e-07	2.66371e-06	129.226	244.988	273.019	348.995	79.1073	161.562	108.522	456.067	340.585	479.284	132.773	223.931	113.341	155.649	205.675	221.545
Wnt4	239.379	2.19277	0.426591	5.14023	2.74403e-07	2.66769e-06	537.216	195.439	314.239	291.895	100.137	162.616	49.922	615.626	304.975	268.915	154.995	177.99	100.996	172.598	170.524	211.979
Rpl10	21263.2	-0.935679	0.182121	-5.13768	2.78146e-07	2.7024e-06	30744.2	17627	18590.7	16340.3	33430.5	19972.6	28541.9	16174.4	15844.2	12867.1	22567.7	19419.8	34072.4	18987.4	17206.2	17825.1
Vmn1r180	14.3583	-3.64525	0.70953	-5.13755	2.78348e-07	2.7027e-06	11.1225	17.6906	5.46503	1.64912	36.8926	17.7399	22.4649	1.08099	2.32806	4.68131	13.0148	12.5345	34.5514	10.3352	14.8281	23.3536
Iyd	36.806	-2.07054	0.403069	-5.13694	2.79249e-07	2.70979e-06	36.5604	32.7168	20.0179	18.1218	89.5045	31.5053	79.7935	16.1983	26.3576	17.6668	22.4571	21.7042	83.3003	14.4545	44.4389	34.0972
Cabp2	639.015	-2.49761	0.486266	-5.13631	2.80189e-07	2.71389e-06	173.112	413.411	361.899	205.008	2014.16	547.296	1581.79	384.944	351.311	67.2394	593.334	285.894	1922.55	496.979	384.442	440.857
CABP2	639.015	-2.49761	0.486266	-5.13631	2.80189e-07	2.71389e-06	173.112	413.411	361.899	205.008	2014.16	547.296	1581.79	384.944	351.311	67.2394	593.334	285.894	1922.55	496.979	384.442	440.857
Fam149a	1290.05	-1.27667	0.248553	-5.13641	2.80037e-07	2.71389e-06	1067.67	1385.4	1084.33	838.29	1525.68	1471.58	2428.45	596.995	810.919	767.987	1399.14	1184.96	2092.74	1318.71	1300.57	1367.3
Clec11a	147.665	2.61785	0.509921	5.13385	2.83879e-07	2.74794e-06	18.9082	158.373	245.015	232.527	44.7981	89.6851	27.4571	321.596	225.045	294.922	117.133	102.783	53.156	117.822	179.585	133.834
Tgif1	670.508	1.28894	0.251075	5.1337	2.84096e-07	2.74836e-06	1050.16	649.661	761.789	769.994	379.601	747.545	360.322	989.804	738.876	927.209	521.693	582.399	260.749	648.535	682.942	656.842
Arhgap25	89.6634	2.22972	0.434494	5.13176	2.87048e-07	2.77521e-06	30.9737	109.217	93.1326	102.61	19.8683	111.218	21.7025	144.072	112.497	131.452	72.2669	103.118	30.9153	142.802	120.604	88.1658
Ufsp2	869.595	-1.18917	0.231752	-5.1312	2.87908e-07	2.78182e-06	528.504	652.331	764.736	694.643	1260.66	735.586	1830.23	458.278	707.058	595.397	860.164	998.514	1392.85	843.592	813.837	777.129
Kcnc3	66.9696	-2.33927	0.455905	-5.13104	2.88149e-07	2.78243e-06	110.113	59.811	38.2552	20.6141	137.029	45.3353	184.712	28.6464	38.8009	17.6849	66.8489	14.2058	156.81	53.7432	48.6034	50.3001
Sdhb	1132.06	-1.21682	0.237167	-5.13065	2.88751e-07	2.78654e-06	1880.7	997.323	863.605	796.445	1924.1	957.084	1899.1	927.794	774.189	480.713	1217.91	732.209	2038.67	1021.21	726.359	875.557
Creg1	1005.34	-1.02598	0.200017	-5.12947	2.90558e-07	2.80226e-06	1388.36	814.566	906.355	779.914	1806.82	894.066	1641.25	648.065	785.843	707.792	925.648	852.088	1317.69	857.636	906.627	852.737
Rpl10a-ps1	121.586	-23.2162	4.52648	-5.12898	2.91318e-07	2.80788e-06	22.245	0	0	0	0	339.029	224.649	0	0	0	1359.46	0	0	0	0	0
Rab3d	4598.34	-1.59816	0.311688	-5.12742	2.9374e-07	2.82949e-06	5818.33	4553.32	3386.44	3042.32	7337.17	4960.54	8973.92	1587.68	2839.17	1601.39	5009.63	3209.19	8334.36	4761.37	3815.19	4343.37
Ctxn1	88.8069	2.43179	0.474293	5.12718	2.94111e-07	2.83134e-06	75.6329	101.089	85.6187	100.597	26.3518	73.9163	24.961	265.925	124.939	142	52.6509	76.0426	29.2358	91.9835	79.9072	70.0608
Ctbs	138.053	1.41153	0.275335	5.12659	2.95042e-07	2.83856e-06	104.988	148.989	185.527	179.018	54.9848	135.136	69.5939	150.908	208.185	214.479	115.796	148.162	79.224	145.821	135.055	132.978
Wtip	152.016	1.60257	0.312649	5.12577	2.96317e-07	2.84909e-06	182.525	205.334	176.836	136.267	69.9496	191.601	71.0546	299.934	189.84	127.145	211.598	105.981	58.1173	141.714	124.485	139.87
Pde10a	101.861	2.74933	0.536604	5.12357	2.99798e-07	2.88081e-06	129.076	124.489	104.923	155.788	22.2472	59.1356	13.6366	112.311	105.455	258.874	44.344	135.362	18.1673	98.6537	172.137	75.1755
Pex5	635.663	-0.923611	0.180304	-5.12253	3.0147e-07	2.8951e-06	685.939	541.609	565.794	476.539	863.604	689.771	1115.33	404.998	543.475	478.411	657.235	558.741	852.525	535.272	614.469	586.907
Fam78b	61.0981	2.48558	0.485339	5.12133	3.03391e-07	2.91005e-06	23.9794	62.7036	81.5575	117.62	32.4501	53.0735	6.59851	136.972	75.2181	79.8607	43.5831	75.1234	17.5718	65.2908	44.7514	61.2156
Sdf2l1	1331.79	-1.73879	0.33952	-5.12133	3.03396e-07	2.91005e-06	1156.74	1021	1003.74	969.685	2661.53	1208.28	3646.81	512.391	799.299	471.251	1651.11	818.921	1910.96	1077.96	1084.93	1314.09
Usp16	1052.76	-1.33329	0.260392	-5.12034	3.04989e-07	2.92356e-06	1101.81	662.406	901.637	801.706	2796.34	720.607	1723.46	619.621	818.722	627.237	999.401	1015.15	1421.79	830.892	956.051	847.307
Kctd15	68.6182	2.76948	0.541039	5.11881	3.07469e-07	2.94553e-06	34.4812	115.413	90.1791	79.1602	7.90572	58.1497	9.98458	165.907	90.0243	106.117	71.5839	38.4405	29.237	57.8788	62.5679	80.8611
Elovl7	220.466	1.43753	0.280908	5.11745	3.09693e-07	2.96504e-06	299.195	158.373	249.57	310.035	89.5962	216.821	124.805	266.465	276.263	323.53	180.433	278.266	90.3653	168.464	264.435	230.841
Slc28a2	128.842	2.02908	0.396597	5.11623	3.11708e-07	2.98251e-06	52.4428	128.741	162.356	211.166	39.7895	134.106	39.9065	132.734	204.342	207.695	104.143	195.292	53.821	182.457	113.712	98.7589
Gfer	276.592	-0.917667	0.17937	-5.11605	3.12005e-07	2.98347e-06	220.225	223.238	244.104	224.281	418.994	245.402	444.306	252.953	234.358	167.487	304.665	264.896	491.693	237.71	205.946	245.213
Sowahc	168.382	1.36447	0.26671	5.11594	3.12186e-07	2.98347e-06	186.858	171.851	204.028	224.281	121.218	127.136	47.4259	208.632	194.781	256.432	185.757	177.154	74.4185	158.129	175.466	180.541
Bcl2l11	263.764	1.78749	0.349509	5.11429	3.14931e-07	3.00788e-06	513.242	247.008	285.013	393.104	88.6949	204.395	130.524	399.193	370.97	394.29	179.745	256.674	96.5807	206.816	228.403	225.564
Sardh	881.258	-2.14634	0.419725	-5.11369	3.15932e-07	3.01561e-06	331.871	775.465	586.253	481.962	2071.41	1257.56	1978.6	399.693	415.27	224.238	1241.48	396.954	2200.56	675.794	491.596	571.416
Sypl2	11.908	-5.57645	1.09073	-5.11258	3.17783e-07	3.03144e-06	0	11.0262	3.97396	0	34.1282	1.70185	49.9675	0.466665	0	0.449093	7.15082	3.60743	69.5754	1.78469	3.59415	3.10207
A4galt	131.201	1.82891	0.357848	5.11087	3.20681e-07	3.05724e-06	85.9626	165.272	185.424	201.323	70.6555	112.25	29.7451	246.678	201.076	178.121	102.22	121.155	76.5406	127.245	116.165	79.3856
Rab11fip5	853.496	1.06291	0.207992	5.11035	3.21558e-07	3.06375e-06	1569.38	976.351	949.093	836.931	339.939	1065.38	461.779	1031.81	784.555	623.654	1139.39	842.319	491.693	944.64	842.733	756.297
Itm2c	1365.02	0.963299	0.188576	5.10828	3.25108e-07	3.0957e-06	1495.57	1726.74	1363.47	1508.7	783.786	1433.8	878.421	2175.82	1337.1	1248.9	1505.84	1145.78	794.776	1492.61	1426.67	1522.3
Pdap1	939.804	-0.638377	0.124988	-5.10753	3.26404e-07	3.10438e-06	792.648	870.214	871.823	826.28	1237.86	936.985	1416.42	799.603	806.436	706.29	933.641	935.413	1201.92	908.565	929.848	862.923
Phlda1	139.158	2.30383	0.451066	5.10752	3.26414e-07	3.10438e-06	83.9324	174.817	151.033	185.85	47.0974	134.064	44.6117	443.069	151.603	222.595	123.353	102.055	50.1407	99.5419	112.877	99.8878
Ccbl2	452.341	-1.48336	0.29047	-5.10674	3.27765e-07	3.11535e-06	664.261	355.857	448.985	265.253	956.229	256.529	953.287	261.53	344.924	198.969	397.578	275.106	857.578	299.016	435.022	267.324
Cdadc1	382.259	-0.791821	0.155139	-5.10396	3.32618e-07	3.15957e-06	314.132	307.198	366.619	352.873	695.984	325.921	487.861	291.246	336.125	342.656	338.408	377.078	562.295	321.645	372.516	323.585
Car13	83.6851	2.73059	0.535039	5.10354	3.33363e-07	3.16474e-06	65.6227	90.1377	124.785	97.2984	36.8926	53.2197	0	143.232	97.7784	199.736	53.8341	100.276	15.9468	72.3466	107.916	79.9412
Loxl3	179.723	1.84519	0.361822	5.09972	3.40161e-07	3.22733e-06	162.076	225.244	220.227	244.696	82.4386	91.5935	99.5058	335.64	264.325	278.619	99.6156	191.916	46.7221	147.599	179.714	205.628
Slc50a1	625.928	-0.978329	0.191858	-5.09923	3.41043e-07	3.23376e-06	656.692	595.503	573.756	461.572	994.078	476.176	812.968	547.012	450.191	402.979	532.895	657.373	1199.36	553.542	522.365	578.388
Tgds	227.774	-0.715417	0.140304	-5.09905	3.41365e-07	3.23486e-06	218.001	226.608	204.938	189.649	295.14	181.341	344.462	183.229	202.541	222.622	201.138	196.374	318.936	188.101	231.484	239.824
Josd1	746.741	-0.791687	0.155314	-5.09732	3.44501e-07	3.26262e-06	820.84	623.382	704.077	611.825	1220.09	668.203	970.984	544.281	644.096	588.804	766.692	639.26	1057.81	685.226	634.315	767.974
mt-Atp8	199.762	-0.925006	0.181498	-5.09651	3.45979e-07	3.27465e-06	172.399	139.84	160.307	141	305.681	166.558	346.958	203.767	182.364	190.893	139.614	159.606	329.567	195.336	195.237	167.068
Cwh43	70.6194	5.48437	1.07635	5.09536	3.48077e-07	3.29253e-06	208.629	97.2394	87.9897	118.974	2.52046	33.9352	12.0052	221.217	38.5963	90.5452	51.2149	40.1906	0	34.0888	52.3871	40.3783
Tpd52	2625.02	-0.714395	0.140305	-5.09174	3.54791e-07	3.35402e-06	3064.11	2660.64	2153.38	2151.01	3270.96	2746.53	3909.46	1838.32	2056.44	2014.66	3176.94	2368.91	2905.03	2727.94	2511.88	2444.03
Vash2	48.9179	3.25383	0.639092	5.09133	3.55554e-07	3.35922e-06	31.2075	52.3375	68.4543	73.538	10.5626	19.7518	5.00254	141.362	80.8731	114.148	24.8979	31.8198	13.3165	40.3909	36.3216	38.7032
Nptn	1394.35	0.927318	0.182146	5.09106	3.5607e-07	3.36007e-06	1424.72	1485.02	1542.06	1649	931.441	1238.68	962.587	1519.12	1885.73	1868.45	1284.09	1586.87	709.836	1631.62	1274.76	1315.65
Sh2d4a	481.312	-0.793465	0.155854	-5.09108	3.56039e-07	3.36007e-06	503.849	413.622	363.424	392.492	534.942	467.151	731.358	352.404	419.05	524.306	402.277	372.693	717.607	447.515	534.637	523.66
Reg2	333755	-1.95648	0.384434	-5.08925	3.5948e-07	3.39021e-06	345046	231260	255001	190300	827318	311486	1.01474e+06	100770	194418	112165	319095	297116	313397	279487	291844	256642
Alkbh3	241.567	-1.11372	0.218853	-5.08892	3.60117e-07	3.39419e-06	274.502	218.861	166.364	167.223	401.983	277.827	363.004	234.154	189.358	144.865	274.973	166.764	467.743	184.048	176.816	156.581
Ets2	1338.28	-0.801523	0.157514	-5.08858	3.60759e-07	3.3982e-06	1683.94	1462.42	1093.92	1024.11	1712.87	1285.16	2134.17	977.219	1219.9	992.957	1358.27	976.856	1791.36	1170.98	1313.11	1215.29
Stard8	476.312	1.54934	0.304491	5.08829	3.61308e-07	3.40135e-06	175.173	530.6	619.552	656.784	244.674	533.364	165.606	696.885	681.791	470.745	457.599	629.726	270.337	678.272	356.235	453.643
Ier3ip1	491.383	-0.80153	0.157545	-5.08764	3.62548e-07	3.41098e-06	431.328	433.052	371.039	467.425	787.04	433.653	785.979	370.327	457.927	468.701	522.168	459.551	603.657	422.139	449.843	398.292
Cd86	108.352	2.22193	0.436765	5.08725	3.63285e-07	3.41478e-06	45.65	96.7278	122.211	152.209	58.0722	97.1889	21.0962	184.437	183.315	197.027	74.9978	155.435	28.3905	132.996	98.8476	85.0324
Zfp521	206.937	1.54495	0.303694	5.0872	3.63385e-07	3.41478e-06	180.184	261.989	204.938	265.509	115.948	156.703	64.8987	276.735	315.84	402.592	144.346	167.127	93.0231	186.034	229.012	246.111
Aoc1	51.156	6.20976	1.2209	5.08621	3.65286e-07	3.4306e-06	36.8775	33.4684	66.6166	100.564	2.63098	51.167	0	266.137	79.4458	63.4038	13.5847	60.3014	2.65357	18.2495	9.0472	14.3485
Rabggtb	386.844	-0.930192	0.183014	-5.08264	3.72223e-07	3.49366e-06	392.712	296.204	340.204	322.056	527.932	301.045	547.132	277.739	283.994	374.4	353.396	461.51	672.546	344.726	335.777	358.127
Mapk11	38.3924	3.44366	0.677606	5.0821	3.73275e-07	3.50145e-06	33.3675	42.9628	52.8286	47.0001	0	43.3642	7.48831	110.802	51.2172	50.9742	28.396	45.1242	10.6312	33.0727	24.7136	32.3358
Esr1	141.413	2.33759	0.460021	5.08148	3.74503e-07	3.51089e-06	47.0919	113.504	224.309	185.498	35.9499	68.2139	47.8085	134.415	240.376	452.152	88.4059	127.349	33.9923	136.811	165.48	161.252
Mrpl50	681.2	-0.935333	0.184076	-5.08123	3.75007e-07	3.51351e-06	491.614	486.912	684.039	632.439	1146.3	526.284	1153.2	464.828	534.677	579.442	682.095	730.344	1017.94	624.248	551.113	593.72
2200002D01Rik	58.2668	4.68243	0.921579	5.08088	3.75689e-07	3.51759e-06	164.143	63.538	43.31	56.4561	0.891379	48.4332	0	226.175	46.1112	103.126	68.2184	38.6388	10.1765	13.1149	24.5741	25.3631
Rnd3	290.511	1.60998	0.316876	5.08078	3.75888e-07	3.51759e-06	209.125	250.442	288.144	390.748	131.076	233.067	91.8768	416.093	444.669	638.402	185.971	329.808	155.997	305.584	304.718	272.462
Dzip1l	122.866	2.17899	0.428891	5.08052	3.76403e-07	3.52032e-06	133.171	141.972	92.4714	247.094	42.1841	152.983	29.3647	190.29	135.86	234.192	143.027	88.0512	38.547	93.9539	110.433	92.2688
Rab12	362.108	1.26838	0.249718	5.07923	3.78976e-07	3.54228e-06	412.988	409.665	432.615	456.598	202.841	296.34	169.788	507.194	459.364	567.342	241.619	401.999	205.344	316.436	362.777	350.812
Gm6166	35.9483	18.0586	3.55627	5.07796	3.81504e-07	3.56379e-06	0	0.842408	0	0	0	123.194	0	0	111.747	89.465	0	0.835633	0	0	116.154	132.936
Parp4	464.984	0.991873	0.195337	5.07774	3.81952e-07	3.56587e-06	447.355	468.351	482.658	525.045	292.966	413.518	253.166	689.815	577.188	703.407	445.008	453.696	314.494	379.778	459.537	533.756
Asrgl1	325.135	-1.1374	0.224076	-5.07593	3.85604e-07	3.59783e-06	375.108	278.406	266.32	239.839	463.459	319.045	521.009	173.927	267.713	175.923	290.408	348.814	575.307	324.177	294.541	288.169
Cnpy2	1465.57	-1.06238	0.209362	-5.07439	3.88746e-07	3.62491e-06	806.38	1277.09	1271.53	992.773	2387.48	1356.12	2341.34	1171.8	1195.07	895.69	1423.94	1493.28	2524.91	1467.6	1358.42	1485.65
Cpne2	103.753	1.93766	0.381858	5.07428	3.88967e-07	3.62491e-06	61.0855	136.719	123.581	102.063	24.5662	95.4399	40.1716	169.655	136.526	126.933	161.373	96.4906	41.0198	133.489	108.093	102.846
Pdlim2	143.003	2.51941	0.496595	5.07338	3.90819e-07	3.64003e-06	91.6917	200.728	141.425	145.583	24.7523	169.444	16.1786	395.359	205.369	162.865	154.436	106.947	81.9955	157.3	105.317	128.662
Gli1	74.0173	3.03074	0.5975	5.07237	3.92888e-07	3.65713e-06	212.439	124.676	69.2237	96.4738	5.27037	35.4798	2.4961	162.69	98.5544	84.7837	66.2573	29.2472	31.8936	47.542	64.2553	52.9947
Cbr1	428.251	-1.22224	0.241064	-5.07021	3.97386e-07	3.69682e-06	489.389	354.654	301.487	259.737	822.177	395.206	616.537	429.695	310.408	239.787	502.254	249.019	842.523	383.437	308.096	347.609
Adcy1	49.8313	3.16468	0.624307	5.06912	3.99669e-07	3.71586e-06	16.8304	43.8428	43.3169	62.5688	17.0893	76.6919	5.3958	115.67	78.8431	67.4636	33.2484	88.5127	5.90827	58.0881	39.1769	44.6539
Clmp	168.43	1.78312	0.351923	5.0668	4.04563e-07	3.75914e-06	107.75	198.47	166.956	233.726	104.283	206.459	48.2407	311.373	199.255	258.494	129.092	179.955	46.4738	122.699	201.333	180.323
Clec4e	34.0499	4.51779	0.891881	5.06546	4.07419e-07	3.78345e-06	29.1326	18.118	34.7625	45.7742	1.27019	54.7112	0	37.506	48.4644	46.9219	28.7357	63.7846	4.21507	50.2025	53.1523	28.0479
Timm17a	503.432	-0.943953	0.186355	-5.06534	4.07679e-07	3.78364e-06	449.415	369.398	411.827	483.073	1035.05	450.681	857.38	422.714	400.065	343.491	473.842	477.706	584.914	467.36	429.624	398.373
Hs3st1	87.7247	2.25663	0.445538	5.06495	4.08497e-07	3.789e-06	80.3617	115.411	104.441	125.612	35.5394	48.4208	18.9982	219.599	98.44	190.454	76.384	41.8602	30.7247	44.8031	82.5356	90.011
Spib	51.5053	4.05698	0.801515	5.06164	4.15657e-07	3.85314e-06	46.8796	126.495	97.1722	81.4239	0	6.32121	2.2871	124.679	36.9742	94.0146	60.1676	8.42233	16.9463	12.3108	47.4422	62.5486
Ciita	172.763	3.6683	0.724803	5.0611	4.1684e-07	3.86038e-06	8.89799	182.803	223.155	201.193	28.987	342.972	12.4805	153.501	214.957	403.112	189.307	100.276	5.3156	254.247	226.541	216.47
Col6a1	4982.8	1.91918	0.379206	5.06106	4.16928e-07	3.86038e-06	1382.33	6894.98	6300.29	7403.53	2424.03	4365.37	1385.14	10137.2	7264.83	6378.16	4489.48	3468.23	2359.8	5282.33	4966.73	5222.39
Gpr180	450.872	-1.13456	0.224386	-5.05631	4.27438e-07	3.95537e-06	379.277	371.502	374.354	346.316	724.675	364.654	841.186	368.079	273.935	274.116	517.044	364.336	677.739	461.985	369.056	505.695
Atp7b	59.7706	2.36897	0.468669	5.05468	4.31111e-07	3.98702e-06	126.149	56.6159	77.1154	96.1548	12.8336	31.4871	15.9495	88.9707	60.4685	77.0079	51.976	34.1847	18.1212	43.2868	84.2207	81.787
Shisa2	79.0567	2.17878	0.431138	5.05355	4.33675e-07	4.00838e-06	52.2757	99.4041	81.0645	108.842	28.987	87.714	7.48831	94.587	93.1223	91.5455	47.9182	67.6863	26.578	81.6483	163.11	132.936
4930415O20Rik	138.184	-2.17684	0.430874	-5.05216	4.36843e-07	4.03529e-06	64.5104	96.8769	102.014	65.1404	405.818	113.338	217.161	35.6728	86.9141	44.7325	155.586	92.7553	356.145	105.419	135.925	132.936
Etfa	1278.06	-1.09205	0.216232	-5.05033	4.41037e-07	4.07165e-06	1981.13	1011.38	1129.31	944.499	2147.94	1129.09	2093.83	809.429	1071.05	855.062	1102.93	1139.53	2077.86	972.543	970.873	1012.52
Cd164l2	55.9813	-1.99713	0.395521	-5.04935	4.43307e-07	4.0902e-06	49.3268	62.1375	40.4608	21.7392	125.132	53.8231	124.566	26.4642	31.6548	16.2451	78.8479	23.0935	108.156	62.274	34.9051	36.8746
Mmp7	233.475	6.3069	1.2493	5.04835	4.45644e-07	4.10936e-06	1394.76	83.3984	191.276	206.141	5.27037	63.0752	0	692.917	296.439	411.435	72.1731	125.345	7.97341	94.0506	42.8369	48.5036
Abi3bp	385.744	4.01051	0.794637	5.04697	4.48865e-07	4.13423e-06	36.9374	426.113	591.737	712.071	49.1687	224.078	34.9302	445.166	857.082	1694.53	96.5935	276.325	37.193	108.768	280.713	300.494
Afap1	287.1	1.20799	0.239347	5.04704	4.48704e-07	4.13423e-06	241.852	418.415	300.653	321.275	184.603	310.835	129.579	365.819	329.121	377.415	295.852	244.727	114.543	336.002	321.138	301.765
Ndnf	39.4299	5.65765	1.12106	5.0467	4.49514e-07	4.13778e-06	43.222	55.9105	71.7748	43.3174	2.29282	90.1123	0	42.7739	81.5345	28.9644	31.0781	32.6852	0	27.2651	32.76	47.1867
Deptor	3689.57	-1.52686	0.302593	-5.04592	4.51353e-07	4.15229e-06	4355.54	3031.88	2736.36	2651.1	6380.91	3333.25	6652.88	1010.47	2802.25	1897	3671.59	3388.45	6844.72	3302.28	3669.83	3304.57
Tlr6	49.0532	2.38235	0.472206	5.04515	4.53167e-07	4.16655e-06	26.694	52.2293	68.3128	76.6843	13.1759	40.4076	17.4727	66.4812	76.8259	87.9045	32.5371	52.6449	10.6312	57.8773	60.9601	44.0126
Epha4	252.891	2.52529	0.501602	5.03445	4.79234e-07	4.40365e-06	294.242	233.494	301.879	392.011	57.9282	100.829	52.7598	294.904	625.085	787.432	104.4	150.493	107.113	122.334	216.229	205.129
Lpin3	358.707	-1.49084	0.296152	-5.03403	4.80267e-07	4.41056e-06	210.536	326.815	324.516	221.964	688.505	273.154	711.455	175.453	264.194	172.964	332.55	244.793	673.387	327.313	407.695	384.023
Lrrc31	37.7269	3.53509	0.702357	5.03319	4.82395e-07	4.42495e-06	71.5867	44.0233	44.7431	50.9192	0	16.7247	4.88376	50.6305	54.5416	77.7564	24.9458	29.9077	7.81609	19.5008	53.9238	51.7263
Rnf5	538.285	-1.22095	0.242577	-5.03325	4.82231e-07	4.42495e-06	345.878	429.812	407.522	388.289	987.894	505.034	1085.25	500.124	401.137	268.165	605.747	367.152	895.231	527.79	400.046	497.482
Tomm6	521.606	-1.13578	0.225721	-5.03179	4.85932e-07	4.4548e-06	482.296	419.616	359.635	383.484	943.902	428.551	824.003	590.863	371.544	260.546	584.227	394.91	1047.73	481.077	351.032	422.289
Sptssb	51.6491	5.74145	1.14112	5.0314	4.86917e-07	4.46124e-06	34.2959	53.8295	111.918	99.1097	3.36774	5.0381	3.19	182.073	44.6285	138.179	36.3664	9.91934	0	11.8875	52.8993	39.6843
Atp13a2	1091.89	-1.43492	0.285227	-5.03079	4.88465e-07	4.47282e-06	1357.44	1005.44	799.003	721.143	1667.39	1176.21	1661.2	617.941	692.76	377.278	1631.78	694.235	2409.07	980.128	893.153	786.059
Tgm2	1779.12	0.889246	0.176777	5.03032	4.89656e-07	4.48112e-06	2243.07	2289.47	2136.74	2222.97	1286.11	1531.95	1015.29	2778.14	1729.15	1693.44	1972.26	1431.35	1290.97	1857.66	1409.78	1577.56
Gm8995	544.107	2.41726	0.480595	5.02972	4.91184e-07	4.49011e-06	93.4289	502.918	713.186	817.141	179.192	672.145	124.805	354.566	962.263	930.019	562.004	1010.28	95.6809	671.79	512.395	503.899
Ufm1	1850.14	-1.36423	0.271233	-5.02972	4.91208e-07	4.49011e-06	1115.29	1272.13	1735.97	1551.47	3843.92	1493.37	4297.24	816.074	1418.36	1056.48	1711.96	1723.55	2514.01	1811.57	1610.24	1630.61
Eno1	2429.72	1.03799	0.206505	5.02646	4.99607e-07	4.56424e-06	1754.53	2221.96	3315.68	2927.14	1274.65	1997.96	1842.78	3686.01	2552.67	2520.51	2220.43	3141.84	1444.55	3369.42	2282.43	2322.98
Cdc42se2	690.495	0.755046	0.150233	5.02582	5.01287e-07	4.57693e-06	687.153	629.766	819.684	894.13	533.093	761.455	453.976	788.14	726.066	905.06	628.932	694.881	447.195	714.24	656.767	707.378
Btnl9	67.2285	-2.49232	0.495971	-5.02513	5.03081e-07	4.59065e-06	16.6075	22.1971	28.0003	67.5688	150.445	43.2815	192.234	19.4639	26.2275	20.5585	59.4047	44.0373	228.772	50.5471	56.3169	49.9941
Rnase2a	31.8023	7.39695	1.47251	5.02336	5.07744e-07	4.63052e-06	36.7042	5.05445	60.1153	112.965	0	4.92775	0	78.9126	69.8417	3.12087	6.50741	87.7415	0	12.4023	9.88543	20.659
Wdr74	347.095	-1.04166	0.207382	-5.0229	5.0897e-07	4.63901e-06	359.256	254.407	284.181	300.141	732.581	277.925	519.189	286.464	259.966	204.417	378.022	303.335	494.351	324.526	259.492	315.274
Hpse	130.597	2.65092	0.527825	5.02236	5.10413e-07	4.64948e-06	29.5199	142.429	181.755	175.076	41.4457	143.38	12.211	146.64	172.397	199.406	110.418	327.746	26.1263	175.383	119.972	85.6448
Nptx2	75.5173	2.62969	0.523828	5.02014	5.16337e-07	4.70073e-06	74.5207	31.1691	60.1153	134.404	34.2574	32.5232	9.98441	147.015	239.79	83.7434	71.5816	31.7541	26.578	45.475	65.9029	119.463
Fgd6	474.698	1.71768	0.342263	5.01859	5.2051e-07	4.73598e-06	326.407	397.863	708.872	685.612	146.556	373.583	122.087	728.51	540.87	928.147	420.945	384.357	359.345	485.714	601.888	384.41
Epdr1	144.609	2.26661	0.451663	5.01836	5.21155e-07	4.73911e-06	32.2552	174.378	173.97	208.614	47.4333	118.266	24.961	198.903	204.869	255.911	108.851	198.045	50.4982	172.598	186.999	157.188
Sparcl1	2979.76	1.20173	0.239486	5.01796	5.22234e-07	4.74619e-06	3201.05	3207.05	3280.84	4633.22	1936.86	2549.62	1727.3	4810.97	3980.2	4384.82	1722.1	2689.07	1783.39	2245.84	2746.5	2777.28
Klb	380.864	-2.17583	0.433664	-5.01731	5.23995e-07	4.75733e-06	241.358	358.866	222.244	202.842	598.186	361.697	1068.33	49.7257	265.398	143.56	390.445	294.143	837.208	372.068	341.047	346.711
Rgs18	38.4104	4.0132	0.799875	5.01729	5.24064e-07	4.75733e-06	14.4592	19.3754	51.0069	79.158	5.27037	60.1186	2.4961	40.5373	53.5453	71.78	25.4381	57.6587	2.6578	34.1063	50.2509	46.7072
Mpc2	393.902	-0.842025	0.167832	-5.01706	5.24674e-07	4.75978e-06	407.123	272.476	326.148	328.07	707.308	332.298	544.871	386.898	348.347	348.218	293.385	375.624	618.749	323.204	345.465	344.245
Trp53	556.9	1.29396	0.257916	5.01697	5.24938e-07	4.75978e-06	272.896	576.155	657.811	632.201	318.773	554.93	285.827	891.252	683.929	649.118	640.953	599.041	272.977	684.287	534.465	655.783
Cfl1	4200.32	1.04108	0.207542	5.01623	5.26954e-07	4.77531e-06	2285.67	3647.63	4758.22	5313.48	3204.38	4334.45	2685.81	7693.44	5181.48	4990.27	3402.79	4917.7	2474.41	4478.25	3923.69	3913.52
Svil	1771.08	1.03671	0.206746	5.01443	5.31911e-07	4.81746e-06	1143.56	2203.33	1803.96	1877.62	700.872	1727.36	952.432	1777.3	2080.94	2494.19	1630.54	1706.67	1107.06	1759.77	2648.41	2723.33
Cpq	77.6644	4.30915	0.85943	5.01396	5.33199e-07	4.82636e-06	94.5411	36.2235	96.5488	122.86	0	63.0752	17.4727	218.361	33.3688	131.077	123.049	17.5483	0	87.8494	105.445	95.2108
Fam78a	60.3021	2.12811	0.42446	5.01368	5.33982e-07	4.83066e-06	23.8194	48.9685	112.543	88.6004	26.9261	55.5832	25.6712	98.0135	78.6399	69.47	35.3352	94.6715	13.7083	95.8291	50.7162	46.3389
Trpt1	57.1288	-1.9113	0.38141	-5.01114	5.41082e-07	4.89209e-06	63.3982	54.7565	31.8793	22.2632	108.042	67.0174	102.34	34.0513	38.8009	16.1245	72.7647	29.2472	148.837	45.475	39.5417	39.5215
Lyrm4	130.126	-1.01546	0.202658	-5.01069	5.4235e-07	4.90074e-06	126.796	96.8769	105.657	124.509	234.531	86.7284	219.657	96.749	122.611	91.5455	101.752	111.975	225.913	125.056	112.859	98.8037
Specc1	85.3228	2.61592	0.52252	5.00635	5.54708e-07	5.00954e-06	89.2465	54.498	112.453	90.6674	21.7493	64.4358	29.6721	170.425	111.71	211.573	45.1244	106.964	7.89857	90.0957	95.4783	63.1747
Trmt2b	427.581	-0.755951	0.151018	-5.00571	5.56566e-07	5.02344e-06	385.788	397.387	359.918	299.409	501.946	379.067	603.949	328.064	404.71	473.149	370.553	443.343	657.382	374.136	425.5	436.997
1700019D03Rik	367.47	-2.09092	0.417721	-5.00555	5.57033e-07	5.02478e-06	736.244	345.362	185.948	139.045	554.929	395.919	866.022	76.9791	235.578	95.2658	395.539	269.209	612.858	383.625	270.085	316.903
Tspan7	391.759	0.821028	0.164046	5.00486	5.59024e-07	5.03985e-06	250.95	360.793	511.997	473.419	290.915	334.386	295.813	577.406	457.338	503.933	328.081	337.163	271.473	334.679	496.669	443.133
Ddx55	258.271	-1.0756	0.214972	-5.00343	5.63197e-07	5.07167e-06	266.299	264.204	174.963	170.173	237.978	261.059	450.917	170.421	216.368	190.168	269.591	249.821	468.597	274.327	236.493	230.962
Epn1	1066.41	-0.929068	0.185685	-5.00347	5.63087e-07	5.07167e-06	1301.52	1115.07	980.947	757.49	1405.3	1153.43	1842.76	844.293	726.639	599.018	1333.23	816.53	1479.84	1028.73	822.346	855.408
Nxpe5	75.3478	5.16874	1.03307	5.00326	5.63691e-07	5.07322e-06	4.1122	123.174	72.2163	83.5938	6.49519	104.458	1.91967	137.847	73.6718	156.296	77.8971	80.9935	0	100.678	91.4451	90.767
Mrpl30	648.134	-1.0797	0.215953	-4.99972	5.74141e-07	5.16432e-06	983.501	509.478	495.975	475.517	1227.65	598.622	867.199	515.096	459.931	435.024	598.984	627.342	993.078	543.964	474.379	564.412
Srprb	901.145	-1.477	0.295606	-4.99651	5.83783e-07	5.24805e-06	782.959	654.209	765.376	654.915	1663.59	785.995	2122.35	530.567	533.422	381.506	1175.21	572.291	1399.01	850.53	616.848	929.541
Slc7a6	505.32	-1.21362	0.242927	-4.99582	5.8586e-07	5.26372e-06	450.461	276.31	286.003	458.457	990.829	414.917	848.675	388.077	445.435	444.724	584.484	474.64	906.31	342.096	383.884	389.825
Smim13	597.967	-0.841994	0.168555	-4.99536	5.87247e-07	5.27318e-06	536.104	434.683	521.91	502.983	938.125	554.865	843.683	383.213	603.743	525.347	576.794	564.888	919.599	522.963	610.425	528.151
Itgb6	157.494	1.98647	0.397793	4.99373	5.9225e-07	5.31507e-06	213.862	149.884	204.261	223.448	43.5724	137.399	49.9617	356.987	198.769	290.68	102.831	98.7119	93.371	83.6469	136.216	136.305
Slc39a5	1380.33	-3.45759	0.692497	-4.99293	5.94701e-07	5.33403e-06	1081.05	1011.29	639.211	351.798	3509.53	1237.55	3241.26	158.47	371.856	78.3403	1976.35	277.724	5779.64	1044.34	536.754	790.049
Nars	3249.58	-1.22539	0.245432	-4.9928	5.95101e-07	5.33458e-06	2039.86	2440.46	2930.16	3072.32	5647.2	2682.67	7148.84	1683.11	2243.47	2183.57	3601.56	3234.74	4611.29	3016.85	2678.13	2779.08
Cd82	939.342	-1.02962	0.206244	-4.99225	5.96793e-07	5.34671e-06	1402.57	1004.34	667.417	673.063	1208.87	978.476	1380.82	699.999	608.804	501.876	1026.82	727.182	1466.94	1151.01	726.735	804.55
Reep6	195.576	-1.4454	0.289736	-4.98867	6.07958e-07	5.44365e-06	345.09	186.534	133.504	91.5557	308.485	127.014	276.121	132.826	119.085	83.405	228.536	234.454	390.137	218.258	121.687	132.523
Egr1	436.846	2.52957	0.507138	4.98794	6.10258e-07	5.46113e-06	1373.82	706.672	349.973	317.652	60.9633	662.194	70.2991	982.384	346.565	423.256	282.644	330.322	128.32	376.321	300.781	277.363
Gal3st2	117.792	5.24068	1.05087	4.98699	6.13273e-07	5.485e-06	64.9144	175.547	171.035	190.415	17.4233	21.5222	16.5038	258.212	171.594	436.325	57.5527	67.3457	1.11616	108.898	44.8775	81.3869
Itpka	39.8795	-3.17108	0.635894	-4.9868	6.13877e-07	5.48729e-06	126.796	30.3267	14.5734	4.12281	52.7037	45.3353	74.8831	11.3504	11.6403	4.68131	34.3118	22.5621	154.153	19.6369	14.8281	16.1679
Snf8	443.346	-0.869158	0.174312	-4.98621	6.15748e-07	5.50089e-06	319.383	338.736	383.076	325.418	730.035	348.968	742.144	540.393	373.942	351.013	369.474	404.425	756.499	406.884	359.448	343.702
Letm1	550.096	-0.885776	0.177662	-4.98574	6.17257e-07	5.51125e-06	640.956	460.091	430.657	478.271	813.793	557.972	865.016	512.341	418.257	381.612	566.016	426.174	871.904	489.614	362.71	526.146
Arhgdig	3415.51	-1.92638	0.386425	-4.98513	6.19209e-07	5.52555e-06	6441.49	2230.09	1878.19	1981.35	6402.46	3196.06	6687.97	1549.11	1916.93	647.202	3812.29	2133.38	7793.1	3411.07	1843.46	2723.95
Lims1	1152.64	1.00714	0.202036	4.98495	6.19789e-07	5.52759e-06	863.151	1180.77	1455.78	1497.77	610.902	1221.26	841.066	1003.25	1356.12	1682.57	1079.75	1289.11	531.977	1256.72	1264.33	1307.73
Tspan13	1222.09	-1.42519	0.285915	-4.98468	6.2064e-07	5.53205e-06	580.594	1044.59	885.334	1007.62	2084.43	1089.03	2595.95	564.279	907.942	749.009	1314.5	868.223	2094.35	1189.58	1300.76	1277.26
Lyl1	73.169	2.87514	0.576871	4.98402	6.22777e-07	5.54796e-06	23.3572	89.2952	80.1537	92.351	10.5407	148.818	7.48831	162.69	97.7784	52.5347	97.0196	61.8369	26.578	89.9165	58.4888	71.8572
H13	3118.35	-0.9745	0.195569	-4.98291	6.26354e-07	5.57668e-06	3385.05	2649.93	2817.69	2388.92	4444.46	3244.32	5086.34	2233.14	2210.12	1724.34	3405.7	2701.08	4687.65	2958.53	2780.39	3175.89
Larp1	5830.21	-1.49485	0.300097	-4.98121	6.31885e-07	5.62274e-06	5650.19	5841.46	4565.02	4084.38	9495.92	5903.82	11606.1	1820.62	3694.75	2635.11	7375.9	4861.26	8833.93	5856.17	5082.19	5976.48
1810041L15Rik	281.053	-2.50005	0.502245	-4.97775	6.43281e-07	5.71827e-06	122.74	297.523	118.705	86.8959	285.83	304.677	1074.63	67.2926	208.523	82.9108	305.485	141.081	679.639	243.879	223.697	253.339
C5ar2	38.9907	2.61227	0.524792	4.97772	6.43361e-07	5.71827e-06	23.4316	31.2684	45.5371	46.3226	2.64358	52.0826	12.5203	65.8284	52.9176	55.5179	28.4865	51.0026	10.6651	54.9512	51.0282	39.6474
Rgl1	569.702	1.53878	0.30914	4.97762	6.43709e-07	5.71827e-06	365.039	783.553	804.842	863.625	169.646	473.626	270.866	713.738	733.839	762.494	495.227	453.397	370.817	769.053	587.445	498.019
Kdelr3	682.821	-1.10582	0.222201	-4.97669	6.46804e-07	5.73929e-06	461.583	572.837	538.305	586.264	1096.24	585.417	1417.79	550.226	457.851	414.036	686.236	564.888	927.573	690.393	652.438	723.063
Ptprn2	1144.62	-1.95002	0.391827	-4.97674	6.46634e-07	5.73929e-06	889.816	942.6	910.845	808.312	2069.07	1082.34	2793.14	299.685	507.314	299.721	1280.56	851.317	2453.53	1074.68	953.418	1097.61
Il7r	56.0941	7.3859	1.48418	4.97643	6.4767e-07	5.74374e-06	72.2962	61.4958	91.0838	91.5264	0	58.1475	0	39.9968	97.0023	149.802	0	66.015	0	77.5142	68.3742	24.2518
Syt8	27.4034	6.64989	1.33662	4.97517	6.51895e-07	5.77796e-06	38.8076	30.3094	30.1823	38.165	0	16.7067	0	109.579	12.9925	48.5356	36.5707	16.1535	0	22.619	17.0232	20.8093
Mccc2	405.904	-1.3622	0.273934	-4.97272	6.60208e-07	5.84835e-06	358.144	470.064	302.398	284.474	548.118	406.047	773.792	175.121	325.152	208.058	433.63	273.252	770.763	425.811	353.404	386.233
Cass4	54.3745	3.30101	0.66394	4.97185	6.63175e-07	5.87134e-06	11.6213	42.9678	56.949	80.0223	5.00612	149.268	11.7169	50.0936	69.7797	76.6859	25.7438	53.4162	2.52455	108.716	70.134	55.3473
Lrrk2	182.933	2.18707	0.439971	4.97094	6.66274e-07	5.89546e-06	113.832	124.172	171.146	331.204	48.1779	89.6707	107.371	222.375	434.523	459.932	85.7597	163.688	44.7523	150.116	202.06	178.149
Hbegf	196.452	2.24155	0.450975	4.97047	6.67921e-07	5.90672e-06	313.654	172.694	190.365	237.474	76.4203	245.402	49.922	441.586	210.301	345.897	140.205	256.539	45.1826	161.23	125.215	131.139
Spry2	172.958	1.52775	0.307382	4.97019	6.68862e-07	5.91172e-06	180.184	229.977	153.021	150.895	68.5147	244.416	52.4181	264.844	239.79	226.263	157.953	192.196	90.3653	181.9	154.048	180.541
Gkn2	38.6403	7.82741	1.57511	4.96944	6.71466e-07	5.93141e-06	78.9697	61.4958	51.9177	289.421	0	1.9711	0	81.6151	10.8643	1.04029	30.1707	0	0	0	0	10.7786
Arap1	1011.86	1.17483	0.236429	4.96906	6.72791e-07	5.93952e-06	776.77	1192.72	1099.52	1211.03	582.85	1468.66	461.429	1667.34	1273.45	707.046	1121.61	899.441	703.466	1266.94	806.462	951.016
Clec4a1	196.526	1.93096	0.388613	4.96885	6.73515e-07	5.93952e-06	77.8574	205.548	206.76	220.158	71.1499	213.864	37.4415	185.391	249.102	403.112	140.797	378.542	61.1294	293.52	215.008	185.032
Tollip	1296.84	-0.863594	0.1738	-4.9689	6.73325e-07	5.93952e-06	1384.3	1102.5	1174.77	1231.55	2237.77	1198.3	1790.5	824.013	1066.79	890.505	1465.04	1106.99	1832.14	1185.35	1100.35	1158.49
Gpr171	45.4002	6.20105	1.24803	4.96867	6.74144e-07	5.94174e-06	18.9082	22.745	48.2744	65.1404	0	44.3498	2.4961	107.018	51.9933	115.472	23.0717	65.1794	0	66.1455	45.3082	50.3001
Slc25a30	249.687	1.46569	0.295056	4.96751	6.7819e-07	5.97406e-06	234.684	205.548	308.774	362.807	202.909	234.561	72.387	329.703	362.401	381.787	178.067	276.595	95.6809	279.051	245.488	224.554
Lrp5	1040.32	1.10233	0.22197	4.9661	6.83121e-07	6.01413e-06	1743.7	1422.61	1031.66	1153.13	556.088	1062.94	485.844	1627.82	1095	811.337	1359.2	667.881	674.303	986.831	893.048	1073.77
Nags	7.62372	-4.07484	0.820976	-4.96341	6.92651e-07	6.09463e-06	14.0467	5.31942	0.958587	0.867789	28.8101	2.56894	28.8965	1.7065	2.4501	1.09483	5.60337	2.90422	19.5799	5.43852	1.73394	0
Mocos	70.0778	2.24406	0.452148	4.96311	6.93741e-07	6.10081e-06	117.898	64.8654	92.9054	64.3159	18.4463	64.0608	12.4805	122.693	114.075	96.747	75.1311	83.5633	31.8936	57.8773	48.6034	55.6894
Dna2	105.333	1.93729	0.390529	4.96068	7.02465e-07	6.17409e-06	39.3948	78.1797	119.112	121.442	38.7022	182.42	27.9007	142.909	134.546	197.442	84.3277	98.3219	35.9284	139.33	139.731	105.645
Mdh1	2467.27	-0.989937	0.19967	-4.95787	7.12699e-07	6.26018e-06	2755.08	2071.27	2124.73	2261.91	3326.36	2324.57	4854.03	1421.02	1913.3	1708.91	2323.43	2251.21	3317.39	2320.74	2349.95	2152.39
Txndc11	1078.99	-1.32007	0.266263	-4.95777	7.13054e-07	6.26018e-06	1098.77	978.823	870.299	958.879	1687.99	990.64	2318.07	467.433	680.294	551.155	1195.22	891.008	1564.18	974.424	953.456	1083.26
Dact3	45.6038	3.51071	0.708447	4.9555	7.21441e-07	6.33028e-06	33.3675	44.6476	49.1852	45.3509	7.90555	29.5665	4.9922	150.258	69.8417	104.549	36.6782	43.4529	7.97341	32.0392	32.1276	37.725
Grip2	3239.66	-3.40556	0.687244	-4.95539	7.21861e-07	6.33044e-06	1835.97	698.977	825.784	1190.44	18671.9	1480.01	9495.83	885.738	1364.75	333.348	1146.86	538.044	5742.4	2279.51	3658.55	1686.52
Fam171a2	58.1163	2.77267	0.559706	4.9538	7.27781e-07	6.37881e-06	68.7385	76.8972	61.1783	66.9049	26.7273	59.9756	3.10496	143.879	77.1074	55.3935	84.1441	24.3433	13.4783	20.965	78.6963	68.3281
Yars	1279.63	-1.54425	0.31178	-4.95301	7.30738e-07	6.40117e-06	576.902	1018.19	1111.81	1124.77	3138.44	1031.62	2522.89	636.422	685.313	597.674	1426.83	1110.97	2119.2	1260.88	1008.54	1103.59
Emc9	79.8844	-1.82027	0.367717	-4.95018	7.41434e-07	6.48988e-06	50.0273	53.2472	58.913	43.4583	171.422	93.3396	148.969	56.8126	51.6851	33.2926	90.4008	46.6303	239.464	50.1292	27.2555	63.1026
Hid1	1875.75	-1.86964	0.377696	-4.95012	7.41689e-07	6.48988e-06	1964.89	1564.57	1394.48	1198.79	3724.03	1742.07	4391.93	630.313	942.086	503.184	2400.48	977.915	3296.65	1920.3	1415.27	1944.98
Rab26	403.114	-2.40383	0.485686	-4.94935	7.44599e-07	6.51173e-06	190.068	425.676	268.671	167.891	868.243	477.959	1015.44	83.3046	202.063	73.1726	471.763	201.303	977.645	313.863	352.411	360.357
Rnf185	795.301	-1.18718	0.239882	-4.94902	7.45874e-07	6.51926e-06	678.809	702.158	668.334	628.015	1710.58	748.666	1222.68	404.666	573.272	518.892	906.329	712.987	947.307	729.555	737.325	835.242
Phf5a	330.537	-0.882778	0.178401	-4.94828	7.48714e-07	6.54045e-06	368.867	218.246	270.358	304.34	545.858	306.008	528.694	299.921	264.195	221.236	273.144	344.913	500.531	331.458	242.737	268.081
Serpina5	26.8972	6.50577	1.3148	4.94809	7.49435e-07	6.54313e-06	3.33675	25.2722	49.1852	75.0352	0	35.4798	0	18.9174	31.0408	23.4065	28.396	40.946	0	53.7432	22.2422	23.3536
Lpar2	99.7684	1.7313	0.349945	4.94735	7.52305e-07	6.56455e-06	142.429	106.53	107.87	83.7518	34.3821	93.9681	27.5571	149.72	119.163	163.398	90.8424	121.61	42.6796	82.9828	114.923	114.489
Plekhs1	73.4865	2.05259	0.414938	4.94674	7.54657e-07	6.58143e-06	57.8369	102.774	124.785	109.667	23.7166	35.4798	32.4493	108.64	115.627	134.718	53.2425	57.6587	26.578	59.9443	62.6077	70.0608
Sucla2	830.334	-0.644254	0.130281	-4.94513	7.60949e-07	6.63263e-06	823.296	708.215	788.581	729.49	1187.56	806.288	1175.39	642.416	727.248	822.434	682.106	859.311	1017.66	879.301	769.041	667.022
Aifm1	512.641	-0.784891	0.158754	-4.94409	7.65018e-07	6.66441e-06	399.311	387.869	391.664	464.948	764.334	481.762	951.824	462.639	473.778	505.355	437.971	488.141	598.387	505.773	457.827	430.677
Tnfrsf12a	224.696	2.27367	0.459974	4.94303	7.69181e-07	6.69697e-06	428.63	194.217	170.965	225.367	22.9677	337.732	76.6986	542.702	274.099	212.997	307.995	189.125	89.2097	198.11	142.526	181.79
Gpr137b-ps	150.942	-2.70617	0.547559	-4.94225	7.72262e-07	6.72008e-06	50.0512	80.8712	95.638	80.8071	455.887	94.6128	419.345	18.3769	49.6652	37.4504	163.277	88.5771	316.278	106.453	145.81	211.979
Eci1	331.82	-0.953394	0.192942	-4.94135	7.75839e-07	6.74749e-06	259.154	276.31	291.468	262.211	558.659	296.651	471.763	271.87	275.487	203.377	391.036	283.28	568.77	338.995	252.902	307.19
Ifngr2	585.944	1.00582	0.203571	4.94087	7.77764e-07	6.7605e-06	455.619	598.442	754.842	645.451	318.23	656.006	438.813	912.664	658.463	772.417	473.183	637.761	354.789	649.836	527.336	521.244
Abcb10	291.852	-0.817413	0.165474	-4.93981	7.81968e-07	6.79182e-06	279.174	244.298	237.729	259.737	363.655	281.867	499.22	274.032	230.478	250.71	260.888	208.908	462.458	278.018	263.611	274.854
Rap1gap2	2838.03	-1.56943	0.317714	-4.93975	7.8223e-07	6.79182e-06	2874.2	3283.92	1549.84	1440.84	2795.44	3110.97	5019.03	962.521	1967.75	1352.52	2944.36	2526.24	5363.21	3638.66	3201.59	3377.43
Mn1	64.8668	1.8931	0.383405	4.93761	7.90864e-07	6.86301e-06	54.5002	85.0832	78.332	110.491	39.5277	31.5376	19.9688	118.369	90.7942	86.8642	69.8068	36.7679	21.2624	59.9443	70.8456	63.7733
Ier5	189.052	1.56323	0.31666	4.9366	7.94945e-07	6.89463e-06	175.735	214.814	242.283	206.141	92.2314	193.168	79.8753	311.867	199.437	349.017	198.18	207.237	71.7607	146.76	184.528	151.798
Csdc2	52.5973	3.22354	0.653009	4.93644	7.95614e-07	6.89664e-06	48.2636	83.3883	43.5597	54.2951	13.9935	46.0358	7.95296	147.835	88.2394	67.4155	19.8945	64.1377	5.76368	62.0331	43.8657	44.8832
Gbas	1082.03	-1.10619	0.224129	-4.9355	7.99454e-07	6.92611e-06	1691.9	975.91	853.369	820.477	1593.64	1057.19	1893.61	595.535	818.531	621.16	1132.21	874.567	1495.03	987.256	941.632	960.506
Ccl22	34.9343	4.22802	0.856907	4.93405	8.05417e-07	6.97393e-06	8.68269	52.6096	54.7821	64.3689	6.42536	44.8573	0	50.08	54.5214	33.8205	46.1816	25.8086	2.16017	37.8006	20.7559	56.0948
Ctso	410.987	1.30881	0.265273	4.93382	8.06361e-07	6.97827e-06	342.218	436.969	483.161	616.352	240.341	337.553	132.188	454.488	535.079	632.801	351.511	542.767	260.65	361.666	446.365	401.681
C2cd4c	67.3753	-2.63735	0.534768	-4.93176	8.14904e-07	7.04462e-06	40.7886	25.597	18.1327	32.8289	328.569	43.3707	183.075	42.9939	36.5892	24.5248	20.4549	11.3822	100.252	38.9844	87.1774	43.2845
Mrpl18	371.005	-1.1448	0.232129	-4.93176	8.14922e-07	7.04462e-06	267.121	283.57	252.365	253.83	509.016	286.289	550.762	318.479	347.578	274.673	346.828	448.31	900.195	329.399	294.988	272.677
Calu	4759.5	1.00556	0.203961	4.93014	8.21686e-07	7.09921e-06	2554.67	4430.67	5532.89	6089.32	3005.04	4773.93	3081.14	5219.37	5745.95	7433.51	4125.28	6037.6	2350.64	4982.4	5737.75	5051.87
Bmpr1b	100.546	-2.66615	0.541055	-4.92768	8.32099e-07	7.18523e-06	108.336	45.4545	68.0942	39.5481	221.233	119.412	263.826	14.4417	26.0068	16.0908	65.5757	65.0718	212.401	239.792	54.9849	48.4658
Snx20	53.9808	2.9257	0.593807	4.92702	8.34921e-07	7.20565e-06	12.2347	55.5989	67.402	65.965	13.1759	85.7429	9.98441	103.775	77.6019	80.1023	49.693	44.2886	7.97341	85.7824	57.665	46.7072
Abcb1b	68.2093	4.3985	0.892849	4.92637	8.37717e-07	7.22582e-06	109	51.3869	59.2044	74.2106	0	43.3642	0	148.637	159.86	162.805	57.9752	74.3714	15.9468	60.9778	60.1364	13.4732
Lage3	283.068	-0.956859	0.194391	-4.92235	8.55126e-07	7.3715e-06	220.046	250.724	235.992	214.422	521.984	289.681	454.032	275.513	246.454	156.834	229.516	225.605	441.665	280.893	224.597	261.134
Msrb3	379.732	1.55943	0.316813	4.92225	8.55542e-07	7.3715e-06	246.912	373.773	435.829	672.191	187.892	270.721	132.707	718.395	448.808	760.119	246.339	289.099	263.274	259.285	403.537	366.837
Ccl2	61.0281	3.44119	0.699155	4.92193	8.56934e-07	7.37947e-06	10.1674	64.382	64.7596	58.6255	0	77.9166	15.2117	101.146	76.8795	87.8349	67.3005	90.1238	5.39905	113.379	73.4284	69.8955
Znhit3	89.1435	-1.25568	0.25526	-4.91921	8.68952e-07	7.47887e-06	74.6072	85.1489	71.5275	67.1965	144.318	50.8282	154.313	54.3114	68.7769	60.2384	97.2397	73.5862	168.161	83.3348	75.3669	97.3412
Adamts3	39.0281	3.1884	0.648262	4.91839	8.72599e-07	7.50616e-06	21.1307	32.8504	51.9242	50.3046	2.63551	39.4181	7.48924	54.597	95.4434	94.158	22.483	28.4151	10.6302	31.0023	46.943	35.0254
Gys1	403.782	-0.9492	0.192998	-4.91818	8.73542e-07	7.51017e-06	387.063	406.041	333.367	293.544	519.131	382.394	696.413	327.001	344.552	202.857	477.999	355.98	664.45	439.247	289.149	341.322
Clec5a	73.4846	3.70123	0.752755	4.91691	8.79228e-07	7.55494e-06	6.09252	49.4246	82.0745	129.804	23.1801	64.3166	9.11521	166.22	121.981	190.72	31.1539	134.315	2.42643	66.6125	60.1327	38.1855
2020-09-06	167.005	1.18945	0.241961	4.91588	8.83841e-07	7.59043e-06	153.196	191.991	174.936	182.627	88.4626	202.156	62.7111	198.101	172.436	264.337	165.093	201.633	88.4132	184.384	169.126	172.481
Mmadhc	810.474	-0.923991	0.187969	-4.91565	8.84873e-07	7.59516e-06	669.468	601.943	705.743	818.702	1521.88	666.646	1280.07	513.518	674.552	655.404	723.291	877.892	1052.7	696.134	755.84	753.81
Irak4	244.542	0.954562	0.194239	4.91438	8.90659e-07	7.63109e-06	180.907	267.224	312.538	280.769	149.93	272.64	177.87	338.763	280.384	273.288	257.143	263.882	142.133	241.212	231.306	242.686
Micall2	92.2427	1.87774	0.38209	4.91439	8.90596e-07	7.63109e-06	122.729	120.922	103.173	103.063	15.4394	102.012	51.1857	194.438	143.606	92.4407	91.2726	61.8357	44.1203	91.4707	62.7446	75.4304
Tex30	255.373	-1.36342	0.277425	-4.91457	8.89795e-07	7.63109e-06	247.708	150.059	176.525	195.186	594.597	195.369	333.553	116.587	211.655	190.977	231.337	260.656	423.349	285.803	264.952	207.648
Vwa5a	1140.83	1.0971	0.223246	4.9143	8.90996e-07	7.63109e-06	942.757	1149.64	1148.86	1426.4	670.139	1240.8	613.922	1062.1	1323.61	1954.83	947.415	1613.54	456.152	1001.34	1513.37	1188.47
Plekhg1	313.817	1.46101	0.297354	4.91336	8.95305e-07	7.66383e-06	309.402	386.55	284.8	454.053	132.941	269.728	107.036	381.394	410.618	649.496	214.322	236.076	181.959	274.508	372.96	355.224
Wfdc1	66.2217	2.48891	0.506682	4.91217	9.00721e-07	7.70601e-06	45.6022	124.676	88.3513	103.07	15.8111	30.5521	19.9688	109.18	86.9141	73.3405	82.8216	15.0414	15.9468	57.8773	89.7926	100.6
Slfn1	59.4048	4.29159	0.873897	4.91087	9.06743e-07	7.75332e-06	11.1225	42.1204	69.2237	59.3685	2.63518	61.1041	4.9922	77.2911	64.4096	112.871	62.1162	176.319	2.6578	95.0841	54.3699	54.7911
Serpinb9b	40.2301	6.58904	1.3418	4.91061	9.07923e-07	7.7592e-06	11.1225	49.7021	30.9685	49.4737	0	22.6677	0	53.5092	49.6652	200.256	30.1707	30.0828	0	46.5085	35.4228	34.1322
Vps25	802.393	-0.711353	0.1449	-4.90927	9.14179e-07	7.80842e-06	863.092	694.14	757.904	629.764	1135.55	778.066	1208.67	731.055	637.104	553.092	827.378	769.043	1039.6	772.364	685.081	756.392
Vldlr	662.762	-1.82783	0.372334	-4.90912	9.1488e-07	7.81018e-06	1249.85	581.003	424.581	405.04	884.856	464.81	1413.21	155.927	441.706	328.25	507.672	672.048	1498.2	565.657	466.481	544.905
Grhpr	360.102	-1.67897	0.342045	-4.90864	9.1711e-07	7.82498e-06	475.16	347.582	204.798	185.399	587.357	387.971	693.828	253.096	218.485	79.0089	517.087	197.65	789.784	323.539	240.973	259.914
Cd302	433.506	1.05503	0.215069	4.90551	9.3183e-07	7.94576e-06	374.945	399.511	544.285	704.836	288.25	395.826	284.791	521.806	559.078	683.495	361.165	387.794	267.622	355.6	442.888	364.206
Ndufs2	1519.82	-0.977873	0.199345	-4.90542	9.32274e-07	7.94576e-06	1796.09	1105.69	1339.28	1209.94	2499.06	1324.93	2959.64	1604.19	1077.75	1114.05	1140.65	1264.93	2269.53	1115.8	1181.71	1313.82
Gif	626.138	4.11031	0.838702	4.9008	9.54464e-07	8.13049e-06	502.736	1600.58	1008.3	1050.49	76.4203	474.05	9.98441	94.587	200.989	491.537	1958.73	441.214	15.9468	580.84	813.9	697.913
Heph	180.932	2.12238	0.433224	4.89904	9.6307e-07	8.19936e-06	85.3643	210.104	218.902	293.462	73.2289	129.655	22.2956	189.473	263.536	470.455	110.379	198.589	71.2197	118.985	241.401	197.863
Paf1	586.266	-0.854547	0.174458	-4.8983	9.66684e-07	8.22569e-06	544.409	453.914	480.716	440.041	961.044	420.121	914.277	659.392	453.951	487.036	530.519	538.019	884.606	509.82	513.401	588.984
Sec16a	2769.99	-1.12117	0.228971	-4.89656	9.75313e-07	8.29464e-06	3072.19	2426.01	2321.26	2487.71	5339.33	2345.73	4799.17	1558.46	1878.04	1768.3	3204.82	2202.69	3312.87	2074.19	2474.84	3054.2
Tmem37	86.0352	1.59547	0.325953	4.89478	9.84143e-07	8.36522e-06	81.1942	65.7078	102.925	141.825	44.7981	85.7429	57.4104	198.903	117.179	76.9815	86.3711	74.3714	37.2092	85.7824	51.8985	68.2644
Prelp	1430.03	1.74652	0.356975	4.89255	9.95389e-07	8.45625e-06	560.86	1739.79	1820.75	2110.68	580.005	1318.28	481.627	1962.12	2129.39	3359.38	1095.9	1127.85	733.592	1187.53	1380.24	1292.44
Swi5	1317.2	-0.607325	0.124154	-4.89172	9.99588e-07	8.48734e-06	1163.07	1042.5	1143.36	1198.55	1877.08	1106.98	1962.77	1478.72	1134.28	1140.94	1089.22	1243.98	1826.25	1174.84	1176.42	1316.16
Cfap43	120.214	1.69226	0.346001	4.89091	1.00372e-06	8.51782e-06	142.302	115.729	135.224	177.862	34.1679	142.783	74.7535	211.626	143.4	162.729	91.159	96.998	49.2302	149.915	105.344	90.2008
Ednrb	380.302	1.18305	0.241913	4.89039	1.00638e-06	8.53579e-06	263.99	437.447	491.795	512.847	183.548	393.503	165.686	415.217	542.571	448.334	303.993	442.25	299.378	488.884	369.163	326.233
Rgs16	43.1582	3.61179	0.738591	4.89011	1.00779e-06	8.54316e-06	48.9389	39.5932	51.0069	41.2281	7.90555	45.3353	2.4961	108.099	52.7693	104.029	21.297	36.7679	5.3156	34.1063	49.4271	42.2161
Alb	250.466	2.26738	0.463751	4.8892	1.01244e-06	8.57798e-06	94.5411	252.722	336.099	490.615	81.6907	241.46	19.9688	195.12	259.19	220.542	169.193	301.664	98.3387	356.565	411.893	477.851
Gm20518	15.7117	-2.74796	0.562246	-4.88747	1.0214e-06	8.64922e-06	24.4695	14.3209	3.64335	1.64912	42.1629	7.8844	32.4493	4.86448	12.4163	10.923	20.7054	8.35633	39.867	7.23466	12.3568	8.08394
Bend5	39.9205	2.89328	0.592031	4.88704	1.02362e-06	8.66339e-06	30.1456	42.8867	57.3745	41.1236	6.56742	40.6171	0	71.7022	76.5073	69.7445	25.3283	45.4938	19.3297	25.0554	45.9328	40.9185
Atg3	805.141	-0.870499	0.178132	-4.88682	1.02476e-06	8.66835e-06	736.047	627.486	733.322	773.194	1436.3	725.469	1160.94	476.757	707.014	679.518	778.05	812.102	1087.17	760.793	724.244	663.851
Socs7	732.309	-1.07525	0.220086	-4.88557	1.03128e-06	8.71887e-06	808.117	549.39	601.516	693.437	1273.3	701.111	1170.79	359.187	626.936	454.269	839.011	682.33	1155.98	672.066	556.517	572.995
Chst14	108.996	1.50956	0.308998	4.88534	1.0325e-06	8.72448e-06	72.9897	138.204	132.62	154.723	38.4086	122.277	46.0696	174.576	124.418	136.535	97.1468	107.961	70.8558	116.494	114.877	95.7841
Zc3hav1l	230.275	1.34965	0.276309	4.88455	1.03668e-06	8.7551e-06	111.225	254.407	296.933	307.562	115.948	229.633	114.821	199.984	315.84	342.255	198.18	249.019	98.3387	240.811	313.039	296.411
Eda	192.93	-1.81104	0.370837	-4.88364	1.04143e-06	8.79052e-06	347.857	146.734	108.397	140.022	462.444	129.741	411.189	68.5419	148.944	69.3493	131.211	172.252	350.19	129.303	134.659	136.049
Pycr2	532.723	-1.67768	0.34384	-4.87926	1.06485e-06	8.98343e-06	426.896	408.462	351.161	309.532	1207.16	501.462	1033.53	351.697	356.358	143.575	821.103	292.866	1043.56	491.9	309.504	474.801
Kcnq5	92.9074	-2.54084	0.520931	-4.87751	1.07435e-06	9.05867e-06	62.0154	73.8124	42.8857	58.4487	97.9528	98.3449	336.851	10.4301	34.8692	28.5239	109.274	97.3202	202.635	69.7808	74.1547	89.2205
Faf1	894.705	-1.16657	0.239188	-4.8772	1.07602e-06	9.06791e-06	1372.71	612.095	721.981	713.794	1374.21	815.466	1553.34	632.343	609.72	588.905	684.873	848.298	1580.04	736.587	758.944	711.976
Ppfibp1	1025.21	1.25823	0.25801	4.87668	1.07884e-06	9.08685e-06	1451.67	1102.7	974.608	1267.48	491.092	1137.87	417.504	1121.35	1245.45	1800.16	845.07	1187.62	538.031	890.357	1067.84	864.518
Cpeb3	75.7788	-1.45798	0.299011	-4.87602	1.08246e-06	9.11241e-06	89.3663	64.2053	53.7166	53.3362	138.517	64.8378	124.966	29.2812	60.4374	50.2102	70.3235	64.6716	138.136	92.158	69.7946	48.5045
Rasl11b	21.9075	6.20673	1.27307	4.8754	1.08587e-06	9.13623e-06	15.1492	11.4739	24.8118	37.646	0	20.1353	0	51.5323	26.4241	62.7124	16.1151	5.6908	0	14.0769	28.0506	36.702
Rhog	411.082	1.14073	0.233983	4.87527	1.0866e-06	9.13756e-06	352.423	420.833	465.355	474.03	255.677	422.159	198.375	791.165	446.125	426.963	462.221	413.991	288.035	453.362	336.704	369.888
Kif23	120.977	2.34437	0.480948	4.87448	1.09095e-06	9.16918e-06	41.1532	144.894	156.664	108.018	13.1759	65.0463	42.4337	188.634	211.853	214.82	107.668	158.77	42.5248	125.056	172.995	141.918
Tram2	336.904	1.10579	0.226892	4.87364	1.09561e-06	9.20346e-06	331.053	356.339	379.546	490.85	282.364	250.494	160.325	425.024	415.758	489.223	288.772	348.209	163.394	290.189	362.887	356.044
Serpina10	645.549	-2.38205	0.488798	-4.87329	1.09753e-06	9.21472e-06	325.422	635.097	468.463	339.431	1625.85	704.985	2089.07	155.661	137.436	176.625	909.813	606.1	585.911	619.974	468.437	480.509
Serpinb5	58.4943	5.07642	1.04191	4.87221	1.10358e-06	9.26051e-06	54.3455	92.6118	55.6304	67.9875	1.57013	33.1065	0	120.492	94.7924	258.913	27.0987	10.2075	8.11642	22.0933	47.798	41.1447
1810011O10Rik	692.545	-1.13573	0.233124	-4.8718	1.10588e-06	9.27495e-06	539.441	775.015	605.707	496.387	946.031	722.408	1604.99	615.086	506.74	506.101	462.026	485.503	1113.62	512.627	618.663	570.367
Sdk2	99.3499	2.98877	0.613602	4.87086	1.11114e-06	9.31411e-06	16.9305	160.3	125.783	238.5	19.1831	68.8501	14.1742	137.403	120.589	86.5967	56.0125	62.5972	24.6244	174.522	141.65	141.882
Cox6b2	17.7123	6.24336	1.282	4.87003	1.11581e-06	9.34821e-06	5.7038	19.5935	23.0675	35.0697	0	14.8816	0	54.1828	31.7621	21.29	15.6278	6.42915	0	18.7815	14.2382	22.7695
Mrps12	151.102	-1.14065	0.234274	-4.86887	1.1224e-06	9.39846e-06	105.889	105.771	105.109	108.371	323.859	110.886	254.918	134.845	137.328	99.1979	136.837	126.471	230.027	168.809	145.446	123.872
Ccl8	298.213	4.83979	0.994241	4.86783	1.12833e-06	9.4431e-06	6.67349	341.175	524.642	557.404	42.1629	207.951	2.4961	476.719	446.211	558.636	259.113	644.273	7.97341	279.051	167.228	249.704
Eml4	560.404	0.887044	0.182247	4.86726	1.13157e-06	9.46515e-06	379.359	503.444	559.663	601.83	363.961	543.513	367.349	660.952	704.527	969.796	494.728	579.997	293.776	553.66	707.533	682.383
Fmnl2	447.654	1.67851	0.344937	4.86614	1.13799e-06	9.51384e-06	733.861	430.991	608.074	731.825	238.185	307.574	93.4426	393.819	530.173	807.492	366.334	409.277	198.992	370.783	505.916	435.725
Pgap1	502.857	1.31087	0.269438	4.8652	1.1434e-06	9.5489e-06	486.483	736.896	548.184	650.56	164.005	408.019	235.845	480.394	627.396	872.933	421.554	540.384	298.442	490.738	522.913	560.974
Svip	340.458	-1.77059	0.363925	-4.86526	1.14305e-06	9.5489e-06	172.399	261.989	266.875	216.035	529.672	350.856	798.753	84.8581	239.79	166.446	370.331	289.129	733.553	333.828	332.809	300.004
Slc26a6	127.545	-1.87968	0.386508	-4.86325	1.15476e-06	9.63867e-06	91.6845	116.351	80.4139	70.3592	276.495	127.599	249.484	73.183	81.7733	29.6974	131.834	60.7565	318.453	111.528	99.3134	121.792
Syt11	148.163	1.3964	0.287196	4.8622	1.1609e-06	9.68485e-06	152.988	185.697	154.087	226.065	82.4933	100.609	69.7402	226.189	196.017	211.91	155.989	114.198	75.6342	146.03	163.904	109.057
Uqcrc1	706.8	-0.656578	0.135055	-4.86157	1.16456e-06	9.71017e-06	742.206	595.573	675.889	678.149	975.51	667.964	973.476	609.493	539.69	514.717	714.871	707.786	1006.86	673.205	636.578	596.839
Mrpl54	212.407	-1.25049	0.257258	-4.86083	1.16893e-06	9.74153e-06	166.028	185.295	167.359	129.468	399.985	218.735	371.978	224.787	135.194	107.519	282.309	149.755	403.418	173.635	140.225	142.831
Ola1	838.203	-0.679818	0.1399	-4.8593	1.17802e-06	9.81208e-06	698.133	641.326	814.993	815.306	1073.47	726.888	1440.3	658.263	744.741	840.501	698.505	808.966	1124.85	778.753	831.323	714.94
Acad8	463.621	-0.930987	0.191625	-4.85838	1.18347e-06	9.85226e-06	437.618	412.851	421.516	371.446	716.764	459.217	664.423	311.086	437.178	277.022	447.76	365.317	821.225	417.484	438.679	418.346
Slc7a2	806.204	-0.92117	0.189625	-4.85787	1.18658e-06	9.87293e-06	582.674	694.459	714.623	624.647	1010.66	702.448	1499.09	604.788	839.672	877.19	495.532	721.651	1442.73	572.81	750.275	766.026
Stim1	847.53	-0.917094	0.188833	-4.85665	1.19389e-06	9.9285e-06	1188.99	679.823	779.677	665.422	1365.02	749.018	1238.07	597.249	763.602	588.284	777.932	728.672	1368.77	704.863	638.434	726.656
Akap1	588.339	-1.03189	0.212506	-4.85581	1.19894e-06	9.96524e-06	971.24	627.263	427.727	469.524	806.554	596.451	990.983	308.166	449.056	394.665	609.421	634.992	737.214	507.732	417.602	464.835
Rpl32	7212.27	-1.14078	0.234964	-4.85514	1.203e-06	9.9937e-06	11732	5680.36	5910.43	5196.39	12814.9	5666.91	10788.2	5998.98	5155.09	3601.48	6857.63	5449.17	13211.9	6220.77	4966.6	6145.59
Piezo2	261.332	1.88441	0.388156	4.85479	1.20515e-06	1.00063e-05	79.7276	233.571	294.971	366.994	120.325	158.084	91.6181	649.001	311.611	525.855	145.029	216.142	118.546	231.833	377.942	260.055
Prrg3	190.099	1.32499	0.272952	4.8543	1.20816e-06	1.0026e-05	283.33	173.789	204.608	271.415	132.889	151.812	65.4087	277.45	266.557	210.777	150.092	160.132	107.224	167.568	231.068	187.467
Pdlim4	85.3652	2.38298	0.491103	4.85231	1.22032e-06	1.01216e-05	115.293	136.488	82.6196	84.7532	13.736	86.4761	30.1401	195.503	65.8661	87.8819	107.878	66.7687	18.5448	118.791	52.9263	102.177
Ndufv2	993.37	-0.829812	0.171049	-4.85131	1.22646e-06	1.01671e-05	1153.5	694.37	855.901	878.534	1661.08	818.764	1543.26	938.284	793.203	770.965	872.77	990.313	1417.18	807.44	795	903.356
Flnc	162.513	1.65832	0.341941	4.84973	1.23628e-06	1.02432e-05	111.816	259.93	205.977	162.257	84.7532	173.351	52.6838	285.747	191.871	197.611	163.442	106.663	64.1105	183.861	175.528	180.598
Eif3m	2323.51	-0.96449	0.198881	-4.84957	1.23727e-06	1.0246e-05	3097.15	1620.14	1991.19	1947	4207.47	1977.62	3617.05	1641.95	1927.03	1866.19	2152.27	2388.12	3161.74	1885.16	1926.55	1769.49
H3f3a	3647.52	0.468774	0.0966833	4.84856	1.24364e-06	1.02933e-05	3107.07	3641.56	4075.38	4365.47	3022.02	3738.86	3100.13	4469.02	3913.49	3623.87	3720.17	3687.77	2995.6	3845.99	3349.04	3704.89
Aarsd1	262.048	-1.39906	0.288591	-4.84789	1.2478e-06	1.03136e-05	303.314	292.435	170.009	129.247	409	291.359	554.961	212.362	158.504	102.234	341.701	218.868	364.031	204.172	187.139	253.427
Ncoa3	671.791	1.21974	0.251598	4.84795	1.24744e-06	1.03136e-05	630.335	765.062	799.427	817.862	393.331	651.294	196.817	692.006	794.233	1093.11	668.294	814.515	414.411	708.123	659.277	650.555
Polr1d	920.13	-1.03568	0.213637	-4.84785	1.24805e-06	1.03136e-05	1149.9	650.863	715.658	605.54	1663.23	887.474	1257.23	933.289	711.191	543.837	944.971	798.289	1643.28	801.636	704.551	711.142
Stab1	1703.35	2.2488	0.463946	4.84712	1.25266e-06	1.03462e-05	383.002	1551.32	1571.8	1995.88	741.51	1384.72	321.019	5678.93	2432.46	1911.39	1163.04	2249.61	784.337	2109.19	1398.95	1576.46
Slc44a1	1487.39	0.724459	0.149487	4.84629	1.25789e-06	1.0384e-05	1633.06	1518.39	1522.54	1785.94	997.459	1315.63	962.606	1477.83	1846.85	2063.59	1201.75	1478.79	1050.38	1455.49	1854.89	1633.07
Klhdc8a	32.3926	-3.36023	0.693467	-4.84555	1.26259e-06	1.04173e-05	3.33675	51.3869	7.2867	5.77194	39.5277	36.4654	97.348	9.18845	14.7444	8.84247	26.6212	10.8632	148.837	23.771	18.1233	16.1679
Ap1s3	320.526	-1.00574	0.207607	-4.84444	1.26969e-06	1.04705e-05	228.667	297.779	241.306	285.446	451.293	337.468	606.967	211.721	234.959	261.939	341.668	297.983	404.872	271.944	360.881	293.517
Steap3	563.252	1.83857	0.379672	4.84253	1.28196e-06	1.05661e-05	184.067	785.702	903.886	1011.09	152.404	579.682	240.045	661.026	622.788	573.424	708.183	487.635	278.506	708.031	535.516	580.042
Pard6g	105.37	1.48864	0.307516	4.84087	1.29272e-06	1.06492e-05	147.929	98.5617	135.715	132.755	52.7037	80.8151	57.4104	169.716	132.699	153.443	69.8068	81.0564	42.5248	84.7489	130.158	115.87
Slc12a4	325.791	1.06806	0.220701	4.83942	1.30219e-06	1.07216e-05	302.092	409.746	278.725	437.79	208.493	400.304	163.311	470.497	367.377	322.737	367.118	296.451	186.216	353.257	309.187	339.347
Ptplad2	415.904	2.2068	0.456073	4.8387	1.30694e-06	1.07551e-05	58.9453	416.022	476.341	578.617	134.841	507.695	105.693	515.964	644.308	863.536	271.341	662.172	119.161	499.46	448.179	352.19
Slc25a1	665.628	-0.79473	0.164255	-4.8384	1.30886e-06	1.07653e-05	477.287	657.956	531.109	514.207	1014.14	662.984	1009.13	701.886	525.859	519.035	627.919	579.837	939.502	725.646	581.222	582.321
Ints3	841.324	-0.779473	0.161122	-4.83779	1.31293e-06	1.07931e-05	765.973	810.595	753.785	739.642	1174.67	793.993	1333.68	637.971	699.343	540.248	868.938	740.461	1133.26	827.637	793.933	847.057
Mrpl24	849.413	-0.728271	0.150581	-4.83642	1.32197e-06	1.08618e-05	855.812	754.275	675.087	689.758	1391.65	802.312	1068.91	900.909	636.155	682.181	892.126	826.829	1148.67	802.913	729.967	733.055
Rel	197.295	1.58386	0.327591	4.83485	1.33247e-06	1.09423e-05	164.613	228.293	231.353	249.842	84.3258	182.327	104.836	206.47	283.247	384.387	146.121	258.211	53.156	188.101	220.775	170.661
Rab1	4435.23	-0.951998	0.196911	-4.83465	1.33377e-06	1.09473e-05	3337.2	3305.64	4060.24	4263.72	7613.7	3768.32	8211.77	2616.5	3530.7	4061.25	4271.24	4292.5	5166.31	4130.16	4209.35	4125.08
Lias	329.804	-0.853613	0.176608	-4.83336	1.34246e-06	1.10129e-05	380.326	297.829	244.684	276.06	434.927	374.594	499.462	255.206	304.283	262.783	289.078	310.015	530.277	265.604	303.78	247.95
Aurkaip1	563.654	-1.1165	0.23104	-4.83248	1.3484e-06	1.10559e-05	521.129	465.874	422.6	416.224	1026.22	551.081	892.937	606.769	396.598	263.345	681.813	376.505	1080.16	531.653	351.924	433.635
Ptpn6	513.786	1.32698	0.274607	4.83228	1.34977e-06	1.10614e-05	295.294	623.876	642.735	674.03	312.989	592.17	279.031	864.393	489.561	632.33	388.659	613.02	208.254	671.541	512.24	420.46
Card9	49.9305	2.59444	0.536947	4.83184	1.35278e-06	1.10803e-05	39.9952	79.7134	63.1545	57.1724	13.0511	74.8949	17.3072	116.177	50.7319	51.5216	51.732	57.9401	5.26524	56.3051	31.0072	32.9191
Abcd4	60.2133	2.03247	0.420753	4.83056	1.36152e-06	1.11461e-05	60.0614	68.235	72.867	69.2632	21.0815	69.9741	19.9688	138.908	85.3621	70.2196	64.4826	44.2886	26.578	64.0784	39.5417	48.5036
Ccdc17	52.6488	-1.33192	0.275888	-4.82776	1.38074e-06	1.12975e-05	42.7668	52.6049	42.7119	36.5359	79.6871	53.4918	96.1127	41.0526	35.3688	32.8057	41.951	36.46	120.482	46.8174	37.8699	45.6614
Pear1	287.133	1.49658	0.31003	4.82719	1.38473e-06	1.13243e-05	442.255	391.283	338.538	305.961	136.003	267.308	151.833	645.38	291.744	276.764	288.127	201.601	133.932	311.172	214.251	197.968
Drosha	553.239	0.670972	0.139006	4.82694	1.3865e-06	1.13329e-05	494.466	582.474	590.979	634.869	383.22	533.433	376.518	666.156	658.369	623.089	507.036	653.179	443.064	530.428	616.926	557.622
Zfp672	327.249	-1.02101	0.211571	-4.82585	1.39406e-06	1.13888e-05	285.655	337.612	311.79	239.364	419.805	277.984	603.399	239.535	193.953	229.625	369.897	342.714	476.127	286.682	295.854	325.991
Eif2b2	455.187	-1.32964	0.275542	-4.82552	1.39636e-06	1.14017e-05	547.936	314.901	366.457	338.616	750.326	313.869	779.168	443.213	250.367	176.786	503.585	370.991	1109.03	391.738	285.774	340.229
Dnajc21	497.171	-1.34429	0.278699	-4.82346	1.41088e-06	1.15142e-05	625.889	272.437	436.935	413.208	1023.25	379.287	896.577	236.734	310.763	349.583	575.306	457.595	739.136	417.684	415.607	404.743
Eif5a	5893.79	-0.929928	0.192865	-4.82166	1.42366e-06	1.16125e-05	4533.48	4595.15	4978.78	5087.68	9474.41	5877.74	10596.1	5178.24	4784.97	3249.07	6890.98	4786.44	8549.97	5796.69	4632.09	5288.84
Gatc	323.303	-0.817523	0.169625	-4.81959	1.43853e-06	1.17278e-05	354.807	251.038	271.43	264.685	519.131	327.203	474.259	228.63	314.288	251.75	303.482	322.555	430.564	287.319	283.382	288.327
Pafah1b3	126.432	1.72572	0.358151	4.8184	1.44714e-06	1.17919e-05	122.779	158.582	125.967	119.287	48.2836	140.446	61.7024	290.616	138.6	151.482	117.334	115.931	43.7997	144.265	117.445	126.397
Ston1	289.468	1.47836	0.306843	4.81797	1.45024e-06	1.1811e-05	373.775	318.052	298.287	415.086	175.542	233.733	78.5339	278.9	516.323	419.131	261.845	241.496	152.44	253.269	375.818	239.259
Rttn	100.866	1.70226	0.353396	4.81686	1.45834e-06	1.18708e-05	75.6329	101.089	115.676	128.632	10.5407	123.194	44.9298	90.263	149.772	158.124	67.4405	126.181	55.8138	105.419	141.691	119.463
Eef1b2	8302.13	-0.813907	0.168996	-4.81612	1.46374e-06	1.19087e-05	11100.5	6568.28	7312.02	6431.31	13522.4	7297.64	11189.9	7196.64	6738.87	6206.6	7820.89	8878.6	11782.6	7319.36	6845.71	6622.72
Chac2	189.711	-1.6728	0.34736	-4.81576	1.46639e-06	1.19241e-05	92.4322	117.553	158.947	162.746	421.037	161.32	384.344	56.7505	116.46	127.46	222.627	190.797	373.452	146.166	152.157	151.128
Oaz1	1686.97	-0.877101	0.182151	-4.81525	1.47016e-06	1.19485e-05	1500.05	1348.37	1437.28	1524.09	3180.66	1470.44	2631.99	1910.23	1426.05	968.554	1278.55	1110.45	2866.99	1685.12	1288.51	1364.18
Eif2ak1	1130.48	-0.728807	0.151373	-4.81465	1.47455e-06	1.1978e-05	1449.26	959.521	1016.53	1008.7	1708.1	975.842	1542.98	886.735	959.112	938.576	979.412	1047.82	1558.79	1056.39	1028.85	971.035
Ccpg1	3746.74	-1.20903	0.251121	-4.81454	1.47541e-06	1.19789e-05	5162.3	3341.97	3047.08	2871.74	5501.53	3900.48	6040.07	1431.61	2647.68	2257.16	3811.13	3370.87	5789.51	3699.05	3698.83	3376.89
Fig4	404.257	-0.735389	0.152758	-4.81406	1.47891e-06	1.20011e-05	389.287	379.084	336.099	373.527	529.672	341.986	569.111	270.789	385.681	371.384	397.544	416.981	603.321	397.906	360.818	344.915
Cbfb	776.716	0.814628	0.169319	4.8112	1.50023e-06	1.21679e-05	604.2	542.999	801.658	997.036	457.976	725.574	526.936	752.361	880.426	1177.24	673.097	946.676	476.956	962.372	967.93	934.024
Serinc2	634.683	1.45364	0.30217	4.81066	1.50433e-06	1.21948e-05	975.508	717.241	666.461	654.989	286.541	662.347	310.538	1470.17	608.954	618.05	612.968	482.163	335.005	617.437	487.453	649.102
Tmem117	45.1591	2.7858	0.579123	4.81038	1.50642e-06	1.22055e-05	53.3879	53.0717	53.7394	68.4387	7.90555	19.711	9.98441	102.694	60.5295	95.1866	28.396	40.946	13.289	23.771	51.0747	40.4197
Ppp1r3c	52.5819	2.44337	0.508056	4.80924	1.51502e-06	1.22688e-05	35.592	72.4471	67.402	67.6141	21.0815	47.3064	7.48831	94.0465	72.1697	106.63	25.4381	37.6035	13.289	35.1398	72.4931	65.5697
Ddx46	40.4503	17.5609	3.65231	4.80817	1.5232e-06	1.23287e-05	204.649	149.945	0	82.4559	0	0	0	0	0	0.520134	204.69	0	0	0	4.94387	0
Ugt1a6b	46.5792	7.42136	1.5436	4.80781	1.52591e-06	1.23444e-05	4.46955	8.46282	154.488	153.164	0	37.6239	0	3.80061	16.3497	12.0184	23.1627	15.1109	0	36.3404	182.898	97.3782
Anks6	57.7568	2.07816	0.432355	4.8066	1.53517e-06	1.24129e-05	80.046	78.5136	85.8057	42.3816	18.4626	61.1938	11.6588	102.481	95.3908	45.9821	63.4136	51.3057	27.522	51.7535	35.1455	73.0525
Glipr1	94.3369	2.76186	0.574941	4.80373	1.55739e-06	1.25861e-05	79.5711	105.484	109.73	141.425	32.4399	59.6452	10.1005	175.57	117.684	276.878	43.2771	99.1586	18.0531	77.8283	95.2925	67.2529
Rgs12	186.226	1.49947	0.312267	4.80189	1.57177e-06	1.26958e-05	124.311	182.698	218.617	250.162	64.5037	204.669	112.792	343.249	326.779	243.251	103.69	188.004	129.33	126.629	186.583	174.35
2010300C02Rik	912.19	-1.42365	0.296569	-4.80041	1.58341e-06	1.27767e-05	1476.15	823.152	685.468	513.949	1409.52	886.047	1246.63	431.29	639.257	355.54	1164.27	646.323	1909.66	829.455	729.095	849.227
Slc41a1	3530.3	-1.85989	0.387437	-4.8005	1.58266e-06	1.27767e-05	3423.73	4869.97	2370.64	1527.03	3819.92	4143.62	8031.89	821.995	1724.71	1234.13	4574.74	2802.29	5686.97	3750.42	3813.98	3888.83
Mcf2l	516.153	-1.13576	0.236603	-4.80029	1.58437e-06	1.2778e-05	655.31	461.195	445.562	353.901	757.659	511.758	731.283	344.04	339.04	248.38	645.381	429.88	953.693	432.096	451.651	497.627
Ube2e1	528.112	-0.663175	0.138261	-4.79653	1.61434e-06	1.3013e-05	379.594	423.548	501.305	484.622	769.112	470.257	786.309	445.203	448.019	632.696	451.522	516.729	674.041	437.016	536.277	493.537
Casp4	81.3775	2.07652	0.433123	4.79431	1.63236e-06	1.31448e-05	72.161	85.7354	88.4809	95.5093	22.6142	103.102	14.1393	99.7594	81.7323	173.689	57.7639	96.9339	34.0395	105.977	73.1175	97.2841
Syn2	26.0907	-2.2626	0.471934	-4.79432	1.63229e-06	1.31448e-05	23.3572	13.4785	8.19754	10.7193	73.7851	31.5376	42.4337	10.8099	19.4005	5.7216	21.297	24.2334	61.1294	42.3744	17.2995	11.6768
Cd163	486.157	1.39725	0.291556	4.79238	1.64816e-06	1.32652e-05	337.55	318.122	644.353	891.897	529.133	433.722	202.525	942.757	891.846	392.396	442.992	469.848	228.956	497.523	283.034	271.85
Dclk1	343.326	2.85716	0.596304	4.79145	1.65579e-06	1.33198e-05	59.2826	519.906	497.017	505.989	92.3307	163.909	9.53631	503.338	421.538	943.05	253.449	231.072	98.5501	277.719	501.792	414.731
Slamf6	27.4139	4.26125	0.889846	4.78875	1.67823e-06	1.34935e-05	6.40933	28.9702	22.7607	31.5007	0	13.261	1.36219	65.3459	59.4226	63.9892	18.7504	26.6599	5.10885	37.8216	12.6679	44.592
Kdelc2	417.49	1.46442	0.305832	4.7883	1.68202e-06	1.3517e-05	174.623	471.748	460.884	615.948	202.909	344.943	184.712	526.444	585.118	770.335	362.049	481.325	207.309	351.398	510.747	429.347
A530054K11Rik	890.484	1.90095	0.39709	4.78721	1.69113e-06	1.35816e-05	1817.41	566.941	1045.64	1466.07	498.05	662.29	237.13	1272.33	1304.49	1305.56	656.657	1068.78	287.043	749.304	730.698	579.349
Uqcrb	1193.71	-0.624354	0.130423	-4.78714	1.69177e-06	1.35816e-05	897.827	851.773	1119.44	1103.32	1871.46	1047.48	1595.62	1161.34	1027.42	1043.47	1033.29	1322.48	1634.69	1051.75	1195.98	1142.06
1810011H11Rik	38.4223	5.52214	1.15379	4.78609	1.70063e-06	1.36458e-05	4.44899	30.3267	50.0961	80.8071	5.27037	25.6243	0	121.071	65.9616	70.7397	20.7054	49.3024	0	23.771	28.0087	38.6233
Osgepl1	165.887	-1.03449	0.216267	-4.78339	1.72367e-06	1.38235e-05	167.308	165.434	144.078	145.795	272.89	143.564	227.783	120.777	138.879	128.095	124.861	155.736	345.521	121.795	101.613	150.055
Tmem234	1362.13	-0.942071	0.196986	-4.78244	1.73184e-06	1.3882e-05	2140.73	1248.89	1220.31	928.197	1961.29	1252.55	2120.63	1030.24	1037.33	830.856	1376.16	1154.94	1991.48	1187.2	1090.17	1223.1
Ngfr	48.8631	4.24505	0.88825	4.77911	1.76072e-06	1.41063e-05	12.2347	90.1377	60.1153	61.0176	2.63518	34.4943	4.9922	91.344	48.8892	102.989	75.1311	28.4115	2.6578	50.6426	46.9558	69.1626
6330419J24Rik	71.4657	-1.55631	0.325733	-4.77787	1.77161e-06	1.41864e-05	38.9287	67.3926	43.7202	48.6492	92.2314	65.0463	179.719	34.5918	55.0973	45.2526	56.792	56.8231	127.574	85.7824	75.7883	70.0608
Gsta1	61.7035	6.69943	1.40236	4.77724	1.77721e-06	1.4224e-05	513.334	82.4564	31.8731	59.0252	0	45.5728	0	83.4125	23.4877	20.4786	37.4226	7.56872	0	25.4552	25.7383	31.4314
Parvg	51.3372	3.18421	0.666688	4.77617	1.78663e-06	1.42922e-05	23.5528	67.9618	40.7738	41.5763	7.99428	49.6937	3.78618	99.5465	80.6324	104.63	42.5525	106.112	10.0786	70.9487	36.8123	34.7423
Eif4e3	183.823	1.27299	0.266551	4.77578	1.79011e-06	1.43054e-05	120.123	163.427	229.531	282	139.665	190.211	77.3792	218.901	242.118	306.365	151.445	173.812	85.0497	186.034	202.651	172.457
Slc16a3	41.4246	3.35943	0.703416	4.77588	1.78927e-06	1.43054e-05	21.4737	59.1464	43.8524	63.7339	16.5013	61.0693	4.81891	74.1926	52.4986	40.7449	31.9459	48.4108	1.91879	69.7602	23.1944	49.5316
Isg20	240.272	-1.86906	0.391378	-4.77558	1.79194e-06	1.43061e-05	125.446	252.348	146.608	119.076	516.335	184.831	748.445	163.949	139.492	89.8175	403.741	112.647	294.426	225.535	157.23	164.425
Siglec1	472.876	2.50966	0.525521	4.77557	1.79201e-06	1.43061e-05	54.2792	790.616	710.13	503.924	130.533	505.361	103.225	673.178	615.642	488.162	669.866	764.617	95.5997	700.498	360.424	399.958
Acp6	296.368	-0.912984	0.191256	-4.77363	1.80935e-06	1.44372e-05	355.059	282.334	244.601	200.117	390.273	294.802	316.543	201.728	231.056	223.043	326.834	294.169	534.091	281.582	275.265	290.386
Sepn1	633.461	1.61719	0.338822	4.77297	1.81526e-06	1.4477e-05	215.97	806.754	718.607	820.753	275.714	594.544	361.863	1238.26	852.895	831.064	606.622	584.446	255.533	631.277	682.377	658.696
Sfrp2	364.932	4.02676	0.843791	4.77222	1.82203e-06	1.45237e-05	9.48692	486.284	593.896	664.237	54.9432	321.305	10.6423	531.194	408.91	748.795	381.782	441.115	32.7451	407.469	381.772	364.338
Kdelr1	1730.88	-0.668118	0.140025	-4.77141	1.82939e-06	1.4575e-05	1514.88	1458.21	1537.49	1604.6	2874.98	1559.14	2219.03	1753.37	1537.29	1195.29	1643.42	1482.41	2575.41	1528.58	1514.12	1695.83
Ipo4	945.958	-0.908194	0.190483	-4.76785	1.862e-06	1.48273e-05	845.63	819.019	787.222	773.16	1588.48	811.019	1606.79	824.068	887.321	513.664	1224.07	706.367	1409.68	828.129	671.308	839.402
Ghrl	53.7438	6.38758	1.33986	4.76734	1.86672e-06	1.48574e-05	175.735	141.525	44.631	18.1404	0	0	0	81.6151	14.7444	39.531	206.463	0	0	0	28.8325	108.684
Eda2r	128.277	2.06514	0.433211	4.76706	1.86937e-06	1.4871e-05	105.89	122.664	138.452	184.437	45.6329	95.8815	45.9819	122.483	236.007	314.086	102.911	164.202	30.923	84.8289	152.469	105.576
Prorsd1	186.273	-0.876806	0.183989	-4.76554	1.88347e-06	1.49756e-05	148.617	174.229	147.207	150.138	263.975	155.028	327.992	157.208	160.515	184.356	166.351	190.88	254.829	147.006	205.911	146.126
Fra10ac1	188.469	-0.919991	0.193065	-4.76519	1.88677e-06	1.49943e-05	113.449	158.373	162.129	157.491	329.398	165.572	297.036	151.339	167.62	160.725	187.532	198.045	279.069	146.76	172.995	167.966
Slc25a25	299.047	-1.01309	0.212626	-4.76465	1.89186e-06	1.50271e-05	320.109	232.593	181.57	240.527	424.343	296.121	401.762	203.204	211.901	198.415	360.235	327.053	440.415	328.403	278.557	339.543
Tnfsf12	165.58	1.42163	0.298399	4.7642	1.89605e-06	1.50528e-05	144.862	241.02	179.25	205.9	73.386	225.19	90.236	301.543	212.508	140.99	173.233	120.234	88.8191	144.87	139.942	167.297
Etv3	414.357	0.813754	0.170878	4.7622	1.91498e-06	1.51916e-05	412.318	472.952	487.099	430.151	303.54	517.904	211.063	409.994	435.823	545.39	436.806	418.17	237.762	414.168	450.461	446.107
Mfhas1	250.61	1.14595	0.240638	4.76214	1.91546e-06	1.51916e-05	211.03	277.97	251.548	321.031	141.855	352.004	134.405	291.196	275.587	339.765	289.814	228.602	110.236	298.916	274.96	210.846
Rab30	68.4203	2.22585	0.467608	4.76007	1.93525e-06	1.53408e-05	83.7047	66.0643	73.5237	110.569	20.9926	53.9712	20.128	86.7537	117.364	136.184	41.6345	51.2832	21.3179	63.5276	87.349	60.3573
Car6	19.9449	6.31125	1.32599	4.75966	1.93924e-06	1.53648e-05	18.5233	5.43919	40.3805	46.5847	0	18.4434	0	37.5058	27.2835	20.9158	14.4753	57.9857	0	11.9529	12.703	6.92537
Itgbl1	217.051	2.79377	0.586987	4.75951	1.94066e-06	1.53682e-05	228.292	275.125	181.641	249.714	35.3121	91.747	55.6065	226.29	469.932	1038.18	98.9347	69.5639	30.9955	71.8686	198.634	150.975
Rragd	367.226	-1.54907	0.325554	-4.75826	1.95266e-06	1.54555e-05	447.811	394.996	216.888	220.797	532.091	467.386	609.906	99.0552	272.395	172.337	377.08	299.167	630.262	398.299	394.922	342.224
Zfp7	121.856	1.27086	0.267353	4.75348	1.99943e-06	1.58178e-05	142.368	128.046	162.129	107.193	60.6092	123.194	74.8831	157.825	172.276	154.483	108.26	138.715	50.4982	113.688	124.392	131.139
Slc25a12	370.54	-1.33554	0.28105	-4.75195	2.01469e-06	1.59305e-05	403.105	348.922	225.579	250.586	385.154	250.831	937.319	303.551	256.144	263.909	296.676	317.087	645.891	316.513	455.759	271.613
Six4	94.4015	-1.54801	0.325828	-4.751	2.02413e-06	1.59972e-05	53.2564	89.5265	74.7735	68.6943	189.567	89.8859	227.883	40.012	69.9137	60.9501	114.655	70.9363	134.863	60.7144	74.0973	90.6954
BC003331	1018.31	-1.18785	0.250119	-4.74913	2.04296e-06	1.61258e-05	1090.34	897.546	791.027	786.593	1335.82	1061.27	1684.59	366.804	799.998	836.706	1003.81	1162.26	1663.71	803.617	1086.56	922.332
Gdf6	64.9007	5.37507	1.13181	4.74908	2.04349e-06	1.61258e-05	20.0205	88.4528	66.4911	61.8422	2.63518	114.324	2.4961	85.9391	72.1697	166.446	53.8341	119.496	0	78.5477	52.7223	52.9947
Pcmtd1	1699.76	-1.27628	0.268743	-4.74909	2.04338e-06	1.61258e-05	1466.42	1577.47	1154.43	1239.52	2356.64	1848.02	3069.14	501.386	1417.14	1392.92	1796.51	1799.46	2402.3	1813	1826.39	1535.44
Cdk14	267.947	1.78575	0.376038	4.74884	2.04582e-06	1.61362e-05	84.8472	273.288	304.484	394.543	112.329	183.62	104.363	325.839	450.604	613.744	175.113	277.427	104.205	262.778	347.112	272.848
[truncated: 19,632 more rows]

## Sheet: DE_G12CvsWT_results
Gene	baseMean	log2FoldChange	lfcSE	stat	pvalue	padj	MZH320	MZH365	MZH380	MZH381	MZH383	MZH406	MZH416	MZH423	MZH424	MZH446	MZH454	MZH469	MZH470	MZH472	MZH516	MZH518
							G13D	G13D	G12D	G12D	WT	G12R	WT	G12D	G12D	G12C	G13D	G12R	WT	G12R	G12C	G12C
Gkn3	3450.56	7.56446	0.500168	15.1238	1.12754e-51	1.77689e-47	1004.36	4153.07	6947.87	5648.25	36.8926	2363.35	14.9766	8395	3446.3	3997.32	3082.15	3336.68	21.2624	2956.91	4039.84	5764.75
Cilp	2661.89	5.62095	0.403791	13.9204	4.7598e-44	3.75048e-40	1308.22	3534.55	3492.3	3940.37	65.876	2388.97	59.9032	4904.52	5003.05	6260.89	1909.53	2064.17	108.964	2274.93	2597.47	2676.54
Scara3	2592.28	2.3187	0.171154	13.5474	8.20776e-42	4.31154e-38	2372.43	2811.96	3024.89	3281.76	658.796	3051.26	571.607	3558.09	3461.04	3798.62	1951.63	3287.38	712.291	3048.89	3034	2851.83
Lyz2	16531.1	3.81826	0.288111	13.2528	4.34942e-40	1.71356e-36	7532.15	12962.1	26341.4	30747.9	1952.67	23856.2	970.984	26690.8	22548.8	27053.3	10611.8	20723.7	1211.96	20020.4	16640.5	14632.8
Cldn2	1867.39	7.10093	0.539866	13.1531	1.63272e-39	5.14601e-36	1527.83	1656.02	2254.4	3001.36	15.4252	1210.52	2.43518	4529.56	2368.14	4946.74	1171.6	1893.8	53.0713	1286.59	1878.31	2082.47
Sox4	1111.39	2.75293	0.210946	13.0504	6.32319e-39	1.66079e-35	845.309	1344.48	1371.72	1273.95	223.991	1241.79	237.13	1369.62	1272.67	2018.68	990.31	1126.43	276.411	1241.26	1624.51	1323.97
Ctss	3187.88	4.06926	0.31251	13.0212	9.27024e-39	2.087e-35	1766.25	2486.79	4709.94	5527.04	308.316	3679.06	177.223	5890.34	4132.3	6217.29	2193	4489.02	223.255	3535.68	3139.45	2531.17
Csf2rb	537.162	4.3048	0.334381	12.8739	6.31073e-38	1.24313e-34	314.766	511.342	745.976	858.369	34.2574	722.408	14.9766	1039.38	785.331	689.192	416.475	735.357	37.2092	684.192	504.157	501.204
Onecut2	992.147	6.62619	0.526865	12.5766	2.83899e-36	4.97107e-33	952.09	818.825	1262.43	1697.78	28.9871	341.002	17.4728	1642.54	1344.85	4178.82	427.125	534.808	18.6047	372.07	1138.48	1098.47
Mpeg1	2170.75	4.425	0.355772	12.4377	1.63078e-35	2.56994e-32	1111.14	2143.93	2788.98	2861.23	189.733	2756.58	112.325	2404.13	2687.35	5271.67	1699.62	3565.65	140.864	2765.71	2379.09	1853.92
Slc26a9	694.081	5.68101	0.459061	12.3753	3.5561e-35	5.0946e-32	1680.42	964.549	586.175	586.018	2.47638	637.453	30.4939	647.134	870.401	730.182	820.547	859.412	13.0952	989.404	853.963	833.578
Trf	5733.53	4.03313	0.342589	11.7725	5.41109e-32	7.10611e-29	2646.43	4968.5	7260.93	7436.33	536.247	6357.68	380.057	15629.5	7423.84	8177.59	4485.2	8287.37	288.905	6409.08	5393.82	6054.99
Golm1	1277.14	3.97461	0.342872	11.5921	4.51713e-31	5.4758e-28	966.544	1439.68	1813.48	2293.11	134.394	711.567	84.8675	3262.98	1633.52	2656.9	1011.02	907.498	116.943	781.343	1308.17	1312.29
Cfi	1047.53	4.33304	0.375363	11.5436	7.95184e-31	8.95093e-28	429.328	1154.94	1776.13	1877.53	105.407	1124.51	79.8753	1269.63	1085.65	1760.69	744.803	1403.86	37.2092	1184.42	1366.66	1359.9
Ctse	2928.71	7.25036	0.634078	11.4345	2.81192e-30	2.9542e-27	4703.4	3182.05	3905.17	5237.55	11.8508	928.539	11.9273	9691	3162.24	7791.22	1583.63	1590.78	53.3398	997.259	1971.34	2038.12
Slit3	1870.5	2.61055	0.2294	11.3799	5.26423e-30	5.18494e-27	2476.44	2941.43	2320.32	2619.77	312.484	1801.38	316.405	1836.45	2865.36	2425.94	1731.69	1913.48	423.844	1939.78	1953.71	2049.43
Lgmn	2059.65	2.77931	0.245443	11.3236	1.00239e-29	9.29218e-27	1372.37	2298.15	2727.06	2586.56	314.419	2222.97	335.683	3549.41	2589.75	2794.03	1851.35	3450.17	333.242	2574.14	2045.81	1909.33
F5	523.562	4.84373	0.428131	11.3137	1.1229e-29	9.83095e-27	295.858	555.147	962.755	1132.12	26.3518	345.928	14.9766	697.782	618.487	1216.1	307.623	418.652	53.156	251.146	678.799	802.106
Fcgr3	1157.74	3.4091	0.303126	11.2465	2.41067e-29	1.99946e-26	666.111	879.905	1587.56	1903.81	185.471	1290.72	79.9272	2336.34	1480.24	1824.61	816.378	1701.81	111.598	1474.52	1147.57	1037.33
Lbp	2081.79	4.84006	0.433821	11.1568	6.63265e-29	5.2262e-26	2930	1938.61	3608.29	3848.3	127.527	1829.58	30.216	3384.05	3083.78	3757.78	1107.69	2410.02	97.741	1657.87	1714.7	1782.42
Zim1	1069.57	4.65572	0.418855	11.1154	1.05626e-28	7.92647e-26	797.72	1927.33	1159.98	2155.23	100.861	425.763	43.715	1202.36	1906.57	1559.52	636.128	670.269	67.493	702.858	1930.06	1827.3
Muc6	1112.89	6.82271	0.620791	10.9903	4.25328e-28	3.0467e-25	1057.79	687.21	2064.21	1799.55	37.8505	129.11	11.9509	3271.45	948.173	1376.62	388.902	83.5098	12.7251	251.455	1345.05	4340.66
Itgam	1193.88	3.56523	0.324589	10.9839	4.56994e-28	3.1312e-25	706.267	1131.23	1633.62	1569.18	173.834	1948.97	53.3393	1395.38	1679.32	1828.35	960.074	2144.44	116.059	1561.01	1132.53	1068.45
Csf2rb2	394.386	4.99437	0.454931	10.9783	4.85906e-28	3.19058e-25	196.868	442.264	620.28	638.211	21.0815	408.018	7.48831	703.187	536.229	690.233	322.413	448.735	18.6046	455.784	342.695	458.09
Ccr2	1528.86	4.72404	0.433835	10.889	1.30027e-27	8.19638e-25	298.813	1156.34	2066.58	2434.02	98.6861	2658.77	74.5275	1779.81	2124.28	3333.68	898.559	2501.02	65.0277	1991.95	1781.87	1197.78
Cyp1b1	1507.01	4.35832	0.401944	10.8431	2.1506e-27	1.30351e-24	543.89	1758.95	2091.28	2424.21	137.029	1941.53	57.4104	1681.49	1880.29	2885.24	1518	2247.85	98.3387	1737.35	1554.48	1554.81
Sh3pxd2b	1088.51	3.21848	0.297844	10.8059	3.22617e-27	1.88301e-24	742.906	1234.49	1541.27	1823.42	231.004	1054.8	79.1799	1865.65	1423.45	1703.81	910.396	1064.44	137.628	1153	1220.99	1229.77
Cp	3952.49	2.05953	0.193552	10.6407	1.92665e-26	1.08436e-23	2376.16	3236.68	4206.17	4704.59	1332.71	5461.78	1195.55	4323.36	5011.61	5904.27	2605.76	7517.61	1020.24	5471.7	4251.25	4620.4
Cd44	1726.54	4.09177	0.392246	10.4317	1.77762e-25	9.65984e-23	634.624	1436.85	2470.17	3243.57	165.037	1411.25	162.717	3652.85	2282.53	4694.66	1051.53	1607.58	135.371	1479.88	1578.6	1617.4
Laptm5	1777.62	3.04095	0.294489	10.3262	5.36526e-25	2.72746e-22	734.48	1910.06	2665.1	2818.77	289.717	2614.81	188.668	2716.17	2414.27	2226.97	1512.49	2234.29	195.3	2616.67	1693.45	1610.7
Notch2	909.224	1.91449	0.18537	10.3279	5.26802e-25	2.72746e-22	925.391	1069.86	1030.16	1209.63	271.424	1093.96	284.556	892.361	1261.81	1233.26	792.13	1077.13	313.621	1050.06	1017.38	1024.86
Itga2	566.908	4.94553	0.480406	10.2945	7.46122e-25	3.67442e-22	656.227	409.41	622.102	765.194	26.3518	831.804	27.4571	1138.83	733.338	1108.43	279.227	945.101	13.289	550.868	476.972	485.935
Fcgr2b	1955.72	3.74411	0.363888	10.2892	7.88384e-25	3.76489e-22	778.18	1433.81	2989.42	3622.8	250.3	2209.01	67.559	3458.41	2866.17	2903.48	1320.55	3376.56	169.597	2237.94	1794.56	1813.19
C3	24493.9	3.54961	0.346588	10.2416	1.29076e-24	5.98266e-22	9608.94	34135.5	32904.8	34028.6	3263.84	26864.7	2058.18	28019.2	36129.1	38621.7	21082.5	38763.6	2340.3	32999.4	26754	24328
Thbs2	967.312	3.99299	0.390597	10.2228	1.56734e-24	7.05704e-22	501.624	1272.88	1367.17	1872.58	131.759	588.374	87.3636	1670.14	1390.63	2280.84	610.514	697.754	61.1294	764.807	1029.73	1149.72
Olfml3	1989.87	4.362	0.433059	10.0725	7.3076e-24	3.1989e-21	740.478	2537.42	2951.11	3755.7	155.052	1468.62	69.6629	5035.8	2957.27	4020.67	1439.7	1585.29	144.28	1421.54	1628.59	1926.74
Tgfbr2	2753.72	2.29154	0.227862	10.0567	8.58436e-24	3.65624e-21	2150.01	3613.77	3678.39	4181.15	737.196	2574.35	560.802	3681.48	4052.24	4432.49	2814.58	2479.85	755.453	2728.42	3000.4	2618.96
Tnfrsf1b	507.052	2.68917	0.267816	10.0411	1.00515e-23	4.16846e-21	370.379	577.049	658.536	752.001	115.948	556.836	67.3948	801.017	687.553	727.163	449.012	602.492	79.7341	703.829	486.034	477.851
Jtb	836.419	-1.54619	0.154224	-10.0256	1.1763e-23	4.75316e-21	792.153	607.352	617.616	527.796	1851.3	698.921	1624.13	499.2	579.436	508.54	790.962	675.935	1682.12	667.317	661.983	597.952
Ccl6	3789.37	4.02399	0.401925	10.0118	1.35256e-23	5.32874e-21	1540.71	2407.63	5956.3	6782.31	418.774	4924.74	94.0562	7572.18	5472.1	5420.81	3063.03	6219.32	206.283	4309.92	3473.75	2768
Naip2	339.905	2.2509	0.225268	9.99209	1.65059e-23	6.34431e-21	341.05	411.125	394.502	448.587	81.2531	389.53	85.1714	417.161	412.134	516.792	333.056	386.482	96.0236	397.266	391.224	337.129
Tspan8	691.919	5.09088	0.511098	9.96067	2.26524e-23	8.4995e-21	1148.82	794.141	786.707	1023.4	38.9259	346.6	8.46079	1857.53	775.266	1634.84	590.277	434.825	38.9444	339.222	651.67	601.076
Runx1	356.837	4.30977	0.433403	9.94403	2.67781e-23	9.81387e-21	281.954	376.028	485.176	563.328	28.3213	316.379	14.6972	718.334	498.463	799.095	263.863	393.004	31.006	288.626	307.263	343.853
Cftr	829.095	5.01156	0.506442	9.89562	4.34916e-23	1.55769e-20	211.587	725.101	1009.58	1591.98	57.4407	557.961	54.4091	1581.76	756.235	2976.33	394.386	842.335	39.5003	560.506	957.727	948.689
Ear2	683.33	4.87051	0.493348	9.87236	5.48602e-23	1.9212e-20	193.531	249.353	1318.89	1745.6	44.7981	1474.38	9.98441	615.626	931.999	614.812	388.079	1176.57	13.289	788.578	787.539	580.247
Cfh	3042.83	3.15394	0.319741	9.86407	5.95864e-23	2.04135e-20	2176.15	3668.04	4054.12	5254.89	532.69	2607.22	458.035	3654.11	4843.92	7015.53	2177.2	3059.13	458.336	2847.08	3108.87	2769.94
Lgals3	370.088	3.6413	0.369904	9.84391	7.28234e-23	2.44175e-20	379.03	306.597	417.237	509.317	32.5517	563.716	23.1253	724.309	420.185	511.464	346.866	616.761	32.8311	457.478	315.504	264.441
Elf4	593.25	2.39008	0.243112	9.8312	8.26245e-23	2.71267e-20	418.815	546.119	705.165	858.64	179.018	582.484	123.544	797.831	804.325	1022.2	495.23	721.762	144.444	777.285	739.813	575.324
Lox	1300.62	3.29401	0.336521	9.78841	1.26264e-22	4.06081e-20	1264.83	1464.46	1625.22	1575.69	209.242	1184.77	163.035	2559.34	2080.41	2568.56	779.028	1560.28	145.189	1126.08	1381.8	1122.03
Osmr	895.028	2.46891	0.253261	9.74849	1.87232e-22	5.90119e-20	893.728	1026.19	1048.88	1224.19	279.057	782.79	234.502	874.84	1163.56	1649.07	854.177	1160.14	169.474	848.328	1059.29	1052.23
Syk	566.374	2.70821	0.278724	9.71645	2.56564e-22	7.92783e-20	299.072	555.297	796.596	898.593	119.824	819.222	65.2693	729.533	754.92	801.928	497.669	749.816	108.107	762.941	565.6	537.604
Tmem173	606.857	3.30361	0.340148	9.71226	2.67352e-22	8.10232e-20	279.174	799.445	661.268	706.65	76.4203	703.683	69.8909	1067.48	780.675	902.972	586.851	771.29	90.3653	782.377	742.231	688.931
B4galt6	1222.23	2.45312	0.253401	9.6808	3.63844e-22	1.08185e-19	1430.35	1107.77	1401.78	1639.23	287.235	1060.45	302.028	1718.24	1523.32	2450.92	931.152	1424.76	358.803	1183.38	1388.08	1348.22
Capn6	408.059	3.2726	0.340694	9.60569	7.56527e-22	2.2078e-19	176.923	392.483	492.843	675.84	81.7998	326.425	57.487	507.415	636.119	839.047	192.385	507.782	74.5178	344.623	640.368	582.881
Rassf2	620.47	2.47867	0.258138	9.60213	7.83117e-22	2.24384e-19	387.393	634.921	727.058	792.485	183.165	711.085	107.306	637.387	736.693	915.331	706.493	873.891	135.673	888.715	672.557	817.36
Psap	11956.3	1.63296	0.170113	9.59927	8.05148e-22	2.26577e-19	9100.98	11515.3	16022.7	18433.6	3974.86	14767.7	3138.36	18429.8	14602.1	14069.8	10929.4	15323.8	4417.4	14889.3	10779.2	10905.9
Ccr1	321.202	4.59254	0.482273	9.5227	1.68745e-21	4.66535e-19	94.5411	315.061	404.412	413.93	21.0815	383.379	19.9688	525.363	390.337	669.947	236.042	523.942	15.9468	420.644	402.831	301.8
Mafb	258.734	3.04657	0.32108	9.48851	2.34366e-21	6.36789e-19	226.899	363.078	276.895	327.351	47.4333	272.997	37.4415	456.18	312.736	380.746	305.257	241.498	31.8936	276.984	304.801	277.549
Wfdc17	395.574	4.67602	0.495135	9.44394	3.59026e-21	9.58964e-19	119.011	349.599	604.796	627.492	13.1759	445.469	22.4649	710.754	491.22	758.892	309.398	691.069	21.2624	468.186	384.708	311.681
Mmp14	1654.2	2.98981	0.317405	9.41954	4.53048e-21	1.18993e-18	1507.1	2282.08	2045.74	2766.41	289.87	1382.73	167.239	4168.31	2022.3	2208.54	1205.65	1197.46	268.438	1405.59	1591.55	1958.11
Vtcn1	221.428	3.65295	0.389877	9.3695	7.28795e-21	1.8828e-18	229.123	232.505	230.442	271.281	36.8926	225.691	17.4727	376.186	262.294	414.036	189.898	319.212	18.6046	220.14	232.308	266.77
Il1rn	354.776	5.47679	0.586198	9.34291	9.37259e-21	2.3823e-18	241.97	360.796	293.039	411.726	12.9889	742.323	24.533	537.74	245.898	657.25	221.603	574.627	0	567.565	503.887	280.468
Clca1	267.806	3.00191	0.32192	9.32503	1.10957e-20	2.77551e-18	153.944	183.935	329.801	305.455	50.3785	309.82	45.2081	348.629	456.863	493.086	172.345	444.732	45.4624	311.29	374.832	259.112
Mien1	603.937	-1.67988	0.181277	-9.26694	1.91571e-20	4.71714e-18	374.828	411.937	446.31	459.281	1330.77	530.226	1283	463.747	400.426	333.413	585.667	483.832	1196.01	505.393	413.54	444.617
Ephb2	472.982	3.19314	0.345148	9.2515	2.21371e-20	5.36706e-18	399.614	719.592	646.781	854.642	64.2328	271.52	40.9593	736.553	682.932	805.519	506.328	300.295	102.077	390.839	558.017	487.806
Serping1	5749.15	2.50487	0.271484	9.22659	2.79394e-20	6.67117e-18	3608.52	7444.59	8229.62	9367.83	1551.12	5179.09	940.679	9180.98	8262.75	9230.97	5121.54	5694.64	1115.27	5820.97	5514.34	5723.44
Fam115a	433.048	1.97369	0.21455	9.19919	3.60645e-20	8.48268e-18	321.113	400.327	521.976	543.482	182.913	349.915	118.215	596.535	676.653	659.125	359.19	407.026	161.92	483.582	631.125	515.675
Synpo	800.788	2.23101	0.243908	9.14692	5.85776e-20	1.35754e-17	692.688	713.44	1065.44	1365.38	237.303	694.722	137.822	1404.78	1030.5	1147.72	788.114	941.381	210.244	792.365	869.28	721.443
Rps27l	1896.22	-1.7162	0.18821	-9.11852	7.61594e-20	1.73941e-17	1361.88	1251.11	1478.88	1321.04	4602.47	1519.47	4080.28	1067.86	1381.47	946.238	1629.23	1600.75	3738.06	1523.51	1382.07	1455.18
Igf2	1586.72	3.78438	0.417191	9.07109	1.17837e-19	2.65284e-17	467.734	1216.14	2064.57	3481.33	190.769	426.865	117.94	3629.73	4020.52	3358.02	629.787	702.368	209.301	1058.56	1560.01	2253.83
Fabp4	711.531	-1.97987	0.219184	-9.03292	1.67152e-19	3.71008e-17	491.466	544.324	470.263	469.744	1762.82	563.764	1097.82	626.414	612.367	313.425	517.858	840.557	1524.49	749.725	410.663	388.803
Sprr2a2	383.785	9.81958	1.08887	9.01817	1.91263e-19	4.18627e-17	111.775	258.011	697.993	555.952	0	202.056	0.611685	1872.86	288.53	736.191	169.356	101.33	0.65131	267.448	472.239	405.559
Gcnt3	640.559	8.56162	0.953964	8.97477	2.83932e-19	6.12942e-17	806.38	605.691	910.838	1081.83	2.63518	238.503	0	2004.7	746.53	1838.19	412.925	252.361	5.3156	233.576	475.324	634.14
Pirb	773.18	3.73167	0.417703	8.93378	4.11677e-19	8.76705e-17	211.972	771.294	1105.97	1154.79	93.2477	1093.96	53.3052	1084.12	986.464	1351.75	644.514	1308.94	57.0312	1115.42	747.616	590.484
Il1r1	836.744	2.31438	0.259875	8.90575	5.3027e-19	1.1142e-16	649.103	797.826	1021.04	1202.41	269.805	906.827	140.222	1096.66	947.46	1566.83	724.195	898.946	307.924	882.718	1072.83	903.103
Nckap1l	741.516	3.19918	0.359628	8.89581	5.79927e-19	1.20251e-16	223.562	693.302	1012.85	1259.93	97.5018	816.036	82.3714	1152.88	977.784	1228.58	493.38	1126.43	111.628	1143.08	729.05	715.878
Cox7b	1281.63	-1.22621	0.138963	-8.82404	1.10405e-18	2.25957e-16	1015.34	876.718	992.403	942.586	2547.96	1120.06	2336.2	1105.4	944.651	890.878	1148.54	1150.27	2158.41	1154.63	1025.5	1096.46
Tm4sf4	959.957	2.36121	0.267684	8.82088	1.13566e-18	2.29446e-16	857.544	1268.67	929.965	940.826	245.072	1257.56	182.215	1628.52	918.806	1384.63	957.182	1067.1	271.096	1250.56	995.957	1203.61
Ccl9	1911.94	3.9255	0.445616	8.80916	1.26082e-18	2.5151e-16	643.99	1106.81	3098.5	3495.9	283.972	2318.53	68.0354	2920.09	2681.65	2978.94	1660.24	3398.19	86.6488	2286.33	2169.55	1393.64
Pld1	927.939	1.66101	0.188794	8.79801	1.39269e-18	2.74342e-16	684.122	1031.63	1068.28	1065.85	424.625	956.009	460.727	928.965	1104.09	1483.59	714.956	1115.78	364.309	980.03	1268.05	1196.01
Spp1	18774.2	2.96767	0.338127	8.77679	1.68202e-18	3.27246e-16	5972.03	17466.8	20545.1	22630.7	4105.27	21123.7	2788.88	32468.7	23110.3	40494	13092.6	25495.8	4160.53	20953.7	23164.9	22813.6
Extl1	110.586	-3.42484	0.39124	-8.75381	2.06276e-18	3.96427e-16	88.8439	83.5625	37.0749	16.7443	275.038	60.1284	339.037	14.3365	24.9426	20.9937	79.4444	37.6454	539.102	65.2282	39.2965	47.951
Nat8	72.337	-4.78268	0.547059	-8.74253	2.27953e-18	4.32809e-16	40.041	29.4843	10.0192	3.29825	374.196	35.4798	167.239	11.8909	18.6245	8.32232	31.3539	27.5759	305.647	71.3131	4.94271	17.9643
Fxyd5	690.224	2.6561	0.305559	8.6926	3.54235e-18	6.6457e-16	413.498	625.874	856.026	1025.33	146.571	772.029	104.446	1368.25	889.47	1125.96	493.325	1025.51	120.291	870.032	639.923	567.054
Gm2663	1022.78	4.41716	0.509458	8.6703	4.30966e-18	7.99011e-16	2762.83	1530.66	696.791	666.246	68.5147	1441.86	59.9065	841.554	675.136	879.565	1490.2	2328.07	0	1051.09	704.337	1167.68
Vimp	1039.62	-2.13436	0.24876	-8.57997	9.49004e-18	1.739e-15	890.911	692.459	725.938	679.439	3188.57	788.44	2174.11	404.292	670.48	480.094	1000.96	857.36	2110.29	747.237	537.108	686.237
Pnlip	509414	-8.28838	0.969928	-8.54536	1.28139e-17	2.32108e-15	15658.2	16239.1	15129.9	7162.15	2.4709e+06	89649.6	2.45469e+06	404.832	2282.27	820.269	85254.2	26548.9	2.8994e+06	42278.3	11191.1	13016.9
Sfrp1	1296.23	3.49993	0.410437	8.52734	1.49758e-17	2.68185e-15	692.931	2069.8	2103.12	1734.05	155.476	800.267	122.309	2565.74	2026.19	2889.41	1148.26	1184.93	178.073	806.148	1028.91	1234.15
Rpl22l1	2036.54	-1.19497	0.140418	-8.5101	1.73787e-17	3.0772e-15	1714.68	1377.58	1679.7	1451.21	4269.61	1677.05	3740.48	1461.6	1617.2	1552.23	1764.58	1837.8	3425.73	1570.87	1788.35	1655.9
Ildr2	939.938	3.52801	0.415024	8.50075	1.88377e-17	3.29848e-15	493.976	1069.63	1114.81	1348.26	196.92	704.534	80.0921	1268.71	1532.49	2648.1	530.999	1032.98	127.314	860.841	1130.43	898.934
Krt20	2400.88	2.61567	0.308359	8.48256	2.20284e-17	3.81479e-15	2898.52	3736.08	2295.31	1677.98	374.196	4138.33	673.948	1709.59	1836.06	1565.12	2633.73	3839.74	353.488	3648.34	3561.23	3472.5
P2rx7	333.47	2.6697	0.31478	8.48116	2.2296e-17	3.81917e-15	224.113	354.032	496.617	515.948	96.6082	340.038	53.0484	486.345	545.183	448.835	192.321	412.854	33.7292	441.974	369.025	324.85
Cd53	658.439	3.25346	0.385116	8.448	2.96341e-17	5.02154e-15	219.113	527.347	942.717	1041.42	113.313	825.891	59.9065	873.984	897.854	1310.77	482.14	1179.91	90.3653	773.075	657.381	539.827
Hp	519.42	5.77225	0.683684	8.44286	3.09673e-17	5.19163e-15	368.154	470.064	729.581	907.019	5.27037	765.773	0	1432.32	557.181	364.102	370.331	1064.6	10.6312	777.209	180.409	308.088
Pla2g7	610.003	3.38199	0.402106	8.41071	4.07541e-17	6.76046e-15	604.706	479.441	868.303	1025.48	114.599	969.854	21.7084	760.657	832.613	1038.45	475.466	768.095	69.3441	693.83	559.736	477.765
Adamts1	913.866	1.95481	0.23247	8.40888	4.13946e-17	6.79518e-15	761.593	1020.72	892.622	1051.54	400.977	1091.7	330.076	802.965	991.32	1840.19	742.375	1180.7	338.512	874.311	1066.52	1235.74
[truncated: 21,534 more rows]

## Sheet: DE_G12RvsWT_results
Gene	baseMean	log2FoldChange	lfcSE	stat	pvalue	padj	MZH320	MZH365	MZH380	MZH381	MZH383	MZH406	MZH416	MZH423	MZH424	MZH446	MZH454	MZH469	MZH470	MZH472	MZH516	MZH518
[truncated: 21,631 more rows]

[truncated: 4 more sheets: DE_G13DvsWT_results, DE_G12CvsG12D_results, DE_G12RvsG12D_results, DE_G13DvsG12D_results]
