# Supplementary material for: An In Vivo Kras Allelic Series Reveals Distinct Phenotypes of Common Oncogenic Variants
Source: Oxford University Press journal article supplement (doi:10.1158/2159-8290.cd-20-0442), 2020-08-12
Supplement: 21598290cd200442-sup-240834_2_supp_6404220_qd0277.xlsx [file 21598290cd200442-sup-240834_2_supp_6404220_qd0277.xlsx]

## Sheet: DE_G12DvsWT_results
Gene	baseMean	log2FoldChange	lfcSE	stat	pvalue	padj	MZ110	MZ222	MZ248	MZ392	MZ394	MZ517	MZ521	MZ572	MZ585	MZ698	MZ753	MZ831	MZ838	MZ89	MZ983	MZ988
							G12D	G12C	G13D	WT	WT	G12C	G13D	G12D	G12R	G12R	G12R	G12D	WT	G13D	G13D	G12C
Zfand5	4825.53	0.985085	0.0964176	10.2169	1.66652e-24	2.37795e-20	6781.08	4108.3	5024.31	3313.58	3368.9	4925.93	4870.54	6098.77	4639.16	4833.08	5140.61	7079.16	3395.95	4637.72	4736.58	4254.79
Micall2	3673.82	0.945942	0.10309	9.17592	4.47721e-20	3.19426e-16	5502.62	3808.1	3643.44	2460.94	2799.79	4300.74	3732.82	4848.34	2988.7	3015.47	3344.91	4675.32	2536.39	3364.31	3760.35	3998.82
Trib2	303.689	4.09291	0.46735	8.7577	1.99268e-18	9.47786e-15	255.508	274.118	195.702	28.999	18.4973	274.216	518.573	602.244	429.028	302.095	357.036	686.206	42.7725	182.176	402.336	289.52
Trim44	3288.48	-1.57873	0.18597	-8.48916	2.08128e-17	7.42444e-14	1428.47	2910.16	2515.24	6001.34	5143.14	3319.8	2905.9	1971.71	3605.86	4369.49	3142.48	1786.44	4372.11	3134.67	3247.71	2761.14
Cdkn3	99.8877	2.56758	0.303466	8.46082	2.65495e-17	7.5767e-14	137.217	164.244	117.421	30.7565	24.9714	120.174	66.066	139.898	88.5608	97.6775	68.1187	173.839	20.5942	85.2915	99.05	164.322
Nrep	388.036	-6.65025	0.790109	-8.41687	3.86667e-17	9.19559e-14	6.36361	192.19	183.942	741.704	726.641	16.5297	207.221	6.88353	1329.35	973.138	190.729	6.92162	563.373	401.728	572.782	89.0758
Gc	732.346	-6.96838	0.838324	-8.31228	9.38802e-17	1.91368e-13	3.15442	185.766	167.062	4102.92	4967.45	274.216	353.86	39.2397	184.01	13.0908	85.7356	33.1666	517.231	328.745	210.372	251.514
Mfsd2a	292.858	2.67829	0.323063	8.29032	1.12946e-16	2.01454e-13	466.199	387.326	441.691	51.4643	89.1096	333.325	273.025	562.764	150.234	153.742	82.0948	474.257	94.2731	250.165	393.87	482.196
Il1a	2565.14	4.66498	0.586858	7.94907	1.87914e-15	2.97926e-12	5159.06	2795.55	1668.71	183.66	361.622	7657.29	1441.69	6868.65	366.051	255.774	1356.5	8856.63	278.022	1085.6	852.882	1854.49
Pbp2	298.737	2.92225	0.383169	7.62653	2.41153e-14	3.44101e-11	564.642	368.134	335.079	47.4529	71.2146	409.685	214.488	655.985	123.001	168.166	232.543	751.395	140.991	231.032	240.174	225.803
Prl2c2	505.314	5.73537	0.778499	7.36721	1.74233e-13	2.26012e-10	1463.65	109.874	510.733	8.78757	35.1449	676.254	893.248	1253.96	155.473	72.5029	735.212	1099.07	27.7229	576.339	309.422	157.615
Spry4	167.669	4.87824	0.6663	7.32138	2.45436e-13	2.91843e-10	626.153	122.334	119.33	9.66633	7.39892	400.945	57.9209	216.671	21.6482	51.3562	122.144	483.775	27.7229	74.5265	113.075	228.039
Fam189b	476.807	-2.83751	0.396122	-7.16322	7.8803e-13	8.64953e-10	158.035	678.365	479.817	654.132	779.512	467.704	405.376	77.7418	824.275	649.248	726.063	48.7217	589.516	363.334	483.707	243.366
Zfp568	1075.54	-1.05163	0.148046	-7.10342	1.21704e-12	1.24042e-09	697.328	1074.11	1038.17	1744.42	1501.18	1152.99	986.305	634.555	934.379	970.181	1025.25	843.809	1260.37	1102.43	1115.38	1127.83
1190002N15Rik	621.641	-2.39974	0.339421	-7.07009	1.54832e-12	1.47286e-09	223.964	261.658	441.999	1000.9	1058.97	303.713	628.079	186.815	1139.48	986.845	405.189	251.609	1432.09	789.981	556.609	278.342
Morc4	499.825	3.11369	0.444234	7.00914	2.39794e-12	2.13851e-09	443.314	708.601	540.774	62.3961	135.009	1047.63	485.559	994.191	198.289	325.412	320.455	1414.62	132.927	276.392	416.903	494.74
S100a7a	423.813	3.95167	0.566565	6.97478	3.06343e-12	2.5713e-09	1474.69	507.458	534.599	36.029	41.6189	648.941	406.351	446.138	197.786	71.4959	98.6546	1163.12	121.189	220.267	519.794	292.874
Tubb6	2445.46	1.81615	0.263527	6.89169	5.51334e-12	4.37054e-09	2473.07	3204.46	3065.36	1053.63	992.381	4947.9	1713.19	4413.61	1136.53	1301.02	1398.78	3976.56	1040.01	1915.33	2299.19	4196.37
Agfg2	2153.36	1.1416	0.165889	6.8817	5.91423e-12	4.44159e-09	3003.82	1964.17	1841.24	1227.62	1199.06	1784.67	2083.66	3292.2	2225.15	2558.18	2469.21	2638.1	1622.5	2222.73	1927.09	2394.35
Ldlrad3	192.054	-3.44165	0.508315	-6.7707	1.28157e-11	8.70794e-09	9.59184	290.116	202.617	342.873	467.832	195.507	137.361	36.015	71.3079	191.892	124.568	50.5108	250.695	198.08	327.841	176.05
Prl2c3	545.957	6.16734	0.909989	6.77737	1.22382e-11	8.70794e-09	1731.78	35.1143	586.15	0	36.9946	112.527	2511.41	1233.49	165.313	92.6425	167.948	595.855	12.6733	915.848	337.471	200.093
Chst15	155.448	-8.84637	1.31667	-6.71875	1.83284e-11	1.18877e-08	1.20938	322.734	106.873	467.63	141.835	26.1647	39.5552	0.654096	58.0983	185.314	306.22	0	244.767	117.319	229.143	239.646
Dpysl2	595.606	2.08584	0.313501	6.65338	2.8644e-11	1.77705e-08	1104.05	619.598	640.565	221.447	171.1	535.322	496.852	1267.61	572.693	857.951	487.401	587.85	304.16	494.359	623.226	545.505
Pycr1	346.847	2.10369	0.317245	6.63112	3.3314e-11	1.98066e-08	332.196	458.373	276.981	131.998	140.924	774.85	285.454	641.114	175.812	316.163	221.462	709.97	119.551	229.846	250.373	484.485
Kansl1l	578.757	-2.07097	0.314642	-6.58196	4.64275e-11	2.6499e-08	188.226	192.763	508.129	1863.73	954.954	230.108	668.844	319.917	488.765	476.265	605.725	365.434	869.244	724.94	565.805	237.259
Etv5	393.886	2.97088	0.452014	6.57255	4.94619e-11	2.71451e-08	327.731	742.04	379.938	117.103	83.0731	1185.82	175.636	586.126	101.33	95.2878	132.382	915.648	36.0066	205.882	282.66	935.504
Abcg1	74.6071	-4.4806	0.684396	-6.5468	5.87829e-11	3.10657e-08	1.47625	8.4817	18.4918	160.389	415.518	9.20305	39.8128	26.3483	80.1288	35.816	83.9188	5.35234	205.363	51.3346	42.6629	9.41655
Nav3	67.5739	6.66498	1.02884	6.47816	9.28483e-11	4.71539e-08	414.671	43.9338	18.7399	2.60844	4.64495	1.99785	37.1647	87.7417	21.3582	14.6223	46.1447	362.531	1.44849	11.0806	11.2207	1.27391
Rplp0	60867.4	0.843123	0.130348	6.46826	9.91392e-11	4.71539e-08	73465.6	77465.5	55809	39772.4	47472	91780.2	59349.3	83859.3	44181.2	43421.9	38573.7	75702.7	42656.1	51426.1	67230.5	81712.5
S100a14	10855	1.31223	0.202725	6.47296	9.60998e-11	4.71539e-08	14594.7	13544.3	10970.9	5060.44	6200.5	14102.3	9137.03	16121.1	7384.37	7485.28	10571.2	17042.4	7970.91	7935.59	10116.7	15443.1
Rpl27	4617.48	0.58083	0.0900378	6.45096	1.11144e-10	5.11585e-08	5234.1	5861.01	4254.41	3823.34	4024.2	6180.49	4051.28	5882.29	3397.82	3484.03	3726.96	5910.68	3543.27	3849.07	4171.18	6485.55
St3gal6	1124.22	4.22185	0.659509	6.40151	1.5385e-10	6.86027e-08	5647.25	1785.39	1268.28	134.542	255.245	1038.77	463.297	1249.95	515.009	360.327	1512.17	1712.62	70.7053	467.768	718.368	787.767
Etv4	367.922	2.9839	0.470254	6.34531	2.21982e-10	9.59836e-08	194.287	631.019	362.619	46.5056	92.4266	804.514	208.15	719.445	120.966	272.937	308.059	734.548	70.1674	265.195	315.975	739.935
Chac1	629.91	3.90651	0.617518	6.32615	2.51356e-10	1.05488e-07	1446.3	177.837	455.364	105.451	77.6887	2103.05	161.997	1194.25	120.049	201.397	164.424	1924.81	121.189	199.566	439.151	1186.03
Emp1	18901.1	3.05091	0.482748	6.31989	2.61751e-10	1.06712e-07	56311.1	15887.2	24189.8	3959.69	1884.28	21107.3	15541.9	20024	17180	10481.1	27967.5	33165.5	7368.23	13253.2	14845.8	19250.7
Smox	8125.34	2.15842	0.341911	6.3128	2.74027e-10	1.08614e-07	8388.17	7052.18	8956.36	2054.35	3583.37	9008.34	9573.31	17080.6	4576.26	7460.46	8767.23	13973.9	3198.1	5650.26	8458.13	12224.5
Gale	1881.21	2.2978	0.364674	6.30098	2.95772e-10	1.14064e-07	5938.7	2372.69	1835.91	653.706	664.798	3344.22	1431.33	1896.91	1211.64	964.57	1459.5	2895.75	862.83	1058.45	1391.24	2117.07
Rhox5	14.9065	8.57367	1.3627	6.29169	3.14022e-10	1.14892e-07	49.4209	12.0542	5.29619	0	0	6.06096	8.36809	95.4387	1.8197	4.76275	2.77743	36.0016	0	0.979136	7.25519	8.26876
RHOX5	14.9065	8.57367	1.3627	6.29169	3.14022e-10	1.14892e-07	49.4209	12.0542	5.29619	0	0	6.06096	8.36809	95.4387	1.8197	4.76275	2.77743	36.0016	0	0.979136	7.25519	8.26876
Kif12	1488.59	-3.41954	0.543923	-6.2868	3.24074e-10	1.15605e-07	146.503	1812.42	1603.32	2869.18	4036.52	1498.08	1582.19	305.735	2879.65	706.591	478.779	336.807	1548.41	1445.89	1223.63	1343.7
Ppif	2446.85	2.7262	0.438347	6.21926	4.99495e-10	1.73836e-07	7732.53	1667.03	2631.18	654.782	759.708	4765.1	1617.12	2481.86	1345.2	880.35	1262.58	4970.91	879.863	1246.21	1627.57	4627.57
Gm13453	20.1745	8.30506	1.33686	6.21234	5.21998e-10	1.77343e-07	82.015	38.5125	0	0	0	15.2949	0	36.6806	33.4563	35.2444	30.536	33.1666	0	0	0	17.8854
Cdk2ap2	2701.82	1.15126	0.186293	6.17982	6.41731e-10	2.0811e-07	3936.11	2269.22	2978.7	1884.46	1680.74	3451.63	2457.97	4155.54	2801.69	1964.36	2328.72	4024.7	1890.07	2244.58	2256.95	2903.73
Gm14440	97.4785	-10.0145	1.62021	-6.18097	6.37094e-10	2.0811e-07	0	0	8.59178	252.203	90.6368	44.7922	8.14512	0	210.578	244.697	172.646	0	316.042	109.306	51.7164	50.3027
Dstyk	733.859	-1.27614	0.20725	-6.15747	7.39184e-10	2.29292e-07	391.752	555.032	551.475	1281.2	1141.99	593.588	749.426	494.385	823.704	954.682	809.915	436.775	788.096	728.143	738.711	702.87
Nup98	103.542	-1.96097	0.31832	-6.16039	7.25675e-10	2.29292e-07	56.7796	81.5558	72.5528	202.114	161.851	81.937	80.5462	40.9458	131.857	138.964	213.752	40.0287	166.338	86.9476	49.0867	51.4206
Serinc5	1374.35	-1.85537	0.301969	-6.14425	8.03414e-10	2.43913e-07	525.211	1029.64	960.37	3502.73	2193.78	926.435	1342.14	719.11	1524.23	1187.23	1556.16	912.654	2114.86	1657.8	1260.48	576.805
2020-09-05	1770.96	2.91733	0.47848	6.09709	1.0802e-09	3.21112e-07	5742.63	1039.84	1948.42	304.05	402.316	644.571	1791.93	2956.62	1140.47	1503.43	3606.77	2128.38	726.341	1549.32	1418.26	1431.95
Rasa4	2038.51	4.75498	0.781461	6.08473	1.16687e-09	3.39796e-07	16096.7	707.657	1582.9	307.06	131.337	691.082	872.846	973.202	2833.52	909.443	1181.62	1453.48	247.428	1776.28	1156.56	1695.05
Tnfsf12	135.399	-5.33932	0.878109	-6.08048	1.19825e-09	3.41958e-07	5.43406	120.006	306.038	142.902	121.087	102.43	70.9367	7.53378	28.8173	162.196	266.053	1.97019	269.225	185.02	110.986	265.744
Trib3	921.174	3.81089	0.628883	6.05977	1.36315e-09	3.81388e-07	931.813	428.835	686.692	142.705	123.472	3546.23	403.039	1793.22	305.871	449.571	121.464	2970.49	139.678	292.049	678.549	1725.1
S100a4	231.649	2.10264	0.348048	6.04123	1.52944e-09	4.19684e-07	240.116	524.294	243.675	72.7746	59.7854	227.79	242.031	377.03	98.8011	92.7916	172.967	355.7	94.0572	206.367	232.099	466.112
Lipg	119.184	3.30701	0.551617	5.99513	2.03328e-09	5.47413e-07	283.898	137.059	196.656	13.1814	12.9481	115.804	83.2612	203.023	34.4403	121.845	132.714	168.12	39.6042	90.2599	108.692	165.44
Rcan3	2187.92	1.33498	0.222848	5.99052	2.0917e-09	5.52714e-07	3721.75	2745.67	2181.49	1198.72	1550.3	2856.37	2119.88	2643.14	1801.17	1085.03	1707.16	3003.91	964.003	2056.76	2229.45	3141.98
Cdh6	1964.46	-4.60193	0.775474	-5.93434	2.95026e-09	7.65404e-07	7.88606	986.599	645.338	7434.29	6411.17	912.232	1960.26	413.723	2496.43	801.559	842.088	312.224	4009.53	1671.05	1406.86	1120.07
Adamts9	122.792	-4.09496	0.69089	-5.92708	3.08367e-09	7.85731e-07	1.66547	66.0581	49.8484	418.404	294.769	108.783	150.83	18.6767	98.2713	123.527	47.2867	29.2916	149.089	216.557	74.8196	116.804
Pamr1	1946.94	-6.90995	1.17222	-5.89476	3.75235e-09	9.11247e-07	0	1531.29	407.135	6339.68	8814.59	2221.42	789.761	15.9059	3254.23	587.076	576.084	135.835	3110.88	1799.97	1044.01	523.09
Rtn4rl1	315.109	-3.65098	0.619432	-5.89408	3.76786e-09	9.11247e-07	18.9265	125.732	258.708	636.22	487.404	206.481	314.04	46.064	644.526	550.82	62.2464	80.0573	708.915	358.555	386.558	156.497
Soga3	107.329	-6.78098	1.15023	-5.89534	3.73917e-09	9.11247e-07	0	73.6268	112.648	300.535	97.1109	13.1099	189.148	0	181.058	27.1886	81.0377	4.57471	106.931	236.001	84.1487	210.154
Glis3	3013.99	-1.26684	0.215275	-5.88478	3.98573e-09	9.47873e-07	1230.87	2035.94	3038.92	3981.6	4295.42	2954.2	3458.8	1518.48	3154.63	3234.19	3358.27	2312.44	3911.37	3649.71	3336.51	2752.49
Rnf186	594.308	4.02325	0.687588	5.85125	4.87899e-09	1.14128e-06	1962.05	304.702	506.915	26.3627	60.1162	1344.86	562.013	771.145	250.922	787.462	197.309	1318.66	162.377	410.724	530.312	312.995
Dock1	2299.64	-1.31375	0.224773	-5.84479	5.07211e-09	1.14879e-06	1501.51	1984.52	1949.38	3338.4	3747.55	1988.34	2557.57	1185.72	2819.18	1833.72	1725.28	1656.04	3706.16	2483.39	2825.12	1492.31
Slc1a4	1211.23	1.52002	0.260002	5.8462	5.02928e-09	1.14879e-06	2281.98	1019.46	1159	724.765	628.237	2029	1369.34	1445.62	1139.36	840.625	882.625	1758	558.706	1105.87	1047.48	1389.65
Pmvk	1709.58	2.06937	0.355464	5.82159	5.82911e-09	1.29962e-06	3738.63	2368.62	2048.43	435.366	452.016	2727.49	1277.26	2214.83	1042.15	1199.75	972.344	2540.68	1135.12	1144.39	1394.41	2661.76
Errfi1	7002.28	1.40448	0.241806	5.80829	6.31146e-09	1.38551e-06	9625.45	6476.64	6641.79	3890.57	4120.07	10990.3	6274.42	9958.52	5360.34	3733.14	7182.39	12476.1	4100.4	5970.02	7082.51	8153.76
Zfp532	418.661	-3.36139	0.5795	-5.8005	6.61185e-09	1.42946e-06	36.0295	286.079	310.382	672.642	833.193	304.872	555.804	60.6414	938.715	540.297	115.522	119.195	728.264	538.97	508.606	149.369
Il6ra	58.7817	-1.84047	0.317701	-5.79308	6.91064e-09	1.47176e-06	28.3898	39.6452	53.4599	94.9058	123.007	36.0523	65.161	24.7381	61.0085	51.3562	56.3741	37.7413	106.139	46.3721	49.0867	67.0703
Cdca8	1060.61	1.78345	0.310319	5.74717	9.07513e-09	1.87671e-06	1191.22	1787.45	1517.99	498.916	278.519	1748.35	654.745	1594.1	724.333	618.397	854.015	1640.89	508.857	889.419	1027.73	1434.8
Pdpr	423.079	-1.60077	0.278465	-5.74856	9.00063e-09	1.87671e-06	208.778	473.544	347.878	678.386	658.443	389.229	411.968	150.819	621.65	515.456	394.815	266.444	558.033	483.476	347.401	262.94
Gramd2	803.268	2.79021	0.487135	5.7278	1.01739e-08	2.07388e-06	2742.77	849.039	1181.99	161.828	133.334	632.241	523.581	1005.97	550.609	838.87	619.237	907.053	376.588	631.143	606.179	1091.85
Amot	3739.11	-1.59493	0.280368	-5.6887	1.28011e-08	2.57267e-06	1291.44	3089.92	3163.53	5945.56	7179.2	1899.57	4362.35	2444.48	4660.24	4296.87	3315.21	2206.89	4841.72	4660.57	3557.59	2910.56
Pkhd1	1416.38	-1.75281	0.308478	-5.68214	1.33019e-08	2.60007e-06	885.562	675.689	1063.05	3772.68	2794.67	971.213	1177.3	616.716	1712.97	949.627	1236.93	1119.45	2262.18	1403.55	895.149	1125.38
Slc24a3	64.2479	-5.50568	0.968698	-5.68359	1.31899e-08	2.60007e-06	2.48967	121.586	30.1386	72.1314	172.271	98.2982	44.2862	3.72114	14.0282	197.104	12.9774	2.49449	157.541	49.6711	26.2895	22.939
Ddit3	693.73	3.19454	0.562804	5.67611	1.3779e-08	2.65693e-06	1418.39	275.425	402.296	149.102	164.365	2962.99	358.138	1007.18	190.191	180.574	274.693	1873.97	156.159	279.217	456.199	950.787
Rpl41	22097.2	0.81875	0.14455	5.66413	1.47773e-08	2.81143e-06	27157.9	27661.9	20446.7	15667.1	17226.9	34020.4	19141.4	31641.6	16029.1	18772.7	14244.6	28151.5	16403.7	16959.4	21813.1	28216.8
Igsf11	44.3176	-3.15369	0.558632	-5.64539	1.64811e-08	3.08818e-06	9.14249	30.641	25.8239	76.4072	187.634	88.6587	28.9905	11.3464	28.5196	11.6742	20.4236	16.9088	78.0539	22.4001	27.0988	45.3577
Tuba4a	5374.08	1.1926	0.211324	5.64348	1.66648e-08	3.08818e-06	9619.01	6662.77	6260.54	3418.5	3317.67	6053.27	3871.11	7583.06	3329.28	4982.82	3735.79	6938.33	3823.82	4433.91	4912.41	7043.01
Dixdc1	221.729	-2.49698	0.443242	-5.63346	1.76632e-08	3.23123e-06	67.0174	184.071	150.376	363.892	511.608	268.538	263.182	48.1773	348.911	155.596	116.19	87.8906	266.11	312.594	232.627	170.891
Ppp2r2b	63.7842	-4.15175	0.741046	-5.60255	2.11219e-08	3.81504e-06	8.2182	19.5341	25.7418	147.436	64.6964	7.96955	34.8961	12.1149	226.172	74.3546	32.168	5.81153	258.135	26.7955	57.8052	18.6982
Cttnbp2	56.8458	-6.37614	1.13899	-5.59807	2.16749e-08	3.86599e-06	0	1.994	21.8937	82.9022	240.851	23.2088	94.9839	2.82274	129.654	67.0592	23.9176	0.946119	39.5883	68.0367	68.6613	43.0127
Zfp191	1032.33	-1.04932	0.187556	-5.59468	2.21031e-08	3.89369e-06	761.405	887.142	887.8	1538.47	1362.32	856.292	1158.93	549.702	1411.12	1023.59	1182.43	734.078	1318.71	1108.39	1063.79	673.053
Fdps	9366.91	1.70885	0.307287	5.5611	2.68083e-08	4.66497e-06	14308.5	10996.4	10881	4252.31	2905.93	15092.8	7651.89	16218.8	5220.17	8277.41	4424.19	13967.7	6452.32	6842.36	9670.09	12708.7
Rplp1	17610.4	0.878923	0.158165	5.55699	2.74469e-08	4.71855e-06	20260.9	21816.2	15994.1	11414.2	13817.5	27671.8	16142.7	26288	11315.1	14406.9	11090.4	23470.5	12846	14004.4	17154.1	24073.8
Bmp4	76.27	-2.54634	0.459487	-5.5417	2.99549e-08	4.91295e-06	13.1161	43.566	45.6481	174.835	101.255	119.756	35.2874	24.6885	145.248	102.316	97.668	23.777	91.3558	46.4821	30.9798	124.34
Pcsk9	4940.3	2.55006	0.460142	5.5419	2.99209e-08	4.91295e-06	8020.12	7139.53	8001.81	842.728	700.123	10811.3	3955.81	4615.78	2436.41	2652.4	701.153	6112.95	1657.83	4628.93	6341.83	10426.1
Rell1	1869.11	0.714485	0.128907	5.54262	2.97984e-08	4.91295e-06	2229.59	1771.13	2132.06	1205.09	1358.91	1714.06	1919.85	2193.02	1694.65	1729.95	2174.4	2118.27	1421.34	2012.52	2199.43	2031.49
Stxbp4	383	-1.41883	0.255788	-5.5469	2.90787e-08	4.91295e-06	204.496	307.21	365.774	707.886	510.208	198.959	401.958	184.826	427.805	376.765	391.447	246.817	483.722	542.247	413.225	364.655
Mthfd2	1034.29	2.95372	0.533899	5.53236	3.15953e-08	5.1231e-06	1281.66	626.724	1074.34	247.018	159.283	3596.87	442.274	1639.5	385.432	573.102	299.916	2778.93	329.277	550.781	787.777	1775.81
Gm26992	30.4861	19.0107	3.45073	5.50918	3.60514e-08	5.77997e-06	0	54.3705	0	0	0	103.787	0	4.26518	4.92004	0	103.352	57.1838	0	108.478	0	51.4206
Flrt2	998.382	-2.70298	0.491228	-5.50249	3.74454e-08	5.93676e-06	120.202	416.419	957.486	1994.78	910.823	439.401	1113.92	166.216	3049.78	1187.34	852.373	396.456	1548.39	989.628	1161.29	669.612
Sec61g	2153.52	0.748443	0.136112	5.49872	3.82555e-08	5.99855e-06	3173.48	2604.04	2527.41	1686.12	1504.92	2737.28	1956.65	2560.81	1681.39	1486.34	1568.99	2532.48	1724.73	1978.89	2101.21	2631.61
Hhat	139.943	-1.79799	0.327539	-5.4894	4.03309e-08	6.25523e-06	64.5945	123.796	83.7222	143.699	274.382	132.18	150.064	45.6603	171.258	210.898	136.381	64.3471	184.854	153.759	159.294	140.193
Gabarapl1	3135.7	-1.13133	0.206216	-5.48613	4.1083e-08	6.30337e-06	2602.4	2442.14	2540.3	6331.45	4315.42	2630.73	2542.18	2146.24	4594.34	3760.08	2895.04	1969.41	4064.18	2466.83	2318.47	2552.03
Sptb	203.811	-2.20712	0.40456	-5.4556	4.88076e-08	7.40889e-06	27.1138	261.326	185.203	193.524	294.809	306.639	266.577	71.0793	125.394	283.067	114.266	55.1728	219.338	274.16	194.903	388.403
Anxa2	69356.2	0.937653	0.172881	5.42368	5.83834e-08	8.76918e-06	79245.9	87292.2	69719.4	43421.4	47188.5	126213	66221.2	82115.1	63755.2	48597.3	54501.4	91723.5	41521.8	52545.8	62963.6	92674.3
Akt3	683.422	-2.72084	0.501991	-5.42011	5.95633e-08	8.85322e-06	104.311	343.481	511.262	2019.15	1187.98	430.92	477.676	220.702	1029.92	868.012	237.483	334.197	1146.72	571.5	824.915	626.53
Tacc1	91.0454	-3.28461	0.606273	-5.41771	6.03685e-08	8.8804e-06	8.87714	75.4419	44.4257	253.866	116.317	78.9686	40.5908	14.5234	67.4155	236.722	62.7978	28.5585	136.657	83.8084	65.4236	142.332
Gkap1	100.236	-2.23026	0.41238	-5.40827	6.3636e-08	9.26554e-06	9.46327	62.2996	84.9631	212.659	189.597	66.6421	96.8364	50.3292	97.4169	129.901	117.446	54.8965	149.704	91.9161	82.3956	107.312
Eif5a	20284.8	0.765975	0.141982	5.39485	6.85792e-08	9.88441e-06	24831	27133.5	22806.5	14146.3	15215.8	28285.4	17020.9	26034.5	12776.2	15429.8	15552.8	25945.9	15807.9	16121.1	20468.6	26981.4
Fam73a	371.547	-1.20125	0.223051	-5.38553	7.22327e-08	1.03069e-05	146.016	337.148	375.375	578.226	526.232	282.761	376.581	283.623	387.901	358.867	462.978	234.53	436.826	394.849	432.798	330.04
Sdc1	17956.5	0.742846	0.138345	5.36952	7.89478e-08	1.10461e-05	23925.4	18668.5	15239.6	11996.9	14089	20710.2	18671.6	22514	16225.8	19034.5	18145	19856.4	13528.7	15341.2	19781.2	19575.7
Tns4	3038.71	3.03847	0.565878	5.36949	7.89617e-08	1.10461e-05	5795.91	5716.96	2641.21	127.673	903.248	2863.62	3913.27	5612.55	1605.4	1357.66	1489.35	7764.2	1301.84	1766.91	3316.49	2443
Got1	1186.74	1.54384	0.287721	5.36577	8.06031e-08	1.10589e-05	1488.32	1448.39	1150.73	543.086	629.872	2655	731.766	1650.97	551.879	1000.08	691.811	1992.66	587.336	894.874	1237.56	1733.51
Myom1	45.2423	-2.61091	0.486429	-5.3675	7.98359e-08	1.10589e-05	15.8352	27.2941	16.2939	147.185	79.8568	13.1624	35.4368	17.9855	77.0599	83.9142	44.8081	13.779	65.2109	35.7496	33.4422	16.8629
Plk3	540.852	3.34974	0.624696	5.3622	8.22158e-08	1.11727e-05	2471.77	336.023	391.733	160.83	137.611	834.366	215.697	586.666	200.88	69.5577	556.613	1180.12	117.189	225.529	368.264	800.773
Osbpl6	62.6626	-3.72711	0.697507	-5.34347	9.11833e-08	1.22745e-05	7.37036	190.303	55.9652	78.0535	74.6557	142.444	13.389	4.70814	44.9716	75.3841	55.3589	5.34444	75.1415	81.1604	55.5176	42.8343
Fjx1	269.194	-3.74264	0.70381	-5.31768	1.051e-07	1.40156e-05	0	428.168	134.605	590.525	703.823	455.57	204.533	75.0672	210.578	223.55	186.739	41.1723	286.734	210.33	324.323	231.393
Arhgap44	979.271	-1.84573	0.347236	-5.31549	1.06373e-07	1.40541e-05	279.412	1205.31	475.078	1538.52	1740.92	1414.85	913.17	453.989	1307.05	1337.91	681.583	566.81	1399.94	713.671	852.952	787.174
Insig1	6088.06	2.82258	0.531496	5.31063	1.09246e-07	1.43012e-05	29913.4	5337.37	6094.43	1992.14	1079.32	9454.44	4152.2	5891.07	2586.96	3765.11	2098.76	7104.52	2993.29	4279.48	5039.28	5627.2
Aprt	2349.34	1.23479	0.232682	5.30678	1.11581e-07	1.44741e-05	4834.15	2855.59	2567.99	1569.46	1722.1	2270.2	2132.21	2959.18	2340.96	1430.92	1461.03	3573.99	1536.64	1960.88	2022.2	2351.93
Mvk	1567.69	1.66068	0.313189	5.30247	1.14245e-07	1.46861e-05	2513.11	2201.98	2188.99	614.737	497.441	1879.48	1248.38	2177.63	918.683	1615.09	1037.26	2046.12	1017.84	1218.62	1852.05	2055.57
Sec61b	2149.3	0.793302	0.149974	5.28962	1.22573e-07	1.5616e-05	2806.14	2690.19	2443.87	1388.42	1673.59	3149.04	2205.49	2383.01	1745.03	1382.9	1510.21	2538.13	1395.2	1826.35	2304.87	2946.29
Slc6a9	1356.88	2.33103	0.440927	5.28664	1.24582e-07	1.57315e-05	2714.88	1307.34	1592.3	459.394	419.466	3789.19	1019.24	1183.81	1533.08	724.52	775.516	2380.3	368.732	955.56	1089.64	1397.16
E2f2	313.361	4.40519	0.834845	5.27665	1.31564e-07	1.64674e-05	2405.76	157.07	338.295	32.4944	17.0997	370.314	100.396	120.259	136.449	124.12	253.335	405.283	88.4785	178.618	175.569	110.227
Slc16a1	3006.75	0.982956	0.18638	5.27394	1.33527e-07	1.65678e-05	4771.06	3305.28	3408.07	1896.36	2050.43	4528.39	3151.26	3492.33	2374.41	1769.27	2287.85	3782.14	2144.96	3030.75	3127.53	2987.98
Creld2	1476.79	1.31413	0.249425	5.26864	1.37441e-07	1.6762e-05	2263.3	1494.06	1324.09	669.613	835.153	3210.84	1236.25	1782.85	932.84	1176.16	1134.53	1915.66	891.887	1129.49	1457.7	2174.2
Klhl24	1895.37	-1.56997	0.297941	-5.26939	1.36876e-07	1.6762e-05	607.226	1168.97	1273.49	2790.05	2092.05	1194.1	2143.98	942.605	2761.13	3279.75	2575.59	1127.66	3074.08	2629.13	1875.81	790.312
Bicc1	11329.8	-2.02456	0.384493	-5.26552	1.39791e-07	1.6904e-05	2523.67	7589.04	10122.7	21458.6	21392.5	8306.01	12768.5	4768.99	18299.8	10363.9	6047.32	7164.96	15979.9	13860.6	11516.4	9114.53
Mgmt	27.9591	-4.17488	0.793686	-5.26011	1.43967e-07	1.72628e-05	1.57721	20.389	19.0928	58.8767	91.5617	34.9598	22.6253	6.82429	9.84009	44.3073	24.6637	3.43103	76.8322	16.5615	3.5062	12.2962
Rbbp9	559.671	-0.930577	0.177006	-5.25732	1.4617e-07	1.73809e-05	318.632	539.556	490.656	726.83	735.467	428.989	507.271	457.018	674.352	705.26	574.558	403.201	794.602	597.151	601.559	399.627
Spin1	3868.53	-0.762196	0.145031	-5.25539	1.4771e-07	1.74188e-05	2603.98	3668.88	3634.32	5563.41	5096.01	3146.38	4058.99	3233.01	4383.76	3460	3916.82	3059.33	4438.84	4478.22	3969.89	3184.72
Scnn1a	2984.16	-1.8158	0.345887	-5.24968	1.52364e-07	1.78203e-05	1172.96	1333.49	1229.89	4361.93	2602.51	2079.6	1667.99	1005.61	4812.21	10282.2	5604.67	1464.86	5860.11	1600.05	1083.68	1584.82
Arhgdia	15014.9	0.550163	0.104857	5.24679	1.54774e-07	1.79551e-05	19485.5	16071.5	15287.2	11797	12354.2	18550.1	13670.6	18107.8	12883.8	13146.1	12557	18432.3	14107.3	12560.8	13861.2	17366
Zcchc11	1446.18	-1.26066	0.240401	-5.24398	1.57149e-07	1.80836e-05	886.103	834.142	1308.07	3119.76	1589	754.889	1528.14	969.734	1968.5	1770.35	1693.29	820.742	1703.06	1713.58	1492.77	986.774
2020-09-02	8399.39	-0.707604	0.135067	-5.2389	1.61535e-07	1.84395e-05	5244.25	7960.18	8693.51	10631.7	9587.47	7292.86	9050.44	5620.65	9945.22	10837.8	9058	6928.15	8840.76	9540.57	8321.66	6836.97
Nfu1	889.846	0.733711	0.140336	5.22825	1.71127e-07	1.93794e-05	1265.8	864.739	682.272	721.866	698.924	1029.33	776.285	1167.53	770.228	714.459	747.961	1351.23	853.039	721.174	901.913	970.781
Rpl17	9976.14	0.594418	0.113824	5.22225	1.76763e-07	1.98601e-05	11477.4	12270.7	8539.27	8059.08	8572.58	14970.4	9108.06	12906.4	8374.9	7153.62	8116.69	12231.6	7623.02	8847.13	9389.59	11977.6
Egln3	10616.9	2.18503	0.419819	5.20469	1.94319e-07	2.1662e-05	23626.6	6379.48	8716.84	3236.46	4097.15	24838.9	10213.1	11678.1	6174.65	11143.3	5470.63	17103.7	4190.92	7821.97	11263.7	13914.9
Lancl2	303.727	-0.94651	0.182092	-5.19798	2.01465e-07	2.22845e-05	182.877	310.27	320.392	359.173	406.138	236.976	334.835	238.544	306.116	324.46	351.902	219.108	475.557	278.114	282.477	232.688
Gm8624	271.248	0.89059	0.171819	5.18331	2.17987e-07	2.39266e-05	307.556	455.353	217.658	192.448	173.875	560.449	193.673	347.186	206.642	181.257	212.577	336.241	169.506	163.958	206.866	414.718
Ccl2	503.466	-5.57156	1.07548	-5.18052	2.21264e-07	2.41009e-05	7.94681	147.813	91.0246	2532.84	3258.41	81.4673	150.478	105.732	418.936	12.1769	39.0057	18.4398	534.906	427.815	211.583	16.8967
Ipo8	1732.05	-0.874705	0.169067	-5.17371	2.29486e-07	2.47718e-05	1200.94	2003.29	1622.19	1845.6	2183.93	1586.26	1890.84	913.376	1763.44	2152.59	1741.97	1328.85	2275.51	1730.02	1726.04	1747.99
Nup62	718.082	1.2542	0.242471	5.17257	2.30895e-07	2.47718e-05	717.631	795.169	795.217	398.077	373.646	1147.12	835.327	728.493	608.117	540.751	633.034	1247.75	358.022	665.77	577.646	1067.54
Fam120c	228.228	-1.42844	0.276866	-5.15933	2.47837e-07	2.60029e-05	101.097	221.22	185.767	375.806	354.768	207.893	224.535	87.9979	275.204	256.167	216.433	195.869	305.421	229.729	245.811	167.934
Sftpd	8248.31	-2.24722	0.435508	-5.16	2.46949e-07	2.60029e-05	1124.55	5621.69	6469.61	11863.2	13204.3	7159.11	13420.4	4013.54	17401.2	11773.7	6808.34	2623.59	11796.5	7039.45	6094.65	5559.01
Sntb2	120.897	2.6368	0.510959	5.16049	2.46308e-07	2.60029e-05	305.979	97.4139	153.697	21.9689	30.5206	168.244	62.4459	96.3931	66.9126	99.6914	169.122	193.281	42.7725	100.197	112.198	213.507
Tspan1	5093.11	3.11519	0.605686	5.14324	2.70038e-07	2.81253e-05	17860.6	3270.22	4672.92	900.209	1129.19	2993.73	6801.23	7525.46	1755.12	3104.39	13471.4	6557.61	1656.76	2617.94	3310.83	3862.1
Aox1	27.9366	5.28112	1.02845	5.13504	2.82083e-07	2.84274e-05	42.5418	12.2148	25.4556	1.92748	1.99468	14.1624	15.2929	52.5875	6.35461	40.5326	43.7313	56.7057	0	18.7522	52.596	62.1362
Cd24a	19434.3	-1.43966	0.280684	-5.12911	2.91115e-07	2.84274e-05	7835.59	16297.6	13809.9	31026.3	32993.6	13799.3	22452.5	14233.8	24713.4	23102.2	14935.6	12123	28739.2	22415.9	22042.6	10428.3
Fermt2	540.766	-2.43342	0.474369	-5.1298	2.90049e-07	2.84274e-05	142.778	548.05	478.731	945.47	991.408	717.82	168.529	122.357	282.286	979.062	867.337	182.273	478.883	497.1	418.79	831.389
Gm10259	428.209	-24.9387	4.85676	-5.13485	2.82368e-07	2.84274e-05	0	233.34	0	0	1300.36	0	1410.01	0	103.321	1869.97	1934.34	0	0	0	0	0
Peg3	300.159	-4.98316	0.971758	-5.12798	2.9286e-07	2.84274e-05	42.8521	51.9999	131.188	2807.32	210.424	17.088	93.2679	51.1484	314.081	203.852	24.9553	10.7149	295.699	201.213	176.037	170.707
Ppp1r26	243.403	-1.47969	0.288272	-5.13296	2.85222e-07	2.84274e-05	92.2586	181.849	190.092	410.486	449.095	220.188	231.131	182.601	203.773	395.152	305.083	144.493	339.205	165.919	206.324	176.8
Rpl13a	4674.49	1.08718	0.211537	5.13943	2.75571e-07	2.84274e-05	3949.34	7076.1	4446.72	2368.25	3098.3	8595.74	4235.46	7049.49	2795.57	3245.51	2944.37	6177	2621.01	4151.13	5304	6733.86
Tmem130	36.8159	-4.63487	0.903163	-5.13182	2.86946e-07	2.84274e-05	1.57721	12.4599	16.2289	257.476	86.9373	6.55496	5.43008	7.67733	18.6962	9.06286	64.5953	5.71838	42.7725	19.8737	10.5186	23.4746
Tmem97	1071.78	1.7923	0.349074	5.13445	2.82968e-07	2.84274e-05	2055.11	1498.59	1452.97	354.139	349.599	1745.81	739.396	1211.31	650.43	979.796	623.638	1603.43	700.995	761.827	1115.85	1305.64
Zbtb10	198.739	-2.05391	0.400069	-5.13389	2.83809e-07	2.84274e-05	67.8201	98.5466	240.57	473.65	196.996	184.631	182.813	87.8628	142.681	221.537	358.21	75.4826	292.279	250.078	169.174	137.494
Phlda1	3721.51	1.87198	0.365443	5.12249	3.01528e-07	2.9071e-05	8011.85	4144.78	3005.6	1456.78	1242.95	8182.46	2404.74	4473.38	2209.81	3855.38	2958.75	6534.19	2495.17	2396.61	2833.66	3338.07
Tmem136	55.0586	-6.09932	1.19419	-5.10749	3.2647e-07	3.12645e-05	0	84.954	6.68249	88.7545	146.129	38.2373	30.7705	0	61.9925	218.516	8.22122	4.57471	80.0005	48.8563	34.1854	29.0638
Cldn6	209.757	24.763	4.85673	5.09871	3.41979e-07	3.16864e-05	1891.08	0	0	0	0	1465.03	0	0	0	0	0	0	0	0	0	0
Fastkd1	125.994	-1.23668	0.24254	-5.09888	3.41664e-07	3.16864e-05	65.4536	117.534	150.933	183.477	182.933	127.77	109.885	64.581	118.058	135.122	89.855	104.979	186.792	140.018	131.892	106.616
Phf2	1229.35	-0.772872	0.151503	-5.10137	3.37204e-07	3.16864e-05	954.213	1053.43	1018.6	1605.49	1619.44	1400.58	1253.44	860.714	1232.96	1567.87	1206.17	999.573	1581	1083.95	1060.62	1171.49
Ttc30b	298.453	-1.26556	0.248049	-5.10205	3.35989e-07	3.16864e-05	173.493	228.809	213.84	545.708	542.896	242.534	333.95	226.055	353.259	335.326	275.998	182.988	317.626	303.903	283.125	215.743
Xlr3b	165.167	-24.7712	4.85677	-5.10035	3.39024e-07	3.16864e-05	0	0	4.36815	1228.9	0	0	0	0	1360.54	38.1106	10.7479	0	0	0	0	0
Acot7	4650.41	1.18757	0.233485	5.08628	3.65156e-07	3.3552e-05	6216.23	6036.6	4822.71	2957.41	3243.54	6127.61	4516.59	6714.56	3789.67	2189.31	4771.01	6519.76	2339.48	4159.06	4086.47	5916.58
Ptbp2	152.071	-1.54819	0.304438	-5.08542	3.66817e-07	3.3552e-05	69.3973	88.3521	84.0085	300.535	254.338	78.6596	149.327	77.6263	202.706	291.018	221.973	112.08	205.15	134.976	110.445	52.5384
Ppfibp2	812.408	-2.03118	0.399727	-5.08142	3.74614e-07	3.40469e-05	351.189	1106.47	358.419	1261.9	1801.8	740.64	792.892	284.452	1367.54	1300.39	611.62	403.82	1183.15	376.768	581.361	476.093
Nhsl2	25.9214	-8.26577	1.6279	-5.07757	3.82287e-07	3.45244e-05	1.43602	1.03132	1.73836	244.838	114.522	2.98408	0.823996	0	24.1898	3.66735	5.34661	0	11.5388	2.62685	0	0
Ccnd1	18662.2	1.13591	0.223875	5.07385	3.89847e-07	3.49857e-05	19107.6	33603.3	18165.6	10379	9000.86	29924.1	17076	18672.4	16826.2	19545.6	10506.5	27186.2	10182	16073.4	15277.8	27068.6
Scai	183.275	-1.72616	0.340503	-5.06943	3.99009e-07	3.5402e-05	77.1399	120.87	173.857	344.758	272.703	103.01	153.426	123.827	285.588	301.22	209.197	55.5337	234.766	210.148	109.287	157.073
Tanc2	505.333	-1.78381	0.351891	-5.06922	3.99448e-07	3.5402e-05	226.174	402.396	311.712	980.877	588.394	823.633	620.136	201.832	550.774	673.417	553.577	221.922	667.904	517.979	426.287	318.32
B230118H07Rik	172.548	-1.38712	0.273942	-5.06353	4.11558e-07	3.5808e-05	104.252	109.116	169.746	282.318	232.541	124.511	124.211	106.009	246.494	161.409	162.872	90.3029	270.535	184.481	225.735	166.236
Fam171a1	2762.07	-1.81519	0.358434	-5.06423	4.1006e-07	3.5808e-05	925.605	2365.71	1262.41	3790.4	4157.75	2363.69	3525.08	1183.75	3269.25	2361.72	2615.06	1921.36	6239.8	3168.36	2543.36	2499.81
Shank2	1671.72	-2.73691	0.540277	-5.06575	4.068e-07	3.5808e-05	88.1687	1045.85	1496.62	3324.66	2248.54	669.519	1437.93	626.544	2216.6	3752.59	1453.59	485.894	2443.78	2152.25	1596.53	1708.45
Uba52	17752.4	0.624622	0.123539	5.05606	4.28005e-07	3.70134e-05	22414.6	19761.2	16486.1	13691.2	14444.9	23915.8	17394.4	23636.6	15191.8	16478.6	13097.1	20689.5	15151.8	15235.6	17052.7	19396.6
Bmf	3028.4	-2.29458	0.4548	-5.04524	4.52941e-07	3.89338e-05	377.129	1597.68	2360.82	3999.81	7026.21	1200.81	3847.64	1523.19	5001.68	5687.48	2216.55	1086.12	3641.54	3448.45	3755.59	1683.64
Isg20	1725.01	1.52999	0.303918	5.03422	4.79793e-07	4.0995e-05	2406.36	1306.53	2014.34	629.847	918.96	2282.85	2009.55	3273.26	953.029	1434.12	1067.46	2270.4	1204.27	1434.45	1785.4	2609.41
Ugt1a6b	165.703	22.308	4.4363	5.02852	4.9429e-07	4.19823e-05	413.039	0	0	0	0	913.494	0	0	972.653	260.619	3.50727	0	0	0	0	87.9369
Sdf2l1	1382.34	1.61461	0.321212	5.0266	4.99247e-07	4.21524e-05	2572.43	1444.22	1469.19	467.499	588.214	2878.72	1146.65	1478.31	984.993	1122.79	702.327	1963.69	906.936	1158.47	1396.34	1836.61
Zfp318	424.632	-1.54491	0.307513	-5.02386	5.06424e-07	4.25068e-05	172.519	521.198	300.153	614.97	565.899	322.883	242.223	171.312	450.2	601.903	669.819	321.495	752.94	374.963	384.848	326.783
Hmga1	4367.09	1.946	0.387673	5.01969	5.17548e-07	4.31865e-05	3710	5372.16	4487.24	1072.3	2034.73	11240.8	3864.46	8111.49	1943.96	3229.34	2229.09	7053.85	1792.45	2326.81	4767.55	6637.19
Spata13	1945.43	-1.60536	0.32005	-5.01597	5.27652e-07	4.37736e-05	942.828	1779.81	1839.26	3249.27	2755.64	1677.22	1602.16	813.543	2965.75	2906.18	1630.72	677.575	1393.61	2381.47	2221.95	2289.93
Irg1	40.7552	-6.67945	1.33257	-5.01246	5.37393e-07	4.4324e-05	1.57721	5.6636	21.0021	301.414	112.834	3.27748	86.8813	1.70607	30.5043	0	12.9191	1.14368	41.1884	4.14036	16.6544	11.1784
Zfp286	50.9171	-4.56261	0.911181	-5.00736	5.51813e-07	4.52518e-05	0	85.1918	50.2991	74.8668	73.6416	21.2289	17.5206	0	63.0102	42.1866	32.0837	9.48898	82.4361	91.3293	94.4171	76.9733
Tmem189	1173.18	2.09395	0.418848	4.99931	5.75349e-07	4.69123e-05	1548.35	1465.99	1712.87	140.338	385.73	1128.86	1195.32	1660.36	1040.87	1238.38	1618.04	1298.77	529.755	671.31	1588.94	1547.01
Tnfrsf8	109.535	4.01925	0.806471	4.98374	6.23659e-07	5.05624e-05	302.129	302.157	114.802	10.0634	10.0281	47.3826	76.2971	58.8591	143.42	16.874	142.902	86.0823	7.42161	68.9672	86.402	278.771
Xlr4a	112.533	-24.1907	4.85681	-4.98077	6.33312e-07	5.1055e-05	0	0	0	926.982	0	0	0	0	760.589	112.007	0.949924	0	0	0	0	0
Ralgps2	1813.18	1.41466	0.284445	4.97342	6.57816e-07	5.27325e-05	4391.47	1772.29	1562.88	907.292	882.78	1799.36	1379.95	1953.72	1969.4	2308.66	2058.19	1933.59	1312.59	1443.33	1497.21	1838.22
Manf	3797.98	1.57972	0.318903	4.95361	7.28479e-07	5.77561e-05	6015.78	4085.08	3768.63	1067.85	1876.36	8610.64	3261.08	4381.53	2679.06	3490.74	2307.28	5504.8	2374.83	2781.11	3225.8	5337.13
Zmynd11	1803.3	-0.923328	0.186396	-4.95359	7.2858e-07	5.77561e-05	1446.16	1564.07	1525.39	2910.27	2413.6	1790.25	1692.45	1041.76	2104.67	1962.59	2165.71	1520.29	2264	1666.42	1598.42	1186.68
Hsd17b12	5543.71	0.87751	0.177427	4.94576	7.5846e-07	5.97926e-05	7630.57	6429.62	6778.88	3950.6	3703.5	6583.77	5267.9	7379.86	3451.09	5437.11	4675.16	6515.13	4061.6	4753.98	5371.47	6709.06
Prdm1	114.462	4.82125	0.976226	4.93866	7.86599e-07	6.16702e-05	395.059	26.464	90.993	4.73784	0	17.6706	79.6969	200.039	14.2428	26.241	122.421	565.054	35.9386	82.2965	93.064	77.4764
Chst11	68.6111	-6.03745	1.22333	-4.93528	8.00365e-07	6.2374e-05	0	43.0433	16.2289	79.9669	420.814	119.082	70.5911	3.41215	7.87207	176.222	50.5018	4.57471	47.5251	19.0457	33.3089	5.58919
Id2	6521.3	-1.67209	0.338869	-4.93432	8.04318e-07	6.2374e-05	3818.43	4998.69	5762.22	10485.3	11719	6525.47	8034.71	2557.4	10814.3	4263.57	4391.31	2885.5	7303.81	7829.43	7876.67	5074.99
Atp6v0e2	691.727	-2.54577	0.516236	-4.93141	8.16397e-07	6.29685e-05	184.534	455.353	912.638	1358.56	627.984	441.368	1130.36	279.796	891.512	738.119	1328.31	107.506	1356.84	208.674	553.102	492.967
Scin	451.446	6.2015	1.2582	4.92887	8.27074e-07	6.3449e-05	6034.07	78.462	77.8577	15.7249	39.9194	110.385	63.6979	69.5732	16.4097	69.7924	320.389	108.825	28.7492	86.6669	33.5346	69.0832
Bcar3	2087.44	1.17063	0.237566	4.92761	8.32426e-07	6.35181e-05	4383.07	1690.02	1826.23	1375.25	1453.89	2545.51	1570.2	2501.96	1619.68	1505.44	2289.02	3308.66	1696.64	1731.5	1589.18	2312.81
Zfp866	338.74	-0.706001	0.143599	-4.91647	8.812e-07	6.68821e-05	237.442	211.28	311.008	408.528	446.374	227.378	374.192	303.461	431.992	451.037	420.456	230.945	412.932	372.703	364.13	215.983
Amigo1	268.87	-1.27006	0.258547	-4.91229	9.00176e-07	6.79609e-05	111.288	306.392	313.029	355.289	387.539	183.7	257.632	191.178	343.266	339.839	335.664	135.504	327.878	196.606	224.628	292.489
Gm10307	655.045	1.99528	0.40629	4.91098	9.06205e-07	6.8056e-05	993.643	1298.1	518.371	165.206	331.102	1115.44	600.929	1306.85	287.331	505.506	206.705	1206.58	383.369	268.296	576.769	716.534
Gprc5c	3258.74	-3.28121	0.668549	-4.90795	9.20312e-07	6.87536e-05	81.8681	3540.96	3182.21	6137.18	7809.68	3733.35	2613.2	573.119	2296.55	4115.49	3615.55	887.437	1051.05	4203.97	2674.86	5623.36
Prpf4b	413.896	-1.06664	0.217638	-4.90099	9.53526e-07	7.08638e-05	290.207	250.331	388.539	681.037	487.404	178.077	396.396	353.157	563.837	520.611	663.57	215.011	632.875	406.584	353.249	241.453
Kirrel3	185.508	3.50057	0.715249	4.89419	9.87101e-07	7.22305e-05	62.0852	114.395	363.828	5.65478	19.4207	131.81	118	460.125	174.712	163.712	293.301	378.612	55.4195	198.785	318.459	109.815
Nphs1	1227.51	0.742058	0.151579	4.89552	9.80467e-07	7.22305e-05	1414.82	1718.41	1031.06	979.855	875.883	2283.41	981.98	1543.9	719.34	822.74	716.45	1738.46	953.709	792.498	978.269	2089.33
Olfml2b	96.7312	-3.25012	0.663964	-4.89503	9.82924e-07	7.22305e-05	6.30885	144.988	79.2353	290.869	264.511	48.0697	47.0607	29.8563	80.6887	102.712	65.7698	26.3046	50.6934	95.2284	49.9633	165.44
Dynap	1769.51	5.37736	1.09912	4.89242	9.9602e-07	7.25113e-05	7039.1	208.42	1277.31	29.8777	26.8211	247.996	2763.91	4933.11	433.948	165.145	3112.32	5472.49	362.775	1021.84	573.263	643.875
Gm3555	10.3922	8.40037	1.71894	4.88693	1.02419e-06	7.41834e-05	52.048	0	0	0	0	3.27748	0	39.2397	0	0	0	69.7643	0	0.828073	0	1.11784
Eif2s3y	250.883	-10.2795	2.10827	-4.87581	1.08365e-06	7.80936e-05	0.58434	0	572.908	5.50554	485.108	0	832.025	0.316041	8.15375	587.097	9.73188	0	844.404	6.86162	661.433	0
Rest	1186.3	-0.69665	0.142935	-4.87391	1.09412e-06	7.84524e-05	809.094	890.997	1017.44	1696.17	1484.35	1006.48	1141.61	962.979	1407.06	1419.04	1319.45	1020.98	1353.89	1345.34	1147.33	958.627
Atp5d	6072.16	0.616562	0.126531	4.87281	1.10023e-06	7.84957e-05	7976.95	6629.43	6243.3	4479.69	4932.86	7554.65	5804.06	7614.48	5629.18	4862.16	4604.89	7466.57	5624.3	5103.69	5911.32	6717.02
Crot	1524.07	-1.14897	0.236143	-4.86558	1.14122e-06	8.10154e-05	952.076	1549.55	1228.52	1764.96	3088.59	1328.54	1519.59	1078.2	1389.67	1237.81	1814.61	1066.95	2017.9	1516.52	1718.75	1112.83
Apcdd1	26.3285	9.53584	1.96149	4.86153	1.16481e-06	8.22807e-05	328.816	7.9473	13.3958	0	0	0	2.7213	8.55002	4.93138	0	15.3032	17.1947	0	8.07376	0.878568	13.445
Atp6v0c	9669.47	0.554492	0.114197	4.85559	1.20031e-06	8.34955e-05	13525.5	8894.17	10425.5	7610.97	8477.17	9229.04	9271.4	11448.5	9021.41	9036.67	9655.23	11007.4	8406.66	9674.22	8709.31	10318.4
Etv1	24.4524	4.08008	0.840159	4.85632	1.19586e-06	8.34955e-05	27.8244	46.5661	55.8949	8.44949	0.615126	30.2596	22.9331	34.3693	10.3298	22.9104	10.1547	35.0544	0.526814	23.4387	18.5994	43.3116
Pkm	88125.1	1.47701	0.304241	4.85475	1.20542e-06	8.34955e-05	135473	91539.7	92870.6	27838.5	42286.8	135452	79420.5	118340	55784.6	101445	55858.3	120564	64361.9	76995.4	93542.9	118229
Slc17a9	176.793	2.54982	0.525128	4.85561	1.20015e-06	8.34955e-05	528.525	116.71	104.792	37.6718	28.4039	110.633	142.493	166.197	260.915	162.52	500.423	238.422	92.8515	109.536	89.8923	138.706
Rpl11	9492.26	0.800475	0.164936	4.85324	1.21458e-06	8.37235e-05	10781.3	12773.2	8603.84	7531.55	7688.33	15129.1	8520.51	12938.6	7584.29	5739.26	7125.86	12370.5	5504.97	7961.95	9233.05	12389.8
Cav1	1409.43	1.81776	0.375173	4.84512	1.26533e-06	8.63878e-05	1723.27	1800.67	1373.33	635.101	542.384	1936.62	1019.85	1673.56	1330.43	706.954	1045.51	4085.09	945.738	1017.84	692.574	2022.01
Rps8	16987.7	0.959307	0.19797	4.84572	1.26154e-06	8.63878e-05	17413.7	24432	16011.3	12206.3	12892.4	29772.5	14206.6	26184	12399.8	9744.08	11472.7	23181.7	9248.69	13507.5	16903.2	22226.7
Arhgap28	35.3377	-5.17834	1.06908	-4.84372	1.27429e-06	8.65849e-05	1.1195	10.452	13.748	113.896	213.106	66.8584	8.3509	3.37529	29.4094	2.85902	16.9136	8.23514	50.0376	1.63826	6.31168	19.091
Hpcal1	4259.11	0.797766	0.164782	4.84134	1.28966e-06	8.71865e-05	6428.71	3705.13	3893.03	2918.35	3273.1	4938.07	4261.71	5581.42	3933.08	3821.51	4007.26	4676.49	3405.17	3628.61	4807	4867.07
Krt80	2618.52	1.38698	0.286539	4.84046	1.29536e-06	8.71865e-05	5122.78	2392.3	3464.4	1391.95	1300.36	2113.98	2034.47	3154.53	1970.97	2525.52	2913.84	3895.36	1960.41	2005.59	2342.14	3307.68
Areg	1457.12	3.85024	0.797558	4.82754	1.3823e-06	9.09128e-05	5676.38	786.107	970.871	220.568	73.0644	6068.8	446.172	1072.27	199.754	255.774	1064.06	3099.36	388.913	401.615	884.438	1705.82
Dscaml1	40.2994	-9.24637	1.91459	-4.82943	1.36923e-06	9.09128e-05	0	2.26544	2.86393	137.965	211.794	10.9249	9.95515	0	2.95203	147.02	0	0	37.228	67.0739	11.3951	3.35352
Mknk2	6288.34	0.780135	0.161559	4.82879	1.37362e-06	9.09128e-05	9376.52	6151.8	5836.68	4975.52	4587.33	6487.23	7098.93	7464.92	6829.02	4654.28	6411.38	7375.57	4536.27	6110.35	5949.14	6768.51
Pkd2	1640.16	-1.70479	0.352979	-4.82971	1.36729e-06	9.09128e-05	459.205	1127.64	1218.71	3691.91	2542.48	1397.24	1866.75	851.857	2417.33	1387.77	1751.62	1090.35	1601.27	1875.2	1709.09	1254.12
Snd1	8114.42	0.946946	0.196157	4.8275	1.38258e-06	9.09128e-05	8427.21	9895.43	8340.31	4573.73	4546.34	13356.9	6951.03	10474.8	7861.45	8327.23	6073.28	9894.25	5818.66	7721.95	8793.17	8774.96
S100a10	11390.5	0.945838	0.196036	4.82482	1.40126e-06	9.17184e-05	15832.4	11030.7	11560.7	9938.51	7497.46	11562.4	10904.8	18635.7	8673.42	7137.72	11806.1	15185.5	8341.47	9928.23	10018.4	14193.8
Fosl1	197.485	3.36843	0.698679	4.82114	1.42737e-06	9.25777e-05	271.28	74.7595	131.741	31.6353	37.9195	1121.99	74.2111	214.965	26.5682	19.1327	46.9784	567.263	32.4755	59.6212	118.334	330.88
Steap1	790.002	1.4977	0.310628	4.82152	1.4247e-06	9.25777e-05	757.165	981.291	903.243	292.935	330.459	1216.38	709.596	1121.17	460.604	798.998	477.762	1395.29	535.99	776.312	1002.57	880.262
Col27a1	755.852	-3.89651	0.809509	-4.81342	1.48368e-06	9.57949e-05	8.39726	2199.97	315.031	2505.85	1906.35	910.965	684.604	173.934	871.959	383.584	331.005	128.734	314.355	523.542	167.942	667.411
Hk1	7288.2	1.05427	0.219087	4.81212	1.49336e-06	9.59853e-05	12992.4	7438.32	7463.2	4672.41	4390.75	11180.2	7348.1	6983.48	5438.28	5572.76	6152.66	10003.5	5369.55	6549.57	6761.71	8294.28
Mtus2	421.133	-3.87854	0.807896	-4.80079	1.58041e-06	0.000101125	64.1545	175.083	1176.68	131.211	1340.01	251.581	118.997	54.3224	128.982	307.81	203.812	70.8172	1312.43	1007.41	147.596	247.239
Fam227a	50.9633	-2.18622	0.456379	-4.79036	1.66479e-06	0.000106044	13.7582	36.2299	59.9917	98.5604	123.483	11.6067	36.8967	25.5507	63.1122	58.1035	51.9563	20.8368	56.1993	69.6653	53.4595	36.0027
Tmem2	2850.06	-0.932412	0.194679	-4.78948	1.67214e-06	0.000106044	2178.89	2247.07	2801.66	4086.37	4532.48	1639.08	2848.09	2184.78	3615.1	3349.67	3055.86	1743.68	3037.16	2980.89	2717.2	2582.9
Rragb	18.7484	-4.50092	0.940435	-4.78599	1.70143e-06	0.000107423	4.69815	16.7592	15.8124	54.5572	41.5806	7.7553	10.7074	2.01849	34.4408	27.5839	3.49844	0	54.6405	11.4171	4.56931	9.93526
Birc2	910.61	-0.656459	0.137236	-4.78344	1.72323e-06	0.000107845	785.221	779.716	742.369	1349.94	1211.25	771.7	978.38	792.753	1051.54	981.069	905.738	754.491	1115.95	888.442	789.445	671.755
Vps37b	2269.9	1.53817	0.321526	4.78396	1.71873e-06	0.000107845	5103.86	1542.76	1602.84	1152.05	1469.61	4202.82	1760.25	2763.84	1443.54	1437.97	1834.51	4407.73	1603.97	1418.49	1762.74	2811.36
Atf5	912.726	1.62959	0.340965	4.77936	1.75853e-06	0.000109574	1068.08	753.287	854.688	356.409	382.262	1512.35	862.559	1350.43	756.881	948.745	555.216	1867.37	646.283	551.436	875.589	1262.05
Cirbp	765.235	-1.2509	0.261793	-4.77819	1.76876e-06	0.000109732	389.276	788.805	593.259	1180.64	1564.85	710.282	741.406	659.631	944.966	566.771	663.539	493.804	937.075	691.601	710.806	607.045
Adrbk1	2832.79	0.860964	0.18031	4.7749	1.79793e-06	0.000110267	4615.22	2182.35	2698.74	2467.46	2216.88	3045.25	2761.18	4291.82	2784.66	2783.1	2194.12	3178.56	1970.12	2733.88	2594.91	2806.34
Nudt21	803.575	-1.12081	0.234694	-4.7756	1.79169e-06	0.000110267	318.597	883.521	660.612	1040.45	1104.29	659.866	921.304	628.688	961.376	973.754	894.939	497.499	1009.91	911.708	746.82	643.875
Pdcd5	1087.93	0.733928	0.153715	4.77461	1.80056e-06	0.000110267	1444.33	1088.53	1078.91	987.803	823.319	969.41	986.765	1733.82	860.726	1068.37	1063.25	1281.98	872.843	932.229	1025.75	1188.81
Ivns1abp	3285.03	-0.793804	0.166386	-4.77087	1.83436e-06	0.000111857	2916.28	3362.16	3000.39	5099.06	4739.71	3417.47	3232.7	2572.63	3148.42	2828.64	2841.99	2614.94	4206.7	3354.95	3029.5	2194.93
Cebpa	445.935	-2.61777	0.549853	-4.76085	1.9278e-06	0.000116559	130.909	434.964	168.017	627.433	1096.89	558.264	864.288	162.077	589.421	357.479	184.39	125.804	848.322	414.036	392.694	179.972
Nr2f1	84.5633	7.2224	1.517	4.76098	1.92656e-06	0.000116559	78.1227	5.17041	99.2995	0	3.03742	2.69096	98.62	181.687	9.0192	39.9025	285.05	204.127	0	108.638	21.7087	215.939
Zbtb33	695.998	-1.05394	0.221454	-4.75918	1.94384e-06	0.000117032	501.397	504.434	542.696	1160.16	773.088	377.949	714.184	372.138	894.289	952.831	950.45	490.106	891.684	885.742	725.745	399.072
Dusp16	1860.15	-1.16073	0.243994	-4.75721	1.96291e-06	0.000117191	1258.93	1335.12	1483.74	3640.12	3507.44	1442.55	1785.05	1163.25	2209.21	1528.62	1699.46	1662.8	1986.6	1776.91	1992.86	1289.75
Lsm11	267.474	0.981684	0.206328	4.75787	1.95645e-06	0.000117191	296.228	355.788	269.361	145.531	180.896	406.918	236.3	317.809	248.047	198.85	194.564	426.016	201.17	264.812	240.722	296.569
Dhx9	6900.11	-0.942447	0.198287	-4.75295	2.00467e-06	0.000118917	4962.01	7467.8	7572.89	9935.71	8874.38	4010.43	7510.47	4249.49	6804.38	8178.72	7174.34	4629.45	7785.59	8059.11	7460.27	5726.66
Ldha	42632.1	1.8279	0.38467	4.75187	2.01548e-06	0.000118917	96215.9	34590.1	41049.5	11850.8	19780.2	83514.1	35449.7	56710.4	22985.8	42148.7	22682.6	63312.8	29277.2	30072.7	37184.4	55288.3
Plagl1	345.639	-2.07587	0.436901	-4.75135	2.02059e-06	0.000118917	70.3205	238.556	318.426	529.996	315.119	164.165	400.943	139.475	361.808	852.326	301.215	147.453	665.906	332.471	547.844	144.199
Srek1ip1	513.962	-0.840152	0.176841	-4.7509	2.02514e-06	0.000118917	375.09	513.417	519.914	602.916	673.43	419.944	554.519	333.774	622.587	412.763	554.113	394.956	696.643	576.012	591.423	381.893
Fam132b	486.067	1.95603	0.411798	4.74997	2.03444e-06	0.000118973	698.029	656.154	737.83	221.331	161.634	475.871	243.435	931.404	231.385	373.967	665.454	628.707	198.779	511.262	394.683	647.148
Abca5	325.772	-1.58873	0.33461	-4.748	2.05435e-06	0.000119009	190.886	325.588	273.263	445.542	532.573	495.83	357.177	103.241	317.049	256.779	479.728	138.416	317.026	376.27	348.331	254.659
Kdm5d	437.312	-4.89938	1.03185	-4.74814	2.05299e-06	0.000119009	17.5754	31.3675	722.535	998.756	816.207	15.9974	1080.54	44.7364	21.3473	1089.65	59.2458	40.0954	1250.66	41.1779	751.576	15.5174
Tceal8	148.154	-9.50101	2.00129	-4.74744	2.06007e-06	0.000119009	0	282.261	1.87035	131.708	316.091	191.239	0	0	9.63944	252.596	157.364	1.12036	445.15	235.244	169.943	176.235
Teddm2	33.5892	-2.46563	0.519714	-4.7442	2.09328e-06	0.00012044	20.1407	52.0411	17.817	60.7692	86.4191	24.6817	9.77886	8.37931	30.9307	37.5878	27.6879	14.6045	83.9049	19.5218	26.6914	16.4707
Pold2	1084.74	1.00366	0.21191	4.73624	2.17719e-06	0.000124765	1219.47	1569.25	1302.05	635.404	655.882	1640.67	841.272	1500.84	664.363	1008.17	851.794	1463.08	795.654	875.103	861.355	1471.48
Atp2c2	1739.15	1.66663	0.352006	4.73467	2.19416e-06	0.000124842	2025.14	2047.96	2023.84	325.14	742.667	1271.66	2355.75	2414.09	1249.69	2458.05	1921.42	1863.05	917.234	1980.75	1952.95	2277.04
Onecut1	56.1542	-4.94466	1.04439	-4.73449	2.19604e-06	0.000124842	4.38866	21.0123	12.3962	119.814	405.619	91.1973	9.35133	5.87617	3.38919	45.7656	7.6253	8.48621	57.3042	66.0522	12.1952	27.9939
Incenp	967.376	1.37366	0.291002	4.72044	2.35336e-06	0.000133254	845.385	1432.89	1069.2	566.798	457.808	1137.29	792.792	1845.12	655.35	1094.59	642.43	1292.35	514.063	1098.85	886.191	1146.9
Pgp	1310.02	1.55091	0.328798	4.71692	2.39441e-06	0.000135043	2949.39	1375.12	1305.95	585.252	726.019	1679.16	994.61	1542.29	753.751	1910.25	1101.64	1635.46	778.619	1001.97	1228.05	1392.83
Sgcb	543.575	1.84005	0.390784	4.7086	2.4942e-06	0.000139568	746.021	969.608	480.185	223.204	183.123	289.511	588.259	988.669	445.756	431.996	348.815	1005.29	358.814	417.349	723.153	497.438
Zfp266	1082.81	-1.12333	0.238534	-4.70929	2.48578e-06	0.000139568	526.588	978.276	894.878	1775.49	1393.47	773.057	1121.41	621.609	1326.91	1536.28	1143.55	834.385	1155.36	1370.87	1137.45	735.294
Twsg1	1845.47	-0.977979	0.20776	-4.70725	2.5108e-06	0.000139948	1542.51	1735.33	1595.21	2738.21	2601.65	1197.37	1867.04	1122.6	2131.36	2740	2367.71	1064.76	1999.22	1921.96	1650.54	1251.98
0610007P14Rik	2543.17	1.36427	0.290001	4.70436	2.54658e-06	0.000140298	4221.8	3273.15	3146.37	1281.15	1346.4	3194.19	1874.31	3115.27	1437.26	2839.21	1637.14	3173.54	1454.13	1826.03	3105.98	3764.88
Prelid1	2592.3	0.670611	0.142548	4.70446	2.54535e-06	0.000140298	3296.37	2860.12	2743.64	1776.85	2054.13	3729.77	2215.47	3099.08	2054.61	2038.14	2163.36	3288.07	2251.1	2233.31	2632.28	3040.52
Zfp704	983.921	-2.49622	0.53047	-4.70569	2.53014e-06	0.000140298	41.6176	654.478	745.704	1981.03	1514.87	1044.36	1394.52	351.131	1553.5	1117.77	1118.28	422.45	1135.36	809.059	997.393	861.211
Ppp1r11	1326.85	0.734884	0.156241	4.70354	2.55684e-06	0.000140322	1670	1446.96	1439.77	1094.81	1071.68	1717.91	1195.21	2016.28	987.756	1156.88	1084.07	1579.72	999.801	995.563	1219.99	1553.24
Stra6l	40.089	-5.31244	1.13055	-4.69898	2.61465e-06	0.000142944	0	17.3433	16.9368	66.5856	144.573	39.1348	65.3349	2.42767	11.3379	84.6412	128.613	2.67644	14.7492	10.1008	8.32591	28.6428
Mllt6	2990.67	-0.703111	0.149678	-4.69748	2.63393e-06	0.000143449	1976.31	2717.99	2558.76	3202.65	4014.77	2861.38	3229.85	2316.91	3128.69	3376.36	3250.55	2442.83	3756.82	3570.56	2758.01	2688.27
Acot1	72.0037	-4.14015	0.881647	-4.69592	2.65403e-06	0.000143994	0	13.5926	46.7775	102.815	188.673	15.2949	121.272	18.7668	148.585	39.2724	18.7914	4.57471	142.575	65.4177	195.47	30.1816
Kansl1	2054.06	-0.629917	0.134167	-4.69502	2.66587e-06	0.000144088	1693.01	1681.9	1962	2912.21	2385.16	1811.04	1924.33	1450.24	2335.99	2414.85	2220.04	1807.24	2359.52	2335.5	1877.68	1694.25
Ncapd3	158.733	-2.87782	0.613645	-4.68971	2.73596e-06	0.000147318	0	102.86	155.278	305.161	250.109	97.0264	162.558	51.074	193.597	257.243	168.765	65.0517	311.421	169.396	116.335	133.857
Glul	5434.59	-2.34659	0.500878	-4.68496	2.80016e-06	0.000150208	3565.07	6996.42	1967.74	8054.48	17319.9	4253.17	2944.09	1367.9	6430.75	5974.88	2269.06	2706.26	13469.6	3737.17	3882.32	2014.55
Adipor1	6315.47	0.49153	0.105067	4.67827	2.89309e-06	0.000153975	8327.68	6610.14	6411.85	5318.96	5169.84	7541.05	6248.14	6883.83	6131.57	5918.78	6330.61	6821.78	5176.22	5876.92	5593.99	6686.09
Fkbp11	244.888	1.77168	0.378822	4.67682	2.91354e-06	0.000153975	384.84	295.64	208.112	74.6944	119.308	604.149	191.863	295.151	157.441	79.5518	113.923	438.028	133.07	140.772	309.422	372.24
Myzap	1064.89	1.29384	0.276644	4.6769	2.91245e-06	0.000153975	2033.93	939.115	923.241	687.659	848.193	727.048	1040.66	1945.6	706.722	1002.22	1589.95	1422.56	667.94	949.138	705.521	848.686
Prss16	291.154	1.13825	0.243277	4.67882	2.88527e-06	0.000153975	439.233	242.371	318.981	193.425	174.768	399.764	315.794	362.422	271.624	250.495	229.106	298.996	131.367	272.243	359.787	398.083
Zfp36l1	3906.67	-0.960721	0.205583	-4.67316	2.96599e-06	0.000156169	2385.94	2843.81	4152.03	5007.24	6561.8	3367.62	3860.17	3127.59	3698.3	4101.8	5281.88	2600.31	4229.85	3346.54	4283.44	3658.46
P2rx4	1175.06	3.25691	0.69746	4.66968	3.01674e-06	0.000158257	8834.14	786.846	835.782	517.684	350.443	1145.79	702.533	730.122	731.448	282.491	826.63	967.994	233.467	607.658	561.224	686.637
Cdkn2a	8596.21	1.19218	0.255836	4.65994	3.16306e-06	0.000163449	11815	9921.96	9659.52	4720.16	5718.8	5817.45	7623.41	14230	5952.07	6604.18	8425.42	10163.5	5407.92	9047.05	9961.69	12471.3
Fras1	48.2236	-3.6179	0.776615	-4.65855	3.18444e-06	0.000163449	6.30885	20.389	27.6846	211.78	32.3703	25.1274	14.4802	9.3834	25.5842	136.95	73.991	9.14941	64.1588	24.8422	24.5434	64.8346
Gab1	770.071	-0.990058	0.212432	-4.66059	3.15308e-06	0.000163449	335.946	511.989	722.664	1083.51	972.034	544.062	881.483	609.921	797.047	1055.32	950.138	605.005	1036.84	766.795	845.87	602.515
Gmfb	1762.31	-0.750765	0.161142	-4.65902	3.17716e-06	0.000163449	1347.71	1455.72	1589.51	2355.65	1880.98	1236.52	1988.79	1203.75	2741.85	2028.71	2106.87	1346.57	2318.53	1750.74	1605.49	1239.61
Shc2	352.892	-6.50605	1.39652	-4.65875	3.18136e-06	0.000163449	0	169.454	16.5759	1590.07	1912.33	547.217	377.124	16.8671	408.194	42.4385	29.4819	23.2859	171.509	146.28	168.396	27.0381
Star	68.0836	-1.59619	0.342441	-4.66122	3.14342e-06	0.000163449	44.1619	40.7779	56.3239	110.723	81.3882	38.2373	63.3509	44.3579	86.5928	89.6216	66.9442	27.4482	157.625	89.4318	54.346	38.0065
Nat8l	445.361	4.27317	0.91744	4.65771	3.19745e-06	0.000163528	160.876	794.036	546.055	7.03006	50.8676	71.0121	175.573	1369.12	94.4648	712.945	685.885	476.913	45.9409	483.594	505.769	945.691
Rapgef3	363.149	2.1258	0.456663	4.65507	3.23864e-06	0.000165044	254.586	214.065	478.527	71.3575	168.039	379.278	338.879	741.017	305.528	305.096	333.794	577.738	125.168	404.017	378.768	734.532
Ccdc30	45.9021	-3.79388	0.816979	-4.64379	3.4207e-06	0.000173701	2.20426	31.6984	21.7141	187.624	157.771	21.073	45.4642	16.2613	80.9695	11.3123	47.982	7.61032	25.3895	37.2118	22.1616	17.9854
Pmm1	1170.2	1.7549	0.37806	4.64186	3.45294e-06	0.000174716	704.811	1903.99	1070.98	394.219	605.1	1288.81	1391.81	2821.69	786.821	1016.6	789.723	1639.16	532.654	1098.95	1282.79	1395.12
Epha2	6753.1	1.652	0.355955	4.64105	3.46646e-06	0.000174781	13281.1	6885.95	6956.59	4037.27	3263.85	13862.4	4709.37	7505.87	3890.21	2255.05	6171.5	11640.7	3016.75	5059.87	5291.9	10221.2
Dnal1	282.806	-1.46509	0.315878	-4.63815	3.51536e-06	0.000176622	99.2848	209.965	260.786	572.075	466.219	285.494	260.173	187.672	347.394	285.498	286.027	170.761	240.974	254.642	285.881	312.05
Rps15	13046.6	0.59191	0.127671	4.6362	3.54875e-06	0.000177674	13783.9	16852.8	12149.8	9598.95	11442.7	19523.9	12141.6	17854.4	9740.42	9639.78	9267.07	15803.2	10439.9	10404.7	12721.4	17381.3
Vipr1	293.943	5.46054	1.17941	4.6299	3.65844e-06	0.000182145	2767.43	29.0625	118.472	11.9364	23.7295	34.3729	60.3173	17.3805	463.126	151.005	486.957	50.9198	28.6909	95.6074	46.9641	317.112
Wnt4	1759	-1.35123	0.291868	-4.62961	3.66359e-06	0.000182145	731.826	1114.6	1288.77	3092.35	3482.12	762.561	2037.19	1568.73	2019.19	1685.69	2137.52	1311.8	2652.69	1290.97	1729.43	1238.56
Habp2	66.766	-7.65638	1.65409	-4.62876	3.67865e-06	0.000182259	0	16.9009	0	133.684	462.567	117.942	5.30999	0	81.2704	18.1768	0	5.24817	205.063	3.23904	10.3325	8.52209
Nos2	4309.31	1.75689	0.380032	4.62301	3.78209e-06	0.000186736	8444.39	4362.1	3870.12	1768.94	2390.78	5204.64	5150.43	5221.44	2006.39	4148.78	5181.72	7680.93	2156.05	2758.31	1981.88	6622.07
Tmem108	42.536	-6.54902	1.41714	-4.6213	3.81336e-06	0.00018763	0	18.3531	13.4054	179.068	119.576	157.894	19.5515	1.84286	14.8807	3.26316	52.0136	1.23537	14.5451	58.4791	4.73414	21.7344
Exoc2	939.995	-0.670881	0.145318	-4.61664	3.89997e-06	0.000190932	605.189	898.939	872.455	1238.58	1202.68	938.164	995.066	769.073	983.508	896.616	946.269	861.393	1127.78	989.003	971.747	743.457
Hmgcr	8513.89	1.42557	0.308815	4.61626	3.90722e-06	0.000190932	16421.4	9691.04	10903.1	4126.56	2727.09	13183.6	7856.72	8860.73	4963.95	5796.4	5895.66	11032	6663.29	7743.15	9140.04	11217.5
F3	8690.74	1.55399	0.336789	4.61414	3.94719e-06	0.00019189	18574.8	8060.43	9679.11	5620.53	5279.13	15633.6	5623.75	11809.4	4055.1	3637.23	7861.84	14699.7	4453.89	7093.27	5822.92	11147.1
Lss	3938.61	1.95782	0.42434	4.6138	3.95371e-06	0.00019189	8277.37	5603.43	3853.45	1243.81	838.177	8391.8	2604.36	3867.34	2318.99	3657.27	1628.89	6091.71	2610.18	2512.89	3848.41	5669.63
Psat1	2426.01	2.2974	0.498324	4.61025	4.02187e-06	0.000194536	3265.95	2181.59	2446.88	984.584	469.299	7778.5	1177.1	3827.01	1126.72	1600.56	710.966	5370.93	1081.88	1097.31	2457.23	3239.67
Tuba1c	10673.3	1.026	0.222601	4.60913	4.04363e-06	0.000194928	18238.9	13900.7	12140.2	8858.75	6868.05	12895.8	7412.06	14804.5	5826.32	9213.91	8065.02	14082.1	7413.91	7826.94	9387.84	13837.7
Mvd	2998.76	1.88747	0.409795	4.60588	4.10734e-06	0.000197332	5108.59	3842.18	3647.69	873.485	901.744	4626.71	2228.14	4495.5	1313.65	4116.55	1590.22	4081.78	1923.18	2331.85	3120.51	3778.29
Cox4i1	8633.78	0.422469	0.0918387	4.60012	4.22252e-06	0.00020208	10563.8	9170.35	8756.15	7158.55	7834.6	10581.2	8389.06	9907.05	7916.67	7917.09	7322.45	9374.96	7273.74	7655.79	8411.87	9907.2
Vgll4	1609.19	-0.804426	0.174893	-4.59953	4.23449e-06	0.00020208	927.468	1484.51	1403.22	2176.31	2290.35	1596.97	1896.32	1252.23	1628.15	1679.85	1578.18	1326.05	1666.44	1610.47	1749.65	1480.92
Fgfr2	2015.62	-2.86585	0.623558	-4.59596	4.30768e-06	0.000204888	93.91	360.85	1163.98	4793.34	3891.95	983.844	1704.17	946.66	1969.29	4588.17	2818.49	512.235	2691.34	2920.16	1526.58	1284.96
Ank	101.241	-2.68449	0.584615	-4.59189	4.39259e-06	0.000208232	55.8422	30.0785	77.4577	316.315	120.067	67.6908	16.0213	40.2698	127.119	54.965	60.6412	42.9025	452.214	61.0801	54.3109	42.8759
Rtf1	1435.16	-0.523541	0.114146	-4.58658	4.50567e-06	0.000212321	1059.08	1337.6	1436.69	1802.78	1619.14	1124.39	1462.63	1220.27	1677.95	1666.05	1628	1159.01	1528.28	1641.45	1378.5	1220.7
Tbc1d14	2421.07	-1.01541	0.221394	-4.58644	4.5086e-06	0.000212321	1919.15	2291.82	1906.3	4303.14	4218.81	1896.31	2806.77	1772.27	2443.3	1929.66	2075.17	1742.69	2462.67	2468.59	2584.55	1915.89
D230025D16Rik	527.109	-1.2309	0.268543	-4.58364	4.56945e-06	0.000213804	272.626	529.698	435.291	768.025	817.128	635.612	482.754	266.519	741.1	721.914	412.351	412.903	646.073	418.435	486.193	387.125
Pdzd11	1077.96	0.752453	0.164162	4.58361	4.57006e-06	0.000213804	1568.9	1156.39	1323.75	832.341	858.171	1049.95	1056.86	1345.92	910.952	773.681	1129.1	1264.85	788.871	1042.73	1023.91	1121.05
Chsy3	94.9494	-5.00486	1.09277	-4.57997	4.65049e-06	0.000216856	18.9265	180.102	136.514	213.538	299.656	8.73995	109.507	0	132.841	70.4889	21.1403	1.14368	93.4659	57.9651	49.9633	125.198
Acsbg1	1581.68	2.89908	0.633218	4.57834	4.68689e-06	0.000217841	301.993	2403.05	1332.79	161.765	495.836	2493.68	1344.56	4008.53	670.754	827.268	627.336	4216.3	485.141	847.363	1277.17	3813.38
Ly6f	15.9208	7.39129	1.61616	4.57335	4.79989e-06	0.00022165	131.767	8.63969	23.8194	0	0.965836	13.6907	0.945105	9.79908	1.0276	6.13712	7.83831	17.3466	0	6.05329	9.19297	17.5104
Mdh2	7430.69	0.630768	0.137904	4.57398	4.7855e-06	0.00022165	9710.47	8193.95	8167.76	5944.45	5847.67	9204.63	6540.32	9118.71	5769.94	6275.22	5344.6	8701.22	5986.48	6572.07	8982.12	8531.45
Gm10184	33.2143	-22.192	4.85764	-4.56848	4.91272e-06	0.000226128	0	0	0	0	182.198	0	0	0	0	265.844	83.3867	0	0	0	0	0
Inha	17.9804	-7.01587	1.53616	-4.56714	4.94412e-06	0.000226841	0	13.5926	3.81857	29.8777	47.1681	29.4973	0	0	12.7921	78.5448	50.5018	0	5.54459	4.14036	4.38275	7.82487
S100a16	7338.79	1.49181	0.327062	4.56126	5.08475e-06	0.000232546	14375.9	9398.87	7269.93	2817.34	3559.96	8704.55	5740.36	10755.3	4604.01	4938.38	9062.7	10460.3	6276.7	4293.27	5832.06	9330.96
Gm9892	294.472	2.90735	0.637694	4.55916	5.1358e-06	0.00023413	1421.07	157.448	260.617	97.542	36.0697	245.811	203.628	377.895	110.209	175.215	475.656	449.465	165.546	173.895	266.471	95.0163
Spdef	232.244	5.72398	1.25984	4.54341	5.53512e-06	0.000251531	1489.61	706.981	185.476	15.7771	3.40427	67.5946	131.201	12.7628	37.8455	347.428	130.923	10.2667	10.2756	122.194	190.175	253.991
Ankrd9	375.463	1.05455	0.232178	4.542	5.57223e-06	0.000252413	755.164	369.455	400.344	232.024	245.65	316.311	368.073	436.599	326.398	326.495	401.082	443.277	305.094	312.237	402.129	367.071
Gm3336	220.536	3.17293	0.699191	4.538	5.67894e-06	0.000256433	1351.67	127.997	210.021	35.1503	55.4919	226.146	123.987	102.364	232.226	190.32	172.646	303.074	103.763	67.902	109.569	116.255
Kctd11	1518.5	1.78125	0.393543	4.52617	6.0061e-06	0.00027035	2755.39	839.345	1559.88	604.585	789.835	3502.54	1196.43	2034.49	1046.99	905.279	653	2740.25	796.045	984.578	1431.4	2455.89
Mbtd1	876.612	-1.00512	0.222105	-4.52545	6.02666e-06	0.000270423	440.583	814.357	777.609	1141.18	1052.4	607.119	817.456	459.22	1232.47	1135.11	1056.54	741.244	1092.56	1110.82	935.716	611.413
Lrrc61	238.997	-1.96941	0.435471	-4.52249	6.11178e-06	0.000272528	43.8182	195.447	229.824	267.249	434.117	258.088	176.089	166.546	291.276	357.781	150.243	107.533	548.944	201.298	215.133	180.563
Rpsa	2873.61	1.11537	0.246623	4.52256	6.10951e-06	0.000272528	3004.59	4586.38	2571.81	1161.72	1771.12	4604.86	2681.56	4340.25	1776.14	2549.68	1625.45	3961.69	2286.75	2329.37	2414.89	4311.5
Zbtb14	377.939	-0.59667	0.131998	-4.52031	6.17502e-06	0.00027449	297.507	341.79	328.491	460.812	507.215	298.918	377.869	305.908	457.873	427.775	451.604	344.939	467.527	374.161	337.047	267.586
Fdft1	5903.94	1.33834	0.296596	4.51233	6.41194e-06	0.000284137	9261.39	6666.05	6673.9	3295.34	2075.4	6828.09	6403.88	8978.21	4920.04	7049.9	3341.34	6310.81	4337.45	5117.49	6510.13	6693.62
Jmy	760.884	-1.36035	0.301851	-4.50669	6.58475e-06	0.000290891	280.744	624.128	503.096	1425.34	1053.42	747.266	814.512	500.732	958.424	688.777	832.692	567.263	991.689	911.708	795.907	478.435
Slc12a7	1323.4	-1.23021	0.273145	-4.50386	6.67308e-06	0.000293883	1367.44	1296.96	926.003	2267.19	2335.29	1289.14	943.024	720.816	816.727	1006.98	1458.68	1097.93	2862.59	1085.6	744.19	955.752
Uts2b	80.6147	-3.9343	0.874954	-4.49658	6.90558e-06	0.000303187	0	49.8397	32.4578	375.229	233.066	25.1274	63.3509	32.4154	57.0725	16.1117	51.6762	10.2931	64.9509	153.193	73.6301	51.4206
Slc29a3	951.285	-1.18475	0.263836	-4.49049	7.10598e-06	0.000311028	450.883	869.593	794.898	1287.05	1491.95	578.915	1165.04	573.621	1478.2	859.231	961.992	688.817	1119.74	1176.25	944.017	780.375
Ar	58.7511	5.32778	1.18746	4.48672	7.23287e-06	0.000314807	67.8201	133.661	5.72785	1.75751	5.54919	198.834	22.6253	34.1215	9.84009	1.00698	54.0252	349.965	3.96042	24.0141	19.2841	7.82487
Myc	2584.42	1.20402	0.268359	4.48661	7.23644e-06	0.000314807	4033.88	2757.75	2471.56	1786.5	1748.44	4269.88	1826.72	4151	1146.29	1906.04	2631.39	3710.52	1628.56	1947.54	2367.39	2967.33
Nkain2	45.1157	-3.60846	0.804554	-4.48504	7.29007e-06	0.000315675	8.55122	35.4831	60.6084	29.6451	159.617	15.7952	52.0498	3.59717	38.5308	10.3126	67.5463	11.0235	91.2659	16.9607	100.825	20.0389
Nradd	181.53	-3.19231	0.711817	-4.48473	7.30063e-06	0.000315675	31.5442	190.297	47.7321	485.074	344.975	119.082	153.852	48.6231	473.308	132.922	105.701	21.7299	105.347	298.106	248.94	97.2519
B3gnt7	263.513	4.40236	0.981991	4.4831	7.35672e-06	0.000317139	1693.05	7.99989	58.9993	15.5157	39.9206	112.061	129.185	239.528	241.68	478.258	620.638	61.7066	38.7808	93.9316	74.8103	310.14
Ulk1	1679.14	-0.998244	0.22279	-4.48065	7.44152e-06	0.000319828	1167.14	1405.7	1278.27	2571.24	2728.35	1292.42	1765.68	1232.64	2180.56	1643.4	1358.85	1211.15	1915.26	2028.78	1935.42	1151.37
Pgrmc1	2865.28	-0.750487	0.167584	-4.47828	7.52458e-06	0.000322427	2856.33	2066.08	2871.56	4483.42	3590.33	2440.63	2601.01	2423.48	3531.61	2562.77	2757.63	2052.9	4255.87	2716.91	2592.83	2041.17
Arf6	3923.55	1.01985	0.227971	4.47359	7.69161e-06	0.000327538	7099.03	3496.7	3610.46	2740.84	2576.67	5479.95	3404.66	4224.24	3052.39	3246.52	3631.43	5423.31	2938.63	2755.83	4202.18	4893.9
Mdm4	1033.72	-0.642949	0.143754	-4.47258	7.72828e-06	0.000327538	788.449	866.603	930.208	1110.81	1184.31	1025.11	1099.6	778.471	1316.02	1405.58	1170.68	785.131	1376.85	934.332	811.433	955.976
Syn3	59.6594	-2.26135	0.505627	-4.47237	7.73568e-06	0.000327538	17.523	55.7542	33.5592	57.9418	152.983	110.508	48.4717	23.2234	90.5252	51.6858	56.622	17.9571	76.1325	68.3531	55.4158	37.8948
Tspan13	1024.94	3.1809	0.711098	4.47323	7.70479e-06	0.000327538	5111.74	1291.3	1123.61	471.014	74.9141	1467.22	592.784	467.464	516.605	723.015	465.086	789.137	156.041	907.568	941.414	1300.05
Kcnn3	34.7462	-4.94144	1.10575	-4.46887	7.8635e-06	0.000330986	3.06466	51.3468	1.86877	162.731	66.2045	60.0027	19.9305	2.21003	7.69078	76.591	31.9742	3.72032	41.9503	18.8558	5.62615	2.17206
Samd14	262.042	-2.23222	0.499494	-4.46896	7.86009e-06	0.000330986	31.2034	140.06	109.542	719.75	626.688	204.251	221.123	194.079	336.986	317.966	347.37	118.101	280.061	198.229	172.549	174.71
Hs3st1	2163.16	1.83093	0.410006	4.46562	7.98356e-06	0.000335051	4032.84	1615.22	1909.74	574.374	1219.54	5012.3	2093.26	2427.71	1632.37	1046.73	2424.24	3539.24	1016.91	1692.38	1659.09	2714.63
Zc3hav1l	156.59	-1.36388	0.306064	-4.4562	8.34233e-06	0.000349081	45.7391	118.936	121.24	286.475	211.794	121.267	144.802	109.189	215.498	265.844	199.658	107.506	186.932	144.085	143.754	82.72
Crebl2	606.607	-1.00797	0.226717	-4.44592	8.75149e-06	0.000364067	524.633	441.409	378.657	1005.67	995.906	710.452	547.997	414.233	600.011	628.107	493.418	465.768	820.006	557.765	607.829	513.849
Otop1	22.5916	6.87188	1.54565	4.44595	8.75047e-06	0.000364067	196.04	16.1108	4.18792	0	0	0	0	38.825	4.66521	6.6838	2.22726	50.1726	2.31653	18.1634	4.09239	17.9808
Uck2	2546.9	1.11253	0.250331	4.44424	8.82012e-06	0.000365855	3140.64	3170.33	3143.68	1174	1451.36	3245.45	2160.47	3322.11	1598.81	2563	1622.1	3574.83	2017.18	2195.19	3123.51	3247.76
Ddost	7733.78	0.981594	0.221076	4.44008	8.9927e-06	0.000370858	12807	8868.06	9060.51	4915.77	5781.33	10160.2	7644.65	8100.44	7861.24	4816.41	5705.53	9086.51	4490.33	6868.03	8495.51	9079.08
Usp40	1197.74	-0.748689	0.168605	-4.44049	8.97548e-06	0.000370858	895.578	1070.29	1105.45	1645.8	1607.51	1062.1	1395.56	834.823	1353.28	1110.07	1054.62	1121.05	1536.18	1369.67	1157.92	843.996
Rpl28	10870.5	0.734765	0.16557	4.43778	9.08904e-06	0.000373751	11170.4	13506.9	9597.69	7016.17	8755.39	16452.6	9714.54	15563.3	9030.87	9752.38	7521.25	13839.2	8613.02	8925.67	10777.2	13692.2
Ldoc1l	370.291	-3.37848	0.761511	-4.43655	9.14123e-06	0.000374817	3.15442	286.578	384.721	957.845	892.495	361.615	158.377	49.4761	340.467	163.131	533.205	180.701	583.766	198.737	362.015	468.374
Msmo1	9237.94	1.85156	0.417406	4.43588	9.16982e-06	0.000374912	23879	10123.9	10626.1	3278.95	2561.91	13752.7	7550.18	10116.3	5267.93	10785.3	5432.81	11747.4	6832.8	7547.12	9165.36	9139.21
Polr3f	551.442	-0.987423	0.222805	-4.43179	9.3454e-06	0.000380998	323.997	597.844	518.76	799.958	506.91	424.186	495.2	287.233	615.823	777.648	651.649	397.052	688.774	564.055	679.477	494.497
Tubb4b	13201.5	1.21358	0.273883	4.43102	9.37891e-06	0.000381275	27297.9	16833.6	18039.3	9041.65	7119.18	17416.6	9781.25	15663.8	8402.82	10082.8	10267.2	15105	8875.23	9970.96	11583.5	15743.8
Bsg	37012.2	1.04374	0.235648	4.42924	9.45638e-06	0.000382538	62684.2	38291.9	38114	18691.3	25514.3	63870.9	36943.9	37862.4	32233	34362.6	30085.3	37671.1	22837	34336.9	34170.1	44526.7
Nans	3374.37	0.946158	0.213654	4.42847	9.4904e-06	0.000382538	5526.68	4256.69	3592.47	2393.12	2603.16	3853.61	3251.93	3831.54	2888.1	1965.5	3201.73	3857.44	1861.37	3064.42	3306.93	4535.23
Pdlim4	432.84	-3.08846	0.697394	-4.42858	9.48556e-06	0.000382538	31.9224	553.372	228.256	1361.04	1054.18	114.778	606.866	170.927	347.822	260.644	133.768	233.573	1306.54	195.79	210.716	115.246
Cars	2713.5	1.59545	0.360383	4.42711	9.55057e-06	0.000383879	3664.11	1792.54	2469.17	1528.18	1332.78	6592.92	2053.21	3830.74	1583.75	2112.37	1700.62	5465.14	1427.93	1625	2381.24	3856.26
2310030G06Rik	623.553	-0.878806	0.19864	-4.42413	9.68337e-06	0.000388124	649.811	429.301	493.55	994.753	974.808	405.315	741.206	458.081	584.501	616.274	699.978	418.586	828.52	661.63	589.041	431.486
Ankrd37	574.022	2.85465	0.645636	4.42145	9.80426e-06	0.000390774	1810.04	205.835	396.87	117.837	149.743	1961.77	520.637	615.77	204.284	375.655	125.899	1276.4	243.595	311.441	381.55	487.017
Cys1	40.3721	-7.01338	1.58603	-4.42197	9.78061e-06	0.000390774	0	16.5062	5.49399	240.538	111.947	191.16	7.26958	0	18.0921	0	11.3677	2.53316	7.47995	18.3801	5.79652	9.38973
Idh3a	8.67061	-21.4537	4.85796	-4.4162	1.00453e-05	0.000399264	0	0	0	0	138.73	0	0	0	0	0	0	0	0	0	0	0
Cmtm3	657.706	-3.16297	0.71668	-4.41337	1.01775e-05	0.000403397	7.88606	296.772	408.587	1702.15	1874.7	195.556	940.309	264.441	808.855	502.485	465.086	227.592	914.857	746.093	630.239	537.68
Gm14548	140.738	-3.74111	0.847804	-4.41271	1.02085e-05	0.000403506	0	97.4139	161.334	132.692	382.894	91.7695	300.464	21.3259	347.355	41.2864	50.5018	27.4482	148.912	182.176	145.507	120.727
Gm14137	1630.24	1.13178	0.256519	4.41209	1.02376e-05	0.000403538	2914.69	1899.57	1697.35	777.7	1240.24	1350.32	1945.78	2079.7	1461.25	1670.59	951.313	2122.66	1228.52	1566.71	1525.2	1652.17
Ifnar1	2625.93	-0.686096	0.155588	-4.40969	1.03518e-05	0.000406329	1875.38	2304.04	2301.22	3207.92	3765.35	2359.53	3131.37	2002.95	3055.08	2736.17	2872.41	2046.81	2563.73	2734.7	2849.61	2208.66
Serinc1	3665.42	-0.76293	0.173023	-4.40941	1.03654e-05	0.000406329	2848.27	2941.52	3493.46	5182.65	4209.47	2791.65	4112.76	2743.46	4535.03	3089.81	4798.35	2826.87	4892.22	4207.27	3516.33	2457.53
Crp	217.98	-4.93235	1.11992	-4.4042	1.06175e-05	0.000415071	1.57727	65.7	57.2805	756.223	963.743	229.432	304.095	20.4736	441.835	36.2527	12.9195	38.8863	153.67	125.043	255.961	24.5933
Ice1	1749.56	-0.783201	0.177952	-4.4012	1.07656e-05	0.000417585	1104.05	1658.3	1707.85	2061.56	2284.42	1933.71	1830.84	984.404	1741.7	1735.03	1758.17	1686.92	2150.51	1888.83	1749.59	1717
Rhog	1853.44	0.719524	0.163487	4.40112	1.07696e-05	0.000417585	2785.97	2011.24	1724.73	1241.78	1591.93	1924.54	1835.74	2463.37	1488.92	1956.86	1625.94	2070.1	1609.36	1491.21	1692.48	2140.93
Tcf12	2095.68	-0.826795	0.187844	-4.40149	1.07508e-05	0.000417585	1141.47	1828.7	1934.86	2502.16	2646.09	1841.16	2096.1	1316.13	2370.15	2853.26	2676.42	1950.11	2672.75	2266.93	1925.03	1509.62
Copz2	25.3675	-3.63402	0.826131	-4.39884	1.08831e-05	0.000419704	0	21.8075	14.3993	88.5265	45.5216	43.1513	10.9988	7.44917	41.8561	12.2381	12.4893	3.63171	19.4931	21.0361	9.10362	54.1768
Slc29a4	147.034	-3.80501	0.864976	-4.39897	1.08765e-05	0.000419704	6.30885	158.581	43.9135	376.108	403.241	108.157	111.317	0.853037	148.585	241.676	176.169	57.1838	120.397	197.909	130.606	71.5417
L1cam	407.475	1.9612	0.446115	4.39617	1.10178e-05	0.000423755	988.457	386.812	292.692	199.744	67.2234	380.484	289.145	588.45	416.839	714.351	330.996	458.263	255.736	378.244	237.92	534.245
Amer1	797.137	-0.923266	0.210091	-4.3946	1.10976e-05	0.000425677	605.649	755.524	758.94	1317.26	911.917	554.987	786.457	458.934	797.047	963.684	874.973	611.867	944.957	874.445	692.474	845.086
Mrpl28	1554.93	0.664146	0.151202	4.39243	1.12088e-05	0.000426506	1836.61	1984.82	1733.39	1180.54	1283.58	1667.11	1377	2237.38	1193.34	1517.29	1175.22	1846.86	1274.99	1428.62	1464.36	1677.83
Oaz1	6876.06	0.61785	0.140654	4.39268	1.11963e-05	0.000426506	8605.36	8317.42	7308.52	4872.81	5637.98	6858.9	6581.67	9580.57	6220.94	5880.05	5717.33	7578.64	6279.15	5867.91	6785.85	7923.87
Zkscan8	276.45	-1.43388	0.326443	-4.39243	1.12089e-05	0.000426506	122.055	163.824	211.872	644.56	412.75	228.399	296.47	140.554	295.504	348.292	214.323	274.952	392.236	238.405	245.373	193.631
Ccdc157	485.158	-1.04522	0.238166	-4.38863	1.14067e-05	0.000432878	301.963	376.279	419.802	800.348	906.345	434.531	464.455	370.263	576.395	404.111	483.467	377.742	465.864	456.738	461.386	462.84
Rps6	13568.4	0.80415	0.183298	4.38711	1.14865e-05	0.00043475	14597.5	17585.6	12405.8	10601.3	10702.9	24549.5	12167.7	19309	9311.06	7474.95	8889.49	17568	8178.41	11107.8	14216.8	18428.9
Lgals3	22208.9	1.96703	0.448453	4.38625	1.15322e-05	0.000435324	50996.8	13095.2	23852.3	6887.6	7466.54	26872.2	26652.5	31290.2	17671.6	14139.9	34879.9	32765.5	15073.2	14283.8	11650.8	27763.7
Lpp	5472.54	-0.946638	0.215876	-4.3851	1.15933e-05	0.000436476	3647.44	5372.38	4147.43	7837.75	7575.67	4313.99	6381.7	3042.49	6335.96	6206.38	5371.97	4727.3	6589.77	6709.69	4995.16	4305.55
1700016C15Rik	731.965	1.052	0.239981	4.38365	1.16705e-05	0.000438228	1250.73	780.444	839.13	477.165	394.918	596.502	735.776	874.363	845.263	675.686	832.692	934.384	601.192	737.813	492.621	642.757
Cdkn2b	3996.45	1.35799	0.30992	4.38176	1.17725e-05	0.000440896	8803.99	3628.1	4337.89	2786.54	2425.92	4501.07	3626.39	5117.37	2770.97	2027.06	4545.16	4877.78	2120.41	5127.43	3264.27	3982.86
Nedd4l	588.777	-1.54323	0.352835	-4.3738	1.22101e-05	0.000456088	489.24	375.031	495.61	1551.12	853.381	509.457	523.653	242.352	547.685	483.542	686.155	352.165	744.218	659.692	666.488	240.64
Zfp618	1749.26	-0.896834	0.205082	-4.37305	1.22522e-05	0.000456466	1076.41	1241.94	2262.64	1972.85	1828.99	926.783	1807.75	1007.91	2081.4	1899.26	2354.3	1203.61	2319.06	2617.03	1898.12	1490.13
Pold4	643.315	1.18626	0.271585	4.36791	1.2544e-05	0.000465264	1209.72	472.344	531.736	388.411	503.127	963.58	559.298	1032.17	664.206	443.073	463.912	858.901	470.498	428.942	622.35	680.764
Uqcrq	2038.59	0.688869	0.157717	4.36775	1.25535e-05	0.000465264	2836.25	2209	2014.13	1662.39	1612.22	3087.31	1680.23	2551.41	1280.63	1685.88	1353.09	2786.56	1794.68	1648.03	1887.59	2528
Uty	140.866	-8.51029	1.94955	-4.36525	1.26979e-05	0.000469396	0	3.99612	238.208	400.797	230.925	0	366.409	2.08375	4.79927	314.091	0	0.673381	410.816	17.8807	263.18	0
Ddx3y	184.075	-8.90396	2.04496	-4.3541	1.33614e-05	0.000492647	3.49611	3.76624	274.893	379.39	464.813	3.63249	439.588	0	0	433.622	3.90503	0	617.17	1.83554	315.379	3.71676
Ehd1	2831.41	0.772301	0.177579	4.34906	1.36722e-05	0.000502807	3785.86	2892.95	2822.56	1957.07	2542.1	3346.62	2734.7	3923.89	2173.12	2281.99	3136.83	3468.32	2046.71	2193.15	2439.37	3557.33
Kbtbd7	292.706	-1.04305	0.239867	-4.34846	1.37098e-05	0.000502894	173.493	195.96	294.984	480.68	329.252	159.504	323.995	217.524	495.94	379.633	340.593	163.546	336.636	329.573	238.421	223.568
Uba1	17326.6	0.488625	0.112387	4.34771	1.37563e-05	0.000503305	20463.8	19581.8	17897.9	13614.7	15780.7	20221.3	16648.9	21143.9	14771.1	16327.9	12407.2	19609.2	14234.8	16229.3	16941.9	21351.2
Lce6a	55.835	-5.39624	1.24197	-4.34489	1.39346e-05	0.000505935	1.30571	0	13.1755	433.583	60.6317	9.94876	39.0377	0	100.159	13.8979	35.9747	13.8114	112.131	32.8574	7.56108	19.2849
Siah2	388.182	1.44866	0.333361	4.34562	1.3888e-05	0.000505935	585.017	327.272	394.163	224.142	251.062	871.962	275.616	597.525	174.81	310.073	213.229	649.713	196.381	231.977	306.305	601.667
Zfp397	654.82	-1.21597	0.279835	-4.3453	1.39089e-05	0.000505935	309.133	472.344	576.604	1237.29	846.252	424.98	711.341	464.052	1051.91	590.093	606.021	459.758	786.54	870.304	671.437	399.068
Nelfb	3030.95	0.45987	0.106077	4.33526	1.45588e-05	0.000527259	3818.36	2850.21	3055.09	2443.62	2731.85	3301.56	2726.82	3353.56	2999.38	3159.26	2889.72	3381.39	2493.83	2854.21	3226.46	3209.95
Myo7b	1550.64	3.60367	0.83147	4.3341	1.46358e-05	0.000528703	11297.6	536.909	1592.34	289.99	85.0876	392.205	564.728	1324.77	400.492	1232.55	1287.21	1484.49	784.955	2272.23	550.473	714.299
BC003965	12.9246	19.8733	4.5878	4.33178	1.47905e-05	0.000530267	0	0	13.365	0	0	0	0	0	0	0	1.17446	96.0688	0	33.951	62.235	0
Il5ra	19.4132	21.0471	4.85774	4.33269	1.47299e-05	0.000530267	0	72.494	0	0	0	0	0	0	0	1.00698	14.0935	223.017	0	0	0	0
Sc5d	4055.12	1.36915	0.316055	4.33199	1.47765e-05	0.000530267	9456.18	3549.57	4453.84	2064.49	1831.89	4437.83	3846.2	4703.04	2790.23	4142.79	4119.29	5086.37	3551.66	3743.41	4212.86	2892.29
Car5b	555.201	2.0173	0.466065	4.32836	1.50225e-05	0.000537235	517.113	774.573	432.372	105.664	226.611	305.876	765.591	1161.44	349.376	408.667	495.657	1112.34	357.238	477.842	535.351	857.5
Bfar	798.725	-0.594934	0.137591	-4.32393	1.53273e-05	0.000546762	605.95	732.599	692.284	882.995	995.507	685.685	882.09	665.738	1039.44	1086.96	866.835	589.601	936.092	753.928	741.022	622.876
Inpp5e	878.358	-0.846594	0.195917	-4.32118	1.552e-05	0.000552256	514.874	843.655	893.462	1091.84	1147.55	679.019	1046.18	660.331	1290.59	918.985	820.367	688.398	1116.13	801.216	824.304	716.834
Sil1	1434.39	1.15024	0.266436	4.31712	1.58077e-05	0.000561096	2656.02	1410.24	1430.05	733.762	984.982	2111.79	1329.46	1538.88	1560.64	977.782	898.462	1737.24	952.085	1262.81	1526.07	1839.96
Rpl21	12252.9	0.622448	0.144217	4.31605	1.58847e-05	0.00056243	15397.6	14095.1	11865.5	10233.6	9188.9	17115.8	10189.1	16318.4	9393.46	10175.4	9627.04	15273.3	11100.3	10451.9	13101.9	12519.8
Hsd11b2	158.546	-2.41355	0.560078	-4.30932	1.6376e-05	0.00057839	89.9011	97.4139	123.149	597.555	378.27	109.249	183.718	66.5369	171.218	125.873	196.135	42.316	80.0005	122.555	70.1239	82.72
Ppp1r9a	40.0887	-7.87538	1.82834	-4.3074	1.65187e-05	0.000581989	0	24.5935	0	78.529	31.0629	9.49918	1.12415	0.521179	1.83341	171.399	109.986	0	128.195	10.949	65.1059	8.62168
Pros1	82.6541	-2.61438	0.607286	-4.30502	1.66972e-05	0.00058683	6.07405	73.1915	65.5402	99.3677	130.727	61.7682	73.0976	27.5598	55.6347	28.4668	142.291	28.1885	153.544	143.799	120.358	112.859
Gpr56	8032.82	-1.42749	0.332029	-4.29929	1.71345e-05	0.000600717	2678.49	8143.16	6337.84	13922.9	14886.3	5361.61	6237.82	6253.02	8624.7	9792.69	7088.94	4741.8	7979.11	9210.03	8195.38	9071.16
Ubald2	2985.12	0.734689	0.17098	4.29694	1.73176e-05	0.000605648	4029.14	3233.71	2990.27	2541.56	2738.51	3586.07	2595.43	4211.51	2402.22	2264.25	3202.98	3952.1	2049.11	2287.35	2741.36	2936.3
Cdkn1a	1655.1	2.7798	0.648035	4.28958	1.7901e-05	0.000624522	6115.03	965.065	1095.61	321.123	790.443	5555.65	908.584	1931.28	340.413	1363.24	1340.02	1873.48	333.061	628.157	910.206	2010.27
Rabgap1	2248.25	-0.638215	0.148907	-4.28598	1.81932e-05	0.000633168	1734.79	1902.1	2043.87	2864.73	2559.96	1705.77	2441.56	1556.31	2453.39	2849.08	2475.47	1818.71	2524.96	2317.86	2284.02	2439.39
Sall2	392.367	-2.74095	0.640028	-4.28254	1.84768e-05	0.000641473	6.30885	340.949	274.937	574.707	585.44	302.621	150.232	143.31	560.885	983.824	476.831	101.787	533.865	473.658	314.681	453.842
Nsd1	2374.97	-0.898566	0.209861	-4.28173	1.85448e-05	0.000642272	2171.82	2522.57	2122.17	3431.55	2974.37	2056.07	2314.12	1509.02	3103.56	2388.57	2365.36	1579.42	3391.7	2210.13	2374.57	1484.49
Zfand2a	1631.03	1.6996	0.397237	4.27857	1.881e-05	0.000649878	3653.74	853.455	1780.79	878.181	898.393	2818.18	1720.52	1566.57	834.435	952.659	1349.08	2871.4	714.185	1248.55	1480.16	2476.23
Entpd8	955.43	2.45415	0.57407	4.27501	1.9113e-05	0.000657163	4458	558.537	1180.54	348.666	242.522	516.138	777.673	596.147	1188.38	799.956	1488.81	1022.76	517.316	663.201	500.823	427.423
Ppib	6915.7	0.659108	0.154166	4.2753	1.90877e-05	0.000657163	9460.11	7632.26	6934.52	4983.43	5790.58	9700.25	6175.81	7928.98	6308.48	6679.33	5198.16	7501.37	4986.17	5685.55	6965.94	8720.26
Dcxr	1157.48	1.42409	0.333187	4.27413	1.91883e-05	0.000658166	1388.18	1266.2	987.206	402.539	735.789	1260.01	1577.04	2229.15	940.44	1260.37	1458.71	1639.83	821.377	792.519	891.804	868.431
Phf23	1897.54	0.499042	0.116774	4.27355	1.92384e-05	0.000658302	2380.81	1980.51	1953.74	1413.79	1783.63	1972.82	1863.87	2309.09	1674.47	1836.1	1972.16	2019.07	1548.78	1764.92	1808.95	2078
Fkbp5	1370.47	1.90323	0.445888	4.2684	1.96881e-05	0.000670476	5331.09	1185.42	1159.23	711.3	548.082	1276.67	656.603	1675.57	595.681	1098.42	1046.16	2254.49	1215.49	1266.51	606.451	1300.29
Ndufa2	1868.78	0.562956	0.131876	4.26883	1.96503e-05	0.000670476	2577.16	1995.85	1995.2	1529.92	1510.31	1887.83	1648.03	2374	1624.6	1628.29	1908.5	2092.93	1725.16	1659.46	1609.34	2133.95
Fads2	4815.14	1.22117	0.286257	4.26598	1.99028e-05	0.000676174	5332.55	5797.26	5807.09	2677.57	2729.28	7021.46	4285.24	7249.1	3766.79	5931.14	2176.27	5727.53	2447.54	4649.63	5106.77	6337.03
Ctsf	121.068	-3.21584	0.754028	-4.26489	2.00004e-05	0.000677757	22.081	115.537	20.0475	419.167	403.241	91.7695	104.077	63.1247	129.889	168.166	91.6079	11.4368	84.753	93.5722	92.9142	25.7103
Glipr2	312.847	-4.04472	0.948485	-4.2644	2.00444e-05	0.000677757	36.3679	198.502	118.867	1406.23	1121.74	41.5654	92.8632	74.7446	78.2793	110.292	1150.95	45.236	59.3586	169.937	111.165	189.45
H2-Q10	163.028	3.33236	0.782193	4.26027	2.04177e-05	0.000688748	415.95	313.887	401.007	22.8599	22.0926	461.924	40.1561	173.855	104.131	167.462	46.7675	145.75	27.806	110.806	54.7947	99.2045
Stxbp6	580.471	1.64013	0.385186	4.25801	2.06252e-05	0.000694107	1235.91	300.378	554.949	477.281	168.654	344.515	489.871	682.586	635.351	719.152	730.171	780.139	218.616	637.145	696.455	616.372
Casd1	307.452	-1.27761	0.300086	-4.25747	2.06751e-05	0.000694149	115.73	262.266	261.479	381.82	459.788	211.578	209.544	223.563	337.388	487.142	330.945	216.349	514.397	363.877	350.634	192.738
Dsg1b	14.7958	-5.86709	1.37927	-4.25376	2.1021e-05	0.000704104	0	0	13.365	85.2394	26.8211	3.27748	23.5304	1.70607	31.4883	9.06286	8.22122	0	11.0892	9.93687	9.64204	3.35352
Arhgef12	4071.11	-0.930901	0.218976	-4.25116	2.12665e-05	0.000709754	2704.03	4323.93	3403.32	4954.42	4999.63	3526.94	4644.39	2001.96	4629.13	5716.78	3772.98	3107.27	4937.19	4537.11	4842.88	3035.86
Pcyt2	2376.76	1.0562	0.248471	4.2508	2.13008e-05	0.000709754	3886.96	2562.23	2710.48	1323.63	1207.56	3091.58	2115.82	3286.85	2064.93	2151.68	1521.26	2854.87	2290.13	2105.85	2283.66	2570.66
Tinag	683.826	-1.38431	0.325689	-4.2504	2.13389e-05	0.000709754	509.556	551.909	682.383	1321.21	817.203	298.742	604.621	462.717	999.359	513.904	960.315	313.435	1215.72	758.878	480.993	450.272
Prkg2	365.16	3.20404	0.754106	4.2488	2.14921e-05	0.000713186	777.276	168.335	438.81	25.9372	34.1356	170.69	141.567	877.098	68.7101	652.312	699.008	571.175	181.513	572.295	277.583	186.114
Prrc2b	6998.58	-0.683674	0.160932	-4.24821	2.15485e-05	0.000713401	4727.6	6037.54	6183.3	7954.61	8916.77	6919.24	7639.3	4337.6	7905.52	8510.03	7608.53	6271.18	7759.37	8170.27	7183.05	5853.43
Agbl3	71.0491	-1.56018	0.367359	-4.24702	2.16635e-05	0.000713896	16.988	47.1772	62.6381	110.02	113.455	53.5158	74.4046	57.4049	116.318	73.8837	80.3652	40.0979	116.99	77.1489	60.9572	35.4219
Slc25a1	5774.28	0.938871	0.221056	4.2472	2.16454e-05	0.000713896	8514.36	6559.04	6083.18	3038.12	3700.53	8807.11	4731.06	7375	4196.53	5643.26	4210	6983.1	5190.62	4633.76	5618.7	7104.09
Ppia	36387.5	0.646646	0.152311	4.24556	2.18048e-05	0.000716894	41839.7	48410.4	40283.8	27560.1	26305.1	42353	31125.8	49942.4	25858.2	30738.7	33666.9	42203.5	31721.5	30819.4	35486.9	43884.9
Trpv4	427.829	3.0235	0.712757	4.24198	2.21556e-05	0.000726755	87.5721	402.432	246.364	172.939	137.611	204.976	789.771	1646.41	349.208	191.248	222.363	1371.87	71.7232	381.727	392.09	176.954
Polr1d	2996.66	0.469265	0.110777	4.23611	2.27421e-05	0.000744284	3146.89	3685.04	3131.64	2457.41	2674.21	3538	2891.2	3817.46	2368.97	2399.95	2448.38	3466.35	2409.27	2629.1	3311.18	3571.58
Asns	2746.35	2.26765	0.535437	4.23514	2.28406e-05	0.000745795	5027.48	2027.28	2450.61	975.795	601.03	7982.58	1075.89	3866.95	754.46	2690.21	1342.51	6611.31	1642.88	1633.49	1631.98	3627.13
Il17c	43.9739	2.09038	0.493715	4.23398	2.29591e-05	0.000747953	134.063	26.0525	63.0064	12.3026	13.873	34.9598	39.8206	54.5943	34.4403	60.4191	38.7572	48.0344	28.515	43.0598	48.2102	23.4746
Aldh18a1	2318.43	1.58277	0.373945	4.23264	2.3096e-05	0.000750698	2708.81	1945.74	1971.3	1143.2	1349.94	5649.89	1553.97	3755.71	1293.65	2742.08	1251.85	4137.4	1046.94	1623.33	1837.5	3083.54
Ero1l	10201.5	3.22995	0.7635	4.23045	2.33219e-05	0.000756319	28151.6	5627.35	3350.79	1184.56	1683.25	56746.3	4768.52	7835.99	2781.79	7832.32	1858	22974.2	3416.26	3492.81	5473.17	6046.39
Car6	10.1377	7.11986	1.68322	4.2299	2.33799e-05	0.000756479	0	11.4131	2.63831	0	0	37.749	3.27272	21.2175	2.71947	1.39148	0	44.4478	0	1.14426	2.52342	33.6862
Gfpt1	13941.2	1.61674	0.382316	4.2288	2.34945e-05	0.000758467	30873.3	14621.2	10965.4	5389.54	5441.54	26004.9	12872.2	9402.97	13342.4	12979.9	14331.3	21572.9	9334.59	11480.2	12349.6	12097.9
Ankle1	55.6675	1.82833	0.43252	4.22715	2.36673e-05	0.000762322	53.71	107.214	69.2654	14.8641	9.82574	106.803	36.4201	77.7044	55.7107	46.114	54.1251	68.7079	30.9776	35.0403	30.5703	93.6273
Cyp51	10344.7	1.63395	0.386708	4.22527	2.38654e-05	0.000766795	18295.4	13111.2	12472.8	4286.47	2365.07	18294.4	9428.88	12265.4	5518.2	10052.9	4983.01	13370.5	7502.27	8464.62	12938.9	12164.8
Rbp2	2919.15	3.29036	0.778818	4.22482	2.39136e-05	0.000766795	8414.41	1273.94	3363.22	220.829	182.121	728.436	5115.32	1443.18	9714.26	1742.35	3533.65	2171.25	826.117	2606.88	1781.47	3588.94
Smarcd1	627.202	-0.867988	0.205535	-4.22306	2.41002e-05	0.000771046	367.49	642.252	526.962	790.003	884.171	405.315	623.554	518.646	686.838	854.93	655.349	438.028	750.104	632.647	673.19	585.747
Chd6	1440.36	-0.990501	0.234642	-4.22134	2.42859e-05	0.000773533	887.25	1226.02	911.196	1911.07	1600.88	1204.93	1629.56	811.315	2239.19	2026.57	1637.6	972.343	1793.76	1764.42	1496.61	933.051
Gm1673	385.698	2.61361	0.619143	4.22133	2.42864e-05	0.000773533	355.957	455.922	551.885	46.9152	157.704	86.8941	284.158	1087.51	199.584	313.06	528.112	561.741	123.412	357.717	536.412	524.19
Alpk2	45.576	1.40386	0.332787	4.2185	2.45934e-05	0.000781566	68.9094	76.5725	31.726	30.2	24.2166	71.5144	32.811	58.4168	25.7652	37.522	21.2898	80.6236	23.9306	45.1392	47.6685	52.91
AC168977.1	47.6001	2.66776	0.632586	4.21723	2.47322e-05	0.00078423	55.2024	30.5834	34.3671	13.1814	3.69946	6.55496	31.6755	94.6871	65.9286	101.705	75.1654	99.4998	22.1784	30.6387	79.766	16.7676
Gprc5a	13023.6	1.57173	0.373075	4.21291	2.52105e-05	0.00079534	33523.6	10927.3	13051.9	7884.21	7301.81	16638.7	9486.35	14964.8	6625.33	8453.63	18675.1	19067.4	7539.06	9727.37	8943.43	15567
Ldlrap1	1625.35	1.36885	0.324945	4.21256	2.52498e-05	0.00079534	2715.98	1564.27	1480.67	913.922	1262.83	2882.14	1068.25	2206.89	1162.46	688.524	1593.39	2574.52	725.777	1054.91	1315.32	2795.8
Pxdn	1487.4	-3.00977	0.714474	-4.21257	2.52484e-05	0.00079534	27.1647	3212.71	1638.4	828.973	3752.09	1406.11	1014.96	183.229	997.947	3033.62	1073.41	501.921	1373.4	1939.2	828.586	1986.62
Zfp775	29.4498	20.4618	4.8581	4.21189	2.53238e-05	0.000795914	0	64.565	0	0	0	0	0	168.901	1.96802	69.4819	5.8723	0	0	0	160.408	0
Hykk	53.3206	-2.45787	0.583653	-4.21119	2.54034e-05	0.000796662	9.67929	87.6361	28.6531	75.713	92.5287	54.594	32.3919	10.8218	30.9938	43.0078	73.1028	23.9637	77.8786	111.68	47.3089	53.1763
B230219D22Rik	2081.19	-1.04377	0.248069	-4.20758	2.58124e-05	0.000807714	1055.15	1901.84	1740.31	3442.97	2657.14	1778.58	2221.81	1665.98	2711.93	2340.23	1556.16	1551.97	2716.85	2534.73	1975.74	1447.6
Cdc25b	1744.63	2.13828	0.508458	4.20542	2.60601e-05	0.000813678	6951.11	1657.12	2265	706.881	509.064	1497.36	1065.97	1522.91	1491.18	1732.43	2044.89	1535.98	1056.65	1121.54	1199.86	1556.21
1110051M20Rik	475.381	-1.25962	0.299726	-4.20256	2.63914e-05	0.000820551	233.894	488.062	479.681	818.699	835.719	398.92	367.282	228.429	499.263	522.195	504.174	394.427	396.671	542.866	500.426	395.384
Gm14494	268.406	0.920568	0.219051	4.20253	2.63952e-05	0.000820551	304.402	297.905	284.483	210.902	147.054	361.615	257.024	381.307	158.425	264.837	241.939	349.965	190.1	235.173	247.187	362.18
AI467606	568.257	7.59136	1.80683	4.20147	2.65184e-05	0.000822588	4091.29	191.43	63.961	0	0	2.18499	275.124	1337.56	246.986	871.041	5.8723	546.677	30.8913	1056.62	319.94	52.5384
Srm	898.473	1.01241	0.241225	4.19696	2.70521e-05	0.000837323	991.454	1308.63	950.188	702.469	651.271	1726.87	637.78	1196.58	486.503	481.586	567.758	1363.43	408.293	753.405	905.354	1243.98
Mxd1	4958.53	2.86791	0.683828	4.1939	2.74198e-05	0.000846869	29831.4	2323.21	3550.31	1199.5	1285.56	3777.84	3203.75	3981.97	1729.89	2453.01	9464.97	5783.57	2938.63	2829.52	2367.56	2615.74
Gpank1	412.153	0.664987	0.158758	4.1887	2.80561e-05	0.000863979	537.591	388.23	371.193	323.492	372.175	481.975	395.76	541.741	354.699	388.018	298.564	558.666	337.492	321.242	416.368	507.246
Pde4b	22.4036	-5.11614	1.22155	-4.18825	2.81108e-05	0.000863979	5.91033	21.2234	9.5919	63.4812	76.0998	34.7187	23.7784	0	3.23111	8.26639	48.2061	0	13.9169	14.9549	18.5615	16.5175
Smagp	1558.97	1.00179	0.239212	4.18789	2.81555e-05	0.000863979	2935.06	1369	1479.59	907.651	1084.35	1408.9	1475.6	1696.7	1517.81	1798.25	2188.17	1526.24	1080.56	1270.33	1524.43	1680.87
Unc13a	496.589	2.31665	0.553393	4.18627	2.83577e-05	0.000868317	828.23	214.028	257.048	189.913	192.138	1728.09	245.724	809.131	194.978	392.246	160.318	1074.15	162.238	229.857	482.076	785.256
Gm13420	86.536	-1.80038	0.430396	-4.18308	2.87589e-05	0.000877281	14.1949	89.4848	84.9631	114.238	132.256	52.4397	74.2111	27.2972	131.857	121.845	73.991	66.3332	133.07	89.4318	105.186	73.7773
Hivep3	28.2523	-3.57782	0.855332	-4.18296	2.87734e-05	0.000877281	2.34627	23.4369	8.4172	30.6554	64.1582	94.6905	19.7245	6.03477	13.7464	35.0059	14.577	4.71933	63.3818	10.7226	46.1459	14.2742
Rpl19	23596.8	0.541792	0.129587	4.18091	2.90348e-05	0.000883362	25160.8	28300.8	21524.2	19495.4	20223.6	34539.9	22463.2	33158.9	18817.7	17764.8	16757.5	27933.8	19535.9	19785	23517	28571.1
Gcnt4	154.477	2.68858	0.643143	4.18038	2.91028e-05	0.00088355	406.921	225.411	281.619	39.5441	49.0179	37.1448	142.087	151.841	67.8966	98.6845	196.135	155.54	22.1784	151.537	174.433	271.635
Cdk3-ps	273.141	1.40357	0.335809	4.17967	2.91932e-05	0.000883718	648.512	283.237	258.241	167.613	169.839	228.848	235.023	309.111	293.813	153.158	389.332	357.752	158.508	237.85	201.217	278.196
Wnt5a	44.0186	-8.41652	2.01383	-4.17937	2.92323e-05	0.000883718	0	39.6921	0	5.42684	593.14	38.333	0	0.6585	1.51921	1.55468	15.8496	0.882859	7.24064	0	0	0
Arhgef17	3972.65	-0.92679	0.221824	-4.17804	2.94033e-05	0.000887011	1769.63	3227.12	3342.2	4667.08	5182.02	3797.51	4640.91	2568.49	4255.84	4947.31	4376.04	3127.95	4351.71	5250.81	3957.62	4100.23
Onecut2	10665.9	-1.46229	0.350059	-4.17727	2.95034e-05	0.000888152	4378.34	8965.47	8866.71	18975.9	12337.7	6254.53	14200.6	4417.88	19247.2	10021.5	8523.06	7720.96	14199.7	15556.2	10815.7	6172.7
Adamts1	2050.16	-2.61117	0.626064	-4.17077	3.03566e-05	0.000908088	294.338	1050.79	1764.47	1428.49	5940.99	1127.71	2837.75	462.655	5638.6	694.922	1872.38	897.659	2743.45	1846.22	2930.89	1271.22
Alkbh8	168.872	-1.73528	0.41601	-4.17124	3.02952e-05	0.000908088	39.555	94.4597	138.369	213.137	185.238	97.7535	161.346	42.7867	295.514	316.21	170.991	123.954	288.548	234.098	184.007	115.98
Klhl42	511.709	-0.780206	0.187053	-4.17104	3.0321e-05	0.000908088	351.718	634.323	521.234	654.674	528.098	397.668	492.327	336.949	626.813	683.742	570.788	359.114	615.449	507.609	506.645	400.186
Gm14288	62.9022	8.198	1.96751	4.16669	3.09056e-05	0.000919172	30.186	86.8451	213.153	0.731234	0	6.36363	103.925	36.9112	45.8537	58.6555	0.977296	349.822	0.659112	72.3511	0	0
H13	7807.64	0.523249	0.125573	4.1669	3.08772e-05	0.000919172	9836.68	8593.78	8157.5	6096.09	6231.29	8967.1	7688.67	8624.5	8821.87	6764.36	7039.78	8406.92	6363.94	7133.81	8344.15	7851.8
Leprotl1	1444.98	0.722688	0.173449	4.16658	3.09204e-05	0.000919172	1788.56	1308.29	1393.78	1167.87	1087.64	2227.6	1344.85	1706.07	1174.91	1150.98	1293.08	2063.19	1112.09	1283.51	1294.66	1722.59
Tmem30b	668.205	-2.20079	0.528479	-4.16438	3.12195e-05	0.000926134	104.096	686.428	505.006	1871.75	946.137	1395.11	396.396	211.553	480.196	672.665	602.498	434.597	636.044	640.1	695.103	413.6
Aldoc	3129.8	1.43558	0.344981	4.16132	3.16411e-05	0.000936695	3682.44	2113.74	3480.17	1144.18	1462.88	4942.98	3925.4	4786.36	3107.16	2729.69	1480.56	4497.91	2186.56	2877.35	3917.68	3741.75
Mptx2	5.74182	20.2162	4.85943	4.1602	3.17963e-05	0.000939339	89.9011	0	0	0	0	0	0	0	1.96802	0	0	0	0	0	0	0
Aacs	3822.63	1.15744	0.278371	4.1579	3.21187e-05	0.000946904	5753.2	5283.31	4565.96	1808.66	1726.55	4552.73	3260.55	4467.25	2481.47	4260.73	2683.22	4689.29	3147.38	3202.69	4485.1	4794
Melk	742.65	1.53917	0.370665	4.15246	3.28918e-05	0.000965705	707.533	1329.75	1266.63	381.917	198.668	959.442	438.538	1139.49	468.951	374.262	601.958	975.824	390.939	750.32	817.087	1081.1
Tuba1b	16739.1	1.3209	0.318066	4.15291	3.28268e-05	0.000965705	16734.9	25350.8	22366.9	9559.73	6530.97	24307.3	9829.05	27308.8	8630.81	14553.5	14298.3	23354.9	10888.5	12488.8	15486.7	26136.2
Serpinb2	96.8319	3.34306	0.806122	4.14709	3.36731e-05	0.000986616	32.7262	333.617	156.254	4.75662	13.2407	72.9533	135.365	94.0455	23.0808	52.598	218.626	99.6502	5.00205	123.381	86.1948	97.8206
Bex1	58.3698	-6.07113	1.4662	-4.14073	3.46208e-05	0.00101037	0	78.3597	57.7265	168.943	130.156	22.7001	0	0	1.14245	116.161	50.6082	6.1992	128.593	17.3054	35.849	120.173
Lpar6	825.78	-1.27996	0.309157	-4.14018	3.47029e-05	0.00101037	370.645	591.28	818.128	1287.38	878.622	443.553	1096.88	534.001	1684.62	936.495	691.757	512.367	1279.22	833.869	789.771	463.903
Pgd	9047.62	0.895182	0.216264	4.13929	3.48378e-05	0.00101037	15385.4	12824	10124.5	6230.38	7172.65	11383.4	8359.14	9227.4	7112.31	5410.87	7807.64	11245.5	5874.55	7228.12	9183.62	10192.5
Rbak	161.71	-1.19597	0.288918	-4.13948	3.48096e-05	0.00101037	91.1895	105.703	129.817	247.027	208.261	85.3271	237.166	93.4481	282.129	158.153	171.1	93.9649	183.518	210.448	198.274	91.842
Smim14	3902.37	0.946318	0.228558	4.14038	3.46726e-05	0.00101037	7303.53	4387.42	3306.91	2269.93	2718.54	5169.62	3614.65	4354.28	3241.8	3848.4	3132.54	4305.97	3291.9	3298.74	4184.39	4009.31
Rtn3	7576.66	0.513956	0.12418	4.13878	3.49154e-05	0.00101056	8915.33	8030.45	7485.76	6060.49	6106.6	8263.69	7268.62	10496.7	7468.66	7248.26	7580.69	7615.32	6762.71	7581.95	7410.63	6930.73
Lypd6b	350.601	2.17713	0.526349	4.1363	3.52957e-05	0.0010195	1207.32	389.905	363.819	92.8065	93.9348	156.196	337.339	274.226	372.132	348.683	431.016	486.446	247.251	269.029	377.022	162.489
Tuft1	3650.24	-0.996958	0.241074	-4.13549	3.54201e-05	0.00102103	2089.81	2909.96	2589.94	5276.94	5672.2	2042.96	3763.95	3372.05	4008.85	3911.13	4509.93	2583.56	5116.07	3419.11	3265.15	3872.19
Bend3	759.699	-1.07938	0.261071	-4.13444	3.55824e-05	0.00102158	266.669	730.36	615.199	1009.24	1171.82	784.922	808.873	562.027	893.494	732.157	790.705	639.544	932.138	789.992	711.546	716.501
Rars	3547.42	0.670531	0.16217	4.13473	3.55372e-05	0.00102158	4508.63	3850.08	3788.9	3081.13	2812.88	5198.23	2995.25	4233.37	2577.85	2334.34	2923.98	5194.13	2861.27	3105.79	3495.9	3796.96
Mau2	1201.18	-0.662672	0.160303	-4.13387	3.56705e-05	0.00102205	1061.28	1057.8	1016.52	1504.21	1534.08	881.488	1484.87	806.831	1273.75	1444.8	1335.13	977.556	1458.64	1285.77	1187.52	908.644
Oaz1-ps	2721.92	0.59819	0.144818	4.13064	3.6175e-05	0.00103443	3260.1	3060.61	2520.25	1804.09	2115.17	2852.5	3019.13	3422.38	2599.75	2635.28	2332.48	3202.29	2609.92	2393.13	2727.82	2995.81
Lrp8	416.724	1.72767	0.418328	4.12995	3.62843e-05	0.00103548	699.021	495.209	649.905	214.497	90.2597	676.04	375.627	437.823	173.669	258.585	349.645	687.153	245.205	242.159	486.485	586.296
S100a8	54.0771	4.72035	1.14387	4.12665	3.68085e-05	0.00104834	63.0885	3.39816	46.7775	5.27254	0.924865	4.36998	164.712	123.69	54.1205	1.00698	18.7914	292.781	11.8813	32.2948	17.531	24.5924
Dnm3	23.7676	-5.13119	1.24442	-4.12337	3.73367e-05	0.00106127	2.51846	5.67068	2.94414	180.878	2.95361	10.7885	1.44511	3.92298	8.27343	28.1282	1.87535	1.8262	105.853	10.0002	11.4184	1.78494
Ubd	22.2075	-7.23639	1.75562	-4.12185	3.75844e-05	0.00106619	1.57721	6.79632	22.9114	124.784	25.8962	0	7.24011	0	1.96802	4.02794	109.225	0	36.4359	4.96844	6.13584	3.35352
Zbtb1	780.469	-0.845365	0.205188	-4.11996	3.78932e-05	0.00107281	523.634	632.057	614.789	1195.11	933.189	476.327	790.982	585.183	973.185	913.335	1089.9	545.534	846.738	973.813	906.352	487.378
Ddx42	2542.04	-0.404772	0.098309	-4.11735	3.83262e-05	0.00108292	2174.44	2553.15	2396.31	3025.77	2912.7	2604.84	2545.55	2240.09	2563.47	2406.97	2690	2214.95	2840.49	2845.63	2361.13	2297.23
Bptf	3472.69	-0.556001	0.135188	-4.1128	3.90896e-05	0.00109717	2933.87	2734.25	3507.57	4284.2	4027.77	2965.55	3781.2	2282.64	3819.23	3385.08	4263.02	3159.55	3995.17	3791.02	3591.1	3041.81
F2rl1	5405.67	1.2968	0.315251	4.11355	3.89618e-05	0.00109717	8639.96	6006.81	6971.75	3483.39	2617.37	6825.9	5063.55	7281.52	4029.52	1642.39	4693.14	7849.05	3573.88	4593.32	5292.6	7926.59
Mmp13	279.655	2.62533	0.638377	4.11251	3.9138e-05	0.00109717	203.46	183.501	183.291	22.8477	76.7638	1042.24	301.37	426.518	124.969	199.383	124.493	634.74	105.347	276.576	320.817	248.16
Rpgrip1l	346.962	-1.36693	0.332353	-4.11288	3.90747e-05	0.00109717	152.214	198.398	233.689	613.88	468.94	180.701	445.968	180.128	387.955	312.792	343.597	292.998	527.255	468.447	400.72	343.709
Atad1	1329.39	-0.653592	0.159145	-4.10689	4.01022e-05	0.001122	1181.33	1022.85	1357.5	2058.05	1388.22	1046.61	1375.62	1007.44	1503.57	1534.64	1504.48	1048.75	1641.2	1514.54	1235.93	849.557
Map4k3	1048.39	-1.67771	0.408911	-4.10286	4.08079e-05	0.00113951	379.902	682.003	666.443	2415.1	1638.04	874.514	1494.41	421.3	1041.9	1032.24	498.048	924.234	1468.75	1489.02	1028.35	720
Odc1	8250.06	0.70354	0.171502	4.10222	4.09206e-05	0.00114042	9619.41	8451.22	7593.22	5925.46	7110.37	12863	7511.61	9463.59	7317.09	6763.91	6216.42	10458.9	5105.78	7488.26	8444.67	11668
Atp6v0b	3002.81	0.976425	0.238054	4.10169	4.10145e-05	0.00114081	5352.9	2767.66	3199.14	2219.07	2383.62	4069.12	3013.02	3639.2	2417.53	1538.28	2693.65	3746.15	1869.81	2573.94	3036.21	3525.63
Rap2b	1130.49	1.27901	0.311962	4.09991	4.13311e-05	0.00114738	1398.99	843.876	1023.38	830.426	692.724	2268.02	930.354	1646.36	704.55	660.582	961.883	2275.92	670.103	908.396	983.488	1288.87
Dnah2	25.9658	-2.8135	0.687456	-4.09262	4.26518e-05	0.00117717	2.97724	15.7703	8.30686	61.146	71.246	30.3503	14.175	16.33	39.9041	20.8809	10.2196	6.47661	33.9512	26.9019	17.2571	39.5598
Foxa3	260.414	3.62304	0.885083	4.09345	4.24996e-05	0.00117717	2215.98	217.482	169.926	36.9078	53.6422	198.834	78.7362	70.802	123.001	170.18	139.761	81.201	101.387	163.13	198.1	147.555
Galnt18	25.2901	-7.60451	1.8581	-4.09263	4.26514e-05	0.00117717	0	20.389	14.3196	83.4819	39.7692	16.3874	1.81003	0	0.984009	170.18	9.39568	0	0.792084	5.79651	12.2717	29.0638
Ffar2	32.0476	4.0645	0.99456	4.08674	4.37483e-05	0.0012051	245.902	25.9991	31.4849	3.18194	2.41015	13.7759	18.8793	5.27657	34.2571	24.9153	12.7572	34.2914	11.4437	14.9909	18.3966	14.8003
Gm28049	54.1931	5.47047	1.34049	4.08094	4.48542e-05	0.00123082	11.9654	12.2357	0	15.2048	1.26278	9.16731	5.25329	381.944	9.73707	7.00665	0	403.588	1.37784	0.886734	6.3051	1.15422
Zfp667	51.3439	-1.81195	0.443983	-4.08113	4.48171e-05	0.00123082	23.9965	41.5638	34.1751	93.1585	65.3904	59.2708	51.3942	20.6129	113.891	61.6911	43.6726	16.3769	54.5847	64.0702	36.0863	41.5671
Zfp472	122.111	-0.824204	0.202038	-4.07945	4.51431e-05	0.00123637	107.25	101.945	132.695	181.024	150.753	78.6596	115.842	94.6871	151.537	141.985	132.714	72.0516	150.496	116.758	131.482	93.8984
Fnbp1l	3448.61	-1.15212	0.282494	-4.0784	4.53472e-05	0.00123921	2084.91	3004.53	2645.73	6218.56	3750.9	2095.99	4451.23	1770.22	4050.07	3408.16	5279.89	2577.96	4325.6	4309.64	3207.42	1996.98
Metrnl	1118.77	2.24262	0.54993	4.07802	4.54208e-05	0.00123921	5355.4	631.744	1120.5	421.81	360.439	651.762	791.254	1204.02	575.795	718.136	1687.22	1384.2	895.297	669.094	672.199	761.42
Aars	6767.48	1.00895	0.247527	4.07614	4.57902e-05	0.00124691	10363.3	6569.21	6936.54	4636.7	4866.93	11543.8	4738.04	7453.34	3885.65	6365.51	5254.21	10479.3	4555.82	5433.97	6259.17	8938.18
Utp20	1169.41	-0.857846	0.210496	-4.07535	4.59456e-05	0.00124876	600.918	1490.66	1373.73	1540.46	1410.42	978.875	1164.75	815.503	987.945	1150.98	1304.83	1000.72	1436.05	1197.39	1164.06	1093.25
Pcnx	190.049	-1.3558	0.332849	-4.07333	4.63456e-05	0.00125485	121.445	84.954	132.695	309.323	246.939	109.249	161.997	133.927	140.713	349.424	223.147	107.506	373.072	220.267	224.397	101.723
Rnls	34.1483	-1.62457	0.398827	-4.07336	4.63398e-05	0.00125485	13.4025	13.2349	39.0678	54.5338	62.0898	32.8461	34.5219	20.9534	35.589	40.4456	47.3437	20.3002	55.7944	30.7064	34.8573	10.6863
Aig1	860.665	0.54589	0.134057	4.07208	4.65947e-05	0.00125683	1085.14	801.941	1029.99	591.891	687.25	968.078	977.363	916.247	757.252	754.226	887.792	899.182	704.08	917.95	900.432	891.832
Zfp664	3567.26	-0.636891	0.156394	-4.07235	4.65411e-05	0.00125683	2542.9	3536.11	3090.78	4537.16	4608.61	2803.19	3795.7	2972.59	4193.25	3752.77	3744.86	2716.62	3660.73	4146.09	4090.54	2884.31
Atp8a1	1474.26	1.64589	0.404364	4.07032	4.69478e-05	0.00126158	2364.73	2365.71	1849.69	435.529	637.165	1119.27	1356.21	834.075	1051.54	1871.98	2062.49	1543.28	441.974	1229.36	1963.03	2462.19
P4ha1	1848.05	1.9386	0.476275	4.07034	4.6944e-05	0.00126158	2515.13	1117.81	1329.79	496.176	870.51	5411.85	2015.83	2929.99	1054.44	1500.24	510.351	3004.79	837.67	1689.32	1878.8	2406.05
Abcd4	513.322	1.2084	0.296922	4.06978	4.70581e-05	0.00126216	755.484	451.955	450.591	296.141	397.692	645.664	699.575	702.049	492.004	234.627	273.649	861.188	309.705	448.815	677.572	516.441
Cd1d1	50.5354	-2.7729	0.681602	-4.0682	4.7377e-05	0.00126596	1.69036	30.337	35.5414	109.75	130.259	14.1356	106.289	24.8644	76.4187	28.1613	58.5329	14.5754	56.105	54.611	57.6846	9.61122
Gm2026	49.0007	-7.79677	1.91634	-4.06857	4.73017e-05	0.00126596	0	82.2299	44.1886	0	14.27	0	30.3916	0	176.899	76.0994	28.7806	0	127.245	54.8642	85.1251	63.9171
Atf4	5383.82	1.47841	0.363534	4.06677	4.76697e-05	0.0012714	8833.96	3918.08	4807.58	2991.29	2782.92	13999.2	3473.44	7261.9	2852.64	4420.66	3423.55	9590.87	3443.98	3164.07	4402.91	6774.1
Hmha1	249.423	2.41528	0.59399	4.0662	4.77868e-05	0.00127215	492.233	334.088	284.839	27.1238	46.4959	183.593	146.914	362.768	130.489	203.758	143.662	322.938	146.691	127.797	289.596	747.787
Fam96b	667.465	0.685826	0.168721	4.06484	4.80654e-05	0.00127481	680.669	721.18	624.859	533.165	480.435	983.336	609.908	847.058	542.831	542.501	654.603	965.736	538.348	558.729	621.9	774.187
Gkn3	8.56637	-14.9912	3.68792	-4.06495	4.80434e-05	0.00127481	0	115.537	0	0	0	0	0	0	0.984009	17.1187	0	0	0.792084	0	2.62965	0
Dapk1	1513.19	-1.50417	0.370095	-4.06427	4.81827e-05	0.00127555	632.66	1408.04	1265.76	2690.16	2901.94	1991.86	1805.24	917.827	1353.97	498.013	1319.32	900.237	1363.92	1809.23	1470.61	1882.23
Pfkp	4466.34	2.19382	0.540145	4.06153	4.87519e-05	0.00128822	14719.4	2034.53	4087.34	1541.67	1559.07	11010	3606.8	3983.45	2847.34	3099.19	1497.91	7871.07	2706.89	2459.05	3326.26	5111.51
Kctd17	95.4942	-3.51032	0.865315	-4.0567	4.97717e-05	0.00131032	0	99.6247	35.1919	347.597	327.471	111.346	132.982	47.75	72.3646	53.082	42.6049	17.357	82.8932	76.154	57.7053	23.7822
Rpl13	10972.3	0.763164	0.188109	4.05703	4.97017e-05	0.00131032	11551.1	14698.6	9552.22	7321.69	7405.67	18469.6	8953.7	14858.4	6957.5	10398.5	7852.3	14515.8	9387.42	8399.32	10384.2	14850.9
Trp53bp1	1881.25	-0.744205	0.183495	-4.05572	4.99799e-05	0.00131338	958.411	2089.81	1935.09	2266	2077.8	2094.15	1945.28	1429.06	1559.74	1957.83	2371.5	1356.9	1941.73	2223.08	1867.23	2026.44
5430435G22Rik	182.503	-2.78035	0.685807	-4.05413	5.03213e-05	0.00131992	10.7802	174.644	137.497	374.244	427.273	138.965	265.696	131.256	195.096	141.436	231.738	11.76	264.107	138.963	139.577	137.007
Fancd2	196.716	1.52893	0.377531	4.04981	5.12586e-05	0.00133713	203.546	297.043	293.234	69.7823	79.4218	352.738	99.9104	265.206	190.397	164.642	121.46	310.386	120.887	187.345	179.16	212.3
Fth1	29712.4	1.15285	0.284652	4.05003	5.1212e-05	0.00133713	52082.7	25828.3	29094.6	17433.7	20023.3	29104	31423.9	47892	22272.1	18810.5	43755.7	38069.6	24625.9	23960.3	22777.1	28244.4
Klhdc7a	3673.5	-1.66845	0.411922	-4.05039	5.11319e-05	0.00133713	777.565	4162.74	3293.51	7574.01	6015.32	1657.31	4377.55	2582.14	4374.9	3506.32	2730.62	2378.85	4661.42	3442.3	3796.33	3445.18
Zfp326	399.264	-0.77433	0.191358	-4.04649	5.19911e-05	0.00135376	340.012	377.034	366.174	582.413	491.091	364.423	372.828	305.536	404.598	469.161	359.157	311.956	560.536	373.948	464.585	244.779
Bglap3	68.7412	3.58965	0.887815	4.04325	5.27161e-05	0.00137014	406.498	34.4489	78.1275	22.5166	8.80532	193.313	63.1715	46.2987	28.5979	33.6709	16.0169	43.9207	9.92729	19.488	62.6452	32.4127
Btbd19	127.957	1.74728	0.432552	4.03946	5.35746e-05	0.00138992	158.692	153.414	141.576	85.9203	52.8964	184.119	213.313	186.552	87.3264	53.3001	82.6847	228.783	33.4697	83.5971	78.7672	222.907
Pde8a	14.5278	-5.13768	1.27265	-4.03698	5.41446e-05	0.00140216	0	10.7346	6.03133	47.1912	55.404	25.0941	2.85889	1.48534	12.4337	5.48394	12.792	3.61282	43.1361	0	5.53795	0.648807
Spred2	1497.53	0.751238	0.186136	4.03595	5.43808e-05	0.00140573	1594.69	1771.16	1443.99	946.945	1010.65	2341.61	1504.31	1334.93	1469.94	1322.55	1438.39	2098.32	1027.92	1574.61	1525.29	1555.21
Smad5	1665.5	-0.846742	0.209938	-4.0333	5.49998e-05	0.00141915	1051.38	1488.12	1434.54	2535.53	2117.34	1252.56	1770.51	1058.7	1924.3	1860.71	1535.63	1497.02	1838.2	2145.84	1575.74	1561.92
Eif4ebp1	705.635	1.7999	0.446637	4.02988	5.58049e-05	0.00143733	875.352	521.051	543.191	260.112	307.055	2264.74	400.016	1074.83	259.778	585.058	398.142	1461.62	412.676	375.117	504.016	1047.41
Fn1	12237.3	-2.92858	0.727171	-4.02736	5.64064e-05	0.0014502	363.03	12383	5986.78	11756.4	33560.5	10530	11310.7	3371.22	3784.47	26373.3	13851.7	3706.18	11353.9	17146.4	19618.2	10701.3
Flnc	434.934	-3.19656	0.793908	-4.02637	5.66453e-05	0.00145373	81.7427	652.476	294.071	735.982	1311.33	440.149	60.1793	120.954	874.294	125.057	1052.67	53.6819	305.961	326.33	422.578	101.491
Dusp5	1524.89	1.66248	0.41359	4.01963	5.82897e-05	0.00149056	2528.27	1480.46	1310.72	654.674	896.195	3717.76	1037.15	2334.76	743.911	538.737	1699.44	2890.07	898.224	707.174	931.772	2028.88
Zkscan3	1024.37	-0.765508	0.190424	-4.02001	5.81945e-05	0.00149056	644.535	1126.58	781.226	1211.43	1481.18	940.427	963.809	842.731	898.661	1206.65	1101.07	867.563	1316.02	1044.73	1100.41	862.925
Tmem258	1452.01	0.676993	0.168444	4.01911	5.84188e-05	0.00149119	1651.85	1643.25	1383.98	1049.1	1152.99	2081.1	1329.72	2207.34	1344.73	1379.5	1147.18	1588	1207.96	1163.28	1342.13	1560.06
Selenbp2	186.284	-2.45489	0.611129	-4.01697	5.89504e-05	0.00150208	55.6903	53.9066	88.6754	241.067	292.945	140.555	75.993	40.6744	230.614	191.593	130.273	141.758	769.425	167.136	272.25	87.9859
Zfp407	735.843	-0.619841	0.154363	-4.01548	5.93249e-05	0.00150892	610.072	623.183	726.15	881.387	869.068	585.056	754.842	473.091	869.137	723.195	1042.86	582.133	802.182	774.256	767.239	689.63
Nyap1	185.618	1.45883	0.363896	4.00893	6.09957e-05	0.00154866	256.742	69.1956	153.446	104.773	89.1612	165.689	215.959	346.344	161.829	224.513	174.879	331.83	146.365	139.466	170.361	219.327
Adnp	980.567	-1.51882	0.378935	-4.00812	6.12032e-05	0.00155117	516.154	1125.47	652.181	1739.14	757.922	546.315	1318.95	275.428	1235.43	1518.23	1298.52	472.3	1120.69	1362.05	1009.73	740.585
Ptpla	313.964	1.20404	0.300469	4.00721	6.14393e-05	0.00155439	542.843	464.078	387.967	171.925	234.789	415.639	244.449	425.409	188.215	303.625	243.765	416.597	193.876	263.063	306.146	221.032
Paox	688.772	1.66094	0.414559	4.00651	6.16221e-05	0.00155626	842.043	1422.2	495.929	227.945	497.288	1143.41	637.932	1422.5	281.014	534.522	191.306	1259.08	389.242	320.643	593.86	761.43
Fam84a	629.069	1.46103	0.364729	4.00579	6.18114e-05	0.00155828	973.14	559.563	499.278	270.657	492.953	1081.57	631.699	1091.89	286.347	295.046	680.012	1035.03	362.775	490.219	701.239	613.693
Gm18953	52.579	-1.41607	0.353573	-4.00502	6.20109e-05	0.00155997	37.8531	31.7161	63.0064	112.481	71.2146	24.0349	59.7309	23.885	58.0565	46.3213	66.9442	32.0229	62.5747	48.8563	57.8522	44.7135
Mutyh	106.794	1.53343	0.382907	4.0047	6.20969e-05	0.00155997	87.7439	198.839	130.599	54.5658	56.029	107.522	79.17	206.253	110.739	63.1594	77.5797	151.619	44.1803	128.998	87.2311	124.476
Il13ra1	3332.31	-0.958803	0.239474	-4.00378	6.23388e-05	0.00156329	3432.01	1813.48	3370.84	4268.12	4644.67	2003.63	3946.76	1558.5	4747.84	3869.84	4094.17	1889.35	4445.18	3769.39	3483.41	1979.69
Scaf8	1713.96	-0.50201	0.125467	-4.00113	6.3042e-05	0.00157815	1424.22	1521.24	1626.71	2343.65	2043.03	1548.06	1761.16	1366.56	1758.42	1946.5	1643.07	1572.55	1792.49	1887.18	1659.31	1529.2
9230110C19Rik	95.9319	-1.94918	0.487357	-3.9995	6.34763e-05	0.0015807	28.3898	52.1051	104.056	247.81	184.048	39.3298	105.887	43.5049	102.337	48.3352	123.318	70.9079	122.773	54.6528	111.322	96.1341
Gml	66.5641	4.02091	1.00518	4.00021	6.32867e-05	0.0015807	507.164	34.3681	87.0849	12.5337	10.0072	11.8408	57.4382	29.8442	39.105	5.94313	109.259	38.2196	12.8773	31.746	37.2096	40.385
Tuba8	79.8426	2.71978	0.679976	3.99981	6.33935e-05	0.0015807	28.3898	157.448	142.242	12.3026	16.6476	76.4746	61.5409	232.879	32.4723	85.5937	79.8633	84.632	23.7625	61.2774	45.5806	136.376
Zdhhc12	916.162	0.798293	0.199764	3.99618	6.4373e-05	0.00160024	1191.35	947.815	1099.78	541.204	619.978	834.416	846.916	1254.66	769.145	880.423	992.775	1039.56	842.491	812.514	903.578	1082
C3	5473.52	-2.98974	0.748361	-3.99505	6.46798e-05	0.00160507	517.946	2336.68	2534.79	5864.16	23280.3	5722.65	12314.5	2793.57	7283.58	5126.98	1287.45	1292.98	7442.93	3161.18	4171.3	2445.31
L3hypdh	59.8326	-1.90292	0.476556	-3.99307	6.52239e-05	0.00161576	11.239	93.562	29.0098	155.995	99.6118	91.7646	21.3386	38.1891	66.1663	52.9092	58.4833	27.6135	51.1859	40.647	45.051	74.5552
Iws1	508.998	-1.08663	0.27216	-3.99263	6.53438e-05	0.00161593	255.508	391.921	456.319	809.335	496.653	480.697	535.768	324.154	705.534	529.674	519.111	408.292	795.253	674.879	427.756	333.116
Tnfsf13	707.872	1.34075	0.33604	3.98985	6.61165e-05	0.00163221	711.909	1118.01	564.087	232.356	367.575	1071.75	952.038	1029.73	688.121	835.018	434.992	961.434	467.651	582.548	642.872	665.863
Tub	13.8251	-4.10855	1.0299	-3.98929	6.6272e-05	0.00163322	0	6.58575	2.49156	33.7856	90.4603	2.80021	22.473	4.45277	8.40716	5.16207	5.01717	2.98494	14.2115	7.78236	5.99124	8.59551
Pdzk1ip1	4677.18	-1.209	0.303191	-3.98759	6.67484e-05	0.00164213	2306.47	5188.13	4386.83	8957.09	6766.76	3367.15	5135.36	4445.08	5939.1	2922.01	4105.55	2834.57	6444.55	3835.56	3729.09	4471.61
Mpp7	485.305	-1.02056	0.255996	-3.98662	6.70214e-05	0.001646	331.214	321.692	436.271	878.757	509.601	310.268	349.335	270.413	758.671	568.946	564.915	423.16	688.321	571.37	468.954	312.995
Gm21985	17.5763	-7.23366	1.81533	-3.98476	6.75472e-05	0.00165323	0	27.1853	2.86393	52.7254	30.5206	51.3472	7.24011	0	0	33.2305	0	0	12.6733	3.31229	0.876549	59.2454
Syt12	635.761	-1.16645	0.292704	-3.98509	6.74532e-05	0.00165323	264.65	330.381	841.085	800.198	891.948	227.628	684.434	559.551	770.743	866.071	1186.73	299.395	833.675	639.022	612.246	364.419
Tia1	674.527	-0.949241	0.238398	-3.98175	6.84094e-05	0.00167146	377.595	567.273	622.014	753.927	745.971	448.408	692.461	354.799	987.769	1193.18	835.739	561.205	994.945	699.612	606.177	351.356
Ss18	2129.88	-0.475702	0.119503	-3.98065	6.87268e-05	0.00167635	1909.35	2247.96	2033.94	2617.58	2626.92	2320.41	2245.73	1821.04	2161.26	2066.77	1920.26	1800.63	2444.89	2190.8	1821.35	1849.18
Cdk1	2019.71	1.33217	0.334754	3.97956	6.9043e-05	0.00167832	1964.88	3436.48	2884.49	955.298	662.051	3074.06	1208.87	3215.8	1412.65	1463.46	1628.02	2673.22	1501.88	1768.16	1707.33	2758.66
Pdia6	9045.28	1.07202	0.269382	3.97957	6.90408e-05	0.00167832	14201	9334.34	8931.03	4898.57	6172.02	18028.1	7586.85	8853.35	6552.58	7366.39	5119.97	10982.6	5117.8	7103.79	10868.5	13607.5
1700029J07Rik	23.059	-2.3543	0.591803	-3.97818	6.94449e-05	0.00168522	1.8126	14.2661	12.0601	52.4161	53.0843	23.8169	19.754	12.7445	29.3529	18.5164	31.0441	9.20056	24.5383	21.7948	29.2098	15.3327
Scpep1	3033.28	0.8472	0.212993	3.97759	6.96167e-05	0.00168652	3872.05	3105.92	3471.08	1574.73	2054.13	4914.04	2848.08	3117	2592.86	2156.96	2296.07	4085.21	2525.16	2909.02	3182.75	3827.48
2210011C24Rik	69.0191	2.68737	0.676234	3.97402	7.06699e-05	0.00170336	382.668	30.2653	82.2921	36.5591	9.88464	25.6596	39.0448	69.0066	61.4069	45.5767	47.6433	74.0143	34.784	56.339	44.5711	64.5912
Ppip5k2	2688.98	-1.13426	0.285414	-3.97408	7.06523e-05	0.00170336	2133.89	2110.73	2468.75	4116.27	2736.84	1625.04	2875.07	1005.62	4447.45	3666.15	2872.26	1760.41	3890	3338.98	2523.09	1453.1
Rai1	2783.19	-1.01495	0.255351	-3.97472	7.04615e-05	0.00170336	1224.89	2367.03	2113.88	4144.32	3997.97	2150.92	2586.44	2865.98	2525.56	2967.8	2905.73	2076	4331.16	3088.91	2472.29	2712.14
Zfp451	613.396	-1.08271	0.272531	-3.97279	7.10343e-05	0.00170926	292.056	546.039	474.27	959.966	639.475	563.725	643.581	360.948	760.935	1028.71	624.607	414.361	664.876	800.073	454.659	586.056
Slc17a5	418.153	-1.26372	0.318192	-3.97157	7.14014e-05	0.0017152	281.904	389.266	339.869	928.694	554.515	403.952	426.445	243.601	642.154	411.553	365.31	264.699	412.212	445.425	303.408	277.443
Smarca5	2237.52	-0.624667	0.157336	-3.97027	7.17911e-05	0.00172166	1661.03	1871.62	2230.02	3291.36	2278.87	1630.25	2144.78	1726.47	2265.59	2493.47	2791.96	2021.47	2770.99	2550.59	2379.72	1692.1
Pias2	693.535	-0.567353	0.142948	-3.96895	7.21891e-05	0.0017283	488.395	600.438	676.184	874.133	823.566	608.977	805.229	595.303	790.962	659.582	773.216	547.681	727.469	844.355	756.553	524.511
Sesn2	654.031	1.53371	0.386696	3.96618	7.30326e-05	0.00174557	703.436	474.609	612.88	278.566	471.681	1486.88	447.077	888.011	313.899	388.696	411.061	1372.41	274.061	563.917	710.881	1066.42
Ak4	1435.22	3.51327	0.886194	3.96444	7.3567e-05	0.0017554	5968.07	876.284	794.061	12.9441	320.524	3606.4	843.38	1636.31	192.201	785.212	2000.68	2056.67	512.659	715.479	923.773	1718.93
Gpr125	1024.03	-1.06635	0.269529	-3.95635	7.61032e-05	0.00181288	656.12	1176.9	874.452	1973.69	1778.52	1328.47	913.159	738.73	810.823	705.896	1005.34	817.729	883.966	872.789	937.907	909.92
Fam208a	365.397	-1.14297	0.288979	-3.95521	7.64682e-05	0.00181552	257.085	178.97	330.306	761.004	336.651	186.816	374.676	210.7	604.181	439.045	409.887	271.051	531.489	471.173	311.175	172.147
Nme2	6319.54	0.621709	0.157178	3.95545	7.63906e-05	0.00181552	6824.67	9246.6	7221.47	5107.33	4747.67	8671.97	4742.81	8643.49	3918.73	4100.04	4233.22	8071.05	5445.73	5351.33	6110.32	8676.28
Prrg4	395.252	-1.2779	0.323489	-3.95036	7.80346e-05	0.00184963	200.349	299.539	376.163	507.55	581.86	333.909	544.42	154.652	414.012	339.172	580.578	366.684	659.121	380.842	327.79	257.386
Lypd1	43.9586	4.35206	1.1018	3.94994	7.81693e-05	0.00184975	11.9179	6.9884	70.9624	0.542156	2.28241	6.0662	17.309	379.688	4.85673	8.69773	6.52133	46.386	20.0158	79.5945	37.3709	4.13795
Sorbs2	9449.04	-1.4767	0.373923	-3.9492	7.84118e-05	0.00185241	2684.86	6992.75	9174.11	18686.2	13185.7	4700.18	11284.4	4955.48	16095.9	7537.13	9337.58	7758.52	10988.9	11404	9041.65	7357.2
Obfc1	947.006	0.957013	0.242441	3.94741	7.90025e-05	0.00186328	1081.94	877.847	1007.18	545.691	735.301	1509.91	725.092	1384.63	598.719	785.901	952.351	1369.36	696.438	797.634	842.271	1241.84
Vars	6076.3	0.822624	0.208454	3.94632	7.93626e-05	0.00186869	6636.14	6598.3	7263.23	4331.9	4284.04	7357.27	4939.67	8779.95	4364.53	6113.34	5518.6	8869.34	5116.54	4386.09	5198.95	7462.92
Mageh1	111.632	-2.17901	0.552326	-3.94516	7.97465e-05	0.00187463	33.1214	172.173	73.5074	170.479	291.333	67.7346	64.256	35.8275	130.873	112.782	51.6762	56.0401	105.347	183.004	73.6301	164.322
Tdrd7	1930.99	1.29936	0.329505	3.94338	8.03398e-05	0.00188547	4719.9	1738.52	2350.43	1389.69	1268.14	1831.16	1594.05	2980.77	1022.6	867.755	1868.45	2166.64	1350.13	1420.19	2146.84	2180.62
Xpnpep3	382.299	-0.724039	0.183648	-3.94253	8.0628e-05	0.00188913	287.746	436.449	338.111	374.614	466.208	351.606	429.647	233.245	385.685	423.001	421.727	270.28	463.811	500.672	368.424	365.559
Calr	29818	1.11387	0.282619	3.94124	8.10606e-05	0.00189615	62837.4	28620.2	33395.3	15751.2	19330.1	39303.9	27844.4	27374.7	31122.9	25751.5	23881.9	30527.7	20703.9	25492.1	29491	35659.9
Clca3	104267	5.55173	1.40925	3.9395	8.16507e-05	0.00190061	1.3214e+06	5600.17	46062.4	14978.4	1217.12	8762.89	21740.2	3094.82	55042.5	13014.3	70151.7	11201.2	12279.7	47991.8	18260.3	17478.5
Cysrt1	528.968	1.95904	0.497181	3.94028	8.1385e-05	0.00190061	726.23	720.042	671.138	68.8373	242.853	571.603	603.134	766.542	355.338	826.564	253.328	776.526	271.601	279.469	489.044	841.234
Ssbp2	95.5189	-1.40707	0.357152	-3.9397	8.15852e-05	0.00190061	65.8234	52.2255	88.9609	163.761	203.193	36.793	75.9048	59.0792	140.842	110.567	83.7805	58.7882	118.903	67.8662	126.305	75.5089
Ube2c	1648.14	1.5733	0.399829	3.93494	8.32163e-05	0.0019339	1594.45	2847.15	2705.56	727.794	355.077	2381.42	968.201	2523.97	1781.45	1703.77	1204.85	1958.15	959.074	1468.24	1387.82	1803.31
Zfp260	1261.62	-0.937785	0.238507	-3.9319	8.42764e-05	0.00195535	763.828	1120.43	1042.95	1915.08	1378.9	975.057	1530.09	816.9	1600.84	1598.1	975.484	873.256	1409.19	1755.84	1380.58	1049.35
Atp6v1g2	70.8009	-1.59137	0.405052	-3.9288	8.53721e-05	0.00197116	27.4319	40.9531	54.0656	131.278	137.787	37.1475	141.881	43.0842	76.7924	66.8693	84.5561	42.5305	76.0152	60.2749	79.0309	33.1164
Mid1ip1	3313.63	0.96821	0.246439	3.9288	8.53716e-05	0.00197116	5087.19	3731.7	3025.22	2007.14	1822.34	4558.96	2544.24	3340.24	2346.43	4676.05	3493.35	4126.63	2584.64	2676.09	2634.73	4363.09
Tmem8b	92.7175	-1.93781	0.493208	-3.92898	8.53055e-05	0.00197116	51.9497	86.6906	64.2341	245.508	201.669	84.2007	54.8965	41.3948	81.3305	47.1074	126.08	45.8918	74.1285	117.033	67.7472	93.6191
Lamtor1	2605.33	0.460098	0.117124	3.92829	8.55521e-05	0.00197212	3507.29	2838.25	2355.77	2230.89	2437.65	3049.87	2502.06	3084.28	2172.42	2628.91	2542.39	2806.24	2159.75	2269.47	2392.91	2707.07
Flrt3	2384.61	-0.854825	0.217661	-3.92732	8.58973e-05	0.0019737	1742.48	1417.05	2262.77	3759.63	2607.98	1585.73	2804.48	1694.72	4102.57	2374.49	3463.47	1586.26	2716.89	2602.51	2013.63	1419.18
Lilra6	13.3252	-7.14438	1.81911	-3.9274	8.58701e-05	0.0019737	0	8.00299	6.29849	29.6337	47.0993	0	0	0	30.5368	9.88324	18.5553	0	13.408	13.0827	1.36181	35.3401
H2-M2	57.4416	-4.73071	1.20521	-3.92521	8.66533e-05	0.00198787	11.5841	4.75395	98.7769	318.753	29.112	0	17.0923	0	102.213	9.50906	104.799	4.88077	68.8058	78.1958	58.8612	11.7287
Ndufc1	900.739	0.510965	0.130231	3.92353	8.72619e-05	0.00199862	1101.33	992.68	894.875	770.063	732.56	925.282	734.898	1209.15	857.901	766.464	695.048	1091.24	885.631	858.796	911.79	984.109
Fam81a	325.603	-2.19987	0.560872	-3.92223	8.77318e-05	0.00200616	43.9667	200.351	201.694	707.949	825.132	300.125	308.719	223.565	449.825	251.738	189.18	121.24	259.848	539.174	381.175	205.965
Stk11ip	976.209	-0.791271	0.201878	-3.91956	8.87119e-05	0.00202533	962.877	964.841	774.944	1421.93	1599.37	731.882	997.76	661.604	989.242	1044.64	928.646	746.049	1063.26	1017.38	928.307	786.621
Rnf130	1652.05	0.441425	0.112704	3.91666	8.97824e-05	0.00204649	1922.22	1500.55	1569.48	1227.27	1516.17	1712.48	1508.62	1977.06	1736.16	1609.61	1794.92	1916.85	1540.04	1518.65	1685.64	1697.09
Cxxc5	575.643	-3.53974	0.904299	-3.91434	9.06511e-05	0.002063	29.967	463.282	335.079	624.796	1147.76	1521.84	500.472	63.1247	85.6088	276.921	1239.06	61.7585	33.2675	539.903	579.399	1708.06
Nmt1	3881.89	0.493008	0.126009	3.91247	9.13555e-05	0.00207572	4934.72	4659.38	4305.91	3004.13	3029.61	4551.02	3647.26	3918.75	3227.2	3098.63	3632.63	4623.19	3534.95	3580.42	3866.35	4496.08
Tbcel	1122.21	-0.827808	0.211606	-3.91202	9.15261e-05	0.00207629	745.769	1304.24	1175.27	1556.13	1366.36	1253.83	1050.3	740.204	1403.47	1054.05	1297.73	892.556	1299.68	1014.89	1065.96	734.965
Fut9	216.017	1.99158	0.5092	3.91119	9.18422e-05	0.00208015	161.422	153.569	162.578	46.8692	87.9794	162.505	518.344	351.123	414.093	209.415	285.39	354.543	83.1499	128.795	236.386	100.107
Oard1	379.363	0.456425	0.116714	3.91061	9.20615e-05	0.00208182	480.48	364.228	399.502	318.762	353.168	388.524	345.416	457.604	360.384	338.109	327.018	439.911	331.185	372.061	415.347	378.113
Tgm1	2620.43	2.66004	0.680485	3.90904	9.26644e-05	0.00209213	2014.8	2519.67	2809.27	252.311	533.894	380.683	3016.08	7322.48	3484.23	2922.09	1975.95	5614.1	1579.21	1741.89	2590.95	3169.25
C1rl	24.7805	-2.9529	0.755544	-3.90831	9.29434e-05	0.00209512	6.30885	11.3272	31.5032	32.514	21.2719	14.2024	12.6702	5.97126	25.5842	78.5448	14.0935	4.57471	76.0401	28.1545	23.6668	10.0605
Slc7a11	226.024	2.52296	0.645824	3.90658	9.36119e-05	0.00210686	363.288	197.556	128.101	42.8601	34.6551	1056.78	129.183	205.925	46.6888	60.0246	59.6641	633.827	131.779	99.7813	196.728	229.534
Lrpprc	1332.01	-0.626888	0.160525	-3.90523	9.41357e-05	0.00211531	898.806	1457.8	1371.06	1888.73	1623.68	1464.97	1507.32	1150.8	1272.07	1224.44	1267.14	1060.38	1297.81	1347.48	1288.14	1191.56
Gm11868	53.6031	-15.0021	3.84312	-3.90364	9.47567e-05	0.00212155	0	2.26544	0	0	0	0	236.209	0	340.467	275.914	1.17446	0	0.792084	0.828073	0	0
Psph	759.267	1.74413	0.446805	3.90355	9.47904e-05	0.00212155	821.234	536.806	868.017	394.495	291.814	2133.33	565.148	1045.51	270.868	391.93	342.074	1619.07	354.477	359.37	842.911	1311.22
Tnfrsf23	2578.57	1.68242	0.431017	3.90338	9.48595e-05	0.00212155	3970.51	2411.06	2074.6	729.615	1541.03	6845.15	4014.4	3064.27	994.517	1456.12	2252.3	3439.86	992.744	1887.24	2277.92	3305.75
Nrarp	371.129	0.972584	0.24933	3.90079	9.58789e-05	0.00214099	435.31	462.15	505.006	223.204	221.043	479.605	341.19	546.796	246.002	384.668	290.092	435.741	278.814	305.559	278.743	504.145
Dhx36	1083.91	-0.702446	0.180106	-3.90018	9.61196e-05	0.00214302	863.567	926.086	1124.43	1639.67	1161.22	698.84	1078.64	803.045	1395.68	1008.31	1287.89	839.702	1275.49	1310.82	1096.07	833.13
Cyth3	1104.62	0.786382	0.201786	3.89711	9.73483e-05	0.00216703	1308.06	1110.17	1233	754.367	968.886	1582.78	967.091	1349.7	1059.99	887.391	994.064	1514.28	696.522	983.105	1236.24	1028.23
Sema7a	590.343	2.25488	0.578916	3.895	9.82001e-05	0.00218258	709.745	494.998	659.658	81.7244	295.032	1930.44	489.612	524.618	110.209	196.362	405.189	1311.8	156.833	408.24	349.743	1321.29
Adm2	190.505	3.70063	0.950351	3.89396	9.86223e-05	0.00218516	272.858	127.997	162.289	8.78757	36.9946	761.468	89.5963	394.103	10.8241	180.25	9.39568	536.384	46.733	38.0913	162.162	210.154
Fam60a	1427.08	-1.20404	0.309205	-3.89398	9.86112e-05	0.00218516	437.402	1500.62	1220.92	2361.85	2285.83	1969.65	1248.64	951.153	1078.11	1252.87	1043.5	1264.9	1488.88	1373.81	1371.96	1983.17
Acat2	3184.7	1.80877	0.464733	3.89206	9.93965e-05	0.0021989	4280.99	4115.13	3873.6	690.325	939.007	4731.07	2496.39	4045.69	1535	5002.4	1714.13	5379.67	2282.55	2420.71	3378.51	4070.06
Uri1	1064.84	-1.1271	0.289646	-3.89129	9.97131e-05	0.00220249	435.31	1229	728.392	1665.24	1669.38	1037.87	979.225	874.363	1057.81	1286.93	924.3	914.941	1532.68	993.687	1030.82	677.41
Atp2c1	4075.16	1.9224	0.494173	3.89013	0.000100189	0.00220958	13126.1	3053.62	3785.72	1187.57	2217.46	1683.88	2938.1	4749.54	2176.02	2917	7304.24	6602.08	3051.64	5339.23	3144.59	1925.83
Rpl8	9942.7	0.795583	0.204541	3.8896	0.00010041	0.00221104	10977.4	12082.7	9693.43	6114.39	7590.37	15093.9	8035.62	14249.1	6781.79	10267.2	6936.36	12424.9	7988.17	7992.56	10517.7	12337.6
AA467197	1425.85	2.86428	0.736468	3.88921	0.000100572	0.00221119	10199.1	981.512	949.601	325.911	522.383	1292.25	794.432	1112.55	624.89	1368.16	1180.73	1224.06	872.816	586.902	558.806	219.489
Rep15	696.444	4.84156	1.24625	3.88492	0.000102365	0.00224715	9095.78	96.2812	193.792	222.326	33.2952	125.637	85.0713	67.3899	108.241	83.5797	217.275	120.086	68.1192	195.425	177.063	253.749
Gm15922	30.5777	-4.72543	1.21673	-3.88373	0.000102866	0.00225122	0	11.3272	11.4557	43.0591	59.1914	7.64746	78.7362	0	93.4808	4.02794	49.3273	5.71838	49.9013	19.0457	22.7903	33.5352
Ptgfr	37.0885	-8.3655	2.15392	-3.88385	0.000102816	0.00225122	0	0	0.345619	321.207	71.9612	1.90135	0	0	3.20626	0	169.983	0.828115	12.3665	10.0906	1.52616	0
Oasl1	3576.42	1.99426	0.513617	3.88278	0.00010327	0.00225661	14901.2	2019.49	4174.05	2249.83	2693.81	2219.92	3693.03	4864.41	1471.9	1208.95	2943.37	4079.27	1041.15	2068.1	3994.09	3600.1
Vmac	308.959	-1.40769	0.362642	-3.88177	0.000103699	0.00226252	138.827	277.498	195.1	583.347	551.199	293.333	314.545	270.133	400.415	422.125	194.871	150.507	356.613	295.02	308.679	191.131
Apoc2	66.6078	5.98149	1.54145	3.88044	0.000104268	0.00227144	915.23	2.35075	2.54527	0	9.15173	57.8154	0.939096	2.65548	11.2317	2.08981	8.35028	23.7655	5.75339	15.5685	3.63824	4.63974
Dok7	243.598	2.01566	0.520169	3.87501	0.000106619	0.00231913	87.8933	330.759	265.794	54.5926	98.868	214.247	211.589	421.606	134.705	358.733	396.207	389.015	70.0118	190.904	227.768	444.883
Pcdhb16	81.3273	-3.08794	0.797315	-3.87293	0.000107536	0.00233551	11.0405	40.7779	26.73	58.8767	260.812	40.4223	56.1108	8.53037	131.857	42.2933	25.8381	49.1781	265.348	129.179	89.408	64.8346
Ccnjl	13.981	-4.77991	1.23476	-3.87111	0.000108339	0.00234581	0	3.86472	1.62857	12.7425	78.0365	3.72747	6.94757	0.727617	15.9473	32.6394	29.0517	2.92658	20.2688	0	12.3266	2.86046
Zfp867	192.933	-1.32022	0.341019	-3.87138	0.00010822	0.00234581	48.8936	154.05	164.198	344.473	285.783	112.527	200.008	162.077	196.802	216.502	266.602	134.954	243.962	225.236	211.248	119.609
Sugt1	469.542	-0.768877	0.198805	-3.86749	0.000109962	0.00237735	279.166	523.316	424.816	681.916	599.313	410.778	528.528	423.106	562.853	492.415	433.376	356.827	532.281	407.412	449.67	406.893
Plek2	1369.32	0.73522	0.190256	3.86436	0.000111379	0.00240433	1410.03	1840.67	1327.91	879.636	1260.59	2460.3	1237.15	1623.33	877.736	923.405	894.939	2011.73	892.679	1159.3	1279.76	1829.9
1810026J23Rik	1252.86	-0.416988	0.107967	-3.8622	0.000112372	0.00241846	1094.58	1349.07	1278.27	1422.71	1475.16	1151.49	1325.84	1138.8	1306.76	1186.23	1180.33	945.82	1348.92	1380.4	1287.65	1173.73
Tm7sf2	1953.35	1.3353	0.345706	3.86252	0.000112223	0.00241846	2301.29	2490.42	2175.55	776.568	901.81	3429.16	1498.62	2751.2	1401.85	2831.98	908.749	2277.39	1226.49	1757.84	2057.61	2467.08
C2cd2	333.746	-0.752417	0.194881	-3.86091	0.000112965	0.00242755	236.582	255.995	291.166	456.075	500.352	288.418	319.47	245.675	364.083	440.052	313.581	315.655	389.705	350.275	262.088	310.759
Pwwp2a	285.224	-0.700164	0.181659	-3.85428	0.000116071	0.00249056	179.923	209.827	250.106	353.8	306.507	199.099	328.869	221.495	360.041	386.27	321.191	214.34	344.235	352.796	280.604	254.484
Snrpa1	1025.14	0.691703	0.179507	3.85335	0.000116512	0.00249625	981.853	1131.73	1371.41	826.546	768.891	1274.42	1044.07	1445.07	710.448	852.808	793.833	1248	683.441	968.797	1153.67	1147.28
Tk1	1076.63	1.64481	0.4269	3.85291	0.00011672	0.00249697	1132.5	1758.06	1532.04	338.558	238.104	1674.4	603.527	1912.18	861.814	885.359	811.724	1478.1	869.344	904.05	903.84	1322.54
Icam1	3242.51	-1.98927	0.517356	-3.84507	0.000120518	0.00257436	552.024	2559.95	2191.86	7654.85	7558.92	1873.63	3025.46	2964.3	3636.9	3594.93	2545.05	1112.8	3177.05	5112.52	2130.01	2189.85
Cdt1	623.705	1.07298	0.279133	3.84395	0.000121068	0.00257863	473.163	746.462	778.033	374.351	294.107	896.937	506.808	1068.85	511.684	591.1	508.541	805.148	449.112	640.928	562.744	771.309
Nsdhl	3934.52	1.38271	0.359714	3.84393	0.00012108	0.00257863	6486.71	4994.32	4772.53	1611.65	1391.9	5304.46	2931.56	4492.04	2291.72	5598.82	2717.4	4563.68	2955.71	3436.87	4536.31	4866.67
Celsr1	3418.84	-0.998332	0.259791	-3.84283	0.000121626	0.00258641	1637.15	2499.91	2845.79	3782.17	4406.98	2841.58	4450.86	1679.63	4553.99	4168.91	3141.68	3079.92	4590.92	4098.96	4132.93	2790.12
Mad2l1bp	556.058	0.945235	0.246464	3.83518	0.000125471	0.00266024	1135.59	524.449	590.923	327.776	402.316	512.38	523.098	632.953	489.052	493.422	588.404	564.976	478.419	569.714	522.423	541.034
Ttc12	50.2346	-3.86872	1.00869	-3.83541	0.000125357	0.00266024	0	79.0158	30.131	164.19	170.686	74.9967	7.26398	8.64338	1.85064	63.7615	74.3659	16.9655	42.183	11.0774	24.7282	33.895
Apeh	2813.55	0.916389	0.239028	3.83381	0.000126171	0.00266717	3239.83	2978.93	3124.85	1250.29	2296.11	2523.63	2877.78	4508.41	2668.59	3204.67	2694.41	3475.27	2399.62	2305.17	2566.15	2903.05
Ethe1	1051.31	1.3518	0.352581	3.83399	0.000126079	0.00266717	2733.31	1068.15	1125.52	537.799	529.948	1166.78	828.087	928.104	876.752	739.126	1188.55	1343.82	891.095	984.578	896.71	982.58
Gpsm2	1033.73	1.9479	0.508164	3.83321	0.000126481	0.00266977	4152.06	1072.47	1108.72	419.005	501.961	1315.68	634.822	758.617	1031.65	602.644	1054.43	986.797	606.335	776.667	746.732	771.127
1700052N19Rik	567.802	0.471436	0.12304	3.83156	0.000127336	0.00268383	600.776	690.911	603.647	436.714	478.217	591.283	572.326	689.852	482.019	480.893	571.345	628.943	472.763	613.864	604.726	566.551
Cd2bp2	677.354	0.793585	0.207152	3.83093	0.00012766	0.0026867	782.044	714.815	860.413	414.852	437.869	641.35	638.633	896.046	535.049	626.613	750.22	702.642	521.176	621.976	768.001	925.958
Traf6	1072.07	-0.799005	0.20859	-3.8305	0.000127882	0.0026874	886.429	762.184	1042.99	1482.54	1309.9	945.349	1142.95	674.5	1214.63	1355.19	809.661	852.336	1401.29	1059.77	1067.42	1146.05
Ccnf	706.738	1.31797	0.344176	3.82936	0.000128476	0.00269592	747.598	1151.98	1050.11	324.261	201.621	963.58	441.647	984.404	566.789	649.505	591.928	898.93	529.112	619.398	626.733	960.223
Ikbkg	2021.26	-0.704739	0.184068	-3.82869	0.000128825	0.00269927	1878.69	1978.19	1754.96	2497.96	2642.78	2117.34	2009.86	1325.08	2236.51	2530.69	2043.19	1511.89	2533.43	2115.69	1762.84	1401.01
Cisd3	658.128	0.827813	0.216263	3.82781	0.000129291	0.00270164	1117.24	912.175	685.447	534.791	428.404	757.755	490.703	749.286	620.665	432.948	465.888	801.684	536.688	591.676	665.189	739.505
Mob3a	1092.06	0.645911	0.168744	3.82776	0.000129317	0.00270164	1675	1306.03	1138.89	905.12	895.27	1101.23	1034.43	1314.53	900.368	742.147	1061.71	1260.33	912.481	982.094	901.969	1341.41
Ifi202b	121.999	4.51586	1.17992	3.82727	0.000129572	0.00270301	774.411	2.26544	8.59178	9.66633	19.4222	0	7.24011	26.4441	598.277	436.024	30.536	9.14941	6.33667	9.1088	12.2717	2.23568
Atp13a4	25.0096	4.04746	1.05781	3.82627	0.0001301	0.00271007	13.113	8.71259	10.8231	0.664183	4.92262	33.7511	12.447	16.4286	11.2746	29.1064	12.4241	71.6462	0.598674	21.3595	23.1742	129.708
Glb1l2	14.7899	-4.99592	1.30622	-3.8247	0.00013093	0.00271943	1.84989	15.9426	14.5559	43.2887	59.8058	4.50584	12.7377	2.00103	18.704	0	14.8827	0	16.7225	21.4354	8.43547	1.77065
Rbbp6	1390.82	-0.804792	0.210414	-3.82481	0.000130874	0.00271943	1019.81	1302.89	1299.44	2175.34	1520.31	1200.42	1316.76	791.42	1470.96	1713.25	1378.47	1258.1	1663.71	1738.6	1343.19	1060.51
Zmym4	988.98	-0.942543	0.24653	-3.82323	0.000131713	0.00273171	533.134	981.868	834.926	1465.77	1091.02	792.031	1231.3	686.386	1137.1	709.018	1287.09	687.495	1115.92	1264.65	1073.08	932.896
Eno1	34530.1	1.0148	0.265477	3.82256	0.000132071	0.00273516	41372.4	36048.4	37863.5	19504.1	27614.4	77794.5	29328.2	46145	20697.5	17421.1	16027.2	48017.4	19958.3	26980.7	37957.1	49751.9
Tmem123	2024.7	-0.869565	0.22762	-3.82025	0.000133317	0.00275696	1125.66	1668.21	1710.05	3306.34	3074.22	2156.38	1911.52	1689.77	2000.22	2339.91	1942.59	1948.25	2329.87	2074.29	1489.5	1628.48
Mrpl17	1730.93	0.569583	0.149117	3.81972	0.000133604	0.00275889	2144.77	2098.5	1478.09	1185.08	1650.11	2134.06	1577.03	2142.48	1341.06	1459.2	1230.4	2235.33	1560.34	1361.12	1778	2319.24
G6pdx	3875.17	0.585029	0.153214	3.81839	0.000134327	0.00276982	4993.07	4737.94	4274.79	2797.81	3127.07	3958.13	3508.93	4109.46	3516.11	3430.27	3394.33	5016.43	3483.74	3253.15	4359.58	4041.98
Fry	526.719	-1.38934	0.363969	-3.81718	0.000134984	0.00277935	317.02	381.726	508.824	662.583	826.83	393.298	588.259	128.809	679.95	586.065	401.665	381.988	673.272	737.813	896.71	262.692
Bhlhb9	30.8958	-8.15549	2.1368	-3.81668	0.000135259	0.002781	0	117.834	5.65562	40.43	134.241	15.1018	0	0	37.8922	105.395	12.7561	0	7.03883	17.9879	0	0
Tor3a	2623	1.78859	0.468681	3.81622	0.000135513	0.00278221	8001.14	1518.83	3702.46	1310.74	1346.37	1055.54	2534.52	3526.91	1240.91	2027.48	2868.5	3064.67	1566.42	2046.99	2480.2	3676.38
Baz1b	3623.2	-0.455039	0.119297	-3.81434	0.00013655	0.00279947	2651.12	3938.14	3930.39	4190.11	3874.47	3167.9	3481.72	3171.26	3604.75	4044.42	3560.45	3065.68	4127.71	3841.05	4013.86	3308.18
Herc3	957.272	-1.18058	0.309734	-3.81159	0.000138077	0.00282671	571.247	978.663	1350.94	987.465	1203	782.215	694.768	594.381	945.245	896.357	1260.93	494.675	1572.58	1345.97	643.615	994.303
Mrc1	485.337	2.28828	0.600467	3.81083	0.000138502	0.00282729	784.887	342.677	604.34	70.142	51.9491	828.69	875.772	468.97	232.773	316.547	299.919	874.279	312.997	879.653	635.644	186.162
Rab25	4504.95	0.736469	0.193243	3.81111	0.000138345	0.00282729	6926.87	5248.34	4735.41	3011.01	3156.65	5182.45	4086.25	4601.38	4263.77	4517.12	3648.49	5899.36	4288.56	3471.75	4240.78	4801.01
Pcdh7	82.2812	2.79002	0.732443	3.80919	0.000139421	0.0028402	35.1356	94.2602	119.114	12.3869	25.6613	121.937	216.168	155.328	63.5953	49.6605	87.3584	180.706	15.8166	43.7154	77.0186	18.6362
Rpl9	14157.7	0.535328	0.140543	3.809	0.000139532	0.0028402	16070.8	17172.5	12991	11277.2	11890.3	20006.4	12645.9	18214.6	10535.7	12219.4	9886.52	16470.2	11856	11939.7	16278.9	17067.6
Orc1	167.182	1.5342	0.402877	3.80812	0.000140028	0.0028422	170.825	345.079	292.6	86.3581	60.0627	150.308	114.69	237.895	103.842	76.3411	154.663	217.519	70.0564	196.713	158.732	239.221
Slc27a3	106.959	-1.74222	0.457472	-3.80835	0.000139896	0.0028422	25.2779	101.181	59.3479	183.082	188.588	96.8562	123.766	52.9388	78.1064	149.497	229.071	69.0787	119.379	64.145	69.2014	101.836
Gm15191	11.6669	2.27746	0.598185	3.80728	0.000140503	0.00284778	18.9265	14.7254	8.59178	4.39379	4.62433	17.4799	9.95515	17.0607	7.87207	13.0908	4.69784	22.8735	3.16834	7.45265	10.5186	21.2389
Agmo	73.6326	-2.44975	0.64354	-3.80668	0.000140847	0.00285071	46.5721	86.0208	36.9249	118.393	206.985	74.9274	67.0519	22.2524	151.638	32.1871	21.6747	24.7652	168.243	41.9769	45.7314	32.777
Atp6v1h	1597.07	-0.657044	0.172679	-3.805	0.000141806	0.00285391	1694.2	1579	1401.81	2209.29	1977.84	1502.71	1410.56	1242.14	1512.45	1658.01	1318.83	1354.67	2569.94	1504.76	1476.62	1140.33
Mlkl	1068.57	1.47914	0.388635	3.80599	0.000141237	0.00285391	1893.27	1182.14	1668.73	358.089	561.491	883.019	1026.84	1324.65	486.462	771.471	1343.01	1448.09	753.418	815.827	1132.95	1447.64
Mthfd1l	950.39	1.39574	0.366756	3.80565	0.000141434	0.00285391	1012.13	1079.17	1083.14	442.466	380.972	2287.46	711.537	1074.55	439.508	865.221	567.445	1707.9	618.435	840.381	529.483	1566.44
Wwc2	3168.79	-0.566926	0.148983	-3.80531	0.000141629	0.00285391	2755.39	3519.36	3323.11	3986.04	3583.85	2400.21	2934.05	2383.38	3202.95	3808.41	3411.81	2418.88	3620.62	3363.63	2986.4	3002.51
Prune	1868.48	-0.706976	0.185842	-3.80417	0.000142278	0.00285939	1469.75	1814.99	1723.95	2304.1	2746.79	1836.65	2191.11	1520.89	2285.54	1411.52	1756.89	1327.06	1998.6	1882.04	1823.43	1802.3
Gtf2e2	997.896	0.514118	0.135176	3.80332	0.000142767	0.00285957	1087.37	1039.56	1043.53	904.533	869.43	1394.37	946.415	1248.72	775.524	806.308	810.068	1247.91	739.526	948.568	947.365	1157.15
Klf4	2383.86	3.00923	0.791129	3.80371	0.000142545	0.00285957	17740.8	775.742	1371.44	798.343	569.403	1790.01	1527.53	751.119	1560.94	802.535	3644.11	2000.88	1177.06	1494.57	1373.84	763.369
Sbf1	4503.97	0.899107	0.236413	3.80311	0.000142888	0.00285957	5085.07	4357.05	5084.92	2343.69	3660.66	4553.8	4417.7	8092.35	4564.4	5074.41	4101.64	4503.91	3476.76	3696.8	4568.73	4481.62
Il1r1	2516.85	-1.6658	0.438421	-3.79954	0.000144964	0.00289313	487.43	2936.16	2028.99	4596.96	5418.2	1934.57	2111.33	1429.4	2460.24	3483.94	1715.9	1979.22	2353.29	2154.22	2879.23	2300.54
Mios	382.726	-0.553944	0.145793	-3.79953	0.000144971	0.00289313	311.306	373.042	354.02	495.405	505.181	286.878	347.302	348.657	430.111	437.547	374.645	314.662	434.567	404.789	394.983	310.529
Zfp872	32.4799	-2.63324	0.69313	-3.79905	0.000145251	0.00289467	2.60589	41.2205	23.6397	42.3265	50.3734	10.5788	41.8887	4.5353	68.0285	21.6856	75.7199	12.5163	28.7779	36.2529	42.9065	16.6216
Rbm34	383.646	-0.701169	0.18461	-3.7981	0.000145809	0.00290173	235.005	336.418	367.537	568.556	450.409	311.361	326.71	355.716	396.555	398.766	385.223	320.229	471.29	392.506	420.744	401.304
Ldlr	7071.71	1.44114	0.379494	3.79754	0.000146139	0.00290426	16109.6	7299.24	8265.29	3430.67	2240.02	9268.72	5895.26	6838.79	4912.17	8835.28	5352.01	8060.63	5747.36	5707.9	6433.87	8750.44
Rpl10	28348.6	0.651963	0.171764	3.79569	0.000147236	0.00292199	33696.6	31151.2	28169.1	20480.5	22579.1	43666.4	29804.3	34024.9	25598.8	22985.7	17135.3	35257.9	22478	24409.3	28882.1	33258.8
Eny2	75.7724	-2.09262	0.55138	-3.79523	0.000147506	0.00292328	47.3163	28.318	42.9589	216.174	84.1627	7.64746	113.127	23.032	66.9126	129.901	118.62	27.4482	111.684	105.993	62.235	26.8281
Gstm2	562.908	-2.41514	0.636519	-3.7943	0.00014806	0.00292985	50.7083	430.633	166.295	436.975	1359.33	931.039	553.034	238.671	356.748	1453.3	750.246	233.154	996.754	356.659	311.974	381.005
Ssr4	2948.35	0.842973	0.222187	3.79399	0.000148248	0.00292985	5339.47	3178.4	3075.43	1917.44	2561.62	4339.92	2612.13	3376.51	2526.55	2443.51	2152.77	3260.59	2195.02	2147	2584.81	3462.47
Cs	10290.8	0.672785	0.17745	3.7914	0.000149798	0.0029523	15554.5	11505	10933.5	8802.51	7584.82	13706.4	8336.08	10362.7	7294.46	9236.06	8894.19	13421	8285.2	8819.8	10290.7	11625.5
Tmprss7	92.3897	3.55422	0.937437	3.79143	0.000149784	0.0029523	729.657	27.5199	69.5803	29.3559	3.745	14.3772	78.7892	37.9956	143.441	27.5232	93.9244	57.8877	36.8844	66.2131	44.3669	16.974
Tspyl4	87.8866	-1.76802	0.466518	-3.78982	0.000150754	0.00296704	48.8936	67.9632	97.3735	172.236	158.152	42.6073	73.3061	40.0927	121.033	69.4819	34.0593	37.7413	99.8026	142.428	98.1735	102.841
Edn1	2336.74	-1.82574	0.481803	-3.78938	0.000151021	0.0029681	749.175	1353.6	2357.01	5636.35	4037.96	564.819	3205.56	1878.39	2826.07	966.705	4152.89	1108.22	3575.47	2443.64	1810.95	721.006
Lin28a	22.2129	4.72248	1.24635	3.78905	0.000151223	0.0029681	2.89079	7.26636	29.6644	1.61063	0	25.0297	22.3932	7.81744	45.8654	44.2956	19.3735	52.4047	0.725886	31.1135	12.8527	52.1033
Agr2	1729.05	6.65328	1.75627	3.78831	0.000151677	0.00297248	23838.6	643.552	109.812	236.928	5.55064	373.468	343.995	98.1247	159.451	31.2246	372.401	469.029	0	662.65	141.161	178.901
Pkd1	672.235	-1.09463	0.288973	-3.788	0.000151863	0.00297248	570.951	456.486	608.107	1153.81	863.824	475.235	725.821	255.058	688.806	894.202	978.325	543.246	898.224	647.553	458.435	537.68
Ctdnep1	2429.49	0.424647	0.112121	3.7874	0.000152234	0.00297566	2951.53	2566.07	2429.75	1901.37	2308.53	2616	2358.76	3103.99	2357.36	2047.74	2186.51	2579.64	2223.39	2188.69	2290.36	2762.18
Atf3	2637.07	1.65043	0.43582	3.78694	0.000152514	0.00297704	3496.57	1498.42	3077.23	1988.06	1113.59	4526.72	1930.18	3775.37	1393.66	1087.84	2213.14	6385.11	1248.82	1699.02	1845.81	4913.6
Rps14	13130.4	0.516521	0.136413	3.78644	0.000152821	0.00297896	13492.8	16106.1	11607.4	9772.08	11923.6	19727.3	12534.3	18222.8	9885.11	9500.68	9311.94	15178.7	11091.8	11000.7	12462.1	18268.2
Vasp	10996.1	0.612119	0.161783	3.78358	0.00015459	0.00300933	17851.8	10725.6	10157.8	8257.9	9172.44	12372.1	9927.67	11617.7	11290.7	11837.6	11124.1	11547.1	9398.23	9591.48	9896.9	11168.2
Gzf1	917.665	-0.470374	0.124376	-3.78187	0.000155652	0.00302588	717.474	832.106	922.089	1018.17	1007.15	975.465	943.196	738.732	1027.64	1110.61	841.726	739.974	1018.67	1003.13	989.642	796.851
Cmas	2573.3	0.985827	0.260982	3.77738	0.00015849	0.0030602	5535.11	2780.15	2369.75	1607.2	1662.29	3421.35	2419.82	2621.16	2209.3	1995.71	2256.93	2970.97	2345.36	2092	2258.65	2627.03
Knstrn	988.908	1.41137	0.373553	3.77822	0.000157953	0.0030602	792.083	1494.45	1499.55	479.875	259.86	1460.95	633.749	1610	729.929	900.854	830.991	1371.98	679.38	867.169	986.852	1224.85
Lonrf3	99.7428	2.42119	0.640968	3.77739	0.00015848	0.0030602	274.798	56.5157	142.29	41.5188	13.0251	255.212	53.2475	109.834	55.5303	23.6361	28.2685	221.765	58.6574	58.8904	83.1161	119.581
Ramp3	89.5443	-3.24239	0.858068	-3.77871	0.000157642	0.0030602	1.62329	78.5077	90.393	294.844	139.927	25.8615	81.0365	36.8742	61.7782	4.14561	118.46	32.1987	244.568	87.9686	83.9007	50.6218
Timm17a	1485.57	0.602113	0.159379	3.77787	0.000158176	0.0030602	1923.11	1453.99	1729.55	1230.84	1170.46	1452.54	1226.78	1898.31	1206.17	1388.13	1403.8	1871.81	1348.63	1287.19	1315.03	1862.81
Slco4a1	523.935	2.09785	0.555461	3.77677	0.000158877	0.00306354	353.906	961.3	579.472	84.9645	145.964	455.138	298.83	962.086	209.516	1063.84	639.709	696.574	239.368	335	586.915	770.383
Zfp874a	128.39	-1.54382	0.408948	-3.7751	0.000159943	0.00307993	53.6542	116.871	132.092	256.707	197.555	60.3419	143.186	80.6022	185.466	57.0733	142.085	96.9414	222.754	110.334	140.776	57.7987
Rcbtb2	797.855	-0.715123	0.189472	-3.77429	0.000160466	0.00308583	510.548	758.726	802.149	1058.13	802.67	607.154	881.231	536.862	1104.36	1107.26	737.162	599	843.707	941.54	786.677	688.495
Hspa5	31885.3	1.53688	0.40738	3.77261	0.000161548	0.00310246	52784.8	23971.9	27281.9	14295.3	14729.8	106815	23410.2	30606.6	19204.6	22605.4	18045.1	51357.3	17412.6	22203.8	25713.1	39727.9
Lipo1	54.8571	-3.81934	1.01274	-3.7713	0.000162399	0.00311461	16.2601	60.3757	12.0529	126.034	345.28	63.026	9.97205	9.93812	15.3031	7.47365	14.084	8.1982	11.6829	63.1058	101.816	13.1124
Gtf2f2	904.439	0.456155	0.120996	3.77001	0.000163238	0.0031265	895.856	1030.77	1005.24	777.7	746.366	975.597	908.634	1134.54	812.791	835.797	896.113	1069.34	741.391	840.494	817.82	982.58
Ifnlr1	1209.86	0.93738	0.24872	3.76882	0.00016402	0.00313726	2149.74	1129.32	1205.71	1020.24	965.559	1180.99	1199.14	1761.52	926.936	682.735	1402.31	1373.56	773.074	1258.67	1048.35	1279.92
Cdc20	1612.44	1.40724	0.373432	3.76839	0.000164305	0.00313852	1697.34	2988.84	2417.93	835.637	362.63	2885.25	1031.77	2006.8	1494.5	1107.18	1132.71	2087.49	985.251	1459.19	1603.74	1702.79
Rab36	48.2573	-2.63537	0.699867	-3.76552	0.0001662	0.00317047	9.07698	38.2838	32.8683	119.844	96.4513	30.1446	54.6851	16.3933	26.641	62.9435	53.5427	12.012	17.0663	68.3963	44.9441	88.8241
Rpl36a	3852.18	0.664055	0.176418	3.7641	0.000167147	0.00318428	4024.14	4950.29	3388.68	2936.44	3354.84	6284.06	3050.58	5547.33	2996.72	3639.33	2538.7	4966.49	2887.45	3101.38	3298.32	4670.21
Epha7	60.0555	-2.30695	0.613094	-3.7628	0.000168022	0.00319668	27.333	41.7357	59.1737	113.669	137.345	14.8758	54.5573	33.0457	65.239	27.2079	99.3837	15.2531	127.866	59.6997	80.2665	4.23591
Fbxo3	1342.31	-0.6856	0.182378	-3.75923	0.000170436	0.00323829	988.594	1249.53	1090.75	1821.81	1584.45	1183.83	1378.58	1099.41	1515.24	1805.26	1112.18	1146.52	1798.79	1297.88	1387.28	1016.95
Arl5b	520.836	1.4076	0.374478	3.75883	0.000170712	0.00323921	1163.96	427.968	419.855	258.852	272.584	948.026	454.204	479.95	434.484	351.164	450.714	1005.92	466.298	374.433	301.938	523.028
Ppp2r5b	675.983	0.634182	0.16874	3.75834	0.000171045	0.00324122	1068.65	672.64	617.262	488.77	645.268	667.748	631.941	935.428	590.804	658.405	696.235	706.103	610.087	546.19	616.726	663.467
Pfn1	15822.5	0.584313	0.155514	3.7573	0.000171757	0.0032504	21069.2	17530.4	16944.1	13256.6	13822.2	17023	12962.5	21109.1	11500.1	12975.1	16091.1	18385.1	13314.8	12684	14599.6	19893.2
Ogt	2123.25	-0.7341	0.195425	-3.75643	0.000172355	0.0032574	1402.08	1858.31	1841.19	2597.39	2460.55	2241.59	2325.94	1408.61	2542.89	2775.77	1888.63	1858.23	2707.32	2379.34	2117.67	1566.46
B630019K06Rik	41.0612	-1.45816	0.388216	-3.75606	0.000172611	0.00325792	14.1949	31.7161	29.5939	75.5731	73.0644	33.8673	44.3457	31.5624	48.2164	43.3003	34.0593	30.8793	67.3272	45.544	40.3213	13.4141
Oat	2253	0.843151	0.224557	3.75473	0.000173525	0.00327085	2389.48	4280.55	2595.67	1104.6	1255.04	3145.29	1813.65	2461.01	1311.68	2023.03	1866.22	2506.94	1741	2048.65	2172.97	3332.28
Mrpl45	2095.71	0.582168	0.155067	3.75429	0.00017383	0.00327227	2239.74	2560.81	2408.8	1570.57	1587.11	2801.91	1892.41	2917.69	1689.58	1469.19	1828.84	2261.68	1801.03	2125.97	2106.92	2269.04
Cwh43	2450.71	2.31183	0.616042	3.75271	0.000174934	0.00328438	4899.06	3641.36	3254.86	331.949	386.293	729.801	2638.55	3406.84	2101.91	1105.33	3260.09	3430.12	1644.96	2587.68	4343.45	1449.17
Dicer1	724.397	-1.10972	0.295704	-3.75281	0.000174864	0.00328438	320.174	642.252	525.053	1086.14	1040.47	641.294	666.09	603.097	733.086	1263.77	640.081	491.781	934.659	701.378	824.833	476.199
Sapcd2	223.32	1.86035	0.495979	3.75087	0.000176222	0.0033011	274.889	431.96	424.113	89.3317	31.4017	335.463	135.097	332.706	120.465	226.59	134.619	291.997	125.563	165.884	173.823	279.222
Zfp68	952.306	-0.760423	0.202738	-3.75078	0.000176287	0.0033011	668.494	659.796	952.977	1393.93	973.036	581.081	1185.99	789.585	1281.92	934.01	998.624	678.882	1256.18	1208.52	1223.54	450.334
Pdlim2	1491.69	1.22997	0.328087	3.7489	0.000177609	0.00332149	2368.59	906.732	1563.45	959.089	730.972	872.148	1540.19	1990.02	2179.73	1375.3	1570.31	2216.7	1111.86	1059.57	1321.59	2100.86
Cenpm	102.282	2.29929	0.613691	3.74665	0.00017921	0.00333397	84.1372	132.084	117.189	24.1186	14.7274	155.456	68.1906	250.201	32.1114	145.198	60.463	201.77	70.3376	70.134	96.2923	114.095
Gm17296	608.614	-0.912959	0.243657	-3.74691	0.000179027	0.00333397	447.928	518.786	574.694	804.063	739.892	670.791	630.794	448.697	492.988	847.881	483.878	470.051	1028.92	616.914	454.052	507.499
Rpl36	3170.78	0.615814	0.164363	3.74667	0.0001792	0.00333397	3135.5	3924.87	2696.86	2258.41	2730.2	5087.74	2643.54	4300.16	2476.75	2843.72	2299.59	4094.36	2539.42	2428.74	3021.46	4251.14
Zfp12	477.053	-1.10891	0.29596	-3.74683	0.000179082	0.00333397	189.18	394.347	372.898	683.226	689.091	396.417	658.087	303.701	626.731	519.912	350.359	395.113	548.929	558.241	504.353	442.26
Bhlha15	40.1291	3.57197	0.953483	3.74624	0.000179508	0.00333516	182.957	19.2562	7.63714	11.4238	6.47406	208.666	13.5752	43.5049	33.4563	7.04889	3.52338	43.4597	4.75251	10.7649	13.1482	32.4173
Bivm	646.252	-0.626294	0.167254	-3.74457	0.0001807	0.00335017	414.737	683.923	628.014	614.761	760.172	541.48	645.031	414.651	808.487	894.102	795.632	568.872	783.864	615.708	637.5	533.099
Rbm48	173.551	-0.905751	0.241891	-3.74446	0.000180785	0.00335017	127.933	113.555	177.952	262.477	199.099	143.483	218.613	121.986	211.923	130.699	247.782	108.992	211.055	186.927	186.909	127.43
Dpcr1	134.851	2.19909	0.587575	3.74265	0.000182092	0.00337	619.844	130.263	140.332	65.9068	49.9427	78.6596	59.7309	157.812	88.5608	117.817	44.6295	164.689	88.7134	53.8247	143.754	153.144
Coro1b	7597.04	0.675152	0.180515	3.74014	0.000183914	0.00339932	12666	6743.07	6856.02	5927.7	6263.59	7452.14	7048.56	10190.7	6653.59	8830.87	7991.67	7606.47	6882.99	6225.83	6416.82	7796.6
Thoc7	29.8941	18.1852	4.86402	3.73871	0.000184964	0.00341429	0	148.386	0	0	0	0	192.768	0	0	0	0	34.3103	0	0	0	102.841
Mars	2778.09	0.735266	0.196712	3.73777	0.000185659	0.0034227	3231.19	2869.79	2551.42	2230.85	2320.02	4293.9	2154.53	3647.78	1659.59	2575.18	2081.6	3994.62	1982.33	2239.98	2518.92	4097.76
Slc43a2	1950.41	-1.73556	0.46501	-3.73231	0.000189733	0.0034933	733.914	1085.77	1224.38	4842.29	5283.45	1101.11	3050.55	1376.68	2385.22	1017.97	1334.79	1395.71	1557.25	2122.52	1473.83	1221.18
Frmd4a	314.841	-1.34775	0.361347	-3.72978	0.000191645	0.00352358	138.149	321.841	270.205	407.385	731.806	390.839	203.117	191.786	182.979	452.211	291.375	261.989	370.843	276.084	224.512	322.339
Rnf24	1027.89	0.942346	0.252675	3.72948	0.000191872	0.00352358	1393.3	807.694	1232.55	653.549	745.355	994.713	1192.38	1049.17	596.346	862.985	1267.2	1678.82	744.843	1234.82	1049.55	942.979
Odf2l	613.215	2.52103	0.676596	3.72604	0.000194509	0.00356742	4096.64	222.209	431.526	399.767	183.662	233.836	281.598	443.463	513.758	419.729	724.452	386.432	274.346	543.714	292.186	364.125
Lce3b	8.25594	7.72319	2.07475	3.72248	0.000197277	0.00361354	97.7871	0	5.72785	0	0	1.09249	13.5752	3.41215	1.96802	0	2.34892	0	0	3.31229	1.7531	1.11784
Snx10	1102.24	-0.760746	0.204448	-3.72098	0.000198454	0.00363044	637.165	1164.86	1171.5	1533.72	1226.95	748.457	1340.49	769.497	1121.57	1082.84	1383.06	959.689	1255.61	1165.87	1205.15	869.351
Cdk16	4115.9	0.53026	0.142558	3.71961	0.000199533	0.00364551	5083.15	4553.29	4199.96	3105.32	3227.21	5502.94	4028.7	4649.4	3595.22	4453.23	3629.23	4642.54	3617.94	3626.38	3928.82	4011.12
Smek1	1142.67	-0.576606	0.155036	-3.71917	0.000199878	0.00364713	1056.86	893.188	1150.52	1621.36	1131.88	803.699	1138.7	833.37	1375.2	1350.94	1328.99	908.109	1411.29	1150.59	1359.14	768.822
Paxip1	823.02	-0.408914	0.110001	-3.71735	0.00020132	0.00366408	656.12	812.16	950.823	996.511	957.236	824.833	774.692	728.493	792.127	783.434	772.795	750.252	887.134	834.697	895.833	751.187
Ptgs2	2247.24	2.31192	0.621897	3.71752	0.000201185	0.00366408	1092.64	1233.12	2569.8	504.414	860.392	5319.54	3045.25	3353.58	506.398	1235.76	2115.43	6768.53	893.647	2245.48	1578.84	2632.97
Cstf2t	1092.24	-0.98843	0.265988	-3.71607	0.000202345	0.00367721	547.292	1018.31	835.312	1676.67	1693.43	901.307	1083.3	963.931	1376.63	1450.06	842.088	916.085	1453.47	1153.51	809.931	754.541
Pla2g2d	73.0943	-2.99405	0.805831	-3.71548	0.000202815	0.00367721	0	14.0135	67.5839	227.54	71.0921	55.0197	95.2848	27.9954	64.869	95.7957	44.6149	35.5398	216.193	65.7721	28.4178	59.7768
Sh2d5	231.032	1.76982	0.476333	3.71552	0.000202787	0.00367721	242.185	140.14	194.801	59.0112	163.871	524.845	341.998	380.21	141.024	102.443	109.244	407.941	80.6192	178.718	269.192	360.272
Gm3636	51.2091	-2.22444	0.599426	-3.71095	0.00020648	0.00373891	14.9336	91.9428	18.5717	105.829	72.205	54.6517	67.0712	18.1755	54.6942	15.8585	65.7375	26.4871	104.93	41.016	34.1049	33.1375
Psrc1	76.7833	1.67914	0.452527	3.7106	0.00020677	0.00373942	52.3112	137.911	80.5742	26.3243	13.636	108.179	36.9998	118.148	84.0728	83.651	67.7659	89.8039	41.2763	97.5538	59.447	130.878
Ubc	65537.8	0.555598	0.149885	3.70683	0.00020987	0.00379068	90243.2	61797.2	63764.7	49489.4	54237.8	78130.1	68967.3	75351.4	48209.9	54084.5	64027	75661.2	60413.5	59761.4	68615.7	75851.2
Gcnt3	5246.84	2.62153	0.707632	3.70465	0.00021168	0.00381853	29433.9	6186.91	3764.15	747.822	2443.49	7048.77	1906.86	1974.78	6477.73	2739	3269.7	5123.67	2744.57	2338.48	3233.59	4516.07
Syngap1	127.353	-2.25152	0.608064	-3.70277	0.000213256	0.00384211	14.0864	76.8954	51.8452	352.647	396.594	138.556	115.854	98.5059	62.983	159.224	109.343	66.5479	112.919	99.7945	96.6229	85.2353
Dync2li1	635.444	-1.34496	0.363351	-3.70153	0.000214301	0.00385608	197.151	502.927	531.736	1371.74	1312.38	508.01	616.314	624.423	528.413	595.128	591.928	474.626	618.618	528.31	533.818	631.579
2010109I03Rik	989.729	5.04638	1.36355	3.70091	0.000214826	0.00386064	8858.72	46.717	766.409	150.704	32.4177	456.543	551.315	73.5003	263.938	94.6311	2547.43	1395.75	129.404	240.79	80.5572	146.834
Gp1bb	16.5027	5.41049	1.46255	3.69934	0.000216159	0.00387029	52.5615	0	11.2685	0	2.64186	0	13.7875	44.9275	17.8017	21.0938	76.0426	13.0676	0	0	10.85	0
Lrrc48	96.4029	-1.74435	0.471522	-3.69939	0.000216115	0.00387029	35.2614	44.2208	58.9973	228.257	201.62	86.5128	113.596	52.7829	98.8518	88.4496	99.1816	59.8147	68.8879	117.025	78.4068	110.581
Mgat5	2234.62	1.22231	0.330443	3.699	0.000216448	0.00387029	5532.77	2402.94	1649.28	1512.89	1552.76	2672.51	1906.28	1790.51	1599.7	1995.65	2621.27	2863.12	1298.04	2268.88	1689.23	2398.15
Olfr77	105.08	0.792879	0.214332	3.69931	0.00021619	0.00387029	134.063	149.519	92.6003	66.7855	73.0644	156.227	82.3562	105.777	94.4648	115.803	92.7823	132.666	73.6638	71.2142	101.68	138.612
Fasn	2423.58	1.54093	0.416898	3.69619	0.000218857	0.00390848	2004.03	3358.28	2272.64	1281.43	1276.48	3130.66	1657.6	8054.3	1591.72	2333.99	1659.81	2871.67	1883.95	1432.49	1754.3	2213.96
Smad6	304.179	-1.20369	0.325698	-3.69574	0.000219251	0.00391062	156.144	350.01	239.615	210.902	365.322	290.603	333.045	179.138	325.707	592.107	358.21	128.092	491.884	311.355	278.743	255.985
Recql4	125.358	1.3551	0.366918	3.6932	0.000221452	0.00394494	132.486	228.809	185.201	53.6042	54.5671	230.516	70.5911	189.374	74.7847	76.5308	57.5485	187.563	91.0897	91.9161	115.704	165.44
Zc3h7b	3091.31	-0.937736	0.254055	-3.69107	0.000223312	0.00397312	1264.92	3246.37	2813.33	3882.35	4541.09	2690.81	3189.27	2644.41	2781.79	4321.98	3394.19	2139.82	3174.67	3084.57	3231.84	3059.52
Tpst1	242.016	1.11377	0.302076	3.68706	0.000226862	0.00403125	227.144	376.179	352.975	122.205	148.445	231.208	169.484	358.97	212.796	199.083	284.076	260.164	122.363	237.681	262.397	307.091
Cybrd1	64.3771	4.7557	1.29013	3.68622	0.000227606	0.00403944	798.069	23.7871	2.86393	8.78757	11.0984	126.729	6.33509	10.2364	5.90405	6.04191	2.34892	8.00573	10.2971	0.828073	0.876549	7.82487
Prl2a1	89.0954	5.43217	1.47423	3.68475	0.000228926	0.00405533	555.178	11.3272	125.058	0	0	13.1099	53.3958	98.0992	3.93603	4.02794	351.164	139.529	18.2179	19.8737	23.6668	8.94271
Prl6a1	7.8663	4.7638	1.2929	3.68459	0.00022907	0.00405533	23.913	6.1335	6.20308	0	1.0016	3.54941	7.33432	24.0191	0	0	8.90332	26.0099	1.7156	1.79355	10.442	4.84234
Rab37	82.748	4.39897	1.1941	3.68392	0.000229677	0.00405601	996.663	6.85026	39.1303	23.029	13.9831	3.3035	8.51914	15.4765	20.8282	11.1647	94.1127	12.6803	11.5367	40.063	13.1066	13.5205
Rpl10a	10866.3	0.681184	0.184903	3.684	0.000229602	0.00405601	9957.8	14138.8	7966.52	8723.23	8838.27	19562.9	9870.57	14968.8	8193.46	8402.88	8283.07	14773.8	7202.04	7915.95	8815.05	16248.1
Ly75	468.16	-1.93481	0.525425	-3.68237	0.000231079	0.00407573	69.7581	402.022	496.462	598.474	889.625	288.342	243.629	337.595	311.769	499.021	1140.08	166.569	715.094	550.033	449.771	332.312
Mrpl12	2385.28	0.374104	0.101653	3.68021	0.000233041	0.00410526	2691.72	3015.84	2494.75	2060.66	2156.92	3009.92	2097.54	2900.36	1791.16	1850.11	1933.01	2873.53	2316.25	2056.95	2207.79	2707.99
Fgd1	58.7627	-2.38389	0.647907	-3.67937	0.000233806	0.00411213	14.3728	102.077	25.1317	45.9151	94.0534	48.6759	11.9126	17.2745	34.8953	172.342	63.5687	16.672	113.118	51.6357	31.235	97.3233
Gclm	3393.54	-0.60731	0.165068	-3.67916	0.000234007	0.00411213	3235.74	2376.94	2987.41	5265.89	3836.57	3194.77	3080.98	2962.04	3009.49	2982.98	3655.73	3076.66	5022.29	3684.13	3077.83	2847.12
Pkp3	4660.52	0.610776	0.166066	3.67791	0.000235151	0.00412714	7131	4499.49	4606.78	3498.33	4236.03	3901.35	4899.96	5700.9	4186.77	4298.12	5053.91	5014.09	3948.26	4141.66	4248.7	5202.93
2310047M10Rik	618.296	1.01012	0.274713	3.67701	0.000235986	0.00413672	1488.89	534.644	562.284	413.895	466.132	620.537	559.298	715.698	461.5	595.128	512.065	654.183	536.241	532.451	624.979	614.811
Ovol1	434.383	1.47148	0.400594	3.67324	0.000239491	0.004193	1003.11	182.368	416.224	391.926	228.442	506.917	376.486	702.902	440.836	313.172	610.719	551.252	193.269	274.092	339.224	419.189
Sppl3	2497.12	-0.644813	0.175571	-3.67266	0.000240043	0.00419752	1862.38	2298.84	2110.64	3157.78	3182.49	2992.84	2831.42	1978.5	3078.26	2202.72	2223.68	1889.25	2620.35	2624.36	2394.02	2506.43
Galnt11	666.761	-0.840639	0.229063	-3.66991	0.000242638	0.0042377	420.122	511.568	811.889	979.731	861.152	684.861	711.514	514.714	766.546	517.717	546.787	441.068	626.923	815.076	678.361	780.139
Pogz	1097.81	-0.796107	0.217088	-3.66721	0.000245209	0.00427737	576.667	963.956	971.298	1366.02	1203.41	1054.85	1223.44	690.262	1494.98	1169.94	977.748	886.614	1173.06	1221.39	1524.42	1066.83
Ppa1	1712.88	1.14589	0.31251	3.66672	0.000245686	0.00428045	3785.43	2291.68	2093.09	1205.54	1010.74	1866.06	1155.94	1998.87	716.778	1123.58	1435.75	2072.02	1332.16	1486.2	1657.98	2174.33
Dusp6	2966.23	1.48932	0.406271	3.66583	0.000246534	0.00428999	8997.99	2701.54	2976.57	1788.27	1480.71	4059.71	2467.07	2347.56	2196.31	2124.74	3656.09	3274.35	1936.65	2257.33	2212.41	2982.39
Ajuba	6053.7	-0.782611	0.213523	-3.66523	0.00024712	0.00429495	3655.98	5221.84	5619.98	7079.27	8156.39	4225.77	7154.13	4481.85	7969.49	7141.53	6305.68	4755.41	6948.16	5973.72	4917.44	7252.54
Usp33	1385.21	-0.703346	0.192055	-3.66222	0.000250039	0.00434039	979.277	1222.38	1210.25	1990.45	1624.27	1325.89	1464.01	1054.59	1655.32	1230.35	1385.26	1193.61	1642.59	1779.95	1459.04	946.064
Fgfr3	257.264	-3.17352	0.867056	-3.66011	0.000252109	0.00437101	49.3331	76.8955	72.5483	779.532	480.152	481.148	216.94	29.9783	493.418	569.103	25.1338	75.6704	123.096	212.74	188.22	242.309
Myo9b	3409.44	-0.589284	0.161143	-3.65691	0.000255273	0.00442051	2661.14	3390.96	3191.75	4002.23	4991.3	3177.96	3805.13	2696.92	3380.1	3111.84	3160.95	2854.7	3364.52	3754.07	3046.58	3960.97
Esrp1	5873.12	0.620168	0.16983	3.65169	0.000260519	0.00450587	7321.08	6542.93	6148.13	4576.46	4553.63	7197.03	6322.18	5678.36	6649.76	4293.05	5598.53	7101.08	3944.83	6307.59	5941.82	5793.51
Focad	624.677	0.806436	0.22091	3.65052	0.000261712	0.00451201	691.02	591.31	638.076	437.27	476.571	1069.56	681.151	787.962	536.066	498.076	513.382	759.752	367.81	489.35	523.65	933.827
Grk4	101.509	-1.72395	0.472219	-3.65075	0.000261475	0.00451201	46.5184	43.6888	125.705	177.715	96.2486	20.1099	113.16	49.1379	149.495	81.1695	227.918	47.0111	197.79	145.343	57.2346	45.9061
Myh15	11.0465	-4.74861	1.30084	-3.65041	0.000261822	0.00451201	3.15442	11.3272	4.77321	61.513	20.347	4.36998	3.62005	0.853037	6.88806	10.0698	10.5701	0	15.0496	20.7018	3.5062	0
Arhgap39	282.445	-0.882679	0.241902	-3.6489	0.000263362	0.0045276	160.223	294.135	204.674	424.109	394.192	306.406	353.054	231.06	304.117	266.179	207.009	216.755	311.225	284.908	241.306	319.766
Plekhb1	288.788	-2.80513	0.768756	-3.64892	0.000263347	0.0045276	16.3943	472.978	184.709	537.269	921.72	471.089	139.683	99.1477	118.495	55.1494	426.328	123.202	216.109	450.075	154.063	234.196
Wdr41	543.465	-0.521801	0.143026	-3.6483	0.000263981	0.00453279	435.286	573.125	517.393	701.945	673.151	483.949	570.926	513.501	517.564	385.656	474.359	492.897	700.224	499.649	553.956	601.855
Katnal1	239.39	-1.79546	0.492187	-3.64793	0.000264363	0.00453388	42.776	202.025	152.017	453.532	341.227	303.616	247.271	80.3053	333.831	241.568	122.079	171.059	245.197	346.552	345.866	201.314
Lrba	3316.54	-0.874673	0.240075	-3.64333	0.000269134	0.00461017	2854.52	3093.04	2380.02	5556.16	5307.37	2537.81	4073.8	2959.52	3618.78	2727.73	3185.67	2232.18	3886.98	3511.52	3129.62	2009.93
Ube2n	357.199	-1.04454	0.286884	-3.64099	0.000271589	0.00464665	212.924	282.047	274.937	656.432	486.479	233.794	335.76	326.713	317.835	616.274	372.304	221.873	433.27	396.647	324.323	223.568
Ccny	967.787	-0.623934	0.171389	-3.64045	0.000272158	0.00465081	921.092	897.114	869.679	1414.8	1181.05	808.445	1056.15	798.442	1137.51	1099.63	870.275	757.114	1216.64	963.877	851.129	641.639
Aurka	1017.26	1.33937	0.368147	3.63814	0.000274609	0.00468708	1021.53	1551.75	1671.07	466.794	273.04	1267.07	701.051	1490.32	970.313	987.995	749.36	1298.87	765.947	904.83	985.638	1170.52
Crct1	65.2614	3.34727	0.920405	3.63673	0.000276117	0.00470719	259.859	42.315	151.205	7.58562	10.9289	16.0907	37.3821	80.3193	27.4083	21.8362	84.8183	52.9611	20.0108	57.5476	16.0736	157.841
Atp5b	34610.3	0.601298	0.16541	3.6352	0.000277765	0.00472963	42489	38838.3	34813.6	26922.5	26504.4	46179	29901.2	43475.4	30241.3	37272.7	24695.5	42785.9	31439.7	29473.9	33713	35020
Eif4a-ps4	7419.04	0.537514	0.1479	3.63431	0.000278728	0.00474036	8275.63	8412.71	8868.62	5008.92	6649.78	9461	6970.41	8900.58	5357.93	6549.43	5475.33	8860.06	6280.44	7015.43	8151.91	8466.51
Pik3r1	1456.73	-1.06712	0.293677	-3.63364	0.000279455	0.00474707	1376.87	936.924	1100.57	1998.41	1937.33	1055.09	1736.14	626.39	2169.79	1286.49	1712.28	852.995	2033.54	1774.4	1430.43	1280.06
Uts2	70.8508	4.45343	1.2263	3.6316	0.00028167	0.00477901	58.3568	53.2378	11.4557	1.75751	14.7978	512.38	78.7362	113.454	12.7921	2.01397	1.17446	187.563	0	7.45265	23.6668	54.7741
Arid2	1560.38	-0.86979	0.239598	-3.6302	0.000283202	0.00479327	1478.81	1388.21	1107.53	2272.88	1969.94	1108.63	1587.69	749.405	1807.24	1859.19	1852.82	1187.61	1987.74	1784.53	1645.46	1178.32
Bbs1	203.366	-1.41673	0.39035	-3.62939	0.00028409	0.00479327	72.5517	130.263	105.011	396.319	421.739	176.984	155.662	165.489	279.458	278.935	146.808	149.822	224.16	222.752	169.174	158.733
Cox15	1276.24	0.53487	0.147339	3.63021	0.000283191	0.00479327	1629.03	1109.9	1213.7	1117.47	1078.1	1259.37	1426.09	1649.39	1199.31	1334.13	1026.68	1697.08	1237.81	1009.42	1277.33	1154.97
Snrnp25	306.315	0.799025	0.220159	3.6293	0.00028419	0.00479327	381.565	433.327	350.501	256.44	184.601	370.419	231.734	429.271	261.28	178.254	198.789	385.536	246.941	341.925	313.851	336.6
Zfp235	138.03	-0.685939	0.188991	-3.62949	0.000283983	0.00479327	104.096	91.7503	122.194	187.175	153.528	80.8445	148.422	111.748	181.058	164.138	186.739	96.0688	162.377	158.99	154.273	105.077
Oser1	1332.43	0.754512	0.20794	3.62851	0.000285063	0.00480184	1883.56	1087.2	1250.89	1064.32	1009.97	1774.37	1244.95	1422.42	1497.85	1246.66	1187.94	1759.97	926.514	1010.04	1108.27	1843.98
Rdh11	2291.4	1.4699	0.405128	3.62823	0.000285371	0.00480184	3642.92	2901.34	2640.71	909.424	734.816	4123.01	1599.95	2271.25	1256.61	2572.8	923.482	3296.72	1679.89	1723.92	2886.09	3499.52
Plekhh3	872.044	1.13121	0.311949	3.62626	0.000287558	0.00482725	2208.03	694.32	837.933	614.915	550.644	1028.5	653.779	1070.09	595.638	685.469	979.073	1053.56	808.479	647.142	774.525	750.592
Spag6	30.7217	-3.04853	0.840653	-3.62638	0.000287422	0.00482725	4.03805	16.8365	17.387	131.594	105.853	9.21685	19.8238	10.2582	23.6665	2.57813	28.247	22.6262	41.3684	31.1332	6.1715	20.7491
Dhcr24	11168.1	0.731965	0.201881	3.62572	0.000288155	0.00483159	12556.2	16314.6	13037.5	9872.84	7999.16	9979.93	11478.3	14491.4	10082.2	8253.24	8871.87	13255.2	6395.29	10717.7	12213	13171.5
Clic6	221.759	-6.85999	1.89249	-3.62485	0.000289133	0.00484231	0	282.031	0.738821	410.245	1244.74	1207.07	112.668	1.98056	30.6255	53.7738	5.45367	12.3917	37.3939	26.2755	122.764	0
Rpl27a	8141.44	0.670179	0.185012	3.62235	0.000291937	0.0048778	8172.54	10323.9	6941.21	6088.17	6054.87	12968.3	6950.64	11402.2	5818.29	8111.77	5361.91	10304.5	6636.65	6494.03	7952	10682.1
Znf512b	696.698	-1.48791	0.410738	-3.62253	0.000291739	0.0048778	278.399	544.255	441.968	976.049	1182.1	645.266	702.839	277.457	1641.69	1014.71	414.195	484.113	758.492	626.554	711.582	447.504
Ftl1	41267	0.635048	0.175369	3.62122	0.00029322	0.00489351	60823.6	39434.5	39600.5	27506.9	33924.1	56858.8	38917.4	47930.4	35676.2	32779.4	31447.3	50177.7	40904.8	38184.9	40269.5	45835.8
Rpl39	5466.2	0.677792	0.187353	3.61772	0.000297206	0.00495424	5663.77	6891.4	4650.81	4464.04	4564.29	8313.12	4490.62	8378.99	4045.12	4984.62	3050.98	7085.23	4182.93	4337.33	4678.28	7677.65
Rpl32	10295.8	0.625279	0.173066	3.61296	0.000302721	0.00504028	10021.6	12640	9176.97	7723.4	8211.88	16446.4	9282.72	13990.7	7330.86	9691.22	6952.8	13193.5	8188.57	8370.99	9952.34	13558.3
Fcgr3	41.6316	3.93201	1.08865	3.61183	0.000304041	0.00505637	214.126	86.5478	23.314	6.00523	10.0807	5.19916	22.7611	55.9587	48.5211	70.4798	13.4832	3.47361	1.88476	35.0171	35.1952	34.0584
Wisp1	20.6961	-4.54211	1.25781	-3.61112	0.000304882	0.00506445	0	13.0022	5.12193	156.262	33.3174	7.41126	9.01765	5.88444	4.52528	6.17459	22.2787	1.75319	3.92557	48.8601	8.06218	5.54001
Mettl7b	491.021	3.24916	0.9	3.61018	0.000305989	0.00507692	3976.15	35.1143	203.339	148.51	15.7227	255.644	162.902	293.445	251.906	197.369	311.232	985.849	388.121	270.78	128.853	231.393
Rps18-ps1	11.6816	3.30242	0.914843	3.60982	0.000306405	0.00507792	59.934	9.06176	8.59178	0	2.7746	9.83244	5.43008	11.9425	5.90405	11.0768	9.39568	20.5862	6.33667	3.31229	14.9013	7.82487
Tinf2	728.414	0.872204	0.241649	3.60938	0.000306931	0.00508074	638.771	919.768	1001.42	424.44	379.195	941.73	728.536	1031.32	815.743	628.358	597.8	808.579	552.083	610.29	696.857	879.739
Flii	7201.54	0.521468	0.144491	3.60899	0.000307395	0.00508252	10636	7585.57	7275.85	5750.66	6468.79	8549.34	6677.02	8550.93	6489.23	5948.62	7168.9	7618.77	6450.9	5911.45	6293.39	7849.23
Prdm11	87.6848	-2.63784	0.730981	-3.60863	0.00030782	0.00508365	10.9416	61.37	35.461	108.26	144.126	215.382	128.429	22.4496	41.2126	280.923	95.4545	16.7919	64.9625	37.5315	62.1834	77.4777
Tnfrsf10b	1547.7	0.568325	0.157594	3.60626	0.000310643	0.00512435	2160.78	1417.03	1574.2	1343.62	1255.97	1861.61	1614.54	1803.32	1577.37	1499.4	1700.62	1608.01	1155.65	1344.79	1448.94	1397.3
Edem1	2177.63	1.26569	0.351144	3.60448	0.00031278	0.00515365	5342.02	2011.71	2308.32	1393.71	1068.22	3067.72	1769.3	1676.22	1781.06	1634.34	2411.17	2565.27	1521.59	1999.8	1737.32	2554.26
Erlin2	3954.03	-0.386848	0.107335	-3.6041	0.000313234	0.00515517	3898.87	3921.47	3593.27	4194.31	4603.05	3678.43	4074.37	3059.84	4266.66	4336.07	4472.34	3206.87	4480.03	4016.98	3897.14	3564.79
Rps20	10366.9	0.827106	0.229603	3.60233	0.000315379	0.00518032	10627.4	12881.5	10028.5	8093.03	9045.43	16122.2	10287.6	16890.4	6807.44	5242.66	8055.56	13087.4	5752.27	8448.67	10599.9	13900.4
Tspyl3	53.9088	-5.15475	1.43098	-3.60224	0.000315488	0.00518032	6.30885	7.92904	13.365	55.3617	207.17	108.157	175.573	7.67733	8.85608	17.1187	7.04676	0	236.833	1.65615	6.13584	3.35352
Zfp60	287.505	-1.00217	0.278345	-3.60046	0.00031766	0.00520998	220.413	192.189	209.846	464.664	321.927	210.668	389.515	185.524	405.429	369.258	252.059	167.707	352.457	388.039	293.52	176.861
Gpx8	22.4532	-6.79476	1.88967	-3.59573	0.000323482	0.00529939	0	12.4599	11.4557	0	12.0232	6.55496	0	0	5.90405	157.09	81.0377	0	58.6142	4.14036	4.38275	5.58919
Zfp329	130.154	-1.22682	0.341394	-3.59356	0.000326188	0.00533147	107.213	103.198	101.653	213.446	134.24	140.863	82.7773	66.1746	184.386	161.832	261.288	62.2005	183.525	104.11	112.584	62.9681
Zfp422	1114.32	-1.03855	0.288991	-3.59371	0.000325999	0.00533147	703.975	1176.39	927.112	1736.17	1792.88	952.299	790.723	951.73	1326.72	1586.42	640.243	748.528	1413.55	1102.47	1083.1	896.842
Gm7536	7152.23	0.67918	0.189101	3.59162	0.000328628	0.00535908	7117.96	8608.67	6790.37	5254.09	5576.94	11250.5	6115.18	10181	4979.08	6799.16	4556.9	9242.05	5747.36	5670.64	6990.48	9555.28
Tacc3	1592.81	1.42974	0.398064	3.59173	0.000328486	0.00535908	1465.58	2379.04	2256.71	800.393	387.511	2025.58	817.801	2624.19	1109.84	1204.85	1453.88	2163.52	1133.27	1525.08	2053.57	2084.17
Dedd2	574.547	1.09479	0.304974	3.58979	0.000330941	0.00539064	1392.68	513.122	466.82	382.259	527.173	748.358	430.786	538.266	449.692	429.982	615.417	866.907	398.418	458.752	396.2	577.922
Snx25	578.026	1.24954	0.348253	3.58804	0.000333176	0.00542086	1624.36	350.164	499.493	406.408	475.109	595.384	441.601	577.509	443.073	547.712	626.763	723.137	346.398	537.247	454.912	599.153
Bik	59.7423	-2.44365	0.681336	-3.58656	0.000335073	0.00544425	12.6177	29.4507	11.4557	255.718	189.597	9.83244	29.8654	37.5336	68.8806	58.4051	116.272	37.7413	38.02	11.593	25.4199	23.4746
Fbxw2	1715.11	0.46693	0.130198	3.58632	0.000335377	0.00544425	2282.15	1973.02	1814.96	1307.3	1533.19	1780.37	1634.56	1866.65	1497.94	1809.98	1649.51	1788.56	1448.62	1548.12	1606.87	1899.98
Kdm5c	5146.01	0.763275	0.212948	3.58432	0.000337952	0.00547982	5828.61	5967.1	4218.39	2927.46	3875.62	7322.52	3991.29	6052.29	3913.02	4907.49	5576.11	6889.15	4256.2	6135.25	4211.85	6263.84
Zfyve28	11.4786	-3.73701	1.04272	-3.58389	0.000338513	0.00548268	5.78137	2.98968	7.39296	51.9763	17.5579	1.70878	19.0901	2.2919	5.8707	20.8441	1.89329	0	26.4584	11.6606	4.59034	3.55071
Slc2a1	9835.98	1.43485	0.400395	3.58359	0.000338903	0.00548277	13558.5	7056.9	9217.77	6030.41	5497.88	27360.5	7124.5	11081.4	4619.29	4663.85	8724.15	17187.2	3943.02	7628.92	7275.94	16405.4
Pgam1	15609.5	1.35681	0.378651	3.58329	0.000339295	0.0054829	14746.9	15472.9	12797.9	6017.73	9628.77	31757.7	14759	30636.8	8469.36	17435.9	7134.84	20869.8	10222.6	13307.1	16298.6	20196
Akap5	50.1005	-3.44082	0.96055	-3.58213	0.000340801	0.00548581	19.092	73.1086	26.9355	175.906	71.9454	4.27159	16.7827	1.33413	46.9387	29.9232	40.2305	10.7321	68.7344	56.9485	127.134	31.5915
Krtcap2	1888.97	0.822489	0.229589	3.58244	0.000340393	0.00548581	2743.16	1876.06	1910.63	1444.95	1151.65	3149.75	1466.22	2270.89	1990.32	1275.31	1492.14	2300.27	1537.67	1441.07	1641.78	2531.67
Prr15	302.85	1.80108	0.502819	3.58197	0.000341013	0.00548581	963.676	154.05	213.84	167.843	114.683	281.863	253.404	321.595	386.715	473.283	280.696	331.666	180.595	298.106	357.632	65.9525
Sertad3	488.728	0.84937	0.23709	3.58248	0.000340343	0.00548581	845.385	313.763	523.144	333.928	344.975	421.703	554.773	536.56	492.004	541.758	575.485	528.378	378.616	436.394	446.163	546.623
Npepl1	2215.1	-0.843641	0.235554	-3.58151	0.000341611	0.00548925	993.687	1883.69	2091.09	2942.03	2947.33	2096.92	1810	1831.03	3186.27	2345.91	2469.34	2153.27	3052.24	1771.38	1836.55	2030.92
Psmd4	3882.25	0.401862	0.112226	3.58084	0.000342491	0.00549719	4266.15	4236.07	3779.03	3596.04	3661.69	4419.59	3579.06	5347.95	3013.85	3195.31	3532.23	4297.92	3278.7	3606.33	3679.72	4626.38
Dcdc2a	14.3872	-5.53973	1.54739	-3.58005	0.00034353	0.00550768	0	12.3512	0	39.8754	94.3663	38.6067	10.2341	3.10132	0	0.272514	0.95351	0.928518	10.5722	0.224096	10.2817	8.42717
Spred1	922.174	0.524481	0.146534	3.57923	0.000344604	0.00551869	708.545	1158.21	968.619	658.523	561.8	1200.58	978.832	990.059	1013.64	949.215	814.235	939.396	618.847	1071.25	1031.11	1091.91
Gm28046	19.5893	-7.94907	2.22317	-3.57555	0.000349488	0.00559063	0	0	39.1403	22.8477	10.1735	0	0	0	15.7441	51.3562	48.1529	0	124.357	1.65615	0	0
Cenpa	747.965	1.39713	0.391159	3.57176	0.000354588	0.00564689	650.458	1151.1	985.307	269.84	198.469	1034.27	421.938	1116.85	605.518	690.313	554.82	1005.27	584.377	759.515	967.022	972.365
Rrbp1	13282.6	0.85438	0.23919	3.57197	0.00035431	0.00564689	25824.9	10788.6	14560.3	8841.05	12299.1	14738.2	13483.4	15270	11089.1	11427.2	13943.5	14183.7	9433.29	13529.9	11544.3	11564.4
Tmem199	731.905	0.493648	0.138192	3.5722	0.000353996	0.00564689	839.896	833.144	772.912	602.152	635.467	772.885	690.307	973.644	557.358	583.049	739.746	771.175	601.019	766.366	722.56	848.802
Tmem54	1212.88	1.69339	0.474093	3.57185	0.000354462	0.00564689	2910.99	640.736	1736.97	773.861	395.78	1255.99	2186.69	1348.66	1709.84	623.201	1059.96	1599.46	641.278	761.628	1113.53	647.487
Arg2	43.0617	1.6577	0.464388	3.56965	0.000357458	0.00568625	50.4708	37.3797	47.7321	18.4539	28.6708	61.1797	41.6306	63.1247	38.3763	14.0978	36.4083	81.201	15.0496	67.902	60.4819	26.8281
Ces2a	584.376	3.26437	0.915092	3.56726	0.000360738	0.00572567	5043.59	474.308	301.664	116.842	115.631	186.455	125.721	468.547	265.207	86.1768	479.735	531.377	396.176	356.333	366.739	35.5165
P4ha3	44.2696	-5.08787	1.42621	-3.5674	0.000360541	0.00572567	2.04303	12.4719	21.1719	11.1642	5.02542	2.3745	2.95053	5.56215	1.48954	161.195	16.5923	4.97149	422.168	18.2352	11.4309	9.46776
Ift81	419.715	-0.942827	0.264392	-3.56601	0.000362451	0.00574417	268.276	277.206	506.451	708.003	507.669	225.583	547.015	302.731	622.15	300.055	530.643	314.867	489.093	473.376	385.893	256.424
Lrrc59	8204.05	0.609179	0.170847	3.56564	0.000362969	0.00574417	12002.5	9782.5	8666.37	6606.96	6809.73	11385.5	6704.86	8328.11	5448.17	6598.87	7467.36	10560.2	6830.39	6695.78	7222.26	10155.3
Map4k5	1388.48	-0.503348	0.14117	-3.56554	0.000363112	0.00574417	1080.75	1135.41	1337.55	1594.08	1444.96	1180.27	1349.14	1048.46	1507.62	1515.67	1727.75	1094.97	1530.18	1527.36	1869	1272.52
Arhgdig	164.761	1.59733	0.448191	3.56396	0.000365303	0.00576789	194.046	289.315	136.352	38.9211	132.903	265.763	117.153	367.861	93.9842	130.699	149.151	173.702	72.0868	200.519	112.441	161.286
Ttc3	1742.8	-0.789032	0.221397	-3.56388	0.00036542	0.00576789	1006.84	1177.68	1196.72	2294.54	2253.14	1005.58	1852.41	1683.69	2613.72	1956.66	2413.12	1300.77	2360.9	1678.76	1964.41	1125.9
Por	9617.63	0.776272	0.217868	3.56304	0.000366583	0.00577987	13495.5	9385.03	8950.1	5099.04	8379.04	12078.9	10457.8	12193.2	7935.6	8002.04	9963.76	10598.9	7708.6	7870.28	11639.3	10125
Dzip1l	715.361	-1.13437	0.318489	-3.56172	0.000368428	0.00578339	277.525	857.437	784.972	616.642	1385.07	629.411	680.997	455.221	660.458	888.245	599.023	572.214	868.335	773.593	612.224	784.402
Fkbp2	756.187	0.916299	0.257219	3.56233	0.000367578	0.00578339	1447.56	731.931	882.534	487.784	526.07	932.426	679.362	963.481	731.618	641.931	468.473	806.902	688.705	615.693	720.564	773.953
Gm10182	21.6653	17.347	4.8701	3.56194	0.000368121	0.00578339	18.9265	65.6977	0	0	0	1.09249	41.6306	0	0	0	152.68	0	0	0	66.6177	0
Rdm1	280.406	0.895239	0.251324	3.56209	0.000367916	0.00578339	315.622	345.05	259.18	167.572	150.213	448.73	247.357	338.916	269.23	278.291	449.038	312.74	203.156	231.109	196.81	273.483
Rpusd4	581.4	0.439196	0.123321	3.56141	0.000368873	0.00578401	606.527	682.806	603.048	447.737	491.057	645.067	586.012	665.433	555.304	569.079	569.369	662.084	489.793	473.158	619.405	636.52
Klk8	25.1536	2.83	0.79496	3.55992	0.000370969	0.00581049	44.1619	15.8581	13.365	11.4238	0	37.1448	29.8654	34.9745	18.6962	12.0838	12.9191	48.0344	6.33667	9.93687	27.173	80.4844
Dhcr7	2101.09	0.791094	0.222305	3.55859	0.000372848	0.00583007	2332.73	2999.46	2488.41	1506.74	1332.07	2582.3	1755.69	2513.58	2010.69	2292.6	1161.81	2530.69	1424.49	2032.75	2064.85	2588.64
Rplp2	11173.9	0.706095	0.198427	3.55846	0.000373036	0.00583007	11023.9	13470.4	10511.2	7934.34	8904.58	17477.1	9912.99	16260.5	7964.52	10780.3	6701.3	14150.9	8562.93	9135.53	11048.4	14943.7
Gm15772	10.8422	-6.36908	1.79001	-3.55812	0.000373517	0.0058312	0	0	9.54642	31.6353	2.7746	14.2024	12.6702	0	8.85608	7.04889	0	0	18.2179	32.2948	10.5186	25.7103
Pcmtd2	841.167	-1.07067	0.300936	-3.55781	0.000373953	0.00583162	353.149	728.318	488.486	925.008	1250.59	507.203	923.658	486.367	1552.93	1250.65	987.838	693.385	1041.48	888.096	769.427	612.084
Tbc1d10c	9.33676	6.58476	1.85148	3.55648	0.000375854	0.00585486	12.6177	11.3272	12.4103	0	0	0	19.0053	13.6486	0	13.0908	0	19.4425	0	10.7649	23.6668	13.4141
Ggps1	571.804	-0.450628	0.126806	-3.55367	0.000379893	0.00589206	492.09	446.291	587.105	771.549	633.533	525.49	610.884	481.113	600.245	610.232	637.732	538.672	660.598	533.279	590.794	429.25
Hspa1l	24.6076	-1.66007	0.467043	-3.55443	0.000378799	0.00589206	6.30885	20.389	23.866	24.6052	41.6189	14.2024	27.1504	12.7955	43.2964	40.2794	27.0126	9.14941	26.9309	26.4983	22.7903	26.8281
Ift122	870.374	-0.932329	0.262315	-3.55424	0.000379079	0.00589206	669.684	622.453	639	1364.22	1255.81	711.737	957.592	583.082	1123.97	1145.6	840.703	535.873	782.929	802.147	872.694	1018.5
Slc16a11	58.6642	-1.99388	0.56106	-3.55378	0.000379737	0.00589206	35.5982	117.938	69.231	148.809	144.209	50.7833	34.0967	28.8175	23.9556	35.7699	51.1529	22.9827	54.0574	56.6945	28.0877	36.4436
Sult2b1	934.543	1.47001	0.413748	3.5529	0.000381009	0.00589655	2586.63	1023.98	1411.92	519.345	408.79	622.722	736.681	903.366	850.183	631.379	736.386	1062.48	713.668	693.097	853.759	1198.32
Wdr35	858.512	-0.7854	0.221056	-3.55295	0.000380944	0.00589655	655.559	639.244	828.525	1432.65	1178.64	765.492	839.641	626.012	905.763	817.827	805.46	711.268	823.877	733.889	1067.84	904.506
Chst8	624.812	-2.78407	0.783998	-3.55111	0.000383608	0.00592392	121.513	228.324	314.505	1232.83	1672.62	809.266	851.98	139.394	1443.19	419.157	47.408	299.702	956.865	716.427	442.191	301.614
Tns3	8346.67	-0.493551	0.138977	-3.55131	0.000383312	0.00592392	6573.52	6848.42	8604.11	9546.53	9246.4	5937.54	8628.33	6164.94	9890.66	10170.9	11191.3	7544.5	9763.36	10000.9	7008.86	6426.35
Cdk19	1119.7	-1.14975	0.323924	-3.54946	0.000386027	0.00593243	449.27	1023.25	813.89	1916.63	1586.47	707.268	1586.42	1123.18	1153.45	836.45	1251.97	703.952	1556.91	1162.07	1189.06	855.05
Egfl6	181.34	3.52493	0.99313	3.54931	0.000386238	0.00593243	498.399	82.6885	87.8271	3.51503	5.54919	10.9249	247.974	365.1	132.841	48.3352	528.507	228.735	85.5451	274.092	241.051	60.3633
Micu1	5194.59	1.05215	0.296412	3.54963	0.000385778	0.00593243	11702.3	5329.71	5347.78	3089.53	3620.71	5798.7	4598.38	4978.27	4451.96	4379.04	6568.79	6192.54	4318.27	4465.77	3933.24	4338.49
St5	1999.73	-1.01714	0.286571	-3.54937	0.000386157	0.00593243	1024.1	1717.83	1779.57	2577.21	3802.76	1136.27	2181.95	1844.05	2252.15	2536.02	2169.39	1178.86	1817.87	2386.47	2128.56	1462.59
Tlk2	1097.19	-0.595919	0.167864	-3.55	0.00038523	0.00593243	980.3	949.338	798.528	1676.4	1340.87	902.863	1156.62	894.018	1212.62	1247.94	1016.22	984.107	1300.64	1131.16	1084.39	879.07
Arntl2	191.902	-1.74107	0.490706	-3.5481	0.000388022	0.00595343	22.5625	295.416	192.36	228.796	273.752	98.5275	257.638	134.582	142.167	158.766	128.027	90.5883	334.236	266.548	275.516	170.952
Prkacb	1194.98	-1.03829	0.292692	-3.54739	0.00038907	0.0059631	466.225	1163.03	930.811	1701.42	1753.75	1509.22	1265.18	1014.58	1192.88	1348.41	1268.29	874.185	1390.28	1299.72	1175.15	766.562
2210017I01Rik	9.8531	-5.11128	1.44162	-3.5455	0.000391863	0.00599945	0	3.39816	1.90928	92.2695	4.62433	0	6.33509	0.853037	13.7761	2.01397	2.34892	2.28735	16.6338	7.45265	2.62965	1.11784
Mtfr1	1545.1	0.642408	0.181234	3.54463	0.000393158	0.00601284	2199.73	1851.73	1721.24	1176.21	1206.93	1725.07	1347.87	1566.07	1267.5	1181.52	1733.22	1935.26	1265.98	1468.15	1554.21	1520.94
Sars	5982.03	0.826562	0.233264	3.54346	0.000394907	0.00602666	7014.8	5958.31	5454.59	3916.79	4424.65	12695.8	5135.79	6827.24	4082.15	4632.56	3950.57	8603.38	4314.91	4353.45	5615.3	8732.11
Tnfsf10	79.8515	-2.45332	0.692316	-3.54364	0.000394651	0.00602666	10.3015	17.5711	75.6233	279.805	100.428	32.3145	144.822	37.9473	107.148	24.9035	133.283	45.2065	131.924	52.7334	44.3701	39.2437
Kdm2a	3701.97	-0.585273	0.165189	-3.54304	0.000395536	0.00602982	2849.49	3651.29	3100.58	4381.2	4698.25	3416.43	4215.68	2667.89	3895.05	3966.57	4267.78	3254.84	4079.09	4430.43	3661.5	2695.4
Arpc3	6178.23	0.727437	0.205368	3.54211	0.000396939	0.00604475	9873.04	6473.37	6329.77	4810.31	5059.32	5259.67	5603.97	9951.27	5039.97	5047.31	6258.21	5742.22	5571.24	5376.47	6526.03	5929.54
Gpalpp1	1357.34	-0.644296	0.181999	-3.54011	0.000399958	0.00608422	1020.46	1311.69	1165.62	1717.97	1375.27	970.135	1618.16	958.813	2022.14	1772.29	1505.66	1009.87	1577.04	1451.61	1277.13	963.577
6430548M08Rik	426.557	1.9585	0.553429	3.53884	0.000401886	0.00610055	2031.14	218.241	320.291	193.381	249.42	293.253	445.241	270.652	427.676	237.221	492.694	427.395	258.685	408.414	337.457	213.739
Slc2a4	51.7655	-1.71749	0.485286	-3.53912	0.000401465	0.00610055	6.05553	32.7471	42.9075	90.0463	111.346	55.3508	61.9439	28.0547	56.6699	49.9685	54.9782	28.6984	39.0159	45.9768	72.8018	51.6866
Cfi	209.591	-3.55897	1.0059	-3.53808	0.000403051	0.00611172	7.88606	268.455	21.0021	426.197	966.484	193.371	111.317	46.917	301.107	69.4819	51.6762	75.4826	148.912	400.787	237.545	26.8281
Grin2d	42.4392	-2.71183	0.766537	-3.53777	0.000403521	0.00611236	17.3493	50.9724	41.0496	77.3306	37.9195	13.1099	51.5858	10.2364	55.1045	36.2514	25.8381	0	60.9905	52.1686	55.2226	93.8984
mt-Cytb	47915.7	-1.01939	0.288206	-3.53701	0.000404683	0.00612346	49527.6	36496.2	37349.4	91381.1	64181	26149.9	41457.8	28252.6	67871	49181.1	69171	28421.5	59707.3	53426.4	43345.4	20732.5
Pcnp	3038.87	0.399512	0.112963	3.53667	0.000405211	0.00612495	3598.21	3195.33	3389.64	2735.05	2614.87	3114.93	2791.66	3182.99	2520.46	3072.07	2955.63	3562.24	2486.56	2934.39	3218.87	3249.08
Tmed9	4724.01	0.498258	0.140965	3.53462	0.000408369	0.00616615	6136.93	4930.73	4732.16	3387.61	4387.56	6107.04	4881.64	5035.47	4536.28	4308.89	3906.25	5009.3	3677.65	4299.35	4474.78	5772.52
Dnah7c	14.4191	-5.35435	1.51522	-3.53372	0.000409749	0.00618045	0	10.2477	12.4684	29.8129	10.459	3.29459	43.0403	0	14.0953	6.83263	6.1981	0.862235	5.97164	77.2621	5.94759	4.21378
Ulk2	613.127	-0.814875	0.230684	-3.53242	0.000411771	0.0062044	348.45	525.904	509.906	814.783	815.735	482.724	784.591	433.456	905.811	599.924	640.027	572.718	758.304	604.478	552.228	460.994
Dhx33	838.461	-0.858301	0.243014	-3.5319	0.00041259	0.00621018	545.074	1200.56	900.34	1166.1	982.064	960.957	853.891	399.507	862.645	735.901	576.5	700.571	828.906	1038.57	847.473	816.322
Ddx5	18809.2	-0.510537	0.144582	-3.53112	0.0004138	0.00622182	18946.6	17547.2	17493.3	26002	23399	17448.7	19720.5	13468.6	20244.1	17041.2	19604.9	16476.7	20234.1	18670.6	18334.8	16314.4
Glipr1	1503.63	-1.62382	0.460694	-3.52472	0.000423924	0.00635797	395.017	1675.18	1168.37	2575.96	3463.48	1120.69	1589.64	1217.55	716.425	2294.78	1321.36	815.704	1456.39	978.108	1410.12	1859.24
Herpud1	5930.34	1.35152	0.383457	3.52456	0.000424192	0.00635797	10375.9	5105.77	4776.41	2266.21	4259.71	15356.1	5050.2	5604.33	4624.34	3944.55	3960.12	10605.7	3891.93	4225.14	4731.47	6107.44
L3mbtl3	449.317	-0.814673	0.231123	-3.52485	0.00042372	0.00635797	346.057	487.865	398.699	535.033	541.056	470.297	433.678	197.521	425.54	523.581	420.024	390.667	559.382	553.627	436.729	469.318
S100a6	14477.7	0.707243	0.200737	3.52323	0.000426322	0.0063832	25260.6	21309.9	14346.4	12037.2	11344.4	17565.1	12240.3	16769	11181.3	7811.18	10706.4	16033.2	12177.5	11003.4	12161.2	19696.3
Acsl5	5637.41	0.940549	0.267063	3.52182	0.000428588	0.0064104	9401.76	6925.45	6603.26	4123.13	2949.4	8226.48	4459	6495.02	4145.63	5181.94	3674.89	7638.61	5188.15	3839.77	5563.46	5782.58
Atp2b4	629.584	-3.09718	0.880036	-3.51938	0.000432552	0.00644997	219.445	198.993	33.7093	1135.61	1959.62	168.516	556.755	71.3422	1455.32	1556.08	76.9665	221.222	1167.85	634.977	394.139	222.796
Gm15443	26.0214	-2.29179	0.651196	-3.51936	0.000432589	0.00644997	4.73163	9.06176	25.7753	36.9078	12.0232	16.3874	18.1003	11.0895	50.1844	48.3352	34.0593	4.57471	54.6538	43.8878	29.8027	16.7676
Nemf	767.633	-0.697608	0.19819	-3.5199	0.000431709	0.00644997	589.877	693.224	710.254	1111.63	763.939	530.952	781.027	539.972	743.911	1063.38	852.658	618.729	958.422	804.059	958.945	561.155
Gcat	585.661	1.46687	0.416907	3.51847	0.000434041	0.00646486	936.283	779.451	873.096	209.473	211.005	786.234	319.703	724.562	381.188	514.461	261.678	1010.57	545.165	470.486	546.737	800.48
Cyc1	1770.05	0.603393	0.171704	3.51415	0.000441167	0.00656414	1902.12	1979.99	1913.1	1350.65	1203.25	2223.23	1517.71	2247.75	1320.54	1750.14	1410.53	2309.08	1698.23	1604.8	1857.41	2032.23
Tm7sf3	812.778	-0.983992	0.280213	-3.51159	0.000445439	0.0066208	459.297	750.202	926.997	912.976	1050.36	1075.59	794.079	449.786	945.341	655.891	662.71	686.095	1189.02	754.177	1135.87	556.065
Dnah10	9.63919	5.4934	1.56462	3.51101	0.000446405	0.00662568	12.6841	0	45.8548	0	0	1.35168	20.7797	2.11083	24.2067	3.11472	11.6248	7.07505	0	6.14718	17.8944	1.38304
Gnb1	16370.9	0.729568	0.207821	3.51056	0.00044716	0.00662568	23164.5	16828.9	18651.6	12758.3	14048	19848.6	15337.4	18239.1	14146.7	10262.5	17402.2	19343.5	9827.49	14994.9	17134	19946.6
Tmx4	400.096	-0.693486	0.19754	-3.51061	0.000447077	0.00662568	267.111	320.387	369.756	536.184	429.951	264.35	369.482	316.694	441.192	638.326	522.757	280.151	434.598	471.678	374.445	364.476
Rasgrp1	6.45457	-5.24162	1.49418	-3.50804	0.000451427	0.00668196	0	6.5779	3.72802	25.7376	16.2463	12.5677	4.50477	0.707676	4.08165	8.3539	8.76894	0	1.97133	3.43483	0.727181	5.86547
Map4	10746.6	0.966376	0.275588	3.5066	0.000453871	0.00669272	12884.5	13530.8	10829	4542.14	9588.76	9850.39	11173	14628	9951.92	8973.52	15528.3	12027.3	6105.96	10826.9	9021.09	12484.3
Pcsk6	1976.7	1.55473	0.443407	3.50632	0.000454351	0.00669272	5824.03	1847.16	1994.72	756.093	673.075	2333.99	1324.89	1820.66	1497.28	1629.9	1995.44	2750.76	2107.54	1470.29	1691.23	1910.2
Prr12	1156.12	-0.736891	0.210154	-3.50644	0.00045415	0.00669272	574.105	1008.12	937.458	1172.26	1464.99	1143.84	1310.46	959.666	1381.55	1573.92	1314.22	854.326	1352.09	1370.46	1055.37	1025.06
Slc17a2	11.4844	-7.70325	2.19702	-3.50623	0.000454499	0.00669272	0	2.79882	3.08428	108.835	21.5179	10.589	10.2338	0	20.5619	0	0	0	2.55908	0.738119	2.83198	0
Tff2	537.367	-3.63196	1.0358	-3.50644	0.000454138	0.00669272	28.3898	169.908	238.66	420.925	1371.58	2781.49	360.195	21.3259	1221.15	257.788	25.8381	125.804	384.161	199.566	497.003	494.085
Eif1	12619.3	0.532313	0.151921	3.50388	0.000458537	0.00674522	15194	13083.1	12346.5	12160.8	10466.3	17906.4	11452.1	16314.7	11128.5	9295.87	11011.1	15515.6	9889.27	10290.2	12456.1	13398.1
Ska3	312.934	1.18815	0.339189	3.50292	0.000460184	0.00676247	290.207	445.159	481.14	172.236	79.5384	336.488	267.884	427.371	418.204	310.151	293.615	308.793	198.813	341.166	291.891	344.294
Ctsz	4844.04	0.734879	0.209835	3.50218	0.000461461	0.0067673	6674.76	4795.93	5293.49	3197.8	3788.25	3524.39	4843.63	6279.2	6355.71	4562.65	4672	5009.3	3806.76	3906.02	5450.38	5344.39
Sh3bgrl2	5070.87	1.204	0.343763	3.50243	0.000461042	0.0067673	7237.54	6520.07	5098.81	1217.32	2733.61	5397.98	4614.13	4150.94	4630.88	8219.94	6360.18	5998.16	3593.25	5532.2	5081.27	4747.59
Hspb8	25.8756	-5.47435	1.5637	-3.50089	0.000463711	0.00678636	8.05519	5.78506	5.80426	321.073	10.4431	6.64241	25.4216	0	7.69219	3.49857	0	0.993371	2.06396	10.7887	3.80675	1.94186
Pcdhb17	83.5816	-1.79799	0.513581	-3.5009	0.000463693	0.00678636	33.1214	14.7254	56.3239	131.814	192.372	36.0523	102.267	74.2142	77.7367	62.433	48.1529	37.7413	185.348	73.6985	142.001	69.306
Lipe	481.086	0.831916	0.237676	3.50022	0.000464877	0.00679644	537.655	299.729	467.482	295.393	433.036	480.605	608.285	651.354	449.694	382.52	555.61	698.947	333.607	531.293	486.306	485.865
Cmc2	197.765	0.951729	0.272039	3.4985	0.00046788	0.00683028	213.915	355.065	228.32	139.715	118.825	206.966	141.734	280.621	158.313	118.004	157.611	269.746	137.086	153.809	225.443	259.073
Ppard	3066.25	1.15519	0.330209	3.49835	0.000468149	0.00683028	6696.18	4121.17	3118.56	1385.52	2415.18	3688.31	2966.65	2315.6	2309.18	3369.06	2825.62	3339.14	1742.83	2602.84	2683.22	3480.91
Kif3c	718.678	-1.05695	0.302201	-3.49752	0.000469608	0.00684458	304.402	658.11	547.01	1296.17	1022.9	670.791	728.536	499.026	714.39	674.679	852.658	595.855	598.024	678.191	778.376	879.739
Tm9sf3	937.107	-1.04926	0.300169	-3.49557	0.000473051	0.00688772	515.748	667.172	602.379	1558.92	1305.91	722.138	941.214	796.736	1530.13	1331.23	859.705	638.171	1177.04	1112.93	819.573	414.718
Tgm7	20.163	-3.49681	1.00067	-3.49447	0.000475007	0.00690915	11.0405	14.7254	13.365	58.8767	39.7692	9.83244	2.71504	0	49.2004	4.02794	35.2338	2.28735	38.8121	14.0772	9.64204	19.0033
2510009E07Rik	14.4375	-4.7693	1.36495	-3.49412	0.000475632	0.00691119	0	32.8489	2.86393	65.028	18.4973	4.36998	15.3852	0.853037	32.4723	13.0908	22.3147	2.28735	6.33667	1.65615	9.64204	3.35352
Hilpda	1144.83	1.9231	0.550438	3.49376	0.000476264	0.00691334	586.176	837.455	955.293	399.945	577.171	3899.62	732.958	2131.93	353.631	645.43	699.087	2979.9	525.792	568.608	813.56	1610.7
Brwd1	575.282	-0.799924	0.228995	-3.49319	0.000477287	0.00692115	401.312	508.521	550.596	686.048	714.057	418.681	683.98	481.823	665.08	922.893	482.452	330.982	715.077	567.662	634.952	440.397
Zfp398	267.237	-0.873915	0.250252	-3.49214	0.000479163	0.00694129	162.679	183.609	187.282	418.189	329.879	248.084	319.632	190.652	335.228	288.438	236.751	242.692	344.095	295.001	295.227	198.354
Rpl4	33556.6	0.521572	0.149412	3.49083	0.000481528	0.00696848	35626.1	40851.5	32909.4	25627.2	28607.9	53326.8	30117	41776.6	26134.3	29815.8	22779.8	39431.7	27155.8	27868	33929.5	40947.5
2610002M06Rik	787.338	0.54886	0.157386	3.48735	0.000487827	0.00704955	926.393	792.802	842.758	645.958	504.196	818.442	706.638	855.07	761.396	896.051	743.532	957.068	718.754	707.724	847.81	872.813
Gnb2l1	28814.5	0.56479	0.161973	3.48694	0.000488573	0.00704955	26806.7	37611.1	27011.4	21383.6	24512.9	48711.9	26039.5	39302	20534.2	21829.3	18299.9	34994.5	22459.7	24413.1	28560.4	38561.4
Mospd1	448.163	-0.669266	0.191936	-3.48692	0.000488612	0.00704955	412.77	346.792	433.184	668.386	502.953	373.789	453.326	321.075	494.444	548.158	428.305	380.791	595.851	494.258	473.623	242.904
Vnn1	7240.62	-1.29594	0.371782	-3.48575	0.000490764	0.00707344	5247.38	7874.67	5367	6318.26	13582.6	8361.95	7989.46	3942.74	4650.42	4204.16	5455.37	5580	16362.9	8526.66	8943.43	3442.94
Birc5	827.882	1.69578	0.486792	3.48358	0.000494758	0.00710947	987.83	1455.39	1373.66	321.624	130.878	1058.93	400.107	1374.01	530.722	464.438	649.593	1230.97	656.265	686.992	796.836	1127.87
Fblim1	3569.81	-1.64201	0.471334	-3.48375	0.000494439	0.00710947	1061.48	4461.85	1247.32	6054.87	10353.9	4167.48	2372.18	2977.92	2026.3	2085.15	3721.23	2372.89	3610.25	4121.55	2405.95	4076.67
Qtrtd1	398.91	-1.20815	0.346785	-3.48387	0.000494221	0.00710947	136.531	473.618	346.272	682.831	538.35	603.612	410.078	283.397	329.894	480.725	449.961	267.918	374.329	381.279	362.167	261.601
Pglyrp1	13810.2	1.41868	0.407361	3.48263	0.000496521	0.00712762	28400.8	15141.1	15527.3	3547.54	6602.61	19668.2	13586.1	12206.1	15015	12209.7	22829.2	13268.9	10000.9	9352.25	10734.2	12873
Nhsl1	770.291	-1.37177	0.394106	-3.48071	0.000500082	0.00717153	263.293	1397.26	810.225	1360.68	1020.52	825.608	699.965	494.981	549.624	337.139	564.839	498.193	874.598	1302.9	839.31	485.522
Zfp606	162.826	-1.54227	0.443241	-3.47953	0.000502297	0.00719605	24.7372	93.4657	129.086	328.655	247.317	112.974	221.207	132.268	261.621	171.901	182.534	107.126	203.551	160.447	131.92	96.4148
Gba	1799.06	1.32142	0.380031	3.47714	0.000506798	0.00723185	4338.66	1412.57	2262.41	665.5	1012.45	1449.45	1505.82	1911.67	1673.73	1466.94	2550.08	1834.52	1555.38	1481.58	1820.97	1843.16
Kifc5b	112.805	1.21023	0.348054	3.47712	0.000506823	0.00723185	99.3643	154.05	142.242	56.2405	52.7173	199.926	67.876	185.962	95.4488	133.929	82.2122	131.523	72.0797	106.821	98.1735	126.316
Mat2b	1964.29	-0.517913	0.148924	-3.47769	0.000505755	0.00723185	1741.15	1964.02	1763.77	2490.52	2560.63	1917.49	2126.36	1693.41	2025.12	1584.09	2290.28	1580.86	2130.21	1965.99	1851.26	1743.46
Racgap1	1784.29	1.38433	0.398075	3.47756	0.000506001	0.00723185	1382.86	2933.18	2376.47	703.427	394.521	2247.38	1221.8	2223.6	1340.74	2300.98	1609.4	2638.87	1293.98	1619.81	1990.95	2270.64
Chmp4b	9328.46	0.607978	0.174896	3.47622	0.000508542	0.00724914	13755.7	7741.33	10230.7	6250.46	7547	7945.02	9143.82	11316.3	10819.5	10226.7	9768.87	9169.21	8665.65	8248.44	9015.22	9411.34
2510003E04Rik	735.282	-0.649167	0.186772	-3.47572	0.000509479	0.00725525	591.537	562.11	628.896	1060.88	933.66	624.316	872.632	632.9	969.752	694.76	622.901	626.22	909.502	654.222	737.531	642.684
Rps25	1212.75	0.540639	0.155559	3.47545	0.000509992	0.0072553	1348.52	1501.99	936.504	1171.38	897.119	1717.4	966.554	1641.24	849.199	1126.82	889.066	1596.57	1086.74	882.725	1023.81	1768.42
Epc2	775.298	-0.785349	0.226053	-3.47418	0.000512416	0.00727529	729.005	582.456	645.323	1097.31	913.555	498.651	875.862	603.305	997.906	919.857	1027.07	431.405	1018.62	930.023	577.34	557.072
Pbk	447.431	1.31163	0.377521	3.47434	0.000512118	0.00727529	454.125	652.286	625.093	187.539	116.796	787.55	364.945	573.1	417.531	472.568	338.161	604.837	352.099	404.899	415.384	391.99
Mpv17l2	459.759	0.644707	0.185592	3.47379	0.000513159	0.0072786	779.143	496.131	454.41	342.715	393.993	439.183	406.351	531.442	447.724	455.157	469.784	459.758	391.29	392.506	450.546	446.018
Tnnt2	847.89	2.32793	0.670201	3.47348	0.000513765	0.00727995	191.619	1371.39	1146.28	292.029	261.023	723.803	623.915	2462.66	171.885	465.823	647.619	1507.64	276.212	719.978	454.077	2250.3
Gm15931	5.76	-5.12032	1.47425	-3.47316	0.000514369	0.00728128	1.57721	4.53088	1.90928	7.90881	19.4222	5.46247	3.62005	0	2.95203	0	7.04676	0	15.8417	4.96844	3.5062	13.4141
Ly6c1	7161.26	3.82141	1.10044	3.47263	0.000515383	0.0072884	10900.6	1899.56	15892.6	260.127	117.698	822.96	5567.11	13807.2	2363.24	4195.38	17707.8	11986.7	2217.66	4914.3	9118.16	12809.1
Wtip	845.482	-0.884886	0.254852	-3.47216	0.00051629	0.007294	578.904	934.924	661.92	1295.67	1183.71	550.207	806.548	815.767	957.928	1153.71	614.448	577.461	1167.89	711.066	732.736	784.815
Fam64a	559.097	1.60977	0.463727	3.47138	0.000517793	0.00730078	367.418	1017.02	881.716	214.409	97.0167	840.214	295.071	964.589	418.083	525.815	444.356	676.918	347.631	567.756	474.515	813.023
Zscan2	710.813	-0.9137	0.263196	-3.47156	0.000517439	0.00730078	347.534	503.943	549.952	885.626	1057.4	551.458	916.924	561.262	875.41	763.925	641.805	511.668	740.105	960.515	790.652	714.83
Rps4l	234.315	-10.7225	3.09383	-3.46576	0.000528735	0.0074477	0	1575.61	3.81857	811.093	265.436	471.957	0.905014	0	0	1.00698	0	0	0	308.043	311.175	0
Cwf19l2	194.303	-1.06195	0.306436	-3.46549	0.000529266	0.00744783	135.64	163.112	150.833	309.323	176.649	194.464	235.304	105.777	230.258	242.683	232.543	138.385	304.16	220.267	174.433	95.0163
Auts2	1250.76	-1.32852	0.383672	-3.46265	0.000534879	0.00751779	1113.07	922.895	976.242	1902.49	1842.8	1393.83	1056.54	381.105	1777.19	1393.42	1166.1	696.191	1745.46	1725.06	1337.82	581.93
En1	182.24	6.61705	1.91109	3.46245	0.000535291	0.00751779	1056.73	48.7069	222.432	14.0601	0.924865	709.029	47.0607	321.595	0	4.02794	0	403.718	3.16834	0	83.2722	1.11784
Ehd3	9.97889	-6.45306	1.86431	-3.46137	0.000537426	0.00754034	0	47.5742	4.77321	5.27254	37.9195	36.0523	0	0	8.85608	2.01397	0	0	12.6733	1.65615	1.7531	1.11784
Sult1a1	1411.48	-2.63353	0.761247	-3.4595	0.000541186	0.00758565	345.802	426.9	611.016	5550.55	3642.23	235.765	1078.53	573.267	2132.07	120.084	573.951	980.34	2596.41	1331.59	1002.13	1383.07
Dnttip2	1617.51	-0.49744	0.143835	-3.45841	0.000543373	0.00760882	1296.47	1615.26	1780.41	2088.81	1851.58	1253.09	1754.82	1352.92	1763.34	1363.46	1779.31	1381.56	1752.09	1865.65	1721.54	1259.8
Kcnh7	46.4918	-1.63454	0.472902	-3.4564	0.000547438	0.00765823	21.5949	16.6168	61.6195	98.8062	103.775	17.0951	44.2547	32.5362	58.9351	57.1195	48.2416	24.6071	44.9297	52.64	23.9281	37.1699
Cox5a	4021.71	0.638024	0.184647	3.45536	0.000549556	0.00767697	6867.18	4215.98	4062	3230.31	3197.26	4214.84	3490.64	4446.88	3075.03	4056.13	3683.11	4382.57	3653.88	3727.15	4189.03	3855.42
Csdc2	11.6474	3.72515	1.07812	3.45522	0.000549854	0.00767697	1.29025	19.7993	4.5896	4.31325	1.51319	8.80036	3.70178	52.3319	12.7941	1.64755	10.5686	49.9875	1.94392	4.91904	3.58535	4.57229
Lrch1	650.518	-0.904945	0.261945	-3.45471	0.000550888	0.00768389	419.538	690.959	577.558	971.027	888.796	483.975	783.742	564.71	724.23	977.782	567.264	424.304	781.787	630.991	493.497	428.132
Cldn23	1397.54	1.12776	0.326535	3.45373	0.000552899	0.00769689	2148.16	1292.43	2023.84	889.302	740.817	1279.31	1425.4	1550.82	940.712	1275.85	2590.86	1621.73	803.966	1250.39	1183.34	1343.64
Ttc14	190.845	-0.982635	0.2845	-3.45391	0.000552528	0.00769689	122.787	113.677	136.716	334.462	228.667	90.6166	193.477	147.995	228.88	190.892	276	176.659	322.513	246.901	134.943	108.332
Lrch3	1164.81	-0.599138	0.17351	-3.45305	0.000554281	0.00770861	1030.72	993.385	1127.83	1452.36	1346.24	911.143	1230.18	697.426	1343.74	1113.97	1467.38	1055.4	1408.44	1304.49	1097.06	1057.12
Ormdl1	622.535	-0.475197	0.137661	-3.45193	0.000556586	0.00773313	569.678	532.835	628.694	799.989	659.995	490.951	560.306	518.238	655.647	648.047	767.581	511.179	758.805	723.801	653.738	481.083
Rpl7a	21080.7	0.584111	0.169245	3.45129	0.000557922	0.00774415	21374.5	25525.1	21008.1	16212.1	16848.6	31232.2	19319	28344.5	16229.4	19155.6	13276.1	25972.4	17433.2	17649.9	22496.1	25214.1
Ccnd2	5239.32	2.3903	0.692655	3.45093	0.000558665	0.00774692	22860.1	6501.81	2912.61	4627.54	463.358	10161.3	4056.27	3969.18	3681.18	3443.89	2024.77	5563.99	1087.53	3975.58	3752.51	4747.46
Zbtb4	1627.62	-0.673155	0.195133	-3.44972	0.000561161	0.00777398	917.158	1499.19	1271.58	1941.08	2216.51	1962.85	1515.83	1317.54	1915.36	1641.93	1703.41	1527.53	1850.54	1683.83	1434.71	1642.91
Hist1h1c	2469.29	1.31282	0.380951	3.44616	0.000568622	0.00784687	5838.84	1932.42	2386.6	1124.81	1212.5	2440.63	3159.4	2054.11	3428.29	2318.08	3491.67	2184.42	1717.24	2742.58	2130.01	1347
Lsm4	666.536	0.652889	0.189453	3.44617	0.000568595	0.00784687	735.54	801.239	737.429	421.294	529.596	814.47	548.507	844.367	506.33	578.345	588.039	900.748	627.506	505.771	685.385	840.002
Thpo	11.2175	3.59446	1.04289	3.44663	0.000567621	0.00784687	38.7377	6.95515	11.7234	3.59718	0.94648	7.82618	14.8186	3.49189	10.0701	26.7935	18.0286	12.8745	0	11.864	7.17628	4.57585
Ube2s	2876.17	0.831777	0.241352	3.44633	0.000568259	0.00784687	2807.44	3716.45	3255.33	1940.3	1691.58	4424.6	2072.48	4506.59	2040.83	3047.13	2209.16	3416.16	2398.43	2509.89	2494.66	3487.66
Dhrs1	2526.71	0.934401	0.271181	3.44567	0.000569649	0.00785346	3170.33	3438.01	2740.67	1402.89	2306.44	2448.61	2822.13	3416.46	3024.97	1571.28	2520.35	3276.37	1452.52	2244.4	1939.59	2652.36
Tmem184c	618.6	-0.887177	0.257526	-3.44501	0.000571045	0.0078651	360.213	500.503	663.484	907.178	558.728	257.559	691.471	413.211	833.354	866.716	964.032	426.384	754.666	823.256	561.828	315.01
Krt18	70210.9	0.681584	0.197923	3.44369	0.000573839	0.00789596	121106	65500.6	66640.7	68071.2	61479.5	74681.8	65788.1	83822.8	62963.8	53303.7	61458.3	78197.7	46970.6	58067.8	72652.8	82668.6
Chpf2	864.939	-0.71157	0.206705	-3.44245	0.000576477	0.00792461	693.182	879.011	669.066	1041.77	1327.41	657.533	1031.7	735.451	1050.45	785.113	816.489	628.495	1001.03	871.382	961.406	689.547
Srp9	1547.49	0.467171	0.135764	3.44106	0.00057945	0.00795782	2207.4	1380.36	1469.66	1370.15	1262.55	1600.28	1535.46	1993.72	1464.59	1348.98	1421.1	1691.22	1624.86	1403.57	1579.77	1406.19
Slc3a2	2904.16	1.3916	0.404658	3.43895	0.000583979	0.00801231	4251.74	2147.15	2001.87	1061.27	1532.14	8337.49	1934.5	3558.62	1953.19	2573.62	1724.84	5093.08	2324.22	1951.76	2246.52	3774.63
Lrrcc1	217.061	-1.03667	0.301478	-3.43863	0.000584675	0.00801414	146.475	162.688	183.96	369.058	198.511	125.272	236.359	162.822	345.038	182.194	283.824	136.699	348.532	272.369	189.885	129.285
Angptl6	96.8617	2.44217	0.71075	3.43605	0.00059027	0.00805987	33.1214	65.6977	66.8249	24.6052	24.9714	432.628	68.781	134.78	50.1844	24.1676	21.1403	268.764	30.8913	43.0598	102.556	157.615
B4galt1	5720.51	0.608144	0.176957	3.43667	0.000588907	0.00805987	7385.44	5731.96	5183.1	3865.49	5037.6	4914.22	7029.69	7230.95	5860.17	4971.86	6563.82	5838.19	4515.63	6867.2	5917.92	4614.9
Mfap1a	1333.17	-0.503295	0.146469	-3.43618	0.000589973	0.00805987	1104.05	1051.16	1310.72	1775.97	1554.7	925.342	1438.97	1095.3	1799.75	1491.34	1304.83	1142.53	1406.74	1571.68	1331.48	1026.18
St3gal2	1934.54	-1.06649	0.310371	-3.43617	0.000589993	0.00805987	611.655	1660.65	1901.18	2606.64	2884.2	1581.16	2515.21	1508.16	1868.67	1879.23	2494	1358.49	1802.37	2193.87	1841.94	2245.24
Slc26a9	761.338	1.99033	0.579399	3.43516	0.000592213	0.00807866	325.976	1522.61	871.516	97.3627	180.026	958.741	659.11	1004.49	756.657	486.85	561.472	1723.47	491.368	592.98	1167.25	781.515
Fcrl1	21.3119	-3.64675	1.06254	-3.43212	0.000598881	0.00815613	0	24.4473	3.47717	18.5348	75.4579	61.299	25.5426	4.65339	20.1545	1.98263	2.13559	7.2887	62.4533	10.5561	8.77845	14.2284
Map2k3	2378.41	0.967739	0.281971	3.43205	0.000599035	0.00815613	5486.5	2219.86	2389.28	2443.43	1621.35	2236.46	2137.04	2702.07	2202.24	1684.14	2318.76	2868.97	1586.3	1859.26	1708.48	2590.44
Dync1li2	3141.71	-0.614069	0.179004	-3.43047	0.000602543	0.00818968	2987.24	2882.77	2654.86	4129.28	4167.44	2146.75	3372.08	2619.68	4168.26	3752.02	2958.46	2242.75	3714.08	3236.94	3025.85	2208.85
Nr1d2	661.437	-1.10474	0.322045	-3.4304	0.000602695	0.00818968	428.459	433.749	490.925	973.253	846.531	699.02	810.221	386.221	1088.07	738.684	862.272	437.261	871.455	732.072	537.039	247.762
Zfp189	92.4315	-1.27356	0.371282	-3.43016	0.00060322	0.00818968	27.4611	59.1659	95.8176	183.602	131.666	52.5891	105.667	68.1461	134.038	68.8007	95.0264	72.6229	98.1602	117.038	101.446	67.6578
Hmgcs1	10380.7	1.33532	0.389496	3.42832	0.000607328	0.00820668	25123.4	10333.8	12757.8	4924.56	3222.23	12833.5	10041.1	11549.3	6971.7	7483.91	7454.3	10677.4	10616.3	10853.5	10643.1	10606.1
Hmox1	1787.85	1.2917	0.376775	3.42831	0.000607345	0.00820668	2606.04	1317.36	1692.05	874.751	1219.54	4443.37	1187.13	2021.19	719.429	1228.75	1256.96	3444.41	1202.46	1238.79	1362.16	2791.17
Rps6-ps4	4025.58	0.99604	0.290534	3.42831	0.000607348	0.00820668	3943.03	5304.53	4251.98	2383.19	3537.61	8145.63	3341.31	5671.84	3440.09	2286.86	2095.24	5879.64	1849.52	3540.84	3756.89	4981.09
Shmt2	2101.06	1.15782	0.337701	3.42853	0.000606854	0.00820668	2014.1	2250.71	2320.73	1311.98	1322.56	4675.87	1415.44	2834.64	1155.23	1893.13	1010.04	3906.8	1290.31	1401.1	1876.69	2937.68
Tstd3	259.494	1.32898	0.38761	3.42865	0.000606595	0.00820668	600.918	333.02	325.533	159.055	127.631	154.042	272.409	255.058	249.938	159.104	337.07	253.896	153.664	274.092	279.619	216.861
Tmem17	108.912	-0.698685	0.203832	-3.42774	0.000608619	0.00821607	110.405	94.0157	105.011	135.329	147.978	77.5671	98.6465	83.5976	98.4009	108.754	105.701	86.9194	167.13	101.025	127.1	95.0163
Cox18	231.79	0.589139	0.171923	3.42677	0.000610809	0.00823784	276.539	205.828	267.794	198.849	185.741	224.987	234.086	332.769	168.261	191.817	166.234	265.786	198.502	240.132	258.381	292.931
Kiz	422.874	-0.899635	0.262592	-3.42597	0.000612599	0.00825418	196.851	376.924	492.699	571.785	608.31	451.218	399.289	386.627	583.052	365.274	387.178	280.824	437.188	391.245	416.972	420.548
Slc16a12	590.032	-2.98844	0.872599	-3.42475	0.000615357	0.00828352	28.3898	142.723	295.939	2563.33	1272.61	370.355	334.855	302.828	1673.8	812.636	292.441	162.402	90.2976	512.577	253.323	331.998
Cox17	825.773	0.593668	0.173365	3.42438	0.000616202	0.00828708	1026.8	861.312	883.288	741.355	663.944	959.473	740.663	1214.02	595.766	833.136	597.79	1003.87	746.262	662.698	680.27	1001.72
Pdgfc	869.072	-1.01944	0.297727	-3.42408	0.000616885	0.00828845	438.653	587.17	647.649	1295.83	1053.46	837.548	991.746	568.097	1677.79	1009.48	861.611	650.363	1012.67	965.473	842.709	464.91
Pycard	53.1971	-5.56014	1.62445	-3.42278	0.000619852	0.00832048	4.73163	177.837	2.86393	221.447	201.621	195.556	5.43008	0	1.96802	0	9.39568	4.57471	3.96042	2.48422	19.2841	0
Zzz3	1065.3	-0.800892	0.234153	-3.42038	0.000625339	0.00838624	941.896	965.841	1095.14	1652.81	1068.51	745.288	1073.79	533.089	1064.48	1204.36	1272.98	919.657	1440.13	1246.32	1074.83	745.605
Nadk2	198.005	-1.36096	0.398044	-3.41913	0.000628224	0.00841201	85.3596	111.792	180.582	354.552	269.866	331.249	119.094	165.009	189.99	244.116	193.076	116.239	322.035	169.78	193.014	122.319
Zbtb2	315.497	-0.81288	0.237751	-3.41903	0.000628439	0.00841201	339.42	231.117	253.893	415.92	401.82	243.985	351.018	185.917	352.117	428.308	458.997	192.719	433.382	288.317	275.843	195.174
Batf3	20.2857	3.26908	0.956413	3.41806	0.000630694	0.00843428	6.05755	32.5835	20.6986	0.843755	2.66408	17.4614	12.1032	63.4663	4.26945	29.7972	46.1065	23.0606	6.08427	14.1512	8.78131	36.4419
Morf4l2	8700.86	0.380453	0.11144	3.41398	0.000640215	0.00855358	10613	9178.25	8810.35	7219.75	8093.25	9983.47	8333.83	9159.23	7418.4	8144.84	8232.63	9052.88	6826.07	8353.8	8601.02	11193
Rpl35a	4855.21	0.531018	0.155722	3.41004	0.000649527	0.00866988	4836.92	6147.55	4096.34	4109.06	3999.33	7438.31	4017.65	6691.61	3419.61	4725	3773.5	6063.31	4070.95	3613.84	4061.04	6619.36
Sipa1l1	392.938	-1.04839	0.307492	-3.40949	0.000650856	0.0086795	177.429	356.621	303.984	648.466	566.493	231.073	421.222	330.174	436.981	448.215	419.625	244.374	346.742	500.749	470.02	384.843
Fbln1	44.5021	-3.58159	1.05117	-3.40724	0.000656232	0.00874302	6.07755	103.816	6.53162	33.9993	13.7104	67.0336	10.4692	1.74924	15.827	236.812	69.2217	6.52082	115.91	1.69805	6.99686	15.6607
Sqstm1	17832.1	1.2094	0.355003	3.40672	0.000657486	0.00875156	22647.7	11833.5	14452.2	10546.6	12204	46131.4	14096.8	22930	9921.95	11428.8	12207.4	34052.5	11685.6	12175	12879	26120.8
Aqp1	723.56	-4.22358	1.23996	-3.40621	0.000658709	0.00875966	47.3163	65.6977	740.802	5218.06	107.284	50.2547	526.718	117.719	2079.21	215.495	176.169	146.391	497.429	876.101	198.1	514.206
Cotl1	3312.53	-1.42952	0.419872	-3.40466	0.000662468	0.00880145	588.3	3497.84	2314.05	4647.75	4879.59	3772.38	2558.47	2350.97	3863.22	6056	2382.98	1962.55	3684.78	3333.82	2495.54	4612.2
Rassf1	1440.37	0.874688	0.257048	3.40282	0.000666931	0.00883606	2493.5	1165.38	1431.04	756.202	1149.03	1421.72	1430.37	1634.2	1378.09	1516.39	2034.64	1434.97	1126.03	1238.62	1149.83	1685.91
Reg4	39.3345	-4.17797	1.22776	-3.40291	0.000666713	0.00883606	1.57721	4.53088	11.4557	71.1793	20.347	5.46247	29.8654	2.55911	371.955	29.2025	8.22122	2.28735	26.9309	9.93687	7.01239	26.8281
Wfdc17	35.9715	-4.24379	1.24697	-3.40327	0.000665836	0.00883606	1.57721	0	26.73	27.2415	2.7746	0	40.7256	0.853037	22.6322	30.2095	240.764	4.57471	101.387	33.1229	42.9509	0
Ivl	628.527	-2.09949	0.617236	-3.40144	0.000670316	0.00887267	145.103	852.938	638.655	812.85	1341.98	618.352	462.462	302.828	177.122	353.451	1470.42	267.62	915.649	193.769	333.965	1169.26
Fam104a	1406.07	0.357297	0.105065	3.40074	0.000672042	0.00887905	1788.56	1453.28	1305.95	1274.2	1312.38	1601.6	1372.91	1643.8	1158.18	1116.75	1318.92	1521.09	1276.84	1270.26	1398.97	1683.46
Kif22	845.483	1.57027	0.461726	3.40088	0.000671693	0.00887905	1012.57	1375.12	1270.63	314.595	160.927	935.175	435.312	1400.69	547.109	983.824	749.306	1011.01	677.232	795.778	809.931	1048.53
Tor1a	975.506	0.365368	0.107452	3.4003	0.00067311	0.00888493	1146.39	900.67	1037.73	879.304	904.267	919.79	1126.05	1157.44	988.39	912.709	900.45	1068.55	835.527	921.562	928.858	980.416
Zfp282	1074.98	-0.563924	0.165873	-3.39972	0.000674543	0.00889562	856.76	1042.33	989.05	1368.97	1406.73	880.636	1260.11	838.324	1318.59	1212.32	949.249	918.714	1088.8	1027.66	1033.69	1007.8
Fam83c	68.3444	-1.25562	0.369428	-3.39883	0.00067675	0.00890825	47.3163	60.0341	68.7342	160.813	99.8855	62.2722	69.686	44.3579	88.5608	70.4889	45.8039	43.4597	61.7826	63.7616	59.6053	46.9492
Pbxip1	3623.78	-1.07194	0.315366	-3.39904	0.000676238	0.00890825	1938.72	2799.9	2840.18	4713.35	5732.53	1952.68	4574.35	2596.57	6224.55	2488.66	4459.56	2335.25	4001.26	4206.61	3845.24	3271
Rpl23a	11494.2	0.59827	0.176051	3.39828	0.000678106	0.0089177	10830.1	12624.7	11237	8477.44	9568.23	16693.8	10922.2	17138.2	9919.11	8530.68	9005.73	14548.1	10043	10193.3	11356.3	12818.5
Zfp709	90.2592	-2.04322	0.601294	-3.39803	0.000678718	0.0089177	35.2939	61.7019	63.8114	319.252	142.502	33.9423	40.4479	61.0217	108.33	60.3277	76.0135	54.7599	165.146	114.69	99.1633	7.74435
Mybl2	523.607	1.51136	0.444917	3.39695	0.000681425	0.00894503	737.524	971.267	850.865	250.872	118.53	560.089	321.062	564.139	321.412	468.923	357.449	871.158	391.139	497.408	314.228	781.645
Itpk1	2840.27	0.987249	0.290684	3.3963	0.000683044	0.00895805	4839.18	1714.37	3551.46	1675.93	1299.81	1998.04	3894.08	2268.89	3038.12	2991.8	2875.12	3227.68	2234.54	3108.76	3725.56	3000.99
Gapdh	85168.2	1.07084	0.315353	3.3957	0.000684526	0.00896924	121372	78116.1	82096.1	40150.1	55787.5	157975	70282.7	119575	53255.6	98101.8	48356.8	111927	72044	66817.6	85012.5	101821
Lmcd1	90.9494	-3.5913	1.05879	-3.39189	0.000694127	0.0090867	4.73163	141.59	12.4103	23.7264	170.175	45.8847	12.6702	4.26518	31.4883	748.189	103.352	8.00573	11.0892	31.4668	24.5434	81.6022
Cdh17	20546.1	1.5398	0.454114	3.39078	0.000696952	0.00910697	54958.3	17882	29803.7	11240.6	6694.24	16228.8	17318	13379.1	23489.1	11248.9	27525.1	21902.2	13100.1	23523.3	21915.2	18529
Ints12	1259.1	0.668526	0.19716	3.39078	0.000696951	0.00910697	1711.06	1312.83	1404.34	1040.86	863.106	1274.34	1224.98	1484.65	1179.31	834.489	1461.98	1301.92	923.895	1382.44	1233.58	1511.84
Trib1	1241.33	0.93836	0.276762	3.39049	0.000697669	0.00910799	2252.39	961.079	1043.32	848.96	969.132	1626.06	1366.43	1187.5	896.115	1056.25	1469.77	1805.7	917.169	974.208	1258.42	1228.8
Ybx1	21145.8	0.68347	0.201637	3.38961	0.000699927	0.00912912	22556.5	26668.8	24729.9	16390.1	17599.2	28563.7	20031.1	28157.8	19579.2	11585.4	17882.6	26312.8	13975	18965.9	22153	23182.1
Cacul1	3943.35	-0.701111	0.206866	-3.3892	0.000700969	0.00913436	3948.11	3453.03	3306.6	6791.67	4558.75	2744.1	3204.1	3228.15	4722.34	3766.34	3416.81	3104.87	5358.57	4554.52	3609.32	3326.39
A430105I19Rik	2610.99	-0.983472	0.290212	-3.3888	0.000701988	0.0091393	1660.38	2421.6	2488.99	4322.17	3999.11	1377.86	2375.6	2281.65	3011.15	2293.3	4207.18	1563.28	2568.04	2768.54	2156.25	2280.66
Prss27	175.077	3.09491	0.91344	3.3882	0.000703536	0.00915109	18.9265	79.2904	131.741	23.7264	23.1216	62.2722	67.876	683.282	55.1045	381.647	510.89	266.477	66.5351	86.9476	88.5315	254.867
Pfkfb1	89.0161	1.10116	0.325145	3.38666	0.000707485	0.00919408	81.6462	99.8532	117.595	49.4882	53.1725	91.0906	77.9112	175.912	80.114	54.0184	66.114	110.934	70.2939	79.9154	97.6873	118.512
2810025M15Rik	393.382	1.4543	0.429521	3.38588	0.000709512	0.00921204	479.123	688.507	530.74	92.6479	292.164	408.557	401.83	697.67	218.442	423.469	212.797	507.775	231.363	280.348	471.178	357.494
Tgfb2	253.45	-2.79759	0.826415	-3.38522	0.000711218	0.00922579	1.15281	113	171.545	880.389	585.768	86.4327	112.14	156.085	102.24	408.25	302.046	145.095	636.272	191.589	111.848	51.3485
Gprasp1	473.934	-0.467404	0.138095	-3.38466	0.000712658	0.00923543	398.296	432.732	491.459	527.439	551.39	444.433	469.96	376.134	498.108	485.01	604.923	364.671	493.912	562.881	504.841	376.761
Pcdh11x	10.2049	-4.012	1.18543	-3.38443	0.000713255	0.00923543	0.783367	4.86158	6.63968	35.9231	8.27046	0	10.7178	0.847572	19.0834	2.00107	12.0424	2.2727	16.0773	18.7348	15.0265	9.9961
Hist1h4i	53.3837	1.12165	0.331679	3.38174	0.000720289	0.00931805	67.8201	65.6977	69.6889	28.999	28.6708	46.9772	64.256	73.3611	59.0405	30.2095	44.6295	77.77	42.7725	45.544	63.9881	44.7135
Ehf	10306.5	-0.864355	0.255755	-3.37962	0.000725858	0.00938158	6196.4	9496.48	9366.83	12797.9	15354.6	9341.79	11564.8	6167.46	13731.6	12657.2	6887.6	9183.78	11075.5	11374	11627.9	8080.01
Cfap70	23.8648	-3.56728	1.05629	-3.37719	0.000732307	0.00945637	0	38.5272	8.11757	58.6037	48.0205	18.5795	18.7536	0.931654	41.8364	27.7843	27.574	25.4221	13.8377	21.124	16.1595	16.5652
Lrp5	5529.49	0.795971	0.235734	3.37656	0.000733982	0.00946943	7123.92	5560.82	4728.36	3014.66	4311.09	10137.1	5838.9	5808.65	5914.87	5671.23	4994.49	6171.84	3676.67	5007.26	5019.35	5492.57
Acss2	990.196	1.75221	0.519085	3.37558	0.000736589	0.00948997	1859.8	830.686	773.719	316.448	448.12	3458.32	540.444	988.706	692.983	894.265	417.061	1943.14	657.355	546.017	715.353	760.722
Ddx46	2094.12	-0.516748	0.153091	-3.37542	0.000737019	0.00948997	1936.81	1674.15	2451.51	2620.44	2297.35	1944.63	2132.26	1561.05	1982.77	2351.3	1636.01	1706.45	2521.19	2499.94	2231.68	1958.44
Map2k2	4090.2	0.46336	0.137283	3.37522	0.000737569	0.00948997	5818.97	3987.18	3977.65	3148.73	3936.56	4734.61	3858.57	4714.02	3275.26	3457.44	3617.77	4800.52	4031.37	3467.28	3798.43	4818.81
1810037I17Rik	1316.55	0.524613	0.155479	3.37417	0.000740378	0.00950896	1850.07	1516.71	1392.82	1168.75	1095.97	1662.78	1084.21	1671.1	939.728	1219.46	1200.3	1452.47	1190.5	1121.21	1119.35	1379.41
Jtb	844.351	-0.504506	0.149516	-3.37426	0.000740133	0.00950896	794.541	848.524	827.976	980.894	1122.61	804.816	945.363	776.272	931.051	819.143	784.408	601.731	977.183	761.474	824.999	708.64
Ankrd42	102.096	-1.25306	0.371704	-3.37112	0.000748637	0.00960638	69.4737	111.501	65.3438	233.72	156.748	81.8035	125.156	51.656	99.5651	109.27	107.419	81.7858	90.3635	83.1483	88.5008	78.0888
Zfp580	25.8102	-2.83639	0.841513	-3.37058	0.000750103	0.00961655	7.88606	2.26544	22.9114	83.4819	61.0411	17.4799	24.4354	5.11822	30.5043	74.5168	15.268	10.2931	20.5942	8.28073	8.76549	20.1211
Phc3	1081.43	-0.877395	0.260432	-3.36899	0.000754439	0.00966346	826.998	766.55	987.401	1535.17	1046.43	787.844	1195.9	544.174	1166.68	1199.47	1597.39	941.067	1660.44	1448.98	919.295	679.015
Spast	626.585	-0.779091	0.231371	-3.36728	0.000759149	0.00971507	477.895	596.943	512.643	855.031	763.939	326.656	618.124	522.058	852.151	891.181	681.187	402.574	788.916	751.062	588.164	396.833
Necap1	1120.95	0.800024	0.237697	3.36573	0.000763424	0.00976102	2135.54	1069.29	1174.21	818.123	772.263	1291.33	1062.49	1177.19	1035.18	1046.26	1214.39	1107.08	944.164	1041.72	1123.74	922.217
Nfat5	2566.97	-1.19118	0.353948	-3.36542	0.000764281	0.00976322	1665.82	2789.61	3269.12	4140.19	3007.44	1829.62	2875.31	825.256	2738.85	3168.14	2525.23	2002.7	3105.67	3833.46	1658.96	1636.12
Gm8898	101.286	-1.8279	0.543275	-3.36459	0.000766567	0.00978367	14.2542	54.7956	93.2502	221.543	77.3823	40.6536	114.175	69.6876	128.158	230.369	113.63	59.5814	229.167	91.6717	56.2659	25.9979
Snx3	3807.25	0.434976	0.129292	3.3643	0.000767374	0.00978522	5214.53	3775.96	3922.71	3207	3448.26	4542.96	3690.47	4343.95	3272.6	2993.17	3745.94	4219.6	3531.94	3410.51	3496.75	4099.72
Zcrb1	783.495	0.53603	0.159341	3.36404	0.000768096	0.00978568	1012.36	694.144	761.694	731.146	618.358	772.824	755.118	1022.95	614.525	850.817	939.448	964.776	719.152	677.366	744.811	656.429
Lama4	150.134	-3.42334	1.01784	-3.36333	0.000770091	0.00980235	2.35013	253.042	119.959	317.008	632.739	289.816	202.174	59.5508	43.2536	0	29.7501	33.3108	66.3548	117.835	110.146	124.859
Dyx1c1	18.4193	-2.50615	0.745208	-3.36302	0.000770957	0.00980462	5.67845	8.15629	18.2301	49.5038	36.5347	9.38814	14.1194	7.33041	19.7304	4.8074	33.6417	5.49012	20.9128	15.0224	18.4127	27.7505
Arhgef6	19.9858	3.98106	1.1841	3.36209	0.000773547	0.00982123	194.703	5.17858	9.06331	5.08113	2.38964	0	9.30872	2.58121	8.12554	14.491	12.3494	22.2893	6.20796	2.91981	23.5505	1.53286
Pepd	4381.78	1.99432	0.593184	3.36206	0.00077364	0.00982123	19853.3	4721.8	5307.05	1777.34	2314.38	2964.15	2017.36	1928.77	3677.2	2340.97	1676.6	6616.56	3034.66	4263.53	4356.87	3257.9
D830030K20Rik	5.69313	-6.73696	2.00416	-3.36148	0.00077525	0.00983292	0	3.39816	0	31.6353	15.7227	4.36998	0	0	0	0	7.04676	0	20.5942	0.828073	5.25929	2.23568
Ssr2	4953.87	0.633314	0.188467	3.36034	0.00077847	0.00986037	7173.4	5763.06	5215.33	3753.88	4174.06	7986.37	4374.32	5260.54	4575.39	3730.29	3761.59	5451.21	3599.92	3804.4	4801.91	5836.26
Ubl4	1056.03	0.802262	0.238753	3.36022	0.000778796	0.00986037	1988.91	1133.22	1153.19	909.861	727.948	1032.4	739.558	1188.52	813.559	866.336	1025.52	1296.61	924.373	780.225	964.9	1351.41
Fech	935.53	-0.697026	0.207497	-3.35921	0.000781656	0.00988758	581.991	1078.35	680.66	1195.11	1226.37	847.775	937.594	719.963	1234.93	915.349	876.147	807.435	1002.78	1031.78	901.092	931.159
Tubg1	1396.1	0.731461	0.217763	3.35897	0.000782331	0.00988758	1385.33	1941.82	1832.35	1002.55	911.709	1458.09	1089.22	1874.56	1006.55	969.76	1334.24	1746.26	1102.48	1381.66	1509.22	1791.8
Peli3	126.326	-1.96215	0.584217	-3.35859	0.000783411	0.00989247	24.0249	68.446	98.2687	128.182	292.413	113.485	137.899	59.1367	150.076	446.779	149.204	43.6209	79.8887	115.35	73.9061	40.5281
Arhgap24	12.2999	-3.86655	1.15166	-3.35736	0.000786893	0.00991888	0	4.7578	14.7478	13.5035	1.23077	6.04449	17.014	1.46335	19.6325	11.6316	13.1143	2.71186	51.9628	13.9127	10.9859	14.0859
BC005561	95.9635	-1.21066	0.360574	-3.35759	0.000786255	0.00991888	45.7391	58.9014	79.2353	178.388	99.8855	66.6421	109.507	35.8275	142.681	124.866	129.191	90.3504	118.813	121.727	78.8894	54.7741
Scd1	4149.38	2.47979	0.738689	3.35702	0.000787886	0.00992264	5515.51	4945.45	5246.71	215.296	337.576	10814.6	2011.85	5990.02	2213.04	4660.32	966.581	7075.93	2777.84	3241.9	4408.17	5969.26
Ddr1	9629.85	-0.699494	0.208398	-3.35653	0.000789272	0.00993132	7386.33	7597.67	8136.39	13843.1	14673.1	6483.39	11209.7	8226.63	10416.4	10339.8	10141.6	7473.17	8977.17	9743.27	9552.63	9877.2
Pola2	736.876	0.792671	0.236216	3.3557	0.000791632	0.00995225	754.716	1033.93	932.831	559.412	500.909	853.821	572.983	1232.74	580.83	628.847	706.247	792.648	546.988	670.807	587.072	835.24
Hyou1	6180.98	0.846086	0.252274	3.35384	0.000796981	0.0100107	8717.71	5967.4	5705.7	3834.87	4520.73	12535.5	5902.41	5850.53	5057.26	5773.04	3945.47	7487.66	3912.95	6015.01	5640.26	8029.19
Dnm2	7835.78	0.829803	0.247476	3.35307	0.000799212	0.0100299	15211.7	7053.31	7055.8	5335.7	6042.03	11047.3	7093.79	7302.04	6906.46	7375.32	7515.28	9458.57	6606.11	7096.78	6778.11	7494.22
Ccng2	2430.07	1.10878	0.330782	3.352	0.000802314	0.0100599	5342.32	1825.2	2102.24	1552.54	1794.79	3324.87	2142.55	2200.9	2077.5	1687.19	3153.09	3464.18	1754.86	2067.42	2487.03	1904.45
Sned1	314.663	-1.85181	0.552499	-3.35169	0.000803189	0.0100621	77.3338	304.175	119.75	597.145	552.852	183.902	467.827	214.294	688.266	436.662	343.129	112.227	316	198.278	99.926	322.835
Ptplad1	1861.16	-0.678325	0.202428	-3.35094	0.000805375	0.0100806	1247.57	2136.31	1789	2667.91	2542.45	1583.02	1892.38	1629.3	1771.22	2126.75	1348.28	1547.39	1875.66	1910.36	1925.78	1785.19
Ctcf	1921.16	-0.44779	0.13366	-3.35023	0.000807458	0.0100978	1645.85	2069.77	1898.64	2194.49	2132.03	1596.66	1945.55	1486.44	2073.68	2287.8	1963.93	1726.26	2295.94	2007.28	1936.24	1478.01
Gsta3	2724.87	-2.14445	0.64054	-3.34788	0.000814324	0.0101748	583.848	3975.23	997.499	2963.24	3340.97	5692.81	2483.05	978.777	2828.64	4487.91	556.833	1274.85	6243.85	1473.84	3872.71	1843.8
Acly	11796.4	0.426597	0.127449	3.3472	0.000816332	0.0101893	11983	14530	12911.2	9645.83	9127.27	15908.6	11316.2	13560.5	8219.11	11139.7	8631.21	12337.8	9413.59	11923.8	13230.6	14864.2
Pex11b	331.357	-0.829598	0.247863	-3.347	0.000816914	0.0101893	184.3	398.747	277.709	523.9	412.513	336.85	362.446	305.772	371.626	284.577	234.698	265.478	415.926	296.605	356.933	273.629
Tpi1	23501.2	1.15677	0.345738	3.34579	0.000820476	0.0102248	33076.4	20970.5	22250.9	9448.21	15249.7	42270.3	20681.9	32014.4	14847.6	27827	11196.5	32906.9	19255.4	18232.5	22620.3	33170.4
B4galt2	160.674	-2.37397	0.709847	-3.34434	0.000824778	0.0102692	3.50995	229.203	164.849	302.42	374.992	278.927	117.355	76.0871	77.8618	70.1736	179.063	90.5559	189.142	101.539	177.764	137.347
Csf3	1357.45	1.6923	0.506056	3.34411	0.000825477	0.0102692	479.472	2339.07	1440.55	199.478	582.665	2070.28	1707.76	2064.35	824.599	1137.89	1139.23	2521.81	785.748	1343.96	1184.22	1898.09
Eef1b2	11581.6	0.575059	0.171996	3.34344	0.000827472	0.010285	11762.5	14677	9705.88	9172.62	10307.2	18202.1	11077.5	17471	8371.07	9435.3	7473.13	13632	9298.5	9653.27	11237.1	13830.3
Inafm2	508.993	-0.742885	0.222273	-3.34222	0.000831097	0.0103211	455.814	431.566	484.003	770.67	766.713	501.455	478.752	412.017	477.244	662.596	355.861	381.988	552.875	529.966	445.287	437.075
Pcolce2	70.6455	2.98904	0.894623	3.34112	0.000834426	0.0103534	85.2117	209.819	81.0483	3.39117	7.13821	54.808	31.4324	174.472	11.392	38.8601	9.06462	105.924	36.6803	63.9115	182.663	34.5104
BC021614	57.2101	-4.27182	1.27882	-3.34045	0.000836425	0.0103617	0	48.5463	93.2464	260.13	29.9287	40.289	13.5304	0	203.999	18.0659	37.4588	19.3784	86.0525	39.6164	13.9785	11.1415
Tmem41b	1865.88	0.938717	0.281019	3.34041	0.000836548	0.0103617	3656.13	1934.07	2327.47	1110.2	1119.5	2279.04	1643.1	1635.72	1559.37	1803.89	1372.23	1978.09	1558.43	1869.94	2166.52	1840.43
Fbxo10	220.485	-1.55311	0.464998	-3.34003	0.000837679	0.0103667	36.2223	268.932	163.902	379.337	347.828	206.862	192.672	195.909	239.417	271.681	252.869	70.6883	173.293	240.097	231.33	256.723
Prrxl1	10.9572	-16.4608	4.92872	-3.33977	0.000838471	0.0103675	0	1.07619	0.906998	2.5047	0	0	0	0	0	0	2.86257	0	0	167.965	0	0
Rpl23a-ps3	4338.34	0.655502	0.196348	3.33846	0.000842433	0.0104075	4335.75	4884.29	4217.61	3275.13	3667.09	6247.97	4300.62	6437.01	3839.6	3053.18	2482.81	5762.99	3558.83	3848.05	4699.18	4803.35
Zfp362	415.205	-1.20581	0.36145	-3.33603	0.000849826	0.0104898	115.056	363.412	404.651	494.723	642.609	501.129	499.882	308.994	651.525	468.613	446.103	199.319	313.797	311.494	525.499	396.477
Abi2	205.392	-0.839888	0.251859	-3.33476	0.000853722	0.0105287	140.722	133.61	230.578	288.878	191.554	149.868	202.175	102.641	329.603	244.868	242.167	135.239	192.731	241.591	316.779	143.27
Cbx8	274.843	0.643774	0.19308	3.33424	0.000855334	0.0105304	279.131	206.73	285.103	189.851	204.6	247.726	315.329	330.243	282.989	278.458	318.275	360.534	227.794	238.144	329.65	302.93
Kifc1	733.475	1.34664	0.403859	3.33442	0.000854773	0.0105304	633.671	1164.87	1072.98	325.016	187.269	893.115	478.561	1194.63	592.044	927.761	559.86	903.635	561.632	714.098	577.068	949.407
Rpl38	5626.73	0.427359	0.128306	3.33079	0.000866009	0.0106527	5849.21	6885.11	4797.59	5161	5006.52	8115.11	5199.49	7668.03	4603.02	4389.63	3861.82	6806.3	4951.83	4568.38	5261.71	6903
Ptgds	15.4726	-3.15831	0.948368	-3.33026	0.000867645	0.0106636	1.62181	4.65901	6.33883	51.2701	43.7671	29.0167	2.17419	6.79701	23.6592	31.2844	8.45372	3.03761	11.361	6.98659	8.22774	8.90695
Slc26a1	45.485	-3.01757	0.906448	-3.32901	0.000871558	0.0107025	6.96146	26.7264	17.3884	126.191	292.025	38.8543	15.053	24.5191	5.52608	5.64048	52.6122	25.0297	43.6439	23.8614	18.7059	5.02212
Sec62	2719.51	-0.62884	0.189054	-3.32625	0.000880236	0.0107997	2265.45	1887.41	2606.91	3568.61	3216.56	2426.82	2690.56	2835.23	3311.62	2833.93	2667.74	1757.35	3817.26	3146.42	2613.25	1867.01
S100g	17.2163	-4.17983	1.25689	-3.32553	0.000882499	0.0108182	9.46327	6.79632	0	59.7555	23.1216	12.0174	6.33509	2.55911	9.84009	7.04889	5.8723	0	125.149	6.62458	0.876549	0
Glud1	6392.77	-0.766033	0.230378	-3.32512	0.00088381	0.010825	3788.06	5994.03	6305	8068.08	6867.53	7099.78	6557.75	4619.19	8034.67	7246.94	4324.55	5533.14	8773.64	6742.9	5220.01	7109
Ccdc85b	400.677	0.855367	0.257361	3.32361	0.000888595	0.0108518	616.69	271.853	350.354	318.989	376.42	512.38	372.866	748.113	321.771	239.662	196.135	518.085	346.141	345.306	435.645	440.428
Gm9573	778.092	4.02785	1.21194	3.32347	0.000889046	0.0108518	47.6039	65.9642	120.656	61.3343	52.3399	117.47	452.412	5340.25	328.553	1763.75	1167.57	1964.34	336.939	47.6432	208.343	374.311
Lrrk1	4733.71	0.844642	0.254093	3.32415	0.000886898	0.0108518	3789.35	6992.55	4375.59	2935.64	3557.61	4486.32	4208.45	7866.22	3687.77	5137.92	4752.62	5558.99	3094.28	4056.34	4588.64	6651
mt-Nd3	4575.74	-0.855799	0.257489	-3.32363	0.000888526	0.0108518	4860.97	3713.05	3262.97	8554.7	6422.27	2566.27	3862.6	3659.53	6756.2	4623.06	5125.34	2797.43	5501.03	4764.73	3805.1	2936.56
Atrip	382.359	0.616707	0.185579	3.32315	0.000890077	0.0108551	430.906	436.693	405.167	221.731	337.321	453.118	337.994	457.697	342.196	370.037	293.818	504.932	349.643	349.433	399.037	428.017
Tmem39a	489.317	0.856621	0.257801	3.32281	0.000891171	0.0108592	694.319	488.142	427.091	312.435	365.422	935.881	400.494	478.835	347.26	446.776	551.121	580.623	289.711	456.671	358.705	695.588
6820431F20Rik	3354.87	-1.06584	0.320812	-3.32232	0.00089273	0.0108596	2317.15	1947.29	2540.58	4155.59	2683.3	3476.08	1909.94	1861.66	4566.09	5483.95	4835.97	2370.97	6869.5	3240.7	2430.51	2988.64
Hemt1	39.3948	3.69873	1.11325	3.32245	0.000892311	0.0108596	264.523	13.1809	56.4527	4.24802	9.83601	10.0154	19.2498	18.1442	13.0331	1.94715	112.913	27.3753	9.71101	23.7285	25.4241	20.5343
Matk	18.6377	-1.91388	0.576203	-3.32154	0.00089521	0.0108713	8.06146	18.6753	10.0422	19.5016	57.4721	18.0151	9.65051	8.99398	17.8442	29.967	30.2707	10.2226	28.878	5.90878	13.2218	11.4774
Tlr5	425.525	-1.43726	0.432686	-3.32172	0.00089464	0.0108713	61.5565	337.823	391.423	619.098	502.238	387.353	440.669	223.35	548.252	567.054	372.147	376.393	673.192	388.102	453.75	465.997
Ms4a4b	6.43222	-5.80418	1.74772	-3.321	0.000896968	0.0108741	1.35663	0.9743	0	33.5997	57.0967	1.11191	0	0.289398	4.32839	0	0	0	3.48417	0	0.674353	0
Zfp846	209.423	-0.628863	0.189351	-3.32114	0.000896498	0.0108741	111.472	159.69	234.478	260.061	252.402	140.386	249.807	196.396	239.487	217.403	232.295	164.695	226.48	240.332	266.189	159.199
Vegfa	6425.53	1.69537	0.510566	3.32057	0.000898334	0.0108814	5043.59	4329.06	5908.16	2016.85	3566.99	19935.2	5993.58	6966.78	4145.77	5298.04	1668.55	13519.9	2299.43	5651.16	5655.95	10809.4
Tbxas1	20.3036	-2.88143	0.867831	-3.32026	0.000899322	0.0108842	7.17861	13.9824	16.8097	47.2714	95.6626	32.7031	1.71328	8.23666	16.1808	5.40041	10.6587	6.75393	20.4822	14.9977	17.9184	8.90806
Dbndd2	1270.82	0.730668	0.220121	3.31939	0.000902139	0.010909	1933.63	1397.4	1491.11	849.269	873.833	1077.7	917.229	1407.47	1645.89	1449.65	1373.21	1284.48	1061.57	1022.55	1242.41	1305.73
Gm12258	38.7325	-1.54722	0.466277	-3.31825	0.00090584	0.0109391	7.19372	25.8253	26.9889	56.8998	37.112	39.7891	23.1098	18.0522	105.89	44.9989	57.3667	25.0321	56.3442	35.7191	30.8534	28.5444
Ostc	2397.02	0.883334	0.266213	3.31815	0.000906163	0.0109391	4190.65	2503.31	2580.4	1429.74	1555.62	4038.95	2198.28	2395.33	2126.44	1927.37	1491.56	2853.47	2129.12	2078.46	2367.56	2486.07
Msrb3	295.632	-2.60065	0.78407	-3.31686	0.000910341	0.0109803	32.8547	106.474	179.939	1067.96	201.051	45.2746	222.491	104.722	320.284	706.704	476.626	107.168	212.24	258.323	146.402	541.596
Gm7251	19.6588	2.3316	0.703033	3.31649	0.000911561	0.0109857	47.3163	12.4599	10.5011	2.63627	13.873	34.9598	21.7203	34.1215	7.87207	21.1467	5.8723	25.1609	4.75251	15.7334	18.4075	38.0065
Atp5g1	2678.37	0.570479	0.172031	3.31615	0.000912682	0.0109899	3919.98	3046.66	3112.34	2170.91	1939.72	2503.49	2578.63	2884.81	2357.13	2390.78	2095.85	3298.88	2688.23	2344.16	2781.76	2740.61
Ccdc125	283.206	-0.786395	0.237289	-3.31409	0.000919435	0.0110407	174.244	296.199	221.142	305.085	385.191	230.081	328.871	237.399	363.972	224.086	317.919	203.376	375.441	318.786	311.604	237.904
Dpm2	1039.34	0.472017	0.142432	3.31399	0.00091976	0.0110407	1316.28	1116.39	1097.12	872.093	862.01	1023.93	936.314	1192.21	880.908	1108.82	1254.65	1121.06	880.445	900.237	999.877	1067.1
Slc35b1	1627.59	1.10518	0.333483	3.31405	0.000919534	0.0110407	4088.79	1656.89	1854.28	1156.85	1071.99	2566.81	1246.02	1484.83	1054.7	1035.37	1310.51	1791.55	1192.39	1389.07	1464.14	1677.24
Slc9a3r2	360.266	-1.38927	0.419223	-3.31391	0.000919997	0.0110407	113.1	648.681	267.17	349.207	631.787	305.75	456.987	261.673	437.094	508.477	310.113	111.627	299.775	282.056	314.282	466.481
Fam213a	17866.4	2.08198	0.6284	3.31314	0.000922549	0.0110621	7909.45	37437.8	27553	2090.78	4672.96	11804.2	17515.6	34485	7844.56	15721.7	38076.8	20205.1	8021.91	14374.9	14701.9	23446.2
Dio3	391.932	-4.84557	1.46312	-3.3118	0.000926962	0.0111056	0	486.634	73.582	145.459	1881.51	1483.98	105.207	42.6794	114.39	600.573	90.5252	33.2378	168.144	236.471	778.633	29.8926
Pif1	121.554	1.65238	0.499214	3.30996	0.000933101	0.0111698	202.107	130.755	214.853	34.4706	32.8709	155.744	79.5901	164.693	103.845	118.341	69.2677	217.166	116.848	95.9637	105.058	103.295
Sult1b1	174.993	4.13549	1.24955	3.30958	0.000934371	0.0111756	2076.2	13.2188	62.3878	47.1735	14.0311	40.7981	13.73	10.9504	17.2251	19.9776	216.554	62.7295	61.0079	86.9725	49.1008	7.82711
Gmnn	461.105	1.06479	0.321923	3.3076	0.000941003	0.0112187	376.509	841.531	597.875	228.377	202.319	610.42	394.459	611.129	314.959	380.617	509.21	660.503	357.222	352.324	420.15	520.083
Nuak1	310.086	-1.91594	0.579205	-3.30789	0.000940032	0.0112187	21.2683	430.957	282.128	385.965	459.666	108.385	220.541	179.118	290.972	608.142	566.749	126.888	396.737	236.088	275.579	372.186
Snx19	1369.02	-0.57058	0.172502	-3.30768	0.000940725	0.0112187	1187.64	1311.69	1386.14	1768.06	1844.18	1139.47	1275.16	1105.54	1134.56	1820.63	1289.56	1150.54	1501	1372.12	1266.61	1351.47
Tspan3	2567.18	-0.827879	0.250299	-3.30756	0.000941118	0.0112187	1186.06	2325.47	2053.43	3443.85	4012.99	2015.65	2626.35	2629.06	2802.46	3122.66	2878.6	1909.94	2716.85	2586.07	2363.18	2402.23
Fam3b	869.455	2.88508	0.872346	3.30727	0.000942095	0.011221	6307.83	1256.3	659.262	264.485	196.805	350.076	390.572	139.653	551.564	444.832	941.04	614.526	494.283	348.008	591.324	360.712
Arpc1a	4003.49	0.502086	0.151947	3.30434	0.000951987	0.0113269	5723.02	4606.27	3934.84	3303.68	3715.32	3790.88	3986.94	4847.84	3410.94	3235.2	3824.11	3939.76	3224.03	3801.07	4482.73	4229.17
Tecr	5847.03	0.571545	0.172977	3.30417	0.000952572	0.0113269	5625.81	6724.06	6804.49	4509.54	5017.27	7067.79	5982.57	7792.57	5247.83	5545.07	3948.23	6980.55	4203.74	5035.86	5944.68	7122.43
Hsd17b7	1667.39	1.45731	0.441181	3.30319	0.000955903	0.011357	3986.36	1559.78	2078.46	894.143	525.804	1531.45	1468.2	1015.4	1017.27	2278.44	2531.73	1834.37	1067.09	1644.55	1594.89	1650.24
Nmrk1	36.0241	-2.27224	0.687985	-3.30275	0.00095742	0.0113656	28.0565	8.26763	64.2444	55.1713	45.3375	6.19013	22.6695	2.30105	56.8333	61.6758	74.5815	3.56533	54.5409	55.3546	29.1597	8.43657
Zfp125	134.063	-1.15429	0.349572	-3.30202	0.000959926	0.0113859	83.5922	77.0249	86.8724	269.778	147.978	79.7521	164.712	84.4506	193.85	161.117	96.3057	96.0688	170.298	180.52	174.433	78.2487
Kif5c	32.1553	-2.51816	0.762808	-3.30117	0.000962828	0.0114108	11.8642	59.6442	69.3684	20.1899	62.3745	26.1643	10.3966	3.79202	44.2851	21.5882	26.9838	4.19695	29.4261	48.1607	55.1404	20.9098
Tada1	375.8	-0.940076	0.284791	-3.30094	0.000963631	0.0114108	299.332	303.9	251.73	574.613	576.278	404.271	429.373	309.072	524.752	414.398	252.616	277.958	550.036	274.372	321.675	248.424
Vgf	15.1331	2.48859	0.75411	3.30004	0.000966727	0.011438	25.1969	17.7418	20.3347	5.3157	1.59846	26.737	14.4582	31.8028	4.2517	6.90041	13.194	12.3154	5.4278	8.81931	4.66781	43.368
Gm9747	23.7685	7.164	2.17139	3.29927	0.000969357	0.0114596	4.73163	16.9908	28.6393	0	0	0	0	226.055	12.7921	57.3981	8.22122	3.43103	1.58417	18.2176	0	2.23568
Cdc25c	213.899	1.54076	0.467069	3.2988	0.000971007	0.0114696	225.541	348.878	322.669	72.0581	40.6941	254.551	120.367	319.036	191.882	198.376	133.888	309.936	180.595	192.113	207.742	304.052
C4b	179.484	-3.18715	0.966396	-3.29798	0.000973835	0.0114832	11.7965	34.7807	51.2527	148.133	512.905	33.8076	475.596	58.8829	581.764	104.145	11.4771	27.9406	248.819	213.123	299.09	58.2398
Hvcn1	69.4737	4.07715	1.23642	3.29754	0.000975373	0.0114832	372.49	0	45.4049	20.6002	0	20.3774	139.295	239.571	15.4938	21.6721	73.8448	42.3767	17.9548	47.5356	13.4065	41.5561
Itgb4	6505.16	1.01475	0.307723	3.29759	0.000975181	0.0114832	15658.2	5459.38	6352.56	4685.58	5430.02	7074.62	5924.3	5949.56	6122.2	4031.04	7292.54	8602.84	4833.46	5183.69	5500.64	5981.95
Tc2n	753.372	1.84833	0.560407	3.29819	0.000973086	0.0114832	2559.47	629.862	401.131	325.759	335.462	1364.99	790.65	390.286	724.886	861.404	872.451	917.339	411.477	649.347	467.604	351.832
Cyb5a	3620.58	-0.609301	0.184824	-3.29666	0.00097843	0.0115097	3838.98	3676.67	3403.75	5417.05	4109.04	2985.37	4072.1	2995.84	3793.69	3256.56	3051.27	2597.31	4855.6	3712.07	3057.95	3106.01
Pdp1	367.906	0.999056	0.303157	3.29551	0.000982435	0.0115432	665.356	359.085	378.867	263.189	291.365	303.646	321.519	461.834	208.604	339.977	561.213	438.889	227.944	390.083	348.419	326.506
Stc1	71.7049	-5.39183	1.63618	-3.29538	0.000982895	0.0115432	0	50.9724	5.72785	28.999	85.0876	769.116	45.2507	0	30.5043	11.0768	0	3.43103	30.8913	5.79651	69.2474	11.1784
Metrn	170.742	1.16362	0.353188	3.29463	0.00098553	0.0115646	123.761	191.01	119.668	118.734	87.3977	154.912	122.152	340.283	207.182	203.52	162.464	237.788	107.896	108.615	168.908	277.579
Pik3c2a	2676.63	-0.836613	0.253992	-3.29386	0.000988211	0.0115865	2105.58	1701.34	2659.63	4433.33	2483.26	1699.92	3184.74	1292.35	3447.97	3054.18	2897.39	2287.35	3230.91	3908.5	2762.88	1676.76
Ppap2a	495.041	1.26264	0.383576	3.29176	0.000995634	0.011664	886.195	650.671	493.811	249.793	425.353	428.766	482.679	768.104	360.637	229.693	769.499	609.033	268.182	467.344	339.135	491.764
Arhgef39	170.666	1.3297	0.404159	3.29004	0.00100173	0.0117257	152.659	230.872	228.897	133.155	66.7537	371.259	119.863	263.317	125.093	87.0087	162.052	260.326	70.1988	109.763	118.353	231.087
Gm7336	285.609	2.01526	0.612637	3.28949	0.0010037	0.0117391	649.811	36.247	303.576	86.1182	140.58	538.599	276.934	418.841	161.377	340.361	178.518	482.631	156.833	244.281	225.273	329.762
Cdk7	499.441	-0.523859	0.159305	-3.2884	0.00100757	0.0117748	375.376	504.06	434.362	685.431	537.347	498.177	517.668	478.554	467.404	472.276	535.554	383.132	562.38	563.917	464.571	510.852
Fcgbp	173091	3.38779	1.03092	3.28619	0.00101553	0.0118581	1.52929e+06	35392	146258	81854.9	10633.9	21925.9	62982.9	18009.5	95137	79769.4	313956	83291	63294.4	130623	38259.4	58781.1
Tcf23	26.4056	4.68309	1.42612	3.28379	0.00102419	0.0119495	288.63	9.06176	5.72785	3.51503	0.924865	41.5148	9.05014	0.853037	9.84009	0	15.268	10.2931	7.12876	4.96844	7.88894	7.82487
2700029M09Rik	339.818	0.84578	0.257646	3.28272	0.0010281	0.0119657	332.92	355.362	360.8	304.159	202.665	415.006	286.593	575.465	198.363	328.354	326.415	470.503	263.01	289.7	309.75	418.016
Sertad4	1034.94	-1.77754	0.541418	-3.28313	0.00102662	0.0119657	94.5149	680.586	671.979	1848.24	1532.12	298.488	1473.17	808.073	1539.04	1586.18	1269.82	479.382	1365.71	1247.1	947.863	716.699
Zfp455	27.232	-1.66688	0.507741	-3.28294	0.00102732	0.0119657	4.80346	17.2487	29.074	37.4681	44.7677	5.54539	41.3438	17.3197	37.4774	31.6904	52.4607	14.1565	38.2748	31.776	18.687	13.6177
Foxn3	794.262	-0.964222	0.293749	-3.28247	0.00102902	0.0119666	389.307	593.068	654.7	1081.02	787.703	451.774	792.132	587.463	760.794	968.627	1577.59	487.933	1000.12	1139.07	925.713	511.175
Fzr1	2422.74	0.455417	0.138846	3.28001	0.00103805	0.012052	2921.4	2111.86	2436.85	2118.65	2380.15	2518.13	2461.66	2900.98	2481.88	1977.02	2281.94	2903.34	1866.23	2180.6	2471.23	2751.87
Rspry1	296.046	-0.821776	0.250535	-3.28008	0.00103778	0.012052	225.553	239.603	255.417	346.648	337.821	203.929	316.925	167.989	347.852	428.598	284.705	240.156	431.902	239.285	367.951	302.399
Ddah1	3130.09	-1.96995	0.600682	-3.27952	0.00103983	0.0120629	478.955	1849.09	3304.41	5656.17	4203.78	3485.13	2990.59	819.5	8812.57	1657.13	1664.01	2114.98	3517.77	3073.62	2658.31	3795.51
Pbx1	5731.04	-1.01296	0.308963	-3.27859	0.00104329	0.0120931	2202.27	4719.77	4818.84	7103.93	7451.87	2624.05	8896.91	4202.04	8401.88	5912.28	8156.04	4039.8	6528.29	7278.68	5324.39	4035.57
Gm21994	38.7013	-1.28671	0.392513	-3.27813	0.00104497	0.0121012	23.6582	29.4507	42.0042	50.9679	50.8676	8.73995	37.1056	28.1502	43.2964	39.2724	54.0252	19.4425	72.8718	47.2001	46.4571	25.7103
Mst1	5.74019	5.28528	1.61238	3.27794	0.00104568	0.0121012	23.4732	2.48461	2.094	0	0	1.3496	0.544638	6.84963	5.47013	0	13.9532	19.4417	0.978493	2.0459	6.51761	6.64025
Slc7a5	1863.87	1.62814	0.496756	3.27754	0.00104714	0.0121083	1844.5	1947.43	1730.92	558.618	955.383	6092.56	1144.08	1955.08	793.509	1433.02	491.758	4312.58	1110.03	1076.72	1817.28	2558.47
Tceal1	36.555	-1.67016	0.509702	-3.27673	0.00105015	0.0121234	18.9265	57.7687	42.9589	37.7866	58.2665	27.3123	39.8206	11.0895	61.9925	16.1117	35.2338	17.1551	51.4855	41.4036	30.6792	36.8887
Tradd	1018.13	0.657379	0.200608	3.27693	0.00104943	0.0121234	1752.45	911.053	993.331	748.948	940.484	880.291	926.508	1093.7	904.521	1077.69	994.106	1165.63	850.324	895.87	932.234	1222.87
Fam21	2464.09	-0.444622	0.135713	-3.2762	0.00105214	0.0121367	2130.81	2291.49	2366.56	2729.42	3157.49	2017.84	2810.97	2073.73	2994.34	2253.63	2501.6	2183.28	2806.35	2766.59	2405.25	1936.1
Fam102b	1071.01	0.878518	0.268254	3.27495	0.0010568	0.0121805	1798.43	770.826	1044.07	955.736	608.775	862.937	1310.56	1201.6	1012.41	708.716	1464.07	1487.08	874.308	1008.79	1083.82	944.082
Abl1	3811.23	-0.511238	0.156224	-3.27246	0.00106614	0.0122783	2663.82	4516.26	3573.11	3667.41	4380.22	3112.64	4124.73	2889.27	3716.51	4515.96	4144.6	3062.13	4233.45	3933.63	4118.5	4327.37
Med22	1764.97	-0.583676	0.17851	-3.26972	0.00107655	0.0123881	1241.69	1802.23	1544.02	2213.92	2531.03	1356.22	1980.76	1645.9	1888.5	2068.21	1628.95	1523.75	1873.78	1736.34	1746.86	1457.38
Aldoa	41166.3	1.26808	0.388226	3.26634	0.00108947	0.0125066	54897.2	29614.3	32781.7	16113.1	26523.2	99034.7	38116	58602.4	26538.5	40315.5	17813.9	60893.6	29774	32518.1	40669.3	54455.2
Gmppb	1207.79	1.47119	0.450394	3.26645	0.00108906	0.0125066	3872.24	1020.51	1316.78	396.893	770.221	1370.26	961.915	1183.95	818.768	1098.83	1169.05	1188.56	1083.86	820.92	830.258	1421.63
Pcdhga7	28.9741	-6.48119	1.98398	-3.26676	0.00108786	0.0125066	2.57795	29.4862	23.2766	29.4447	183.948	46.4276	78.1611	0	38.4225	15.087	0	0	1.29466	0	12.5497	2.90988
Cdc34	1697.58	0.672873	0.206049	3.26559	0.00109235	0.0125094	2160.57	2186.48	1879.14	1207.1	1479.51	1891.88	1604.33	2385.53	991.759	1141.88	1692.16	1860.73	1332.98	1401.97	1629.79	2315.39
Pabpc1	27957	0.77464	0.237195	3.26584	0.00109141	0.0125094	24666.3	27822	25845.9	17919.3	19960	55486.4	25464	33988	21492.5	25885.7	25791.8	35232.1	17002.5	25573.1	30817.6	34365.4
Zfp65	207.054	-1.03308	0.316339	-3.26574	0.00109178	0.0125094	123.401	163.776	197.744	337.656	182.148	73.6949	176.681	124.562	272.001	327.582	301.551	169.19	332.826	220.036	221.359	88.6498
Gars	10386.1	0.759896	0.232724	3.26523	0.00109376	0.0125155	11778.6	11339.7	12275.7	8625	6659.96	12592.1	7259.11	13508.7	6178.59	8928.93	10533.7	14977.6	8493.52	9238.81	9699.02	14089.2
Sprr2a3	8214.9	2.443	0.748551	3.26364	0.0010999	0.0125758	40492.7	16079.2	7680.19	2410.32	4334.95	2643.2	3736.42	7119.37	3757.95	2827.28	12563.4	5684.14	3055.73	6024.23	8309.81	4719.4
G6pc3	807.439	-0.584697	0.179238	-3.26212	0.00110583	0.0126333	557.012	746.362	732.828	1006.16	1205.52	1030.56	744.418	751.037	719.669	753.921	620.852	815.583	980.641	693.669	766.159	794.619
Dync2h1	245.495	-1.33973	0.410863	-3.26078	0.00111107	0.0126831	115.183	194.058	102.645	520.901	438.805	171.352	263.479	186.428	275.999	193.877	248.752	178.533	258.197	391.57	220.395	167.747
Gm21761	21.8681	4.06001	1.24537	3.26008	0.00111379	0.012704	22.0862	22.6879	9.41222	3.52023	4.44592	4.37644	9.87732	60.4674	29.0186	4.0339	0	50.9843	0	69.3446	47.0969	12.5383
Slc2a6	72.0473	2.5703	0.788483	3.2598	0.0011149	0.0127065	328.432	55.7518	119.843	48.2425	13.1179	31.2266	51.1356	89.8919	32.0326	15.7624	120.059	58.0287	18.5978	56.0388	42.3136	72.2825
Ptprt	17.8601	-3.39253	1.04097	-3.25901	0.00111801	0.0127318	7.62205	3.12806	1.97733	40.0429	74.9865	39.4367	5.62355	1.0895	6.79375	5.13733	2.43258	5.52694	35.1572	9.39385	34.2928	13.1202
Prg4	27.1945	4.24021	1.30132	3.25839	0.00112045	0.0127473	327.78	0	23.27	3.43982	7.07952	0	20.8691	5.89169	5.55696	1.28468	7.15024	9.88389	7.75136	5.18766	5.59139	4.37568
Zmiz1	5317.22	-0.844012	0.259041	-3.25821	0.00112116	0.0127473	3586.75	3823.15	4033.44	6297.45	7803.77	5545.09	7153.94	3110.84	8345.43	6271.37	5242.86	4244.59	5539.51	5272.83	4618.56	4185.92
Calcb	62.8139	2.88136	0.884656	3.25704	0.0011258	0.0127797	20.2458	56.0337	140.917	7.25149	26.8485	8.01355	55.3748	145.217	45.2824	6.46304	31.2286	252.726	22.9521	102.971	69.1482	14.3491
Slc25a37	1460.4	1.31053	0.402347	3.2572	0.00112517	0.0127797	4111.73	994.218	1209.32	1109.48	836.682	2410.96	1192.03	1574.98	1228.77	739.316	1625.76	1906.61	1114.02	987.025	1065.78	1259.78
Gm28035	24.3314	-6.66587	2.04702	-3.25638	0.00112842	0.0127992	0	47.5742	0	13.1814	27.746	113.619	9.05014	0	0	24.1676	50.5018	0	23.7625	40.5756	0	39.1243
Hgsnat	1612.57	-0.893794	0.274527	-3.25576	0.00113088	0.012817	1616.64	1089.68	1798.55	2224.13	1741.52	1283.68	1267.02	1107.24	1243.79	1763.23	1729.98	1203.15	3325.17	1819.28	1205.25	1382.77
Ank1	36.956	3.2784	1.00733	3.25453	0.00113581	0.0128626	59.6298	12.0252	20.9724	0.672249	19.2908	47.3868	3.76661	87.1467	43.8711	35.0945	14.2864	82.5012	7.30855	17.5218	55.5631	84.259
Upk1b	52.8363	8.72926	2.68331	3.25316	0.00114127	0.0129142	727.095	0	0	0	0.924865	2.18499	0	0	1.96802	91.6356	17.6169	2.28735	0.792084	0	0.876549	0
Clca6	283.468	5.81377	1.78741	3.25262	0.00114347	0.0129288	2309.04	48.7069	137.468	12.3026	3.69946	0	16.2902	22.179	23.6162	10.0698	1695.92	131.523	27.7229	62.1054	23.6668	11.1784
Cd200r3	17.4651	-6.02835	1.85519	-3.24945	0.00115628	0.0130633	0	6.40997	6.15387	35.9757	51.9368	0	6.06597	1.87956	0.318083	30.6144	84.995	0	51.3928	3.70017	0	0
Sbk1	1492.3	-1.35604	0.417479	-3.24816	0.00116155	0.0131124	465.277	1107.8	1010.97	2282.13	2845.81	659.866	2104.16	1173.78	2121.52	1925.35	1032.35	863.476	1284.76	2132.29	1823.22	1044.06
Kbtbd11	488.961	2.31099	0.711916	3.24615	0.00116976	0.0131947	537.627	1011.69	520.432	53.4734	76.0892	783.993	189.889	101.668	153.421	1497.06	1326.14	408.59	81.8116	437.504	371.02	272.972
Slc4a3	293.531	-1.47973	0.455904	-3.24571	0.00117157	0.0132047	58.9875	242.619	185.004	430.955	547.129	260.789	195.397	210.897	279.143	506.846	546.855	161.438	229.376	370.383	265.361	205.321
BC016579	391.283	2.11864	0.652917	3.24489	0.00117496	0.0132325	1935.24	133.661	300.712	245.173	75.839	310.268	329.425	243.115	353.259	246.711	614.243	478.057	289.903	323.776	255.952	125.198
Vps11	2111.33	0.42171	0.129972	3.24462	0.00117608	0.0132346	2665.49	2089.87	2044.84	1554.52	2096.67	2089.94	2308.69	2397.89	1941.45	1781.36	1957.82	2201.58	1770.31	2258.15	2333.37	2289.33
Syt1	41.5514	-2.31375	0.713463	-3.24299	0.00118284	0.0133002	39.0363	14.5782	20.7922	173.995	77.828	32.2769	31.3589	3.37805	44.8121	23.5378	53.4853	20.3805	52.5393	42.6295	16.488	17.7067
Aldh1l2	201.567	2.45509	0.757373	3.24158	0.00118869	0.0133554	188.228	94.189	81.7645	20.1715	38.8782	1334.3	78.896	152.661	42.8136	54.1086	47.1056	534.153	101.715	61.9198	80.0744	314.095
Cyp21a1	60.8533	-3.43099	1.05909	-3.23957	0.00119709	0.0134392	0	83.4146	27.0388	52.7288	239.989	52.1046	89.716	25.5927	68.6023	154.015	8.87061	3.63638	33.6519	37.2656	57.9295	39.0965
Tyk2	47.7171	-8.8589	2.73667	-3.2371	0.00120749	0.0135453	0	0	93.5549	125.662	170.175	0	103.172	0	69.8646	3.02095	98.6546	0	0	99.3687	0	0
Poglut1	836.354	-0.539998	0.1669	-3.23547	0.00121445	0.0136127	638.342	829.678	864.295	867.605	1093.38	592.505	841.924	710.283	960.514	1197.17	899.432	628.389	916.806	826.42	882.307	632.616
Fbxw5	1675.54	-0.394108	0.121821	-3.23514	0.00121584	0.0136176	1344.89	1671.88	1588.91	1647.45	2109.72	1632.87	1651.02	1432.59	1664.07	2014.98	1664.22	1495.3	1862.74	1703.61	1763	1561.35
Crb3	2461.93	0.552249	0.170719	3.23483	0.00121715	0.0136215	3901.14	2248.73	2421.6	1883.64	2311.01	2650.79	2331.02	2803.59	2080.86	2328.07	2551.91	2653.55	2183.67	2079.62	2159.46	2802.22
Clic3	549.821	1.14494	0.354051	3.23383	0.00122144	0.0136589	1118.54	531.423	714.307	267.075	356.693	275.481	366.528	698.659	600.301	614.526	741.878	697.798	512.702	351.389	448.745	501.097
Rbl2	327.024	-0.921263	0.284966	-3.23289	0.00122545	0.013693	260.777	333.869	314.597	482.672	336.166	213.852	357.443	203.402	393.368	353.912	492.822	192.542	423.428	307.485	416.378	149.674
Cacna1a	46.2988	-3.60369	1.11497	-3.23211	0.0012288	0.0137064	6.13817	48.9107	107.198	20.8546	104.698	26.7546	14.3402	0	73.5812	52.5577	7.02774	18.3664	175.666	26.3179	19.4745	38.8957
Cpt1a	2795.56	-0.830554	0.256983	-3.23194	0.00122954	0.0137064	2725.42	2563.34	2167.99	3307.64	4755.66	2309.53	2955.77	1873.27	3863.22	3022.97	2553.28	2049.47	3754.48	2853.54	2540.24	1433.07
Rnf216	940.269	-0.484049	0.149759	-3.23219	0.00122847	0.0137064	772.834	804.231	807.627	1134.48	1201.4	739.618	981.94	956.254	1035.18	1144.94	887.892	734.24	1116.05	884.382	1031.7	811.551
Smtnl2	988.166	-1.7229	0.533311	-3.23057	0.00123542	0.0137613	102.175	802.411	1080.95	1901.72	912.137	1166.05	829.367	569.959	1040.62	1646.95	543.223	680.863	1653	844.583	844.088	1192.55
Fau	5154.77	0.612065	0.189586	3.22843	0.00124474	0.0138542	5816.47	5564.71	4523.92	4564.05	4282.15	6776.39	4654.64	8519.3	3763.52	5465.23	4170.97	5523.11	4150.22	4099.06	4280.93	6321.58
Abca1	8.78538	-5.43484	1.68383	-3.22766	0.00124806	0.0138748	3.06818	0	0.928542	14.9326	85.4601	4.2505	2.64081	0	8.61395	0	2.2847	0	13.4598	3.22173	1.70517	0
Ccdc158	8.56059	-6.01457	1.86364	-3.22733	0.0012495	0.0138748	0	11.318	3.85951	18.1216	20.7095	10.9169	0.914714	0	2.98367	2.03555	14.9084	0	2.40172	44.5244	0.885949	3.38946
Depdc1b	114.105	1.38862	0.430266	3.22734	0.00124946	0.0138748	83.0627	158.03	180.011	37.2491	63.488	178.646	65.0235	174.969	66.3686	70.7094	54.2562	220.846	82.6972	111.088	119.162	160.069
Ldhd	778.486	2.11515	0.655576	3.2264	0.0012536	0.0139095	3923.94	671.938	593.338	150.966	337.543	1127.84	389.971	380.905	498.823	694.903	425.814	787.789	686.068	522.209	519.371	744.346
4632428N05Rik	21.6562	2.79975	0.868426	3.22394	0.0012644	0.0140184	16.33	38.5976	20.331	4.5492	1.87346	36.2076	79.2476	13.2482	9.85395	4.8978	8.10668	48.7136	5.46735	18.1276	8.77786	32.1698
Ripk4	3484.92	0.469508	0.145742	3.22151	0.00127518	0.014127	3726.95	3711.92	3152.23	3328.73	3163.96	4224.67	3555.8	4521.95	2754.24	3312.98	2855.11	4118.38	2443.58	3182.28	3287.06	4418.82
Cldn8	760.219	-2.2996	0.71402	-3.22064	0.00127906	0.0141504	111.982	100.812	612.88	1225.87	422.663	300.436	695.05	215.818	1324.48	2826.6	463.912	440.315	2135.46	862.024	189.335	235.864
Tomm6	1904.22	0.488086	0.151552	3.22059	0.00127928	0.0141504	2151.32	2264.36	2051.03	1482.46	1618.17	2105.26	1669.73	2261.21	1437.19	2077.96	1624.57	2252.16	1651.7	1596.29	1939.07	2285.03
Rpn2	10552.5	0.896719	0.278472	3.22014	0.00128128	0.0141616	17628.4	11583.9	12765	5749.91	5993	12484.3	9600.82	8717.61	14202.5	11150.8	8311.82	11583.3	8626.27	9126.74	10602.9	10712.9
Dok6	10.7852	-4.59297	1.42663	-3.21946	0.00128434	0.014178	0	18.7909	2.30108	1.41211	64.7926	11.5851	13.9338	2.74156	7.90622	16.5025	5.66187	0	14.6376	4.65733	1.40856	6.23117
Nars	3198.48	0.907109	0.281767	3.21936	0.00128475	0.014178	5066	3040.22	3371.8	2333.98	2503.61	6498.15	2545.8	3947	2539.73	1960.6	1563.21	4809.16	2532.29	2057.76	2322.86	4083.46
Pdia5	667.618	1.45119	0.450839	3.21887	0.00128695	0.0141913	1405.3	1261.85	755.122	273.293	270.061	1029.13	449.792	424.812	406.396	797.532	237.241	696.499	379.408	527.482	740.684	1027.29
Isoc1	966.725	-0.558616	0.173624	-3.21739	0.00129361	0.0142537	706.591	992.262	1075.88	1268.93	1282.79	908.955	1068.82	882.04	876.752	876.076	755.178	838.315	1028.92	775.904	959.821	1170.38
Hbp1	3688.05	-0.629343	0.195654	-3.21661	0.00129714	0.0142816	3166.38	3639.71	3319.61	4418.19	4649.57	2899.4	4284.72	2507.37	4722.52	3458.2	3972.01	2450.42	3493.83	4115.39	4912.54	2998.88
Pi4k2a	1764.43	0.402396	0.125115	3.2162	0.00129902	0.0142912	1742.82	1940.35	1737.45	1483.34	1596.32	2006.91	1638.98	2230.69	1586.22	1889.1	1451.63	2073.49	1501.79	1772.9	1638.27	1940.57
RP23-455B5.4	6.95068	3.8627	1.20216	3.21313	0.00131295	0.0144333	11.0405	2.26544	8.59178	0	2.7746	2.18499	4.52507	13.6486	14.7601	7.04889	3.52338	13.7241	0	4.96844	21.0372	1.11784
Gm10036	40.9315	1.63123	0.507935	3.21149	0.00132048	0.0144937	45.7391	54.3705	45.8228	24.6052	12.9481	42.6073	26.2454	47.77	46.2484	12.0838	28.187	89.2068	21.3863	35.6071	43.8275	78.2487
Gnptab	1416.46	-0.921648	0.287012	-3.21118	0.00132191	0.0144937	762.296	1305.29	1352.41	1595.13	1535.46	1528.78	1700.42	577.767	1990.94	1613.53	975.145	1206.59	1690.05	1491.35	1823.89	1514.27
Slc11a2	2801.09	0.880889	0.274331	3.21105	0.0013225	0.0144937	4862.3	2835.56	2647	1609.2	2136.05	3926.4	3012.24	2440.32	2262.11	3320.82	2228.12	3587.14	2166.19	2569.14	2887.32	2327.49
Ublcp1	761.841	1.00009	0.3114	3.21158	0.00132006	0.0144937	1299.07	1035.15	840.235	612.748	409.598	581.868	741.852	866.687	406.777	703.249	943.385	990.129	553.734	729.867	828.046	647.069
Pacrg	25.2415	-2.66851	0.831105	-3.2108	0.00132366	0.0144953	0	21.6258	7.39179	54.5257	79.4586	46.93	14.015	14.5311	21.3337	8.57678	28.0284	7.96993	18.903	35.5714	18.3252	26.6771
Necap2	2749.1	0.71861	0.223829	3.21053	0.00132489	0.0144976	3653.49	2797.22	2543.87	1885	2740.57	3591.99	3120.07	3385.04	2645.68	1727.79	2521.19	3259.21	1632.52	2329.76	2771.57	3380.68
Rac3	562.331	1.05314	0.328066	3.21016	0.00132662	0.0145054	491.879	766.093	490.498	350.196	471.769	798.528	619.526	1087.82	552.952	564.395	457.564	818.745	336.15	358.64	412.781	419.754
Aif1	78.3482	-1.69881	0.52931	-3.20948	0.00132975	0.0145276	9.30626	41.9236	48.4768	173.976	118.465	26.6846	75.1103	73.838	55.2422	120.299	116.37	39.3454	127.908	93.2312	69.4564	63.9399
Gm8756	48.1573	1.20492	0.37547	3.20909	0.00133154	0.0145276	75.7062	35.1143	37.231	15.8176	38.8443	64.4571	54.3008	77.6263	34.4403	41.2864	32.8849	69.7643	41.9805	43.0598	54.346	53.6562
Hnrnph1	3823.43	-0.455919	0.142082	-3.20884	0.00133272	0.0145276	2706.75	3064.26	3790.73	5054.07	4083.66	2859.25	3611.36	3970.98	4683.7	4170.01	4584.37	3306.01	4566.97	3973.62	3819.12	2929.98
Itga7	51.3587	3.62307	1.12907	3.20889	0.0013325	0.0145276	282.321	16.9908	8.59178	11.4238	18.4973	76.4746	11.7652	48.6231	39.3603	27.1886	7.04676	233.31	15.8417	23.186	0	1.11784
Antxr2	1873.25	1.07952	0.336456	3.2085	0.00133429	0.0145336	1400.56	2112.52	1466.33	1287.38	1316.08	3542.96	1477.89	2870.47	949.568	1234.56	1766.39	3172.56	920.402	1844.12	2195.76	2414.53
Ptprk	1686.36	-0.86441	0.26944	-3.20818	0.00133578	0.0145387	952.636	1474.8	1628.62	3137.16	2421.3	1132.92	1451.64	1786.26	1846	1297	1900.28	1287.78	1780.61	1917.82	1546.23	1420.77
Ctso	435.892	-1.02212	0.318622	-3.20792	0.00133697	0.0145406	407.004	306.587	492.216	591.288	562.917	200.938	523.707	254.058	586.124	331.501	716.374	219.645	629.011	408.514	384.675	359.719
Hs2st1	1637.79	-0.606826	0.189325	-3.20522	0.00134961	0.0146668	1164.9	1979.57	1459.81	1929.03	2174.43	1784.26	2014.69	1053.66	1463.78	1225.65	1490.52	1451.45	1483.15	1817.57	1933.09	1779.14
Xpc	1179.79	-1.12598	0.351402	-3.20424	0.00135417	0.0147053	479.572	873.741	856.231	2371.48	1626.47	835.85	1464.14	1024.94	1696.31	1020.33	1111.79	808.839	1057.54	1401.1	1122.64	1125.67
Kremen2	44.0732	-2.52609	0.788481	-3.20374	0.00135655	0.0147198	36.2759	87.2194	19.0928	172.236	61.966	72.1046	27.1504	5.11822	22.6322	48.3352	49.3273	6.86206	34.8517	11.593	28.0496	22.3568
Oxct2b	17.3239	2.29931	0.717975	3.20249	0.00136243	0.0147724	29.967	9.06176	21.0021	8.78757	8.32379	16.3874	19.9103	34.1215	23.6162	2.01397	19.9658	30.8793	2.37625	24.8422	11.3951	14.5319
Card10	5689.1	-0.888053	0.277535	-3.19978	0.00137531	0.0149008	2802.24	4686.32	4874.56	8395.46	9886.71	5544.46	7047.95	5078.76	5751.73	4262.73	4922.23	4777.92	5154.27	6856.26	5483.57	5500.51
6330419J24Rik	351.061	2.03327	0.635555	3.19921	0.00137807	0.0149121	72.5517	606.005	683.524	52.7254	67.5152	205.389	249.784	273.825	232.226	307.13	762.225	387.706	59.4063	335.369	360.262	961.341
Yars	1598.79	1.00225	0.313289	3.19913	0.00137844	0.0149121	1687.85	1569.75	1520.34	1247.82	1138.58	3843.91	1208.59	1992.12	1142.48	809.436	905.024	2784.01	841.099	1107.13	1465.37	2317.17
2310034G01Rik	119.048	1.86076	0.58172	3.19872	0.00138041	0.0149221	208.192	144.988	151.788	31.6353	25.8962	46.9772	152.042	121.984	112.177	70.4889	332.372	122.373	66.5351	87.7757	124.47	105.077
Gpr20	12.6374	4.15774	1.30006	3.19812	0.00138328	0.0149311	67.8201	0	8.59178	0.878757	0.924865	29.4973	2.71504	11.9425	7.87207	9.06286	0	25.1609	3.96042	11.593	8.76549	13.4141
Pank2	1301.71	0.488344	0.152708	3.19789	0.00138435	0.0149311	1526.44	1288.5	1636.49	1176.98	986.787	1494.96	1283.38	1572.26	1070.89	1241.23	1300.66	1458.83	1086.16	1137.01	1264.8	1302.04
Wls	1854.87	-0.764158	0.238957	-3.19789	0.00138439	0.0149311	1361.13	1711.54	1920.74	2483.37	2389.85	1403.85	1682.42	1723.13	1782.04	1397.69	2742.36	1198.57	2403.98	2286.31	1687.36	1503.49
Sox4	11979.8	-1.42972	0.447237	-3.1968	0.00138963	0.0149763	1949.43	8461.41	8722.56	23085.8	20959.3	7153.65	14187.9	10292.7	13828.3	11136.2	12180.3	8839.47	12756.5	16200.4	12705.6	9216.58
Capns1	11269.6	0.619317	0.193813	3.19543	0.00139621	0.0150358	10697.2	12995.9	10103	6888.29	8741.56	13489.2	11489.3	14755.4	8684.86	13977	12978.4	11885.1	8678.71	9726.16	10329.8	14894
Eif3i	4284.43	0.647523	0.202794	3.193	0.00140801	0.0151515	4713.16	5882.75	4690.91	3577.79	3944.95	5940.45	3878.09	5122.61	3348.46	2480.15	3330.69	5544.85	2297.82	3688.31	4464.94	5644.99
Bex4	13.3159	-7.01152	2.19612	-3.19268	0.00140957	0.0151569	0	40.7779	1.90928	4.39379	28.6708	3.27748	0	0	0	33.2305	1.17446	0	49.1092	0.828073	30.6792	19.0033
Spaca7	47.0056	-2.53914	0.795774	-3.19078	0.0014189	0.0152457	0	21.5217	43.9135	90.512	158.152	24.0349	64.256	24.7381	73.8006	12.0838	23.4892	26.3046	54.6538	53.8247	39.4447	41.36
Sprr2k	5.92921	4.52763	1.4207	3.1869	0.00143808	0.0154401	11.0405	9.06176	2.86393	0	0	1.09249	3.62005	12.7955	3.93603	3.02095	0	14.8678	1.58417	4.96844	7.01239	19.0033
Ihh	11.875	-3.77793	1.18603	-3.18536	0.00144572	0.0155002	6.83982	16.3653	3.16815	39.2749	16.8455	11.3706	15.2305	1.47973	5.90011	10.4807	0	0	52.0693	5.74571	1.52052	3.70974
Mrpl30	1534.8	0.536943	0.168567	3.18534	0.00144585	0.0155002	2028.52	1640.27	1844.84	1288.64	1229.26	1461.83	1509.51	2028.06	1194.34	1522.69	1102.97	1579.6	1365.73	1397.68	1585.92	1776.97
Zcchc14	2036.99	-0.596846	0.187386	-3.18512	0.00144696	0.0155005	1425.55	1655.16	1886.71	2563.49	2435.68	1963.62	2222.2	1497.46	2826.4	2352.38	1713.97	1714.83	2016.87	2356.93	2164.8	1795.87
Cp	5123.66	-2.14403	0.673459	-3.18362	0.00145447	0.0155692	139.012	10250	5416.73	6169.6	8820.27	3595.4	9455.64	1952.85	6272.68	3605.88	2666.72	2147.36	3762.89	4490.78	7318.88	5913.85
Ppp1r15a	3125.56	1.43063	0.449793	3.18065	0.00146946	0.0157173	5242.11	1611.46	2479.49	2203.55	1617.02	9471.48	1935.31	3399.99	1432.54	1679.14	2005.92	6637.94	1847.53	1947.23	2027.33	4470.99
Ugcg	2068.45	1.38164	0.434417	3.18044	0.0014705	0.0157173	4325.18	2041.53	2366.38	1179.55	1108.83	3802.94	1778.8	1457.92	1148.87	900.612	2901.59	2678.17	957.654	1996.39	1793.11	2657.72
Zfp369	178.866	-1.14327	0.359883	-3.17677	0.00148924	0.0159057	112.147	125.006	190.423	237.616	173.924	136.344	189.938	47.4954	228.101	174.076	231.007	157.058	280.065	257.837	213.447	107.365
Ehbp1l1	765.069	1.0094	0.317812	3.17611	0.00149267	0.0159184	1785.4	854.07	840.085	420.925	617.81	786.596	694.145	896.541	644.526	520.611	838.564	812.01	694.658	606.977	557.485	670.703
Rps11	14003.5	0.563875	0.17753	3.17622	0.0014921	0.0159184	14685.4	17465.4	13785	10706.8	11344.4	22076	12210.4	17706.5	10781.8	13943.7	9093.84	17298.1	11565.2	10770.7	13436.6	17185.6
Cldn1	257.938	2.75524	0.867717	3.17528	0.00149692	0.0159518	82.015	304.702	37.231	74.6944	99.8855	199.926	317.66	1065.44	43.2964	219.523	601.324	629.022	88.7134	133.32	89.408	140.848
Hgfac	1911.64	1.35749	0.427811	3.1731	0.00150821	0.0160602	4630.69	2018.51	1430.05	504.407	1162.56	2859.06	1869.76	2381.68	1212.3	1646.42	1269.59	2847.75	2179.82	1021.01	1632.13	1920.45
Arrdc2	130.897	0.812177	0.255979	3.17283	0.00150963	0.0160633	176.648	144.988	117.421	87.8757	109.134	99.4169	140.277	148.428	181.058	132.922	119.795	152.109	74.4559	120.071	120.964	168.794
Sigmar1	1923.89	0.639997	0.201746	3.17229	0.00151241	0.0160809	2265.38	2475.15	2342.58	1513.93	1682.96	2309.23	2014.69	2142.07	1370.31	1188.69	1815.6	2273.1	1091.14	1665.29	2026.54	2605.53
H3f3a	13319.4	-0.336289	0.106039	-3.17135	0.0015173	0.0161209	12753.9	11205.9	12314.5	14391.1	15644.7	10382.1	14331.5	11853.4	15892.9	15097.1	16307.9	10578.5	14381.9	13992.2	14367.2	9616.19
Cenpl	268.217	0.678356	0.213947	3.17067	0.00152087	0.0161468	301.1	289.666	328.201	173.682	145.346	318.854	199.445	286.737	305.665	286.029	287.705	284.536	224.502	237.471	281.887	340.648
Gsap	1038.39	-1.24731	0.393491	-3.16987	0.0015251	0.0161796	542.561	875.592	680.66	1224.11	2321.41	1187.54	1590.11	714.845	1279.21	747.182	667.093	800.573	1342.58	826.416	1242.07	572.333
Lig1	1464.8	0.969288	0.30581	3.16957	0.00152663	0.0161838	1127.36	2521.7	2110.27	871.154	741.328	1758.06	1140.06	2304.12	1100.09	1355.61	1186.12	1878.47	1100.82	1305.03	1210.34	1726.21
Aoc1	301.807	-3.00271	0.947628	-3.16866	0.00153142	0.0162126	66.4229	33.3925	103.66	1434.39	499.051	251.047	705.244	54.7589	484.287	38.1675	375.907	139.437	156.174	230.147	88.5963	168.229
Rpl28-ps1	3673.86	0.705024	0.222502	3.16863	0.00153162	0.0162126	3870.48	3682.47	3420.48	2294.43	3156.57	5215.57	3637.25	5802.35	2935.3	3209.26	2096.41	4366.56	3163.58	3267.57	3966.38	4697.16
Tmem64	167.27	-1.3699	0.432385	-3.16825	0.00153361	0.0162217	70.9745	132.528	159.425	421.803	288.558	170.429	133.037	126.249	165.313	80.5587	204.356	134.954	152.08	171.411	179.693	84.9557
Wfdc18	150.09	-3.46659	1.09432	-3.16779	0.00153602	0.0162351	4.73686	32.8851	18.1582	184.247	349.059	32.811	484.862	58.0705	179.287	19.1538	65.8424	34.3482	548.154	75.4378	313.274	1.11907
Rnf19b	3120.97	1.00813	0.318269	3.16755	0.00153728	0.0162365	3686.04	2664.11	3558.99	2555.51	2491.42	4369.85	2829.72	4975.59	1970.21	1245.94	3212.97	4859.21	1676.8	2735.95	2868.25	4234.94
Nip7	846.908	0.433765	0.136973	3.16679	0.00154129	0.0162668	1014.82	964.344	826.952	735.409	824.451	1065.76	830.776	1080.25	576.458	756.199	731.207	913.371	667.661	757.402	825.471	980.003
Nabp1	457.963	1.13987	0.360059	3.16579	0.00154663	0.016311	901.135	348.358	450.982	416.897	224.891	505.776	291.437	542.429	271.103	298.231	598.091	777.723	364.631	338.511	523.633	473.583
Sidt1	216.302	2.82039	0.890959	3.16557	0.0015478	0.0163114	1571.27	142.176	178.699	26.1421	19.4817	90.649	142.441	125.473	110.051	98.6076	228.559	156.949	215.883	134.618	75.6047	144.225
Tgfb1	1144.03	1.13411	0.358296	3.16529	0.0015493	0.0163151	698.445	1675.68	1097.6	459.935	808.37	2153.35	986.613	1849.25	559.551	1198.8	741.379	1552.71	601.51	1259.43	943.804	1718.06
mt-Nd4l	3434.83	-1.07314	0.339061	-3.16505	0.00155057	0.0163165	3452.52	2677.75	2603.31	6577.5	4338.54	2464.67	3178.41	1277	5231.97	3634.21	5147.66	2233.6	3725.96	3760.28	2954.85	1699.11
Actr1a	5265.91	0.483675	0.152841	3.16456	0.00155315	0.0163281	6807.25	5807.45	5145.52	4953.55	4523.52	4197.36	5087.08	7534.87	4341.45	5525.32	4716.63	5694.36	4853.1	4773.84	4970.03	5323.15
Pdcd4	1086.55	-1.13657	0.359172	-3.16441	0.00155397	0.0163281	538.041	997.521	657.369	2073.21	1649.5	822.544	1292.52	990.268	1533.2	1335.25	932.876	623.283	1013.45	1063.1	1299.33	563.381
Fat4	8.54178	-4.72048	1.49194	-3.16398	0.00155627	0.0163403	1.11475	18.2289	7.68153	10.6064	1.30737	1.54432	10.9233	1.20583	11.8767	6.40552	4.15047	0	52.6245	4.68217	3.52658	0.790075
Nucb1	6827.13	1.03144	0.326057	3.16336	0.0015596	0.0163587	15838.4	5421.2	7721.14	4084.46	4250.68	5979.22	6889.87	5398.87	9291.99	7271.43	7259.34	6599.01	5280.03	5604.4	6201.58	6142.52
Ube2g1	1701.25	-0.364595	0.115261	-3.16322	0.00156032	0.0163587	1440.5	1324.49	1583.43	2099.81	1924.05	1552.69	1759.21	1717.9	1709.78	1786.99	1778.43	1509.59	1994.28	1937.22	1791.74	1309.96
Lca5l	11.8774	-2.63033	0.831622	-3.16289	0.00156212	0.0163655	5.14833	10.3703	7.59785	43.2728	27.7949	6.04452	5.77094	2.63306	5.0576	4.57968	27.654	7.13072	18.1362	10.1634	3.6006	5.08383
Clk3	848.648	0.677684	0.214288	3.1625	0.00156423	0.0163757	859.58	974.139	527.917	753.095	646.481	1477.05	800.937	1118.33	660.27	752.217	736.386	1219.16	601.192	677.363	717.894	1056.36
Nudt17	46.7508	2.41543	0.763999	3.16156	0.00156926	0.0164162	66.9491	42.7495	87.6793	3.49104	9.18552	28.211	24.5793	77.9437	44.9554	10.0011	25.6618	100.255	33.0405	36.1865	59.1985	97.9266
Zbtb39	1101.25	-0.915363	0.289556	-3.16126	0.00157089	0.0164213	1115.09	750.993	983.281	1206.53	1179.2	789.873	942.119	571.535	1046.99	1651.45	1516.23	698.786	2104.57	1191.6	1062.38	809.315
Psmd3	5281.38	0.364101	0.115207	3.1604	0.00157554	0.0164578	5527.36	6614.36	5618.68	4369.16	4595.01	5781.13	4538.77	6364.08	4468.35	4605.69	4547.32	5779.28	4768.7	4676.75	5455.19	6792.32
Gtf3c5	5349.15	2.26723	0.717561	3.15963	0.00157969	0.0164603	29955.6	1881.46	7186.8	2407.08	2550.38	1532.45	5382.11	2338.26	7196.42	2095.67	5919.43	2655.98	2302.14	5132.76	4014.76	3035.01
Ido1	26.0031	7.7014	2.43754	3.1595	0.00158039	0.0164603	345.231	6.52398	1.83278	0	0	1.12269	0	0	0	0	53.1045	1.17529	1.62795	2.38467	0.900776	2.14609
Pqlc3	185.039	1.92549	0.609393	3.15968	0.00157941	0.0164603	641.711	122.144	138.672	64.5287	76.5679	356.907	83.1552	128.25	76.4522	198.067	305.208	172.513	106.398	147.266	132.404	210.371
Sms	820.925	0.659651	0.208765	3.15978	0.00157889	0.0164603	788.158	1023.49	913.894	709.252	614.326	1303.18	703.726	1044.03	627.248	576.547	687.673	1183.64	588.65	681.845	842.84	846.301
Zfp719	349.233	-0.686413	0.217303	-3.15879	0.00158427	0.0164887	243.514	306.431	331.563	559	375.398	225.962	395.295	247.671	432.847	363.75	391.173	338.21	399.186	396.417	368.554	212.751
Gfod1	82.7603	1.55898	0.493687	3.15784	0.00158942	0.0165181	115.136	53.2378	82.0992	57.1192	32.3703	167.152	57.0159	106.63	29.5203	25.1746	73.991	168.12	42.7725	61.2774	81.5191	171.029
Setd3	4415.4	0.566093	0.17926	3.15794	0.00158889	0.0165181	6651.92	4658.83	4382.42	3267.03	3573.76	5690.05	3959.03	4509.71	3720.08	4507.88	3836.21	4984.75	4059.75	3636.99	4672.19	4535.86
Vdac1	7870.27	0.431842	0.13677	3.15743	0.00159164	0.0165292	10303.7	9384.83	8033.14	6784.16	6820.62	10775.7	6811.83	7869.26	7097.7	6904.65	5759.75	9361.88	6801.31	6786.69	7480.83	8948.28
Abca7	2293.29	0.805296	0.255138	3.15631	0.00159776	0.0165566	3476.85	2784.85	2874.16	1388.46	1479.68	1833.51	2101.44	2189.1	2199.09	1633.81	2790.91	2490.1	1796.6	2328.84	2499.11	2826.13
Polh	358.735	0.660698	0.209325	3.15633	0.00159767	0.0165566	444.774	382.859	450.591	261.87	258.037	365.985	352.955	506.704	321.771	363.521	221.973	418.586	346.933	341.994	360.262	340.941
Ywhah	8653.37	0.515256	0.163225	3.15671	0.00159558	0.0165566	10408.2	10193.8	9812.3	7860.14	7050.78	10897.3	7195.6	9788.75	5922.56	6598.51	8301.04	10106.1	6290.78	7572.23	8997.73	11458.2
Cbfa2t3	351.106	1.12142	0.35543	3.15512	0.00160431	0.0166124	356.657	433.022	378.242	146.291	210.18	220.159	288.944	428.412	242.646	624.067	550.143	504.896	235.999	376.366	283.883	337.791
Zfp385b	26.6918	-5.21156	1.6528	-3.15317	0.00161509	0.0167119	1.19464	50.7063	0	23.2204	139.429	123.972	18.0272	1.39599	21.9303	5.18872	1.71445	2.59879	30.5352	7.15575	0	0
Chd5	75.7304	2.97009	0.942159	3.15242	0.00161921	0.0167424	13.0389	30.5378	30.5818	7.3836	14.3364	332.455	26.6147	78.4031	75.5939	27.0556	14.8023	115.335	4.91113	32.5172	141.82	266.301
Dopey2	2005.92	-1.08775	0.345111	-3.15188	0.00162222	0.0167492	2550.35	1522.37	1528.38	3116.95	3368.36	1316.46	1927.68	773.704	2587.94	1881.05	2413.52	1020.16	2736.65	2057.76	1911.75	1381.65
Shc1	4794.82	0.510326	0.161911	3.1519	0.00162212	0.0167492	4803.74	6317.61	4666.98	3049.3	3872.35	4752.26	4614.03	4748.69	4923.47	4936.35	4290.62	5391.26	3570.06	4603.45	4740.39	7436.63
Dapk2	119.462	1.90186	0.603525	3.15126	0.00162569	0.0167729	347.39	64.8449	125.974	52.0116	64.1632	21.2007	81.7302	310.385	56.4963	58.624	243.867	98.7631	86.0777	124.006	121.622	54.2314
Ndrg1	14394.7	2.03875	0.647039	3.15089	0.00162772	0.0167818	23163.1	4758.27	7898.91	3771.34	5217.44	67151.8	9421.87	13949.9	4558.58	12942.5	6174.78	30629.3	7497.78	7626.6	8357.43	17195.6
Fam210b	1010.53	-1.34972	0.428401	-3.1506	0.00162937	0.0167862	452.66	795.169	562.284	1686.34	1593.54	591.039	1179.23	664.516	1460.27	2436.9	554.345	566.12	1013.08	1007.76	840.611	764.601
Smarcad1	274.445	-0.92632	0.294033	-3.15039	0.0016305	0.0167862	182.957	212.951	273.982	450.802	262.662	156.227	311.325	231.173	368.019	413.871	253.683	154.396	369.111	269.952	209.495	270.517
Clcn4-2	1532.06	-0.858041	0.272588	-3.14775	0.0016453	0.0169144	1501.51	565.227	1456.78	2385.83	1952.39	1102.33	1849.85	1025.35	2053.63	1858.89	1314.22	993.855	2038.03	1711.63	1590.06	1113.37
Fut8	1213.34	1.29849	0.412528	3.14764	0.00164593	0.0169144	2583.18	1080.6	1227.36	530.743	442.701	1099.91	1221.26	753.527	1059.02	2138.36	1240.23	1178.39	860.16	1096.46	1706.26	1195.27
Usmg5	1566.71	0.463768	0.147353	3.14733	0.0016477	0.0169144	1898.96	1535.97	1497.83	1696.88	1354.93	1428.98	1461.6	2547.17	1343.17	1406.76	1362.37	1777.27	1465.36	1527.79	1420.89	1341.41
Zfml	725.77	-0.712645	0.226428	-3.14734	0.00164763	0.0169144	575.12	551.09	701.52	1063.54	570.442	425.215	704.49	418.752	962.563	1061.64	1000.29	575.606	933.181	832.704	772.233	463.924
C330007P06Rik	867.959	-0.501879	0.159514	-3.14629	0.00165354	0.0169621	721.176	925.93	934.227	1084.47	847.606	731.429	862.265	768.981	954.9	969.697	992.285	582.847	1003.87	980.84	824.98	701.846
Pmf1	605.832	0.782572	0.248755	3.14595	0.00165547	0.0169698	555.723	773.958	811.782	411.287	307.362	823.305	469.655	856.263	455.071	495.943	516.937	739.906	533.379	571.413	625.992	745.342
Dcun1d4	1409.04	1.12856	0.358784	3.14552	0.00165791	0.0169826	2789.05	1991.19	1365.41	831.656	789.277	1005.88	1271.4	1341.92	1312.39	1590.14	1223.78	1590.35	991.791	1402.88	2228.79	818.746
Obsl1	163.769	-2.43235	0.773694	-3.14382	0.00166758	0.0170694	23.648	220.094	34.1733	131.623	181.114	125.583	39.9862	11.9344	52.1122	899.093	464.336	42.6636	80.828	79.9974	103.971	129.141
Mxi1	1030.02	1.06584	0.339092	3.1432	0.00167111	0.0170933	1306.86	787.896	680.209	560.179	889.774	1673.81	974.91	1995.37	991.156	1269.74	700.405	1158.98	682.151	959.626	986.204	863.082
Krba1	335.993	-1.58278	0.503689	-3.14238	0.00167578	0.0171288	135.799	172.753	203.522	508.475	251.7	159.578	125.778	231.334	469.013	1182.45	320.778	158.176	821.153	291.496	160.201	183.685
Rps28	7562.7	0.529282	0.168484	3.14143	0.00168125	0.0171724	7385.33	8634.29	6965.96	5696.02	6428.14	10956.8	7528.83	9908.01	6261.86	7314.13	5006.01	9192.63	6231.63	6633.01	7687.48	9172.99
Ydjc	286.111	0.937037	0.298428	3.13991	0.00168998	0.0172492	482.627	329.621	315.032	196.842	196.996	436.998	141.182	331.831	215.498	246.711	214.926	456.327	268.517	229.376	255.952	259.339
Mbp	4537.92	-0.542138	0.17285	-3.13646	0.00171002	0.0174413	5124.68	3916.78	4192.26	6137.94	5656.53	3621.09	4090.77	3239.77	5447.74	4035.47	4863.2	3781.07	5879.01	4478.37	3918.54	4223.49
Ascc2	2394.12	0.487265	0.155373	3.13611	0.00171207	0.0174497	3339.06	2299.39	2330.2	1981.84	2089.87	3398.4	2065.11	2536.92	1966.61	1841.74	2090.56	2911.09	2192.06	2187.2	2294.75	2781.06
Gdpd3	49.8654	2.04956	0.653791	3.13489	0.00171919	0.0175053	64.6657	32.8489	19.0928	22.8477	49.0179	57.9022	47.0607	49.4761	27.5522	30.2095	16.4424	241.316	14.2575	24.0141	50.8398	50.3027
Mlf2	8108.96	0.460665	0.146969	3.13445	0.00172178	0.0175053	11901	9061.45	8197.86	7503.08	7101.21	7193.38	7085.08	9521.73	8173.56	8006.35	7115.14	8298.85	6988.46	7348.52	7686.77	8560.84
Msrb1	980.705	0.717396	0.228856	3.13471	0.00172025	0.0175053	1872.51	1028	982.198	790.681	727.475	853.077	900.158	1136.88	978.698	1082.33	816.377	959.349	891.917	820.618	921.679	929.333
Rps23-ps	3586.09	0.593518	0.18936	3.13434	0.00172244	0.0175053	3588.16	4404.01	3166.55	2537.85	3433.1	5906.02	3087	5190.73	2336.04	2077.41	2557.97	4762.27	3006.75	2867.62	3729.72	4726.22
Serpinb7	198.416	3.8837	1.23951	3.13326	0.00172874	0.0175459	45.1657	232.955	525.291	18.5276	6.49991	3.29317	54.4375	274.92	88.1078	42.4958	1453.6	128.603	5.37216	107.836	72.7056	114.858
Tnks	3362.6	-0.603258	0.192535	-3.13324	0.00172889	0.0175459	2843.71	3015.3	2918.34	4322.61	3728.13	3102.68	3614.62	1911.66	4312.91	3437.84	3899.21	2868.34	3523.98	4241.39	3354.55	2706.29
Atp5o	4547.72	0.429736	0.13717	3.13286	0.00173111	0.0175559	5544.3	4993.93	5049.07	3635.36	3667.8	5239.99	4200.72	5459.93	4309.2	4456.02	3545.36	4790.2	4420.31	4164.89	4660.14	4626.3
Cks1b	1640.86	0.870648	0.277947	3.13243	0.00173366	0.0175693	1213.55	2501.46	1904.69	977.629	995.036	2245.24	1371.59	2577.11	970.17	1606.63	1517.85	2114.24	1258.48	1318.42	1436.48	2245.19
Cyfip1	7043.91	0.368242	0.117598	3.13137	0.00173993	0.0176203	9418.83	7712.79	6859.25	6202.52	6093.48	6942.28	6855.82	6880.48	6714.76	7309.18	7339.31	7646.97	6245.41	6640.1	6280.37	7561.08
Ccnb2	1423.78	1.45138	0.463859	3.12893	0.00175446	0.0177402	1129.28	2360.59	2121.21	489.468	246.939	2125.99	833.517	2025.11	1051.91	1606.14	1041.75	1968.27	1136.64	1368.8	1377.94	1896.97
Cdca3	941.466	1.53256	0.489907	3.12827	0.00175839	0.0177402	910.342	1431.15	1508.43	289.224	165.702	1535.84	486.639	1318.25	691.834	905.701	639.041	1442.2	813.986	795.483	851.886	1277.75
Maml3	625.781	-0.798243	0.255182	-3.12813	0.00175923	0.0177402	326.372	574.936	756.374	802.206	765.344	548.046	869.565	428.222	800.682	368.919	555.706	477.724	579.594	827.528	778.248	553.033
Procr	585.276	1.71325	0.547513	3.12914	0.00175319	0.0177402	344.604	962.045	700.41	119.627	391.21	547.266	537.028	941.861	649.006	247.269	736.59	716.079	102.067	423.838	815.262	1130.25
St8sia3	45.1544	-4.10264	1.31127	-3.12874	0.00175556	0.0177402	7.40207	199.768	6.25685	49.9977	211.328	150.847	19.2612	4.00332	25.3956	2.62133	8.26739	5.36712	18.027	1.34725	11.49	1.09121
Zfp619	37.3688	-1.81437	0.580012	-3.12817	0.001759	0.0177402	14.1949	49.8397	21.9568	76.4519	54.5671	10.9249	23.5304	17.0607	46.2484	69.4819	35.2338	21.7299	56.238	57.137	25.4199	17.8854
Zfp281	456.408	-0.807689	0.258231	-3.12778	0.00176131	0.0177487	306	322.92	457.235	699.127	376.451	233.814	457.167	290.813	524.532	660.296	671.86	321.395	530.853	599.609	446.796	403.658
Ep400	3394.23	-0.432962	0.1385	-3.12608	0.00177155	0.0178393	2505.85	3606	3562.14	3877	3626.59	3688.4	3417.89	2579.52	2887.59	3686.67	3397.15	3287.5	3802.06	3697.09	3634.18	3052.11
Ckap2l	1031.48	1.33733	0.428078	3.12403	0.00178392	0.0179258	878.507	1661.7	1798.55	420.046	204.395	1436.63	651.61	1387.04	835.423	1162.06	822.122	1210.01	750.896	1130.32	1009.78	1144.67
mt-Nd4	37946.6	-0.884062	0.282978	-3.12414	0.00178327	0.0179258	39651.1	26582.7	29567.2	73071.3	48267.8	26080	35602.3	23920.9	57315.6	37569.6	50007.3	24679.4	41528.2	41793.7	34017.1	17491.9
Prc1	2233.46	1.10386	0.353362	3.12389	0.00178478	0.0179258	2131.29	3369.35	3332.36	1289.21	689.781	2527.26	1473.39	3279.44	1823.81	2752.47	1966.47	2538.21	1719.41	2387.64	2044.72	2410.56
Ttll6	25.2082	-3.38152	1.08249	-3.12383	0.00178516	0.0179258	1.60439	5.76118	2.66503	101.988	16.9344	11.1132	54.6649	1.73547	77.317	15.365	17.9204	11.6338	37.8694	26.9627	10.6998	9.09678
Gm14421	27.3669	-3.19248	1.02266	-3.12175	0.00179779	0.0180317	0	24.9198	41.0496	47.4529	46.2433	14.2024	26.2454	13.6486	48.2164	50.3492	10.5701	0	41.1884	54.6528	15.7779	3.35352
Zfp715	260.588	-0.924178	0.296052	-3.12168	0.00179824	0.0180317	212.488	127.896	201.241	346.208	300.553	157.253	312.268	142.637	298.542	343.542	414.674	178.79	361.426	248.942	231.941	291.007
H3f3b	18294.2	-0.512343	0.164154	-3.12112	0.00180165	0.0180355	13549.4	16917.8	17352.2	23459.6	26222	17686.3	21721.1	18965.7	17612	15521.7	16875.9	16553.7	20319.4	16091.8	16180.7	17677.4
Sdhb	2727.35	0.497847	0.159515	3.12099	0.00180241	0.0180355	3611.78	2817.99	3014.75	2650.04	2580.31	2952.11	2889.36	3288.03	2394.1	1687.68	2213.97	3240.76	1950.45	2605	2654.69	3086.55
Zan	109.294	-2.43215	0.779284	-3.12101	0.00180234	0.0180355	17.2506	52.6701	44.1569	88.0294	218.733	159.404	21.5054	64.0795	200.953	202.664	72.7292	15.9596	201.912	211.652	107.445	69.5512
Ankrd6	25.8577	-2.31637	0.742528	-3.11957	0.00181115	0.0180982	9.83041	23.6186	5.82529	114.91	70.0581	16.9138	5.06106	9.99593	19.2561	4.22796	12.8103	31.1386	37.1608	4.31661	22.8463	25.7522
Zc3h12a	4460.56	0.609775	0.195468	3.11956	0.00181122	0.0180982	5144.74	5841.74	4132.8	2603.81	4489.54	5658.49	4992.42	4912.88	3684.12	3731.66	4271.63	5551.96	3134.95	4648.97	3925.71	4643.61
Tat	32.7709	6.10335	1.95702	3.11869	0.00181659	0.0181289	437.434	0.79122	2.00049	2.38941	2.51478	0	0	0	1.37469	1.40678	68.0912	3.19549	1.65984	2.2516	1.22456	0
Zfp810	311.282	-1.17468	0.376664	-3.11865	0.00181682	0.0181289	104.096	185.766	205.248	517.588	517	251.274	345.715	331.831	394.587	339.354	265.428	208.149	427.725	394.163	350.62	141.965
Gm4604	33.0903	1.16656	0.374243	3.11711	0.00182633	0.018211	48.8936	44.1761	30.5485	17.5751	16.6476	65.5496	18.1003	34.9745	25.5842	33.2305	32.8849	48.0344	23.7625	23.186	27.173	39.1243
Calm3	13531.7	0.612264	0.196437	3.11685	0.00182796	0.0182145	23850	13101.4	13740.8	10060.4	11480.7	11527.3	12353	13986	14801.7	14405.1	12568	14253.7	12527.9	12870.7	12261.4	12719.8
Raet1d	48.0845	-6.92403	2.22356	-3.11394	0.00184604	0.0183819	0	94.0741	96.5806	0.948483	2.99475	4.71671	0	0	8.49668	140.854	170.696	0	73.2592	53.924	0	122.807
Ccpg1	1551.74	-0.909294	0.292124	-3.1127	0.00185386	0.0184339	1369.94	1420.97	1413.93	2128.46	2466.02	960.798	2035.59	806.217	2421.96	1274.6	1413.14	1125.99	1601.9	1683.06	1522.38	1182.88
F2r	1057.97	2.03393	0.653428	3.1127	0.00185383	0.0184339	570.951	2357.19	863.951	108.966	332.027	1663.87	813.607	2325.38	185.978	343.382	1119.26	1627.45	663.767	1069.87	1319.21	1562.74
Ndufa11	1173.25	0.539912	0.173563	3.11076	0.00186605	0.0185422	1654.49	1313.95	1220.99	919.18	972.034	1035.68	992.8	1459.55	984.993	1343.32	1217.92	1250.04	1108.13	956.424	1073.77	1268.75
Rras	3882.01	0.583277	0.18758	3.10948	0.00187417	0.01861	4804.19	3726.65	4167.01	3243.49	3263.85	3568.09	3601.95	5523.41	3491.26	3915.15	4380.74	3745.54	2887.15	3349.55	3362.44	5081.69
Gm12918	4039.06	0.778938	0.250563	3.10876	0.00187877	0.0186297	3960.38	4006.43	3971.31	2567.73	3479.34	6558.24	3701.51	6629.8	3109.47	3626.15	2287.85	5509.09	3337.84	3470.45	3996.19	4413.23
Rad51ap1	138.546	1.45427	0.467774	3.10892	0.00187773	0.0186297	87.1858	185.148	231.445	59.6411	41.0997	128.823	69.9595	257.51	131.914	137.409	133.554	191.668	94.3793	157.245	125.277	184.471
Jund	4864.66	0.562221	0.180891	3.10805	0.00188323	0.018661	6376.67	3683.6	4137.42	4369.18	3982.47	4608.14	5656.33	6350	5143.41	4702.62	5242.79	5562.84	4034.88	3974.75	4274.93	5734.51
Itih2	17.0887	-5.48412	1.76468	-3.10771	0.00188542	0.0186697	0	9.39108	1.95043	20.2376	119.277	70.4479	16.6413	0	6.0313	3.71051	0	3.16064	5.8373	3.81407	12.9195	0
Arvcf	777.468	-1.24331	0.400106	-3.10745	0.00188706	0.018673	218.96	791.519	564.272	1423.28	1223.62	414.782	791.622	640.108	1188.84	755.903	758.91	562.845	730.492	730.09	748.775	895.472
Eif4e2	2974.82	0.535795	0.172449	3.10698	0.00189009	0.0186881	3747.69	3508.83	3179.82	2527.09	2573.58	2887.57	2459.01	3680.61	2118.59	2645.73	3237.13	3277.61	2284.26	2800.56	2920.72	3748.33
S100b	116.598	-3.15181	1.01449	-3.10681	0.00189121	0.0186881	6.30885	62.2996	76.3714	359.412	234.916	142.024	140.277	10.2364	368.019	62.433	4.69784	58.3275	72.8718	107.649	106.062	53.6562
Tmem180	561.378	1.39527	0.449354	3.10505	0.00190247	0.0187864	1555.72	333.988	365.318	205.235	256.523	603.934	392.553	877.962	393.316	659.567	409.499	836.522	781.484	342.691	387.71	580.023
Zkscan1	1266.56	-0.584104	0.18815	-3.10446	0.00190625	0.0188107	1116.56	886.536	1046.21	1798.83	1458.51	997.53	1405.96	898.118	1742.77	1289.78	1273.5	1122.95	1440.92	1501.25	1404.78	880.751
Fam57a	956.767	0.923072	0.29742	3.10359	0.00191186	0.0188531	1715.96	909.035	1224.98	657.999	461.786	1153.6	942.582	839.675	948.243	969.726	716.996	1120.43	815.893	743.274	876.051	1212.04
Ak2	2237.32	0.736364	0.237364	3.10226	0.00192047	0.0189249	3031.05	2749.12	2482.93	1974.47	1831.28	3007.23	2097.08	2771.58	2054.56	1076.73	1917.65	2825.86	1373.42	1800.76	2355.82	2447.62
Tnik	18.6981	-3.87532	1.24946	-3.1016	0.00192477	0.0189542	1.6007	62.0508	2.93332	40.4277	26.1067	60.707	12.3943	0	13.8923	0	31.1272	4.22404	18.7469	7.56053	12.617	4.78116
Sox12	142.577	-2.83296	0.91349	-3.10124	0.00192709	0.0189639	44.0568	55.3704	50.4749	466.38	169.768	166.752	47.8509	66.3776	80.4956	526.397	56.2392	7.98658	209.4	28.326	219.487	85.8676
Cul4b	1222.25	-0.506748	0.163571	-3.09804	0.00194808	0.0191572	962.888	1024.42	1253.36	1511.4	1172.99	767.29	1199.64	1076.91	1422.65	1317.82	1613.31	989.573	1621.86	1463.4	1301.55	856.974
Napsa	27.8648	-2.292	0.740128	-3.09676	0.00195651	0.0192019	4.73041	4.52971	12.4071	35.1412	67.4978	17.4754	52.4772	9.38098	33.4477	16.1076	30.5281	22.9622	80.7717	17.385	17.5265	23.4686
Nceh1	785.335	-0.634779	0.204982	-3.09675	0.00195657	0.0192019	656.747	644.174	883.148	1161.38	776.388	545.036	797.626	519.4	1093.93	706.095	823.529	664.45	916.345	818.917	867.684	690.513
Ptpn23	3093.79	0.760516	0.245587	3.09673	0.00195665	0.0192019	3420.97	3237.31	3221.92	1247.84	2773.67	4659.49	3037.23	3374.61	2488.56	2540.62	2852.76	3905.65	2295.46	3077.12	2960.98	4406.52
Trim15	1215.9	1.61789	0.522624	3.0957	0.00196349	0.0192557	3308.92	555.11	1070.32	446.005	756.245	2126.13	601.279	1342.9	548.655	830.912	1890.64	2092.79	994.643	811.122	806.327	1272.46
Dsg1a	7.18666	-4.90448	1.58474	-3.09482	0.00196935	0.0192999	0	2.26544	1.90928	39.5441	11.0984	2.18499	13.5752	1.70607	12.7921	1.00698	8.22122	0	11.0892	0.828073	8.76549	0
Uhmk1	4387.06	-0.646742	0.209012	-3.09429	0.00197287	0.0193211	4504.9	3589.62	4095.73	6441.01	5051.37	3322.62	4893.41	2684.43	5119.67	3922.64	5419.76	3459.33	5170.37	5287.66	4204.96	3025.49
Inca1	24.8504	-1.56325	0.505266	-3.09391	0.00197537	0.0193324	6.56551	30.6489	12.7539	36.1122	42.3497	29.5604	13.0876	18.0927	44.0338	22.007	33.5038	13.3773	38.7267	16.3735	26.4541	13.9598
Fen1	1001.95	0.871901	0.281863	3.09335	0.00197908	0.0193553	962.067	1572.44	1378.32	634.195	534.354	1013.18	754.791	1536.91	766.275	946.796	1076.43	994.626	741.534	972.706	821.576	1325.03
Cnpy2	1382.05	-0.422661	0.13674	-3.09098	0.00199496	0.0194963	1140.32	1336.61	1068.24	1556.28	1742.45	1199.56	1357.52	1353.77	1706.27	1581.97	1375.29	1198.57	1657.04	1145.22	1313.07	1380.53
Hk2	5563.74	1.66355	0.538226	3.09079	0.00199622	0.0194963	5622.4	5452.52	4062.83	990.915	2545.35	9405.31	4652.33	11687.7	1992.51	9523.61	4039.3	7774.88	4381.59	5612.61	5732.39	5543.56
Sbsn	328.39	-1.33664	0.432501	-3.09049	0.00199827	0.019503	129.449	149.694	258.148	270.249	335.295	161.099	755.424	225.442	451.596	559.683	519.454	104.037	556.085	264.59	337.958	176.039
Mpi	1552.45	1.15303	0.373196	3.0896	0.00200428	0.0195482	4409.16	1599.73	1002.04	1129.56	896.526	1243.89	1155.55	1261.03	1413.37	1544.45	1846.35	1688.95	1280.85	1363.21	1530.62	1473.95
2810403A07Rik	906.351	0.383075	0.124038	3.08836	0.00201267	0.0196052	1157.67	880.123	830.538	737.277	947.062	931.897	802.747	1055.21	857.072	786.455	872.624	1072.77	833.273	975.47	898.463	862.971
Prpf39	229.106	-0.9663	0.312908	-3.08812	0.00201424	0.0196052	160.944	135.042	228.551	355.985	283.365	60.7712	180.129	166.068	280.668	441.634	262.237	164.365	320.968	291.146	198.289	135.526
Zbtb9	583.947	-0.474708	0.153711	-3.08832	0.00201293	0.0196052	466.855	461.017	568.012	701.248	735.268	613.982	666.09	551.915	576.629	571.967	641.255	465.476	631.291	584.619	520.67	586.865
Yipf4	466.546	-0.633408	0.205191	-3.08691	0.00202246	0.0196718	493.667	321.692	439.135	711.793	502.202	364.893	491.422	360.834	510.7	499.464	594.277	309.936	585.35	549.012	433.015	297.345
Ing4	1895.91	-0.644998	0.20896	-3.0867	0.00202392	0.0196726	1232.04	1851.8	1533.76	2313.88	2683.32	1528.01	2137.66	1830.11	2539.93	1925.85	2065.59	1395.84	1981.52	2115.38	1777.97	1421.83
Pgm3	890.251	0.971489	0.314774	3.0863	0.00202663	0.0196855	1819.3	987.046	874.803	409.488	703.71	985.557	802.22	942.649	1001.25	671.069	1035.1	825.471	713.951	956.966	707.378	808.071
Itgb3	13.6403	-3.57125	1.15732	-3.08579	0.00203011	0.0197059	5.68762	16.3389	3.43208	15.8445	50.7067	46.1502	4.06707	4.10154	5.30649	13.576	4.23542	0	44.7496	1.99076	1.05365	1.0047
Hkdc1	71.2882	-4.07746	1.32169	-3.08504	0.00203528	0.0197426	16.5675	71.3905	3.08549	3.55028	233.161	388.767	12.8606	0.689273	3.97551	27.5484	5.69394	16.2521	318.484	4.01461	23.9801	10.5899
Tfrc	4824.26	0.709691	0.230085	3.08448	0.0020391	0.0197528	5808.5	4778.28	5937.31	2821.21	2967.54	6305.3	5558.24	5614.29	3344.96	5276.38	3997.27	5460.53	4533.46	5739.89	4898.29	4146.79
Tgfbr1	1015.6	-1.41731	0.459489	-3.08453	0.00203877	0.0197528	200.224	733.097	765.231	1549.27	2280.83	568.086	1125.52	809.345	1112.62	1589.58	857.263	773.47	939.177	1449.32	878.532	618.086
Zfp2	93.1879	-1.18728	0.384996	-3.08389	0.00204315	0.0197786	19.2249	59.0475	91.3137	183.975	127.599	94.615	88.1291	77.6581	93.7251	106.875	86.8159	93.0624	137.012	92.1675	82.8263	56.9606
Ptrh1	659.851	1.38262	0.448401	3.08344	0.00204624	0.0197951	2007.8	488.105	760.162	466.984	475.501	718.573	358.23	765.479	332.214	441.61	994.555	814.327	432.423	398.484	489.741	613.428
Zfp420	55.7834	-0.970654	0.315121	-3.08026	0.00206823	0.0199943	49.3378	45.6243	52.4605	76.5536	63.2957	35.4667	57.7353	38.2809	67.4593	45.745	42.5379	32.5536	92.8343	75.2591	72.7218	44.6686
Rrad	47.8707	-2.13385	0.692876	-3.07969	0.00207213	0.0200049	6.30885	33.9816	37.231	121.268	146.129	46.9772	38.9156	20.4729	29.5203	19.1327	70.4676	40.0287	29.3071	65.4177	35.062	25.7103
Scrn1	7.06113	7.59965	2.46762	3.07976	0.00207171	0.0200049	0	0.739619	0	0	0	8.59941	3.1307	8.35497	3.8551	0	0	84.9275	0	1.0814	2.2894	0
Rac1	10477.4	0.520784	0.169133	3.07915	0.00207593	0.020028	16100.1	10063.2	10691.2	9233.66	8153.51	11115.8	10057.1	10884.6	9889.11	8542.87	10741.4	11726.3	9586.85	9602.29	11925.9	9324.69
Pbrm1	1690.25	-0.86623	0.281436	-3.07789	0.00208468	0.0200989	1197.39	1234.16	1300.04	2137.16	1656.96	1246.45	2115.02	812.342	3052.12	2593.58	1502.65	1324.52	2278.44	1888.69	1575.97	1128.53
Pou6f1	295.056	-2.12571	0.690787	-3.07724	0.0020893	0.0201298	7.40398	158.947	358.941	651.458	588.247	229.03	364.329	225.331	355.3	367.978	287.566	95.8491	201.454	222.949	325.567	280.551
Clspn	380.172	1.41907	0.461429	3.07538	0.00210235	0.0202006	392.246	700.292	652.76	207.245	68.887	362.265	240.831	481.628	438.147	223.942	436.212	344.331	178.62	552.032	308.115	495.206
Kif2c	572.389	1.13442	0.368851	3.07556	0.0021011	0.0202006	401.004	989.906	867.213	363.379	169.425	756.021	345.485	848.932	483.761	471.339	420.667	669.388	342.632	666.835	584.649	777.585
Uqcr11	1852.05	0.340713	0.11077	3.07586	0.00209894	0.0202006	2436.51	2154.8	1730.94	1684.91	1660.03	2082.18	1648.29	2099.18	1768.31	1656.6	1454.36	1996.53	1807.06	1627.39	1816.46	2009.32
Vasn	1509.53	-0.922325	0.299925	-3.07518	0.00210373	0.0202006	613.137	1304.17	1320.68	1918.1	2385.1	1223.08	1941.8	1391.6	1724.74	1728.63	1171.8	989.507	1380.05	1794.41	1714.82	1550.88
Wrap53	430.294	0.594987	0.193445	3.07574	0.00209983	0.0202006	510.873	571.017	480.537	321.173	384.318	432.372	382.465	616.825	393.244	284.338	292.579	467.29	351.5	391.43	414.967	589.769
Adamts4	89.3261	2.62518	0.854144	3.07347	0.00211587	0.0202648	24.7524	35.4514	26.2184	21.5485	29.9365	34.2908	43.497	248.503	34.7464	55.354	41.9931	240.063	31.854	211.179	202.907	146.924
Aurkb	685.863	1.58094	0.514416	3.07327	0.00211729	0.0202648	629.581	1088.61	1110.58	264.593	107.829	1096.36	264.196	1011.86	387.87	674.734	592.046	1019.01	516.574	589.094	583.901	1036.97
Cluap1	322.034	-0.573255	0.186531	-3.07324	0.00211751	0.0202648	291.65	238.408	274.505	543.11	447.097	258.549	303.639	294.391	322.504	332.193	367.556	313.988	350.287	280.669	234.115	299.881
Pex10	157.196	0.795751	0.258893	3.07367	0.00211444	0.0202648	167.275	146.14	174.077	115.805	132.629	161.739	158.04	179.4	192.046	98.7091	151.576	249.844	95.0556	163.568	182.555	146.685
Slc25a45	485.628	-0.948251	0.308511	-3.07364	0.00211466	0.0202648	283.969	547.216	444.197	382.702	774.232	376.623	631.349	398.979	682.91	394.072	460.303	241.86	630.825	491.315	549.474	480.014
Clic1	19771.9	0.478897	0.155877	3.07229	0.00212426	0.0202982	23354.1	21583.7	19513.3	14687.9	19175	19082.2	20357.1	24597.3	17040.8	20424.7	19638.1	20654.9	15365.3	16284	19638.2	24954.1
Dph1	304.894	-0.692132	0.225293	-3.07214	0.00212527	0.0202982	205.474	315.029	297.185	430.646	441.02	350.626	301.283	250.867	307.867	223.689	207.862	266.789	306.761	250.337	374.362	348.502
Zfp760	67.0896	-1.45791	0.474516	-3.07241	0.00212334	0.0202982	12.6177	58.9014	41.0496	131.814	92.4865	43.6998	82.3562	40.9458	94.4648	108.754	66.9442	44.6034	50.6934	84.4634	64.8646	54.7741
Fam46a	1078.61	2.40793	0.784013	3.07128	0.00213141	0.0203432	6087.63	382.537	1223.19	289.683	301.153	188.331	775.497	330.221	1773.67	561.227	1744	611.062	733.028	746.298	1014.44	495.836
Usp9x	4403.64	-0.577547	0.188102	-3.0704	0.00213774	0.02039	4266.4	3519.43	3900.46	6447.4	4483.76	3658.2	4625.1	3323.68	4519.42	4609.78	6002.3	3593.53	5752.29	4881.62	4015.68	2859.14
Lsm12	1505.69	0.545778	0.17778	3.06996	0.0021409	0.0204065	2245.92	1808.92	1673.7	1522.92	1307.03	1611.26	1448.01	1524.13	1120.47	1159.79	1256.63	1868.42	1028.08	1390.66	1419.84	1705.22
Zfp146	782.777	-0.71893	0.234205	-3.06966	0.00214303	0.0204131	413.847	704.96	702.287	952.31	1029.06	737.306	844.101	538.15	914.549	1178.31	701.879	749.817	824.534	837.523	727.759	668.04
Trpm7	955.518	-1.04374	0.340112	-3.06882	0.00214908	0.0204571	726.275	791.16	835.395	1770.3	932.748	731.591	1036.61	475.492	1157.96	1330.89	1304.41	736.591	1290.07	1191.11	615.442	362.253
Mmp20	43.7123	-2.38672	0.777868	-3.06828	0.00215292	0.0204691	23.6582	13.5926	27.6846	63.2705	24.9714	34.9598	24.4354	31.5624	16.7281	30.2095	29.3615	18.2988	297.032	40.5756	9.64204	13.4141
Zfp236	1124	-0.647807	0.211133	-3.06824	0.00215321	0.0204691	1114.41	783.821	997.224	1399.02	1486.81	959.088	959.498	690.964	1402.36	985.374	1453.27	1073.27	1615.46	1021.13	1209.9	832.487
Zfp951	107.119	-1.59817	0.52091	-3.06803	0.00215473	0.02047	53.9571	68.2874	134.576	201.349	49.9757	59.5752	216.288	53.4168	95.8597	113.909	147.809	28.0555	155.719	68.1456	172.827	94.1509
Ralgps1	516.989	-0.744177	0.24267	-3.06662	0.00216494	0.0205532	256.561	369.994	414.513	750.035	719.909	449.767	572.429	415.112	615.32	606.24	590.343	548.173	576.172	531.331	486.818	369.099
Ephb2	2284.89	1.2402	0.404524	3.06583	0.00217067	0.0205939	3900.83	2775.56	2014.57	849.76	2137.04	2919.51	2573.98	2851.7	974.31	2326.48	3148.77	2542.69	947.269	1805.35	2352.14	2438.19
2610008E11Rik	162.725	-1.01219	0.330175	-3.06562	0.00217221	0.0205949	70.9745	124.599	128.877	252.203	195.147	101.602	204.533	145.869	265.682	164.138	170.297	105.218	208.318	217.783	177.939	70.4238
Kctd7	271.128	0.780495	0.254636	3.06514	0.00217569	0.0206141	399.086	271.531	265.259	178.384	142.117	244.865	301.382	197.999	320.799	317.922	242.434	289.388	191.539	334.523	325.368	315.458
Gm10509	12.6417	-1.95957	0.639362	-3.06487	0.00217761	0.0206187	4.73163	3.39816	14.3196	23.7264	18.4973	6.55496	18.1003	2.55911	12.7921	16.1117	23.4892	8.00573	15.8417	19.8737	13.1482	1.11784
Tnrc6a	1432.2	-0.546268	0.178286	-3.064	0.00218399	0.0206653	1233.38	991.13	1457.74	1997.42	1586.14	785.503	1554.81	1120.89	2094.95	1617.22	1616.06	1152.83	1535.85	1676.02	1351.64	1143.55
B4galt4	296.339	3.5685	1.16484	3.0635	0.00218764	0.0206657	2729.86	255.481	125.599	37.7321	28.6826	93.4299	23.1307	11.8179	68.779	479.297	265.353	96.7322	172.615	95.4081	118.152	139.365
Capg	9227.99	1.67067	0.545363	3.0634	0.00218837	0.0206657	16106.2	10690.8	10090.2	1601.98	2742.55	9920.64	7272.41	15718.4	3131.89	9443.8	9522.16	15985.4	10672.3	5581.6	7563.15	11604.4
Wdr89	391.778	0.577134	0.188379	3.06368	0.00218629	0.0206657	341.741	574.175	359.165	288.997	307.066	619.566	289.267	441.892	290.889	373.177	292.124	503.074	269.223	320.192	408.039	589.869
Tshz1	1764.23	-0.861415	0.281221	-3.06313	0.00219038	0.020671	1148.99	1275.27	1223.37	2020.61	2052.19	1305.27	2219.24	1069.95	3180.83	1758.77	2088.87	1378.15	2461.52	1986.72	2208.24	849.616
Spink4	2659.47	2.66721	0.870923	3.06251	0.00219493	0.0207002	16308.8	1860.79	1893.85	765.74	1158.15	1521.93	2269.19	541.771	5118.55	647.762	1507.5	1037.98	892.051	2476.54	1940.42	2610.53
Zfp74	204.342	-1.04194	0.34031	-3.06173	0.00220059	0.0207399	123.626	120.334	219.551	324.842	226.513	89.7499	281.662	107.788	276.299	150.384	306.875	170.982	272.952	279.58	161.844	156.493
Eef1d	3845.3	0.45733	0.149556	3.05793	0.00222873	0.020984	3970.2	4477.36	3661.9	3232.34	3525.33	4431.04	3419.76	5792.08	2929.89	3514.68	2898.7	4286.44	3480.83	3445.34	3967.22	4491.72
Emc9	154.207	0.98084	0.320765	3.05781	0.0022296	0.020984	129.43	157.475	142.039	113.812	99.1794	165.499	174.025	217.877	248.801	171.142	116.811	246.008	88.5484	113.894	111.867	170.91
Igfbp4	3834.79	-5.05967	1.65487	-3.05744	0.00223238	0.020984	276.245	1308.49	477.455	7066.81	9615.84	4043.17	100.456	4.86009	100.434	7379.75	2965.98	221.786	74.2201	8940.17	2597.49	16183.4
Wdr13	1095.56	-0.694565	0.227168	-3.05749	0.00223198	0.020984	989.309	741.618	843.835	1459.79	1384.35	1014.21	1282.51	685.468	1433.67	1671.22	1174.48	881.385	1286.08	1085.38	943.652	652.005
Aunip	129.022	1.34617	0.440385	3.05681	0.00223705	0.0210142	129.331	261.658	202.384	89.6332	42.5438	121.267	74.2111	218.377	61.9925	79.5518	120.969	154.396	65.743	127.523	111.322	203.447
Rps5	18827	0.564779	0.184823	3.05578	0.00224475	0.0210726	17432.1	23537.4	17529.7	14456.6	16345.7	29953.3	18127.5	26513.3	14293.9	17331.1	12321.6	22499.2	14122.7	15915.9	17989.8	22863
Lrp12	205.148	-1.46434	0.479309	-3.05511	0.00224978	0.0211059	76.0125	225.839	107.869	330.508	314.669	227.323	85.8021	184.258	101.035	391.28	174.524	101.051	356.941	207.025	191.714	206.515
Morn5	6.16825	-4.60744	1.5085	-3.05432	0.00225573	0.0211478	1.57721	1.13272	0	25.484	23.1216	4.36998	2.71504	0.853037	4.92004	1.00698	1.17446	0	7.12876	10.7649	4.38275	10.0605
Spag5	893.474	1.40876	0.461486	3.05266	0.00226822	0.021251	567.465	1572.07	1576.74	430.361	205.072	1053.1	581.68	1567.13	578.535	722.687	679.195	1292.02	655.367	997.668	709.13	1107.36
D17Wsu104e	2235.99	0.633995	0.207899	3.04953	0.00229196	0.0214549	3726	2366.3	2216.62	1674.91	2026.2	3084.53	2080.93	2298.23	1956.21	2139.74	1525.59	2492.17	1783.21	1843.91	2139.74	2421.54
Slc7a9	233.557	3.60992	1.18389	3.0492	0.00229449	0.0214549	2461.28	55.8592	164.71	73.9648	16.5594	32.9443	53.8635	7.47087	127.037	35.2765	270.571	79.0693	118.181	167.799	42.9528	29.37
Slc9a2	1414.73	2.60155	0.853135	3.0494	0.002293	0.0214549	6499.68	1814.7	1431.99	171.352	561.61	1953.48	1257.2	736.168	404.31	132.24	2192.9	2609.57	888.889	469.491	666.891	845.196
Ppp1r18	1406.02	1.19233	0.391155	3.04824	0.00230186	0.0215096	1328.76	1333.98	1766.5	758.031	803.166	624.734	1534.35	2604.18	1291.09	1060.64	2403.66	1440.01	791.111	1338.69	1558.25	1859.16
Prkca	3772.13	0.884614	0.290335	3.04687	0.00231236	0.0215936	6777.24	2935.47	3956.78	2315.7	2205.86	4346.73	3950.48	2889.38	4388.97	3506.79	3933.52	5269.46	3563.82	3740.52	3536.13	3037.22
Bmi1	495.99	-1.19349	0.391853	-3.04576	0.00232094	0.0216596	383.032	420.598	295.349	798.069	543.98	332.581	413.609	213.393	603.162	1000.79	409.856	362.602	846.78	607.27	501.38	203.388
Dock5	3121.36	0.644415	0.211597	3.04549	0.00232301	0.0216603	4230.08	2939.41	3027.17	2164.38	2138.29	4009.45	2948.53	2721.19	3147.84	3394.54	3690.15	4244.18	2856.26	3028.26	2349.15	3052.82
Lrrc29	15.5042	6.8495	2.24916	3.04536	0.00232405	0.0216603	0	28.318	27.6846	0	0	0	33.4855	6.82429	47.2324	3.02095	14.0935	48.0344	0	2.48422	0	36.8887
Nrm	226.867	0.867631	0.284987	3.04446	0.00233096	0.0216964	191.505	366.761	256.866	172.093	139.128	265.302	160.107	237.728	248.914	244.537	189.305	360.676	121.88	184.332	230.6	260.146
Rragd	109.866	-2.80983	0.922873	-3.04465	0.00232952	0.0216964	46.2138	133.112	69.9817	388.203	311.773	52.4255	132.687	12.5015	57.7076	8.20729	260.578	47.6361	41.5451	80.2392	65.8854	49.1671
Zfp882	29.3738	-3.37429	1.10851	-3.04397	0.00233476	0.0217175	6.27681	38.4732	21.9287	59.6872	31.4084	14.86	51.2304	1.69741	33.9715	124.977	0	4.55147	35.9471	18.4285	19.8712	6.67297
Cebpz	596.004	-0.664166	0.218221	-3.04355	0.00233802	0.0217337	373.799	747.595	706.435	798.79	640.007	505.825	678.76	583.477	559.901	485.366	628.336	394.568	710.5	556.465	591.671	574.569
Ankrd17	3050.52	-0.545	0.179097	-3.04304	0.00234198	0.0217563	2470.25	2913.39	2785.06	4066.49	3196.96	2902.77	3784.02	2243.79	3477.05	3762.73	2619.74	2477.54	3227.41	3116.71	3412.06	2352.27
Mmab	790.427	0.710842	0.233643	3.04243	0.00234679	0.0217868	851.145	1052.74	812.514	470.583	494.441	1177.53	616.109	941.335	641.426	870.723	610.247	894.758	677.553	623.952	997.002	914.774
Chchd7	114.194	1.07947	0.35483	3.04221	0.00234849	0.0217885	158.791	123.01	143.559	94.1308	75.7237	114.184	125.546	194.702	132.901	41.6708	101.131	135.229	61.6842	105.721	111.106	108.018
Rpl18	5722.2	0.613414	0.201653	3.04193	0.0023507	0.0217947	6088.04	8759.32	4860.08	3941.23	3617.15	8511.62	4827.34	5716.2	5540.95	6661.2	3801.73	7112.52	4805.58	4698.48	5469.67	7144.11
Krt19	119847	0.604165	0.198709	3.04044	0.00236232	0.0218882	210628	135406	118545	103623	115974	142648	103146	135089	93151.2	70418.6	110827	145609	103620	105730	102538	120600
Zmat1	34.8003	-1.36692	0.449621	-3.04016	0.00236454	0.0218946	10.9949	19.6237	25.3963	65.5876	55.0766	27.8957	41.8668	20.8802	39.8812	24.0278	53.4626	28.5032	38.3336	46.1014	31.811	27.3618
Dhrs3	2809.93	-0.829677	0.273033	-3.03874	0.00237567	0.0219834	1201.29	2760.82	3137.62	2410.48	4372.13	2886.33	3551.88	2100.71	3968.12	3590.45	3318.11	1901.94	2472.56	2508	2416.19	2362.19
Scarf2	38.5291	-5.1671	1.70072	-3.03819	0.00238006	0.0220098	6.30885	0	30.5485	61.513	146.129	63.3646	68.781	0	7.87207	115.803	8.22122	0	0.792084	38.0913	13.1482	55.8919
Fxyd5	66.415	1.88692	0.621137	3.03785	0.0023827	0.02202	19.6919	112.245	77.4606	17.178	27.5303	109.978	42.4654	149.911	18.6532	43.5544	75.3542	63.6972	19.0063	65.3802	79.543	140.991
Klhl1	61.9144	2.89179	0.951992	3.03762	0.00238455	0.0220228	9.46327	141.59	71.5981	2.63627	13.873	33.8673	26.2454	164.636	8.85608	90.6286	30.536	94.9251	19.8021	81.1511	74.5067	126.316
Rsl1	196.2	-0.973015	0.320381	-3.03706	0.00238902	0.0220355	107.25	99.6793	203.339	360.29	245.089	69.9196	207.248	156.959	283.394	138.964	310.057	171.551	253.467	224.408	190.211	117.373
Usp8	2540.51	-0.278339	0.091643	-3.03721	0.00238777	0.0220355	2348.21	2310.84	2349.48	2973.74	2859.04	2411.16	2527.34	2236.65	2856.63	2829.73	2626.21	2388.35	2622.62	2635.98	2578.98	2093.24
Havcr2	13.9737	4.26191	1.40406	3.03542	0.00240204	0.0221413	8.09842	2.15118	10.8779	0	3.79908	5.60957	11.1718	24.5282	0	11.3751	42.213	54.0375	0.813414	12.7556	6.30107	29.8475
Appl2	2790.39	1.36723	0.450482	3.03504	0.00240502	0.0221545	5311.99	2435.79	1608.57	1333.02	1908.03	6239.47	3049.45	2816.84	3030.4	2951.09	1067.29	3678.18	1335.31	2260.37	3140.22	2480.24
1500009C09Rik	7.7059	-3.76452	1.24082	-3.03389	0.00241419	0.0222103	0	4.53187	0.954851	14.9421	50.7117	15.2983	1.81042	3.41289	2.95267	6.04323	3.52415	1.14393	3.16903	3.31302	7.01393	4.47233
Spire2	689.885	1.14352	0.376907	3.03397	0.00241362	0.0222103	1798.02	860.867	745.575	446.409	458.733	690.456	515.858	560.445	475.276	685.756	844.437	707.936	480.795	605.321	455.806	706.474
Ankrd23	79.647	-1.00579	0.331586	-3.03327	0.00241916	0.0222273	53.2722	79.168	100.326	82.763	81.4775	83.3382	52.6863	34.8578	86.2799	113.488	129.431	49.3841	107.615	96.7987	63.621	59.8456
Thap1	257.252	0.798934	0.263373	3.03347	0.00241762	0.0222273	433.454	212.534	289.811	139.624	212.824	306.815	290.078	255.107	257.929	185.278	196.661	343.536	236.617	245.518	275.7	234.552
Xpnpep2	238.18	3.649	1.20315	3.03288	0.00242232	0.022242	2266.22	10.4851	194.739	49.3658	10.025	25.8272	67.1875	95.145	74.8022	44.3362	555.576	44.1948	132.747	149.674	26.5433	64.0187
2810474O19Rik	785.018	-0.862489	0.284426	-3.03238	0.00242633	0.0222502	598.356	381.788	842.938	1127.59	556.619	452.95	714.318	470.448	1000.25	1548.92	1251.49	477.115	1121.86	944.011	597.374	474.247
Zfp746	433.436	-1.44197	0.475516	-3.03243	0.00242594	0.0222502	135.64	576.554	458.228	388.411	849.026	556.079	372.866	150.134	518.573	733.085	193.786	292.781	335.844	322.12	576.769	475.081
Polr2d	643.532	0.497172	0.164017	3.03123	0.00243559	0.0223064	744.444	695.49	671.113	607.221	624.284	648.941	668.805	921.28	506.764	561.897	479.18	760.545	491.092	504.296	652.153	759.012
Prdx4	983.917	0.787095	0.259649	3.03138	0.00243436	0.0223064	969.987	1369.56	1381.34	419.986	601.966	1398.46	803.683	1175.47	882.758	841.033	711.828	1017.56	811.267	812.96	976.614	1568.19
Pus3	202.501	-0.640106	0.211333	-3.02889	0.00245452	0.0224654	141.647	225.448	201.356	290.516	237.735	151.024	186.673	175.107	202.75	200.805	201.285	167.977	230.827	205.566	264.112	157.197
1700008O03Rik	5.52483	-3.12064	1.03075	-3.02755	0.00246543	0.0225507	0	4.18534	7.2665	12.8439	10.4835	6.41607	2.97117	2.10128	4.32469	0	1.86938	1.71016	14.4332	11.574	5.12562	3.09243
Srfbp1	221.295	0.425313	0.140545	3.02617	0.0024767	0.0226248	290.207	232.207	206.203	224.962	183.123	260.014	208.153	266.147	179.09	187.299	180.867	249.321	190.1	207.846	227.026	248.16
Zfp551	59.6548	-1.1405	0.376866	-3.02627	0.00247593	0.0226248	52.6546	25.9691	63.6982	74.1558	71.2761	41.8082	58.7052	18.4148	86.7362	71.1431	90.7593	32.5446	63.7328	69.8786	74.8654	58.1343
Ywhag	9691.19	0.515754	0.170451	3.02581	0.00247965	0.0226373	9184.87	10438.7	9994.08	8035.12	7886.54	10364.9	9443.1	11737.7	6881.35	7600.57	9582.39	12435.1	7413.07	9644.06	10619.3	13798.1
Gm14443	65.1342	-1.20597	0.3987	-3.02475	0.00248839	0.0227026	32.9791	38.347	37.0711	92.748	62.6206	18.4926	57.672	37.3723	123.86	122.324	80.6896	50.1055	123.034	51.1199	68.0771	45.6345
Sqle	6251.95	1.02093	0.337625	3.02386	0.00249574	0.0227551	10833.5	6207.56	7339.43	3839.17	2355.29	7756.95	6046.03	7013.84	4520.93	8167.73	4374.62	6599.79	5851.2	5439.06	7378.83	6307.26
Pnck	7.00712	-6.91873	2.28866	-3.02305	0.0025024	0.0228012	0	10.8477	0	0.838302	52.0549	18.8324	0	0	0	3.71327	0	0	24.2012	0.789951	0.836195	0
Gdf15	49.0791	4.37615	1.44793	3.02234	0.00250829	0.0228294	102.217	48.1754	80.2365	4.44931	10.3021	273.256	21.0783	4.31908	6.9751	2.03942	13.0823	198.04	0	13.4166	0.887625	6.79178
Palld	1938.32	-1.34147	0.443857	-3.02229	0.00250869	0.0228294	1835.41	1505.05	1942.79	3117.18	2517.3	1746.58	1407.99	445.671	2807.16	2918.21	1877.12	639.317	1757.78	3049.34	1870.86	1575.38
Pkmyt1	361.268	1.07251	0.354953	3.02155	0.00251482	0.0228706	337.523	431.566	503.096	190.69	176.649	560.449	221.728	579.212	205.658	393.731	240.764	482.631	298.616	299.762	301.533	556.684
Usp7	3521.13	-0.379635	0.125658	-3.02117	0.00251799	0.0228848	3152.3	3634.95	3281.39	4239.99	4094.89	3916.34	3367.93	2923.23	3387.35	4141.82	3370.08	3268.98	3819.88	3409.37	3344.81	2984.74
Phf13	1266.51	0.770659	0.255105	3.02094	0.00251988	0.0228874	1760.17	1029.64	1338.41	1045.72	1068.22	1340.49	1324.94	1612.24	1159.16	769.336	1699.44	1494.78	739.015	1265.29	1241.19	1376.06
Eif2ak4	499.651	-0.649825	0.215163	-3.02015	0.00252652	0.0229332	318.38	446.404	515.936	672.897	536.142	630.156	422.183	399.542	432.871	626.341	418.293	451.702	629.169	518.141	488.413	487.845
Mga	1251.62	-0.970075	0.32129	-3.01931	0.00253348	0.0229817	765.718	1447.96	953.843	2166.82	1537.5	1078.02	1492.19	529.592	1331.25	1577.42	1475.93	1214.22	1206.04	1336.03	900.829	1012.57
Foxred1	673.502	0.60029	0.198873	3.01845	0.00254071	0.0230226	859.439	647.22	563.861	599.98	472.718	911.142	680.279	895.619	466.006	570.736	503.164	860.174	652.624	618.205	825.138	649.735
Rap1gap2	1613.84	1.48332	0.491427	3.01839	0.00254121	0.0230226	5964.27	929.362	1205.63	781.256	1044.67	1851.46	1581.07	1149.53	1710.19	1255.65	1869.94	1548.09	1270.72	1279.2	956.665	1423.7
Cast	771.701	1.46853	0.486626	3.01779	0.00254629	0.0230468	2359.51	404.381	1236.26	570.313	530.873	704.659	587.354	1297.47	670.11	428.975	221.973	665.62	460.201	1082.29	497.88	629.343
Sri	4703.93	1.03813	0.344016	3.01769	0.00254712	0.0230468	12103.9	5515.07	4540.2	2681.23	3535.13	4027.09	5148.7	3959.44	3725.69	3107.28	3756.13	5720.34	4389.1	3728.73	5307.72	4017.06
Dynlt1c	130.709	-0.703916	0.233369	-3.01633	0.00255856	0.0230971	122.639	126.241	86.3787	160.666	173.249	83.2753	91.1964	109.507	158.979	159.29	171.602	100.029	205.716	129.401	122.058	91.1112
Fam214b	1205.6	1.02483	0.339768	3.01626	0.00255915	0.0230971	2772.32	930.217	956.167	848.204	993.315	1542.42	1221.45	1206.48	1318.77	760.024	1345.01	1247.32	725.325	1164.11	914.203	1344.32
Map9	99.437	-1.23434	0.409227	-3.01628	0.00255895	0.0230971	70.2763	78.5104	108.209	189.804	68.2743	61.3655	108.238	71.5675	90.4599	80.7146	135.222	50.9592	195.826	143.487	71.9754	66.1031
P2rx5	12.1542	-4.36061	1.44551	-3.01665	0.00255582	0.0230971	0	20.0636	0.844118	35.7429	32.7116	10.6261	6.40189	0.754276	19.6082	0	24.9237	2.75869	2.80152	3.99482	8.52573	24.7105
Mylip	16.9291	-3.10192	1.02886	-3.0149	0.0025706	0.0231858	6.30885	0	7.63714	72.0581	44.3935	8.73995	4.52507	10.2364	27.5522	26.1816	3.52338	0	27.7229	13.2492	13.1482	5.58919
Mthfr	1092.39	1.04826	0.347738	3.01452	0.0025739	0.0232009	1652.39	1018.23	1305.54	855.901	812.243	1729.76	790.809	1028.07	1233.86	578.958	616.884	2062	624.468	881.299	1038.75	1249.05
Cldn15	37.1677	4.63219	1.53717	3.01345	0.00258291	0.0232674	541.44	0.86126	2.83979	16.704	2.75122	0	4.12874	3.24302	8.78145	1.48456	0	3.47836	2.40903	0.629622	2.60749	3.32526
Zbtb7b	3197.52	0.953484	0.316478	3.0128	0.0025885	0.023303	6576.68	2684.76	2814.03	2408.54	2093.17	4676.69	2985.09	3098.03	2556.07	1716.55	3673.16	4393.3	2761.11	2473.86	2576.32	3672.95
Chst7	99.3213	1.89543	0.629275	3.01209	0.00259457	0.0233188	37.8531	138.192	130.786	18.4539	38.8443	67.7346	95.9314	196.198	40.3444	202.404	86.91	148.678	45.9409	81.9792	143.754	115.137
Erlin1	582.506	0.614803	0.204116	3.01202	0.00259516	0.0233188	919.771	645.683	484.367	445.367	505.32	690.732	396.48	588.721	531.297	538.215	763.373	717.763	499.825	468.115	534.729	590.341
Prkaca	3040.64	0.378526	0.125663	3.01224	0.00259332	0.0233188	3537.69	3542.01	2936.48	2264.56	2647.89	3218.49	2844.46	3331.96	2832.96	3532.5	2836.32	3135.96	2781.8	2647.35	3044.25	3515.6
Arl6ip1	7229.84	0.441124	0.146482	3.01146	0.00259995	0.0233472	8430.2	8525.98	8788.43	5556.38	5993.13	6786.57	7098.93	8764.1	7356.45	7100.25	6495.94	6518.96	5916.87	7280.41	7188.58	7876.29
Tbl1xr1	1796.47	-0.513897	0.170668	-3.01109	0.00260311	0.0233609	1565.09	1760.53	1616.75	2303.08	2380.34	1606.3	2034.1	1650.55	1831.36	1596.69	1628.43	1451.47	1982.94	2325.23	1721.45	1289.21
Zmym2	820.127	-0.715215	0.237632	-3.00976	0.00261456	0.0234489	578.837	599.209	661.567	1187.2	904.518	653.311	946.644	475.994	1225.09	1056.33	813.901	785.706	928.323	962.22	830.092	513.088
Tyms	769.782	1.0432	0.346708	3.00889	0.00262208	0.0235015	789.133	1138.29	1200.61	396.705	373.98	729.994	467.047	1184.37	573.744	428.612	700.227	904.843	626.685	843.059	1040.04	919.168
mt-Nd2	33497	-0.805097	0.267681	-3.00767	0.00263258	0.023566	34690.8	26676.7	27279.8	59575.3	41465.4	28027.9	31970.5	21709.8	49288	30459.3	38948.6	22833.5	37395.9	37012.4	30252.3	18366.1
Zc4h2	336.566	-1.05486	0.350722	-3.00767	0.00263257	0.023566	113.123	267.424	343.873	564.674	446.837	162.156	329.963	323.509	397.585	288.471	391.784	231.92	385.395	436.963	372.849	328.532
Cds1	277.116	2.57729	0.857193	3.00666	0.00264135	0.0236195	2432.44	144.312	89.6176	76.6015	192.249	117.21	200.26	108.679	40.3507	81.0269	139.524	237.733	196.516	55.5256	246.86	74.9556
Pcdhb18	17.1809	-3.2129	1.06861	-3.0066	0.00264187	0.0236195	3.15442	3.39816	6.68249	29.8777	63.8157	1.09249	11.7652	8.53037	23.6162	3.02095	16.4424	1.14368	29.3071	19.0457	27.173	26.8281
Rhoj	17.9752	-3.1393	1.04463	-3.00518	0.00265425	0.0237154	0	30.2137	3.17707	11.1338	55.0839	36.426	8.98359	1.70652	45.9324	34.9853	17.4874	6.1012	8.4511	0.552193	8.76778	18.6009
Dusp4	2181.61	1.39361	0.463786	3.00486	0.00265703	0.0237254	1816.95	1661.7	1515.02	706.521	1403.95	5086.65	2028.14	2562.52	1325.46	3059.22	1848.6	4456.91	1253.08	946.487	1361.28	3873.31
Ankrd46	1064.73	-0.494708	0.164771	-3.0024	0.0026786	0.0238952	809.11	1098.74	931.731	1444.68	1396.55	817.185	1010.9	1052.65	1135.55	1235.57	1053.49	912.654	1075.65	1025.98	1069.39	965.812
Idi1	4331.19	1.23294	0.410681	3.00218	0.00268058	0.0238952	8509.37	5094.83	5923.37	2513.93	1085.28	4208.65	3629.32	5308.03	3476.03	5166.63	3272.1	4703.17	4279	4363.69	4651.24	3114.44
Krt83	130.883	-1.01852	0.339326	-3.00159	0.00268576	0.0238952	107.25	215.217	111.693	182.781	146.129	100.509	123.987	79.3324	100.369	163.131	155.029	58.3275	163.961	151.537	92.9142	141.965
Lztfl1	287.258	-0.577494	0.192381	-3.00182	0.00268367	0.0238952	276.498	232.156	303.863	292.642	340.329	263.915	277.329	215.397	278.147	355.981	365.321	182.068	361.427	341.231	277.876	231.95
Vamp3	2607.31	0.813424	0.270951	3.00211	0.00268118	0.0238952	4358.41	3184.31	3051.93	1929.87	2035.25	3532.03	2393.28	2791.33	2442.31	1227.42	2463.78	3148.32	1893.24	2331.93	2592.87	2340.68
Znrf3	296.132	-0.73235	0.243991	-3.00155	0.00268609	0.0238952	157.514	274.055	281.741	331.895	404.394	375.639	304.024	204.042	308.316	321.453	228.358	296.712	360.273	337.609	285.896	266.187
Scly	1236.96	-0.796288	0.265327	-3.00116	0.00268955	0.023911	582.139	1100.45	1236.15	1843.96	1613.54	848.316	1098.89	1274.91	987.962	1381.74	1454.76	1024.42	1554.37	1443.81	1165.97	1180.02
Smo	1159.08	-1.89622	0.63191	-3.00077	0.002693	0.0239268	64.6657	1195.02	663.476	2389.34	1907.07	865.255	918.589	994.641	715.374	2605.07	1155.67	502.074	1523.97	870.304	887.068	1287.75
Slc9a9	66.8416	-2.51718	0.838937	-3.00044	0.00269592	0.0239378	9.08774	6.52662	54.8114	69.5142	106.58	35.6779	68.6589	12.2878	54.978	304.613	23.6849	31.9494	127.795	39.7606	69.8665	53.674
Stk36	269.755	-1.19481	0.398285	-2.99988	0.00270088	0.0239669	88.7076	267.623	222.232	421.569	472.443	341.132	258.862	208.698	346.874	164.665	177.322	176.345	203.255	263.34	343.451	359.557
Eif3d	4979.19	0.457951	0.152676	2.9995	0.00270425	0.023982	4643.31	5647.74	4898.27	3962.32	4261.78	6797.5	4427.33	6259.58	3861.25	4949.33	3969.67	5982.57	4073.69	4358.15	5273.32	6301.26
Cirh1a	1273.75	0.401278	0.133812	2.99883	0.00271018	0.0240196	1313.82	1685.49	1410.01	1085.27	1051.57	1431.17	1125.84	1406.66	951.536	1260.74	1127.48	1406.72	990.105	1231.34	1318.33	1583.98
Omp	381.235	1.62509	0.541953	2.99858	0.00271237	0.0240241	1081.97	240.137	380.902	178.388	222.893	353.968	314.945	380.454	157.441	197.369	866.752	559.258	253.467	246.766	312.928	352.119
Taf2	1124.4	-0.573788	0.191379	-2.99818	0.00271596	0.024041	856.426	1208.61	1213.35	1145.02	1195.85	821.555	1085.11	713.992	1077.49	1578.95	1236.71	910.366	1348.13	1236.31	1358.65	1003.82
Ccdc80	85.7987	-4.55727	1.52058	-2.99706	0.00272599	0.0241048	0.810089	394.865	5.74237	14.4569	196.883	23.0396	93.2524	8.99486	0	5.30908	54.3639	19.9901	480.995	28.6243	41.4334	4.01902
Tmem256	681.864	0.460737	0.153733	2.997	0.00272655	0.0241048	802.269	712.073	698.054	580.837	582.824	876.495	633.536	917.503	536.981	635.415	509.402	776.929	651.99	526.462	680.383	788.675
Srrm4	9.10457	-7.4783	2.49598	-2.99614	0.00273419	0.0241574	0	0	5.86979	82.1151	31.4128	5.23526	10.8421	0	1.17885	0	7.03506	0	0	1.98407	0	0
Chmp6	1833.5	0.544969	0.181945	2.99524	0.00274233	0.0242007	2776.32	1849.01	1703.29	1341.8	1502.89	2197.47	1732.61	2096.55	1799.29	1426.65	1509.74	2287.5	2058.9	1514.59	1622	1917.31
Kif3a	1048	-0.767837	0.256354	-2.99522	0.00274249	0.0242007	627.771	1013.05	1007.18	1664.26	1514.88	897.931	970.531	864.884	1178.34	818.614	949.765	891.103	884.505	1411.42	1177.55	896.243
Cebpg	1267.3	0.828767	0.276752	2.99462	0.00274787	0.0242332	1964.33	977.237	1144.7	970.705	851.017	1971.86	1283.09	1715.01	1001.77	1149.36	644.995	1840.63	1285.43	978.413	1167.8	1330.37
Acaa1b	146.419	-2.20797	0.737407	-2.99423	0.00275135	0.0242489	50.6228	95.8481	77.0656	83.7601	563.961	247.581	161.963	73.8414	258.272	53.292	58.2573	50.0562	160.299	178.798	168.207	60.8848
Gm7488	376.995	0.742214	0.247932	2.99362	0.00275686	0.0242825	258.663	415.708	404.768	288.232	247.864	446.83	300.464	530.589	386.715	354.458	364.083	518.085	248.714	375.117	440.028	451.607
Rad9a	433.795	0.645877	0.215816	2.99272	0.00276505	0.0243396	424.27	451.955	446.772	420.046	374.57	467.587	420.831	737.877	271.586	352.444	375.827	559.258	309.705	390.85	400.583	536.562
Col7a1	1125.11	2.72087	0.909575	2.99137	0.0027773	0.0244023	56.2259	1219.22	1092.47	170.588	390.722	293.787	1022.25	3803.5	435.043	479.47	1433.03	1700.67	282.16	1117.01	1140.56	3365.05
Copg1	7400.85	0.391224	0.130777	2.99153	0.00277579	0.0244023	9625.26	8772.99	7063.09	6810.4	6049.85	8723.72	7183.7	8086.97	7020.67	7319.37	6085.41	6966.01	5952.71	6851.44	6538.67	9363.33
Nebl	31.1534	-3.97432	1.32851	-2.99157	0.00277547	0.0244023	8.4982	27.8284	9.71592	118.543	49.001	26.7308	44.4597	0	1.17821	128.9	6.32813	4.79287	42.2998	3.966	21.5277	4.68459
Dlgap5	965.086	1.16499	0.389518	2.99084	0.00278209	0.0244143	902.647	1599.61	1464.25	448.123	260.98	1139.78	505.045	1218.53	1138.57	962.322	955.542	1106.47	729.792	1005.79	1030.18	973.748
Plch1	1597.01	-0.582334	0.194695	-2.99101	0.0027806	0.0244143	1052.32	1668.31	1834.39	1345.45	1681.29	1351.79	1894.39	1046.89	1902.54	1681.02	1760.69	1326.05	2101.4	1848.85	1961.9	1094.88
Ocrl	1088.23	-0.404748	0.135382	-2.98967	0.00279275	0.0244928	767.328	1110.57	1117.48	1237.07	1164.05	1089.39	1005.94	925.83	1173.61	1112.08	1132.06	1106.73	1311.7	1098.62	1096.48	962.781
Atoh1	463.678	5.5499	1.8565	2.98944	0.00279488	0.0244964	5493.43	1.13272	279.71	75.5731	2.7746	1.09249	118.557	17.0607	227.306	13.0908	758.701	53.7528	40.3963	148.225	31.5558	156.497
Slc15a2	17.154	4.43108	1.48237	2.98918	0.00279731	0.0245026	41.4851	4.22485	1.12827	2.49768	1.04988	30.1314	2.45978	30.3101	0	0	0	41.1915	1.61336	85.7956	3.26938	29.3075
Gm5641	2154.38	1.15056	0.385022	2.98831	0.00280528	0.0245489	1873.73	2305.08	2630.04	763.64	1773.89	2276.76	1477.89	4740.32	2166.79	2671.53	1527.97	2585.85	1607.93	1518.69	2228.19	2321.75
Zbtb7c	941.602	-1.80985	0.60566	-2.98823	0.00280603	0.0245489	87.2448	953.302	667.852	2227.38	1537.98	557.519	1685.02	599.945	1185.56	615.5	1258.3	726.055	1193.11	556.927	781.486	432.444
Pdgfa	1606.86	1.49143	0.499211	2.98758	0.002812	0.024586	1766.46	1068.73	1358.52	1090.41	795.785	719.768	1321.7	4042.77	741.397	1520.83	4057.75	2012.12	896.536	1304.02	1287.67	1725.34
Pfas	495.681	0.543707	0.18203	2.98691	0.00281811	0.0246243	505.658	580.483	578.823	395.918	419.29	635.332	441.086	701.974	328.779	408.723	369.27	545.657	391.093	436.813	602.39	589.603
Cystm1	10006.8	1.20869	0.404753	2.98623	0.00282436	0.0246639	31085.7	9181.05	10128.7	5417.97	6832.98	9715.43	7942.79	9512.89	7436.68	5993.79	11682.8	10516.2	9862.39	8718.5	8121.16	7960.22
Lime1	111.037	-0.96739	0.324133	-2.98455	0.00284	0.0247853	69.9583	66.8917	85.0721	189.884	131.43	122.025	115.718	96.447	151.65	164.335	148.951	73.385	151.362	89.2206	56.2021	64.0548
Syne3	68.6411	2.4588	0.824344	2.98273	0.00285688	0.0249174	76.5104	34.3627	56.8187	6.54784	7.00724	96.1385	23.5328	177.023	14.6642	68.2342	69.738	163.965	61.9712	37.2995	67.8647	136.579
Snrnp48	317.667	0.741174	0.248623	2.98112	0.00287195	0.0250182	325.114	327.096	340.229	246.917	219.681	453.322	310.794	329.122	384.656	285.247	211.498	485.292	214.857	300.987	336.333	311.53
Tiam2	344.34	1.21102	0.406208	2.98128	0.00287042	0.0250182	458.014	199.443	392.314	191.833	161.916	246.148	359.736	420.564	224.952	206.391	586.126	496.207	239.811	458.945	371.878	495.162
Maf	520.672	2.24623	0.753539	2.98091	0.00287394	0.0250203	1617.72	133.615	547.009	173.616	58.608	81.0279	420.29	486.221	615.443	703.523	900.34	383.739	291.625	682.519	368.576	866.884
Bard1	236.924	1.32936	0.446095	2.98	0.00288253	0.0250462	149.835	376.063	320.76	91.3907	86.9373	319.008	144.802	414.576	113.161	296.053	247.811	296.212	164.754	269.952	220.014	279.46
D13Ertd608e	16.8545	5.37505	1.80392	2.97966	0.0028857	0.0250462	9.00786	21.5642	2.7261	0	2.64107	1.03992	12.0605	28.4195	53.3893	1.91705	0	71.1198	0	3.94111	56.5255	5.32022
Kmt2a	2273.99	-0.734063	0.246344	-2.97983	0.00288407	0.0250462	1983.41	1633.92	2054.98	2907.67	2805.03	2007.77	2496.67	1062.04	2402.08	2368.78	2894.02	1954.29	2594.4	3191.4	2067.97	1959.41
Ppapdc1b	826.609	0.974032	0.326827	2.98027	0.00287995	0.0250462	1549.4	1070.56	759.64	418.835	553.994	1563.23	599.978	687.73	803.147	657.739	665.041	1021.62	684.363	801.381	666.321	722.761
Rab32	2134.63	-0.706817	0.237191	-2.97995	0.00288298	0.0250462	1419.49	1716.07	2269.18	2686.36	2732.98	1363.43	2814.59	1967.1	2552.52	1351.37	2327.78	1861.91	3151.7	2179.49	2047.62	1712.53
Ttc21b	754.238	-0.624218	0.209524	-2.97922	0.00288987	0.0250672	408.168	737.851	857.289	951.665	856.725	774.73	678.544	630.955	817.536	817.282	566.739	660.304	818.747	783.555	802.549	905.163
Nfya	1030.18	-0.576532	0.193534	-2.97897	0.00289216	0.0250719	653.743	880.015	921.109	1303.85	1050.39	1150.62	1112.84	844.829	905.28	1353.97	1073.08	853.519	1159.05	1182.19	969.621	1068.84
Gm20441	16.1892	2.82504	0.948884	2.97722	0.00290874	0.0251969	34.6987	28.318	9.54642	0	3.69946	28.4048	8.14512	20.4729	11.8081	11.0768	4.69784	5.71838	4.75251	4.14036	25.4199	58.1276
Zfp157	188.256	-0.838884	0.281781	-2.97708	0.00291012	0.0251969	113.148	164.3	190.014	310.587	194.354	94.5971	233.645	114.646	229.856	263.61	207.696	169.768	204.364	169.791	220.126	131.601
Dis3	237.954	-0.636413	0.213806	-2.97659	0.00291476	0.0252218	152.99	244.667	244.388	318.989	215.494	185.724	247.069	179.991	297.171	369.563	257.207	184.132	271.685	236.001	232.286	169.911
Slc34a2	415.431	-2.51603	0.845334	-2.97638	0.00291676	0.0252237	8.08932	317.343	340.503	288.877	1420.64	370.666	606.044	228.251	953.169	329.867	195.565	107.539	262.655	663.717	406.739	147.232
Mreg	25.1402	-1.87277	0.629534	-2.97485	0.00293131	0.0253342	6.30885	19.2562	44.8682	32.514	44.3935	13.1099	15.3852	10.2364	23.6162	70.4889	22.3147	13.7241	35.6438	23.186	14.9013	12.2962
Ecm1	17224.4	1.74913	0.588032	2.97455	0.00293418	0.0253437	8331.6	14777.8	23977.8	3129.87	7522.02	12440.5	20284.8	34465	19953.8	6201.42	38997.8	17401.4	7256.21	18326.6	14527.6	27995.8
Neu2	61.0436	-1.38293	0.464999	-2.97405	0.00293893	0.0253694	25.962	48.7832	36.0159	134.848	54.7217	58.7635	61.1329	36.7068	117.296	66.1277	47.6294	29.733	55.3864	66.811	67.3336	69.4467
Wbscr17	14.0299	-5.40336	1.81757	-2.97284	0.00295057	0.0254544	0.974922	7.00168	5.95454	2.82293	17.8427	0.675303	26.2758	0	18.9841	2.48979	42.4737	0	25.4173	65.8374	0.541821	7.18683
Rft1	383.008	-0.872407	0.29353	-2.97212	0.00295748	0.0254987	263.394	492.733	415.269	347.109	435.612	375.818	572.874	301.122	280.442	367.549	320.628	136.097	500.597	355.243	527.683	435.957
Zfp39	44.5123	-0.907277	0.305287	-2.97188	0.00295983	0.0255035	22.081	36.247	50.596	50.9679	52.7173	31.6823	41.6306	29.0032	45.2644	51.3562	51.6762	36.5976	62.5747	59.6212	62.235	27.946
Cald1	3858.12	-1.72035	0.578973	-2.97139	0.00296457	0.0255289	714.235	2000.89	3317	7857.35	5673.8	1105.99	3516.05	2558.4	1695.31	6569.12	7963.03	2411.61	5215.3	5847.92	1975.9	3308.03
Mcm10	545.886	1.2916	0.434762	2.97081	0.00297013	0.0255614	783.852	798.788	889.111	240.597	100.629	518.423	488.054	686.308	399.522	545.606	486.136	514.134	468.95	621.68	467.382	724.995
Arf1	18374.5	0.401454	0.135206	2.96921	0.00298562	0.0256792	26357.4	19609.2	19045.9	15765.1	17160.5	20588.2	18094.2	19009.4	15881.3	14507.7	17134.9	19412.3	16111.2	16545.8	18110.5	20657.5
Arhgef37	92.1143	1.16601	0.392737	2.96892	0.00298847	0.0256882	200.306	83.8212	109.784	59.7555	43.4687	49.1622	115.842	98.0992	115.129	55.3841	103.352	82.3447	64.9509	102.681	102.556	87.1914
Ift57	598.297	-1.07207	0.361146	-2.96853	0.00299227	0.0257054	239.746	365.528	582.859	1159.7	994.733	435.86	518.592	620.949	749.467	612.234	678.469	391.678	485.916	718.092	472.921	546.004
Galnt3	4250.34	0.504223	0.169894	2.96787	0.00299875	0.0257174	6070.12	3807.79	4147.43	3429.94	3523.03	4464.86	4143.05	4715.26	3824.99	4090.38	5435.83	4559.35	3862.34	4548.75	3841.94	3540.36
Hmga2	633.29	2.88814	0.973117	2.96793	0.00299815	0.0257174	799.258	269.831	238.483	70.3641	28.6967	3263.27	218.521	740.07	80.7616	635.53	35.3885	1761.16	346.542	246.989	483.247	914.531
Zscan26	849.608	-0.710458	0.239386	-2.96783	0.00299907	0.0257174	627.909	647.599	654.955	1384.48	943.727	845.185	827.889	606.93	1291.88	820.772	807.047	776.174	962.768	912.246	809.76	674.413
Tmem186	387.641	-0.645535	0.217554	-2.96724	0.00300487	0.0257516	276.012	444.026	298.803	471.893	560.468	422.795	347.525	318.183	378.843	477.311	251.334	372.838	483.171	353.587	349.743	395.715
Ttc28	20.4769	-4.89013	1.649	-2.96551	0.00302182	0.0258814	0	14.2354	1.6917	35.5967	58.4552	2.58131	2.67292	1.00776	4.06872	63.2763	0	2.02668	4.67878	41.6952	84.4181	11.2251
Enpep	51.1295	-4.88667	1.64862	-2.96409	0.0030358	0.0259855	16.7013	0	8.15094	355.019	64.9852	48.1175	35.2394	0	124.562	10.901	1.1861	0	74.1603	56.0874	18.0879	4.87403
Xndc1	303.772	-0.680784	0.229728	-2.96343	0.00304231	0.0260256	188.093	375.15	376.519	380.624	309.715	274.57	232.297	209.462	353.207	365.252	271.099	257.554	360.851	333.494	277.772	294.693
Ccnb1	1765.48	1.28585	0.433956	2.96309	0.00304567	0.0260388	1939.72	3033.17	2885.93	749.201	372.697	2588.54	1039.68	1969.43	1567.84	993.426	1203.34	2517.8	1513.24	1769.55	1836.06	2268.04
Gins2	1355.84	0.784849	0.264899	2.96282	0.00304835	0.026046	1179.91	2463.01	1564.54	900.429	817.68	1714.64	945.583	1796.72	954.742	1153.6	1324.84	1876.73	1098.91	1305.44	1066.67	1530
Cat	2386.79	-0.66163	0.223332	-2.96254	0.00305115	0.0260462	1683.18	2412.09	2175.23	2702.1	2755.25	2867.22	2256.01	1669.56	2641.92	2870.09	1535.93	2182.94	3299.61	2446.4	2484.88	2206.25
Sike1	850.202	0.683629	0.230765	2.96245	0.00305202	0.0260462	833.426	805.819	940.752	672.561	778.587	1157.05	725.953	1125.63	665.969	567.529	870.072	1208.8	524.634	856.617	800.678	1069.15
Dhx57	1494.13	-0.634579	0.214237	-2.96204	0.00305605	0.0260494	863.925	1556.07	1309.71	1763.89	1911.72	1330.41	1621.15	1213.71	2071.18	1554.41	1262.47	1186.05	1397.53	1630.26	1658.32	1575.36
Gm20498	334.964	1.32769	0.448224	2.96211	0.00305543	0.0260494	617.303	321.904	502.577	139.356	165.065	210.905	221.977	314.057	173.716	323.592	628.198	362.653	210.189	366.682	503.447	297.811
Chrdl1	9.45155	-6.16841	2.08275	-2.96167	0.0030598	0.0260503	0	3.87914	8.99056	9.02825	12.6693	0	13.3613	0	0	15.3604	0	0	24.1689	58.5136	5.25325	0
Stx16	2025.4	-0.916935	0.309586	-2.96181	0.0030584	0.0260503	1016.24	1788.15	1857.62	2018.05	2606.65	1707.23	2078.08	1390.1	4425.35	2058.52	1674.69	1472.9	2704.68	1681.22	2271.31	1655.67
Npepps	6598.93	0.478647	0.16164	2.96119	0.00306454	0.0260705	9058.69	6143.23	6386.98	5664.98	5248.72	8656.44	6783.2	7112.17	6486.13	5245.61	6445.73	7452.88	6035.63	6238.24	6383.52	6240.68
Zfp319	843.372	-0.48598	0.164124	-2.96106	0.00306583	0.0260705	733.403	620.73	663.476	1052.75	1108.91	769.116	956.599	796.736	822.631	1060.35	919.602	694.212	956.046	838.01	779.252	722.124
BC021767	183.606	-1.92656	0.65071	-2.96071	0.00306933	0.0260847	51.0894	49.1057	119.497	532.609	365.125	60.6606	224.695	166.918	272.693	31.7276	290.134	79.9704	237.562	272.598	110.879	72.438
Caprin1	11465.1	-0.422695	0.142782	-2.96043	0.00307208	0.0260849	8734.53	11732.6	12470.8	12935.1	12367.5	11129	10721	8450.82	10845.1	14717.1	11212.3	10490.7	11794	12256.1	12865.4	10719.6
Parpbp	161.357	1.34727	0.455108	2.96034	0.00307301	0.0260849	209.768	278.156	245.178	81.919	30.6424	213.129	100.593	226.277	129.818	100.249	178.285	179.598	128.688	170.1	133.78	175.54
Eif4g2	16348.2	-0.428914	0.14493	-2.95946	0.00308179	0.0261183	13666.7	15005.7	15576.1	19497.2	16930.7	12590.1	15533.6	14372.3	17631.4	22955.7	18566.8	14052.4	20236.9	17226.2	16792.2	10937.5
Styk1	1017.32	1.48371	0.501381	2.95925	0.00308391	0.0261183	3055.71	929.745	1105.39	449.143	418.323	998.091	723.022	618.026	875.132	1243.12	1704.07	1148.17	854.777	595.173	1007.73	551.482
Tmem47	73.5026	3.63603	1.22872	2.95921	0.00308426	0.0261183	51.572	42.9295	131.085	16.0786	16.8543	10.2079	33.1355	178.362	36.0492	2.63413	206.259	165.043	0	169.585	33.2396	83.0079
Tmem67	193.463	-0.968526	0.327242	-2.95966	0.00307975	0.0261183	149.71	177.931	222.366	334.472	289.843	168.628	208.195	119.309	257.264	108.609	190.95	130.335	155.565	198.027	230.092	154.107
Ppp1r14d	257.21	2.94272	0.994592	2.95872	0.00308923	0.0261448	2042.47	38.5322	232.946	136.277	16.6394	64.3937	158.317	35.8459	200.762	75.4958	470.714	171.59	139.42	187.978	90.3006	53.6838
Cfap69	322.084	1.19075	0.402514	2.95829	0.00309351	0.0261655	497.269	573.236	305.821	164.228	210.294	409.181	383.907	231.946	218.32	378.554	209.502	406.201	122.122	512.772	200.933	329.061
Muc2	721.716	5.92527	2.00314	2.958	0.00309645	0.0261749	9706	9.28844	205.52	144.282	6.93155	22.406	84.7235	1.81444	10.6396	10.9685	812.502	10.4876	8.82823	402.883	19.2292	90.9617
Cited1	20.8165	3.85065	1.30226	2.95691	0.00310743	0.0262366	7.91303	8.74459	14.38	1.16725	2.45699	164.434	9.61699	10.1977	0	9.3287	13.6002	51.6414	1.13863	7.14221	5.41356	25.8891
Pitrm1	1525.45	0.534175	0.180647	2.95701	0.00310637	0.0262366	1250.73	1892.77	1524.56	1169.63	1320.71	1797.15	1477.89	1902.27	1474.04	1350.37	1152.15	1986.57	1063.77	1671.05	1685.6	1687.94
Mturn	170.516	-1.86521	0.631092	-2.95553	0.00312129	0.0263225	21.5625	201.314	72.2927	277.236	408.951	65.5858	221.751	128.283	231.037	72.1567	129.105	94.5141	207.682	247.831	196.136	152.822
Mvb12b	125.318	-4.2144	1.4259	-2.9556	0.00312066	0.0263225	0	170.839	5.67663	365.096	200.395	247.375	16.8427	34.9224	0	625.652	90.7886	6.80068	197.433	0.907026	8.64112	33.7156
Ccdc181	325.99	-0.764047	0.258539	-2.95525	0.00312416	0.0263311	198.729	237.871	287.347	577.343	443.935	344.136	285.984	295.151	361.131	380.64	239.59	331.666	385.745	241.797	308.545	296.227
Cyld	536.605	-1.12987	0.382561	-2.95344	0.00314255	0.0264617	118.29	399.85	414.315	852.395	677.002	360.523	612.694	507.557	589.421	781.42	815.076	353.396	622.578	627.679	468.954	384.537
Lpar2	1001.69	-0.726778	0.246085	-2.95336	0.00314336	0.0264617	740.112	937.049	984.754	1311.72	1412.51	672.858	1231.44	743.639	1458	926.668	772.038	772.346	1010.12	1081.78	959.159	1012.92
Gmeb1	1008.81	0.684839	0.232006	2.95181	0.00315917	0.0265704	1222.68	1115.4	1127.41	733.119	809.986	1202.22	1039.52	1106.61	750.99	489.348	1074.77	1178.99	638.953	1201.55	1111.12	1338.21
Serpine1	6519.32	1.53087	0.518636	2.95173	0.00316	0.0265704	4619.71	8899.06	5073.89	1548.31	3509.8	30238.4	3409.97	6370.66	1051.92	3365.84	4313.63	7261.48	1258.83	4661.41	3995.47	14730.7
Etfdh	1857.26	-0.555765	0.188304	-2.95143	0.00316308	0.0265807	1629.68	1862.22	1911.7	2341.2	2385.8	1435.24	1980.78	1544.41	2233.18	1258.3	1885.67	1572.58	2249.44	2006.37	1997.69	1421.84
Abca8b	193.943	-2.9617	1.0036	-2.95107	0.00316677	0.026596	88.7474	73.4355	203.235	118.985	130.034	61.9208	95.3675	5.60787	442.273	185.411	19.9212	53.1612	889.421	230.328	482.463	22.7797
Mttp	193.531	-0.685071	0.232163	-2.95082	0.00316929	0.0266015	91.6393	166.523	168.175	189.678	211.603	189.496	271.99	129.941	293.555	265.533	223.848	130.607	170.736	219.781	228.869	144.519
Fip1l1	2028.93	0.538335	0.182612	2.94797	0.00319871	0.0268327	1965.29	1978.19	2115.56	1766.72	1549.75	3006.68	1902.72	2530.9	1716.47	1600.44	1356.94	2673.71	1623.67	1944.29	2330.43	2401.06
Cry1	364.779	0.909729	0.308639	2.94755	0.00320304	0.0268533	764.948	288.843	309.304	267.142	279.309	515.657	302.275	426.518	205.658	366.542	388.746	401.43	299.408	301.418	274.36	444.9
Hist1h1e	19.5388	2.25279	0.764359	2.94729	0.00320572	0.0268599	56.7796	19.2562	26.73	4.39379	1.84973	4.36998	17.1953	17.9138	21.6482	31.2165	12.9191	21.7299	13.4654	24.0141	32.4323	6.70703
Sorbs3	90.2005	-1.73643	0.58921	-2.94705	0.00320821	0.026865	45.7391	79.2904	37.231	231.113	86.0125	113.619	120.367	40.0927	163.345	115.803	36.4083	35.454	86.3372	110.134	51.7164	90.5449
Vwa8	794.156	-0.781601	0.26524	-2.94677	0.00321111	0.0268735	722.363	565.227	587.105	1021.99	1085.79	807.353	780.122	464.905	1214.27	1298	668.268	627.878	1007.53	631.819	682.832	541.034
Gm13461	862.337	0.737599	0.250414	2.94552	0.00322416	0.0269669	723.94	1090.81	1058.7	784.73	590.064	1064.09	758.401	1321.35	495.94	515.576	633.034	1308.37	639.212	750.234	1090.43	972.519
Slc25a33	307.472	1.10365	0.374868	2.94412	0.00323876	0.0270592	399.035	304.702	317.896	246.931	266.361	711.214	265.169	365.953	200.738	130.908	163.25	585.562	115.644	218.611	241.928	385.654
Tubgcp2	337.757	-1.06219	0.360787	-2.9441	0.00323899	0.0270592	99.3643	488.202	242.479	428.834	506.826	361.615	416.306	205.582	396.555	230.599	346.466	290.494	312.873	348.619	286.632	442.664
Zmym6	314.603	-0.787242	0.267524	-2.9427	0.00325368	0.027166	201.957	234.323	258.758	499.277	404.752	224.553	303.799	236.774	411.26	299.588	312.508	276.146	331.721	453.689	273.147	311.401
Fbxo28	1790.86	0.525611	0.178732	2.94078	0.00327382	0.0273182	2357.82	1910.58	1627.97	1437.14	1313.3	1589.17	1770.39	1776.02	1552.31	1686.75	2120.46	2157.74	1615.9	2000.22	1602.67	2135.27
Arid5a	717.126	1.22209	0.415705	2.9398	0.00328429	0.0273736	858.098	590.013	831.115	409.133	640.613	1217.9	664.156	1154.42	268.46	211.489	405.568	1044.77	261.297	425.493	865.082	1626.4
Prr13	10294.2	1.10365	0.375394	2.93997	0.00328246	0.0273736	28168.2	8841.73	8489.13	6621.93	7098.61	8742.13	8982.66	8870.93	9258.53	7223.42	15212.3	10758.9	8519.38	8420.63	8675.38	10823.5
Bcdin3d	100.335	0.889898	0.302775	2.93914	0.00329124	0.0273835	105.673	73.6268	115.512	72.0581	57.3417	128.914	108.602	124.543	86.5928	85.5937	109.225	124.661	62.5747	73.6985	123.593	153.144
Ccnd3	2297.83	0.710957	0.241886	2.93922	0.00329037	0.0273835	3727.24	2570.2	2213.22	1583.4	1640.71	2472.45	1703.21	2130.68	1818.17	3204.49	2329.87	2593.97	1934.97	1956.18	1889.73	2996.82
Tbc1d30	192.881	1.41953	0.482915	2.9395	0.00328747	0.0273835	326.483	236.738	201.429	62.3918	49.9427	187.909	152.947	127.955	176.138	382.654	124.493	239.028	145.744	186.316	204.236	281.695
RP23-241H7.1	69.0672	5.24055	1.78322	2.93881	0.00329478	0.027397	250.777	3.39816	216.704	2.63627	0.924865	7.64746	1.81003	1.70607	174.17	13.0908	169.122	3.43103	3.16834	3.31229	6.13584	247.042
Tma7	2088.32	0.574804	0.195625	2.9383	0.00330021	0.0274262	2512.06	2435.42	2017.55	1120.77	1868.06	2146.71	1925.44	2685.9	1944.17	2126.04	2166.68	2342.47	2073.56	1967.24	2077.21	2003.9
Pik3ip1	626.731	-1.72839	0.588304	-2.93792	0.00330424	0.0274437	61.3146	776.674	457.754	823.848	1097.82	302.609	906.511	340.454	603.093	477.265	1087.24	293.873	387.841	891.832	540.729	978.84
Cycs	1647.06	0.770908	0.262475	2.93707	0.00331329	0.0274868	3145.31	1784.37	1874.75	1505.79	1143.78	1873.09	1324.75	1785.79	940.33	1331.64	1564.57	1976.6	1395.52	1208.8	1729.68	1768.19
Zfp651	32.1623	-2.74881	0.935878	-2.93714	0.00331251	0.0274868	0	16.9908	11.4557	7.90881	71.2146	36.0523	21.7203	10.2364	26.5682	135.943	78.6888	4.57471	26.9309	27.3264	28.9261	10.0605
Gm9320	473.993	1.28732	0.438328	2.93688	0.00331529	0.0274874	722.363	519.918	392.358	326.019	108.209	799.706	417.211	780.528	674.046	310.151	268.951	598.143	426.141	305.559	405.842	528.738
Zmym3	1753.89	-0.587214	0.200011	-2.93591	0.00332572	0.0275579	1053.38	1975.2	1395.01	1571.7	2224.84	1974.39	1800.13	1160.84	2120.92	1901.67	1645.32	1518.79	1816.95	2100.76	1721.13	2081.2
Slc16a6	372.311	1.69062	0.575915	2.93555	0.0033296	0.027574	991.694	268.085	310.208	97.7409	105.048	506.268	315.24	231.435	358.68	308.987	150.836	708.019	394.944	299.615	480.071	430.104
Tmprss11e	9.42422	6.57079	2.23884	2.93491	0.00333641	0.0276144	0	2.26544	5.72785	0	0	0	2.71504	39.2397	0	6.04191	82.2122	5.71838	0	2.48422	4.38275	0
Arhgef26	602.193	-1.6345	0.557101	-2.93393	0.003347	0.027686	307.986	374.874	739.355	1321.8	357.712	66.1582	591.499	228.887	1057.42	466.395	1223.05	313.608	959.67	784.129	501.855	340.697
Dgka	1165.79	1.33289	0.454331	2.93373	0.0033491	0.0276873	4364.14	736.268	1095.93	771.549	663.128	650.034	920.399	928.104	968.264	1497.39	1394.08	1387.28	1215.06	730.36	806.425	524.266
Thada	509.766	-0.719418	0.245239	-2.93354	0.00335123	0.0276889	335.946	514.255	486.867	652.917	713.071	558.264	459.747	300.269	439.852	624.33	382.874	545.534	579.806	440.535	557.485	564.508
Camkv	29.2752	2.55191	0.870654	2.93102	0.00337849	0.0278819	9.70394	32.3015	39.4941	1.54475	9.75484	17.2169	10.3409	63.7304	20.3545	74.7381	41.2913	23.6573	5.4615	68.5157	19.0739	31.2241
Lamb1	1805.87	1.98945	0.678752	2.93103	0.00337835	0.0278819	1444.36	1359.46	1498.04	536.088	460.092	2126.53	1465.75	4326.51	163.028	1742.52	2384.11	2516.84	1091.04	2075.28	1364.15	4340.11
Hist1h2be	121.996	1.34486	0.45898	2.93011	0.00338846	0.0279479	334.406	87.3016	136.399	66.3	47.5548	61.0709	122.53	101.192	210.145	114.357	157.552	102.144	96.2234	145.14	105.638	63.981
Srbd1	472.114	-0.444296	0.151677	-2.92923	0.00339798	0.0280103	334.369	518.786	552.738	579.101	492.953	498.177	438.932	388.985	438.868	463.213	425.155	419.729	487.924	574.682	503.139	437.075
Ttc39b	949.119	1.50123	0.512677	2.92821	0.00340916	0.0280862	2355.62	850.113	951.033	592.463	520.721	1360.97	708.809	625.377	591.738	211.372	1109.42	1363.25	420.374	968.95	1225.16	1330.55
Clpb	921.245	0.769645	0.262899	2.92753	0.00341669	0.028132	972.704	1086.64	993.805	556.174	743.363	1761.27	821.721	1049.9	830.531	654.135	449.083	1355.09	682.934	744.382	901.046	1137.14
BC027231	320.027	-0.641147	0.219058	-2.92684	0.00342426	0.0281781	201.785	286.293	299.534	400.327	409.921	376.503	342.691	262.071	232.672	387.096	328.306	267.325	338.644	350.398	362.555	274.304
BC147527	10.679	4.21874	1.4422	2.92521	0.00344222	0.0283096	11.0405	4.53088	7.63714	2.63627	0	1.09249	9.95515	23.032	24.6002	3.02095	0	29.7356	0.792084	11.593	41.1978	0
Mrps10	466.918	0.464436	0.158834	2.92403	0.00345527	0.0284005	472.257	537.813	471.501	432.013	447.697	636.055	393.992	648.588	366.771	338.719	337.694	595.042	368.171	427.732	473.985	522.658
Zfp251	336.786	-0.975486	0.333773	-2.9226	0.0034712	0.028515	148.258	249.198	196.656	507.043	411.565	249.089	359.29	249.94	400.492	460.192	256.032	332.81	522.776	368.492	331.336	345.412
Sgce	8.55667	-6.91467	2.36608	-2.92241	0.00347329	0.0285157	0	21.6807	4.47282	5.48971	3.42299	1.90098	0	0	0	0	0	0	67.5344	10.8066	21.5985	0
Olr1	70.959	-2.13082	0.729427	-2.92123	0.00348652	0.0286079	8.47536	20.8691	49.1062	180.826	88.2644	22.644	29.874	48.2703	58.1648	190.367	140.648	19.4019	67.9651	47.9446	47.4898	115.034
Erap1	1102.54	-1.03628	0.354791	-2.92083	0.00349102	0.0286284	815.418	798.567	1497.83	1528.16	1331.81	378.003	1112.26	785.647	808.855	1306.06	1665.38	650.752	1757.63	1007.76	1051.86	1144.67
Fam35a	106.549	-0.916223	0.313724	-2.92047	0.00349499	0.0286444	66.2429	74.7595	127.922	169.6	99.8855	76.4746	104.982	67.3899	157.441	102.712	96.3057	100.644	172.674	115.93	82.3956	89.4271
Eid2	107.321	-2.82637	0.968291	-2.91892	0.00351243	0.0287709	31.5442	134.794	110.738	279.445	284.859	197.741	123.987	26.4441	72.8166	95.6635	21.1403	32.0229	73.6638	0	78.0129	154.262
Polr2e	2159.61	0.450668	0.154422	2.91842	0.00351809	0.0288007	2627.99	2796.36	2118.03	1818.84	2019.57	2496.61	1919.51	2884.13	1817.26	1377.85	1917.37	2262.65	1851.85	1818.05	2272.72	2555.02
Hmga1-rs1	457.436	5.26647	1.80487	2.91793	0.00352369	0.02883	2209.67	3347.19	28.6393	14.9389	34.22	68.8271	5.43008	21.3259	40.3444	26.1816	1444.59	26.3046	9.50501	14.0772	21.0372	6.70703
Irak2	1688.56	0.640767	0.219668	2.91698	0.00353434	0.0289006	2878.53	1485.53	1603.71	1155.72	1220.34	1426.11	1849.13	1508.37	2043.28	1913.93	1899.08	1634.42	1480.93	1846.69	1617.35	1453.78
Aip	1459.38	0.551424	0.189116	2.9158	0.0035478	0.0289803	1495.05	1301.38	1505.12	1157.92	1134.23	1507.84	1395.18	2323.67	1331.83	1566.54	1574.82	1497.76	1339.32	1264.9	1293.83	1660.71
Fzd8	127.431	-1.51672	0.520178	-2.91577	0.00354815	0.0289803	50.4708	87.2194	108.829	142.359	270.986	176.984	125.797	77.6263	115.129	45.3143	258.381	70.9079	158.417	77.8388	138.495	134.141
Sema4f	194.185	2.44832	0.83978	2.91543	0.00355202	0.0289953	95.4009	637.63	223.523	38.5791	96.5457	40.5017	260.464	605.024	44.1598	78.465	244.039	259.974	41.1468	153.494	113.811	174.206
Stom	3830.41	1.07072	0.367315	2.91499	0.00355702	0.0290195	6496.53	2983.58	4126.92	1662.61	2743.15	7521.82	4389.32	3175	2809.34	3036.06	4784.75	4172.13	2183.78	4218.2	3528.11	3455.24
Prpf18	1076.1	-0.342174	0.117395	-2.91473	0.00355997	0.029027	841.067	1084.18	1034.36	1267.25	1255.09	1090.41	1112.91	914.283	984.339	1098.26	1106	1098.29	1099.11	1068.69	1091.35	1072.08
Nme5	36.4781	-3.17228	1.0888	-2.91356	0.00357338	0.0291197	0	26.7537	24.0432	127.591	126.621	29.0682	52.5948	10.4494	34.2022	7.0103	44.1785	19.6455	20.6573	35.7876	0.926851	24.1191
Siae	345.93	-1.00209	0.344013	-2.91295	0.0035803	0.0291594	299.67	359.072	219.568	450.802	436.536	172.614	405.446	242.262	431.98	530.681	362.908	166.977	529.904	232.688	285.755	408.011
Brinp3	79.1673	-2.33824	0.802932	-2.91213	0.00358975	0.0292197	59.4882	19.7624	95.2234	176.609	90.9941	10.1133	86.7076	17.8758	233.926	37.9336	54.9942	14.1161	190.335	53.7544	44.1869	80.6575
Rpsa-ps4	10.2364	1.85435	0.636813	2.91193	0.00359202	0.0292215	18.9265	9.06176	9.54642	1.75751	4.62433	14.2024	14.4802	11.0895	7.87207	8.05587	4.69784	17.1551	6.33667	13.2492	14.9013	7.82487
Hprt	3926.38	-0.513725	0.176478	-2.91099	0.0036029	0.0292767	4315.25	3609.98	4211.88	5082.73	4406.98	3233.78	3153.97	2970.27	4252.89	4347.15	4289.13	3052.47	5260.23	4061.7	3798.09	2775.59
Plk1	1366.95	1.43871	0.494235	2.91099	0.00360289	0.0292767	1739.66	2186.15	2137.44	480.68	244.164	1727.23	741.206	1728.25	876.752	1849.83	882.019	1742.96	1196.84	1261.15	1236.81	1839.96
Osgin1	1254.22	-0.966691	0.332143	-2.91047	0.00360887	0.0292949	1042.79	1078.28	985.618	1909.65	1957.95	1300.11	1114.6	836.569	2326.93	862.762	1619.78	688.824	1148.98	746.244	987.024	1461.35
Vcpkmt	233.844	0.656579	0.225595	2.91044	0.00360925	0.0292949	293.361	272.985	248.207	183.66	197.921	207.574	266.979	320.742	199.754	135.943	177.343	321.373	212.279	163.958	245.434	293.992
Cfhr2	96.7342	-3.18703	1.09532	-2.90969	0.00361789	0.0292983	53.7435	29.7762	117.106	159.438	66.6313	15.1234	148.024	0	145.712	30.3915	13.7211	26.7228	499.542	178.974	58.0301	4.81034
Mall	4827.6	1.4694	0.504995	2.90973	0.00361741	0.0292983	14735.9	4964.71	6391.33	1949.96	1741.52	3306.98	3595.62	3836.11	3744.15	4032.97	7293.4	5592.58	5033.7	3486.19	3699.04	3837.54
Rab27a	1335.23	2.48692	0.854643	2.9099	0.00361544	0.0292983	10572.2	702.542	783.031	587.788	416.751	552.784	683.55	198.577	1237.73	1042.47	1048.52	642.17	1030.89	850.911	701.612	312.201
Ubl5	3218.24	0.336467	0.115629	2.90988	0.00361567	0.0292983	3534.03	4047.32	3046.54	2808.84	2803.78	3179.88	3034.37	3978.65	3116.86	3277.28	3366.2	3130.95	2820.21	2927.33	2999.59	3419.94
Igf2bp2	2116.02	1.13299	0.389447	2.90924	0.00362313	0.0293071	4050.52	1866.23	2502.27	868.636	1185	2690.91	2006.06	1099.45	1518.04	1987.91	1423.52	3118.35	1714.36	2310	2475.29	3039.71
Manba	2429.76	-0.585922	0.201392	-2.90936	0.00362172	0.0293071	2286.42	2871.69	2305.63	3753.59	3063.61	2971.16	1993.51	1804.64	2009.61	1704.62	2117.61	2157.17	2560.73	2753.16	2457.6	2065.44
Mapk13	1079.22	1.01701	0.349643	2.90871	0.00362924	0.0293071	2280.25	985.316	948.974	619.837	926.792	984.01	994.762	1235.89	1059.77	1072.71	2069.58	839.941	604.559	851.529	933.085	860.579
Notch2	3815.34	-0.678836	0.23338	-2.90872	0.00362913	0.0293071	2036.18	2975.65	3184.69	4914.01	4531.84	3465.39	4562.17	2838.05	4941.69	3377.43	3872.19	3652.9	4209.93	4762.25	3995.31	3725.76
P4hb	39178.6	0.900958	0.309732	2.90883	0.0036278	0.0293071	74294.9	35590.9	36962.5	23856.9	27422.8	70769.2	39592.9	38150.2	40791.9	30530.1	23988.9	41395.3	31105	34370.6	37839.1	40196.1
Acy1	351.438	1.09031	0.375013	2.90738	0.00364465	0.0294149	521.398	603.967	354.279	117.725	265.201	278.222	196.808	514.178	311.893	299.486	396.525	320.158	253.42	364.993	322.87	501.89
Ankdd1b	15.822	5.98473	2.05909	2.90649	0.00365504	0.0294488	126.303	27.8604	0	1.428	1.00323	22.4923	1.37042	0.645855	45.877	0.458699	0	21.5185	0	1.34564	2.84883	0
Ccpg1os	153.815	-0.963611	0.331504	-2.90679	0.00365163	0.0294488	67.6852	109.181	152.033	252.21	262.285	145.235	172.967	153.201	186.846	107.142	117.195	115.389	147.343	164.952	174.699	132.68
Cdkn2d	116.221	1.67783	0.577265	2.90652	0.0036547	0.0294488	313.865	39.6452	111.693	78.2094	36.9946	49.1622	94.1214	126.249	103.321	139.971	69.2931	163.546	72.8718	132.492	115.704	212.389
Eif2s2	5469.71	1.30772	0.450203	2.90473	0.0036757	0.0295485	17864	3275.86	5679.4	3992.73	2684	5691.53	3078.23	5083.78	4058.04	5440.54	7952.45	6066.31	5042.12	4358.27	3743.1	3505.03
Ptk2	2297.51	-0.398607	0.13722	-2.90489	0.00367386	0.0295485	1570.9	2168.03	2242.45	2594.09	2620.14	2180.62	2629.97	1917.63	2418.69	2672.54	2413.52	2248.47	2356.45	2196.88	2459.6	2070.24
Recql	551.152	-0.948281	0.326443	-2.90489	0.00367379	0.0295485	643.51	556.23	681.783	1007.75	685.66	363.559	544.239	344.568	350.855	492.204	573.394	262.8	700.134	488.912	636.569	486.26
Tmem128	911.998	0.594768	0.204754	2.9048	0.00367488	0.0295485	1573.59	930.057	1061.09	777.57	758.674	727.264	773.225	996.975	861.927	712.027	884.754	1050.42	856.695	839.271	998.354	790.087
Mea1	1772.33	0.633811	0.218295	2.90345	0.00369072	0.0296192	1999.9	1927.89	2151.76	1116.9	1632.39	1515.29	2125.88	2368.03	1434.68	1794.45	1914.37	1745.25	1192.09	1503.78	1831.99	2102.65
Phf12	1404.95	-0.457241	0.157467	-2.90372	0.00368754	0.0296192	1038.34	1252.84	1350.85	1633.85	1798.37	976.785	1498.79	1304.66	1899.65	1473.64	1459.24	1218.83	1465	1402.81	1486.67	1218.91
Slc6a19	45.2714	-3.33675	1.14922	-2.90349	0.00369031	0.0296192	4.78435	32.7893	5.2125	78.6479	94.5996	279.364	30.2576	3.10515	2.98492	77.2493	2.85011	14.6226	50.6363	10.5874	8.06753	28.5845
Rpl31	10833.1	0.535859	0.184622	2.90247	0.00370234	0.029672	10755.5	12612.8	9607.99	8748.24	9145.89	15799.4	9199.56	15562.2	8144.12	11716.9	8061.28	13194.8	9363.08	9148.66	10164.4	12105.1
Slc7a1	3347.71	1.02926	0.354612	2.90251	0.00370191	0.029672	4068.76	3210.83	3513.2	2155.19	2344.58	9001.62	2101.36	2950.07	2029.63	2474.32	1926.43	5885.05	1822.42	2450.15	3028.84	4600.91
Ung	182.699	1.12305	0.386943	2.90237	0.00370354	0.029672	181.419	223.468	299.837	89.4467	69.3323	283.42	124.586	213.158	119.87	179.099	212.615	245.398	134.92	111.225	188.755	246.632
Usb1	869.488	0.523194	0.18038	2.90051	0.00372559	0.0298319	1239.27	845.797	775.643	690.161	841.883	874.796	805.065	902.963	825.277	698.001	913.825	973.015	632.626	911.803	918.779	1062.91
Elmo2	914.202	-0.351091	0.121093	-2.89936	0.00373929	0.0299248	821.177	811.719	916.973	1032.94	1060.04	833.245	797.321	722.543	1098.61	1173.91	983.074	804.868	896.962	924.947	845.574	903.328
Ccdc89	17.7634	-1.62129	0.559303	-2.89878	0.00374621	0.0299634	14.1949	18.1235	27.6846	28.1202	47.1681	15.2949	13.5752	12.7955	11.8081	5.03492	10.5701	4.57471	21.3863	20.7018	17.531	15.6497
Tmem205	505.703	0.748877	0.2584	2.89814	0.00375389	0.030008	783.874	364.736	391.403	366.442	502.202	515.657	491.422	576.653	714.39	477.311	478.005	653.039	328.715	368.492	466.324	612.575
Cmya5	14.6797	-2.52774	0.872437	-2.89733	0.00376352	0.0300681	3.15442	20.389	9.54642	26.3627	24.0465	1.09249	27.1504	6.82429	20.6642	4.02794	11.7446	3.43103	29.3071	24.0141	17.531	5.58919
4931414P19Rik	317.843	-0.527049	0.181994	-2.89597	0.00377985	0.0301817	222.387	276.384	294.984	307.565	425.438	210.851	369.246	267.853	398.523	355.465	371.129	256.184	346.933	370.148	329.582	282.813
Ntn4	442.054	-1.01765	0.351452	-2.89557	0.00378476	0.030204	438.862	339.012	334.532	569.146	632.591	218.913	453.795	243.03	385.005	568.588	631.998	187.897	553.63	536.319	492.798	486.745
Exoc6b	1402.27	-0.631845	0.21827	-2.89479	0.00379417	0.030249	782.076	1487.78	1142.54	1757.03	1696.67	1337.93	1526.61	1146.46	1301.35	2068.86	1441.72	1270.77	1509.9	1377.38	1305	1284.17
Rpl7	26794.8	0.431703	0.149151	2.8944	0.00379879	0.030249	28508.2	30535.6	26345.6	21585.6	22681.3	33731.2	27208.2	35361.2	23946.3	27297	19700.7	29314.8	24821.3	23887.5	26812.2	26979.7
Sbspon	25.9448	-4.16744	1.43968	-2.89471	0.00379515	0.030249	0	18.1235	4.77321	37.7866	13.873	6.55496	113.127	0	85.6088	46.3213	27.0126	3.43103	10.2971	39.7475	1.7531	6.70703
Tsc22d3	521.533	0.876156	0.302708	2.8944	0.00379888	0.030249	724.332	357.781	312.684	457.937	436.642	908.704	535.661	857.449	375.077	447.006	325.869	857.408	434.8	345.038	402.738	565.408
Gm10642	22.088	1.6165	0.55868	2.89343	0.00381062	0.0303256	45.7391	21.5217	30.5485	10.5451	13.873	39.3298	10.8602	32.4154	26.5682	11.0768	16.4424	26.3046	9.50501	9.93687	21.9137	26.8281
Ptges	261.344	2.03313	0.702739	2.89315	0.00381399	0.0303354	147.532	115.835	164.856	25.8183	93.1668	1360.36	153.185	288.482	106.205	355.037	154.844	379.22	81.001	166.193	191.641	398.127
Mtss1	2147.47	-0.543398	0.187863	-2.89252	0.00382162	0.0303623	1712.85	1276.57	1678.26	2549.27	2113.32	1512.01	2353.04	1856.21	3078.96	3019.95	2407.64	1718.95	3044.77	2528.93	2063.4	1445.37
Slc39a14	978.574	1.21704	0.420736	2.89264	0.00382016	0.0303623	2906.09	773.516	698.251	852.349	417.366	1135.01	995.281	748.425	986.931	676.261	784.911	1433.91	916.851	762.525	846.866	722.65
Igsf9	6564.6	-0.562648	0.194598	-2.89133	0.00383611	0.0304604	4533.64	4672.37	5496.81	9082.37	8327.59	5303.45	7215.11	7028.99	8392.04	6226.22	6115.83	5642.44	8008.54	7697.31	6370.97	4919.94
Cldn7	12909.2	0.68888	0.238325	2.89051	0.00384618	0.0305082	25517.5	12911.2	13610	10756.9	9670.35	13663.6	10864.7	12948.8	9932.71	10957	13081.2	13985.4	12106.5	10643.2	11782.5	14115.1
Gnas	21138.8	0.361378	0.125026	2.89041	0.00384737	0.0305082	21510.2	22250.1	20706.9	15903.1	16921.2	24168.5	18639	24624.1	24306.1	25974.2	20346.3	21668.2	19957.4	19221.3	19482.1	22542.5
Tmem229a	70.0216	-2.93614	1.01585	-2.89032	0.00384853	0.0305082	1.57721	53.2378	109.784	272.415	93.4114	110.342	56.1108	2.55911	101.353	12.0838	25.8381	49.1781	43.5646	100.197	47.3336	41.36
Gm13237	416.334	1.01822	0.352391	2.88946	0.00385907	0.0305747	329.637	517.653	441.999	227.598	196.996	667.514	264.264	765.174	357.195	451.129	337.07	552.396	389.705	404.099	369.904	389.008
Acad10	339.191	-0.663701	0.229753	-2.88875	0.00386771	0.0306261	231.594	349.598	308.734	414.999	440.568	304.079	353.369	237.596	392.848	285.544	253.175	324.825	402.352	287.959	415.978	423.83
Fbrsl1	851.491	-1.54311	0.534318	-2.888	0.00387705	0.0306745	373.475	1002.73	518.334	1846.53	1734.04	761.917	449.317	443.665	1288.67	436.121	699.739	564.822	447.781	1432.38	877.181	747.168
Setd2	1413.93	-0.88712	0.307203	-2.88774	0.00388026	0.0306745	1179.75	1274.31	1255.35	1126.57	1631.46	833.573	1692.38	547.649	1715.13	1990.81	1986.01	892.068	2079.22	2032.92	1396.34	989.287
Ypel1	54.9013	-2.69564	0.933466	-2.88777	0.00387979	0.0306745	0	37.3797	47.7321	160.813	146.129	3.27748	46.1557	34.1215	15.7441	46.3213	49.3273	18.2988	39.6042	117.586	82.3956	33.5352
Nop2	1606.38	0.409296	0.14177	2.88704	0.00388885	0.0306914	1629.26	2228.06	1689.72	1327.8	1363.25	1902.03	1382.86	1898.86	1135.55	1544.71	1482.17	1682.35	1235.65	1535.25	1554.12	2110.48
Rps19	9899.13	0.681146	0.235905	2.88737	0.00388476	0.0306914	9575.06	11761.2	8748.5	6804.95	8221.93	16219	8760.42	14541.4	6504.51	10189	5949.4	12568.7	7854.85	7542.42	10365.6	12779.2
Ttc30a1	167.147	-0.90706	0.314169	-2.88717	0.00388721	0.0306914	77.2834	131.395	196.656	301.414	265.436	116.897	132.132	157.812	164.329	200.39	164.424	145.247	152.872	148.225	170.051	149.79
Csf2	857.416	1.89591	0.656796	2.88661	0.00389415	0.0307162	123.023	1264.11	910.728	177.509	587.29	1426.8	1171.09	2380.83	512.668	486.373	532.03	1218.02	236.041	733.672	982.611	975.873
Calcoco1	2854.72	-1.11186	0.385514	-2.8841	0.0039254	0.0308045	755.735	2734.19	2088.73	3976.17	4982.99	2079.39	3656.32	2782.62	3661.02	3221.83	2641.52	1817.16	2623.69	2974.94	3159.45	2519.84
Cir1	616.23	-0.519043	0.180007	-2.88345	0.00393341	0.0308045	527.85	529.377	595.589	787.3	656.999	378.365	697.214	548.062	830.759	720.288	752.26	440.786	730.23	692.526	639.925	332.151
Echdc2	1886.73	-1.30987	0.454211	-2.88383	0.00392867	0.0308045	512.927	1673.71	2203.85	3269.04	3013.36	1407.22	2453.75	1379.75	3024.3	737.3	1562.24	1310.43	1666.07	2162.8	1844.21	1966.72
Eif3b	8461.05	0.36696	0.127234	2.88413	0.003925	0.0308045	9466.42	10211.5	9242.84	7459.77	7554.3	9423.85	7603.92	9989.06	5997.53	7412.41	7166.56	9115.1	7141.43	7617.44	9652.56	10322.1
Gm11518	2066.34	0.406646	0.141023	2.88355	0.00393219	0.0308045	2200.21	2342.46	1998.07	1716.21	2031	2978.14	1852.56	2854.26	1362.85	1468.18	1349.45	2363.98	1854.27	2000.62	2222.05	2467.07
Gramd3	346.724	-1.00833	0.349568	-2.88449	0.00392045	0.0308045	298.093	305.834	443.908	431.47	483.705	187.909	241.639	243.968	354.243	353.451	624.813	132.666	439.607	367.664	437.398	201.211
Grb10	131.777	-6.05428	2.09894	-2.88445	0.00392101	0.0308045	4.49253	53.265	59.3654	203.52	62.8715	174.67	0	0	18.5088	2.91016	939.442	2.64416	203.625	0	206.88	176.23
Grhl3	160.958	1.91894	0.665304	2.8843	0.00392284	0.0308045	258.663	236.738	211.931	24.6052	20.347	100.509	223.538	96.3931	248.954	132.922	88.0845	251.609	114.852	91.088	154.273	320.82
Lypd3	88.3794	2.69407	0.934255	2.88366	0.00393083	0.0308045	11.0405	86.0867	101.192	57.1192	40.6941	39.3298	68.781	476.847	19.6802	27.1886	111.574	194.425	7.92084	84.4634	50.8398	36.8887
Myrf	11192.2	-1.2352	0.428208	-2.88458	0.00391933	0.0308045	8322.49	13671.6	9922.88	14893.4	18026	10753.3	12575.4	2929.79	15073.2	12673.1	4176.8	8250.7	12988.2	13349.8	9687.12	11781.6
Nr4a1	204.765	1.12535	0.390164	2.8843	0.00392289	0.0308045	266.549	186.899	212.885	113.36	116.533	243.626	233.493	177.432	113.161	152.055	379.351	220.73	74.4559	283.201	257.705	244.807
Rpa2	642.591	1.01188	0.350832	2.88422	0.00392383	0.0308045	521.636	1163.16	1015.15	447.827	323.47	737.894	470.944	940.14	509.269	346.532	687.787	725.999	314.973	646.185	517.148	913.344
Rpl27-ps3	2066.34	0.406646	0.141023	2.88355	0.00393219	0.0308045	2200.21	2342.46	1998.07	1716.21	2031	2978.14	1852.56	2854.26	1362.85	1468.18	1349.45	2363.98	1854.27	2000.62	2222.05	2467.07
Ncoa3	1976.6	0.7805	0.27078	2.88241	0.00394642	0.0308556	3613.74	1819.78	2004.76	1471.23	1398.96	1953.79	1473.81	1373.75	2759.76	2275.08	2625.36	2336.38	1391.14	1566.08	1681.52	1880.43
Slc13a2	744.986	2.23223	0.77434	2.88275	0.00394219	0.0308556	3756.92	198.226	747.485	82.6032	209.02	210.851	579.209	292.592	1246.74	426.961	1236.71	602.717	697.826	847.946	611.831	172.147
Tmsb10	21038.8	0.741692	0.257306	2.88253	0.00394491	0.0308556	26868.7	22675.6	19489	15008.3	18723.1	25359.2	15582.1	27935.7	13497.2	22590.5	20864.7	21111.9	11670.1	21151.8	17669.9	36423.2
2200002D01Rik	2825.58	0.861792	0.299016	2.8821	0.00395037	0.0308696	6499.85	2414.29	2779.19	1897.47	1945.39	3191.27	2278.76	3092.98	2689.95	2296.7	2992.84	3008.16	3087.88	2276.6	2319.29	2438.62
Taldo1	4190.5	0.530412	0.184073	2.88153	0.00395745	0.030908	5384.06	4850.57	5225.52	3425.92	3509.16	4206.31	3809.23	4664.71	2937.93	4504.92	3449.6	5169.26	3599.7	3488.54	4170.05	4652.47
Cul4a	2543.07	-0.347305	0.12057	-2.88052	0.00397014	0.0309224	2062.91	2959.86	2148.78	2919.28	2822.34	2697.45	2562	2420.85	2478.97	2634.62	2449.05	2365.39	2977.24	2581.38	2254.47	2354.57
Larp1b	569.085	0.909686	0.315748	2.88105	0.00396353	0.0309224	1212.74	480.262	692.864	467.827	399.278	672.489	492.291	477.75	593.133	358.916	435.706	831.418	472.61	500.773	566.61	450.689
Prox1	96.495	-2.3522	0.816483	-2.8809	0.00396546	0.0309224	1.33785	184.449	84.5606	106.592	190.218	97.2905	149.676	17.0578	58.4273	12.8108	91.3392	53.3492	67.179	91.3007	217.453	120.879
Sestd1	3350.87	-0.545599	0.189398	-2.88071	0.00396783	0.0309224	2627.34	3111.07	3297.85	4055.28	3518.19	1830.85	3942.51	2566.79	4042.34	3635.86	3573.79	3098.75	4530.44	3477.85	3923.78	2381.21
Zfp558	38.9217	-1.27556	0.442803	-2.88064	0.00396863	0.0309224	18.0242	18.1224	26.0959	67.1187	48.5912	10.5315	70.1993	21.3783	42.7076	51.8194	49.397	29.6621	55.4342	36.845	63.664	13.1571
Tmco3	1843.74	1.59386	0.553568	2.87926	0.00398612	0.0310299	7240.98	1336.61	1793.77	978.935	920.241	1004	1524.95	1186.57	1414.02	1423.88	3663.14	1481.06	1382.19	1723.22	1321.84	1104.42
Farp1	4599.5	-0.819729	0.284786	-2.87841	0.00399689	0.0310799	2302.06	5166.89	3838.6	4859.62	7205.69	5976.48	4219.28	2751.63	6585.17	3809.88	4212.86	4317.53	4479.18	4570.25	4898.83	4398.14
Lrp1	1971.05	-1.74823	0.60735	-2.87846	0.00399628	0.0310799	1565.87	892.406	469.694	2578.25	3065.53	2418.49	1131.41	725.547	3326.24	4820.83	848.694	643.743	4217.85	1638.7	2070.66	1122.81
Ttc26	414.586	-0.912345	0.317001	-2.87805	0.00400144	0.0310984	214.358	433.081	411.06	773.149	579.96	349.254	370.81	277.393	446.251	419.466	355.65	386.99	304.404	361.259	420.416	529.884
Eme1	207.557	1.33786	0.464908	2.8777	0.00400587	0.0311158	177.89	315.634	290.442	87.4526	42.076	240.956	114.794	334.43	133.367	176.567	212.611	269.954	180.185	228.032	196.325	320.2
Camsap2	1120.85	-0.843056	0.293025	-2.87708	0.0040138	0.0311604	386.956	928.31	994.779	1622.69	1178.66	781.631	1259.4	854.424	1509.4	1508.66	1213.81	996.974	1219.23	1416.91	1108.17	953.599
Atp2a3	2126.06	3.63236	1.26319	2.87555	0.00403327	0.0312436	15804.7	1882.46	1531.36	987.082	142.352	2893.63	376.279	57.4549	2005.75	166.773	2059.01	1483.41	269.237	1277.5	1257.72	1822.24
Gm10762	27.7959	-1.37662	0.478717	-2.87564	0.00403211	0.0312436	15.7721	29.4507	16.2289	30.7565	49.9427	18.5724	31.6755	18.7668	39.3603	47.3283	17.6169	11.4368	39.6042	29.8106	27.173	21.2389
Vash1	31.114	-2.25116	0.782788	-2.87582	0.00402975	0.0312436	3.15442	29.4507	25.7753	31.6353	112.834	17.4799	35.2955	29.0032	8.85608	52.3632	30.536	5.71838	42.7725	20.7018	25.4199	26.8281
Zfp955a	113.048	-0.786245	0.273411	-2.87569	0.00403143	0.0312436	70.9745	49.8397	105.965	173.115	120.232	67.7346	89.5963	87.0097	145.633	145.006	162.075	90.3504	137.031	139.944	131.482	92.7806
Rpn1	7403.52	0.566554	0.197042	2.87529	0.00403659	0.0312524	11504.2	8000.4	8666.24	5548.47	6078.22	9356.12	6444.6	7388.15	6078.22	7282.51	5343.79	7895.94	6457.07	6658.53	7641.75	8112.15
Prkrip1	500.269	0.518786	0.180472	2.8746	0.0040454	0.0312866	588.734	552.698	481.872	457.804	462.986	417.985	463.144	693.977	378.91	376.328	475.019	571.196	375.569	552.486	587.482	568.11
Srebf2	14761.4	0.452564	0.157428	2.87473	0.00404369	0.0312866	15496.1	15764.1	16661.4	11808.7	9477.1	15312.4	15385.2	17326.9	13120.8	16529.6	15385.4	13335.3	12444.4	14795.2	14300	19039
Csrnp1	272.046	1.37647	0.479284	2.87194	0.00407964	0.0315344	290.207	207.288	373.265	75.5731	252.488	362.708	216.298	535.707	103.321	174.208	182.041	305.362	108.516	283.201	269.977	612.575
Atp11a	4110.49	-0.91468	0.318574	-2.87117	0.00408961	0.0315943	2737.97	3455.82	4459.04	6240.48	4409.13	1879.56	4405.37	2544.93	3579.48	4222.54	8638.54	3209.77	5359.21	4016	3457.95	3152.1
Unkl	299.211	-0.523665	0.182418	-2.87069	0.00409576	0.0316247	258.972	249.442	351.853	384.012	310.34	251.81	306.349	235.997	330.215	434.113	300.696	231.966	348.796	281.379	254.36	257.079
Tha1	67.6739	-0.951174	0.331383	-2.87031	0.00410064	0.0316452	40.163	59.9123	74.0296	83.5439	100.648	74.3013	47.7503	62.644	64.3737	89.595	74.1803	31.8111	79.6676	49.8504	82.0396	68.2733
Lrrc56	187.079	-1.25444	0.437089	-2.86998	0.00410494	0.0316613	53.5896	108.959	159.184	317.064	431.491	131.331	166.459	126.262	279.427	217.489	141.012	203.065	162.723	189.486	178.121	127.597
Susd1	287.949	0.969231	0.33774	2.86976	0.0041079	0.031667	265.835	282.804	370.873	138.62	221.114	217.679	239.697	567.507	210.24	305.354	316.303	409.305	276.511	214.032	282.044	289.258
Gnai1	516.904	-1.03514	0.360759	-2.86934	0.00411329	0.0316743	310.711	494.998	466.82	413.016	461.508	452.292	429.881	279.796	660.27	568.946	647.127	363.689	1079.61	647.553	717.017	277.224
Hhex	1154.33	-1.4633	0.509952	-2.8695	0.00411126	0.0316743	238.304	952.227	814.017	1788.51	2049.53	1095.6	1271.94	844.782	2152.03	1325.43	406.552	731.075	1170.51	1265.98	1394.8	968.051
Gabrq	5.99606	-4.88442	1.70299	-2.86814	0.00412894	0.0317777	0	7.25796	20.0475	18.8854	7.35588	5.25016	0	1.36647	1.5745	1.83715	7.85656	0	16.6031	3.97944	2.13225	1.79065
Amy1	12.1962	-2.4082	0.839991	-2.86694	0.00414464	0.0318813	4.47142	6.70333	18.5305	25.9111	16.7647	2.40681	36.3556	2.41837	20.3814	6.65502	13.6096	2.60226	7.63952	18.2668	9.34275	3.08039
Spr-ps1	74.7932	-3.72281	1.29953	-2.86473	0.00417371	0.0320876	2.40008	172.031	42.3274	3.00875	134.674	103.917	125.361	5.51686	12.4331	237.209	5.83251	3.48071	15.8245	120.169	3.33466	209.173
Ino80b	444.634	-0.728165	0.254204	-2.8645	0.00417674	0.0320936	260.367	388.892	361.227	611.066	779.972	459.695	492.589	447.567	475.207	401.83	363.234	390.52	435.743	379.063	411.451	455.718
Arih2	2185.93	0.863466	0.301513	2.86378	0.00418619	0.0321489	4014.62	1967.26	2157.94	937.128	1779.04	2831.17	2167.85	2097.31	1761.76	2404.3	2503.71	2306.18	1907.6	2016.34	1926.65	2196.01
Cad	1512.29	0.722483	0.2523	2.86358	0.00418877	0.0321515	1452.61	2179.35	1973.24	921.816	1000.7	2064.81	1101.4	1418.6	942.68	1195.29	1026.48	2193.57	1146.94	1320.78	2008.17	2250.21
Selk	916.308	0.763853	0.266829	2.86271	0.00420038	0.0322232	1496.03	845.165	772.936	745.601	748.617	1599.38	1024.86	1128.14	840.922	777.047	720.169	971.649	621.749	678.584	831.254	858.834
Ebp	3345.73	0.796569	0.278276	2.86252	0.00420292	0.0322254	5791.18	3963.42	4181.39	2321.4	1987.41	3793.08	3067.14	3063.41	3440.15	2984.98	1961.6	4046.41	3115.85	2783.88	3475.33	3555.07
Mgst1	1837.58	-1.48167	0.51813	-2.85966	0.00424098	0.0324998	216.975	1159.21	1371.04	3042.71	2623.97	2899.74	2448.27	1427.62	2860.02	1739.77	1668.64	1067.6	1917.94	1462.37	1695.14	1800.26
Gm16026	44.6943	2.73659	0.957136	2.85915	0.00424781	0.0325347	70.7356	18.2557	36.8216	17.0417	5.03734	20.8424	7.35048	71.2808	91.2098	17.0172	3.57838	112.527	16.5364	71.5514	136.538	18.7852
AF067063	8.3247	4.23413	1.48144	2.85811	0.00426176	0.032624	21.6124	2.94894	5.81393	0	0	0.948072	7.06838	15.5457	33.3032	6.13271	0	5.95493	2.06212	8.6235	19.7775	3.40391
2810417H13Rik	966.037	1.42202	0.497732	2.857	0.00427672	0.0327209	867.812	1655.81	1653.92	363.98	136.662	1188.17	518.103	1442.08	767.709	879.331	755.286	1124.11	780.77	1128.19	917.474	1277.18
Klf11	579.779	-0.940437	0.329387	-2.85512	0.0043021	0.0328975	237.567	477.539	494.259	787.835	886.824	888.849	677.96	463.174	581.327	543.13	448.701	454.075	545.894	518.332	781	489.999
Tmem150c	44.9654	-2.5548	0.895029	-2.85443	0.00431137	0.0329507	0	49.142	34.1075	44.7819	28.7314	194.977	20.1501	6.12449	30.5688	34.2644	64.8526	23.686	82.0218	40.2168	42.6717	23.1508
Lekr1	30.0999	-1.53444	0.537742	-2.85349	0.00432415	0.0330307	16.7164	21.128	11.4481	52.4161	59.2047	21.2785	29.3331	24.4442	44.6958	31.4009	10.8081	18.0487	62.2201	34.4561	17.9851	26.0148
BC030867	112.725	1.26286	0.442912	2.85128	0.00435441	0.0332332	63.7906	186.45	155.022	43.1575	43.3596	136.575	76.8772	224.258	68.2259	84.7572	85.7753	129.931	88.4551	119.613	136.744	160.614
Tmem51	996.452	0.595599	0.208893	2.85121	0.00435532	0.0332332	1391.1	1096.47	1073.02	773.306	984.057	1339.4	948.454	1050.94	872.816	606.205	870.275	1132.24	606.737	924.129	997.513	1276.57
Camsap1	1450.58	-0.876504	0.307434	-2.85103	0.00435775	0.0332339	501.773	1355.67	1748.66	1804.18	1525.01	1453.56	1853.23	819.689	1782.42	1369.6	1220.8	1183.04	1270.49	1917.28	1264.93	2138.95
Adam11	27.7643	-2.19907	0.771576	-2.8501	0.00437052	0.0333135	0	44.7042	17.8882	49.4131	66.1446	19.0273	47.9669	19.3746	32.2757	27.9178	9.91869	12.4756	36.5447	22.5763	24.7842	13.2167
Inpp5b	877.884	0.928914	0.325995	2.84948	0.00437911	0.0333612	1959.45	773.173	1065	554.032	848.769	994.319	1002.28	788.45	843.677	456.621	569.681	1127.24	632.186	825.915	815.305	790.044
Ireb2	2038.09	-0.490089	0.172017	-2.84908	0.00438459	0.0333822	1597.72	1650.37	1820.5	2859.48	1912.62	1536.05	2045.33	1652.33	2247.48	2451	2449.92	1789.85	2307.34	2647.35	2139.66	1502.37
Zfp784	68.6018	-1.28725	0.451836	-2.84894	0.00438655	0.0333822	75.7062	66.8304	45.8228	117.753	92.4865	46.9772	75.1161	18.7668	92.4968	58.4051	72.8165	50.3218	136.238	48.8563	66.6177	32.4173
Nkiras2	1842.22	0.694093	0.243652	2.8487	0.00438978	0.033389	3577.73	1733.8	1613.05	1358.53	1625.02	2376.64	1703.17	1775.51	1840.71	1313.88	1543.49	2104.14	1621.55	1658.43	1722.29	1907.53
Pgm2	1798.49	0.938807	0.329632	2.84804	0.00439888	0.0334226	1947.9	1531.47	1566.6	983.349	1444.67	4337.29	1832.69	2468.74	1160.95	1379.6	835.058	2560.74	1212.53	1527	1827.64	2159.71
Rps10	11636.9	0.575488	0.202054	2.84819	0.00439689	0.0334226	10897.4	13950.3	10393.8	8330.95	9922.92	18721.6	10320.2	15845.2	8019	11531	7476	14644.6	9522.45	9344.46	11365.9	15903.9
Xrn2	4292.84	-0.319049	0.112061	-2.8471	0.00441197	0.0335042	3222.95	4537.78	4836.91	4907.81	4700.06	3859.33	4583.42	3995.33	3886.65	4181.31	4288.49	3895.93	4271.39	4526.74	4557.34	4434
AW146154	108.278	-0.956467	0.335999	-2.84664	0.00441836	0.0335349	59.934	45.3088	102.147	219.689	98.9606	46.9772	123.082	88.7158	158.425	145.006	120.969	84.632	137.031	136.632	91.1611	73.7773
Gm10288	1678.62	0.834596	0.293342	2.84514	0.00443925	0.0336755	2031.45	2122.72	2217.63	1106.36	1858.05	1486.88	1379.24	2814.17	1270.36	898.23	1079.33	1977.42	863.372	1905.4	1783.78	2063.53
Gnpda2	402.963	-0.728169	0.255984	-2.84458	0.00444694	0.033716	217.699	353.644	397.515	498.912	527.483	294.331	446.645	351.673	427.115	321.81	662.641	307.119	432.878	449.681	439.078	319.183
Sgk2	150.177	3.00314	1.05656	2.84237	0.00447795	0.033933	966.659	82.5443	176.788	20.5184	17.1271	29.0275	73.2785	41.442	71.7071	42.971	466.708	80.7017	97.8518	87.1633	134.85	13.5004
Cd63	3809.75	1.25849	0.442818	2.84199	0.00448326	0.0339552	9968.46	3820.63	1770.58	2895.11	4404.83	4345.9	3703.05	5828.74	2128.63	2642.9	3260.01	5472.41	1590.17	1223.14	3913.53	3987.92
Mtx3	190.509	-0.626665	0.220679	-2.83971	0.00451548	0.0341811	160.876	206.155	198.566	273.293	235.841	131.099	167.428	157.812	205.658	138.964	202.007	163.546	235.249	226.064	190.211	155.38
Serpinb6a	11911.9	0.63323	0.223014	2.83942	0.00451952	0.0341935	18432.5	12373.8	11852	10739.7	9434.48	15895.5	11844.2	13077.9	12294.1	6431.14	10143.4	14650.1	9584.44	10934	10954.9	11947.7
Aes	10068.4	0.429113	0.151164	2.83873	0.00452932	0.0342314	11532.6	13682.1	8269.11	7493.16	8812.12	11817.5	9527.08	12392.9	9603.92	9254.19	7839.52	10508.1	9269.76	9530.29	10888.5	10673.1
Spaca6	201.361	-0.857951	0.302215	-2.83888	0.00452723	0.0342314	120.39	151.186	167.57	305.268	196.59	138.259	260.969	150.088	313.658	310.735	208.118	148.714	260.128	247.259	135.795	107.056
Gm12397	38.7182	-1.42118	0.500815	-2.83773	0.0045435	0.0343204	4.73163	44.1761	31.5032	63.2705	55.4919	78.6596	43.4406	30.7093	18.6962	32.2235	25.8381	19.4425	34.8517	48.8563	35.062	52.5384
Elf2	1468.53	-0.378762	0.133516	-2.83682	0.00455652	0.0344005	1234.47	1291.25	1411.17	1736.94	1845.08	1513.12	1473.45	1201.21	1492.9	1371.23	1698.5	1489.32	1521.87	1367.28	1360.58	1488.17
Samd10	821.178	-0.545244	0.192227	-2.83647	0.00456159	0.0344206	617.074	760.013	688.337	991.622	1144.15	645.395	742.302	796.874	1309.03	919.677	796.132	692.456	943.334	704.061	770.401	617.992
Atl3	2934.85	-0.457015	0.161296	-2.8334	0.00460558	0.0345815	2547.89	2771.25	2836.87	4092.25	3000.25	1995.96	3144.88	2649.87	3011.51	3587.59	3485.96	2464.48	3426.33	3088.93	2846.06	2007.53
Casp2	1186.43	-0.366785	0.129463	-2.83312	0.00460958	0.0345815	1013.75	1081.06	1004.44	1239.29	1369.25	1372.96	1127.98	967.049	1298.56	1345.14	1612.46	965.973	1189.98	1038.65	1143.72	1212.59
Chmp2a	1726.53	0.845126	0.298146	2.8346	0.00458828	0.0345815	3578.69	1227.87	1670.62	1279.47	1451.11	1385.28	2530.42	1717.16	1505.53	1603.12	1666.56	1948.82	1299.81	1407.72	1466.47	1885.79
Erp44	1930.02	0.669062	0.236145	2.83327	0.00460744	0.0345815	3326.92	2154.97	1863.41	1984.14	1489.16	2687.73	1865.78	2041.07	1650.77	1245.47	1716.73	2144.96	1250.43	1664.78	1833.19	1960.75
Gm2000	4524.28	0.556429	0.196338	2.83405	0.00459628	0.0345815	4461.93	5478.96	4555.55	3652.99	3941.78	6896.91	3877.08	6534.26	3288.56	4341.11	2747.06	5294.08	3485.96	3761.93	4415.18	5655.14
Lrig2	448.307	-0.636082	0.224483	-2.83354	0.00460354	0.0345815	373.799	288.843	420.042	645.887	444.86	285.141	479.657	339.509	590.405	380.64	453.342	434.597	691.49	581.307	447.04	316.348
Muc3	36.7499	4.03073	1.42239	2.83377	0.00460021	0.0345815	407.056	0	6.62433	26.6817	0	5.89625	13.9555	10.0725	26.5578	5.09585	37.6413	30.8671	0.610703	7.66141	7.39297	1.88561
Psmb4	4668.22	0.446339	0.157509	2.83374	0.00460067	0.0345815	5782.05	5564.64	4863.19	3786.08	4049.82	4215.68	3945.43	6045.07	3715.92	3967.22	4499.66	5150.67	4624.04	4150.53	4372.9	5958.55
Tmc8	278.077	0.924621	0.326342	2.83329	0.00460713	0.0345815	691.335	192.873	245.808	185.19	195.89	263.643	217.996	297.173	326.474	289.941	359.894	292.516	290.56	191.069	213.887	194.981
Vps13d	2776.56	0.777975	0.274496	2.83419	0.00459418	0.0345815	4972.26	2073.75	3234.49	2272.81	2640.13	2736.76	3217.24	3570.24	2509.88	1436.18	3107.61	3320.51	2005.68	2354.77	2957.23	2015.44
Zfp110	1275.19	-0.593771	0.209533	-2.83378	0.00460014	0.0345815	928.854	976.806	1188.18	1394.31	1765.12	890.307	1449.22	1003.73	1904.5	1507.58	1020.5	1150.34	1495.05	1334.79	1484	909.705
Nek2	579.392	1.17006	0.41302	2.83293	0.00461232	0.034584	556.407	900.95	910.52	265.927	129.284	860.125	404.308	699.142	456.062	589.509	404.195	779.415	508.941	593.147	561.741	650.603
Dclk1	281.424	-2.84423	1.00424	-2.83223	0.0046225	0.0345875	0	591.479	425.654	199.672	249.944	9.87578	207.594	42.3824	225.261	804.404	559.932	55.0944	255.321	247.845	368.355	259.969
Lamc2	18165.2	0.722244	0.255001	2.83231	0.00462125	0.0345875	19174.7	17321.2	20836.9	12712.1	13380	20303.9	19893.2	20609.4	16428.8	10297.3	24380.3	20706.1	10575	19269	19671.3	25084.5
Mrpl10	1694.41	0.306371	0.108158	2.83262	0.00461687	0.0345875	1880.1	1800.5	1780.6	1505.21	1592.2	2032.88	1639.57	1851.8	1480.63	1288.18	1521.19	2009.2	1544.98	1644.62	1856.02	1682.95
Nudt2	501.626	0.549003	0.19383	2.8324	0.00462003	0.0345875	488.936	617.332	551.783	455.196	422.663	652.219	445.267	675.605	443.788	294.039	335.896	613.011	340.596	485.251	538.201	666.232
Kif18b	456.171	1.2159	0.429474	2.83113	0.00463833	0.0346878	406.023	780.796	636.441	172.358	109.168	584.117	233.832	576.746	381.363	522.588	349.964	564.031	383.296	530.098	464.888	603.031
1810011O10Rik	643.834	-1.50838	0.532962	-2.83019	0.00465208	0.0347724	335.946	239.004	343.671	1891.96	1388.22	938.452	709.531	492.202	770.479	382.654	219.624	563.832	681.985	430.598	447.04	466.139
Cdc23	1265.51	-0.404689	0.143051	-2.82898	0.00466961	0.0348122	1115.77	1454.92	1293.94	1288.52	1610.12	1353.33	1162.5	1034.75	1368.16	1196.11	1013.32	1044.41	1330.09	1374.43	1355.18	1252.61
Iqgap3	1009.22	1.25571	0.443789	2.82952	0.00466177	0.0348122	938.6	1743.4	1716.98	504.079	207.589	1173.8	581.771	1443.98	779.802	837.308	894.253	1285.6	824.219	846.874	849.953	1519.4
Nek7	3890.8	-0.65709	0.232259	-2.82912	0.00466763	0.0348122	2827.49	3551.93	4294.72	5404.7	3844.64	1880.16	3322.07	2777.72	4971.11	5363.72	6155.53	2976.1	4282.39	4644.54	3468.76	2487.15
Pcdhgb4	14.4661	-3.39274	1.19926	-2.82904	0.00466876	0.0348122	3.44576	3.85996	5.21406	40.3901	8.66705	32.5752	8.8974	4.65911	1.07489	35.1728	12.8293	2.49861	63.2929	4.52276	1.91501	2.44216
Spry1	733.681	0.584229	0.20651	2.82905	0.00466857	0.0348122	769.85	836.232	769.525	770.648	432.703	874.008	581.05	871.622	785.252	748.493	710.039	939.276	518.978	686.786	719.953	724.482
Olfr1396	18.326	4.84806	1.71486	2.82708	0.00469742	0.0349834	257.565	0	0	2.80663	2.21542	0	1.44524	0.68112	3.92848	4.02021	7.2375	0	3.79471	2.64475	4.19936	2.67766
Rsph9	267.235	-0.888842	0.314403	-2.82708	0.00469747	0.0349834	201.622	110.201	305.615	387.737	417.698	247.23	275.324	140.743	374.552	296.191	337.527	236.849	265.342	231.03	218.798	229.293
Col8a1	31.1713	4.26924	1.51031	2.82674	0.00470248	0.0350024	7.88606	23.7871	21.9568	2.63627	3.69946	26.2199	25.3404	0.853037	0.984009	6.04191	169.122	189.85	3.96042	5.79651	6.13584	4.47135
Crbn	777.301	-0.520208	0.184115	-2.82546	0.00472135	0.0351246	742.568	639.863	757.373	991.91	954.011	541.329	882.051	661.564	1014.69	610.352	859.354	638.537	979.52	886.838	781.743	495.12
Cyp1a2	8.93209	-4.61817	1.63489	-2.82476	0.00473158	0.0351824	1.57721	0	0.954642	35.1503	11.0984	0	20.8153	0	38.3763	9.06286	1.17446	1.14368	14.2575	5.79651	3.5062	0
Txndc15	1168.51	-0.527625	0.186885	-2.82325	0.00475391	0.03533	1190.79	1107.8	1138.89	1178.41	1554.7	746.173	1271.54	882.893	1429.76	1227.51	1330.66	873.769	1508.92	1142.74	1108.83	1002.7
Akap8	996.099	-0.76473	0.270909	-2.82283	0.00476016	0.0353396	518.903	1190.49	985.19	1309.35	1241.17	837.943	1134.89	1080.8	1097.17	1175.15	797.458	579.844	1161.2	953.94	1053.61	820.493
Tnrc6c	1315.43	-0.657235	0.232827	-2.82284	0.00475997	0.0353396	1360.7	963.978	1079.77	1819.97	1574.67	1096.3	1519.32	759.305	1652.77	1178.94	1201.13	1094.39	1665.32	1561.84	1295.01	1223.43
Clmn	6540.47	-0.954521	0.338459	-2.82019	0.00479947	0.0355944	6513.93	3641.54	4844.36	9788.81	7684.85	5446.33	7573.39	2598.52	10602.3	7103.98	6030.73	4331.12	8569.17	8260.29	8062.35	3595.9
Dcaf7	5227.88	-0.189	0.0670139	-2.8203	0.00479784	0.0355944	5246.8	5250.26	4943.96	5810.58	5818.7	5364.12	5305.72	4928.52	4854.08	4710.74	4695.9	4992.38	5653.94	5666.66	5269.39	5134.35
A430033K04Rik	173.835	-0.800555	0.283891	-2.81994	0.00480325	0.0356039	114.524	162.244	161.426	237.75	199.628	93.4546	168.337	119.638	285.802	194.316	142.867	145.372	224.12	200.459	214.669	116.749
Slc6a6	16978.8	-1.21304	0.430322	-2.81892	0.00481858	0.035699	13551.4	14743.5	14062.8	45812.2	18590.7	17261.4	16960	8163.56	25403.2	11129.2	9589.47	11968.6	13681.7	19857.2	14998.6	15887.8
Hint1	4449.58	0.693639	0.246132	2.81816	0.00483003	0.0357653	8918.14	5504.95	4856.72	3563.32	3679.15	4356.06	3841.57	5163.78	2958.39	3090.13	3938.4	4469.31	4223.97	3557.83	3884.07	5187.56
Akr1a1	21332.2	0.587095	0.208438	2.81665	0.00485275	0.0359149	29347.1	24381.1	21860.2	17906.3	20049.9	22871.4	22014.9	25073.2	23462.8	13174.9	19271.9	22711.2	13388.1	20761.2	21540.5	23500.7
Rfc5	1027.43	0.743052	0.263827	2.81644	0.00485598	0.0359202	1154.01	1524.5	1416.6	715.854	652.766	1126.49	652.976	1309.43	1008.12	639.691	746.034	1170.8	803	1160.17	1098	1260.44
Tubb4a	75.067	-2.27557	0.808191	-2.81564	0.00486805	0.0359908	6.30885	355.674	19.0928	75.5731	94.3363	166.059	54.3008	7.67733	4.92004	34.2375	52.8507	28.5919	37.228	45.544	9.64204	209.036
Kif20a	1724.16	1.17502	0.417356	2.81539	0.00487181	0.0359999	1543.47	3208.95	2910.34	685.61	390.441	1965.44	1052.17	2022.57	1465.63	1538.3	1516.6	2022.81	1398.81	1863.97	1728.58	2272.95
AC182748.1	85.7368	-0.729215	0.25921	-2.81322	0.00490475	0.0360232	52.048	87.2194	105.011	108.087	110.984	46.9772	98.6465	71.6551	91.5128	91.6356	81.0377	64.0459	95.8422	111.79	81.5191	73.7773
Atp5e	2239.75	0.49852	0.177201	2.8133	0.00490357	0.0360232	2963.85	2495.12	2402.94	1858.36	1774.81	2201.11	1891.43	2585.63	2709.79	2392.97	1779.76	2520.72	2076.97	1730.9	2145.11	2306.58
Ccl28	787.946	1.98532	0.70567	2.81338	0.00490238	0.0360232	3471.44	251.464	579.468	205.629	180.349	506.917	1134.89	592.007	244.034	737.112	926.649	1410.15	995.65	685.644	428.632	257.103
Chd3	7462.39	-0.930916	0.330931	-2.81303	0.00490778	0.0360232	2755.12	6572.19	6046.21	6070.23	9537.36	6846.11	7989.6	5931.58	9193.55	12443.1	6515.55	6063.19	12518.1	7493.54	7197.96	6224.83
E2f7	241.203	1.34802	0.479145	2.8134	0.00490214	0.0360232	412.72	442.094	430.142	153.976	73.3136	245.682	128.597	258.928	138.839	161.02	248.072	290.58	149.247	333.745	147.909	244.389
Eci2	1265.32	-0.382717	0.136023	-2.81362	0.00489866	0.0360232	1039.2	1456.95	1106.56	1524.33	1408.04	1148.08	1063.7	1276.96	1379.41	1157.6	1233.43	1195.93	1654.18	1233.98	1135.62	1231.12
Fggy	274.215	-1.67017	0.593511	-2.81405	0.00489222	0.0360232	11.8557	271.028	344.237	470.58	412.401	309.268	309.406	191.307	256.62	252.508	417.293	139.178	225.32	161.708	237.139	377.592
Lfng	727.519	-1.54693	0.54982	-2.81352	0.00490028	0.0360232	118.291	565.227	579.468	1682.82	1406.72	207.574	788.267	754.084	716.358	587.072	830.343	440.315	753.272	634.304	738.931	837.261
Pot1b	85.7368	-0.729215	0.25921	-2.81322	0.00490475	0.0360232	52.048	87.2194	105.011	108.087	110.984	46.9772	98.6465	71.6551	91.5128	91.6356	81.0377	64.0459	95.8422	111.79	81.5191	73.7773
Slc2a2	10.754	-4.88431	1.7362	-2.81322	0.00490486	0.0360232	0	3.63037	0	15.7402	25.5125	3.01366	2.90057	0	10.4502	1.87513	3.23976	1.83274	18.5703	69.6696	4.83595	10.7925
Tnxb	187.908	-3.4363	1.22152	-2.81314	0.00490606	0.0360232	7.66632	5.50579	15.0723	473.385	147.251	87.4148	616.828	34.87	1046.49	263.881	29.0403	26.5628	131.865	42.2625	57.6625	20.7702
Trim39	440.587	-0.512237	0.182062	-2.81353	0.00490014	0.0360232	343.366	356.363	394.72	529.261	602.098	460.329	407.463	471.681	469.139	541.559	368.249	357.45	546.519	379.748	415.358	406.094
Zfp280b	448.941	0.837316	0.297646	2.81313	0.0049062	0.0360232	722.363	488.202	548.919	258.355	280.234	411.87	394.586	458.081	293.235	407.829	649.476	510.08	405.547	480.282	439.151	434.839
Gnaq	2482.6	0.80067	0.284667	2.81265	0.00491347	0.0360464	5266.67	1954.1	2079.48	1901.39	1575.87	2283.9	2025.87	2754.72	1956.2	2801.37	3060.83	2761.97	2709.84	2346.86	2394.81	1847.79
Homez	665.393	-0.897527	0.31914	-2.81233	0.00491844	0.0360643	300.864	462.777	449.046	803.632	1168.33	536.209	739.011	544.594	1256.46	810.845	794.574	502.566	541.938	604.764	639.353	491.327
Cnksr1	1535.58	0.730286	0.259781	2.81117	0.00493622	0.0361762	2820.37	1434.05	1589.21	1341.35	1323.62	1580.47	1518.46	1603.11	1479.03	857.853	1681.96	1789.05	1077.26	1491.27	1333.22	1649
Rhot1	1121.53	-0.429388	0.152785	-2.8104	0.00494803	0.0362441	797.961	1151.01	1124.19	1407.35	1358.28	1096.83	1130.89	1063.82	1244.58	917.2	1061.29	1061.67	1179.17	1197.9	1137.89	1014.39
Tnfrsf22	844.137	1.24694	0.443899	2.80906	0.0049687	0.0363768	748.156	785.294	602.258	485.018	497.406	1347.32	737.057	1117.65	1166.36	646.793	534.445	1439.04	410.817	897.974	1617.83	472.768
Pradc1	174.93	0.825241	0.293865	2.80823	0.00498147	0.0364516	241.061	246.912	194.796	142.244	85.9917	186.998	143.065	224.078	162.557	179.549	116.802	229.846	163.648	111.094	183.669	186.571
Anxa10	1172.36	2.51175	0.894608	2.80765	0.0049904	0.0364678	5161.14	4147.52	824.923	68.3902	271.403	2041.86	919.844	538.206	216.122	487.187	552.515	764.99	793.349	429.34	1190.62	350.356
Eif3a	6812.82	-0.368635	0.131299	-2.80759	0.00499136	0.0364678	6035.99	6903.93	6529.75	9406.22	7156.61	6711.19	6749.59	5971.26	6707	7209	7069.08	6092.36	6806.38	7315.19	6503.12	5838.47
Mybpc2	13.6327	-4.13029	1.47105	-2.80772	0.00498934	0.0364678	0	6.79632	1.90928	97.542	20.347	7.64746	22.6253	2.55911	14.7601	14.0978	0	4.57471	11.0892	12.4211	1.7531	0
Casp12	335.908	-2.27397	0.810217	-2.80661	0.00500652	0.0365599	18.837	126.552	321.177	972.299	650.2	51.775	499.063	285.676	117.696	120.244	899.767	108.423	381.009	465.293	244.118	112.405
A530054K11Rik	572.281	-0.846406	0.301604	-2.80635	0.00501068	0.0365716	392.726	327.356	395.222	1053.63	911.917	474.142	649.8	546.796	651.414	423.94	660.047	483.775	597.232	727.048	561.868	299.581
Ube2k	412.485	-0.804341	0.286737	-2.80516	0.00502922	0.0366881	373.799	367.001	363.719	609.857	420.814	323.378	346.62	279.796	305.043	665.617	443.946	304.218	638.42	502.64	362.015	292.874
Cyb5d1	357.864	-0.743161	0.265001	-2.80436	0.00504158	0.0367595	303.419	442.7	307.527	481.047	538.256	298.271	362.485	202.201	441.949	259.218	353.529	324.425	366.47	391.374	326.806	326.142
Tjp2	5938.52	0.635753	0.22677	2.80352	0.00505487	0.0368375	10258.2	6768	5032.87	5184.67	4997.97	6571.35	4722.36	7305.41	4250.92	7383.21	5851.16	6217.02	5120.03	5175.45	5259.29	4918.49
Gltp	4804.84	0.926862	0.330801	2.80187	0.00508075	0.0370073	10555.9	4322.2	5388.03	3187.3	2560.35	3711.64	4572.5	4102.66	5885.38	3783.1	5499.96	5273.01	4733.52	4010.13	4891.35	4400.47
Nsun6	191.953	0.926883	0.330831	2.80168	0.00508374	0.0370101	306.646	199.046	217.333	152.051	118.987	152.021	162.9	211.948	266.895	144.323	185.187	255.801	135.047	109.274	261.655	192.13
Fam168a	1798.43	-0.660927	0.235944	-2.8012	0.00509135	0.0370466	921.873	1796.36	1535.92	1766.92	2138.19	1685.61	1885.39	1380.12	2107.09	2803.72	1610.96	1434.55	2008.4	2226.41	2021.04	1452.38
Gpt2	654.086	1.34868	0.481534	2.80079	0.00509782	0.0370748	830.719	345.465	565.459	398.114	391.254	1704.62	371.95	502.074	558.741	511.552	455.686	1381.73	275.662	394.427	707.594	1070.33
Ube2q1	1073.04	-0.422806	0.150977	-2.80047	0.00510278	0.037092	1047.27	1021.71	859.178	1152.93	1361.4	1124.18	1118.6	949.43	886.592	1151.99	1125.13	862.332	1314.86	1031.78	1094.81	1066.42
Mapk9	963.484	-0.474248	0.169375	-2.79999	0.00511048	0.0371291	735.44	1039.2	899.099	1359.9	992.074	1070.57	1049.2	772.436	849.876	986.99	703.277	931.92	1039.73	965.139	959.752	1061.14
Slc22a5	1179.43	-0.654598	0.233836	-2.7994	0.00511984	0.0371781	813.004	1345	1105.44	1229.8	1416.33	742.095	1380.95	947.381	1831.93	1196.29	1161.84	827.369	1429.18	1256.08	1225.86	962.342
Adap1	1741.16	0.764128	0.272978	2.79923	0.00512247	0.0371783	3760.08	1752.56	1944.77	1442.14	1240.43	1717.6	1683.1	1786.97	1588.35	1323.82	1538.13	1953.25	1728.9	1209.36	1556.93	1632.25
2700094K13Rik	1017.73	0.98506	0.352025	2.79827	0.0051377	0.0372699	632.299	1561.06	1278.83	461.396	560.549	1166.7	713.489	1677.26	646.63	1068.24	843.755	1300.71	803.425	934.094	1082.61	1552.62
Rpl15	16157.7	0.562283	0.200978	2.79773	0.00514633	0.0373135	13728.2	20155.1	14129.3	11640.4	13178	24154.6	16806.6	20660.4	17379.7	14297.2	11318.1	19987.3	12010.2	12374.4	15035.5	21668.3
Pzp	238.105	-3.95046	1.41225	-2.79727	0.00515357	0.037347	2.90372	60.4686	50.5249	361.585	263.921	1459.22	154.121	3.9262	629.532	208.098	2.16223	45.2695	181.218	131.871	169.445	85.4066
Tnfsf12Tnfsf13	225.053	-1.37002	0.489827	-2.79696	0.00515867	0.037365	86.5046	288.541	280.861	157.201	196.516	187.617	222.366	95.8731	89.3592	280.202	375.527	121.853	432.841	240.296	175.443	369.839
Ly6g6c	21.4205	2.67079	0.955197	2.79606	0.00517296	0.0374495	129.483	5.59954	9.60207	16.6142	3.81002	1.80023	38.4007	18.5923	23.5112	7.46696	35.9858	16.2172	5.4592	14.3513	9.38854	6.44697
Rbm15	389.716	0.734074	0.262557	2.79587	0.00517609	0.0374532	548.87	388.523	316.941	333.928	311.68	436.998	380.106	496.467	391.635	205.425	485.052	459.758	259.012	385.054	349.743	486.26
Aqr	2392.98	-0.537439	0.192259	-2.79539	0.00518365	0.0374888	1957.19	2896.71	2467.16	2648.77	2691.29	1799.32	2355.11	1588.14	2307.09	3005.18	2265.57	2031.3	2749.84	2184.62	2586.41	2753.92
Lct	8.92431	-3.5124	1.25675	-2.79483	0.00519276	0.0375357	2.18404	1.56853	9.38073	60.4455	3.84211	2.26924	26.6792	3.54372	2.0439	2.78884	4.06582	0	8.22627	1.72001	8.61335	5.41773
Jam3	5.9845	-3.81781	1.3663	-2.79427	0.00520166	0.037581	0	3.23506	1.36324	33.5316	18.0376	0	3.83706	0.723338	1.40517	10.7367	10.9548	2.90936	2.68661	2.10651	4.22482	0
Vezf1	1266.99	-0.765155	0.273899	-2.79357	0.00521297	0.0376437	632.097	733.339	1040.66	2145.74	1645.12	1117.7	1336.4	1237.42	1626.54	1242.31	1321.7	1160.21	1365.31	1461.16	1304.51	901.61
Ly6g	1183.97	4.03171	1.44351	2.793	0.00522213	0.0376908	2179.79	134.227	1295	13.0166	9.1325	30.8749	122.932	1302.59	109.442	549.888	10851.4	747.562	235.404	385.002	471.804	505.458
Ifrd1	1804.69	0.982143	0.351824	2.79158	0.00524516	0.0378378	3814.42	1200.5	2072.51	1637.53	1067.31	2610.38	1395.26	1983.74	920.754	1205.86	1850.57	2455.51	1471.87	1377.74	1854.65	1956.41
Rdh1	22.6498	-2.65185	0.95026	-2.79066	0.00526014	0.0379267	9.46327	5.6636	30.5485	36.9078	6.47406	13.1099	16.2902	9.3834	14.7601	28.1956	17.6169	9.14941	132.278	17.3895	1.7531	13.4141
Lyplal1	264.147	-0.923973	0.331182	-2.78993	0.00527194	0.0379926	123.511	204.283	181.747	283.296	292.957	320.2	264.047	156.59	490.068	310.53	202.749	211.831	360.315	258.638	247.338	318.251
9330182L06Rik	19.9395	3.47041	1.2442	2.78928	0.00528256	0.0380174	157.323	7.70299	41.9851	6.92434	3.0609	1.20523	2.9952	4.7053	7.84752	2.22179	11.1175	15.6594	6.08472	9.06828	21.4279	19.704
Calm1	22419.8	0.867413	0.310987	2.78923	0.00528338	0.0380174	47046.9	25898.6	22209.8	13979.5	14849.8	22485.9	17035.7	19997.8	17248.3	22920.5	24278.1	23556.9	20828.9	18481.8	27239	20659.7
Wrb	543.961	-0.699858	0.25089	-2.78951	0.00527885	0.0380174	307.556	695.49	611.925	636.22	826.83	783.318	575.589	417.988	403.444	423.94	509.716	528.378	578.222	433.082	461.941	509.734
Ddx49	1432.95	0.452367	0.162196	2.78902	0.00528684	0.0380231	1807.69	1431.19	1391.02	1237.03	1182.37	1508.78	1556.45	1821.3	1353.15	1333.4	986.394	1625.73	1420.97	1152.99	1439.64	1679.06
Zic2	124.021	13.6158	4.88279	2.78852	0.00529496	0.0380624	1.56922	415.345	207.058	0	0	0	0	0	0	697.997	451.046	0	0	0	0	211.314
Gm3272	101.88	1.18451	0.424934	2.78752	0.00531133	0.0381608	126.177	57.7687	107.875	44.8166	46.2433	194.464	109.507	118.572	60.0245	97.6775	86.91	173.839	92.6739	110.134	101.68	101.723
Angel2	998.524	-0.406785	0.145949	-2.78718	0.00531689	0.0381661	865.851	1204.99	991.706	1071.11	1171.03	985.857	1054.93	714.983	963.717	1004.97	809.853	976.789	1141.81	1020.49	915.343	1082.97
Anp32e	1948.55	0.627683	0.225229	2.78687	0.00532202	0.0381661	1896.78	2112.79	2635.29	1390.78	1198.13	2477.35	1497.03	2446.19	1638.35	1509.62	1411.73	2547.01	1871.03	2034.04	2199.54	2311.22
Eml5	52.2812	-1.03751	0.372325	-2.78657	0.00532695	0.0381661	31.5442	24.9198	50.596	75.5731	76.7638	19.6649	47.0607	39.2397	60.0245	76.5308	39.9316	34.3103	64.9509	97.7126	67.4943	30.1816
Gm28036	926.41	-0.517349	0.185651	-2.78667	0.0053252	0.0381661	840.337	881.691	865.117	1269.18	960.757	1001	973.097	582.016	924.436	1159.28	1041.19	749.543	873.06	877.699	804.174	1019.97
Mlycd	444.946	-0.537354	0.192842	-2.7865	0.00532812	0.0381661	486.324	439.625	298.334	562.766	589.151	546.567	381.015	395.142	446.72	440.399	392.923	360.472	645.43	318.541	430.629	385.098
Rph3al	642.5	0.662767	0.237795	2.78713	0.00531768	0.0381661	471.606	578.091	659.106	380.729	292.742	591.109	802.692	649.442	901.518	859.01	764.832	768.311	520.972	810.944	594.116	634.786
1810010H24Rik	95.5006	-1.64752	0.591709	-2.78434	0.00536363	0.0384013	81.2359	53.1559	42.787	135.784	94.2137	64.2185	59.0277	57.6057	147.672	182.025	32.2623	41.8889	333.712	80.5625	84.756	37.1041
Igsf1	12.1002	-5.21592	1.87372	-2.78373	0.00537374	0.0384543	0	12.8813	19.3562	3.98016	31.8606	68.8849	7.48317	0	10.7693	5.23214	3.41374	1.46847	14.8174	0	13.4557	0
Dph3	929.386	0.435524	0.156463	2.78355	0.00537672	0.0384563	1026.64	1125.25	911.891	785.064	805.713	1048.82	928.282	1039.13	973.648	829.879	868.396	1085.05	739.545	644.063	990.484	1068.33
Ywhaq	15927.1	-0.666263	0.239436	-2.78263	0.00539198	0.0385462	9387.46	17439.5	14606.2	22255.3	21364.7	11307.5	18116.9	14792.7	16271.7	14622.5	14101.2	12710.6	14930.9	15363.6	21498.2	16064.7
Vmn2r114	18.6408	5.30326	1.90607	2.78231	0.00539741	0.0385657	22.081	37.3797	26.73	0	1.84973	0	19.9103	21.3259	39.3603	0	0	27.4482	0	42.2317	54.346	5.58919
Bphl	588.961	-0.952086	0.342224	-2.78206	0.00540156	0.038576	299.67	534.644	470.638	767.155	841.627	762.561	587.354	431.637	914.144	527.66	281.87	487.206	751.688	493.531	613.584	658.407
[truncated: 19,920 more rows]

## Sheet: DE_G12CvsWT_results
Gene	baseMean	log2FoldChange	lfcSE	stat	pvalue	padj	MZ110	MZ222	MZ248	MZ392	MZ394	MZ517	MZ521	MZ572	MZ585	MZ698	MZ753	MZ831	MZ838	MZ89	MZ983	MZ988
							G12D	G12C	G13D	WT	WT	G12C	G13D	G12D	G12R	G12R	G12R	G12D	WT	G13D	G13D	G12C
Reg1	1524.45	-27.5507	2.4668	-11.1686	5.81013e-29	8.29048e-25	460.546	0	1225.76	2364.74	0	0	5383.02	787.353	1970.97	206.432	1912.02	0	6030.14	1907.05	2143.16	0
Cdkn3	99.8877	2.55918	0.303013	8.44577	3.02059e-17	2.15504e-13	137.217	164.244	117.421	30.7565	24.9714	120.174	66.066	139.898	88.5608	97.6775	68.1187	173.839	20.5942	85.2915	99.05	164.322
Gm8624	271.248	1.41737	0.169331	8.37042	5.74156e-17	2.73088e-13	307.556	455.353	217.658	192.448	173.875	560.449	193.673	347.186	206.642	181.257	212.577	336.241	169.506	163.958	206.866	414.718
Etv5	393.886	3.61616	0.45145	8.0101	1.14611e-15	4.08846e-12	327.731	742.04	379.938	117.103	83.0731	1185.82	175.636	586.126	101.33	95.2878	132.382	915.648	36.0066	205.882	282.66	935.504
Kansl1l	578.757	-2.48212	0.314987	-7.8801	3.27126e-15	9.33553e-12	188.226	192.763	508.129	1863.73	954.954	230.108	668.844	319.917	488.765	476.265	605.725	365.434	869.244	724.94	565.805	237.259
Rpl27	4617.48	0.702003	0.0899275	7.80633	5.8879e-15	1.40024e-11	5234.1	5861.01	4254.41	3823.34	4024.2	6180.49	4051.28	5882.29	3397.82	3484.03	3726.96	5910.68	3543.27	3849.07	4171.18	6485.55
Tubb6	2445.46	2.00054	0.263451	7.5936	3.11136e-14	6.34229e-11	2473.07	3204.46	3065.36	1053.63	992.381	4947.9	1713.19	4413.61	1136.53	1301.02	1398.78	3976.56	1040.01	1915.33	2299.19	4196.37
Nphs1	1227.51	1.11636	0.151099	7.3883	1.48719e-13	2.6526e-10	1414.82	1718.41	1031.06	979.855	875.883	2283.41	981.98	1543.9	719.34	822.74	716.45	1738.46	953.709	792.498	978.269	2089.33
Zfp53	100.82	-9.56021	1.29838	-7.36316	1.79605e-13	2.84754e-10	138.795	0	108.829	202.114	109.134	0	117.652	105.777	113.161	169.173	115.097	18.2988	152.872	147.397	114.828	0
Mfsd2a	292.858	2.35538	0.32343	7.28252	3.2763e-13	4.24996e-10	466.199	387.326	441.691	51.4643	89.1096	333.325	273.025	562.764	150.234	153.742	82.0948	474.257	94.2731	250.165	393.87	482.196
Rplp0	60867.4	0.950047	0.130343	7.28884	3.12646e-13	4.24996e-10	73465.6	77465.5	55809	39772.4	47472	91780.2	59349.3	83859.3	44181.2	43421.9	38573.7	75702.7	42656.1	51426.1	67230.5	81712.5
Ccnd1	18662.2	1.61569	0.223851	7.2177	5.28756e-13	6.28735e-10	19107.6	33603.3	18165.6	10379	9000.86	29924.1	17076	18672.4	16826.2	19545.6	10506.5	27186.2	10182	16073.4	15277.8	27068.6
Etv4	367.922	3.3825	0.46988	7.19864	6.0817e-13	6.67536e-10	194.287	631.019	362.619	46.5056	92.4266	804.514	208.15	719.445	120.966	272.937	308.059	734.548	70.1674	265.195	315.975	739.935
Anxa2	69356.2	1.21241	0.172875	7.01322	2.32888e-12	2.37363e-09	79245.9	87292.2	69719.4	43421.4	47188.5	126213	66221.2	82115.1	63755.2	48597.3	54501.4	91723.5	41521.8	52545.8	62963.6	92674.3
Abcg1	74.6071	-4.84894	0.695105	-6.97584	3.04047e-12	2.71153e-09	1.47625	8.4817	18.4918	160.389	415.518	9.20305	39.8128	26.3483	80.1288	35.816	83.9188	5.35234	205.363	51.3346	42.6629	9.41655
S100a4	231.649	2.42431	0.347403	6.97837	2.98628e-12	2.71153e-09	240.116	524.294	243.675	72.7746	59.7854	227.79	242.031	377.03	98.8011	92.7916	172.967	355.7	94.0572	206.367	232.099	466.112
Rpl13a	4674.49	1.47015	0.211441	6.95301	3.57575e-12	3.00132e-09	3949.34	7076.1	4446.72	2368.25	3098.3	8595.74	4235.46	7049.49	2795.57	3245.51	2944.37	6177	2621.01	4151.13	5304	6733.86
Pcsk9	4940.3	3.14808	0.460087	6.84235	7.79018e-12	5.85043e-09	8020.12	7139.53	8001.81	842.728	700.123	10811.3	3955.81	4615.78	2436.41	2652.4	701.153	6112.95	1657.83	4628.93	6341.83	10426.1
Trib2	303.689	3.20932	0.468595	6.84881	7.44676e-12	5.85043e-09	255.508	274.118	195.702	28.999	18.4973	274.216	518.573	602.244	429.028	302.095	357.036	686.206	42.7725	182.176	402.336	289.52
Pycr1	346.847	2.13114	0.317081	6.72111	1.80339e-11	1.28663e-08	332.196	458.373	276.981	131.998	140.924	774.85	285.454	641.114	175.812	316.163	221.462	709.97	119.551	229.846	250.373	484.485
Il1a	2565.14	3.90206	0.586917	6.64839	2.96316e-11	2.0134e-08	5159.06	2795.55	1668.71	183.66	361.622	7657.29	1441.69	6868.65	366.051	255.774	1356.5	8856.63	278.022	1085.6	852.882	1854.49
Zfp866	338.74	-0.952963	0.144903	-6.57657	4.81419e-11	3.12244e-08	237.442	211.28	311.008	408.528	446.374	227.378	374.192	303.461	431.992	451.037	420.456	230.945	412.932	372.703	364.13	215.983
Sec61b	2149.3	0.97926	0.149797	6.53724	6.26644e-11	3.88765e-08	2806.14	2690.19	2443.87	1388.42	1673.59	3149.04	2205.49	2383.01	1745.03	1382.9	1510.21	2538.13	1395.2	1826.35	2304.87	2946.29
Lmod3	11.4756	-18.473	2.83588	-6.51402	7.31641e-11	4.17591e-08	0	0	0.954642	7.90881	1.84973	0	0.905014	0	0	0	0	170.408	1.58417	0	0	0
Prpf4b	413.896	-1.42786	0.219016	-6.51941	7.05841e-11	4.17591e-08	290.207	250.331	388.539	681.037	487.404	178.077	396.396	353.157	563.837	520.611	663.57	215.011	632.875	406.584	353.249	241.453
Cdca8	1060.61	1.95038	0.31019	6.28771	3.22185e-10	1.76818e-07	1191.22	1787.45	1517.99	498.916	278.519	1748.35	654.745	1594.1	724.333	618.397	854.015	1640.89	508.857	889.419	1027.73	1434.8
Morc4	499.825	2.76995	0.444182	6.23607	4.48701e-10	2.33816e-07	443.314	708.601	540.774	62.3961	135.009	1047.63	485.559	994.191	198.289	325.412	320.455	1414.62	132.927	276.392	416.903	494.74
Spred1	922.174	0.907663	0.145632	6.23258	4.58816e-10	2.33816e-07	708.545	1158.21	968.619	658.523	561.8	1200.58	978.832	990.059	1013.64	949.215	814.235	939.396	618.847	1071.25	1031.11	1091.91
Oat	2253	1.39122	0.224287	6.20284	5.54538e-10	2.72852e-07	2389.48	4280.55	2595.67	1104.6	1255.04	3145.29	1813.65	2461.01	1311.68	2023.03	1866.22	2506.94	1741	2048.65	2172.97	3332.28
Gm4294	121.678	-22.0344	3.5584	-6.19222	5.93243e-10	2.82166e-07	141.949	0	191.883	0	0	0	495.947	0	0	0	179.692	320.229	151.288	247.594	218.261	0
Micall2	3673.82	0.635035	0.103218	6.15234	7.63458e-10	3.51412e-07	5502.62	3808.1	3643.44	2460.94	2799.79	4300.74	3732.82	4848.34	2988.7	3015.47	3344.91	4675.32	2536.39	3364.31	3760.35	3998.82
Eif5a	20284.8	0.867279	0.141968	6.10899	1.00262e-09	4.47074e-07	24831	27133.5	22806.5	14146.3	15215.8	28285.4	17020.9	26034.5	12776.2	15429.8	15552.8	25945.9	15807.9	16121.1	20468.6	26981.4
Creld2	1476.79	1.52116	0.249268	6.10252	1.04409e-09	4.5146e-07	2263.3	1494.06	1324.09	669.613	835.153	3210.84	1236.25	1782.85	932.84	1176.16	1134.53	1915.66	891.887	1129.49	1457.7	2174.2
Rpl17	9976.14	0.693351	0.113787	6.09343	1.10514e-09	4.63802e-07	11477.4	12270.7	8539.27	8059.08	8572.58	14970.4	9108.06	12906.4	8374.9	7153.62	8116.69	12231.6	7623.02	8847.13	9389.59	11977.6
Spry4	167.669	4.05937	0.667213	6.08407	1.17168e-09	4.77677e-07	626.153	122.334	119.33	9.66633	7.39892	400.945	57.9209	216.671	21.6482	51.3562	122.144	483.775	27.7229	74.5265	113.075	228.039
1190002N15Rik	621.641	-2.04927	0.337969	-6.06349	1.33197e-09	5.1983e-07	223.964	261.658	441.999	1000.9	1058.97	303.713	628.079	186.815	1139.48	986.845	405.189	251.609	1432.09	789.981	556.609	278.342
Trib3	921.174	3.8119	0.628862	6.06158	1.34794e-09	5.1983e-07	931.813	428.835	686.692	142.705	123.472	3546.23	403.039	1793.22	305.871	449.571	121.464	2970.49	139.678	292.049	678.549	1725.1
Rps15	13046.6	0.772002	0.127634	6.04855	1.46159e-09	5.48828e-07	13783.9	16852.8	12149.8	9598.95	11442.7	19523.9	12141.6	17854.4	9740.42	9639.78	9267.07	15803.2	10439.9	10404.7	12721.4	17381.3
Gm26992	30.4861	20.7798	3.44649	6.02927	1.64704e-09	6.02606e-07	0	54.3705	0	0	0	103.787	0	4.26518	4.92004	0	103.352	57.1838	0	108.478	0	51.4206
Got1	1186.74	1.72949	0.287576	6.01402	1.80975e-09	6.45582e-07	1488.32	1448.39	1150.73	543.086	629.872	2655	731.766	1650.97	551.879	1000.08	691.811	1992.66	587.336	894.874	1237.56	1733.51
Rplp1	17610.4	0.950021	0.158153	6.00697	1.8902e-09	6.57835e-07	20260.9	21816.2	15994.1	11414.2	13817.5	27671.8	16142.7	26288	11315.1	14406.9	11090.4	23470.5	12846	14004.4	17154.1	24073.8
Rpl41	22097.2	0.8668	0.14454	5.99695	2.01063e-09	6.83086e-07	27157.9	27661.9	20446.7	15667.1	17226.9	34020.4	19141.4	31641.6	16029.1	18772.7	14244.6	28151.5	16403.7	16959.4	21813.1	28216.8
Serpine1	6519.32	3.09222	0.518548	5.96323	2.47307e-09	8.20657e-07	4619.71	8899.06	5073.89	1548.31	3509.8	30238.4	3409.97	6370.66	1051.92	3365.84	4313.63	7261.48	1258.83	4661.41	3995.47	14730.7
Ptbp2	152.071	-1.79108	0.306292	-5.84762	4.98654e-09	1.61711e-06	69.3973	88.3521	84.0085	300.535	254.338	78.6596	149.327	77.6263	202.706	291.018	221.973	112.08	205.15	134.976	110.445	52.5384
Nup62	718.082	1.41388	0.242166	5.83846	5.26849e-09	1.67058e-06	717.631	795.169	795.217	398.077	373.646	1147.12	835.327	728.493	608.117	540.751	633.034	1247.75	358.022	665.77	577.646	1067.54
Rps8	16987.7	1.15397	0.197954	5.82949	5.55963e-09	1.72457e-06	17413.7	24432	16011.3	12206.3	12892.4	29772.5	14206.6	26184	12399.8	9744.08	11472.7	23181.7	9248.69	13507.5	16903.2	22226.7
Rpl11	9492.26	0.959226	0.164898	5.81708	5.98829e-09	1.81802e-06	10781.3	12773.2	8603.84	7531.55	7688.33	15129.1	8520.51	12938.6	7584.29	5739.26	7125.86	12370.5	5504.97	7961.95	9233.05	12389.8
Hmga1	4367.09	2.24656	0.387633	5.79559	6.80823e-09	2.02389e-06	3710	5372.16	4487.24	1072.3	2034.73	11240.8	3864.46	8111.49	1943.96	3229.34	2229.09	7053.85	1792.45	2326.81	4767.55	6637.19
2310030G06Rik	623.553	-1.14387	0.199168	-5.74326	9.28729e-09	2.69203e-06	649.811	429.301	493.55	994.753	974.808	405.315	741.206	458.081	584.501	616.274	699.978	418.586	828.52	661.63	589.041	431.486
S100a14	10855	1.16379	0.202729	5.74062	9.43313e-09	2.69203e-06	14594.7	13544.3	10970.9	5060.44	6200.5	14102.3	9137.03	16121.1	7384.37	7485.28	10571.2	17042.4	7970.91	7935.59	10116.7	15443.1
Ankle1	55.6675	2.44421	0.429424	5.69183	1.25682e-08	3.51639e-06	53.71	107.214	69.2654	14.8641	9.82574	106.803	36.4201	77.7044	55.7107	46.114	54.1251	68.7079	30.9776	35.0403	30.5703	93.6273
Chac1	629.91	3.50953	0.61762	5.68235	1.32857e-08	3.64564e-06	1446.3	177.837	455.364	105.451	77.6887	2103.05	161.997	1194.25	120.049	201.397	164.424	1924.81	121.189	199.566	439.151	1186.03
Reg3g	1513.12	-9.23448	1.62707	-5.67554	1.38254e-08	3.72215e-06	436.71	2.36247	1074.83	3118.6	6.75134	0	1988.07	315.844	695.058	64.3647	11223.3	505.002	3378.29	964.882	427.531	8.30989
Mthfd2	1034.29	3.02746	0.53385	5.671	1.41968e-08	3.75137e-06	1281.66	626.724	1074.34	247.018	159.283	3596.87	442.274	1639.5	385.432	573.102	299.916	2778.93	329.277	550.781	787.777	1775.81
Rps6	13568.4	1.03864	0.183271	5.66724	1.45118e-08	3.7649e-06	14597.5	17585.6	12405.8	10601.3	10702.9	24549.5	12167.7	19309	9311.06	7474.95	8889.49	17568	8178.41	11107.8	14216.8	18428.9
Ddit3	693.73	3.15722	0.562786	5.60999	2.02339e-08	5.08274e-06	1418.39	275.425	402.296	149.102	164.365	2962.99	358.138	1007.18	190.191	180.574	274.693	1873.97	156.159	279.217	456.199	950.787
Snd1	8114.42	1.10017	0.19613	5.60939	2.03039e-08	5.08274e-06	8427.21	9895.43	8340.31	4573.73	4546.34	13356.9	6951.03	10474.8	7861.45	8327.23	6073.28	9894.25	5818.66	7721.95	8793.17	8774.96
Tnfrsf8	109.535	4.51484	0.80532	5.60626	2.06741e-08	5.08619e-06	302.129	302.157	114.802	10.0634	10.0281	47.3826	76.2971	58.8591	143.42	16.874	142.902	86.0823	7.42161	68.9672	86.402	278.771
Serpinb2	96.8319	4.49278	0.802759	5.59668	2.18501e-08	5.28439e-06	32.7262	333.617	156.254	4.75662	13.2407	72.9533	135.365	94.0455	23.0808	52.598	218.626	99.6502	5.00205	123.381	86.1948	97.8206
Fosl1	197.485	3.9047	0.698082	5.59348	2.22566e-08	5.28589e-06	271.28	74.7595	131.741	31.6353	37.9195	1121.99	74.2111	214.965	26.5682	19.1327	46.9784	567.263	32.4755	59.6212	118.334	330.88
Wdr89	391.778	1.04417	0.186765	5.59084	2.25972e-08	5.28589e-06	341.741	574.175	359.165	288.997	307.066	619.566	289.267	441.892	290.889	373.177	292.124	503.074	269.223	320.192	408.039	589.869
Rpsa	2873.61	1.37108	0.246527	5.56158	2.67336e-08	6.15262e-06	3004.59	4586.38	2571.81	1161.72	1771.12	4604.86	2681.56	4340.25	1776.14	2549.68	1625.45	3961.69	2286.75	2329.37	2414.89	4311.5
Rcan3	2187.92	1.23597	0.22285	5.54619	2.91958e-08	6.61261e-06	3721.75	2745.67	2181.49	1198.72	1550.3	2856.37	2119.88	2643.14	1801.17	1085.03	1707.16	3003.91	964.003	2056.76	2229.45	3141.98
Manf	3797.98	1.76128	0.318857	5.52372	3.31887e-08	7.39953e-06	6015.78	4085.08	3768.63	1067.85	1876.36	8610.64	3261.08	4381.53	2679.06	3490.74	2307.28	5504.8	2374.83	2781.11	3225.8	5337.13
Fam208a	365.397	-1.5988	0.290648	-5.50083	3.78018e-08	8.17263e-06	257.085	178.97	330.306	761.004	336.651	186.816	374.676	210.7	604.181	439.045	409.887	271.051	531.489	471.173	311.175	172.147
Pold2	1084.74	1.16519	0.211769	5.50215	3.75182e-08	8.17263e-06	1219.47	1569.25	1302.05	635.404	655.882	1640.67	841.272	1500.84	664.363	1008.17	851.794	1463.08	795.654	875.103	861.355	1471.48
Rpl10a	10866.3	1.0123	0.18486	5.47605	4.34919e-08	9.26247e-06	9957.8	14138.8	7966.52	8723.23	8838.27	19562.9	9870.57	14968.8	8193.46	8402.88	8283.07	14773.8	7202.04	7915.95	8815.05	16248.1
Zcchc11	1446.18	-1.31652	0.24062	-5.47135	4.46624e-08	9.37188e-06	886.103	834.142	1308.07	3119.76	1589	754.889	1528.14	969.734	1968.5	1770.35	1693.29	820.742	1703.06	1713.58	1492.77	986.774
Pmvk	1709.58	1.93894	0.355473	5.45455	4.90979e-08	1.01533e-05	3738.63	2368.62	2048.43	435.366	452.016	2727.49	1277.26	2214.83	1042.15	1199.75	972.344	2540.68	1135.12	1144.39	1394.41	2661.76
Pgrmc1	2865.28	-0.913038	0.167633	-5.44666	5.13245e-08	1.04621e-05	2856.33	2066.08	2871.56	4483.42	3590.33	2440.63	2601.01	2423.48	3531.61	2562.77	2757.63	2052.9	4255.87	2716.91	2592.83	2041.17
Pkhd1	1416.38	-1.6712	0.308134	-5.42363	5.84e-08	1.17367e-05	885.562	675.689	1063.05	3772.68	2794.67	971.213	1177.3	616.716	1712.97	949.627	1236.93	1119.45	2262.18	1403.55	895.149	1125.38
Kdm5d	437.312	-5.60921	1.03705	-5.40883	6.34389e-08	1.24001e-05	17.5754	31.3675	722.535	998.756	816.207	15.9974	1080.54	44.7364	21.3473	1089.65	59.2458	40.0954	1250.66	41.1779	751.576	15.5174
Zfp68	952.306	-1.09933	0.203236	-5.40913	6.33313e-08	1.24001e-05	668.494	659.796	952.977	1393.93	973.036	581.081	1185.99	789.585	1281.92	934.01	998.624	678.882	1256.18	1208.52	1223.54	450.334
Celsr2	408.251	1.74895	0.323673	5.40344	6.53754e-08	1.2606e-05	216.137	600.252	409.032	157.502	195.761	546.387	568.593	414.005	462.869	495.216	382.743	255.036	249.054	269.181	428.481	881.769
Slc6a9	1356.88	2.38	0.440859	5.39855	6.71804e-08	1.27813e-05	2714.88	1307.34	1592.3	459.394	419.466	3789.19	1019.24	1183.81	1533.08	724.52	775.516	2380.3	368.732	955.56	1089.64	1397.16
Gm13453	20.1745	7.23212	1.34284	5.3857	7.21628e-08	1.33726e-05	82.015	38.5125	0	0	0	15.2949	0	36.6806	33.4563	35.2444	30.536	33.1666	0	0	0	17.8854
Serinc5	1374.35	-1.62478	0.301586	-5.38744	7.14664e-08	1.33726e-05	525.211	1029.64	960.37	3502.73	2193.78	926.435	1342.14	719.11	1524.23	1187.23	1556.16	912.654	2114.86	1657.8	1260.48	576.805
Acly	11796.4	0.684597	0.127396	5.37379	7.71007e-08	1.41045e-05	11983	14530	12911.2	9645.83	9127.27	15908.6	11316.2	13560.5	8219.11	11139.7	8631.21	12337.8	9413.59	11923.8	13230.6	14864.2
Gnb2l1	28814.5	0.869455	0.161955	5.36849	7.93994e-08	1.43411e-05	26806.7	37611.1	27011.4	21383.6	24512.9	48711.9	26039.5	39302	20534.2	21829.3	18299.9	34994.5	22459.7	24413.1	28560.4	38561.4
Wnt4	1759	-1.56633	0.29197	-5.3647	8.10832e-08	1.44622e-05	731.826	1114.6	1288.77	3092.35	3482.12	762.561	2037.19	1568.73	2019.19	1685.69	2137.52	1311.8	2652.69	1290.97	1729.43	1238.56
Plek2	1369.32	1.01584	0.189961	5.34762	8.9117e-08	1.56989e-05	1410.03	1840.67	1327.91	879.636	1260.59	2460.3	1237.15	1623.33	877.736	923.405	894.939	2011.73	892.679	1159.3	1279.76	1829.9
Srm	898.473	1.28092	0.240962	5.31586	1.06156e-07	1.82499e-05	991.454	1308.63	950.188	702.469	651.271	1726.87	637.78	1196.58	486.503	481.586	567.758	1363.43	408.293	753.405	905.354	1243.98
Ugt1a6b	165.703	23.5858	4.43589	5.31703	1.05473e-07	1.82499e-05	413.039	0	0	0	0	913.494	0	0	972.653	260.619	3.50727	0	0	0	0	87.9369
Gpr89	979.891	0.728892	0.137415	5.3043	1.13104e-07	1.92129e-05	1137.23	1484.57	919.791	824.601	817.857	1334.87	820.991	980.463	891.743	710.076	642.906	1087.64	864.289	855.813	970.123	1335.3
Rps14	13130.4	0.722541	0.136377	5.29811	1.17008e-07	1.96422e-05	13492.8	16106.1	11607.4	9772.08	11923.6	19727.3	12534.3	18222.8	9885.11	9500.68	9311.94	15178.7	11091.8	11000.7	12462.1	18268.2
Birc2	910.61	-0.725881	0.137089	-5.29498	1.19028e-07	1.97489e-05	785.221	779.716	742.369	1349.94	1211.25	771.7	978.38	792.753	1051.54	981.069	905.738	754.491	1115.95	888.442	789.445	671.755
Apol10a	21.3663	-20.432	3.86631	-5.28462	1.25968e-07	2.05779e-05	18.9265	0	12.4103	39.5441	0	0	0	0	0	0	259.556	3.43103	6.33667	1.65615	0	0
Rpl13	10972.3	0.993655	0.188076	5.28325	1.26909e-07	2.05779e-05	11551.1	14698.6	9552.22	7321.69	7405.67	18469.6	8953.7	14858.4	6957.5	10398.5	7852.3	14515.8	9387.42	8399.32	10384.2	14850.9
Ttc14	190.845	-1.50439	0.286125	-5.2578	1.45793e-07	2.33744e-05	122.787	113.677	136.716	334.462	228.667	90.6166	193.477	147.995	228.88	190.892	276	176.659	322.513	246.901	134.943	108.332
Etv1	24.4524	4.37715	0.835766	5.2373	1.62946e-07	2.58342e-05	27.8244	46.5661	55.8949	8.44949	0.615126	30.2596	22.9331	34.3693	10.3298	22.9104	10.1547	35.0544	0.526814	23.4387	18.5994	43.3116
Arfgef1	6208.27	-1.07158	0.204744	-5.23377	1.66086e-07	2.60427e-05	7451.08	3915.2	6218.05	8712.35	5663.41	3159.44	6234.65	5234.73	8667.14	7845.59	9043.96	4626.24	7379.27	6488.43	5415.39	3277.38
6330419J24Rik	351.061	3.30287	0.633932	5.21013	1.88707e-07	2.9268e-05	72.5517	606.005	683.524	52.7254	67.5152	205.389	249.784	273.825	232.226	307.13	762.225	387.706	59.4063	335.369	360.262	961.341
Fkbp11	244.888	1.959	0.378304	5.17838	2.23825e-07	3.43415e-05	384.84	295.64	208.112	74.6944	119.308	604.149	191.863	295.151	157.441	79.5518	113.923	438.028	133.07	140.772	309.422	372.24
Ppif	2446.85	2.26912	0.438399	5.17592	2.2679e-07	3.44262e-05	7732.53	1667.03	2631.18	654.782	759.708	4765.1	1617.12	2481.86	1345.2	880.35	1262.58	4970.91	879.863	1246.21	1627.57	4627.57
Zbtb33	695.998	-1.14038	0.221824	-5.14092	2.73403e-07	4.10652e-05	501.397	504.434	542.696	1160.16	773.088	377.949	714.184	372.138	894.289	952.831	950.45	490.106	891.684	885.742	725.745	399.072
Sdf2l1	1382.34	1.64969	0.321157	5.13672	2.79571e-07	4.15542e-05	2572.43	1444.22	1469.19	467.499	588.214	2878.72	1146.65	1478.31	984.993	1122.79	702.327	1963.69	906.936	1158.47	1396.34	1836.61
Sec61g	2153.52	0.697479	0.136083	5.12539	2.9693e-07	4.36793e-05	3173.48	2604.04	2527.41	1686.12	1504.92	2737.28	1956.65	2560.81	1681.39	1486.34	1568.99	2532.48	1724.73	1978.89	2101.21	2631.61
Xlr3b	165.167	-24.826	4.85677	-5.11163	3.19392e-07	4.65041e-05	0	0	4.36815	1228.9	0	0	0	0	1360.54	38.1106	10.7479	0	0	0	0	0
Gpr128	168.31	-5.58326	1.09541	-5.09697	3.45137e-07	4.97451e-05	1047.27	7.92904	30.5485	577.343	295.957	10.9249	40.7256	11.9425	27.5522	20.1397	151.505	91.4941	245.546	106.821	22.7903	4.47135
Nme2	6319.54	0.7975	0.157119	5.07577	3.85935e-07	5.47915e-05	6824.67	9246.6	7221.47	5107.33	4747.67	8671.97	4742.81	8643.49	3918.73	4100.04	4233.22	8071.05	5445.73	5351.33	6110.32	8676.28
Rpl28	10870.5	0.840091	0.16554	5.07484	3.8783e-07	5.47915e-05	11170.4	13506.9	9597.69	7016.17	8755.39	16452.6	9714.54	15563.3	9030.87	9752.38	7521.25	13839.2	8613.02	8925.67	10777.2	13692.2
Pbp2	298.737	1.94741	0.384543	5.06423	4.1006e-07	5.73642e-05	564.642	368.134	335.079	47.4529	71.2146	409.685	214.488	655.985	123.001	168.166	232.543	751.395	140.991	231.032	240.174	225.803
Shc1	4794.82	0.81873	0.161792	5.06039	4.184e-07	5.79627e-05	4803.74	6317.61	4666.98	3049.3	3872.35	4752.26	4614.03	4748.69	4923.47	4936.35	4290.62	5391.26	3570.06	4603.45	4740.39	7436.63
Gale	1881.21	1.84434	0.364785	5.05596	4.28232e-07	5.87543e-05	5938.7	2372.69	1835.91	653.706	664.798	3344.22	1431.33	1896.91	1211.64	964.57	1459.5	2895.75	862.83	1058.45	1391.24	2117.07
S100a7a	423.813	2.86299	0.567267	5.04698	4.48845e-07	6.09959e-05	1474.69	507.458	534.599	36.029	41.6189	648.941	406.351	446.138	197.786	71.4959	98.6546	1163.12	121.189	220.267	519.794	292.874
Eif2s3y	250.883	-11.0846	2.19727	-5.04469	4.54254e-07	6.11486e-05	0.58434	0	572.908	5.50554	485.108	0	832.025	0.316041	8.15375	587.097	9.73188	0	844.404	6.86162	661.433	0
Reg3b	8300.99	-9.14947	1.81494	-5.04121	4.62604e-07	6.16906e-05	3802.66	0	5713.53	8100.38	10.1735	0	10408.6	3280.78	8935.78	698.847	43483.2	2864.91	19819.5	12628.9	13019.4	49.1849
Atad1	1329.39	-0.801525	0.159242	-5.03339	4.81893e-07	6.36678e-05	1181.33	1022.85	1357.5	2058.05	1388.22	1046.61	1375.62	1007.44	1503.57	1534.64	1504.48	1048.75	1641.2	1514.54	1235.93	849.557
Odc1	8250.06	0.862485	0.171463	5.03016	4.90069e-07	6.4154e-05	9619.41	8451.22	7593.22	5925.46	7110.37	12863	7511.61	9463.59	7317.09	6763.91	6216.42	10458.9	5105.78	7488.26	8444.67	11668
Il13ra1	3332.31	-1.20435	0.239557	-5.02742	4.97132e-07	6.44871e-05	3432.01	1813.48	3370.84	4268.12	4644.67	2003.63	3946.76	1558.5	4747.84	3869.84	4094.17	1889.35	4445.18	3769.39	3483.41	1979.69
Cldn6	209.757	24.3952	4.85676	5.02293	5.08886e-07	6.54171e-05	1891.08	0	0	0	0	1465.03	0	0	0	0	0	0	0	0	0	0
Olfr77	105.08	1.05715	0.21114	5.00687	5.53213e-07	7.04803e-05	134.063	149.519	92.6003	66.7855	73.0644	156.227	82.3562	105.777	94.4648	115.803	92.7823	132.666	73.6638	71.2142	101.68	138.612
Zbtb14	377.939	-0.660218	0.132087	-4.99837	5.78182e-07	7.30095e-05	297.507	341.79	328.491	460.812	507.215	298.918	377.869	305.908	457.873	427.775	451.604	344.939	467.527	374.161	337.047	267.586
Xlr4a	112.533	-24.1976	4.85681	-4.98221	6.28635e-07	7.86841e-05	0	0	0	926.982	0	0	0	0	760.589	112.007	0.949924	0	0	0	0	0
Pdia6	9045.28	1.33963	0.269352	4.97354	6.57407e-07	8.01756e-05	14201	9334.34	8931.03	4898.57	6172.02	18028.1	7586.85	8853.35	6552.58	7366.39	5119.97	10982.6	5117.8	7103.79	10868.5	13607.5
Rpl36	3170.78	0.817206	0.164242	4.97562	6.50376e-07	8.01756e-05	3135.5	3924.87	2696.86	2258.41	2730.2	5087.74	2643.54	4300.16	2476.75	2843.72	2299.59	4094.36	2539.42	2428.74	3021.46	4251.14
Spred2	1497.53	0.924956	0.185948	4.97427	6.54925e-07	8.01756e-05	1594.69	1771.16	1443.99	946.945	1010.65	2341.61	1504.31	1334.93	1469.94	1322.55	1438.39	2098.32	1027.92	1574.61	1525.29	1555.21
Myom1	45.2423	-2.3524	0.474965	-4.95279	7.3156e-07	8.77196e-05	15.8352	27.2941	16.2939	147.185	79.8568	13.1624	35.4368	17.9855	77.0599	83.9142	44.8081	13.779	65.2109	35.7496	33.4422	16.8629
Syt12	635.761	-1.45287	0.293256	-4.95427	7.2602e-07	8.77196e-05	264.65	330.381	841.085	800.198	891.948	227.628	684.434	559.551	770.743	866.071	1186.73	299.395	833.675	639.022	612.246	364.419
Pcnx	190.049	-1.65123	0.334437	-4.93735	7.91919e-07	9.41657e-05	121.445	84.954	132.695	309.323	246.939	109.249	161.997	133.927	140.713	349.424	223.147	107.506	373.072	220.267	224.397	101.723
S100a3	60.4331	2.0865	0.423505	4.92673	8.36171e-07	9.8606e-05	53.6252	132.528	98.3281	28.999	37.9195	64.4571	56.1108	72.5081	20.6642	25.1746	23.4892	56.0401	17.4259	49.6844	70.1239	159.851
Fdps	9366.91	1.51118	0.307294	4.91769	8.75715e-07	0.000102423	14308.5	10996.4	10881	4252.31	2905.93	15092.8	7651.89	16218.8	5220.17	8277.41	4424.19	13967.7	6452.32	6842.36	9670.09	12708.7
Smox	8125.34	1.67859	0.341937	4.90907	9.1511e-07	0.00010616	8388.17	7052.18	8956.36	2054.35	3583.37	9008.34	9573.31	17080.6	4576.26	7460.46	8767.23	13973.9	3198.1	5650.26	8458.13	12224.5
[truncated: 21,795 more rows]

## Sheet: DE_G12RvsWT_results
Gene	baseMean	log2FoldChange	lfcSE	stat	pvalue	padj	MZ110	MZ222	MZ248	MZ392	MZ394	MZ517	MZ521	MZ572	MZ585	MZ698	MZ753	MZ831	MZ838	MZ89	MZ983	MZ988
[truncated: 21,919 more rows]

[truncated: 4 more sheets: DE_G13DvsWT_results, DE_G12CvsG12D_results, DE_G12RvsG12D_results, DE_G13DvsG12D_results]
